# Supplementary material for: Synthesis of polysubstituted bicyclo[2.1.1]hexanes enabling access to new chemical space
Source: PubMed Central journal article supplement — Chem Sci. 2023 Aug 30;14(36):9885–91. doi: 10.1039/d3sc03083k (PMC10510755; doi:10.1039/d3sc03083k), 2023-08-30
Supplement: SC-014-D3SC03083K-s001.pdf [file SC-014-D3SC03083K-s001.pdf]

## Supporting Information

### Table of Contents

|          |                                                                                                |      |
|----------|------------------------------------------------------------------------------------------------|------|
| <b>1</b> | General Information                                                                            | S2   |
| <b>2</b> | Reaction optimisation                                                                          | S5   |
| <b>3</b> | Cyclic Voltammetry                                                                             | S7   |
| <b>4</b> | Proposed transition states for [2+2] crossed cycloadditions to<br>BCHs <b>2u</b> and <b>2z</b> | S8   |
| <b>5</b> | Overview of synthetic strategies to dienes <b>1</b>                                            | S9   |
| <b>6</b> | Synthesis Procedures                                                                           | S10  |
|          | <b>6.1</b> General Procedures                                                                  | S10  |
|          | <b>6.2</b> Synthesis of dienes <b>1a–ab</b>                                                    | S11  |
|          | <b>6.3</b> Synthesis of BCH <b>2a–ab</b>                                                       | S62  |
|          | <b>6.4</b> Synthesis of BCH <b>3, 4, 6, 8-10</b>                                               | S90  |
| <b>7</b> | NMR Spectra                                                                                    | S96  |
|          | <b>7.1</b> NMR Spectra of compounds towards dienes <b>1a–ab</b>                                | S96  |
|          | <b>7.2</b> NMR Spectra of BCH <b>2a–2ab</b>                                                    | S216 |
|          | <b>7.3</b> NMR Spectra of BCH <b>3, 4, 6, 8-10</b>                                             | S290 |
| <b>8</b> | Crystallographic Supplement                                                                    | S302 |
| <b>9</b> | References                                                                                     | S308 |

## 1 General Information

### Reagents and Solvents

Standard solvents and reagents were obtained from *ABCR*, *Acros*, *Alfa Aesar*, *BLD*, *Merck*, *Sigma-Aldrich* or *Tokyo Chemical Industry* (TCI).  $\text{CH}_2\text{Cl}_2$ , THF, and PhMe were obtained from a MBraun Solvent Purification System, stored over activated 3 Å molecular sieves and sparged with argon prior to use. MeCN (ExtraDry over molecular sieves, AcroSeal™) was purchased from *Acros*. HPLC grade Acetone,  $\text{CHCl}_3$ , and EtOH were used as received. Brine refers to a saturated solution of NaCl in deionized  $\text{H}_2\text{O}$ .

### Reactions

Reactions were performed using standard Schlenk techniques. Glassware for reactions was dried under vacuum using a heat gun. All reactions were stirred with magnetic followers. All stated temperatures refer to external bath temperatures.

### Chromatography

Flash column chromatography was performed on *Sigma Aldrich* silica gel (40–63  $\mu\text{m}$ , 230–400 mesh, product number 717185) according to the method reported by W. C. Still and co-workers.<sup>1</sup> Technical grade solvents were distilled prior to use. TLC analyses were performed on MilliporeSigma silica gel 60 F254 aluminium backed plates with layer thickness of 200  $\mu\text{m}$  (product number EM1.05554.0001). Product spots were visualised under UV light ( $\lambda_{\text{max}} = 254 \text{ nm}$ ) and/or by staining with  $\text{KMnO}_4$ , vanillin, or phosphomolybdic acid solution.

### Nuclear Magnetic Resonance (NMR) Spectroscopy

All spectra were recorded in  $\text{CDCl}_3$  or  $\text{CHCl}_3$  on *Bruker Avance III* 300 MHz, *Avance III HD* 300 MHz, *Avance III 400*, *Avance III HD 400* MHz or *Avance Neo 400* MHz instruments with the deuterated solvent acting as internal deuterium lock.  $^1\text{H}$  NMR spectra were recorded at 300 or 400 MHz,  $^{13}\text{C}$  NMR spectra at 101 MHz with broadband proton decoupling,  $^{19}\text{F}$  NMR spectra at 377 MHz with broadband proton decoupling as stated,  $^{11}\text{B}$  NMR spectra at 161 MHz with broadband proton decoupling,  $^{29}\text{Si}$  NMR spectra at 99 MHz with broadband proton decoupling as stated. The residual protic solvent signal acted as an internal reference for  $^1\text{H}$  NMR and the deuterated solvent carbon signal acted as an internal reference for  $^{13}\text{C}$  NMR ( $\text{CHCl}_3$ :  $^1\text{H}$  NMR = 7.26 ppm,  $\text{CDCl}_3$ :  $^{13}\text{C}$  NMR = 77.16 ppm).  $^{19}\text{F}$ ,  $^{11}\text{B}$ , and  $^{29}\text{Si}$  chemical shifts are given in ppm relative to  $\text{CFCl}_3$ ,  $\text{BF}_3 \cdot \text{OEt}_2$ , and  $\text{Me}_4\text{Si}$  (external standards). Chemical shifts are reported to 0.01 ppm for  $^1\text{H}$ ,  $^{19}\text{F}$ ,  $^{11}\text{B}$ , and  $^{29}\text{Si}$  NMR spectra and to 0.1 ppm for  $^{13}\text{C}$  NMR. Peaks that are within 0.01 ppm for  $^1\text{H}$  NMR or 0.1 ppm for  $^{13}\text{C}$  NMR but are still distinguishable are reported to 0.001 ppm and 0.01 ppm, respectively. Coupling constants are quoted to the nearest 0.1 Hz for  $^1\text{H}$  NMR and  $^{13}\text{C}$  NMR. The multiplicity of a signal is reported as follows: s–singlet, d–doublet, t–triplet, q–quartet, quint.–quintet, sext.–sextet, sept.–septet, m–multiplet, br.–broad, app.–apparent, or combinations thereof. Structural assignments were made with the aid of COSY, HSQC, and HMBC experiments.

### Infrared Spectroscopy

Fourier-transform infrared (FTIR) spectra were recorded from neat samples on a *Jasco FT/IR-4100* spectrometer equipped with an ATR unit. Selected absorption maxima are given in wavenumbers ( $\text{cm}^{-1}$ ).

### UV/Vis Spectroscopy

UV/Vis spectra were recorded on a *Jasco V-650 Spectrophotometer*.

### Mass Spectrometry

High resolution mass spectra (HRMS) were obtained from the *Analytical Facility* at the *Institut für organische and biomolekulare Chemie, Georg-August-Universität Göttingen*.

### Melting Points

Melting points (M.P.) were obtained from recrystallized samples (if not noted otherwise) using a *Büchi* melting point determination apparatus instrument and are uncorrected. The solvent used for recrystallisation is quoted in parentheses.

### X-Ray Crystallography

Data collection was done on two dual source equipped *Bruker D8 Venture* four-circle-diffractometer from *Bruker AXS GmbH*; used X-ray sources: microfocus  $1\mu\text{S}$  3.0 Ag/Mo from *Incoatec GmbH* with mirror optics *HELIOS* and single-hole collimator from *Bruker AXS GmbH*; used detector: *Photon III HE* (Ag/Mo) from *Bruker AXS GmbH*.

Used programs: *APEX3 Suite* (v2019.11-0) for data collection and therein integrated programs *SAINT V8.40A* (Integration) und *SADABS 2016/2* (Absorption correction) from *Bruker AXS GmbH*; structure solution was done with *SHELXT*, refinement with *SHELXL-2018/3*,<sup>2</sup> *OLEX2* and *FinalCif* were used for data finalization.<sup>3</sup>

Special Utilities: *SMZ1270* stereomicroscope from *Nikon Metrology GmbH* was used for sample preparation; crystals were mounted on *MicroMounts* or *MicroLoops* from *MiTeGen* in *NVH oil*; for sensitive samples the *X-TEMP 2 System* was used for picking of crystals<sup>4</sup>; crystals were cooled to given temperature with *Cryostream 800* from *Oxford Cryosystems*.

Refinement with non-spherical structure factors was carried out with *NoSpherA2* as implemented in *OLEX2* using *olex.refine*.<sup>5</sup> The wavefunction for calculation of non-spherical atomic form factors was done at *B3LYP/def2-TZVP* level of theory and reiterated during refinement until converged.

| Identifier | CCDC number | Identifier | CCDC number |
|------------|-------------|------------|-------------|
| <b>2a</b>  | 2262000     | <b>2r</b>  | 2289325     |
| <b>2g</b>  | 2262001     | <b>2s</b>  | 2289324     |
| <b>2n</b>  | 2289323     | <b>2ab</b> | 2261999     |

### Cyclic Voltammetry

Cyclic voltammetry measurements were performed with a *Gamry 1010 T* using *Gamry Framework Software*. A standard three electrodes setup was used with a glassy carbon working electrode (*ALS 013714, ZL722, 6x3 mm*), a platinum disc counter electrode (*ALS 002422, AE077, 6x3 mm*) and an SCE reference electrode (*ALS 013693, RE-2BP Calomel reference electrode*).

### Specific Rotation

Specific rotation measurements were performed on a *Jasco P-2000* polarimeter equipped with a *Na/Hg lamp* ( $\lambda = 589 \text{ nm}$ ) using a *1.00 dm* quartz sample cell at the stated temperature and concentration. The specific rotation is given in degree ( $^{\circ}$ ) as the mean value over five measurements.

### High Pressure Liquid Chromatography

HPLC analyses were performed using a Shimadzu Nexera-i LC2040C 3D or Interchim PuriFlash 4.250. Specific conditions such as column type used, eluent mixtures, flow rates and temperatures are stated for each compound. System control and chromatogram analysis were carried out with Intersoft (Interchim) or LabSolutions (Shimadzu) software.

### Photochemical Experiments

Photochemical experiments were conducted in a photoreactor of in-house design. The reaction chamber was surrounded by 700 blue LEDs (456 nm) (revoART, 102 mW output/LED, 5 m LEDs total, product number: X105-0700). Schlenk tubes were placed in a circular stand at a distance of approximately 5 cm from the LEDs. The photoreactor was cooled internally by a fan installed in the top of the reactor. The complete reactor setup was placed on top of a standard magnetic stirrer.

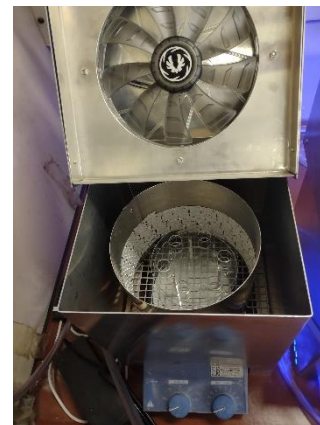

### Compound Naming

Compound names were generated by the computer program *ChemDraw* according to the guidelines specified by the International Union of Pure and Applied Chemistry (IUPAC).

## 2 Reaction optimisation

### Catalysts used in optimisation

4CzIPN, 6 2CzPN, 7 and 3DPA2FBN8 were prepared using literature procedures.  $[\text{Ru}(\text{bpy})_3]\text{Cl}_2$  and  $[\text{Ir}\{\text{dF}(\text{CF}_3)\text{ppy}\}_2(\text{dtbbpy})]\text{PF}_6$  (*Sigma Aldrich* and *TCI*) were purchased from the indicated supplier and used as received.

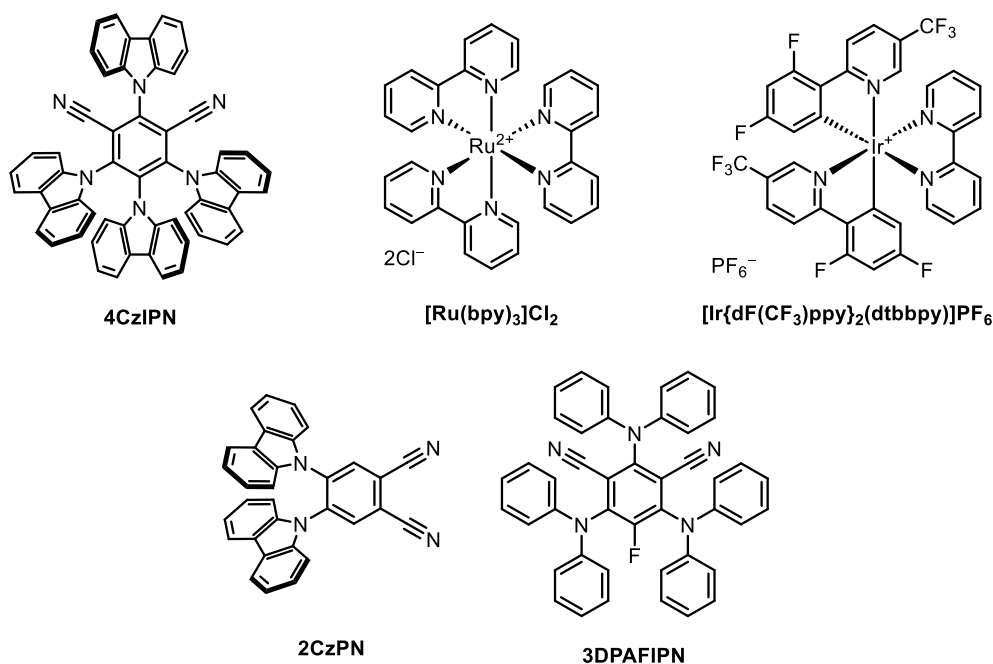

**Figure S1.** Catalysts used in reaction optimisation.

**Table S1.** Initial catalyst screening

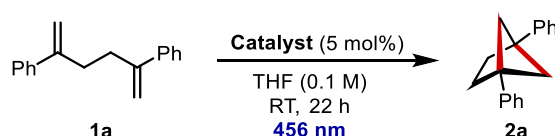

| Entry | Catalyst                                                                      | Conversion (%) <sup>[a]</sup> | Yield (%) <sup>[b]</sup> |
|-------|-------------------------------------------------------------------------------|-------------------------------|--------------------------|
| 1     | $[\text{Ru}(\text{bpy})_3]\text{Cl}_2$                                        | <5                            | n.d.                     |
| 2     | 4CzIPN                                                                        | 14                            | n.d.                     |
| 3     | $[\text{Ir}\{\text{dF}(\text{CF}_3)\text{ppy}\}_2(\text{dtbbpy})]\text{PF}_6$ | <b>&gt;95</b>                 | <b>n.d.</b>              |
| 4     | 2CzPN                                                                         | 13                            | n.d.                     |
| 5     | 3DPAFIPN                                                                      | <5                            | n.d.                     |

Reactions performed with 10 mg of diene **1a**. [a] Conversion estimated by  $^1\text{H}$  NMR spectroscopy relative to unreacted diene **1a**. [b] Yield estimated from the  $^1\text{H}$  NMR of the reaction mixture relative to 1,3,5-trimethoxybenzene as internal standard. n.d. = not determined.

We initially elected to continue optimisation with 4CzIPN as the lower yield for this catalyst would allow us to better assess the impact of other variables and due to the lower cost of the catalyst.

**Table S2.** Solvent screening with a reaction time of 22 hours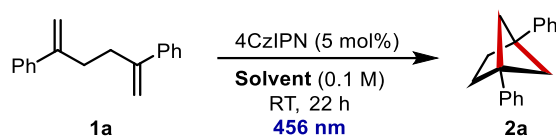

| Entry | Solvent                         | Conversion (%) <sup>[a]</sup> | Yield (%) <sup>[b]</sup> |
|-------|---------------------------------|-------------------------------|--------------------------|
| 1     | THF                             | 14                            | n.d.                     |
| 2     | DMSO                            | 4                             | n.d.                     |
| 3     | CHCl <sub>3</sub>               | 7                             | n.d.                     |
| 4     | CH <sub>2</sub> Cl <sub>2</sub> | 15                            | n.d.                     |
| 5     | MeCN                            | 18                            | n.d.                     |

Reactions performed with 10 mg of diene **1a**. [a] Conversion estimated by <sup>1</sup>H NMR spectroscopy relative to unreacted diene **1a**. [b] Yield estimated from the <sup>1</sup>H NMR of the reaction mixture relative to 1,3,5-trimethoxybenzene as internal standard. n.d = not determined.

**Table S3.** Solvent screening with a reaction time of 48 hours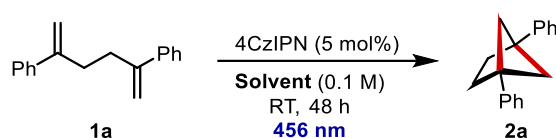

| Entry | Solvent                         | Conversion (%) <sup>[a]</sup> | Yield (%) <sup>[b]</sup> |
|-------|---------------------------------|-------------------------------|--------------------------|
| 1     | THF                             | 83                            | 55                       |
| 2     | CHCl <sub>3</sub>               | 9                             | 8                        |
| 3     | CH <sub>2</sub> Cl <sub>2</sub> | 23                            | 18                       |
| 4     | MeCN                            | 35                            | 22                       |

Reactions performed with 10 mg of diene **1a**. [a] Conversion estimated by <sup>1</sup>H NMR spectroscopy relative to unreacted diene **1a**. [b] Yield estimated from the <sup>1</sup>H NMR of the reaction mixture relative to 1,3,5-trimethoxybenzene as internal standard.

**Table S4.** Solvent concentration optimisation (reactions performed with 50 mg of **1a**)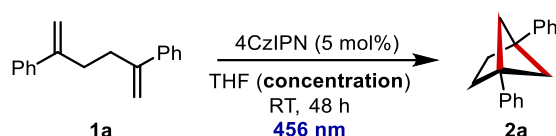

| Entry | Concentration (M) | Conversion (%) <sup>[a]</sup> | Yield (%) <sup>[b]</sup> |
|-------|-------------------|-------------------------------|--------------------------|
| 1     | 0.1               | 25                            | 19                       |
| 2     | 0.5               | 16                            | 11                       |
| 3     | 1.0               | 9                             | 9                        |

Reactions performed with 50 mg of diene **1a**. [a] Conversion estimated by <sup>1</sup>H NMR spectroscopy relative to unreacted diene **1a**. [b] Yield estimated from the <sup>1</sup>H NMR of the reaction mixture relative to 1,3,5-trimethoxybenzene as internal standard.

From these experiments (Table S4, Entry 1 vs. Table S3, Entry 1) it is also clear that the performance of 4CzIPN decreases at higher reaction scales. In contrast, [Ir{dF(CF<sub>3</sub>)ppy}<sub>2</sub>(dtbbpy)]PF<sub>6</sub> demonstrates excellent reactivity, even on 1.00 mmol scale (see Table S5).

**Table S5.** Control experiments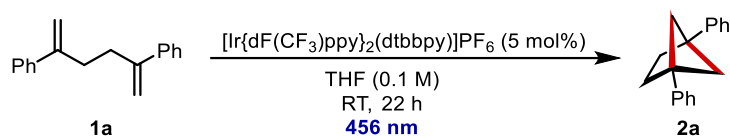

| Entry | Deviation from standard conditions    | Conversion (%) <sup>[a]</sup> | Yield (%) <sup>[b]</sup> |
|-------|---------------------------------------|-------------------------------|--------------------------|
| 1     | none                                  | >95                           | 94 <sup>[c]</sup>        |
| 2     | 1 mol% [Ir], 10 mg <b>1a</b>          | 27                            | n.d.                     |
| 3     | 1 mol% [Ir], 10 mg <b>1a</b> , 0.5 M  | 63                            | 54 <sup>[d]</sup>        |
| 4     | 1 mol% [Ir], 10 mg <b>1a</b> , 0.05 M | 26                            | 27 <sup>[d]</sup>        |
| 5     | No photocatalyst                      | <5                            | n.d.                     |
| 6     | Reaction in the dark                  | <5                            | n.d.                     |
| 7     | 1.00 eq. isoprene                     | n.d.                          | 46                       |
| 8     | 1.00 mmol <b>1a</b> , 66 h            | n.d.                          | 91                       |

Reactions performed with 42 mg of diene **1a**. [a] Conversion estimated by <sup>1</sup>H NMR spectroscopy relative to unreacted diene **1a**. [b] Yield estimated from the <sup>1</sup>H NMR of the reaction mixture relative to 1,3,5-trimethoxybenzene as internal standard. [c] isolated yield. [d] Yield estimated from the <sup>1</sup>H NMR of the reaction mixture relative to CH<sub>2</sub>Br<sub>2</sub> as internal standard.

### 3 Cyclic Voltammetry

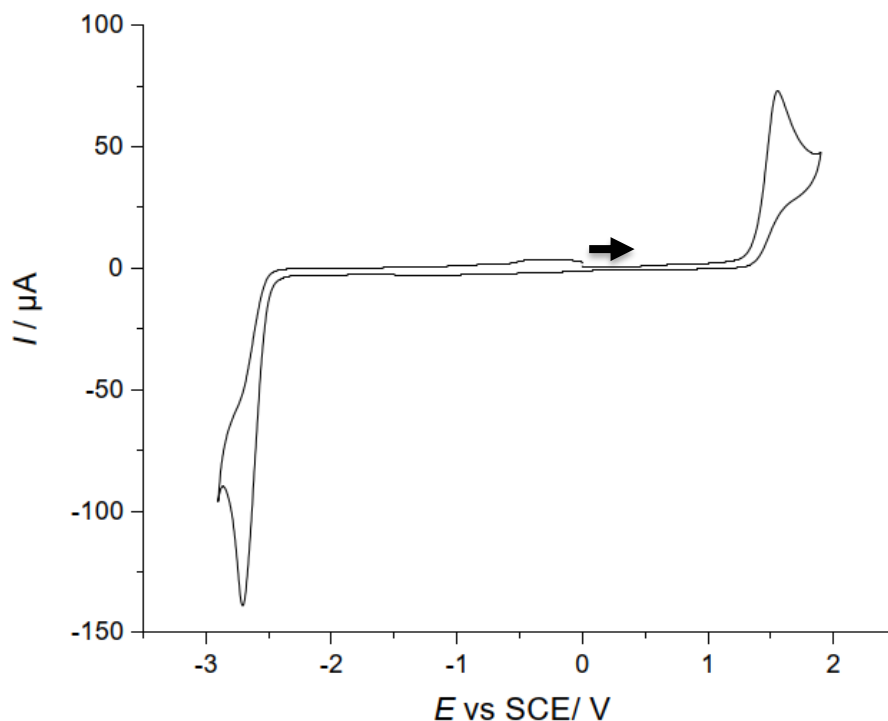

Cyclic voltammogram of diene **1a**,  $v = 100$  mV/s, NBu<sub>4</sub>PF<sub>6</sub> (0.2 M) MeCN.

## 4 Proposed transition states for [2+2] crossed cycloadditions to BCHs 2u and 2z

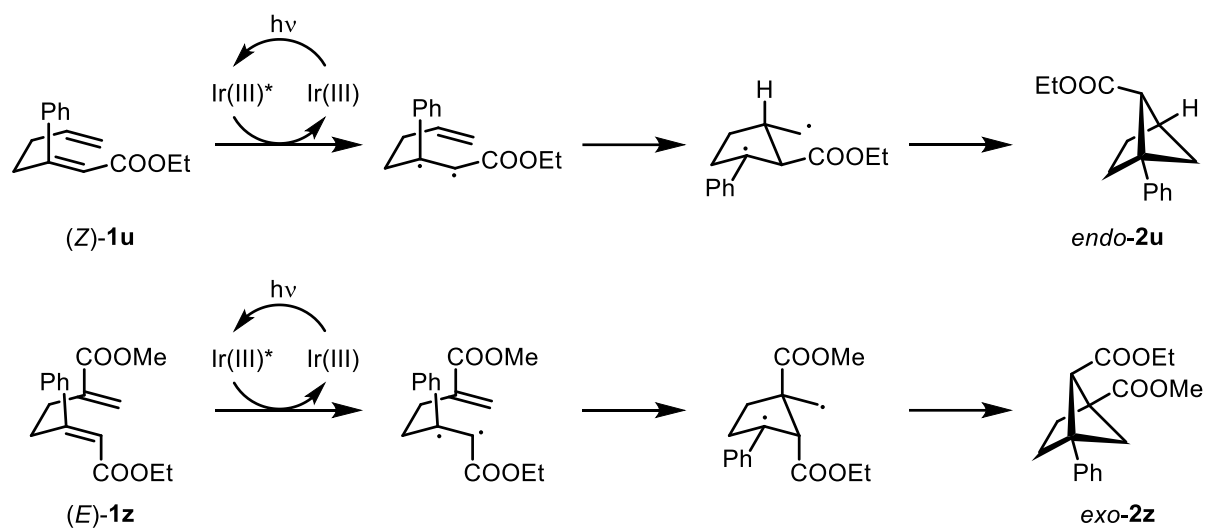**Scheme S1.** Proposed transition states for [2+2] crossed cycloadditions to BCHs 2u and 2z.



## 5 Overview of synthetic strategies to dienes 1

Many of the dienes **1** were prepared by similar synthetic routes. The main approaches that were used are summarized below.

### 1) Rongalite + Wittig Approach: Used for dienes **1a**, **1c**, **1f**, **1i**, **1j**, **1k**, **1l**, **1m**, **1n**, **1ab**

Reference: W. F. Jarvis, M. D. Hoey, A. L. Finocchio D. C. Dittmer, *J. Org. Chem.*, 1988, **53**, 5750–5756.

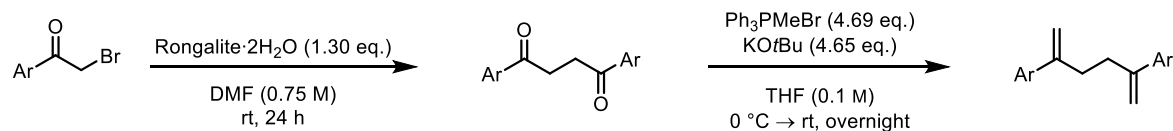

### 2) Lithiation Approach: Used for dienes **1d**, **1e**, **1g**, **1h**

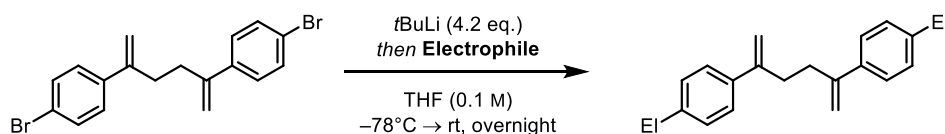

### 3) Conjugate addition + Wittig: Used for dienes **1s**, **1t**, **1x**

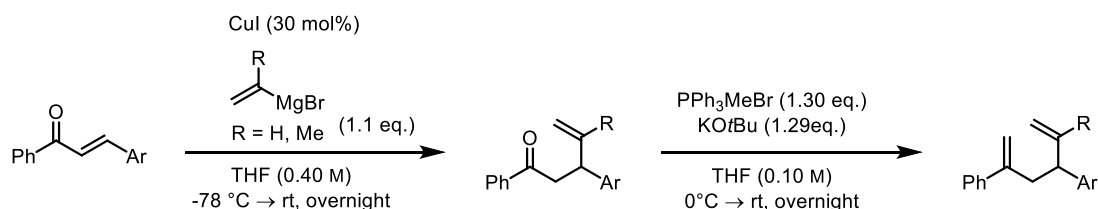

### 4) Enolate allylation: Used for dienes (+)-**1r**, **1v**, **1z**

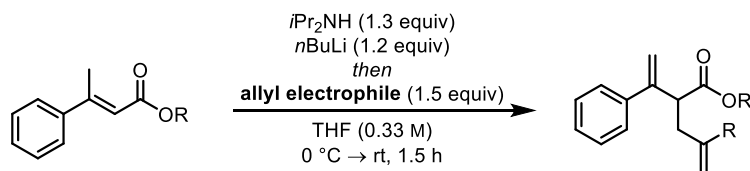

### 5) 1,2-addition of allyl nucleophiles: Used for dienes **1q**, **1w**, **1aa**

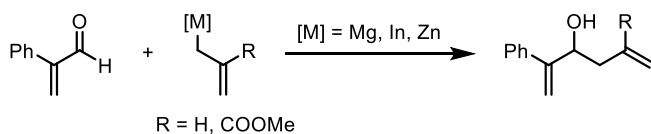

**Scheme S2.** Overview of synthetic strategies to dienes **1**.

## 6. Synthesis procedures

### 6.1 General Procedures

#### General Procedure 1 (GP1): [2+2] Cycloaddition

A 10 mL Schlenk tube was charged with the given diene (0.200 mmol, 1.00 eq.),  $[\text{Ir}\{\text{df}(\text{CF}_3)\text{ppy}\}_2(\text{dtbbpy})]\text{PF}_6$  (11.2 mg, 10.0  $\mu\text{mol}$ , 5 mol%), and THF (2 mL, 0.1 M) and subsequently deoxygenated by three freeze-pump-thaw cycles (30 minutes each). The reaction was irradiated with 456 nm LEDs for 22 hours (or as indicated) at room temperature under strong stirring. The reaction was concentrated *in vacuo* and directly purified by flash column chromatography ( $\text{SiO}_2$ ) to afford the title compound(s).

### 6.2 Synthesis of dienes 1a–z

#### Petatis reagent

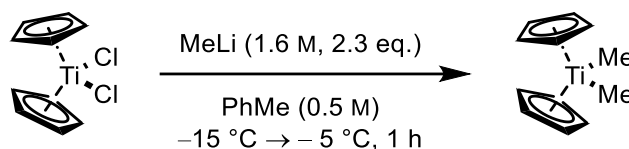

A suspension of titanocene dichloride (498 mg, 2.00 mmol, 1.00 eq.) in PhMe (4 mL, 0.5 M) was cooled to  $-15\text{ }^\circ\text{C}$ . MeLi (1.6 M in  $\text{Et}_2\text{O}$ , 2.9 mL, 4.6 mmol, 2.3 eq.) was added dropwise over five minutes and the reaction was stirred for one hour at  $-5\text{ }^\circ\text{C}$ . The solution was warmed to  $0\text{ }^\circ\text{C}$  and ice cold  $\text{NH}_4\text{Cl}$  (6%, aq., 1.3 mL) was added dropwise over two minutes. The reaction was diluted with PhMe (5 mL), washed with water (1 mL) and brine (1 mL), dried over anhydrous  $\text{Na}_2\text{SO}_4$ , filtered, and concentrated under reduced pressure to approximately one third of its initial volume to afford the title compound as an orange solution (0.57 M in PhMe). The concentration of the solution was determined by  $^1\text{H}$  NMR spectroscopy using PhMe as internal standard.

Data were consistent with that reported in literature.<sup>9</sup>

$^1\text{H}$  NMR (300 MHz,  $\text{CDCl}_3$ ):  $\delta/\text{ppm} = 6.05$  (s, 10H),  $-0.11$  (s, 6H).

$^{13}\text{C}\{^1\text{H}\}$  NMR (101 MHz,  $\text{CDCl}_3$ ):  $\delta/\text{ppm} = 113.2$  (10 C), 45.7 (2C).

**1,4-Diphenylbutane-1,4-dione (S1)**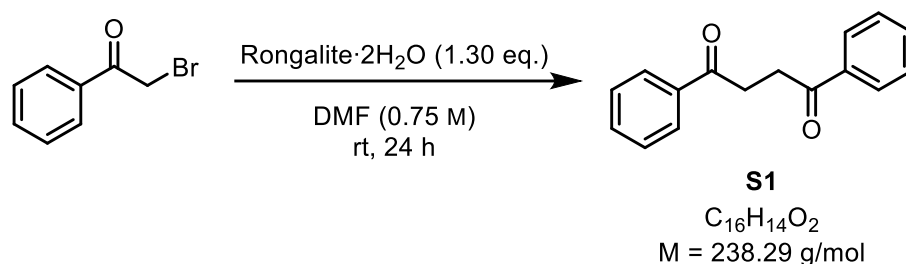

DMF (20 mL, 0.75 M) was added to a flask charged with 2-bromacetophenone (3.00 g, 15.1 mmol, 1.00 eq.) and Rongalite·2H<sub>2</sub>O (3.02 g, 19.6 mmol, 1.30 eq.) and the suspension was stirred for 24 hours at room temperature. The reaction mixture was poured into ice cold water (50 mL) and the precipitated solid was filtered off and redissolved in CH<sub>2</sub>Cl<sub>2</sub> (50 mL). After washing with NaOH (1 M, aq., 50 mL) and brine (50 mL) the organic phase was dried over anhydrous Na<sub>2</sub>SO<sub>4</sub>, filtered and concentrated *in vacuo* to afford the title compound as colourless solid (1.47 g, 6.17 mmol, 81%).

Data were consistent with that reported in literature.<sup>10</sup>

**M.P.** = 141–142 °C (CH<sub>2</sub>Cl<sub>2</sub>)

**<sup>1</sup>H NMR** (300 MHz, CDCl<sub>3</sub>): δ/ppm = 8.06–8.04 (m, 4H), 7.61–7.56 (m, 2H), 7.51–7.46 (m, 4H), 3.47 (s, 4H).

**<sup>13</sup>C{<sup>1</sup>H} NMR** (101 MHz, CDCl<sub>3</sub>): δ/ppm = 198.8 (2C), 136.9 (2C), 133.3 (2C), 128.8 (4C), 128.3 (4C), 32.7 (2C).

**Hexa-1,5-diene-2,5-diylidibenzene (1a)**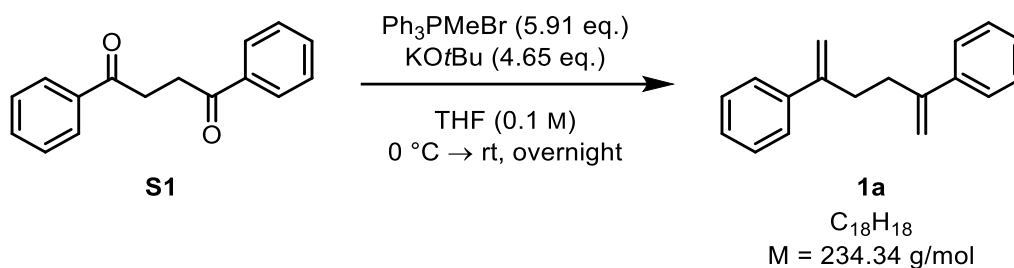

THF (13 mL, 0.1 M) was added to a flask charged with  $\text{Ph}_3\text{PMeBr}$  (2.11 g, 5.91 mmol, 4.69 eq.) and  $\text{KOtBu}$  (658 mg, 5.86 mmol, 4.65 eq.). The suspension was stirred for one hour at room temperature and then cooled down to  $0\text{ }^\circ\text{C}$ . Diketone **S1** (300 mg, 1.26 mmol, 1.00 eq.) was added in one portion. The reaction mixture was warmed to room temperature and stirred overnight. The reaction was quenched by slow addition of  $\text{NH}_4\text{Cl}$  (sat., aq. 10 mL) and the aqueous phase was extracted with  $\text{EtOAc}$  ( $3 \times 15\text{ mL}$ ). The combined organic phases were washed with brine (10 mL), dried over anhydrous  $\text{Na}_2\text{SO}_4$ , filtered, and concentrated *in vacuo* before being purified by flash column chromatography ( $\text{SiO}_2$ , Pentane) to afford the title compound as white solid (274 mg, 1.17 mmol, 93%).

$R_f = 0.55$  (Pentane).

**M.P.** =  $43\text{--}45\text{ }^\circ\text{C}$  (Pentane)

**$^1\text{H NMR}$**  (300 MHz,  $\text{CDCl}_3$ ):  $\delta/\text{ppm} = 7.41\text{--}7.29$  (m, 10H), 5.28 (d,  $J = 1.38\text{ Hz}$ , 2H), 5.05 (s, 2H), 2.65 (s, 4H).

**$^{13}\text{C}\{^1\text{H}\}$  NMR** (101 MHz,  $\text{CDCl}_3$ ):  $\delta/\text{ppm} = 148.2$  (2C), 141.3 (2C), 128.4 (4C), 127.5 (2C), 126.3 (4C), 112.7 (2C), 34.4 (2C).

**IR** (ATR):  $\nu_{\text{max}} = 1623, 1574, 1493, 1443, 1409, 1324, 1309, 1071, 1027, 891, 775, 699, 549, 504\text{ cm}^{-1}$ .

**GCMS** (EI): calculated for  $\text{C}_{18}\text{H}_{18}^+$   $[\text{M}]^+$ : 234.1; found: 234.1.

**1-Phenylpent-4-en-1-one (S2)**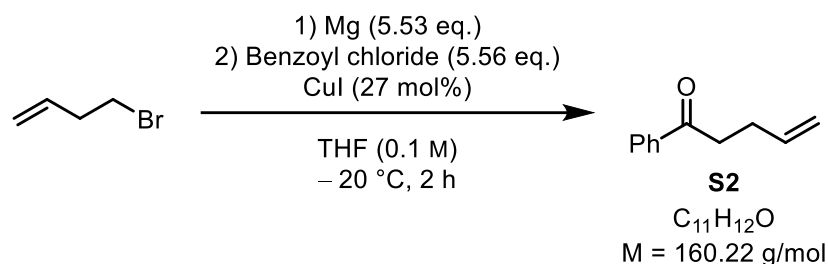

THF (2 mL, 8 M) was added to a flask charged with magnesium turnings (397 mg, 16.3 mmol, 5.53 eq.) and a grain of iodine. A solution of 4-bromo-1-butene (398 mg, 2.95 mmol, 1.00 eq.) in THF (18 mL, 0.2 M) was added dropwise over 10 minutes and the suspension was stirred for one hour at room temperature. In a second flask, THF (17 mL, 1 M) was cooled to -20 °C and benzoyl chloride (1.9 mL, 16 mmol, 5.6 eq.) and CuI (152 mg, 0.798 mmol, 27.1 mol%) were added and the mixture was stirred for 10 minutes. The Grignard reagent solution was added dropwise over one hour at -20 °C and the reaction mixture was then stirred for a further two hours at -20 °C. HCl (1 M, aq., 20 mL) was added and the aqueous phase was extracted with CH<sub>2</sub>Cl<sub>2</sub> (3 × 30 mL). The combined organic phases were washed with NaHCO<sub>3</sub> (sat., aq., 20 mL) and brine (10 mL), dried over anhydrous Na<sub>2</sub>SO<sub>4</sub>, filtered, and concentrated *in vacuo* before being purified by flash column chromatography (SiO<sub>2</sub>, 99:1 Pentane:EtOAc) to afford the title compound as a pale green oil (2.11 g, 13.2 mmol, 78%).

Data were consistent with that reported in literature.<sup>11</sup>

*R<sub>f</sub>* = 0.32 (99:1 Pentane:EtOAc).

<sup>1</sup>H NMR (300 MHz, CDCl<sub>3</sub>): δ/ppm = 7.98–7.96 (m, 2H), 7.61–7.54 (m, 1H), 7.49–7.44 (m, 2H), 5.98–5.84 (m, 1H), 5.13–4.99 (m, 2H), 3.11–3.06 (m, 2H), 2.54–2.47 (m, 2H).

<sup>13</sup>C{<sup>1</sup>H} NMR (101 MHz, CDCl<sub>3</sub>): δ/ppm = 199.6 (1C), 137.4 (1C), 137.1 (1C), 133.2 (1C), 128.7 (2C), 128.2 (2C), 115.4 (1C), 37.9 (1C), 28.3 (1C).

**Hexa-1,5-dien-2-ylbenzene (1b)**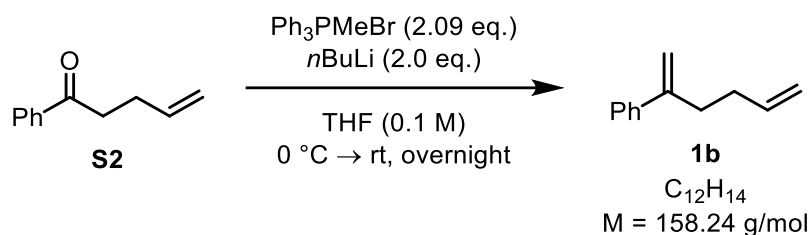

At room temperature  $n\text{BuLi}$  (2.5 M in hexane, 1.5 mL, 3.8 mmol, 2.0 eq.) was added slowly to a solution of  $\text{Ph}_3\text{PMeBr}$  (1.41 g, 3.95 mmol, 2.09 eq.) in THF (18 mL, 0.1 M). After stirring for one hour, the solution was cooled to  $0\text{ }^\circ\text{C}$  and ketone **S2** (303 mg, 1.89 mmol, 1.00 eq.) was added in one portion. The reaction mixture was warmed to room temperature and stirred overnight.  $\text{NH}_4\text{Cl}$  (sat., aq., 15 mL) was added and the aqueous phase was extracted with  $\text{Et}_2\text{O}$  ( $3 \times 15\text{ mL}$ ). The combined organic phases were washed with brine (10 mL) and concentrated under reduced pressure (850 mbar,  $40\text{ }^\circ\text{C}$  water bath). Purification by flash column chromatography ( $\text{SiO}_2$ , Pentane) afforded the title compound as a colourless oil (225 mg, 1.42 mmol, 75%).

CAUTION: Product proved to be volatile at low pressures.

Data were consistent with that reported in literature.<sup>12</sup>

$R_f = 0.38$  (Pentane).

$^1\text{H NMR}$  (300 MHz,  $\text{CDCl}_3$ ):  $\delta/\text{ppm} = 7.42\text{--}7.27$  (m, 5H), 5.91–5.78 (m, 1H), 5.29 (s, 1H), 5.08–4.96 (m, 3H), 2.63–2.58 (m, 2H), 2.26–2.18 (m, 2H).

$^{13}\text{C}\{^1\text{H}\}$  NMR (101 MHz,  $\text{CDCl}_3$ ):  $\delta/\text{ppm} = 148.0$  (1C), 141.3 (1C), 138.2 (1C), 128.3 (2C), 127.4 (1C), 126.2 (2C), 114.7 (1C), 112.5 (1C), 34.8 (1C), 32.5 (1C).

**2-Bromo-1-(4-(trifluoromethyl)phenyl)ethan-1-one (S3)**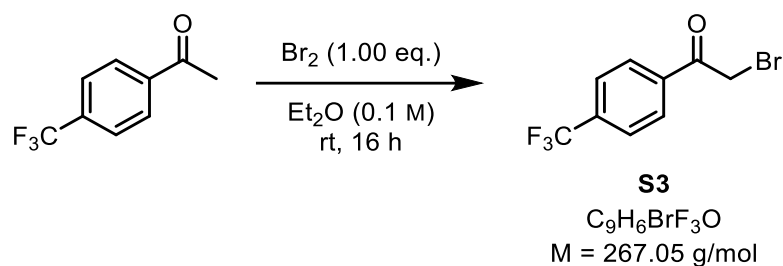

4-Trifluoromethyl acetophenone (3.76 g, 20.0 mmol, 1.00 eq.) was dissolved in Et<sub>2</sub>O (30 mL, 0.1 M). Bromine (1.0 mL, 20 mmol, 1.0 eq.) was added dropwise over two minutes at room temperature and the reaction mixture was stirred for 12 hours. The reaction was diluted with water (20 mL) and the aqueous phase was extracted with Et<sub>2</sub>O (2 × 20 mL). The combined organic phases were washed with NaHCO<sub>3</sub> (sat., aq., 30 mL), Na<sub>2</sub>S<sub>2</sub>O<sub>3</sub> (sat., aq., 30 mL) and brine (30 mL), dried over anhydrous Na<sub>2</sub>SO<sub>4</sub>, filtered, and concentrated *in vacuo*. After purification by recrystallization from a hot mixture of CHCl<sub>3</sub> and pentane (3:1) the title compound was obtained as colourless crystals (2.37 g, 8.87 mmol, 44%).

Data were consistent with that reported in literature.<sup>13</sup>

**M.P.** = 47–49 °C (3:1 CHCl<sub>3</sub>:Pentane)

**<sup>1</sup>H NMR** (300 MHz, CDCl<sub>3</sub>): δ/ppm = 8.12–8.09 (m, 2H), 7.79–7.76 (m, 2H), 4.45 (s, 2H).

**<sup>13</sup>C{<sup>1</sup>H} NMR** (101 MHz, CDCl<sub>3</sub>): δ/ppm = 190.6, 136.8, 135.5, 129.5 (2C), 126.0 (q, *J* = 3.6 Hz, 2C), 124.9, 30.4.

**<sup>19</sup>F{<sup>1</sup>H} NMR** (282 MHz, CDCl<sub>3</sub>): δ/ppm = 63.28.

**IR** (ATR): ν<sub>max</sub> = 3063, 3024, 2997, 2947, 1694, 1509, 1413, 1326, 1314, 1277, 1164, 1111, 1066, 1013, 992, 825, 706, 647, 595 cm<sup>-1</sup>.

**GCMS** (EI): calculated for C<sub>9</sub>H<sub>6</sub>BrF<sub>3</sub>O<sup>+</sup> [M]<sup>+</sup>: 266.0; found: 265.9.

**1,4-Bis(4-(trifluoromethyl)phenyl)butane-1,4-dione (S4)**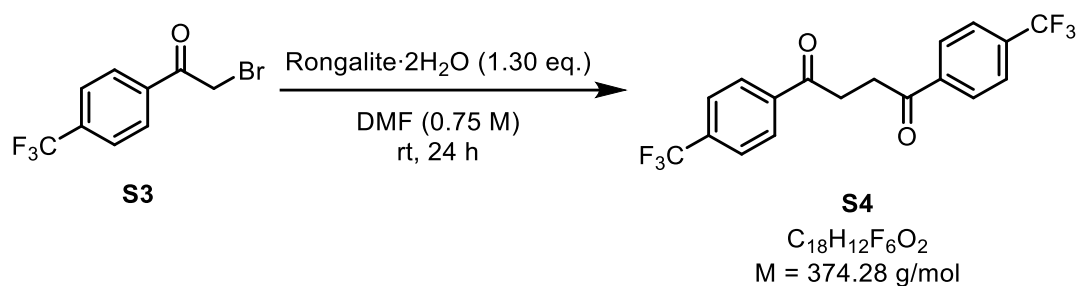

DMF (10 mL, 0.75 M) was added to a flask charged with acetophenone **S3** (2.00 g, 7.49 mmol, 1.00 eq.) and Rongalite·2H<sub>2</sub>O (1.50 g, 9.74 mmol, 1.30 eq.) and the suspension was stirred for 24 hours at room temperature. After addition of water (26 mL), the precipitate was filtered off and redissolved in CH<sub>2</sub>Cl<sub>2</sub> (26 mL). The organic phase was washed with NaOH (1 M, aq., 26 mL) and brine (26 mL), dried over anhydrous Na<sub>2</sub>SO<sub>4</sub>, filtered, and concentrated *in vacuo* to afford the title compound as pale yellow crystals (1.07 g, 2.87 mmol, 76%).

**M.P.** = 130–133 °C (CH<sub>2</sub>Cl<sub>2</sub>)

**<sup>1</sup>H NMR** (300 MHz, CDCl<sub>3</sub>): δ/ppm = 8.16–8.13 (m, 4H), 7.78–7.75 (m, 4H), 3.50 (s, 4H).

**<sup>13</sup>C{<sup>1</sup>H} NMR** (101 MHz, CDCl<sub>3</sub>): δ/ppm = 197.6 (2C), 139.4 (2C), 134.6 (2C), 128.6 (8C), 125.9 (q, *J* = 3.6 Hz, 2C), 32.9 (2C).

**<sup>19</sup>F{<sup>1</sup>H} NMR** (282 MHz, CDCl<sub>3</sub>): δ/ppm = 63.13.

**IR** (ATR): ν<sub>max</sub> = 2942, 2912, 1682, 1582, 1509, 1408, 1315, 1170, 1129, 1107, 1064, 1004, 866, 851, 792, 731, 600, 520 cm<sup>-1</sup>.

**HRMS** (ESI): calculated for C<sub>18</sub>H<sub>12</sub>O<sub>2</sub>F<sub>6</sub>Na<sup>+</sup> [M+Na]<sup>+</sup>: 397.0634; found: 397.0635.



**4,4'-(Hexa-1,5-diene-2,5-diyl)bis((trifluoromethyl)benzene) (1c)**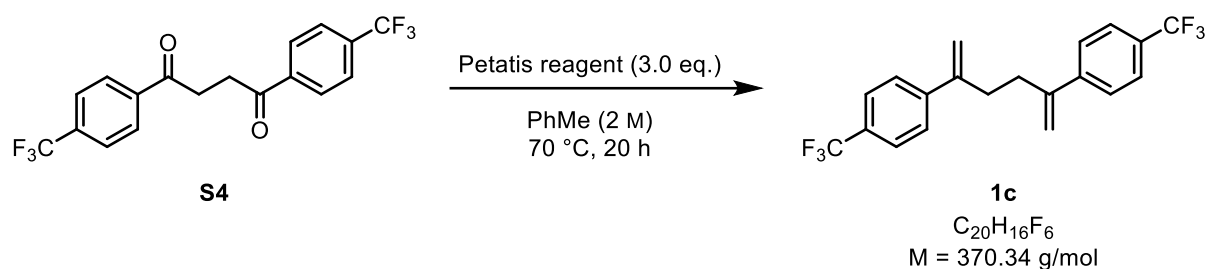

To a flask charged with diketone **S4** (108 mg, 0.300 mmol, 1.00 eq.) Petatis reagent (0.57 M in PhMe, 1.6 mL, 9.1 mmol, 3.0 eq.) was added and the solution was stirred for 20 h at 70 °C. The reaction mixture was diluted with pentane (5 mL), filtered over Celite<sup>®</sup>, and concentrated *in vacuo* before being purified by flash column chromatography (SiO<sub>2</sub>, Pentane) to afford the title compound as a colourless solid (38 mg, 0.103 mmol, 34%).

$R_f = 0.36$  (Pentane).

**M.P.** = 58–59 °C

**<sup>1</sup>H NMR** (300 MHz, CDCl<sub>3</sub>):  $\delta$ /ppm = 7.49–7.56 (m, 4H), 7.46–7.43 (m, 4H), 5.33 (s, 2H), 5.12 (s, 2H), 2.65 (s, 4H).

**<sup>13</sup>C{<sup>1</sup>H} NMR** (101 MHz, CDCl<sub>3</sub>):  $\delta$ /ppm = 146.8 (2C), 144.7 (2C), 128.6 (2C), 126.6 (8C), 125.9 (q,  $J = 125.5$  Hz, 2C), 125.4 (2C), 115.0 (2C), 34.0 (2C).

**<sup>19</sup>F{<sup>1</sup>H} NMR** (282 MHz, CDCl<sub>3</sub>):  $\delta$ /ppm = 62.51.

**IR** (ATR):  $\nu_{\text{max}} = 2923, 1615, 1402, 1335, 1169, 1137, 1121, 1094, 1068, 1013, 914, 907, 850, 680, 601 \text{ cm}^{-1}$ .

**GCMS** (EI): calculated for C<sub>20</sub>H<sub>16</sub>F<sub>6</sub><sup>+</sup> [M]<sup>+</sup>: 370.1; found: 370.0.

**4,4'-(Hexa-1,5-diene-2,5-diyl)dibenzaldehyde (1d)**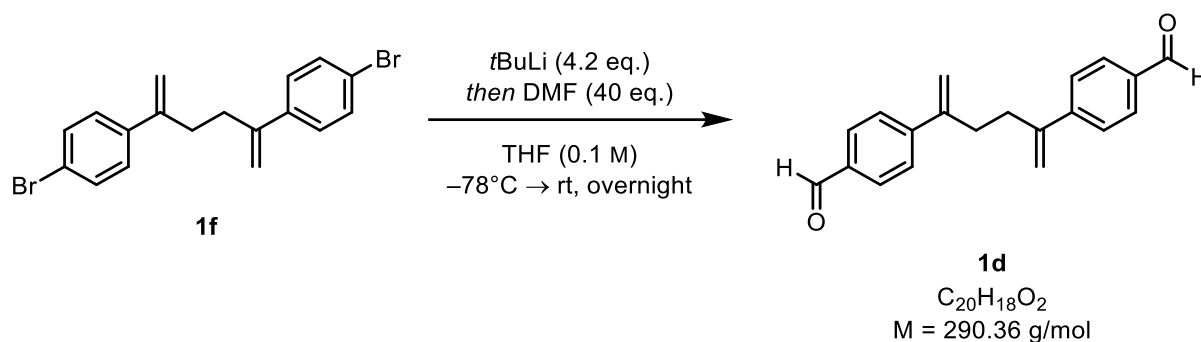

A solution of diene **1f** (300 mg, 0.765 mmol, 1.00 eq.) in THF (7 mL, 0.1 M) was cooled to -78 °C. Under stirring, *t*BuLi (1.6 M in Pentane, 2.0 mL, 3.2 mmol, 4.2 eq.) was added dropwise over 15 minutes. After stirring for one hour at -78 °C, dry DMF (2.4 mL, 31 mmol, 40 eq.) was added dropwise over 30 minutes. The suspension was allowed to warm to room temperature overnight. The reaction was neutralised by dropwise addition of NH<sub>4</sub>Cl (sat., aq., 7 mL), diluted with water (20 mL), and the aqueous phase was extracted with Et<sub>2</sub>O (3 × 15 mL). The combined organic phases were washed with HCl (1 M, aq., 10 mL), water (10 mL) and brine (10 mL), dried over anhydrous Na<sub>2</sub>SO<sub>4</sub>, filtered, and concentrated *in vacuo* before being purified by flash column chromatography (SiO<sub>2</sub>, 6:1 Pentane:EtOAc) to afford the title compound as a white powder (118 mg, 0.407 mmol, 53%).

Data were consistent with that reported in literature.<sup>14</sup>

*R<sub>f</sub>* = 0.38 (6:1 Pentane:EtOAc).

**M.P.** = 90–91 °C (CH<sub>2</sub>Cl<sub>2</sub>)

**<sup>1</sup>H NMR** (300 MHz, CDCl<sub>3</sub>): δ/ppm = 10.0 (s, 2H), 7.86–7.83 (m, 4H), 7.53–7.50 (m, 4H), 5.41 (s, 2H), 5.16 (s, 2H), 2.68 (s, 4H).

**<sup>13</sup>C{<sup>1</sup>H} NMR** (101 MHz, CDCl<sub>3</sub>): δ/ppm = 191.9 (2C), 174.2 (2C), 174.0 (2C), 135.6 (2C), 130.0 (4C), 126.8 (4C), 115.8 (2C), 34.0 (2C).

**IR** (ATR): ν<sub>max</sub> = 2927, 2826, 2734, 1693, 1602, 1562, 1386, 1306, 1213, 1166, 1084, 911, 837, 744, 715, 575, 504 cm<sup>-1</sup>.

**HRMS** (ESI): calculated for C<sub>20</sub>H<sub>18</sub>O<sub>2</sub>Na<sup>+</sup> [M+Na]<sup>+</sup>: 313.1199; found: 313.1201.

**2,2'-(Hexa-1,5-diene-2,5-diylbis(4,1-phenylene))bis(4,4,5,5-tetramethyl-1,3,2-dioxaborolane) (1e)**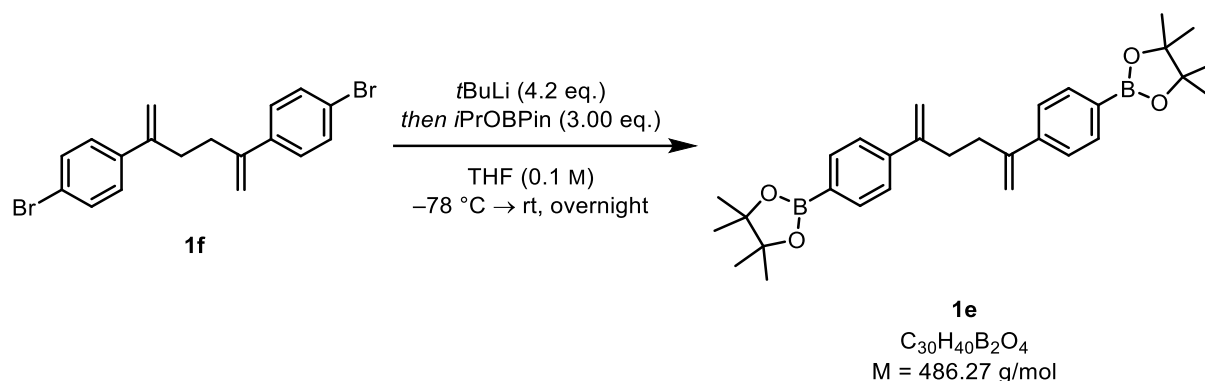

A solution of diene **1f** (400 mg, 1.02 mmol, 1.00 eq.) in THF (10 mL, 0.1 M) was cooled to  $-78\text{ }^{\circ}\text{C}$ . Under stirring, *t*BuLi (1.6 M in Pentane, 2.7 mL, 4.3 mmol, 4.2 eq.) was added dropwise over 15 minutes and the reaction was stirred for one hour at  $-78\text{ }^{\circ}\text{C}$ . In a second flask, a solution of isopropylpinacolylborate (570 mg, 3.06 mmol, 3.00 eq.) in THF (3 mL, 1 M) was cooled to  $-78\text{ }^{\circ}\text{C}$ . The suspension of lithiated **1f** was added dropwise over 30 minutes to the borate solution. The reaction was allowed to warm to room temperature and was stirred overnight. The reaction was neutralised by dropwise addition of  $\text{NH}_4\text{Cl}$  (sat., aq., 10 mL). The aqueous phase was extracted with EtOAc ( $3 \times 10\text{ mL}$ ) and the combined organic phases were washed with Brine (10 mL), dried over anhydrous  $\text{Na}_2\text{SO}_4$ , filtered, and concentrated *in vacuo* before being purified by flash column chromatography ( $\text{SiO}_2$ , 20:1 Pentane:EtOAc) to afford the title compound as white solid (115 mg, 0.236 mmol, 23%).

$R_f = 0.26$  (20:1 Pentane:EtOAc).

**M.P.** =  $127\text{--}130\text{ }^{\circ}\text{C}$

**$^1\text{H}$  NMR** (300 MHz,  $\text{CDCl}_3$ ):  $\delta/\text{ppm} = 7.79\text{--}7.76$  (m, 4H),  $7.40\text{--}7.37$  (m, 4H),  $5.31\text{--}5.30$  (m, 2H),  $5.04$  (m, 2H),  $2.63$  (s, 4H),  $1.35$  (s, 24H).

**$^{13}\text{C}\{^1\text{H}\}$  NMR** (101 MHz,  $\text{CDCl}_3$ ):  $\delta/\text{ppm} = 148.1$  (2C),  $144.0$  (2C),  $135.0$  (4C),  $127.9$  (2C),  $125.7$  (4C),  $113.5$  (2C),  $83.9$  (4C),  $34.3$  (2C),  $25.0$  (8C).

**$^{11}\text{B}$  NMR** (161 MHz,  $\text{CDCl}_3$ ):  $\delta/\text{ppm} = 30.96$ .

**IR** (ATR):  $\nu_{\text{max}} = 3901, 3851, 3838, 3750, 3734, 3647, 3081, 2979, 2361, 1610, 1545, 1516, 1399, 1361, 1323, 1268, 1146, 1099, 1018, 961, 897, 860, 660\text{ cm}^{-1}$ .

**HRMS** (ESI): calculated for  $\text{C}_{30}\text{H}_{40}\text{B}_2\text{O}_4\text{Na}^+$   $[\text{M}+\text{Na}]^+$ : 509.3042; found: 509.3041.

**1,4-Bis(4-bromophenyl)butane-1,4-dione (S5)**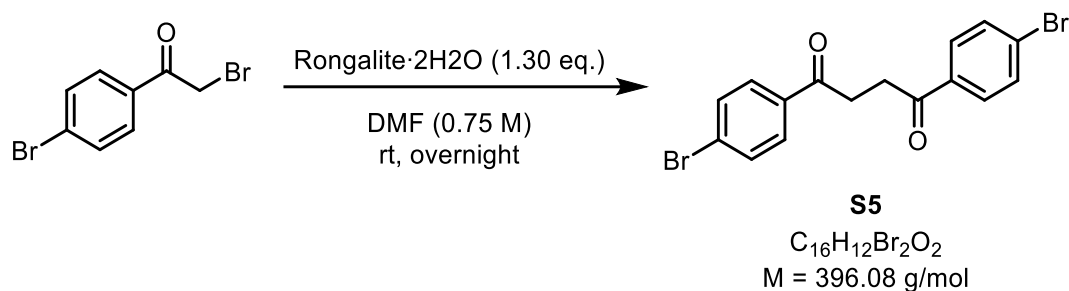

DMF (30 mL, 0.75 M) was added to a flask charged with 4-bromophenacyl bromide (6.00 g, 21.6 mmol, 1.00 eq.) and Rongalite·2H<sub>2</sub>O (3.31 g, 28.1 mmol, 1.30 eq.) at room temperature. The suspension was stirred overnight and poured in ice water (120 mL). The participate was filtered off and redissolved in CHCl<sub>3</sub> (120 mL). The organic phase was washed with NaOH (1 M, aq., 100 mL), dried over anhydrous Na<sub>2</sub>SO<sub>4</sub>, filtered, and concentrated *in vacuo*. After recrystallization from a hot mixture of CHCl<sub>3</sub> and Pentane (4:1, 85 mL) the title compound was obtained as colourless crystals (2.81 g, 7.09 mmol, 66%).

CAUTION: the obtained product is only soluble in CHCl<sub>3</sub>.

Data were consistent with that reported in literature.<sup>10</sup>

**M.P.** = 115–117 °C (4:1 CHCl<sub>3</sub>:Pentane)

**<sup>1</sup>H NMR** (300 MHz, CDCl<sub>3</sub>): δ/ppm = 7.92–7.84 (m, 4H), 7.66–7.60 (m, 4H), 3.41 (s, 4H).

**<sup>13</sup>C{<sup>1</sup>H} NMR** (101 MHz, CDCl<sub>3</sub>): δ/ppm = 197.7 (2C), 135.5 (2C), 132.1 (4C), 129.8 (4C), 128.6 (2C), 32.6 (2C).

**4,4'-(Hexa-1,5-diene-2,5-diyl)bis(bromobenzene) (1f)**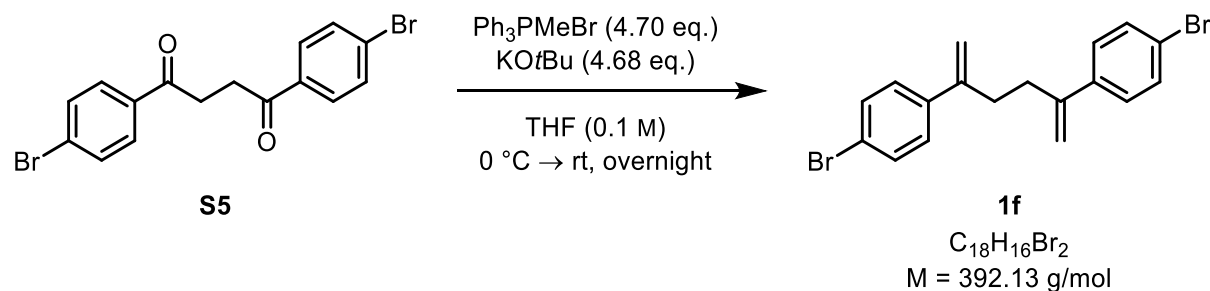

THF (30 mL, 0.1 M) was added to a flask charged with  $\text{Ph}_3\text{PMeBr}$  (10.2 g, 28.5 mmol, 4.70 eq.) and  $\text{KOtBu}$  (3.13 g, 27.9 mmol, 4.60 eq.). After stirring for one hour at room temperature, the suspension was cooled to  $0\text{ }^\circ\text{C}$ . Diketone **S10** (2.40 g, 6.06 mmol, 1.00 eq.) was added in one portion. The reaction mixture was warmed to room temperature and stirred overnight.  $\text{NH}_4\text{Cl}$  (sat., aq. 30 mL) was added slowly and the reaction mixture was diluted with water (20 mL). The aqueous phase was extracted with  $\text{EtOAc}$  ( $3 \times 20\text{ mL}$ ) and the combined organic phases were washed with brine (20 mL). The organic phase was dried over anhydrous  $\text{Na}_2\text{SO}_4$ , filtered, and concentrated *in vacuo* before being purified by flash column chromatography ( $\text{SiO}_2$ , 99:1 Pentane: $\text{EtOAc}$ ) to afford the title compound as a white solid (2.24 g, 5.71 mmol, 94%).

CAUTION: the purification needs to be carried out fast, since the product starts to crystallise on the column.

Data were consistent with that reported in literature.<sup>15</sup>

$R_f = 0.51$  (99:1 Pentane: $\text{EtOAc}$ ).

**M.P.** =  $80\text{--}81\text{ }^\circ\text{C}$  ( $\text{CH}_2\text{Cl}_2$ )

$^1\text{H NMR}$  (300 MHz,  $\text{CDCl}_3$ ):  $\delta/\text{ppm} = 7.46\text{--}7.43$  (m, 4H),  $7.24\text{--}7.21$  (m, 4H),  $5.26$  (s, 2H),  $5.03$  (s, 2H),  $2.58$  (s, 4H).

$^{13}\text{C}\{^1\text{H}\}$  NMR (101 MHz,  $\text{CDCl}_3$ ):  $\delta/\text{ppm} = 146.9$  (2C),  $140.0$  (2C),  $131.6$  (4C),  $128.0$  (4C),  $121.5$  (2C),  $113.6$  (2C),  $34.1$  (2C).

**IR** (ATR):  $\nu_{\text{max}} = 3103, 2920, 2843, 1623, 1484, 1388, 1323, 1118, 1092, 1069, 1004, 899, 835, 757, 733, 503\text{ cm}^{-1}$ .

**GCMS** (EI): calculated for  $\text{C}_{18}\text{H}_{16}\text{Br}_2^+$   $[M]^+$ : 390.0; found: 389.9.

**(Hexa-1,5-diene-2,5-diylbis(4,1-phenylene))bis(trimethylsilane) (1g)**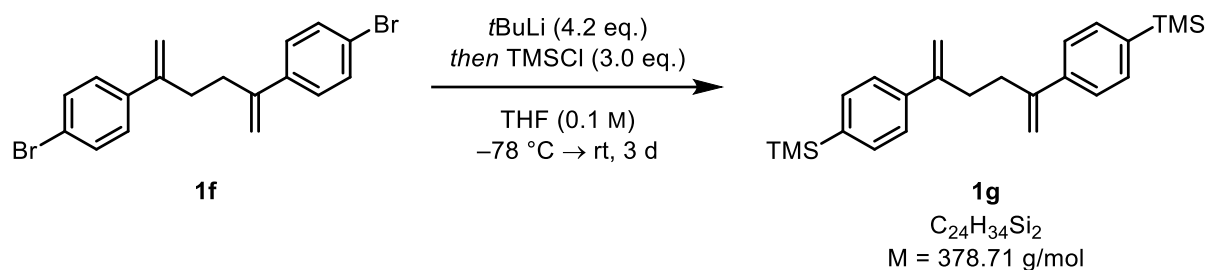

A solution of diene **1f** (400 mg, 1.02 mmol, 1.00 eq.) in THF (10 mL, 0.1 M) was cooled to  $-78\text{ }^{\circ}\text{C}$ . Under stirring, *t*BuLi (1.6 M in Pentane, 2.7 mL, 4.3 mmol, 4.2 eq.) was added dropwise over 15 minutes. After stirring for one hour at  $-78\text{ }^{\circ}\text{C}$ , TMSCl (freshly distilled from  $\text{CaH}_2$ , 0.39 mL, 3.1 mmol, 3.0 eq.) was added dropwise over one minute. The reaction was allowed to warm to room temperature and was stirred for three days. The reaction was neutralised by dropwise addition of  $\text{NH}_4\text{Cl}$  (sat., aq., 10 mL). The aqueous phase was extracted with EtOAc ( $3 \times 10\text{ mL}$ ) and the combined organic phases were washed with Brine (10 mL), dried over anhydrous  $\text{Na}_2\text{SO}_4$ , filtered, and concentrated *in vacuo* before being purified by flash column chromatography ( $\text{SiO}_2$ , Pentane) to afford the title compound as colourless crystals (281 mg, 0.743 mmol, 73%).

$R_f = 0.26$  (Pentane).

**M.P.** =  $57\text{--}59\text{ }^{\circ}\text{C}$  ( $\text{CH}_2\text{Cl}_2$ )

**$^1\text{H NMR}$**  (300 MHz,  $\text{CDCl}_3$ ):  $\delta/\text{ppm} = 7.50\text{--}7.47$  (m, 4H), 7.39–7.36 (m, 4H), 5.31 (s, 2H), 5.06 (s, 2H), 2.65 (s, 4H),  $-0.27$  (s, 18H).

**$^{13}\text{C}\{^1\text{H}\}$  NMR** (101 MHz,  $\text{CDCl}_3$ ):  $\delta/\text{ppm} = 148.1$  (2C), 141.6 (2C), 139.6 (2C), 133.5 (4C), 125.6 (4C), 112.8 (2C), 34.3 (2C),  $-0.96$  (6C).

**$^{29}\text{Si NMR}$**  (99 MHz,  $\text{CDCl}_3$ ):  $\delta/\text{ppm} = -4.25$ .

**IR** (ATR):  $\nu_{\text{max}} = 3065, 3015, 2954, 2896, 1627, 1597, 1389, 1246, 1125, 1115, 1086, 905, 898, 839, 824, 764, 752, 734, 694, 660, 637, 624, 515\text{ cm}^{-1}$ .

**HRMS** (ESI): calculated for  $\text{C}_{24}\text{H}_{34}\text{Si}_2\text{Na}^+$  [ $\text{M}+\text{Na}$ ] $^+$ : 401.2091; found: 401.2101.

**2,2'-(Hexa-1,5-diene-2,5-diylbis(4,1-phenylene))bis(propan-2-ol) (1h)**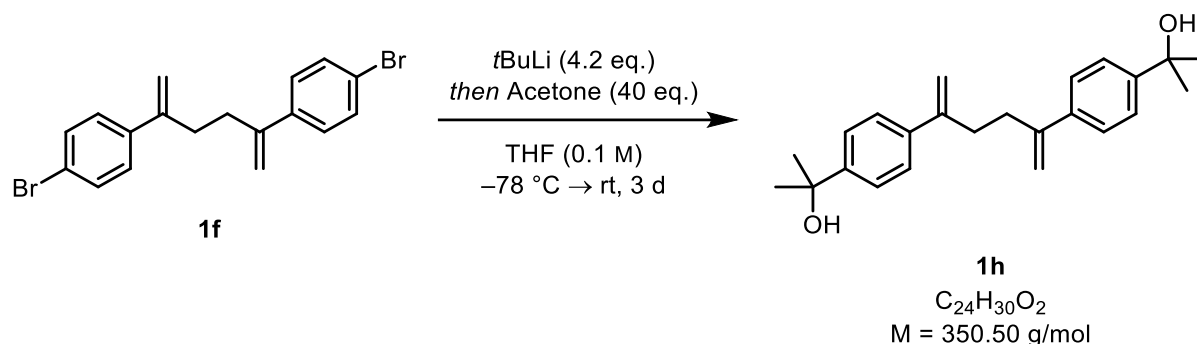

A solution of diene **1f** (400 mg, 1.02 mmol, 1.00 eq.) in THF (10 mL, 0.1 M) was cooled to  $-78\text{ }^{\circ}\text{C}$ . Under stirring,  $t\text{BuLi}$  (1.6 M in Pentane, 2.7 mL, 4.3 mmol, 4.2 eq.) was added dropwise over 15 minutes. After stirring for one hour at  $-78\text{ }^{\circ}\text{C}$ , dry acetone (3.0 mL, 40 mmol, 40 eq.) was added dropwise over one minute. The reaction was allowed to warm to room temperature and stirred for three days. The reaction was neutralised by dropwise addition of  $\text{NH}_4\text{Cl}$  (sat., aq., 5 mL) and diluted with water (20 mL). The aqueous phase was extracted with  $\text{EtOAc}$  ( $3 \times 10\text{ mL}$ ) and the combined organic phases were washed with brine (10 mL). The organic phase was dried over anhydrous  $\text{Na}_2\text{SO}_4$ , filtered, and concentrated *in vacuo*. After recrystallization from a mixture of hot  $\text{CHCl}_3$  and pentane (4:1), the participate was filtered off and washed with ice cold Pentane ( $3 \times 1\text{ mL}$ ) to afford the title compound as white solid (144 mg, 0.411 mmol, 40%).

**M.P.** =  $104\text{--}105\text{ }^{\circ}\text{C}$  (4:1  $\text{CHCl}_3$ :Pentane)

**$^1\text{H}$  NMR** (300 MHz,  $\text{CDCl}_3$ ):  $\delta/\text{ppm} = 7.46\text{--}7.43$  (m, 4H),  $7.38\text{--}7.35$  (m, 4H), 5.29 (s, 2H), 5.05 (s, 2H), 2.65 (s, 4H), 1.60 (s, 12H).

**$^{13}\text{C}\{\text{1H}\}$  NMR** (101 MHz,  $\text{CDCl}_3$ ):  $\delta/\text{ppm} = 148.4$  (2C), 147.7 (2C), 139.6 (2C), 126.1 (4C), 124.5 (4C), 112.5 (2C), 72.6 (2C), 34.4 (2C), 31.9 (4C).

**IR** (ATR):  $\nu_{\text{max}} = 3348, 3089, 3030, 2973, 2929, 1909, 1797, 1626, 1507, 1457, 1361, 1255, 1168, 1139, 1124, 1096, 1013, 955, 900, 864, 843, 755, 689, 555\text{ cm}^{-1}$ .

**HRMS** (ESI): calculated for  $\text{C}_{24}\text{H}_{30}\text{O}_2\text{Na}^+$   $[\text{M}+\text{Na}]^+$ : 373.2138; found: 373.2138.

**1,4-Di-*p*-tolylbutane-1,4-dione (S6)**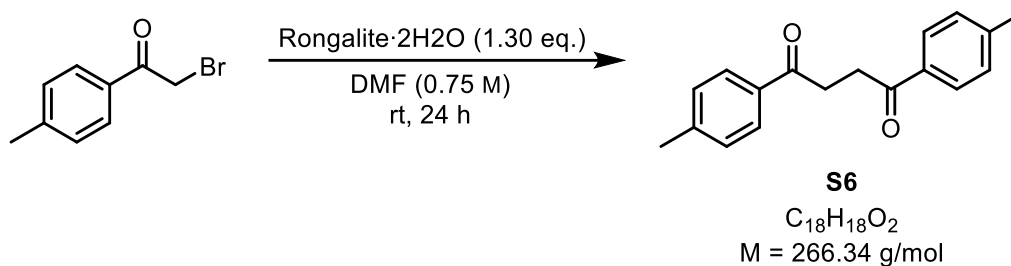

DMF (6.7 mL, 0.75 M) was added to a flask charged with 4-methylphenacyl bromide (1.00 g, 4.69 mmol, 1.00 eq.) and Rongalite·2H<sub>2</sub>O (940 mg, 6.10 mmol, 1.30 eq.) and the suspension was stirred for 24 hours at room temperature. The reaction mixture was poured into ice cold water (17 mL) and the precipitated solid was filtered off and redissolved in CH<sub>2</sub>Cl<sub>2</sub> (17 mL). The organic phase was washed with NaOH (1 M, aq., 17 mL) and brine (17 mL), dried over anhydrous Na<sub>2</sub>SO<sub>4</sub>, filtered, and concentrated *in vacuo* to afford the title compound as colourless solid (334 mg, 1.25 mmol, 53%).

**M.P.** = 150–152 °C (CH<sub>2</sub>Cl<sub>2</sub>)

**<sup>1</sup>H NMR (300 MHz, CDCl<sub>3</sub>):** δ (ppm) 7.94 (d, *J* = 8.31, 4H), 7.28 (d, *J* = 8.31, 4H), 3.43 (s, 4H), 2.42 (s, 6H).

**<sup>13</sup>C{<sup>1</sup>H} NMR (101 MHz, CDCl<sub>3</sub>):** δ (ppm) 198.6 (2C), 144.0 (2C), 134.5 (2C), 129.4 (4C), 128.4 (4C), 32.7 (2C), 21.8 (2C).

**IR (ATR):**  $\nu_{\max}$  = 2916, 1672, 1593, 1405, 1323, 1142, 1010, 777 cm<sup>-1</sup>.

**GCMS (ESI):** *m/z* calculated for C<sub>18</sub>H<sub>18</sub>O<sub>2</sub>Na<sup>+</sup> [M+Na]<sup>+</sup>: 289.1204; found: 289.1199.



**4,4'-(Hexa-1,5-diene-2,5-diyl)bis(methylbenzene) (1i)**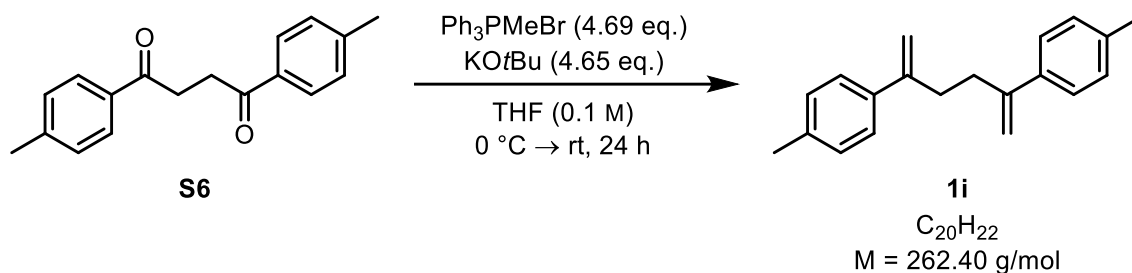

THF (11 mL, 0.1 M) was added to a flask charged with  $\text{Ph}_3\text{PMeBr}$  (1.89 g, 5.28 mmol, 4.69 eq.) and  $\text{KOtBu}$  (588 mg, 5.24 mmol, 4.65 eq.). The suspension was stirred for one hour at room temperature and then cooled down to  $0\text{ }^\circ\text{C}$ . Diketone **S6** (300 mg, 1.13 mmol, 1.00 eq.) was added in one portion. The reaction mixture was warmed to room temperature and stirred overnight. The reaction was quenched by slow addition of  $\text{NH}_4\text{Cl}$  (sat., aq., 10 mL) and the aqueous phase was extracted with  $\text{EtOAc}$  ( $3 \times 15\text{ mL}$ ). The combined organic phases were washed with brine (10 mL), dried over anhydrous  $\text{Na}_2\text{SO}_4$ , filtered and concentrated *in vacuo* before being purified by flash column chromatography ( $\text{SiO}_2$ , Pentane) to afford the title compound as a colourless solid (229 mg, 0.87 mmol, 77%).

$R_f = 0.35$  (Pentane).

**M.P.** =  $69\text{--}71\text{ }^\circ\text{C}$  ( $\text{CH}_2\text{Cl}_2$ )

**$^1\text{H}$  NMR (300 MHz,  $\text{CDCl}_3$ ):**  $\delta$  (ppm) 7.30–7.26 (m, 6H), 7.13 (d,  $J = 8.0\text{ Hz}$ , 2H), 5.25 (s, 2H), 5.00 (s, 2H), 2.62 (s, 4H), 2.35 (s, 6H).

**$^{13}\text{C}\{^1\text{H}\}$  NMR (101 MHz,  $\text{CDCl}_3$ ):**  $\delta$  (ppm) 148.0 (2C), 138.3 (2C), 137.3 (2C), 129.1 (4C), 126.2 (4C), 111.9 (2C), 34.5 (2C), 21.4 (2C).

**IR (ATR):**  $\nu_{\text{max}} = 3083, 2946, 2912, 1815, 1623, 1509, 902, 821\text{ cm}^{-1}$ .

**GCMS (EI):**  $m/z$  calculated for  $\text{C}_{20}\text{H}_{22}^+ [\text{M}]^+$ : 262.1; found: 262.0.

**2-Bromo-1-(*m*-tolyl)ethan-1-one (S7)**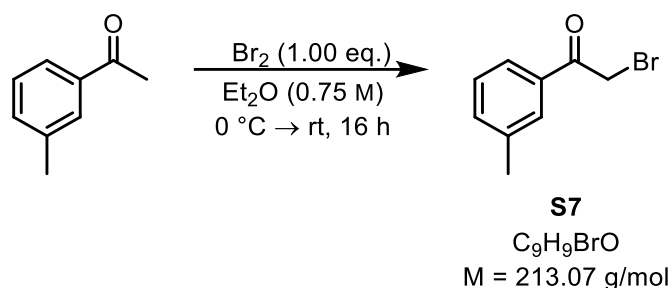

To a solution of 1-(*m*-tolyl)ethan-1-one (2.01 g, 15.0 mmol, 1.00 eq.) in Et<sub>2</sub>O (20 mL, 0.75 M) was added bromine (0.77 mL, 15 mmol, 1.0 eq.) at 0 °C. The mixture was washed with NaHCO<sub>3</sub> (sat., aq.) and the aqueous phase was extracted with Et<sub>2</sub>O (3×5 mL). The combined organic layers were dried over Na<sub>2</sub>SO<sub>4</sub>, filtered, and concentrated *in vacuo* before being purified by flash column chromatography (SiO<sub>2</sub>, 98:2 Pentane:Et<sub>2</sub>O) to obtain the title compound as a colourless oil (1.19 g, 5.58 mmol, 37%).

*R<sub>f</sub>* = 0.26 (98:2 Pentane:Et<sub>2</sub>O).

<sup>1</sup>H NMR (300 MHz, CDCl<sub>3</sub>): δ (ppm) 7.80–7.77 (m, 2H), 7.44–7.35 (m, 2H), 4.45 (s, 2H), 2.43 (s, 3H).

<sup>13</sup>C{<sup>1</sup>H} NMR (101 MHz, CDCl<sub>3</sub>): δ (ppm) 191.6 (1C), 138.9 (1C), 134.9 (1C), 134.2 (1C), 129.5 (1C), 128.9 (1C), 126.3 (1C), 31.2 (1C), 21.5 (1C).

IR (ATR):  $\nu_{\text{max}}$  = 2942, 1674, 1583, 1430, 1279, 1154, 781, 680 cm<sup>-1</sup>.

GCMS (ESI): *m/z* calculated for C<sub>9</sub>H<sub>9</sub>BrONa<sup>+</sup> [M+Na]<sup>+</sup>: 234.9831; found: 234.9829.

**1,4-Di-*m*-tolylbutane-1,4-dione (S8)**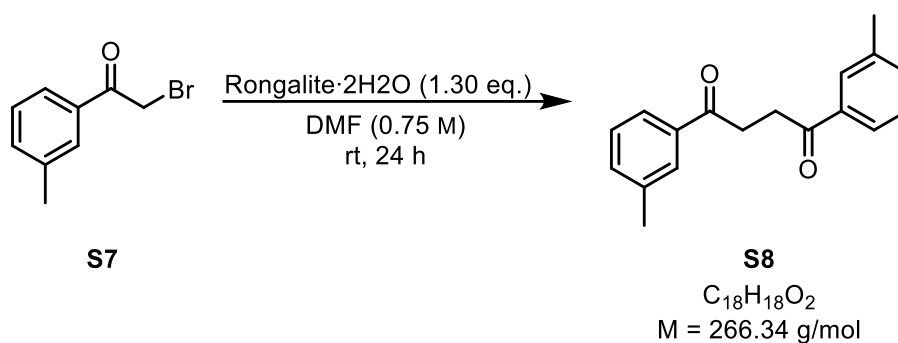

DMF (6.0 mL, 0.75 M) was added to a flask charged with ketone **S7** (0.96 g, 4.5 mmol, 1.0 eq.) and Rongalite·2H<sub>2</sub>O (906 mg, 5.88 mmol, 1.30 eq.) and the suspension was stirred for 24 hours at room temperature. The reaction mixture was poured into ice cold water (15 mL) and the precipitated solid was filtered off and redissolved in CH<sub>2</sub>Cl<sub>2</sub> (15 mL). The organic phase was washed with NaOH (1 M, aq., 15 mL) and brine (15 mL), dried over anhydrous Na<sub>2</sub>SO<sub>4</sub>, filtered, and concentrated *in vacuo* to afford the title compound as a colourless solid (434 mg, 1.63 mmol, 72%).

**M.P.** = 119–121 °C (CH<sub>2</sub>Cl<sub>2</sub>)

**<sup>1</sup>H NMR (300 MHz, CDCl<sub>3</sub>):** δ (ppm) 7.85–7.83 (m, 4H), 7.39–7.36 (m, 4H), 3.45 (s, 4H), 2.43 (s, 6H).

**<sup>13</sup>C{<sup>1</sup>H} NMR (101 MHz, CDCl<sub>3</sub>):** δ (ppm) 199.1 (2C), 138.5 (2C), 137.0 (2C), 134.0 (2C), 128.8 (2C), 128.6 (2C), 125.5 (2C), 32.9 (2C), 21.5 (2C).

**IR (ATR):**  $\nu_{\text{max}}$  = 2916, 1672, 1593, 1408, 1305, 1142, 1043, 766 cm<sup>-1</sup>.

**GCMS (ESI):**  $m/z$  calculated for C<sub>18</sub>H<sub>18</sub>O<sub>2</sub>Na<sup>+</sup> [M+Na]<sup>+</sup>: 289.1204; found: 289.1202.

**3,3'-(Hexa-1,5-diene-2,5-diyl)bis(methylbenzene) (1j)**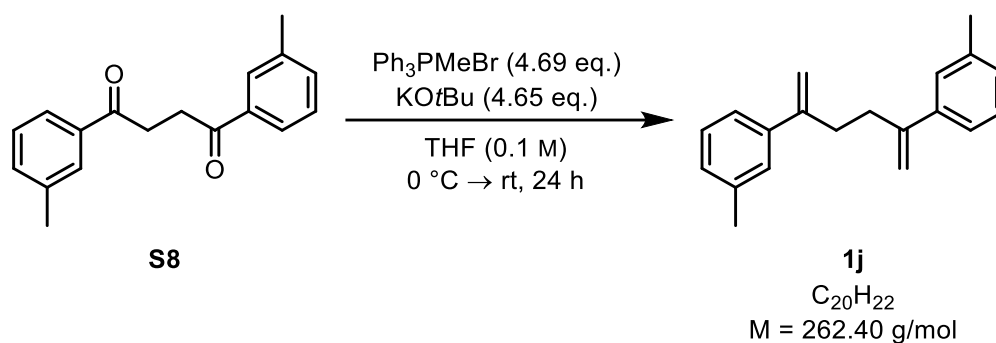

THF (11 mL, 0.1 M) was added to a flask charged with  $Ph_3PMeBr$  (1.89 g, 5.28 mmol, 4.69 eq.) and  $KOtBu$  (588 mg, 5.24 mmol, 4.65 eq.). The suspension was stirred for one hour at room temperature and then cooled down to 0 °C. Diketone **S8** (300 mg, 1.13 mmol, 1.00 eq.) was added in one portion. The reaction mixture was warmed to room temperature and stirred overnight. The reaction was quenched by slow addition of  $NH_4Cl$  (sat., aq., 10 mL) and the aqueous phase was extracted with  $EtOAc$  (3×15 mL). The combined organic phases were washed with brine (10 mL), dried over anhydrous  $Na_2SO_4$ , filtered and concentrated *in vacuo* before being purified by flash column chromatography ( $SiO_2$ , Pentane) to afford the title compound as a colourless oil (227 mg, 0.87 mmol, 77%).

$R_f = 0.38$  (Pentane).

$^1H$  NMR (300 MHz,  $CDCl_3$ ):  $\delta$  (ppm) 7.23–7.18 (m, 6H), 7.11–7.08 (m, 2H), 5.27 (s, 2H), 5.05 (s, 2H), 2.64 (s, 4H), 2.36 (s, 6H).

$^{13}C\{^1H\}$  NMR (101 MHz,  $CDCl_3$ ):  $\delta$  (ppm) 148.4 (2C), 141.3 (2C), 137.9 (2C), 128.31 (2C), 128.27 (2C), 127.1 (2C), 123.4 (2C), 112.5 (2C), 34.5 (2C), 21.7 (2C).

IR (ATR):  $\nu_{max} = 3079, 3031, 2939, 2916, 2858, 1623, 1597, 1483, 1450, 891, 788 \text{ cm}^{-1}$ .

GCMS (EI):  $m/z$  calculated for  $C_{20}H_{22}^+$  [M] $^+$ : 262.1; found: 262.1.

**2-Bromo-1-(*o*-tolyl)ethan-1-one (S9)**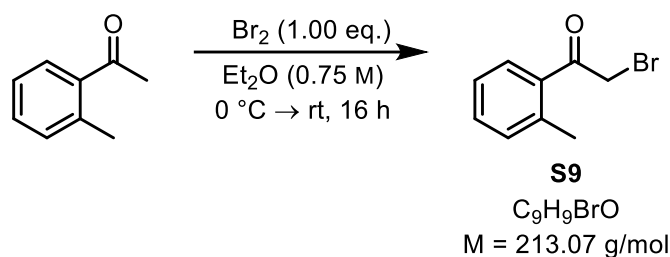

To a solution of 1-(*o*-tolyl)ethan-1-one (2.01 g, 15.0 mmol, 1.00 eq.) in Et<sub>2</sub>O (20 mL, 0.75 M) was added bromine (0.77 mL, 15 mmol, 1.0 eq.) at 0 °C. The mixture was washed with NaHCO<sub>3</sub> (sat., aq.) and the aqueous phase was extracted with Et<sub>2</sub>O (3×5 mL). The combined organic layers were dried over Na<sub>2</sub>SO<sub>4</sub>, filtered, and concentrated *in vacuo* before being purified by flash column chromatography (SiO<sub>2</sub>, 98:2 Pentane:Et<sub>2</sub>O) to obtain the title compound as colourless oil (1.20 g, 5.63 mmol, 37%).

*R*<sub>f</sub> = 0.37 (98:2 Pentane:Et<sub>2</sub>O).

<sup>1</sup>H NMR (300 MHz, CDCl<sub>3</sub>): δ (ppm) 7.69–7.66 (m, 1H), 7.46–7.41 (m, 1H), 7.31–7.29 (m, 2H), 4.42 (s, 2H), 2.53 (s, 3H).

<sup>13</sup>C{<sup>1</sup>H} NMR (101 MHz, CDCl<sub>3</sub>): δ (ppm) 194.3 (1C), 139.9 (1C), 134.6 (1C), 132.49 (1C), 132.46 (1C), 129.1 (1C), 125.9 (1C), 33.9 (1C), 21.6 (1C).

IR (ATR): *v*<sub>max</sub> = 2968, 2928, 1674, 1453, 1257, 1184, 980, 732, 614 cm<sup>-1</sup>.

GCMS (EI): *m/z* calculated for C<sub>9</sub>H<sub>9</sub>BrO<sup>+</sup> [M]<sup>+</sup>: 211.9831; found: 211.9830.

**1,4-Di-o-tolylbutane-1,4-dione (S10)**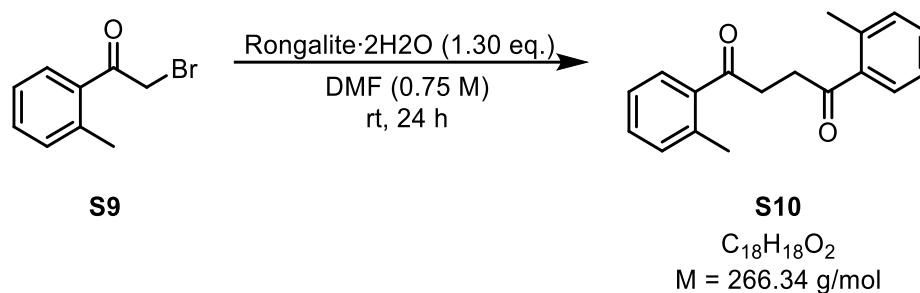

DMF (6.7 mL, 0.75 M) was added to a flask charged with ketone **S9** (1.00 g, 4.69 mmol, 1.00 eq.) and Rongalite·2H<sub>2</sub>O (940 mg, 6.10 mmol, 1.30 eq.) and the suspension was stirred for 24 hours at room temperature. The reaction mixture was poured into ice cold water (15 mL) and the precipitated solid was filtered off and redissolved in CH<sub>2</sub>Cl<sub>2</sub> (15 mL). The organic phase was washed with NaOH (1 M, aq., 15 mL) and brine (15 mL), dried over anhydrous Na<sub>2</sub>SO<sub>4</sub>, filtered, and concentrated *in vacuo* to afford the title compound as a colourless solid (323 mg, 1.22 mmol, 51%).

**M.P.** = 62–64 °C (CH<sub>2</sub>Cl<sub>2</sub>)

**<sup>1</sup>H NMR (300 MHz, CDCl<sub>3</sub>):** δ (ppm) 7.80 (d, *J* = 7.7 Hz, 2H), 7.38 (d, *J* = 7.2 Hz, 2H) 7.30–7.24 (m, 4H), 3.34 (s, 4H), 2.50 (s, 6H).

**<sup>13</sup>C{<sup>1</sup>H} NMR (101 MHz, CDCl<sub>3</sub>):** δ (ppm) 202.8 (2C), 138.2 (2C), 138.0 (2C), 132.0 (2C), 131.4 (2C), 128.7 (2C), 125.8 (2C), 35.8 (2C), 21.4 (2C).

**IR (ATR):**  $\nu_{\text{max}}$  = 2916, 1674, 1564, 1412, 1176, 988, 747 cm<sup>-1</sup>.

**GCMS (ESI):** *m/z* calculated for C<sub>18</sub>H<sub>18</sub>O<sub>2</sub>Na<sup>+</sup> [M+Na]<sup>+</sup>: 289.1204; found: 289.1199.

**2,2'-(Hexa-1,5-diene-2,5-diyl)bis(methylbenzene) (1k)**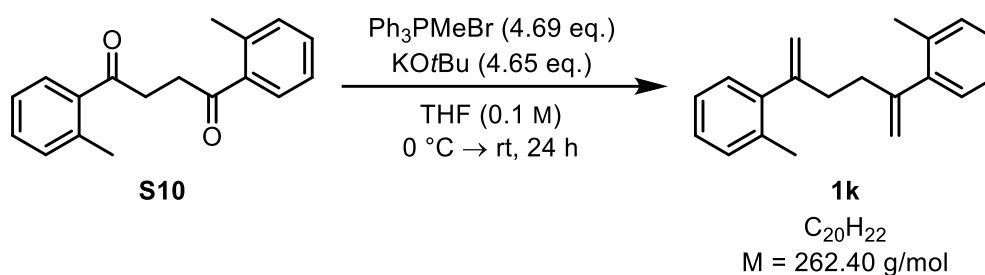

THF (11 mL, 0.1 M) was added to a flask charged with  $Ph_3PMeBr$  (1.89 g, 5.28 mmol, 4.69 eq.) and  $KOtBu$  (588 mg, 5.24 mmol, 4.65 eq.). The suspension was stirred for one hour at room temperature and then cooled down to 0 °C. Diketone **S10** (300 mg, 1.13 mmol, 1.00 eq.) was added in one portion. The reaction mixture was warmed to room temperature and stirred overnight. The reaction was quenched by slow addition of  $NH_4Cl$  (sat., aq., 10 mL) and the aqueous phase was extracted with  $EtOAc$  (3×15 mL). The combined organic phases were washed with brine (10 mL), dried over anhydrous  $Na_2SO_4$ , filtered and concentrated *in vacuo* before being purified by flash column chromatography ( $SiO_2$ , Pentane) to afford the title compound as a colourless oil (188 mg, 0.715 mmol, 63%).

$R_f$  = 0.32 (Pentane).

$^1H$  NMR (300 MHz,  $CDCl_3$ ):  $\delta$  (ppm) 7.17–7.10 (m, 6H), 7.06–7.03 (m, 2H), 5.19 (s, 2H), 4.88 (s, 2H), 2.45 (s, 4H), 2.25 (s, 6H).

$^{13}C\{^1H\}$  NMR (101 MHz,  $CDCl_3$ ):  $\delta$  (ppm) 149.7 (2C), 143.0 (2C), 135.0 (2C), 130.2 (2C), 128.5 (2C), 126.9 (2C), 125.2 (2C), 114.1 (2C), 35.9 (2C), 20.0 (2C).

IR (ATR):  $\nu_{max}$  = 3068, 3017, 2920, 1630, 1486, 895, 762, 729  $cm^{-1}$ .

GCMS (EI):  $m/z$  calculated for  $C_{20}H_{22}^+$  [ $M$ ] $^+$ : 262.1; found: 262.0.

**1,4-Bis(4-methoxyphenyl)butane-1,4-dione (S11)**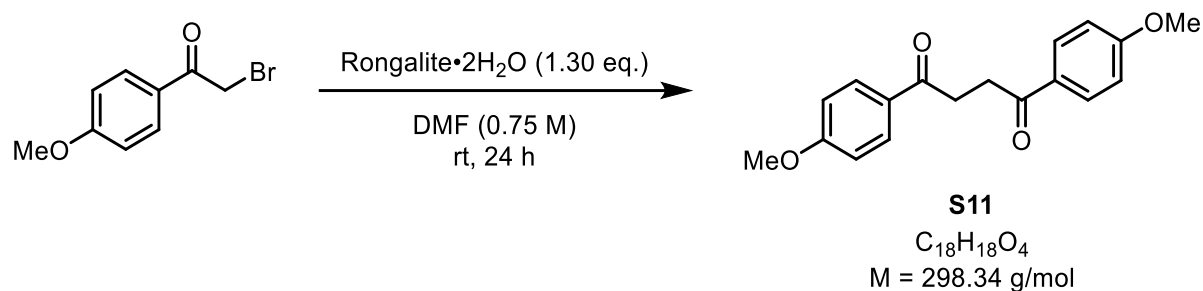

DMF (6.0 mL, 0.75 M) was added to a flask charged with 4-methoxyphenyl bromide (1.00 g, 4.37 mmol, 1.00 eq.) and Rongalite dihydrate·2H<sub>2</sub>O (875 mg, 5.68 mmol, 1.30 eq.) and the suspension was stirred for 24 h at room temperature. After addition of ice cold water (16 mL), the particulate was filtered off and redissolved in CH<sub>2</sub>Cl<sub>2</sub> (16 mL). The organic phase was washed with NaOH (1 M, aq., 16 mL) and brine (16 mL), dried over anhydrous Na<sub>2</sub>SO<sub>4</sub>, filtered, and concentrated *in vacuo*. After recrystallization from CH<sub>2</sub>Cl<sub>2</sub>, the title compound was obtained as colourless crystals (536 mg, 1.80 mmol, 82%).

CAUTION: Product proved to be unstable in solution.

Data were consistent with that reported in literature.<sup>10</sup>

**M.P.** = 145–149 °C (CH<sub>2</sub>Cl<sub>2</sub>)

**<sup>1</sup>H NMR** (300 MHz, CDCl<sub>3</sub>): δ/ppm = 8.04–8.01 (m, 4H), 6.96–6.93 (m, 4H), 3.88 (s, 6H), 3.40 (s, 4H).

**<sup>13</sup>C{<sup>1</sup>H} NMR** (101 MHz, CDCl<sub>3</sub>): δ/ppm = 197.6 (2C), 163.7 (2C), 130.5 (4C), 130.1 (2C), 113.9 (4C), 55.6 (2C), 32.5 (2C).



**4,4'-(Hexa-1,5-diene-2,5-diyl)bis(methoxybenzene) (1I)**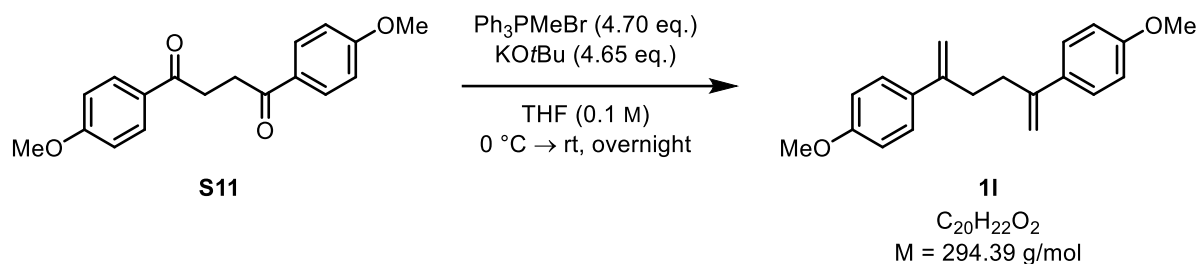

THF (8 mL, 0.1 M) was added to a flask charged with  $\text{Ph}_3\text{PMeBr}$  (1.34 g, 3.76 mmol, 4.70 eq.) and  $\text{KOtBu}$  (417 mg, 3.72 mmol, 4.65 eq.). The suspension was stirred for one hour at room temperature and then cooled down to  $0\text{ }^\circ\text{C}$ . Diketone **S11** (239 mg, 0.800 mmol, 1.00 eq.) was added in one portion, the reaction was warmed to room temperature and stirred overnight. The reaction was quenched by slow addition of  $\text{NH}_4\text{Cl}$  (sat., aq., 10 mL) and the aqueous phase was extracted with  $\text{EtOAc}$  ( $3 \times 10\text{ mL}$ ). The combined organic phases were washed with brine (15 mL), dried over anhydrous  $\text{Na}_2\text{SO}_4$ , filtered, and concentrated *in vacuo* before being purified by flash column chromatography ( $\text{SiO}_2$ , 19:1 Pentane: $\text{EtOAc}$ ) to afford the title compound as colourless crystals (202 mg, 0.685 mmol, 85%).

$R_f = 0.32$  (19:1 Pentane: $\text{EtOAc}$ ).

**M.P.** =  $128\text{--}132\text{ }^\circ\text{C}$  ( $\text{CH}_2\text{Cl}_2$ )

$^1\text{H NMR}$  (300 MHz,  $\text{CDCl}_3$ ):  $\delta/\text{ppm} = 7.45\text{--}7.32$  (m, 4H), 6.88–6.85 (m, 4H), 5.21 (s, 2H), 4.96 (s, 2H), 3.82 (s, 6H), 2.61 (s, 4H).

$^{13}\text{C}\{^1\text{H}\}$  NMR (101 MHz,  $\text{CDCl}_3$ ):  $\delta/\text{ppm} = 159.2$  (2C), 147.5 (2C), 133.7 (2C), 127.4 (4C), 113.8 (4C), 111.1 (2C), 55.4 (2C), 34.6 (2C).

**IR** (ATR):  $\nu_{\text{max}} = 3098, 2957, 2919, 2839, 1621, 1603, 1574, 1509, 1469, 1440, 1403, 1324, 1295, 1265, 1249, 1196, 1182, 1156, 1125, 1092, 1027, 1009, 960, 886, 839, 826, 817, 804, 795, 745, 693, 683, 636, 546, 519\text{ cm}^{-1}$ .

**HRMS** (EI): calculated for  $\text{C}_{20}\text{H}_{23}\text{O}_2^+$   $[\text{M}+\text{H}]^+$ : 295.1693; found: 295.1692.

**1,4-Di(pyridin-2-yl)butane-1,4-dione (S12)**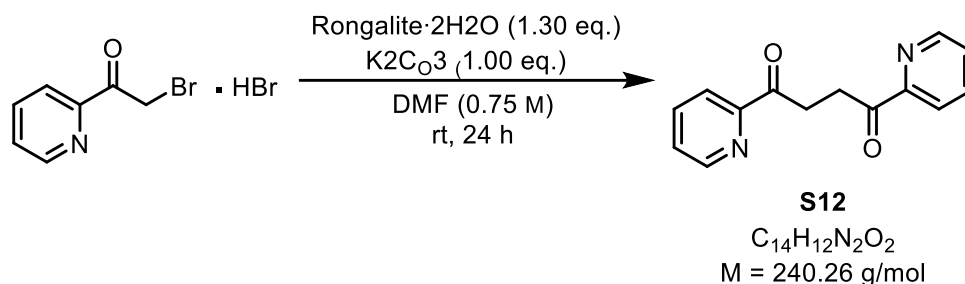

DMF (9.5 mL, 0.75 M) was added to a flask charged with 2-(Bromoacetyl)pyridine hydrobromide (2.00 g, 7.12 mmol, 1.00 eq.), Rongalite·2H<sub>2</sub>O (1.43 g, 9.25 mmol, 1.30 eq.) and K<sub>2</sub>CO<sub>3</sub> (984 g, 7.12 mmol, 1.00 eq.) and the suspension was stirred for 24 hours at room temperature. The reaction mixture was poured into ice cold water (25 mL) and the precipitated solid was filtered off and redissolved in CH<sub>2</sub>Cl<sub>2</sub> (25 mL). The organic phase was washed with NaOH (1 M, aq., 25 mL) and brine (25 mL), dried over anhydrous Na<sub>2</sub>SO<sub>4</sub>, filtered, and concentrated *in vacuo* to afford the title compound as a colourless solid (285 mg, 1.19 mmol, 33%).

**M.P.** = 134–136 °C (CH<sub>2</sub>Cl<sub>2</sub>)

**<sup>1</sup>H NMR (300 MHz, CDCl<sub>3</sub>):** δ (ppm) 8.71 (d, *J* = 4.6 Hz, 2H), 8.05 (d, *J* = 7.7 Hz, 2H), 7.83 (dt, *J* = 7.6, 1.3 Hz, 2H), 7.48 (dd, *J* = 7.6, 4.8 Hz, 2H), 3.70 (s, 4H).

**<sup>13</sup>C{<sup>1</sup>H} NMR (101 MHz, CDCl<sub>3</sub>):** δ (ppm) 200.6 (2C), 153.5 (2C), 149.1 (2C), 137.0 (2C), 127.3 (2C), 122.0 (2C), 32.2 (2C).

**IR (ATR):**  $\nu_{\text{max}}$  = 3368, 2924, 2366, 1686, 1583, 1323, 995, 751 cm<sup>-1</sup>.

**GCMS (ESI):** *m/z* calculated for C<sub>14</sub>H<sub>12</sub>N<sub>2</sub>O<sub>2</sub>Na<sup>+</sup> [M+Na]<sup>+</sup>: 263.0796; found: 263.0791.

**2,2'-(Hexa-1,5-diene-2,5-diyl)dipyridine (1m)**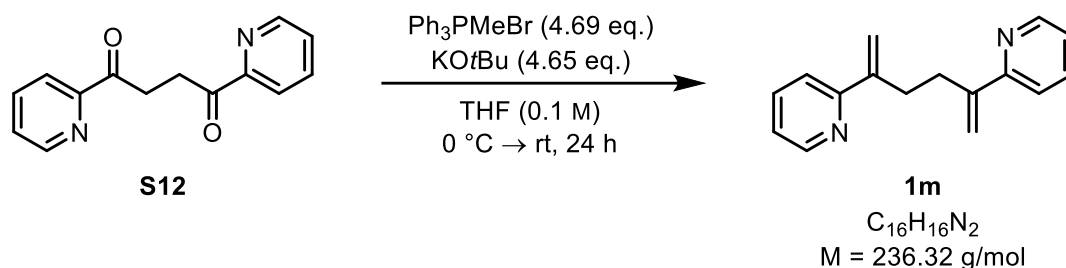

THF (10 mL, 0.1 M) was added to a flask charged with  $\text{Ph}_3\text{PMeBr}$  (1.74 g, 4.88 mmol, 4.69 eq.) and  $\text{KOtBu}$  (543 mg, 4.84 mmol, 4.65 eq.). The suspension was stirred for one hour at room temperature and then cooled down to 0 °C. Diketone **S12** (250 mg, 1.04 mmol, 1.00 eq.) was added in one portion. The reaction mixture was warmed to room temperature and stirred overnight. The reaction was quenched by slow addition of  $\text{NH}_4\text{Cl}$  (sat., aq., 10 mL) and the aqueous phase was extracted with  $\text{EtOAc}$  (3×15 mL). The combined organic phases were washed with brine (10 mL), dried over anhydrous  $\text{Na}_2\text{SO}_4$ , filtered and concentrated *in vacuo* before being purified by flash column chromatography ( $\text{SiO}_2$ , Pentane) to afford the title compound as a yellow oil (139 mg, 0.592 mmol, 56%).

$R_f = 0.17$  (Pentane)

$^1\text{H NMR}$  (300 MHz,  $\text{CDCl}_3$ ):  $\delta$  (ppm) 8.59 (d,  $J = 4.6$  Hz, 2H), 7.63 (dt,  $J = 7.8$  Hz 1.4 Hz, 2H), 7.50 (d,  $J = 7.8$  Hz, 2H), 7.16 (dd,  $J = 4.9$  Hz, 2.3 Hz, 2H), 5.77 (s, 2H), 5.27 (s, 2H), 2.85 (s, 4H).

$^{13}\text{C}\{^1\text{H}\}$  NMR (101 MHz,  $\text{CDCl}_3$ ):  $\delta$  (ppm) 158.5 (2C), 149.1 (2C), 147.8 (2C), 136.4 (2C), 122.2 (2C), 120.6 (2C), 115.5 (2C), 32.9 (2C).

IR (ATR):  $\nu_{\text{max}} = 3079, 3049, 2998, 2924, 1583, 1561, 1464, 1430, 902, 799, 740 \text{ cm}^{-1}$ .

GCMS (ESI):  $m/z$  calculated for  $\text{C}_{16}\text{H}_{16}\text{N}_2\text{Na}^+$  [ $\text{M}+\text{Na}$ ] $^+$ : 259.1211; found: 259.1206.

**1,4-Di(naphthalen-2-yl)butane-1,4-dione (S13)**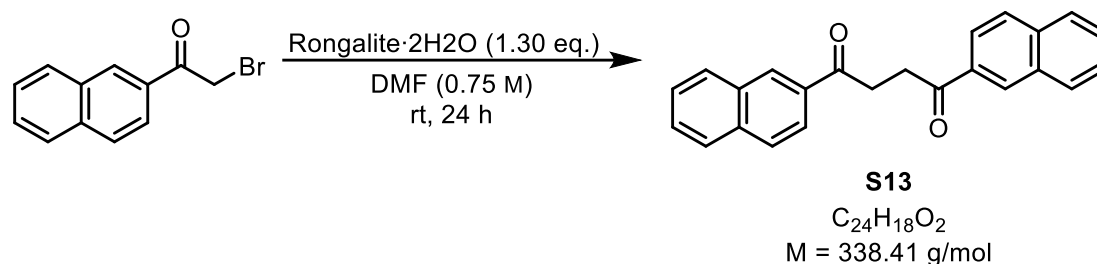

DMF (5.4 mL, 0.75 M) was added to a flask charged with 2-(Bromoacetyl)naphthalene (1.00 g, 4.01 mmol, 1.00 eq.) and Rongalite·2H<sub>2</sub>O (804 mg, 5.22 mmol, 1.30 eq.) and the suspension was stirred for 24 hours at room temperature. The reaction mixture was poured into ice cold water (13 mL) and the precipitated solid was filtered and washed with NaOH (1 M, aq., 2×13 mL) and Et<sub>2</sub>O (2×13 mL) to afford the title compound as colourless solid (407 mg, 1.20 mmol, 59%).

**M.P.** = 210–212 °C (CH<sub>2</sub>Cl<sub>2</sub>)

**<sup>1</sup>H NMR (300 MHz, CDCl<sub>3</sub>):** δ (ppm) 8.62 (s, 2H), 8.12 (d, *J* = 8.7 Hz, 2H), 8.01 (d, *J* = 8.0 Hz, 2H), 7.91 (t, *J* = 8.7 Hz, 4H), 7.64–7.55 (m, 4H), 3.68 (s, 4H).

**<sup>13</sup>C{<sup>1</sup>H} NMR (101 MHz, CDCl<sub>3</sub>):** δ (ppm) 198.9 (2C), 135.8 (2C), 134.3 (2C), 132.7 (2C), 130.1 (2C), 129.8 (2C), 128.6 (4C), 128.0 (2C), 126.9 (2C), 124.1 (2C), 33.0 (2C).

**IR (ATR):**  $\nu_{\max}$  = 3053, 2912, 1674, 1619, 1468, 1297, 1120, 788 cm<sup>-1</sup>.

**GCMS (ESI):** *m/z* calculated for C<sub>24</sub>H<sub>18</sub>O<sub>2</sub>Na<sup>+</sup> [M+Na]<sup>+</sup>: 361.1204; found: 361.1199.

**2,2'-(Hexa-1,5-diene-2,5-diyl)dinaphthalene (1n)**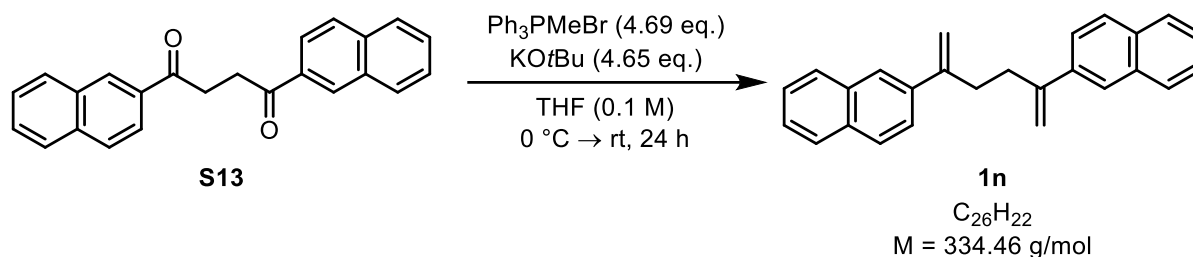

THF (8.9 mL, 0.1 M) was added to a flask charged with  $Ph_3PMeBr$  (1.49 g, 4.16 mmol, 4.69 eq.) and  $KOtBu$  (463 mg, 4.12 mmol, 4.65 eq.). The suspension was stirred for one hour at room temperature and then cooled down to 0 °C. Diketone **S13** (300 mg, 0.89 mmol, 1.00 eq.) was added in one portion. The reaction mixture was warmed to room temperature and stirred overnight. The reaction was quenched by slow addition of  $NH_4Cl$  (sat., aq., 10 mL) and the aqueous phase was extracted with  $EtOAc$  (3×15 mL). The combined organic phases were washed with brine (10 mL), dried over anhydrous  $Na_2SO_4$ , filtered and concentrated *in vacuo* before being purified by flash column chromatography ( $SiO_2$ , Pentane) to afford the title compound as a colourless solid (225 mg, 0.674 mmol, 76%).

$R_f$  = 0.17 (Pentane).

**M.P.** = 41–43 °C ( $CH_2Cl_2$ )

$^1H$  NMR (300 MHz,  $CDCl_3$ ):  $\delta$  (ppm) 7.84–7.43 (m, 14H), 5.44 (s, 2H), 5.17 (s, 2H), 2.82 (s, 4H).

$^{13}C\{^1H\}$  NMR (101 MHz,  $CDCl_3$ ):  $\delta$  (ppm) 148.0 (2C), 138.4 (2C), 133.5 (2C), 133 (2C), 128.3 (2C), 128.0 (2C), 127.7 (2C), 126.3 (2C), 126.0 (2C), 124.9 (4C), 113.4 (2C), 34.7 (2C).

IR (ATR):  $\nu_{max}$  = 3049, 2950, 2928, 2359, 1619, 1590, 1128, 888, 862, 744  $cm^{-1}$ .

**GCMS** (EI):  $m/z$  calculated for  $C_{26}H_{22}^+$  [ $M$ ] $^+$ : 334.1; found: 334.1.

**1-Phenylprop-2-en-1-one (S14):**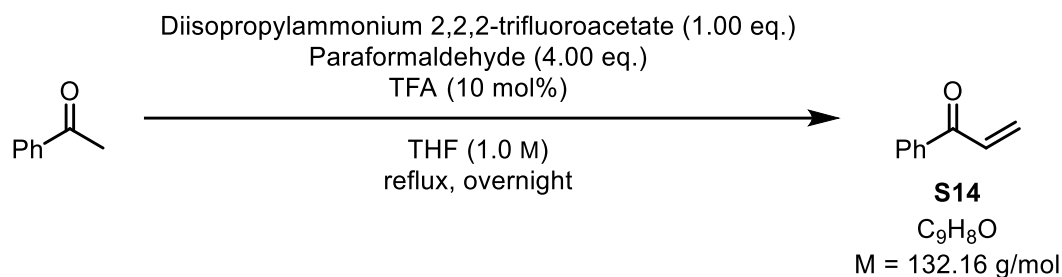

Trifluoroacetic acid (0.32 mL, 4.2 mmol, 10 mol%) was added to a suspension of diisopropylammonium 2,2,2-trifluoroacetate (8.96 g, 41.6 mmol, 1.00 eq.), acetophenone (4.9 mL, 42 mmol, 1.00 eq.) and paraformaldehyde (2.50 g, 83.3 mmol, 2.00 eq.) in THF (42 mL, 0.10 M). The reaction mixture was refluxed ( $T = 90\text{ }^{\circ}\text{C}$ ) for 2 h and cooled down to room temperature. Paraformaldehyde (2.50 g, 83.3 mmol, 2.00 eq.) was added in one portion and the reaction was refluxed overnight. After concentration *in vacuo*, the residue was redissolved in Et<sub>2</sub>O (50 mL). The organic phase was washed with HCl (1 M, aq. 10 mL), NaOH (1 M, aq. 10 mL), brine (10 mL), dried over anhydrous Na<sub>2</sub>SO<sub>4</sub>, filtered and concentrated *in vacuo* before being purified by column chromatography (SiO<sub>2</sub>, 95:5 Pentane:EtOAc) to afford the title compound as a pale yellow oil (686 mg, 5.19 mmol, 12%).<sup>16</sup>

Data were consistent with that reported in literature.<sup>17</sup>

$R_f = 0.32$  (95:5 Pentane:EtOAc)

**<sup>1</sup>H NMR (300 MHz, CDCl<sub>3</sub>):**  $\delta$  (ppm): 7.97–7.93 (m, 2H), 7.61–7.55 (m, 1H), 7.49 (ddt,  $J = 8.3, 6.7, 1.3$  Hz, 2H), 7.16 (dd,  $J = 17.2, 10.6$  Hz, 1H), 6.44 (dd,  $J = 17.2, 1.7$  Hz, 1H), 5.94 (dd,  $J = 10.6, 1.7$  Hz, 1H).

**<sup>13</sup>C{<sup>1</sup>H} NMR (75 MHz, CDCl<sub>3</sub>):**  $\delta$  (ppm): 191.2 (1C), 137.4 (1C), 133.1 (2C), 132.5 (1C), 130.3 (2C), 128.8 (1C), 128.8 (1C).

**1-Phenyl-4-(4-(trifluoromethyl)phenyl)butane-1,4-dione (S15):**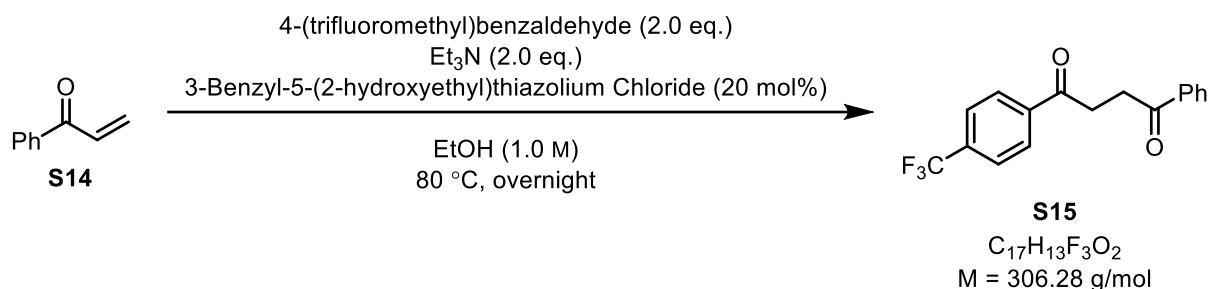

3-Benzyl-5-(2-hydroxyethyl)thiazolium chloride (108 mg, 0.400 mmol, 20 mol%), 4-(trifluoromethyl)benzaldehyde (696 mg, 4.00 mmol, 2 eq.) and Et<sub>3</sub>N (0.560 mL, 4.00 mmol, 2 eq.) were sequentially added to a solution of phenyl vinyl ketone (264 mg, 2.00 mmol, 1 eq.) in EtOH (2.00 mL, 1.0 M) and the reaction was then stirred at 80 °C overnight. The reaction was cooled to room temperature and H<sub>2</sub>O (5 mL) was added. The aqueous phase was extracted with CH<sub>2</sub>Cl<sub>2</sub> (3 × 10 mL) and the combined organic phases were washed with brine (10 mL), dried over anhydrous Na<sub>2</sub>SO<sub>4</sub>, filtered, and concentrated *in vacuo* before being purified by flash column chromatography (SiO<sub>2</sub>, 9:1 Pentane:Et<sub>2</sub>O) to afford the title compound as a colourless oil (539 mg, 1.75 mmol, 87%).

*R<sub>f</sub>* = 0.2 (90:10 Pentane:Et<sub>2</sub>O)

<sup>1</sup>H NMR (400 MHz, CDCl<sub>3</sub>): 8.18–8.11 (m, 2H), 8.06–8.01 (m, 2H), 7.75 (d, *J* = 8.2 Hz, 2H), 7.61–7.56 (m, 1H), 7.52–7.46 (m, 2H), 3.52–3.43 (m, 4H).

<sup>13</sup>C{<sup>1</sup>H} NMR (101 MHz, CDCl<sub>3</sub>): 198.5 (1C), 198.0 (1C), 139.6 (1C), 136.7 (1C), 134.7 (d, *J* = 32.6 Hz, 1C), 133.4 (1C), 128.8 (2C), 128.6 (2C), 128.3 (2C), 125.8 (q, *J* = 3.7 Hz, 2C), 122.4 (1C), 32.9 (1C), 32.7 (1C).

<sup>19</sup>F{<sup>1</sup>H} (282 MHz, CDCl<sub>3</sub>): –63.10.

IR (ATR):  $\nu_{\text{max}}$  = 2919, 1673, 1320, 1311, 1169, 1155, 1112, 1005, 751, 732, 689 cm<sup>-1</sup>.

HRMS (ESI): *m/z* calculated for C<sub>17</sub>H<sub>14</sub>O<sub>2</sub>F<sub>3</sub><sup>+</sup> [M+H]<sup>+</sup>: 307.0940; found: 30943.

**1-(5-Phenylhexa-1,5-dien-2-yl)-4-(trifluoromethyl)benzene (1o):**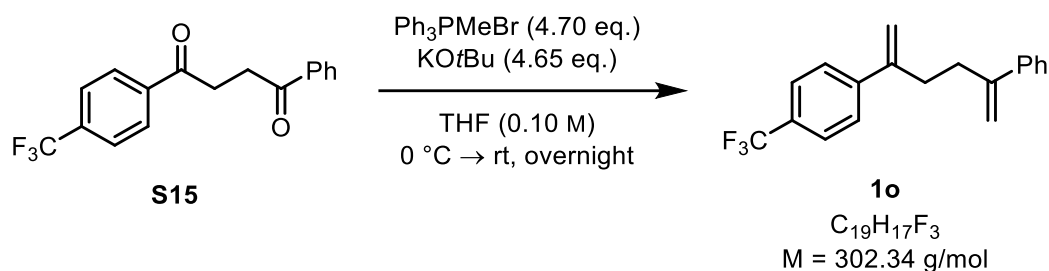

THF (10 mL, 0.1 M) was added to a flask charged with  $Ph_3PMeBr$  (1.68 g, 4.70 mmol, 4.70 eq.) and  $KOtBu$  (521 mg, 4.65 mmol, 4.65 eq.). The suspension was stirred for one hour at room temperature and then cooled down to 0 °C. Diketone **S15** (306 mg, 1.00 mmol, 1.00 eq.) was added in one portion. The reaction mixture was warmed to room temperature and stirred overnight. The reaction was quenched by slow addition of  $NH_4Cl$  (sat., aq., 10 mL) and the aqueous phase was extracted with  $EtOAc$  (3×15 mL). The combined organic phases were washed with brine (10 mL), dried over anhydrous  $Na_2SO_4$ , filtered and concentrated *in vacuo* before being purified by flash column chromatography ( $SiO_2$ , Pentane) to afford the title compound as a colourless solid (159 mg, 0.526 mmol, 52%).

**M.P.** = 31–32 °C

**R<sub>f</sub>** = 0.27 (80:20 Pentane)

**<sup>1</sup>H NMR (300 MHz,  $CDCl_3$ ):** 7.57 (d,  $J = 8.2$  Hz, 2H), 7.46 (d,  $J = 8.2$  Hz, 2H), 7.39–7.26 (m, 5H), 5.30 (d,  $J = 17.2$  Hz, 2H), 5.08 (d,  $J = 32.2$  Hz, 2H), 2.65 (s, 4H).

**<sup>13</sup>C{<sup>1</sup>H} NMR (126 MHz,  $CDCl_3$ ):** 147.9 (1C), 147.1 (1C), 144.9 (d,  $J = 1.5$  Hz, 1C), 141.1 (1C), 129.5 (q,  $J = 32.2$  Hz, 1C), 128.5 (2C), 127.6 (1C), 126.6 (2C), 126.3 (2C), 125.4 (q,  $J = 3.8$  Hz, 2C), 123.3 (1C), 114.8 (1C), 113.0 (1C), 34.3 (1C), 34.2 (1C).

**<sup>19</sup>F{<sup>1</sup>H} (282 MHz,  $CDCl_3$ ):** –62.47.

**IR (ATR):**  $\nu_{max} = 3085, 2941, 1324, 1166, 1120, 1066, 901, 847, 777, 703 \text{ cm}^{-1}$ .

**GCMS (EI):**  $m/z$  calculated for  $C_{19}H_{17}F_3$   $[M]^+$ : 302.1277; found: 302.1274.



**Ethyl 2-benzoylpent-4-enoate (S16)**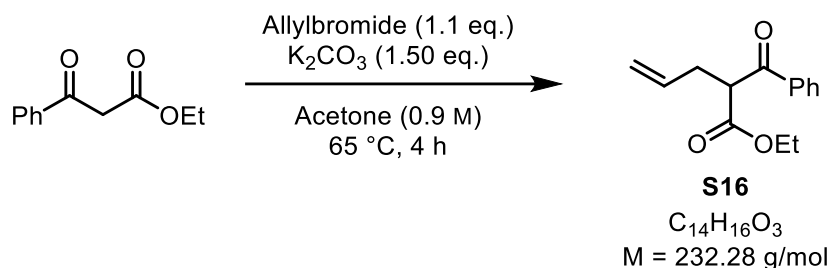

Under air, allyl bromide (filtered over K<sub>2</sub>CO<sub>3</sub>, 1.4 mL, 16 mmol, 1.1 eq.) was added to a flask charged with ethyl benzoylacetate (3.1 mL, 15 mmol, 1.0 eq.) and K<sub>2</sub>CO<sub>3</sub> (3.11 g, 22.5 mmol, 1.50 eq.). Acetone (17 mL, 0.9 M) was added and the suspension was stirred for 4 hours at 65 °C. The reaction was cooled to room temperature, filtered over Celite<sup>®</sup>, and concentrated *in vacuo* before being purified by flash column chromatography (SiO<sub>2</sub>, 10:1 Pentane:EtOAc) to afford the title compound as a pale yellow oil (3.60 g, 15.5 mmol, 96%).

Data were consistent with that reported in literature.<sup>18</sup>

*R<sub>f</sub>* = 0.35 (10:1 Pentane:EtOAc).

<sup>1</sup>H NMR (300 MHz, CDCl<sub>3</sub>): δ/ppm = 8.01–7.98 (m, 2H), 7.61–7.56 (m, 1H), 7.50–7.45 (m, 2H), 5.89–5.75 (m, 1H), 5.15–5.02 (m, 2H), 4.39 (t, *J* = 7.26 Hz, 1H), 4.14 (dq, *J* = 7.17, 2.02 Hz, 2H), 2.78–2.73 (m, 2H), 1.17 (t, *J* = 7.17 Hz, 3H).

<sup>13</sup>C{<sup>1</sup>H} NMR (101 MHz, CDCl<sub>3</sub>): δ/ppm = 194.7 (1C), 169.5 (1C), 136.3 (1C), 134.6 (1C), 133.7 (1C), 128.9 (2C), 128.8 (2C), 117.5 (1C), 61.6 (1C), 54.1 (1C), 33.1 (1C), 14.1 (1C).

**Ethyl 2-(1-phenylvinyl)pent-4-enoate (1p)**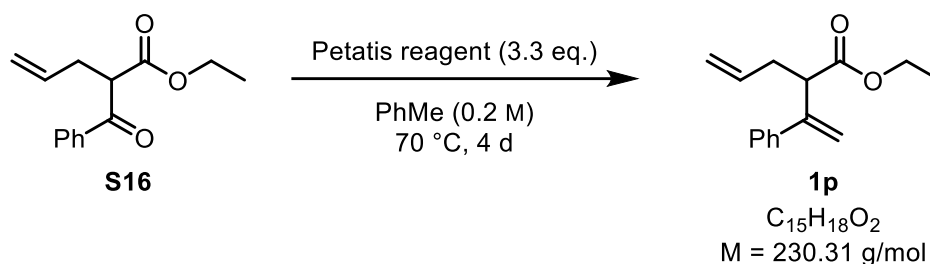

At room temperature, Petasis reagent (0.71 M in PhMe, 7.0 mL, 5.0 mmol, 3.3 eq.) was added to ketone **S16** (357 mg, 1.54 mmol, 1.00 eq.) and stirred at 70 °C for four days.  $\text{NH}_4\text{Cl}$  (aq., sat., 15 mL) was added, the reaction mixture was diluted with EtOAc (15 mL) and the aqueous phase extracted with EtOAc (3  $\times$  10 mL). The combined organic phases were washed with brine (10 mL), dried over anhydrous  $\text{Na}_2\text{SO}_4$ , filtered, and concentrated *in vacuo* before being purified by flash column chromatography ( $\text{SiO}_2$ , 92:8, Pentane:EtOAc) to afford the title compound as a yellow oil (57.7 mg, 0.251 mmol, 16%).

$R_f$  = 0.46 (92:8, Pentane:EtOAc).

$^1\text{H NMR}$  (300 MHz,  $\text{CDCl}_3$ ):  $\delta$ /ppm = 7.41–7.28 (m, 5H), 5.85–5.72 (m, 1H), 5.41 (s, 1H), 5.29 (s, 1H), 5.10–5.00 (m, 2H), 4.14 (q,  $J$  = 7.13 Hz, 2H), 3.61 (dd,  $J$  = 8.94, 6.16 Hz, 1H), 2.71–2.61 (m, 1H), 2.48–2.39 (m, 1H), 1.20 (t,  $J$  = 7.13 Hz, 3H).

$^{13}\text{C}\{^1\text{H}\}$  NMR (101 MHz,  $\text{CDCl}_3$ ):  $\delta$ /ppm = 173.4 (1C), 146.6 (1C), 141.4 (1C), 135.6 (1C), 128.5 (2C), 127.8 (1C), 126.7 (2C), 116.9 (1C), 115.0 (1C), 60.9 (1C), 50.3 (1C), 36.3 (1C), 14.3 (1C).

IR (ATR):  $\nu_{\text{max}}$  = 3083, 2980, 2931, 1732, 1642, 1496, 1444, 1370, 1335, 1298, 1275, 1261, 1246, 1222, 1176, 1161, 1120, 1097, 1073, 1028, 999, 908, 777, 701  $\text{cm}^{-1}$ .

HRMS (ESI): calculated for  $\text{C}_{15}\text{H}_{18}\text{O}_2\text{Na}^+$  [M+Na] $^+$ : 253.1199; found: 253.1203.

**2-Phenylhexa-1,5-dien-3-ol (1q):**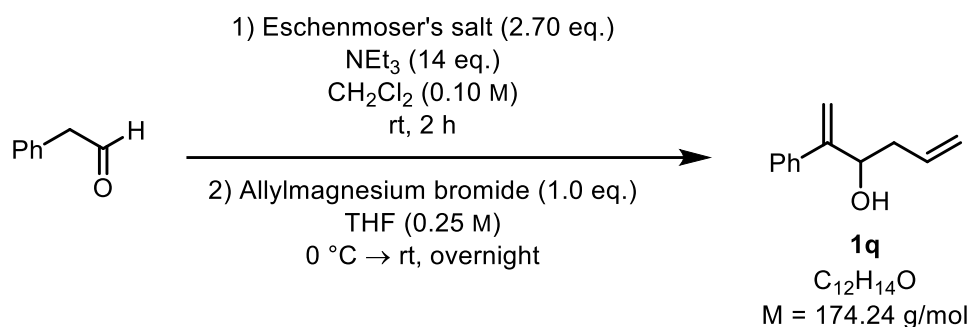

**Step 1:** To a suspension of Eschenmoser's salt (2.50g, 13.5 mmol, 2.70 eq.) in CH<sub>2</sub>Cl<sub>2</sub> (50 mL, 0.10 M) 2-phenylacetaldehyde (0.58 mL, 5.0 mmol, 1.0 eq.) and NEt<sub>3</sub> (9.7 mL, 70 mmol, 14 eq.) were added. The solution was stirred for 2 h at room temperature, washed with NaHCO<sub>3</sub> (2 × 20 mL) and brine (10 mL). The organic phase was dried over anhydrous Na<sub>2</sub>SO<sub>4</sub>, filtered and the solvent was removed under reduced pressure (the water bath temperature was kept at 0 °C to reduce polymerisation).

**Step 2:** The pale yellow residue was redissolved in THF (5 mL, 1.0 M) and added dropwise to a solution of allylmagnesium bromide (1.0 M in Et<sub>2</sub>O, 5.0 mL, 5.0 mmol, 1.0 eq.) in THF (20 mL, 0.25 M) over 5 minutes at 0 °C. The reaction was allowed to warm to room temperature overnight. After quenching with NH<sub>4</sub>Cl (sat., aq., 10 mL), the aqueous phase was extracted with EtOAc (3 × 20 mL). The combined organic phases were washed with brine (10 mL), dried over anhydrous Na<sub>2</sub>SO<sub>4</sub>, filtered and concentrated *in vacuo* before being purified by column chromatography (SiO<sub>2</sub>, 90:10 Pentane:EtOAc) to afford the title compound as a pale yellow oil (261 mg, 1.50 mmol, 29%).

**R<sub>f</sub>** = 0.29 (90:10 Pentane:EtOAc)

**<sup>1</sup>H NMR (300 MHz, CDCl<sub>3</sub>):** δ (ppm): 7.40–7.27 (m, 5H), 5.88–5.74 (m, 1H), 5.35 (d, *J* = 17.3 Hz, 2H), 5.15–5.09 (m, 2H), 4.70 (dt, *J* = 8.3, 4.2 Hz, 1H), 2.45–2.37 (m, 1H), 2.23 (dt, *J* = 14.3, 7.6 Hz, 1H), 1.93 (d, *J* = 4.3 Hz, 1H).

**<sup>13</sup>C{<sup>1</sup>H} NMR (75 MHz, CDCl<sub>3</sub>):** δ (ppm): 151.2 (1C), 140.1 (1C), 134.4 (1C), 128.5 (2C), 127.8 (1C), 127.1 (2C), 118.5 (1C), 112.9 (1C), 72.5 (1C), 40.6 (1C).

**IR (ATR):** *v*<sub>max</sub> = 3385, 3058, 1493, 1053, 908, 777, 699 cm<sup>-1</sup>.

**HRMS (ESI):** *m/z* calculated for C<sub>12</sub>H<sub>14</sub>ONa<sup>+</sup> [M+Na]<sup>+</sup>: 197.0937; found: 197.0937.

**(E)-3-phenylbut-2-enoic acid (S17):**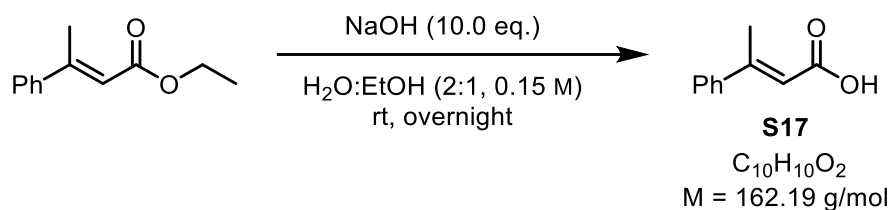

NaOH (2.2 M, aq., 19 mL, 42 mmol, 10 eq.) was added to a solution of 3-phenylbut-2-enoate (800 mg, 4.21 mmol, 1.00 eq.) in EtOH (9 mL, 0.5 M) at room temperature. The reaction was stirred overnight, volatiles were removed *in vacuo* and H<sub>2</sub>O (15 mL) was added.<sup>19</sup> The aqueous phase was washed with EtOAc (2 × 5 mL) and acidified using HCl (1 M, aq.). After extraction of the aqueous phase with EtOAc (3 × 25 mL), the combined organic phases were washed with brine (5 mL), dried over anhydrous Na<sub>2</sub>SO<sub>4</sub>, filtered and concentrated *in vacuo*. The title compound was obtained as colorless solid (649 mg, 4.01 mmol, 95%) and was used without further purification.

**M.P.** = 85–88 °C

**<sup>1</sup>H NMR (300 MHz, CDCl<sub>3</sub>):** 7.50–7.48 (m, 2H), 7.39 (dd,  $J = 5.1, 1.8 \text{ Hz}$ , 3H), 6.18 (m, 1H), 2.61 (d,  $J = 1.3 \text{ Hz}$ , 3H).

**<sup>13</sup>C{<sup>1</sup>H} NMR (101 MHz, CDCl<sub>3</sub>):**  $\delta$  (ppm): 171.0 (1C), 158.6 (1C), 142.2 (1C), 129.5 (1C), 128.7 (2C), 126.6 (2C), 116.3 (1C), 18.4 (1C).

**IR (ATR):**  $\nu_{\text{max}} = 3061, 2921, 1677, 1622, 1450, 910, 867 \text{ cm}^{-1}$ .

**HRMS (ESI):**  $m/z$  calculated for C<sub>10</sub>H<sub>9</sub>O<sub>2</sub><sup>-</sup> [M-H]<sup>-</sup>: 161.0608; found: 161.0608.

**(S,E)-4-benzyl-3-(3-phenylbut-2-enoyl)oxazolidin-2-one (S18):**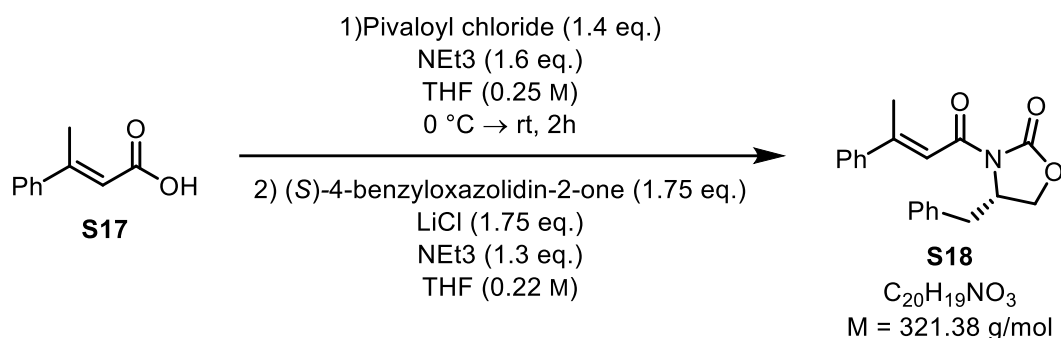

**Step 1:** At 0 °C NEt<sub>3</sub> (0.40 mL, 2.9 mmol, 1.6 eq.) and pivaloyl chloride (0.31 mL, 2.5 mmol, 1.4 eq.) were added dropwise over one minute to a suspension of (*E*)-3-phenylbut-2-enoic acid (292 mg, 1.80 mmol, 1.00 eq.) in THF (7.2 mL, 0.25 M) and the reaction mixture was stirred for 2 hours at 0 °C.

**Step 2:** At 0 °C NEt<sub>3</sub> (0.32 mL, 2.3 mmol, 1.3 eq.) was added to a suspension of (*S*)-4-benzylloxazolidin-2-one (558 mg, 3.15 mmol, 1.75 eq.) and LiCl (134 mg, 3.15 mmol, 1.75 eq.) in THF (0.9 mL, 2 M). After stirring for one hour at 0 °C the anhydride suspension was added dropwise over 20 minutes and was allowed to warm to room temperature overnight. NH<sub>4</sub>Cl (sat., aq., 10 mL) and water (4 mL) were added and the aqueous phase was extracted with EtOAc (3 × 25 mL). The combined organic phases were washed with brine (3 mL), dried over anhydrous Na<sub>2</sub>SO<sub>4</sub>, filtered and concentrated *in vacuo* before being purified by column chromatography (SiO<sub>2</sub>, 80:20 Pentane:EtOAc) to afford the title compound as a colourless solid (578 mg, 1.80 mmol, quant.).

**M.P.** = 82–84 °C

**R<sub>f</sub>** = 0.29 (80:20 Pentane:EtOAc)

**<sup>1</sup>H NMR (300 MHz, CDCl<sub>3</sub>):** 7.61–7.58 (m, 2H), 7.44–7.23 (m, 9H), 4.83–4.75 (m, 1H), 4.26–4.16 (m, 2H), 3.41 (dd, *J* = 13.4, 3.4 Hz, 1H), 2.83 (dd, *J* = 13.3, 9.6 Hz, 1H), 2.62 (d, *J* = 1.3 Hz, 3H).

**<sup>13</sup>C{<sup>1</sup>H} NMR (101 MHz, CDCl<sub>3</sub>):** 165.4 (1C), 157.2 (1C), 153.7 (1C), 142.4 (1C), 135.7 (1C), 129.6 (2C), 129.5 (1C), 129.1 (2C), 128.7 (2C), 127.4 (1C), 126.8 (2C), 116.9 (1C), 66.2 (1C), 55.5 (1C), 38.2 (1C), 19.0 (1C).

**IR (ATR):**  $\nu_{\text{max}}$  = 3024, 1772, 1675, 1387, 1208, 700 cm<sup>-1</sup>.

**HRMS (ESI):** *m/z* calculated for C<sub>20</sub>H<sub>20</sub>NO<sub>3</sub><sup>+</sup> [M+H]<sup>+</sup>: 322.1438; found: 322.1438.

**(S)-4-Benzyl-3-((S)-2-(1-phenylvinyl)pent-4-enoyl)oxazolidin-2-one (1r):**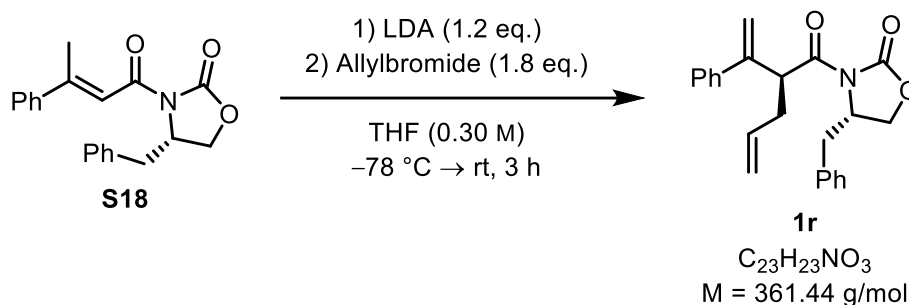

At 0 °C *n*BuLi (2.5 M in hexanes, 0.58 mL, 1.4 mmol, 1.2 eq.) was added to a solution of diisopropylamine (0.22 mL, 1.6 mmol, 1.3 eq.) in THF (4.0 mL, 0.30 M). After stirring for 30 minutes at 0 °C the reaction mixture was cooled down to -78 °C, alkene **S18** (386 mg, 1.20 mmol, 1.00 eq.) was added in one portion and the reaction was stirred for further 30 minutes. Allyl bromide (0.19 mL, 2.2 mmol, 1.8 eq., freshly filtered over K<sub>2</sub>CO<sub>3</sub>) was added dropwise over one minute, the cooling bath was removed and the reaction was stirred for 3 hours at room temperature. NH<sub>4</sub>Cl (sat., aq., 5 mL) and H<sub>2</sub>O (5 mL) were added and the aqueous phase was extracted with EtOAc (3 × 15 mL). The combined organic phases were washed with HCl (1 M, aq., 3 mL), brine (5 mL), dried over anhydrous Na<sub>2</sub>SO<sub>4</sub>, filtered and concentrated *in vacuo* before being purified by column chromatography (SiO<sub>2</sub>, 90:10, Pentane:EtOAc) to afford the title compound as a yellow oil (144 mg, 0.400 mmol, 33%).

**R<sub>f</sub>** = 0.40 (85:15 Pentane:EtOAc)

**<sup>1</sup>H NMR (600 MHz, CDCl<sub>3</sub>):** 7.50–7.47 (m, 2H), 7.36–7.31 (m, 4H), 7.30–7.27 (m, 2H), 7.24–7.21 (m, 2H), 5.86 (dddd, *J* = 17.4, 10.3, 7.4, 6.0 Hz, 1H), 5.35 (s, 1H), 5.20–5.14 (m, 2H), 5.11 (dq, *J* = 17.2, 1.6 Hz, 1H), 5.05 (dq, *J* = 10.2, 1.3 Hz, 1H), 4.64 (dddd, *J* = 9.9, 7.6, 3.3, 2.5 Hz, 1H), 4.13 (dd, *J* = 9.1, 2.5 Hz, 1H), 4.08 (ddd, *J* = 9.0, 7.7, 0.8 Hz, 1H), 3.32 (dd, *J* = 13.3, 3.3 Hz, 1H), 2.76 (dd, *J* = 13.4, 9.7 Hz, 1H), 2.71 (dddt, *J* = 14.4, 9.7, 7.4, 1.2 Hz, 1H), 2.44 (dddt, *J* = 14.5, 5.9, 4.4, 1.5 Hz, 1H).

**<sup>13</sup>C{<sup>1</sup>H} NMR (126 MHz, CDCl<sub>3</sub>):** 173.3 (1C), 153.2 (1C), 147.2 (1C), 140.7 (1C), 135.7 (1C), 135.4 (1C), 129.6 (2C), 129.1 (2C), 128.6 (2C), 128.0 (1C), 127.5 (1C), 127.0 (2C), 117.1 (1C), 114.0 (1C), 66.1 (1C), 56.0 (1C), 48.2 (1C), 38.2 (1C), 36.0 (1C).

**IR (ATR):**  $\nu_{\max}$  = 3063, 2980, 1775, 1697, 1384, 1350, 1252, 1226, 1206, 1200, 910, 701 cm<sup>-1</sup>.

**HRMS (ESI):** *m/z* calculated for C<sub>23</sub>H<sub>24</sub>NO<sub>3</sub><sup>+</sup> [M+H]<sup>+</sup>: 362.1751; found: 362.1749.

**[ $\alpha$ ]<sub>D</sub><sup>21</sup>:** +201.8080° (*c* = 0.25 g/dL, CH<sub>2</sub>Cl<sub>2</sub>).

**(E)-3-(4-fluorophenyl)-1-phenylprop-2-en-1-one (S19):**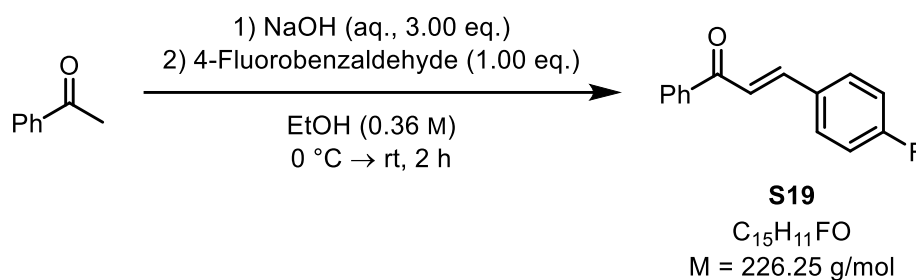

A solution of acetophenone (0.97 mL, 8.3 mmol, 1.0 eq.) in ethanol (23 mL, 0.36 M) was cooled down to 0 °C. NaOH (2.5 M, aq., 10 mL, 25 mmol, 3.0 eq.) was added dropwise over 20 minutes. The reaction was warmed to room temperature and stirred for one hour. 4-Fluorobenzaldehyde (0.89 mL, 8.3 mmol, 1.00 eq.) was then added dropwise over five minutes. After completion of the reaction (reaction control via TLC), ice cold water (10 mL) was added. The participate was filtered of, washed with ice cold Pentane (3 × 3 mL) and dried under reduced pressure to obtain the title compound as white solid (1.64 g, 7.25 mmol, 86%).

**M.P.** = 82–84 °C

**<sup>1</sup>H NMR (300 MHz, CDCl<sub>3</sub>):** δ (ppm): 8.03–8.00 (m, 2H), 7.78 (d, *J* = 15.8, 1H), 7.76–7.57 (m, 3H), 7.54–7.44 (m, 3H), 7.12 (t, *J* = 8.66 Hz, 2H).

**<sup>13</sup>C{<sup>1</sup>H} NMR (101 MHz, CDCl<sub>3</sub>):** δ (ppm): 190.5 (1C), 165.5–163.0 (d, *J* = 251.8 Hz, 1C), 143.7 (1C), 138.3 (1C), 133.1 (1C), 131.3 (1C), 130.5 (d, *J* = 8.7 Hz, 2C), 128.8 (2C), 128.6 (2C), 122.0 (d, *J* = 2.5 Hz, 1C), 116.3 (d, *J* = 21.8 Hz, 2C).

**<sup>19</sup>F{<sup>1</sup>H} NMR (282 MHz, CDCl<sub>3</sub>):** δ (ppm): -109.07.

**IR (ATR):**  $\nu_{\max}$  = 3057, 1659, 1600, 1587, 1211, 1156, 980, 825, 686, 503 cm<sup>-1</sup>.

**HRMS(ESI):** *m/z* calculated for C<sub>15</sub>H<sub>11</sub>FONa<sup>+</sup> [M+Na]<sup>+</sup>: 249.0686; found: 249.0684.

**3-(4-Fluorophenyl)-1-phenylpent-4-en-1-one (S20):**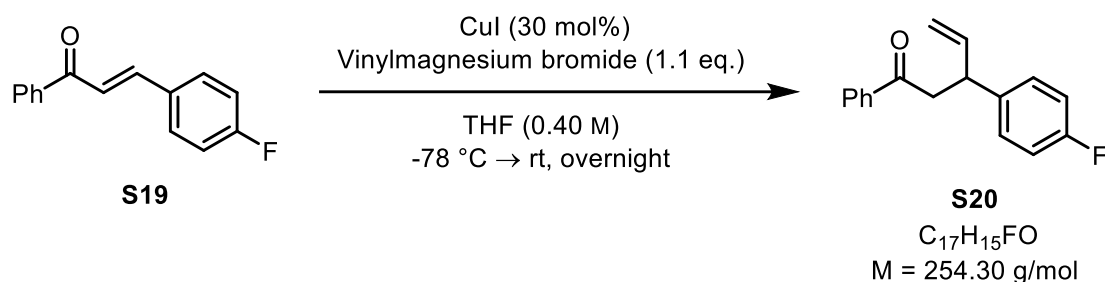

THF (5 mL, 0.4 M) was added to a flask charged with chalcone **S19** (453 mg, 2.00 mmol, 1.00 eq.) and CuI (114 mg, 0.600 mmol, 30.0 mol%). The suspension was stirred for 15 minutes at room temperature before being cooled to  $-78\text{ }^{\circ}\text{C}$ . Vinyl magnesium bromide (0.1 M in THF, 22 mL, 2.2 mmol, 1.1 eq.) was added dropwise over two hours and the suspension was allowed to warm to room temperature overnight.  $\text{NH}_4\text{Cl}$  (sat., aq., 10 mL) was added and the aqueous phase was extracted with EtOAc ( $3 \times 15 \text{ mL}$ ). The combined organic phases were washed with  $\text{NH}_4\text{Cl}$  (sat., aq., 10 mL) and brine (5 mL), dried over anhydrous  $\text{Na}_2\text{SO}_4$ , filtered and concentrated *in vacuo* before being purified by column chromatography ( $\text{SiO}_2$ ,  $\text{CH}_2\text{Cl}_2$ :Pentane 1:1) to afford the title compound as a white solid (209 mg, 0.852 mmol, 41%).

$R_f = 0.40$  ( $\text{CH}_2\text{Cl}_2$ :Pentane 1:1)

**M.P.** =  $31\text{--}37\text{ }^{\circ}\text{C}$

**$^1\text{H}$  NMR (300 MHz,  $\text{CDCl}_3$ ):**  $\delta$  (ppm): 7.97–7.87 (m, 2H), 7.58–7.53 (t,  $J = 7.4 \text{ Hz}$ , 1H), 7.56 (t,  $J = 7.4 \text{ Hz}$ , 2H), 7.45 (m, 2H), 6.98 (t,  $J = 8.8 \text{ Hz}$ , 2H), 6.03 (ddd,  $J = 17.0, 10.4, 6.6 \text{ Hz}$ , 1H), 5.10–4.99 (m, 2H), 4.13 (q,  $J = 7.0 \text{ Hz}$ , 1H), 3.46–3.30 (m, 2H).

**$^{13}\text{C}\{^1\text{H}\}$  NMR (101 MHz,  $\text{CDCl}_3$ ):**  $\delta$  (ppm): 198.2 (1C), 161.7 (d,  $J = 244.5 \text{ Hz}$ , 1C), 140.7 (1C), 138.9 (d,  $J = 3.3 \text{ Hz}$ , 1C), 137.2 (1C), 133.3 (1C), 129.4 (d,  $J = 8.0 \text{ Hz}$ , 2C), 128.8 (2C), 128.2 (2C), 115.5 (d,  $J = 21.4 \text{ Hz}$ , 2C), 115.0 (1C), 44.2(1C), 43.8 (1C).

**$^{19}\text{F}\{^1\text{H}\}$  NMR (282 MHz,  $\text{CDCl}_3$ ):**  $\delta$  (ppm):  $-116.59$ .

**IR (ATR):**  $\nu_{\text{max}} = 3046, 3058, 2899, 2362, 1685, 1508, 1221, 833, 689 \text{ cm}^{-1}$ .

**GCMS (EI):**  $m/z$  calculated for  $\text{C}_{17}\text{H}_{15}\text{FO}^+ [\text{M}]^+$  254.1101; found: 254.1101.



**1-Fluoro-4-(5-phenylhexa-1,5-dien-3-yl)benzene (1s):**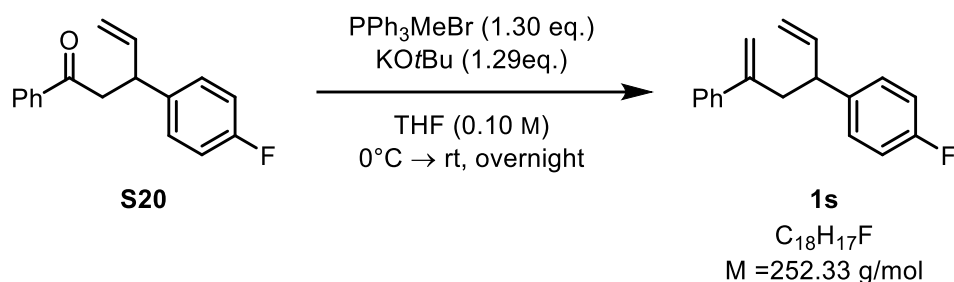

THF (4.5 mL, 0.10 M) was added to a flask charged with  $Ph_3PMeBr$  (209 mg, 0.585 mmol, 1.30 eq.) and  $KOtBu$  (65.1 mg, 0.580 mmol, 1.29 eq.) and the suspension was stirred for one hour at room temperature. The reaction was cooled down to 0 °C, ketone **S20** (114 mg, 0.450 mmol, 1.00 eq.) was added in one portion, and the reaction was allowed to warm to room temperature overnight.  $NH_4Cl$  (sat., aq., 10 mL) was added and the aqueous phase was extracted with  $EtOAc$  ( $3 \times 10 \text{ mL}$ ). The combined organic phases were washed with brine (5 mL), dried over anhydrous  $Na_2SO_4$ , filtered and concentrated *in vacuo* before being purified by column chromatography ( $SiO_2$ , Pentane) to afford the title compound as a colorless oil (84.5 mg, 0.332 mmol, 73%).

$R_f = 0.26$  (Pentane)

$^1H$  NMR (300 MHz,  $CDCl_3$ ):  $\delta$  (ppm): 7.37–7.27 (m, 5H), 7.05 (dd,  $J = 8.4, 5.9 \text{ Hz}$ , 2H), 6.95 (t,  $J = 8.8 \text{ Hz}$ , 2H), 5.95 (ddd,  $J = 17.3, 10.3, 7.1 \text{ Hz}$ , 1H), 5.19 (d,  $J = 1.6 \text{ Hz}$ , 1H), 5.03 (d,  $J = 10.3 \text{ Hz}$ , 1H), 4.94–4.88 (m, 2H), 3.38 (q,  $J = 7.4 \text{ Hz}$ , 1H), 2.99–2.80 (m, 2H).

$^{13}C\{^1H\}$  NMR (101 MHz,  $CDCl_3$ ):  $\delta$  (ppm): 162.7–160.3 (d,  $J = 243.8 \text{ Hz}$ , 1C), 146.2 (1C), 141.4 (1C), 14.1 (1C), 139.4 (d,  $J = 3.3 \text{ Hz}$ , 1C), 129.3 (d,  $J = 8.0 \text{ Hz}$ , 2C), 128.5 (2C), 127.6 (1C), 126.5 (2C), 115.3–115.1 (d,  $J = 21.1 \text{ Hz}$ , 2C), 115.0 (1C), 114.7 (1C), 47.0 (1C), 42.0 (1C).

$^{19}F\{^1H\}$  NMR (282 MHz,  $CDCl_3$ ):  $\delta$  (ppm): -117.11.

IR (ATR):  $\nu_{max} = 3081, 2928, 1634, 1603, 1508, 1222, 914, 900, 777, 534 \text{ cm}^{-1}$ .

GCMS (EI):  $m/z$  calculated for  $C_{18}H_{17}F^+ [M]^+$ : 252.1309; found: 252.1308.

**(E)-1-phenyl-3-(pyridin-3-yl)prop-2-en-1-one (S21):**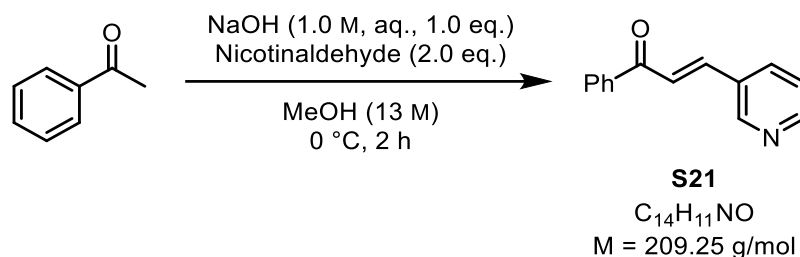

A solution of NaOH (1.0 M, aq., 13 mL, 13 mmol, 1.0 eq.) and MeOH (1.0 mL, 13 M) was cooled to 0 °C and nicotinaldehyde (2.4 mL, 26 mmol, 2.0 eq.) was added in one portion. Subsequently, acetophenone (1.5 mL, 13 mmol, 1.0 eq.) was added dropwise over 5 minutes. After two hours, ice cold water (20 mL) was added under strong stirring. The precipitate was filtered, washed with ice cold water (3 × 3 mL) and dried *in vacuo*. After recrystallisation from hot ethanol (approx. 5 mL), the title compound was obtained as pale yellow crystals (2.44 g, 12.8 mmol, 98%).

**M.P.** = 97–98 °C (EtOH)

**<sup>1</sup>H NMR (300 MHz, DMSO-*d*6):** δ (ppm): 9.03 (d, *J* = 2.4 Hz, 1H), 8.63–8.61 (m, 1H), 8.39–8.35 (m, 1H), 8.19–8.16 (m, 2H), 8.09 (d, *J* = 15.7 Hz, 1H), 7.78 (d, *J* = 15.8 Hz, 1H), 7.71–7.66 (m, 1H), 7.59 (t, *J* = 7.4 Hz, 2H), 7.50 (dd, *J* = 8.2, 4.5 Hz, 1H).

**<sup>13</sup>C{<sup>1</sup>H} NMR (101 MHz, DMSO-*d*6):** δ (ppm): 189.0 (1C), 151.0 (1C), 150.4 (1C), 140.6 (1C), 137.3 (1C), 135.1 (1C), 133.4 (1C), 130.5 (1C), 128.8 (2C), 128.6 (2C), 123.9 (1C), 123.9 (1C).

**IR (ATR):**  $\nu_{\max}$  = 3061, 3039, 1659, 1307, 1219, 1013, 766, 680, 573 cm<sup>-1</sup>.

**HRMS (ESI):** *m/z* calculated for C<sub>14</sub>H<sub>12</sub>NO<sup>+</sup> [M+H]<sup>+</sup> : 210.0913; found: 210.0914.

**1-Phenyl-3-(pyridin-3-yl)pent-4-en-1-one (S22):**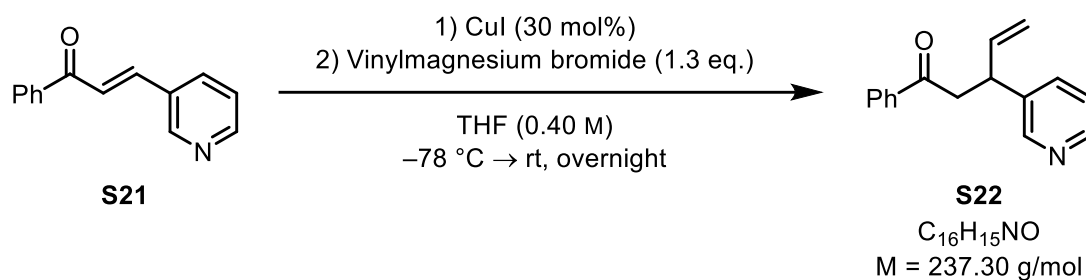

THF (5 mL, 0.4 M) was added to a flask charged with CuI (114 mg, 0.600 mmol, 30 mol%) and chalcone **S21** (419 mg, 2.00 mmol, 1.00 eq.). The suspension was stirred for 15 min. at room temperature and cooled to  $-78\text{ }^{\circ}\text{C}$ . Vinylmagnesium bromide (0.10 M in THF, 26 mL, 2.6 mmol, 1.3 eq.) was added dropwise over 2 h and the reaction was allowed to warm to room temperature overnight.  $\text{NH}_4\text{Cl}$  (sat., aq., 15 mL) and  $\text{H}_2\text{O}$  (10 mL) were added to the reaction mixture. The aqueous phase was extracted with EtOAc ( $3 \times 15\text{ mL}$ ). The combined organic phases were washed with  $\text{NH}_4\text{Cl}$  (sat., aq., 5 mL) and brine (5 mL), dried over anhydrous  $\text{Na}_2\text{SO}_4$ , filtered and concentratead *in vacuo*. After purification by column chromatography ( $\text{SiO}_2$ , Pentane:EtOAc 1:1), the title compound was obtained as a yellow oil (294 mg, 1.24 mmol, 61%).

**Note:** Not all aromatic proton and carbon resonances could be observed in the corresponding NMR spectra.

$R_f = 0.30$  (Pentane:EtOAc 1:1)

$^1\text{H NMR}$  (300 MHz,  $\text{CDCl}_3$ ):  $\delta$  (ppm): 7.94–7.91 (m, 2H), 7.68–7.30 (m, 6H), 6.10–5.99 (m, 1H), 5.12–5.03 (m, 2H), 4.23 (bs, 1H), 3.52–3.35 (m, 2H).

$^{13}\text{C}\{^1\text{H}\}$  NMR (101 MHz,  $\text{CDCl}_3$ ):  $\delta$  (ppm): 197.7 (1C), 139.9 (1C), 137.0 (1C), 135.3 (app., 1C), 133.4 (1C), 128.8 (2C), 128.7 (1C), 128.2 (2C), 126.2 (app., 1C), 115.9 (1C), 43.7 (1C), 42.4 (1C).

IR (ATR):  $\nu_{\text{max}} = 3082, 2879, 1674, 1593, 1410, 1259, 1203, 916, 749, 684, 607\text{ cm}^{-1}$ .

HRMS (ESI):  $m/z$  calculated for  $\text{C}_{16}\text{H}_{16}\text{NO}^+$   $[\text{M}+\text{H}]^+$  : 238.1226; found: 238.1232.

**3-(5-Phenylhexa-1,5-dien-3-yl)pyridine (1t):**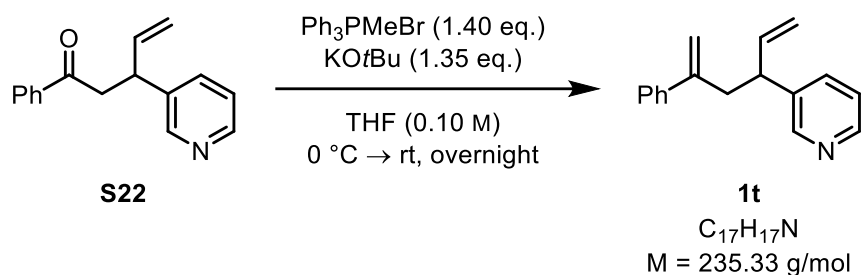

THF (4.5 mL, 0.10 M) was added to a flask charged with  $\text{Ph}_3\text{PMeBr}$  (225 mg, 0.630 mmol, 1.40 eq.) and  $\text{KOtBu}$  (68.2 mg, 0.607 mmol, 1.35 eq.) and the suspension was stirred for one hour at room temperature. The reaction was cooled down to 0 °C, ketone **S22** (107 mg, 0.450 mmol, 1.00 eq.) was added in one portion and the reaction was allowed to warm to room temperature overnight.  $\text{NH}_4\text{Cl}$  (sat., aq., 5 mL) was added and the aqueous phase was extracted with EtOAc (3 × 10 mL). The combined organic phases were washed with brine (5 mL), dried over anhydrous  $\text{Na}_2\text{SO}_4$ , filtered and the solvent was removed under reduced pressure. After purification by column chromatography ( $\text{SiO}_2$ , Pentane:EtOAc, 7:3 → 3:2), the title compound was obtained as colorless oil (69.0 mg, 0.293 mmol, 65%).

$R_f = 0.36$  (Pentane:EtOAc 3:2)

$^1\text{H NMR}$  (300 MHz,  $\text{CDCl}_3$ ):  $\delta$  (ppm): 8.45–8.43 (m, 1H), 8.32 (d,  $J = 2.5$  Hz, 1H), 7.44–7.40 (m, 1H), 7.34–7.28 (m, 5H), 7.22–7.18 (m, 1H), 6.03–5.92 (m, 1H), 5.19 (d,  $J = 1.6$  Hz, 1H), 5.08 (d,  $J = 10.3$  Hz, 1H), 4.96 (d,  $J = 17.1$  Hz, 1H), 4.90 (d,  $J = 1.3$  Hz, 1H), 3.42 (q,  $J = 6.9$  Hz, 1H), 3.02 (dd,  $J = 14.8, 7.8$  Hz, 1H), 2.85 (dd,  $J = 14.2, 8.2$  Hz, 1H).

$^{13}\text{C}\{^1\text{H}\}$  NMR (101 MHz,  $\text{CDCl}_3$ ):  $\delta$  (ppm): 149.8 (1C), 147.9 (1C), 145.9 (1C), 140.8 (1C), 140.4 (1C), 138.9 (1C), 135.4 (1C), 128.6 (2C), 127.7 (1C), 126.5 (2C), 123.4 (1C), 115.5 (1C), 115.4 (1C), 45.2 (1C), 41.7 (1C).

IR (ATR):  $\nu_{\text{max}} = 3080, 3028, 2929, 1635, 1424, 913, 779, 715 \text{ cm}^{-1}$ .

HRMS (ESI):  $m/z$  calculated for  $\text{C}_{17}\text{H}_{17}\text{NNa}^+$  [ $\text{M}+\text{Na}$ ] $^+$ : 258.1253; found: 258.1255.

**Ethyl 3-phenylhepta-2,6-dienoate (1u)**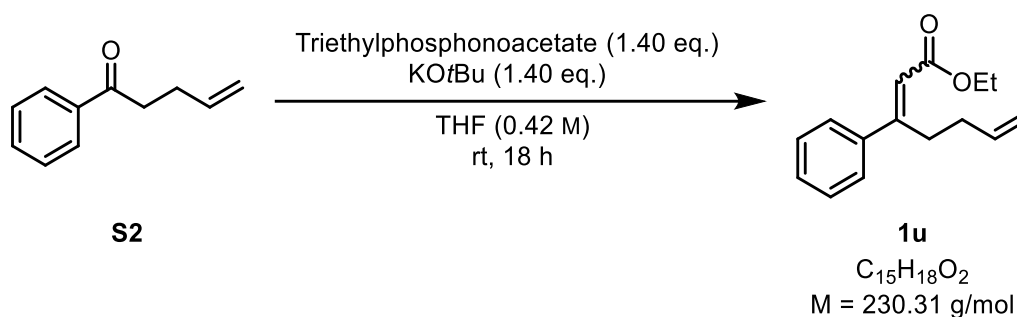

Triethyl phosphonoacetate (0.350 mL, 1.75 mmol, 1.40 eq.) was added to a solution of KOtBu (196 mg, 1.75 mmol, 1.40 eq.) in THF (3.0 mL, 0.42 M) and stirred for 30 minutes. Ketone **S2** (200 mg, 1.25 mmol, 1.00 eq.) was added dropwise and the mixture was stirred at room temperature for 18 hours. The solvent was removed *in vacuo* and the residue was redissolved in H<sub>2</sub>O (10 mL). The aqueous phase was extracted with EtOAc (3×15 mL) and the combined organic phases were washed with brine (10 mL) and H<sub>2</sub>O (10 mL), dried over Na<sub>2</sub>SO<sub>4</sub>, filtered, concentrated *in vacuo* before being purified by flash column chromatography (SiO<sub>2</sub>, 98:2 Pentane:EtOAc) to afford the title compound as an inseparable 98:2 (*E*:*Z*) mixture of geometric isomers and as a colourless oil (106 mg, 0.460 mmol, 36%).

$R_f = 0.31$  (98:2 Pentane:EtOAc)

**IR** (ATR):  $\nu_{\max} = 3075, 2979, 2935, 1723, 1700, 1638, 1220, 1154, 1035, 910, 696 \text{ cm}^{-1}$ .

**GCMS** (EI):  $m/z$  calculated for  $C_{15}H_{18}O_2Na^+$   $[M+Na]^+$  : 253.1199; found: 253.1204.

**Ethyl (*E*)-3-phenylhepta-2,6-dienoate:**

**<sup>1</sup>H NMR (300 MHz, CDCl<sub>3</sub>):**  $\delta$  (ppm) 7.49–7.30 (m, 3H), 7.17–7.14 (m, 2H), 5.89 (s, 1H), 5.84–5.71 (m, 1H), 5.04–5.00 (m, 2H), 3.98 (q,  $J = 7.2 \text{ Hz}$ , 2H), 2.54 (t,  $J = 7.6 \text{ Hz}$ , 2H), 2.14 (m, 2H), 1.06 (t,  $J = 7.2 \text{ Hz}$ , 3H).

**<sup>13</sup>C{<sup>1</sup>H} NMR (101 MHz, CDCl<sub>3</sub>):**  $\delta$  (ppm) 166.0 (1C), 158.6 (1C), 139.9 (1C), 137.1 (1C), 127.9 (2C), 127.6 (1C), 127.1 (2C), 117.7 (1C), 115.5 (1C), 59.8 (1C), 39.6 (1C), 31.4 (1C), 13.9 (1C).

**Ethyl (*Z*)-3-phenylhepta-2,6-dienoate:**

**<sup>1</sup>H NMR (300 MHz, CDCl<sub>3</sub>):**  $\delta$  (ppm) 7.38–7.30 (m, 3H), 7.17–7.14 (m, 2H), 6.04 (s, 1H), 5.84–5.71 (m, 1H), 5.04–5.00 (m, 2H), 4.21 (q,  $J = 7.2 \text{ Hz}$ , 2H), 3.20 (t,  $J = 7.6 \text{ Hz}$ , 2H), 3.08 (t,  $J = 7.2 \text{ Hz}$ , 2H), 1.31 (t,  $J = 7.2 \text{ Hz}$ , 3H).

**Methyl 4-hydroxy-2-methylene-5-phenylhex-5-enoate (1v):**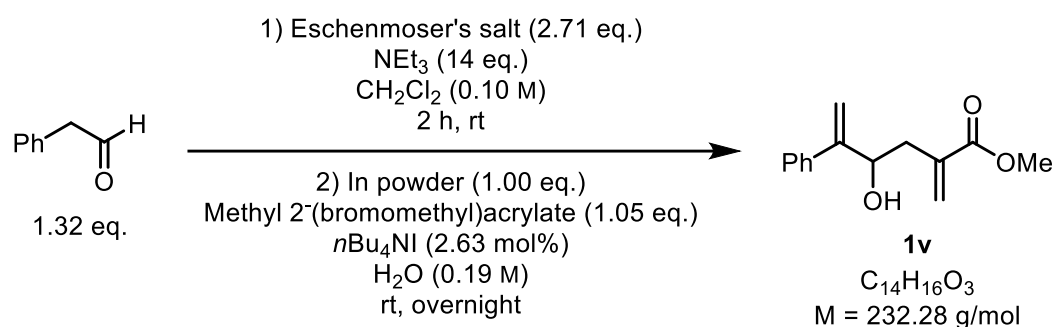

**Step 1:** To a suspension of Eschenmoser's salt (1.90 g, 10.3 mmol, 2.71 eq.) in CH<sub>2</sub>Cl<sub>2</sub> (50 mL, 0.10 M), 2-phenylacetaldehyde (601 mg, 5.00 mmol, 1.32 eq.) and NEt<sub>3</sub> (7.1 mL, 52 mmol, 14 eq.) were added. The solution was stirred for 2 h at room temperature and washed with NaHCO<sub>3</sub> (2 × 20 mL) and brine (10 mL). The organic phase was dried over anhydrous Na<sub>2</sub>SO<sub>4</sub>, filtered and the solvent was removed under reduced pressure (the water bath temperature was kept at 0 °C to reduce polymerisation).

**Step 2:** Water (20 mL, 0.19 M) was added to the pale yellow residue, followed by *n*Bu<sub>4</sub>NI (36.9 mg, 0.100 mmol, 2.63 mol%), methyl 2-(bromomethyl)acrylate (680 mg, 3.80 mmol, 1.00 eq.) and In powder (459 mg, 4.00 mmol, 1.05 eq.). The reaction was stirred at room temperature overnight. The aqueous phase was extracted with CH<sub>2</sub>Cl<sub>2</sub> (3 × 15 mL). The combined organic phases were washed with brine (10 mL), dried over anhydrous Na<sub>2</sub>SO<sub>4</sub>, filtered and the solvent was removed under reduced pressure. After purification by column chromatography (SiO<sub>2</sub>, 4:1 Pentane:EtOAc), the title compound was isolated as yellow oil (212 mg, 0.914 mmol, 18%).

*R<sub>f</sub>* = 0.36 (Pentane:EtOAc 4:1)

**<sup>1</sup>H NMR (300 MHz, CDCl<sub>3</sub>):** δ (ppm): 7.44–7.29 (m, 5H), 6.23 (d, *J* = 1.5 Hz, 1H), 5.55 (d, *J* = 1.2 Hz, 1H), 5.42 (t, *J* = 1.4 Hz, 1H), 5.36 (s, 1H), 4.87 (d, *J* = 6.0 Hz, 1H), 3.77 (s, 3H), 2.72 (ddd, *J* = 14.3, 3.4, 1.3 Hz, 1H), 2.39 (ddd, *J* = 14.3, 8.5, 1.0 Hz, 1H).

**<sup>13</sup>C{<sup>1</sup>H} NMR (101 MHz, CDCl<sub>3</sub>):** δ (ppm): 168.6 (1C), 150.9 (1C), 139.8 (1C), 137.0 (1C), 128.6 (1C), 128.6 (2C), 127.9 (1C), 127.0 (2C), 112.9 (1C), 72.3 (1C), 52.3 (1C), 39.7 (1C).

**IR (ATR):** *v*<sub>max</sub> = 3464, 3058, 3030, 2951, 2360, 2342, 1715, 1440, 1204, 1146, 779, 669 cm<sup>-1</sup>.

**HRMS (ESI):** *m/z* calculated for C<sub>14</sub>H<sub>16</sub>O<sub>3</sub>Na<sup>+</sup> [M+Na]<sup>+</sup>: 255.0992; found: 255.1003.

**4-Methyl-1-phenyl-3-(pyridin-3-yl)pent-4-en-1-one (S23):**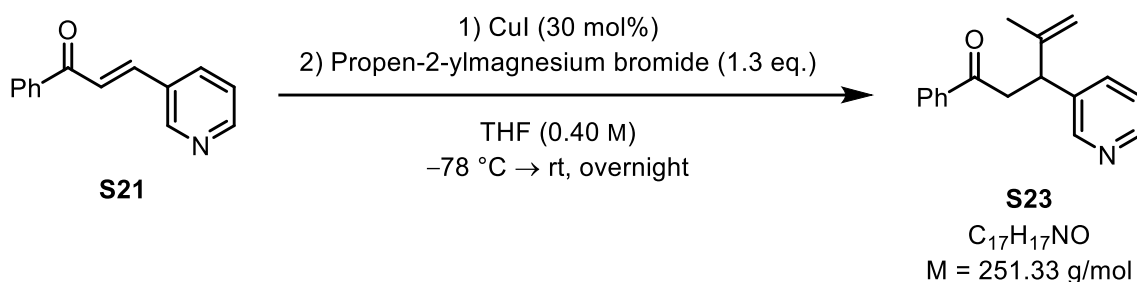

THF (5 mL, 0.4 M) was added to a flask charged with CuI (114 mg, 0.60 mmol, 30 mol%) and chalcone **S21** (419 mg, 2.00 mmol, 1.00 eq.). The suspension was stirred for 15 min. at room temperature and cooled to -78 °C. Propen-2-ylmagnesiumbromide (0.10 M in THF, 26 mL, 2.6 mmol, 1.3 eq.) was added dropwise over 2 h and the reaction was allowed to warm to room temperature overnight. NH<sub>4</sub>Cl (sat., aq., 5 mL) and H<sub>2</sub>O (15 mL) were added to the reaction mixture. The aqueous phase was extracted with EtOAc (3 × 15 mL). The combined organic phases were washed with NaHCO<sub>3</sub> (sat., aq., 10 mL) and brine (5 mL), dried over anhydrous Na<sub>2</sub>SO<sub>4</sub>, filtered and concentrated *in vacuo* before being purified by flash column chromatography (SiO<sub>2</sub>, Pentane:EtOAc 1:1) to afford the title compound as a pale yellow solid (149 mg, 0.734 mmol, 36%).

*R<sub>f</sub>* = 0.28 (Pentane:EtOAc 1:1)

**M.P.** = 54–56 °C

**<sup>1</sup>H NMR (300 MHz, CDCl<sub>3</sub>):** δ (ppm): 8.51 (d, *J* = 25.4 Hz, 2H), 7.93–7.91 (m, 2H), 7.62–7.53 (m, 2H), 7.45 (t, *J* = 7.5 Hz, 2H), 7.25–7.20 (m, 1H), 4.93 (d, *J* = 8.4 Hz, 2H), 4.08 (t, *J* = 7.0 Hz, 1H), 3.57 (dd, *J* = 17.1, 6.9 Hz, 1H), 3.38 (dd, *J* = 17.1, 6.9 Hz, 1H), 1.68 (s, 3H).

**<sup>13</sup>C{<sup>1</sup>H} NMR (101 MHz, CDCl<sub>3</sub>):** δ (ppm): 197.8 (1C), 149.7 (1C), 148.1 (1C), 146.2 (1C), 138.3 (1C), 137.0 (1C), 135.6 (1C), 133.4 (1C), 128.8 (2C), 128.1 (2C), 123.6 (1C), 111.4 (1C), 45.1 (1C), 42.8 (1C), 22.2 (1C).

**IR (ATR):** *v*<sub>max</sub> = 3084, 2969, 2918, 2360, 2340, 1685, 1448, 1206, 716, 690, 573 cm<sup>-1</sup>.

**HRMS (ESI):** *m/z* calculated for C<sub>17</sub>H<sub>18</sub>NO<sup>+</sup> [M+H]<sup>+</sup> 52.1383; found: 252.1382.

**3-(2-Methyl-5-phenylhexa-1,5-dien-3-yl)pyridine (1x):**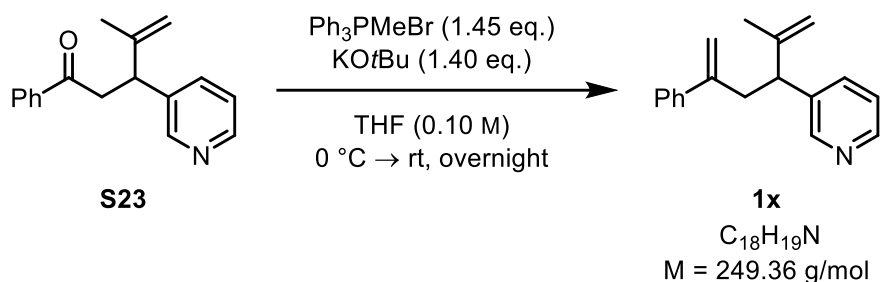

THF (5.5 mL, 0.10 M) was added to a flask charged with  $Ph_3PMeBr$  (275 mg, 0.770 mmol, 1.45 eq.) and  $KOtBu$  (83.3 mg, 0.742 mmol, 1.40 eq.) and the suspension was stirred for one hour at room temperature. The reaction was cooled down to 0 °C, ketone **S23** (133 mg, 0.530 mmol, 1.00 eq.) was added in one portion and the reaction was allowed to warm to room temperature overnight.  $NH_4Cl$  (sat., aq., 5 mL) and water (5 mL) were added and the aqueous phase was extracted with  $EtOAc$  ( $3 \times 10 \text{ mL}$ ). The combined organic phases were washed with brine (5 mL), dried over anhydrous  $Na_2SO_4$ , filtered concentrated *in vacuo* before being purified by column chromatography ( $SiO_2$ , Pentane: $EtOAc$ , 7:3) to afford the title compound as a pale orange oil (85.2 mg, 0.342 mmol, 64%).

$R_f = 0.29$  (Pentane: $EtOAc$  7:3)

$^1H$  NMR (300 MHz,  $CDCl_3$ ):  $\delta$  (ppm): 8.43 (dd,  $J = 4.7, 1.7 \text{ Hz}$ , 1H), 8.31 (d,  $J = 2.5 \text{ Hz}$ , 1H), 7.44 (dt,  $J = 8.0, 2.1 \text{ Hz}$ , 1H), 7.35–7.25 (m, 5H), 7.19 (dd,  $J = 8.0, 4.7 \text{ Hz}$ , 1H), 5.14 (d,  $J = 1.6 \text{ Hz}$ , 1H), 4.92 (s, 2H), 4.84 (s, 1H), 3.33 (dd,  $J = 9.1, 6.0 \text{ Hz}$ , 1H), 3.17 (dd,  $J = 13.4, 6.8 \text{ Hz}$ , 1H), 2.85 (dd,  $J = 14.2, 9.1 \text{ Hz}$ , 1H), 1.57 (s, 3H).

$^{13}C\{^1H\}$  NMR (101 MHz,  $CDCl_3$ ):  $\delta$  (ppm): 150.0 (1C), 147.8 (1C), 146.5 (1C), 146.2 (1C), 140.9 (1C), 138.3 (1C), 135.4 (1C), 128.6 (2C), 127.7 (1C), 126.5 (2C), 123.3 (1C), 115.2 (1C), 111.6 (1C), 48.2 (1C), 39.5 (1C), 21.6 (1C).

IR (ATR):  $\nu_{max} = 3081, 3027, 2940, 2362, 2340, 1646, 1422, 1026, 896, 778, 707, 562 \text{ cm}^{-1}$ .

HRMS (ESI):  $m/z$  calculated for  $C_{18}H_{20}N^+$   $[M+H]^+$ : 250.1590; found: 250.1584.



**(1-Allylcyclopentyl)(phenyl)methanone (S24)**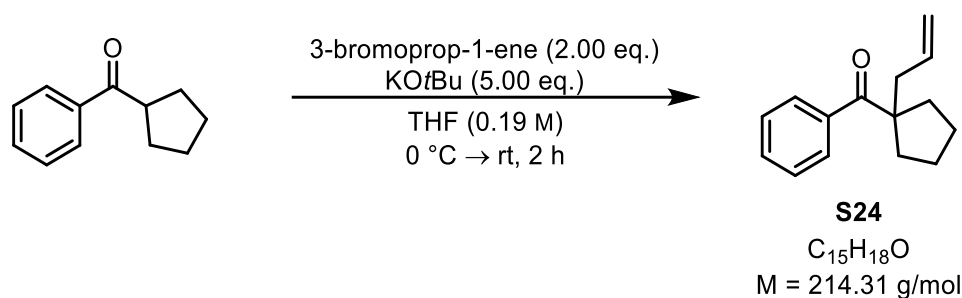

Cyclopentyl(phenyl)methanone (500 mg, 2.87 mmol, 1.00 eq.) was added to a solution of KOtBu (1.61 g, 14.4 mmol, 5.00 eq.) in THF (15.0 mL, 0.19 M) at 0 °C and stirred for 30 minutes. Vinyl bromide (694 mg, 5.74 mmol, 2.00 eq.) was then added dropwise, and the solution was warmed to room temperature. After 2 hours, HCl (1 M, aq.) was added until the pH < 0. The solvent was removed under reduced pressure and the residue was redissolved in EtOAc (137 mL), and the organic phase was washed with H<sub>2</sub>O (34 mL) and brine (34 mL), dried over anhydrous Na<sub>2</sub>SO<sub>4</sub>, filtered and concentrated *in vacuo* before being purified by flash column chromatography (SiO<sub>2</sub>, 99:1 Pentane:EtOAc) to obtain the title compound as a colourless oil (289 mg, 1.35 mmol, 47%).

*R*<sub>f</sub> = 0.29 (99:1 Pentane:EtOAc).

<sup>1</sup>H NMR (300 MHz, CDCl<sub>3</sub>): δ (ppm) 7.85 (d, *J* = 7.8 Hz, 2H), 7.51–7.38 (m, 3H), 5.66–5.52 (m, 1H), 4.96–4.83 (m, 2H), 2.60 (d, *J* = 7.3 Hz, 2H), 2.37–2.28 (m, 2H), 1.82–1.71 (m, 2H), 1.71–1.59 (m, 4H).

<sup>13</sup>C{<sup>1</sup>H} NMR (101 MHz, CDCl<sub>3</sub>): δ (ppm) 205.7 (1C), 137.2 (1C), 134.4 (1C), 131.8 (1C), 129.0 (2C), 128.3 (2C), 117.8 (1C), 58.9 (1C), 44.4 (1C), 36.0 (2C), 25.7 (2C).

IR (ATR):  $\nu_{\text{max}}$  = 3072, 2950, 2865, 1672, 1446, 1213, 914, 692 cm<sup>-1</sup>.

GCMS (ESI): *m/z* calculated for C<sub>15</sub>H<sub>18</sub>ONa<sup>+</sup> [M+Na]<sup>+</sup>: 237.1255; found: 237.1250.

**(1-(1-Allylcyclopentyl)vinyl)benzene (1y)**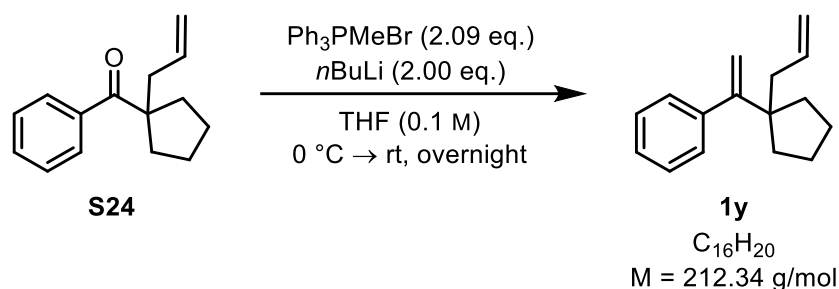

At room temperature, *n*BuLi (2.5 M in Hexane, 0.750 mL, 1.87 mmol, 2.00 eq.) was added slowly to a suspension of  $Ph_3PMeBr$  (697 mg, 1.95 mmol, 2.09 eq.) in THF (9.3 mL, 0.10 M). After stirring for one hour, the solution was cooled to 0 °C and ketone **S24** (200 mg, 0.933 mmol, 1.00 eq.) was added in one portion. The reaction mixture was warmed to room temperature and stirred overnight. The reaction was quenched by slow addition of  $NH_4Cl$  (sat., aq., 10 mL) and the aqueous phase was extracted with EtOAc (3×15 mL). The combined organic phases were washed with brine (10 mL), dried over anhydrous  $Na_2SO_4$ , filtered and concentrated *in vacuo* before being purified by flash column chromatography ( $SiO_2$ , Pentane) to afford the title compound as a colourless oil (159 mg, 0.750 mmol, 80%).

$R_f = 0.65$  (Pentane).

$^1H$  NMR (300 MHz,  $CDCl_3$ ):  $\delta$  (ppm) 7.31–7.20 (m, 5H), 5.89–5.75 (m, 1H), 5.11–4.97 (m, 4H), 2.17 (d,  $J = 7.1$  Hz, 2H), 1.78–1.63 (m, 6H), 1.59–1.54 (m, 2H).

$^{13}C\{^1H\}$  NMR (101 MHz,  $CDCl_3$ ):  $\delta$  (ppm) 155.6 (1C), 143.9 (1C), 136.2 (1C), 128.6 (2C), 127.7 (2C), 126.6 (1C), 116.5 (1C), 114.5 (1C), 52.0 (1C), 41.4 (1C), 36.6 (2C), 23.3 (2C).

IR (ATR):  $\nu_{max} = 3075, 2957, 2872, 2362, 1638, 1490, 902, 773, 700 \text{ cm}^{-1}$ .

GCMS (EI):  $m/z$  calculated for  $C_{16}H_{20}^+ [M]^+$ : 212.1; found: 212.1.

1-Ethyl 7-methyl (*E*)-6-methylene-3-phenylhept-2-enedioate (**1z**)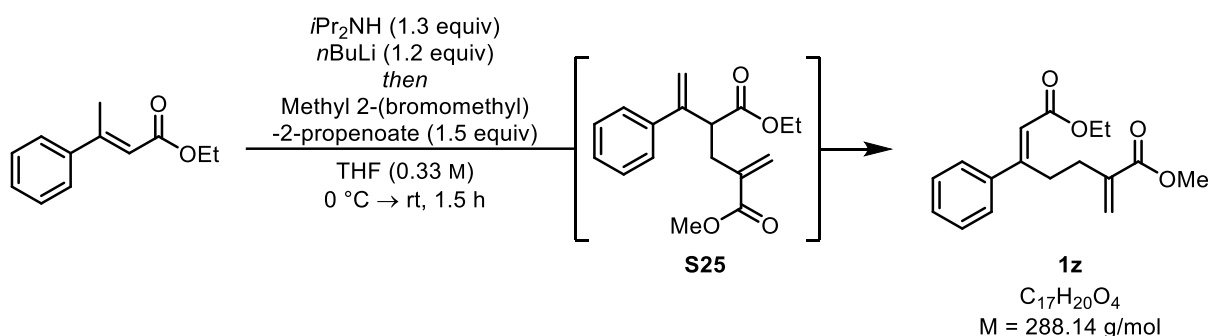

A solution of diisopropylamine (0.55 mL, 3.9 mmol, 1.3 eq.) in THF (9 mL, 0.3 M) was cooled to 0 °C. Under stirring, *n*BuLi (2.5 M in Hexanes, 1.44 mL, 3.60 mmol, 1.20 eq.) was added dropwise. After stirring at 0 °C for 30 minutes, ethyl (*E*)-3-phenylbut-2-enoate (0.55 mL, 3.0 mmol, 1.0 eq.) was added dropwise. After stirring at 0 °C for 1 hour, the reaction was cooled to –78 °C and methyl 2-(bromomethyl)-2-propenoate (0.54 mL, 4.5 mmol, 1.5 eq.) was added dropwise. The reaction was stirred for 15 minutes at –78 °C. The reaction was quenched by addition of HCl (1 M, aq., 6 mL) at –78 °C before being warmed to room temperature. The layers were separated and the aqueous layer was extracted with Et<sub>2</sub>O (3×20 mL). The combined organic layers were dried over anhydrous MgSO<sub>4</sub>, filtered, and concentrated *in vacuo* before being purified by flash column chromatography (SiO<sub>2</sub>, 95:5 Pentane:Et<sub>2</sub>O) to afford an inseparable mixture of **1z** and **S25** as a colourless oil (503 mg, 1.74 mmol, 58%). **S25** rearranged to **1z** over time at room temperature.

**1z** and **S25** could be separated by preparative HPLC (MeOH-H<sub>2</sub>O 70:30, Gradient to 100:0 in 30 min; 21.0 mL/min, 295 K)

Data for **1z**:

<sup>1</sup>H NMR (400 MHz, CDCl<sub>3</sub>): δ/ppm = 7.52–7.45 (m, 2H), 7.43–7.31 (m, 3H), 6.15 (d, *J* = 1.3 Hz, 1H), 6.09 (s, 1H), 5.58 (q, *J* = 1.4 Hz, 1H), 4.20 (q, *J* = 7.1 Hz, 2H), 3.73 (s, 3H), 3.33–3.25 (m, 2H), 2.50–2.41 (m, 2H), 1.31 (t, *J* = 7.1 Hz, 3H).

<sup>13</sup>C{<sup>1</sup>H} NMR (101 MHz, CDCl<sub>3</sub>): δ/ppm = 167.6 (1C), 166.5 (1C), 159.1 (1C), 140.9 (1C), 139.7 (1C), 129.2 (1C), 128.7 (2C), 126.9 (2C), 125.7 (1C), 118.2 (1C), 60.0 (1C), 51.9 (1C), 31.3 (1C), 29.9 (1C), 14.5 (1C).

IR (ATR): ν<sub>max</sub> = 2983, 2951, 1709, 1623, 1443, 1295, 1154, 1039, 770, 696 cm<sup>-1</sup>.

HRMS (ESI): calculated for C<sub>17</sub>H<sub>21</sub>O<sub>4</sub><sup>+</sup> [M+H]<sup>+</sup>: 289.1434; found: 289.436.

**Methyl 4-hydroxy-2-methylene-5-phenylhept-5-enoate (1aa)**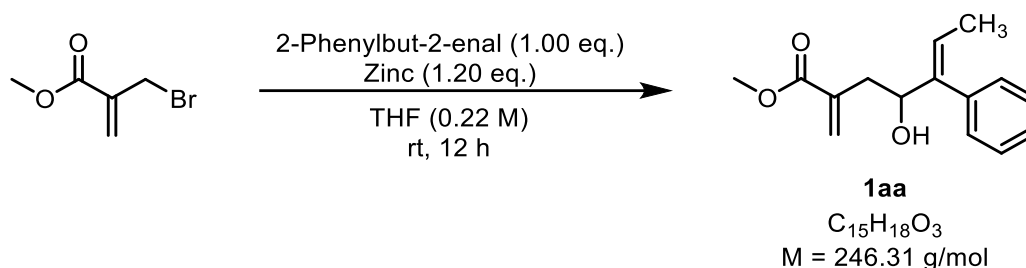

THF (9 mL, 0.2 M) was added to a mixture of 2-phenylbut-2-enal (292 mg, 2.00 mmol, 1.00 eq.), Methyl 2-(bromomethyl)-2-propenoate (356 mg, 2.00 mmol, 1.00 eq.), zinc (157 mg, 2.40 mmol, 1.20 eq.) and NH<sub>4</sub>Cl (sat., aq., 3 mL). The suspension was stirred at room temperature overnight. The organic phase was separated, and the aqueous phase was extracted with EtOAc (3×10 mL). The combined organic phases were washed with NH<sub>4</sub>Cl (sat., aq., 5 mL), dried over anhydrous Na<sub>2</sub>SO<sub>4</sub>, filtered, and concentrated *in vacuo* before being purified by flash column chromatography (SiO<sub>2</sub>, 75:25 Pentane:EtOAc) to afford the title compound as a colourless oil (446 mg, 1.81 mmol, 90%).

**R<sub>f</sub>** = 0.19 (75:25 Pentane:EtOAc)

**<sup>1</sup>H NMR (300 MHz, CDCl<sub>3</sub>):** δ (ppm) 7.38–7.27 (m, 3H), 7.19 (d, *J* = 7.3 Hz, 2H), 6.21 (s, 1H), 5.87 (q, *J* = 6.9 Hz, 1H), 5.56 (s, 1H), 4.52 (dd, *J* = 9.3, 3.2 Hz, 1H), 3.74 (s, 3H), 2.57 (dd, *J* = 14.3, 3.7 Hz, 1H), 2.31 (dd, *J* = 14.3, 8.7 Hz, 1H), 2.20 (br. s, 1H), 1.57 (d, *J* = 6.9 Hz, 3H).

**<sup>13</sup>C{<sup>1</sup>H} NMR (101 MHz, CDCl<sub>3</sub>):** δ (ppm) 168.5 (1C), 143.5 (1C), 138.2 (1C), 137.4 (1C), 129.5 (2C), 128.3 (2C), 128.1 (1C), 127.1 (1C), 123.1 (1C), 75.3 (1C), 52.2 (1C), 39.4 (1C), 14.4 (1C).

**IR (ATR):**  $\nu_{\text{max}}$  = 3426, 2950, 2910, 2854, 2355, 1712, 1438, 1198, 1139, 702 cm<sup>-1</sup>.

**GCMS (ESI):** *m/z* calculated for C<sub>15</sub>H<sub>18</sub>O<sub>3</sub>Na<sup>+</sup> [M+Na]<sup>+</sup>: 269.1154; found: 269.1148.

**(3,3,4,4-tetrafluorohexa-1,5-diene-2,5-diyl)dibenzene (1ab):**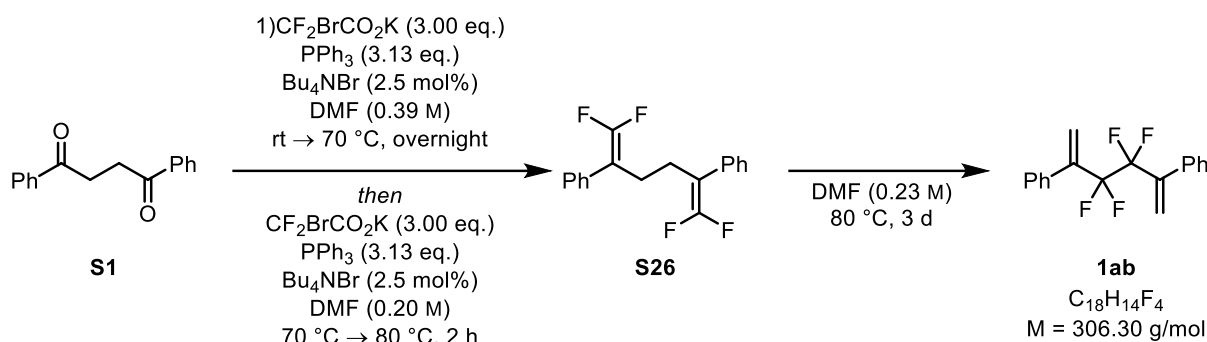

DMF (3.2 mL, 0.39 M) was added to a flask charged with ketone **S1** (300 mg, 1.26 mmol, 1.00 eq.),  $\text{CF}_2\text{BrCO}_2\text{K}$  (805 mg, 3.78 mmol, 3.00 eq.),  $\text{PPh}_3$  (1.03 g, 3.94 mmol, 3.13 eq.) and  $n\text{Bu}_4\text{NBr}$  (10.1 mg, 31.5  $\mu\text{mol}$ , 2.50 mol%). The reaction was heated slowly to 70 °C and stirred overnight. A suspension of  $\text{CF}_2\text{BrCO}_2\text{K}$  (805 mg, 3.78 mmol, 3.00 eq.),  $\text{PPh}_3$  (1.03 g, 3.94 mmol, 3.13 eq.),  $n\text{Bu}_4\text{NBr}$  (10.1 mg, 31.5  $\mu\text{mol}$ , 2.5 mol%) in DMF (3.2 mL, 1.18 M) was added dropwise over five minutes. After 30 minutes, the temperature was increased to 80 °C and the suspension was stirred for further 2 h. Water (60 mL) and EtOAc (20 mL) were added. The aqueous phase was extracted with EtOAc (3  $\times$  15 mL) and the combined organic phases were washed with HCl (1 M, aq., 10 mL), LiCl (5 w%, aq., 10 mL), brine (5 mL), dried over anhydrous  $\text{Na}_2\text{SO}_4$  and filtered. The solvent was removed under reduced pressure and the crude product was purified by column chromatography ( $\text{SiO}_2$ , Pentane:EtOAc 95:5).

The resulting colourless solid was dissolved in DMF (1.5 mL, 0.23 M) and stirred for three days at 80 °C. Water (15 mL) was added and the aqueous phase was extracted with  $\text{Et}_2\text{O}$  (3  $\times$  5 mL). The combined organic phases were washed with HCl (1 M, aq., 5 mL), LiCl (5 w%, aq., 5 mL), dried over anhydrous  $\text{Na}_2\text{SO}_4$  and filtered. The solvent was removed under reduced pressure and the product was obtained as a low melting and inseparable mixture of the title compound with diene **S26** (97:3, 99.1 mg, 0.325 mmol, 25%)

$R_f = 0.18$  (Pentane)

$^1\text{H NMR}$  (300 MHz,  $\text{CDCl}_3$ ):  $\delta$  (ppm): 7.36–7.28 (m, 10H), 5.82 (s, 2H), 5.63 (s, 2H).

$^{13}\text{C}\{^1\text{H}\}$  NMR (101 MHz,  $\text{CDCl}_3$ ):  $\delta$  (ppm): 140.5 (2C), 136.5 (2C), 128.9 (4C), 128.4 (2C), 128.1 (4C), 124.1 (q,  $J = 5.2$ , 2C), 116.4 (2C).

$^{19}\text{F}\{^1\text{H}\}$  NMR (282 MHz,  $\text{CDCl}_3$ ):  $\delta$  (ppm): –107.84.

IR (ATR):  $\nu_{\text{max}} = 3086, 3071, 3055, 3036, 3022, 1902, 1677, 1493, 1445, 1393, 1228, 1165, 1088, 948, 695 \text{ cm}^{-1}$ .

GCMS (EI):  $m/z$  calculated for  $\text{C}_{18}\text{H}_{14}\text{F}_4^+ [\text{M}]^+$ : 306.1026; found: 306.1024.

### 6.3 Synthesis of BCH 2a–ab.

#### 1,4-Diphenylbicyclo[2.1.1]hexane (2a)

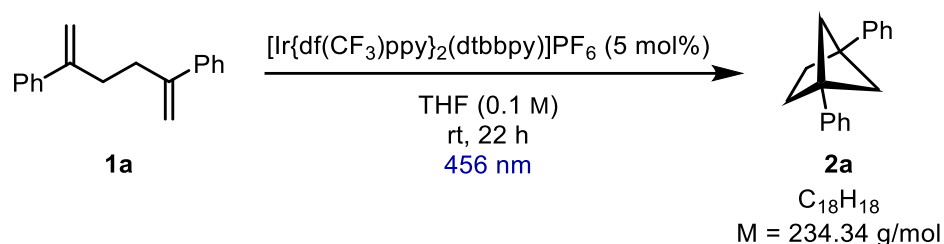

#### 0.19 mmol scale:

Prepared according to **GP1** using diene **1a** (44.5 mg, 0.190 mmol),  $[\text{Ir}\{\text{df}(\text{CF}_3)\text{ppy}\}_2(\text{dtbbpy})]\text{PF}_6$  (10.5 mg, 9.36  $\mu\text{mol}$ , 5 mol%), and THF (1.9 mL, 0.1 M). Purification by flash column chromatography ( $\text{SiO}_2$ , Pentane) afforded the title compound as colourless crystals (41.9 mg, 0.179 mmol, 94%).

#### 1.00 mmol scale:

A 10 mL Schlenk tube was charged with diene **1a** (234 mg, 1.00 mmol),  $[\text{Ir}\{\text{df}(\text{CF}_3)\text{ppy}\}_2(\text{dtbbpy})]\text{PF}_6$  (56.1 mg, 50.0  $\mu\text{mol}$ , 5 mol%), and THF (10 mL, 0.1 M) and subsequently deoxygenated by three freeze-pump-thaw cycles. The reaction was irradiated with 456 nm LEDs for 66 hours at room temperature under strong stirring. The reaction was concentrated *in vacuo* and directly purified by flash column chromatography ( $\text{SiO}_2$ , Pentane) to afford the title compound as a colourless solid (215 mg, 917  $\mu\text{mol}$ , 91%).

$R_f$  = 0.26 (Pentane).

**M.P.** = 70–72 °C ( $\text{CH}_2\text{Cl}_2$ )

$^1\text{H NMR}$  (300 MHz,  $\text{CDCl}_3$ ):  $\delta/\text{ppm}$  = 7.37–7.30 (m, 8H), 7.24–7.19 (m, 2H), 2.09 (s, 4H), 2.02–1.98 (m, 4H).

$^{13}\text{C}\{^1\text{H}\}$  NMR (101 MHz,  $\text{CDCl}_3$ ):  $\delta/\text{ppm}$  = 144.2 (2C), 128.4 (4C), 126.2 (2C), 126.1 (4C), 51.1 (2C), 47.7 (2C), 35.3 (2C).

**IR** (ATR):  $\nu_{\text{max}}$  = 3059, 3028, 2946, 2926, 2863, 1602, 1494, 1446, 1354, 1320, 1193, 1171, 1073, 1027, 987, 895, 829, 755, 693, 668, 635, 545, 532  $\text{cm}^{-1}$ .

**GCMS** (EI): calculated for  $\text{C}_{18}\text{H}_{18}^+$   $[\text{M}]^+$ : 234.1; found: 234.1.

**1-Phenylbicyclo[2.1.1]hexane (2b)**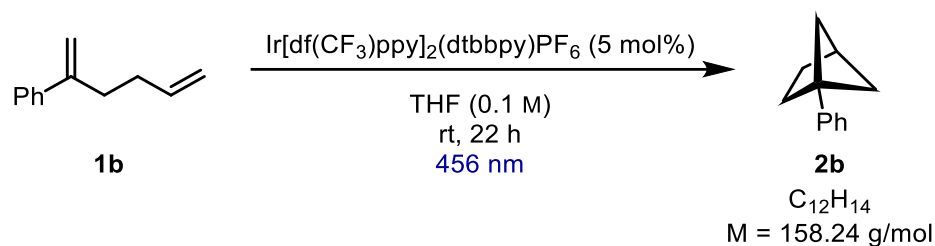

Prepared according to **GP1** using diene **1b** (31.6 mg, 0.200 mmol),  $[\text{Ir}\{\text{df}(\text{CF}_3)\text{ppy}\}_2(\text{dtbbpy})]\text{PF}_6$  (11.2 mg, 9.36  $\mu\text{mol}$ , 5 mol%), and THF (2 mL, 0.1 M). Purification by flash column chromatography ( $\text{SiO}_2$ , Pentane) afforded the title compound as a colourless oil (27.4 mg, 0.173 mmol, 86%).

CAUTION: product proved to be volatile at low pressures and solvent was removed at 35 °C, 300–350 mbar.

$R_f = 0.36$  (Pentane).

$^1\text{H NMR}$  (300 MHz,  $\text{CDCl}_3$ ):  $\delta/\text{ppm} = 7.34\text{--}7.33$  (m, 2H), 7.27–7.24 (m, 2H), 7.20–7.17 (m, 1H), 2.55–2.53 (m, 1H), 1.87–1.82 (m, 4H), 1.77 (bs, 2H), 1.46 (dd,  $J = 4.03, 1.98$  Hz, 2H).

$^{13}\text{C}\{^1\text{H}\}$  NMR (101 MHz,  $\text{CDCl}_3$ ):  $\delta/\text{ppm} = 144.9$  (1C), 128.2 (2C), 126.0 (2C), 126.0 (1C), 54.3 (1C), 43.4 (2C), 36.6 (1C), 33.5 (1C), 28.9 (1C).

IR (ATR):  $\nu_{\text{max}} = 2963, 2869, 1604, 1498, 1446, 1335, 1283, 1202, 1068, 1021, 822, 753, 696, 538$   $\text{cm}^{-1}$ .

GCMS (EI): calculated for  $\text{C}_{12}\text{H}_{14}^+$   $[\text{M}]^+$ : 158.1; found: 158.1.

**1,4-Bis(4-(trifluoromethyl)phenyl)bicyclo[2.1.1]hexane (2c)**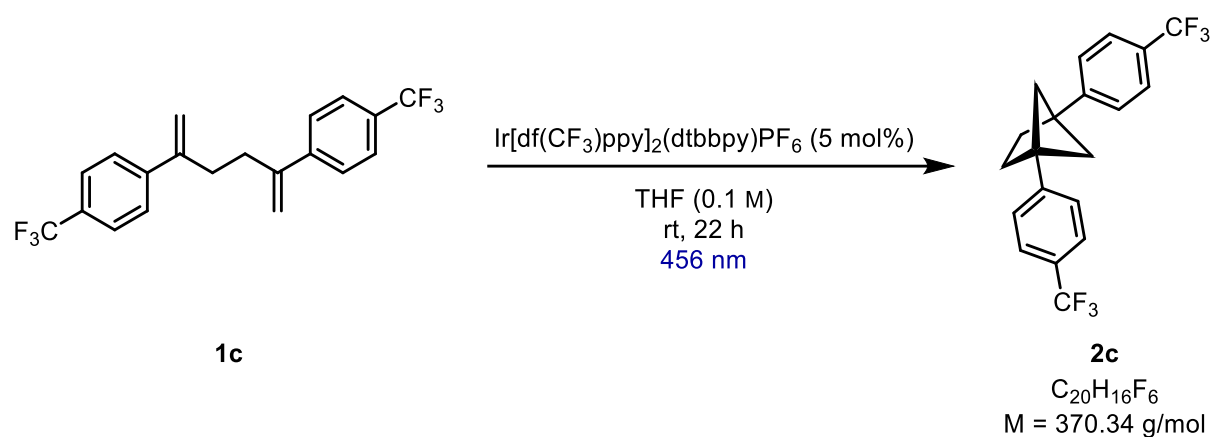

Prepared according to **GP1** using diene **1c** (66.7 mg, 0.190 mmol), [Ir{df(CF<sub>3</sub>)ppy}<sub>2</sub>(dtbbpy)]PF<sub>6</sub> (10.2 mg, 9.00 μmol, 5 mol%), and THF (1.9 mL, 0.1 M). Purification by flash column chromatography (SiO<sub>2</sub>, Pentane) afforded the title compound as colourless crystals (38.9 mg, 0.105 mmol, 58%).

*R<sub>f</sub>* = 0.30 (Pentane).

**M.P.** = 76–77 °C (CH<sub>2</sub>Cl<sub>2</sub>)

**<sup>1</sup>H NMR** (300 MHz, CDCl<sub>3</sub>): δ/ppm = 7.59 (d, *J* = 8.36 Hz, 4H), 7.39 (d, *J* = 8.26 Hz, 4H), 2.12 (s, 4H), 2.05–2.02 (m, 4H).

**<sup>13</sup>C{<sup>1</sup>H} NMR** (101 MHz, CDCl<sub>3</sub>): δ/ppm = 147.7 (2C), 128.9 (4C), 128.5 (4C), 126.4 (2C), 125.5–125.3 (q, *J* = 3.8 Hz, 2C), 51.1 (2C), 47.6 (2C), 35.3 (2C).

**<sup>19</sup>F{<sup>1</sup>H} NMR** (282 MHz, CDCl<sub>3</sub>): δ/ppm = 62.36.

**IR** (ATR): ν<sub>max</sub> = 2953, 2920, 2874, 1617, 1411, 1321, 1194, 1165, 1118, 1105, 1066, 1016, 990, 956, 862, 833, 697, 602, 518 cm<sup>-1</sup>.

**GCMS** (EI): calculated for C<sub>20</sub>H<sub>16</sub>F<sub>6</sub><sup>+</sup> [M]<sup>+</sup>: 370.1; found: 370.0.



**4,4'-(Bicyclo[2.1.1]hexane-1,4-diyl)dibenzaldehyde (2d)**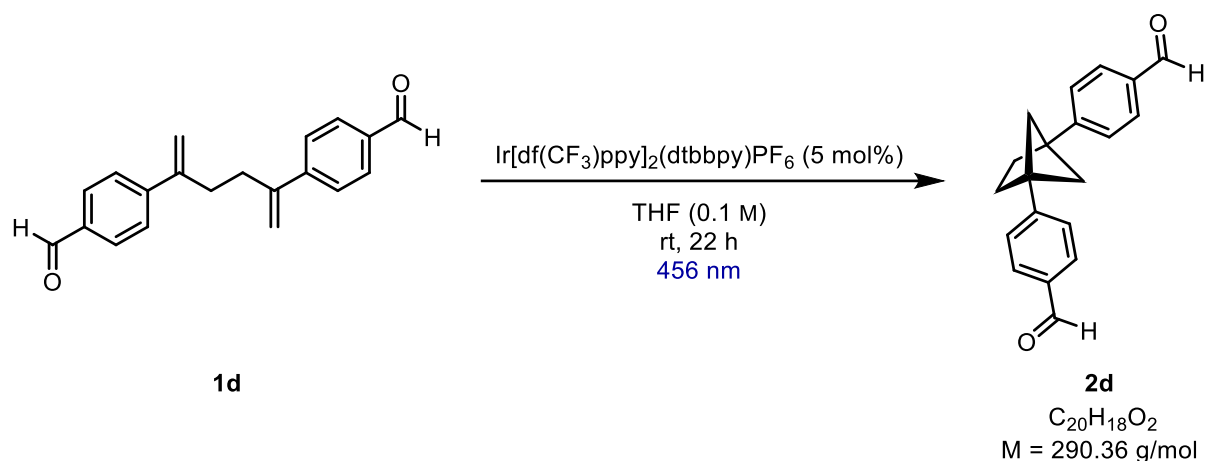

Prepared according to **GP1** using diene **1d** (58.1 mg, 0.200 mmol),  $[\text{Ir}\{\text{df}(\text{CF}_3)\text{ppy}\}_2(\text{dtbbpy})]\text{PF}_6$  (11.2 mg, 9.36  $\mu\text{mol}$ , 5 mol%), and THF (2 mL, 0.1 M). Purification by flash column chromatography ( $\text{SiO}_2$ , 13:6 Pentane:EtOAc) afforded the title compound as a colourless solid (33.5 mg, 0.115 mmol, 57%).

$R_f$  = 0.30 (13:6 Pentane:EtOAc).

**M.P.** = 85–89 °C ( $\text{CH}_2\text{Cl}_2$ )

$^1\text{H NMR}$  (300 MHz,  $\text{CDCl}_3$ ):  $\delta/\text{ppm}$  = 10.00 (s, 2H), 7.87–7.84 (m, 4H), 7.46–7.44 (m, 4H), 2.15 (s, 4H), 2.11–2.07 (m, 4H).

$^{13}\text{C}\{^1\text{H}\}$  NMR (101 MHz,  $\text{CDCl}_3$ ):  $\delta/\text{ppm}$  = 192.1 (2C), 150.9 (2C), 134.9 (2C), 130.1 (4C), 126.7 (4C), 51.5 (2C), 47.7 (2C), 35.4 (2C).

**IR** (ATR):  $\nu_{\text{max}}$  = 2965, 2945, 2917, 2869, 2737, 1692, 1601, 1567, 1394, 1303, 1255, 1210, 1161, 1100, 986, 813, 686, 542  $\text{cm}^{-1}$ .

**HRMS** (ESI): calculated for  $\text{C}_{20}\text{H}_{18}\text{O}_2\text{Na}^+$   $[\text{M}+\text{Na}]^+$ : 313.1199; found: 313.1204.

**1,4-Bis(4-(4,4,5,5-tetramethyl-1,3,2-dioxaborolan-2-yl)phenyl)bicyclo[2.1.1]hexane (2e)**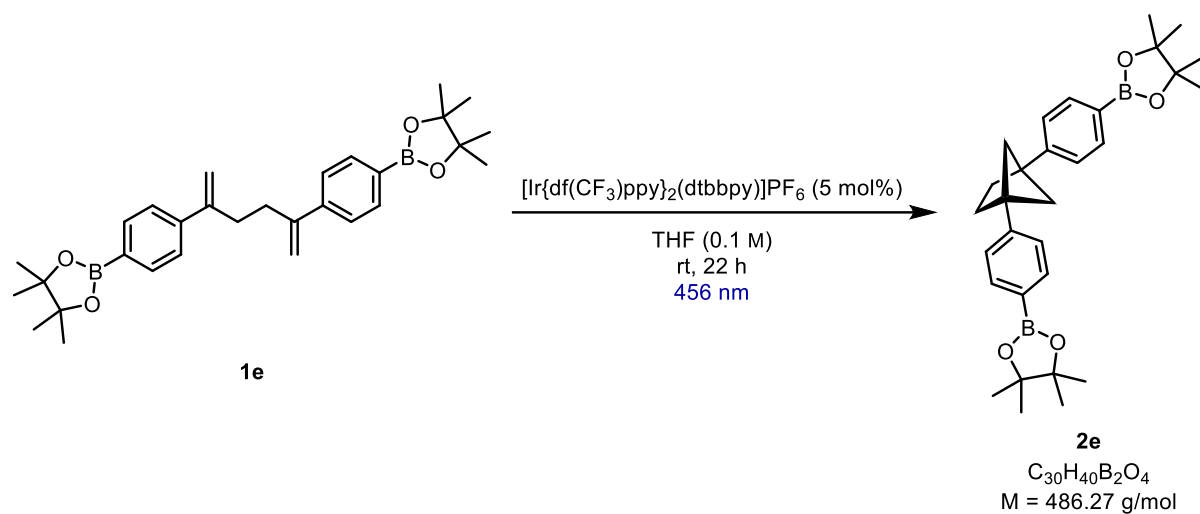

Prepared according to **GP1** using diene **1e** (97.4 mg, 0.200 mmol), [Ir{df(CF<sub>3</sub>)ppy}<sub>2</sub>(dtbbpy)]PF<sub>6</sub> (11.2 mg, 9.36 μmol, 5 mol%), and THF (2 mL, 0.1 M). Purification by flash column chromatography (SiO<sub>2</sub>, 475:25:1 Pentane:EtOAc:CH<sub>2</sub>Cl<sub>2</sub>) afforded the title compound as a colourless solid (97.2 mg, 0.200 mmol, quant.).

**M.P.** = 205–207 °C (CH<sub>2</sub>Cl<sub>2</sub>)

**<sup>1</sup>H NMR** (300 MHz, CDCl<sub>3</sub>): δ/ppm = 7.79–7.77 (m, 4H), 7.31–7.29 (m, 4H), 2.08 (s, 4H), 2.00 (s, 4H), 1.34 (s, 24H).

**<sup>13</sup>C{<sup>1</sup>H} NMR** (101 MHz, CDCl<sub>3</sub>): δ/ppm = 147.5 (2C), 135.0 (4C), 128.4 (2C), 125.5 (4C), 83.8 (4C), 51.4 (2C), 47.6 (2C), 35.4 (2C), 25.0 (8C).

**IR** (ATR): ν<sub>max</sub> = 2973, 2927, 2868, 1614, 1523, 1401, 1360, 1323, 1307, 1272, 1214, 1166, 1140, 1104, 1090, 1020, 997, 988, 961, 859, 827, 812, 746, 702, 676, 658, 639, 579, 534, 521 cm<sup>-1</sup>.

**HRMS** (ESI): calculated for C<sub>30</sub>H<sub>40</sub>B<sub>2</sub>O<sub>4</sub>Na<sup>+</sup> [M+Na]<sup>+</sup>: 507.3078; found: 507.3052.

**1,4-Bis(4-bromophenyl)bicyclo[2.1.1]hexane (2f)**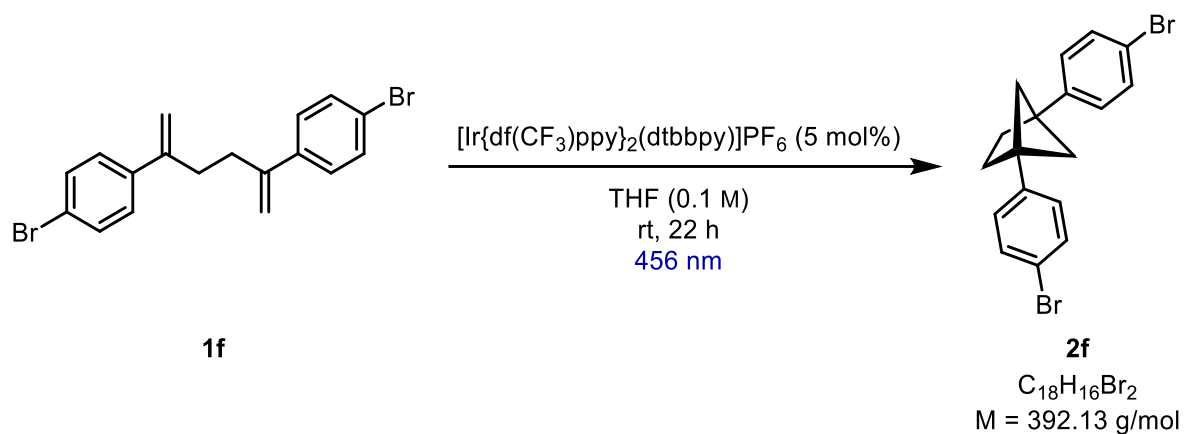

Prepared according to **GP1** using diene **1f** (78.4 mg, 0.200 mmol),  $[\text{Ir}\{\text{df}(\text{CF}_3)\text{ppy}\}_2(\text{dtbbpy})]\text{PF}_6$  (11.2 mg, 9.36  $\mu\text{mol}$ , 5 mol%), and THF (2 mL, 0.1 M). The title compound could not be isolated by flash column chromatography or recrystallization. The yield was estimated using 1,3,5-trimethoxybenzol as internal standard (50  $\mu\text{mol}$ , 25%).

$^1\text{H NMR}$  (300 MHz,  $\text{CDCl}_3$ ):  $\delta/\text{ppm}$  = 7.46–7.43 (m), 7.17–7.14 (m), 2.05 (s), 1.94 (s).

$^{13}\text{C}\{^1\text{H}\}$  NMR (101 MHz,  $\text{CDCl}_3$ ):  $\delta/\text{ppm}$  = 142.8 (2C), 131.4 (4C), 127.8 (4C), 112.0 (2C), 50.6 (2C), 47.6 (2C), 35.1 (2C).

**1,4-Bis(4-(trimethylsilyl)phenyl)bicyclo[2.1.1]hexane (2g)**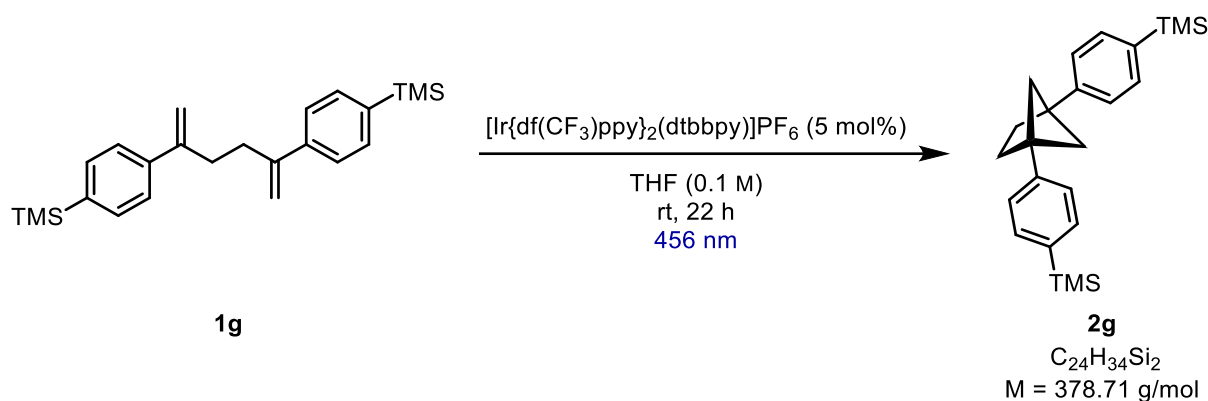

Prepared according to **GP1** using diene **1g** (75.7 mg, 0.200 mmol),  $[\text{Ir}\{\text{df}(\text{CF}_3)\text{ppy}\}_2(\text{dtbbpy})]\text{PF}_6$  (11.2 mg, 9.36  $\mu\text{mol}$ , 5 mol%), and THF (2 mL, 0.1 M). Purification by flash column chromatography ( $\text{SiO}_2$ , Pentane) afforded the title compound as colourless crystals (57.6 mg, 0.152 mmol, 76%).

$R_f$  = 0.23 (Pentane).

**M.P.** = 93–96°C ( $\text{CH}_2\text{Cl}_2$ )

$^1\text{H NMR}$  (300 MHz,  $\text{CDCl}_3$ ):  $\delta/\text{ppm}$  = 7.52–7.49 (m, 4H), 7.32–7.29 (m, 4H), 2.08 (s, 4H), 1.99–1.97 (m, 4H), –0.27 (s, 18H).

$^{13}\text{C}\{^1\text{H}\}$  NMR (101 MHz,  $\text{CDCl}_3$ ):  $\delta/\text{ppm}$  = 144.8 (2C), 138.0 (2C), 133.5 (4C), 125.5 (4C), 51.1 (2C), 47.6 (2C), 35.2 (2C), –0.9 (6C).

$^{29}\text{Si}\{^1\text{H}\}$  NMR (99 MHz,  $\text{CDCl}_3$ ):  $\delta/\text{ppm}$  = 4.32.

**IR** (ATR):  $\nu_{\text{max}}$  = 3067, 3017, 2955, 2866, 1597, 1389, 1318, 1249, 1110, 1077, 983, 827, 809, 752, 736, 719, 692, 623, 530  $\text{cm}^{-1}$ .

**HRMS** (ESI): calculated for  $\text{C}_{24}\text{H}_{35}\text{Si}_2^+$   $[\text{M}+\text{H}]^+$ : 379.2272; found: 379.2256.

**2,2'-((Bicyclo[2.1.1]hexane-1,4-diyl)bis(4,1-phenylene))bis(propan-2-ol) (2h)**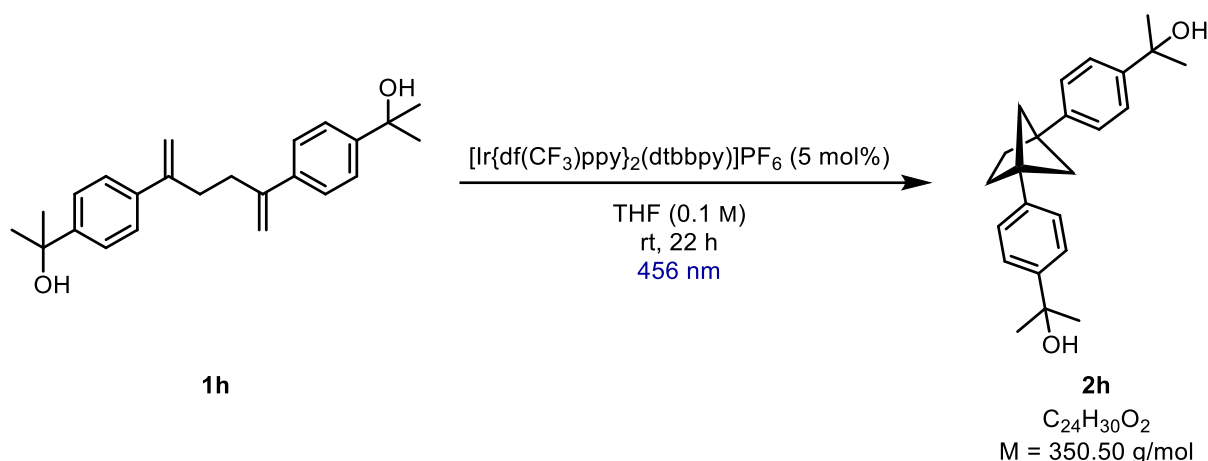

Prepared according to **GP1** using diene **1h** (70.1 mg, 0.200 mmol),  $[\text{Ir}\{\text{df}(\text{CF}_3)\text{ppy}\}_2(\text{dtbbpy})]\text{PF}_6$  (11.2 mg, 9.36  $\mu\text{mol}$ , 5 mol%), and THF (2 mL, 0.1 M). Purification by flash column chromatography ( $\text{SiO}_2$ , 13:6 Pentane:EtOAc) afforded the title compound as a colourless solid (59.7 mg, 0.170 mmol, 85%).

$R_f$  = 0.30 (13:6 Pentane:EtOAc).

**M.P.** = 115–117 °C ( $\text{CH}_2\text{Cl}_2$ )

**$^1\text{H}$  NMR** (300 MHz,  $\text{CDCl}_3$ ):  $\delta/\text{ppm}$  = 7.48–7.45 (m, 4H), 7.30–7.27 (m, 4H), 2.08 (s, 4H), 2.01–1.96 (m, 4H), 1.71 (s, 2H), 1.59 (s, 12H).

**$^{13}\text{C}\{\text{1H}\}$  NMR** (101 MHz,  $\text{CDCl}_3$ ):  $\delta/\text{ppm}$  = 147.1 (2C), 142.6 (2C), 126.0 (4C), 124.5 (4C), 72.6 (2C), 50.8 (2C), 47.9 (2C), 35.2 (2C), 31.9 (4C).

**IR** (ATR):  $\nu_{\text{max}}$  = 3288, 2973, 2929, 2866, 1512, 1461, 1399, 1377, 1361, 1262, 1169, 1150, 1096, 987, 957, 864, 840, 833, 825, 816, 705, 593, 571  $\text{cm}^{-1}$ .

**HRMS** (ESI): calculated for  $\text{C}_{24}\text{H}_{30}\text{O}_2\text{Na}^+$   $[\text{M}+\text{Na}]^+$ : 373.2138; found: 373.2147.

**1,4-Di-*p*-tolylbicyclo[2.1.1]hexane (2i)**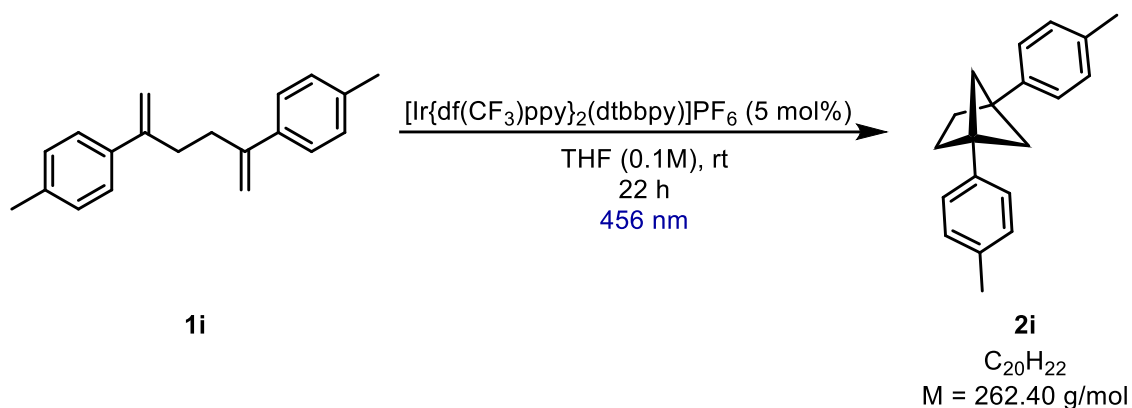

Prepared according to **GP1** using diene **1i** (49.9 mg, 0.190 mmol),  $[\text{Ir}\{\text{df}(\text{CF}_3)\text{ppy}\}_2(\text{dtbbpy})]\text{PF}_6$  (10.7 mg, 9.50  $\mu\text{mol}$ , 5 mol%), and THF (1.9 mL, 0.1 M). Purification by flash column chromatography ( $\text{SiO}_2$ , Pentane) afforded the title compound as a colourless solid (46.5 mg, 177  $\mu\text{mol}$ , 93%).

$R_f$  = 0.30 (Pentane).

**M.P.** = 79–81 °C ( $\text{CH}_2\text{Cl}_2$ )

**$^1\text{H}$  NMR (300 MHz,  $\text{CDCl}_3$ ):**  $\delta$  (ppm) 7.20 (d,  $J$  = 8.0 Hz, 4H), 7.14 (d,  $J$  = 8.3 Hz, 4H), 2.34 (s, 6H), 2.05 (s, 4H), 1.97–1.92 (m, 4H).

**$^{13}\text{C}\{^1\text{H}\}$  NMR (101 MHz,  $\text{CDCl}_3$ ):**  $\delta$  (ppm) 141.2 (2C), 135.7 (2C), 129.0 (4C), 126.0 (4C), 50.7 (2C), 47.8 (2C), 35.2 (2C), 21.2 (2C).

**IR (ATR):**  $\nu_{\text{max}}$  = 2961, 2865, 1889, 1645, 1512, 1446, 1317, 1106, 988, 807, 718, 540  $\text{cm}^{-1}$ .

**GC-MS (EI):**  $m/z$  calculated for  $\text{C}_{18}\text{H}_{18}^+$   $[\text{M}]^+$ : 262.1; found: 262.1.

**1,4-Di-*m*-tolylbicyclo[2.1.1]hexane (2j)**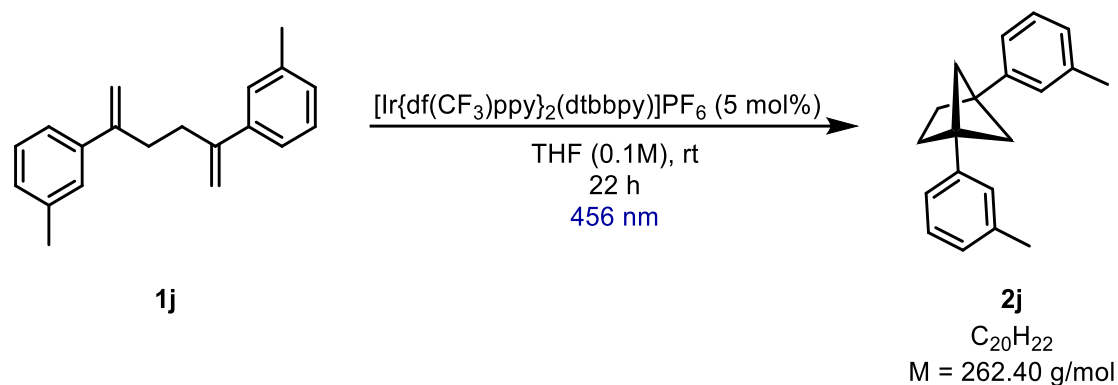

Prepared according to **GP1** using diene **1j** (49.9 mg, 0.190 mmol),  $[\text{Ir}\{\text{df}(\text{CF}_3)\text{ppy}\}_2(\text{dtbbpy})]\text{PF}_6$  (10.7 mg, 9.50  $\mu\text{mol}$ , 5 mol%), and THF (1.9 mL, 0.1 M). Purification by flash column chromatography ( $\text{SiO}_2$ , Pentane) afforded the title compound as a colourless oil (45.2 mg, 172  $\mu\text{mol}$ , 90%).

$R_f$  = 0.33 (Pentane).

$^1\text{H NMR}$  (300 MHz,  $\text{CDCl}_3$ ):  $\delta$  (ppm) 7.23–7.21 (m, 2H), 7.12–7.10 (m, 4H), 7.05–7.03 (m, 2H), 2.37 (s, 6H), 2.07 (s, 4H), 2.00–1.95 (m, 4H).

$^{13}\text{C}\{^1\text{H}\}$  NMR (101 MHz,  $\text{CDCl}_3$ ):  $\delta$  (ppm) 144.2 (2C), 137.9 (2C), 128.2 (2C), 126.9 (2C), 126.8 (2C), 123.1 (2C), 50.9 (2C), 47.7 (2C), 35.3 (2C), 21.6 (2C).

IR (ATR):  $\nu_{\text{max}}$  = 3020, 2952, 2919, 2866, 1607, 1488, 1322, 778, 698  $\text{cm}^{-1}$ .

GCMS (EI):  $m/z$  calculated for  $\text{C}_{20}\text{H}_{22}^+$   $[\text{M}]^+$ : 262.1; found: 262.0.

**1,4-Bis(4-methoxyphenyl)bicyclo[2.1.1]hexane (2I)**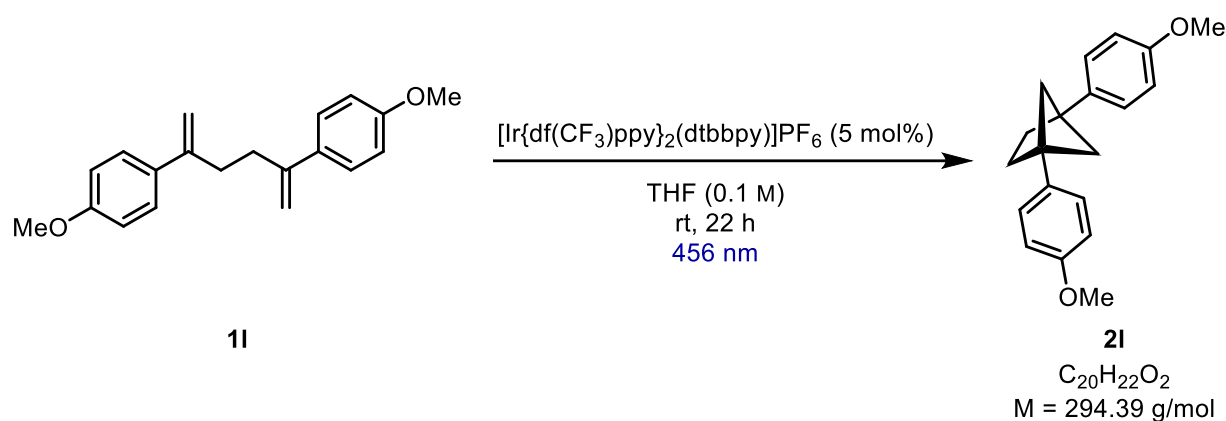

Prepared according to **GP1** using diene **1I** (58.9 mg, 0.200 mmol),  $[\text{Ir}\{\text{df}(\text{CF}_3)\text{ppy}\}_2(\text{dtbbpy})]\text{PF}_6$  (11.2 mg, 9.36  $\mu\text{mol}$ , 5 mol%), and THF (2 mL, 0.1 M). Purification by flash column chromatography ( $\text{SiO}_2$ , 19:1 Pentane: $\text{Et}_2\text{O}$ ) afforded the title compound as title compound as an inseparable mixture of diene **1I** and BCH **2I** (21 mg). A yield of 31% of BCH **2I** was determined by  $^1\text{H}$ -NMR spectroscopy relative to diene **1I**.

$R_f$  = 0.34 (19:1 Pentane: $\text{Et}_2\text{O}$ ).

$^1\text{H}$  NMR (300 MHz,  $\text{CDCl}_3$ ):  $\delta/\text{ppm}$  = 7.24–7.21 (m, 4H), 6.89–6.86 (m, 4H), 3.81 (s, 6H), 2.04 (s, 4H), 1.95–1.89 (m, 4H).

$^{13}\text{C}\{^1\text{H}\}$  NMR (101 MHz,  $\text{CDCl}_3$ ):  $\delta/\text{ppm}$  = 158.1 (2C), 136.5 (2C), 127.2 (4C), 113.8 (4C), 55.5 (2C), 55.4 (2C), 48.1 (2C), 35.1 (2C).

HRMS (ESI $^+$ ): calculated for  $\text{C}_{20}\text{H}_{22}\text{O}_3\text{Na}^+$   $[\text{M}+\text{Na}]^+$ : 333.1461; found: 333.1467.



**1,4-Di(pyridin-2-yl)bicyclo[2.1.1]hexane (2m)**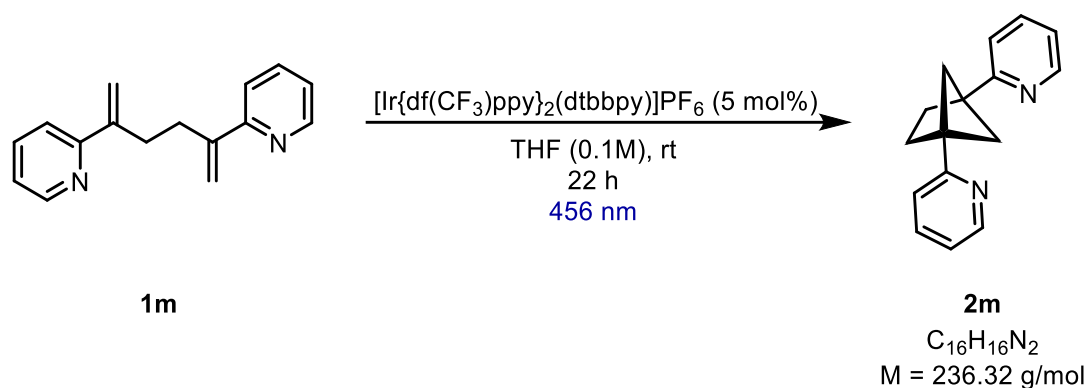

Prepared according to **GP1** using diene **1m** (44.9 mg, 0.190 mmol),  $[\text{Ir}\{\text{df}(\text{CF}_3)\text{ppy}\}_2(\text{dtbbpy})]\text{PF}_6$  (10.7 mg, 9.50  $\mu\text{mol}$ , 5 mol%), and THF (1.9 mL, 0.1 M). Purification by flash column chromatography ( $\text{SiO}_2$ , EtOAc) afforded the title compound as a yellow solid (43.1 mg, 182  $\mu\text{mol}$ , 95%).

$R_f = 0.22$  (EtOAc).

**M.P.** = 65–67 °C ( $\text{CH}_2\text{Cl}_2$ )

**$^1\text{H}$  NMR (300 MHz,  $\text{CDCl}_3$ ):**  $\delta$  (ppm) 8.60 (dd,  $J = 4.9, 0.9$  Hz, 2H), 7.68 (td,  $J = 7.7, 1.9$  Hz, 2H), 7.30 (d,  $J = 7.8$  Hz, 2H), 7.19–7.14 (m, 2H), 2.29–2.26 (m, 2H), 2.24 (s, 4H), 2.13 (dd,  $J = 4.0, 1.9$  Hz, 2H).

**$^{13}\text{C}\{^1\text{H}\}$  NMR (101 MHz,  $\text{CDCl}_3$ ):**  $\delta$  (ppm) 162.6 (2C), 149.1 (2C), 136.6 (2C), 121.5 (2C), 120.9 (2C), 52.5 (2C), 46.9 (2C), 33.7 (2C).

**IR (ATR):**  $\nu_{\text{max}} = 2979, 2954, 2868, 1601, 1583, 1561, 1472, 1430, 1327, 833, 777, 747, 551$   $\text{cm}^{-1}$ .

**GCMS (EI):**  $m/z$  calculated for  $\text{C}_{16}\text{H}_{16}\text{N}_2^+$   $[\text{M}]^+$ : 236.1; found: 236.0.

**1,4-Di(naphthalen-2-yl)bicyclo[2.1.1]hexane (2n)**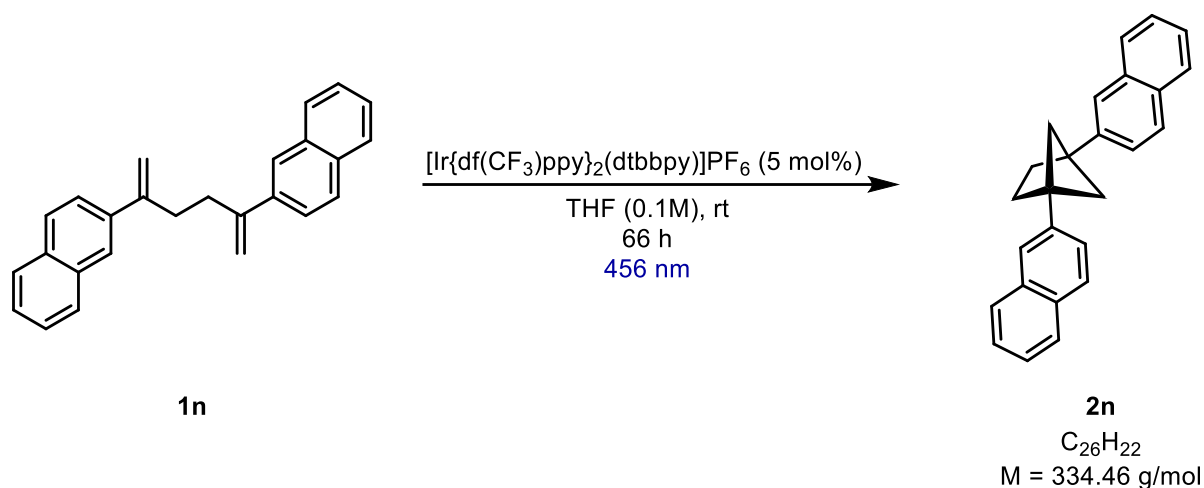

Prepared according to **GP1** using diene **1n** (63.6 mg, 0.190 mmol),  $[\text{Ir}\{\text{df}(\text{CF}_3)\text{ppy}\}_2(\text{dtbbpy})]\text{PF}_6$  (10.7 mg, 9.50  $\mu\text{mol}$ , 5 mol%), and THF (1.9 mL, 0.1 M). Purification by flash column chromatography ( $\text{SiO}_2$ , Pentane) afforded the title compound as a yellow solid (42.0 mg, 125  $\mu\text{mol}$ , 66%).

$R_f$  = 0.26 (Pentane)

**M.P.** = 120–122 °C ( $\text{CH}_2\text{Cl}_2$ )

$^1\text{H NMR}$  (300 MHz,  $\text{CDCl}_3$ ):  $\delta$  (ppm) 7.84–7.81 (m, 6H), 7.74 (s, 2H), 7.52–7.41 (m, 6H), 2.23–2.16 (m, 8H).

$^{13}\text{C}\{^1\text{H}\}$  NMR (101 MHz,  $\text{CDCl}_3$ ):  $\delta$  (ppm) 141.5 (2C), 133.4 (2C), 132.1 (2C), 127.8 (2C), 127.6 (2C), 127.6 (2C), 126.0 (2C), 125.3 (2C), 124.7 (2C), 124.1 (2C), 51.3 (2C), 47.7 (2C), 35.3 (2C).

**IR** (ATR):  $\nu_{\text{max}}$  = 3053, 2961, 2865, 1627, 1597, 1501, 1453, 1346, 1309, 891, 858, 813, 740  $\text{cm}^{-1}$ .

**GCMS** (EI):  $m/z$  calculated for  $\text{C}_{26}\text{H}_{22}^+$   $[\text{M}]^+$ : 334.1721; found: 334.1716.

**1-Phenyl-4-(4-(trifluoromethyl)phenyl)bicyclo[2.1.1]hexane (2o):**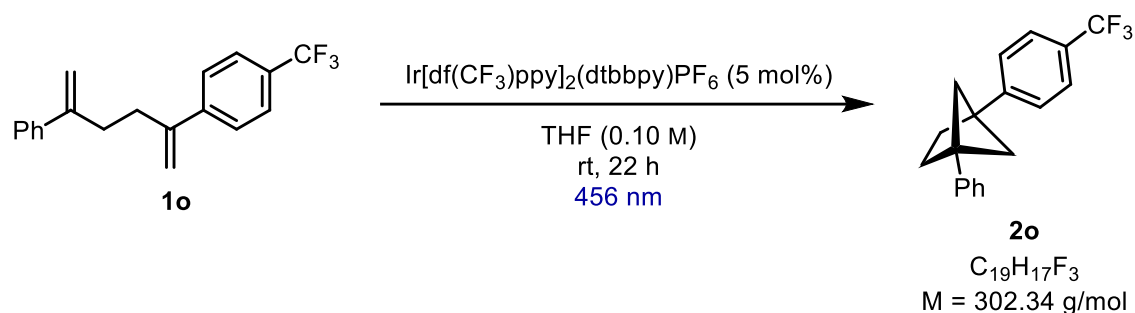

Prepared according to **GP1** using diene **1o** (60.7 mg, 0.201 mmol), [Ir{df(CF<sub>3</sub>)ppy}<sub>2</sub>(dtbbpy)]PF<sub>6</sub> (11.2 mg, 10.0 μmol, 5 mol%) and THF (2.0 mL, 0.1 M). Purification by flash column chromatography (SiO<sub>2</sub>, Pentane) afforded the title compound as a colourless oil (54.3 mg, 0.179 mmol, 89%).

*R*<sub>f</sub> = 0.35 (Pentane)

<sup>1</sup>H NMR (300 MHz, CDCl<sub>3</sub>): δ (ppm) 7.58 (d, *J* = 8.1 Hz, 2H), 7.41–7.28 (m, 6H), 7.24–7.21 (m, 1H), 2.11 (s, 4H), 2.02 (s, 4H).

<sup>13</sup>C{<sup>1</sup>H} NMR (75 MHz, CDCl<sub>3</sub>): 148.3 (1C), 143.7 (1C), 122.8 (1C), 128.4 (2C), 126.4 (2C), 126.1 (3C), 125.3 (q, *J* = 125.3 Hz, 2C), 122.7 (obtained from HMBC, 1C), 51.3 (1C), 50.9 (1C), 47.7 (2C), 35.4 (1C), 35.2 (1C).

<sup>19</sup>F{<sup>1</sup>H} NMR (282 MHz, CDCl<sub>3</sub>): δ (ppm): –62.31.

IR (ATR): *v*<sub>max</sub> = 2964, 2872, 1619, 1324, 1121, 837, 757, 698 cm<sup>-1</sup>.

GCMS (EI): *m/z* calculated for C<sub>19</sub>H<sub>17</sub>F<sub>3</sub><sup>+</sup> [M]<sup>+</sup>: 302.1277; found: 302.1275.

**Ethyl 1-phenylbicyclo[2.1.1]hexane-2-carboxylate (2p)**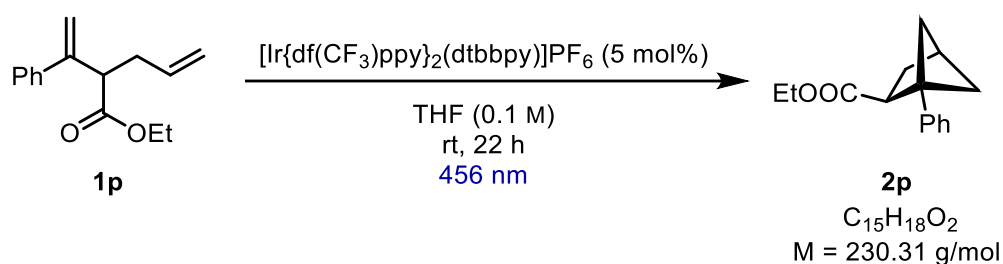

Prepared according to **GP1** using diene **1p** (46.1 mg, 0.200 mmol),  $[\text{Ir}\{\text{df}(\text{CF}_3)\text{ppy}\}_2(\text{dtbbpy})]\text{PF}_6$  (11.2 mg, 9.36  $\mu\text{mol}$ , 5 mol%), and THF (2 mL, 0.1 M). Purification by flash column chromatography ( $\text{SiO}_2$ , 19:1 Pentane:EtOAc) afforded the title compound as a colourless oil (28.5 mg, 0.124 mmol, 62%).

$R_f$  = 0.29 (19:1 Pentane:EtOAc).

$^1\text{H NMR}$  (300 MHz,  $\text{CDCl}_3$ ):  $\delta/\text{ppm}$  = 7.32–7.34 (m, 2H), 7.27–7.10 (m, 3H), 3.91 (qq,  $J$  = 7.09, 3.66 Hz, 2H), 2.99 (ddd,  $J$  = 7.99, 5.01, 1.45 Hz, 1H), 2.53 (tt,  $J$  = 2.90, 1.47 Hz, 1H), 2.19–2.10 (m, 3H), 1.82–1.77 (m, 2H), 1.65 (dd,  $J$  = 9.80, 6.66 Hz, 1H), 0.94 (t,  $J$  = 7.14 Hz, 3H).

$^{13}\text{C}\{^1\text{H}\}$  NMR (101 MHz,  $\text{CDCl}_3$ ):  $\delta/\text{ppm}$  = 175.3 (1C), 142.3 (1C), 128.1 (2C), 126.4 (1C), 126.0 (2C), 60.0 (1C), 58.6 (1C), 48.8 (1C), 46.6 (1C), 38.0 (1C), 35.3 (1C), 34.1 (1C), 14.1 (1C).

**IR** (ATR):  $\nu_{\text{max}}$  = 2976, 2961, 2874, 1727, 1447, 1373, 1348, 1288, 1266, 1234, 1181, 1149, 1120, 1114, 1097, 1082, 1054, 1041, 1023, 1012, 766, 698, 647, 544  $\text{cm}^{-1}$ .

**HRMS** (ESI): calculated for  $\text{C}_{15}\text{H}_{18}\text{O}_2\text{Na}^+$   $[\text{M}+\text{Na}]^+$ : 253.1199; found: 253.1210.

**1-Phenylbicyclo[2.1.1]hexan-2-ol (2q):**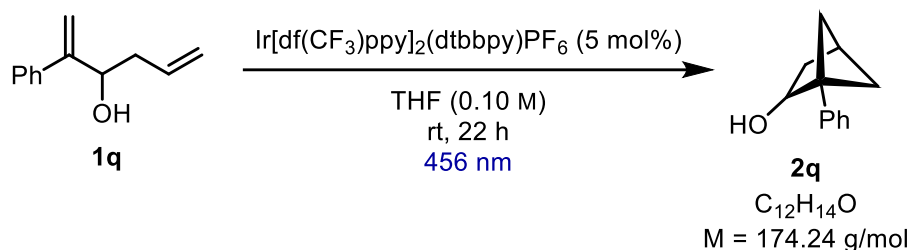

Prepared according to **GP1** using diene **1q** (34.9 mg, 0.200 mmol),  $[\text{Ir}\{\text{df}(\text{CF}_3)\text{ppy}\}_2(\text{dtbbpy})]\text{PF}_6$  (11.2 mg, 10.0  $\mu\text{mol}$ , 5 mol%) and THF (2.0 mL, 0.1 M). Purification by flash column chromatography ( $\text{SiO}_2$ , 80:20 Pentane:EtOAc) afforded the title compound as a colourless solid (34.4 mg, 0.197 mmol, 98%).

**M.P.** = 52–54 °C

**R<sub>f</sub>** = 0.32 (80:20Pentane:EtOAc)

**<sup>1</sup>H NMR (400 MHz, CDCl<sub>3</sub>):**  $\delta$  (ppm) 7.35–7.30 (m, 2H), 7.25–7.19 (m, 3H), 4.32 (d,  $J = 7.4$  Hz, 1H), 2.47 (tt,  $J = 3.0, 1.5$  Hz, 1H), 2.27 (dddd,  $J = 11.5, 7.3, 2.6, 1.5$  Hz, 1H), 1.99 (dd,  $J = 9.5, 6.7$  Hz, 1H), 1.85–1.76 (m, 2H), 1.61 (dd,  $J = 9.5, 6.9$  Hz, 1H), 1.59–1.54 (m, 2H).

**<sup>13</sup>C{<sup>1</sup>H} NMR (101 MHz, CDCl<sub>3</sub>):** 141.9 (1C), 128.5 (2C), 126.6 (1C), 126.3 (2C), 76.1 (1C), 59.3 (1C), 43.9 (1C), 39.4 (1C), 37.6 (1C), 35.1 (1C).

**IR (ATR):**  $\nu_{\text{max}} = 3274, 2972, 2357, 2330, 1092, 1040, 697$  cm<sup>-1</sup>.

**HRMS (ESI):**  $m/z$  calculated for  $\text{C}_{12}\text{H}_{14}\text{ONa}^+$   $[\text{M}+\text{Na}]^+$ : 197.0937; found: 197.0940.

**(S)-4-benzyl-3-((2S)-1-phenylbicyclo[2.1.1]hexane-2-carbonyl)oxazolidin-2-one (2r):**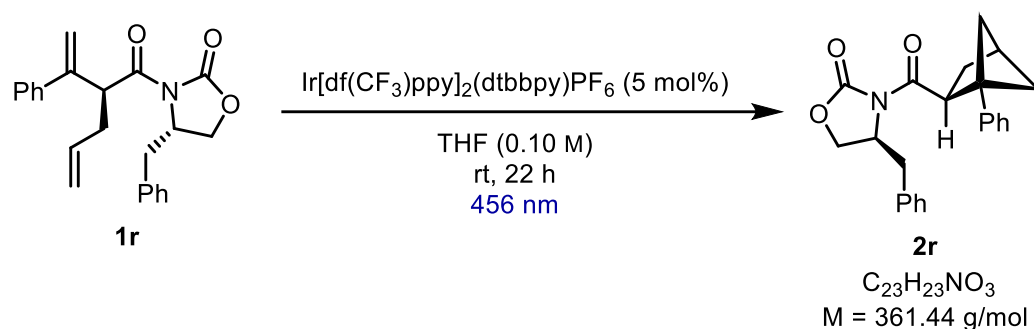

Prepared according to **GP1** using diene **1r** (72.3 mg, 0.200 mmol),  $[\text{Ir}\{\text{df}(\text{CF}_3)\text{ppy}\}_2(\text{dtbbpy})]\text{PF}_6$  (11.2 mg, 10.0  $\mu\text{mol}$ , 5 mol%) and THF (2.0 mL, 0.1 M). Purification by flash column chromatography ( $\text{SiO}_2$ , 90:10 Pentane:EtOAc) afforded the title compound as a colourless oil (55.6 mg, 0.153 mmol, 76%).

**M.P.** = 105 °C ( $\text{CH}_2\text{Cl}_2$ )

**R<sub>f</sub>** = 0.25 (90:10 Pentane:EtOAc)

**<sup>1</sup>H NMR (400 MHz,  $\text{CDCl}_3$ ):**  $\delta$  (ppm) 7.33–7.28 (m, 3H), 7.25–7.22 (m, 2H), 7.19–7.15 (m, 5H), 4.42 (ddd,  $J$  = 8.9, 4.4, 1.4 Hz, 1H), 4.35–4.29 (m, 1H), 3.90 (dd,  $J$  = 8.8, 1.9 Hz, 1H), 3.55 (t,  $J$  = 8.2 Hz, 1H), 3.25 (dd,  $J$  = 13.1, 3.4 Hz, 1H), 2.64 (dd,  $J$  = 13.4, 10.1 Hz, 1H), 2.59–2.58 (m, 1H), 2.31 (ddt,  $J$  = 11.2, 8.9, 2.1 Hz, 1H), 2.20 (dd,  $J$  = 9.5, 7.0 Hz, 1H), 2.17–2.12 (m, 1H), 1.86–1.78 (m, 3H).

**<sup>13</sup>C{<sup>1</sup>H} NMR (101 MHz,  $\text{CDCl}_3$ ):** 175.1 (1C), 155.3 (1C), 142.1 (1C), 135.7 (1C), 129.6 (2C), 129.0 (2C), 128.1 (2C), 127.4 (1C), 126.6 (1C), 126.1 (2C), 66.0 (1C), 59.3 (1C), 56.0 (1C), 46.9 (1C), 46.3 (1C), 38.6 (1C), 38.0 (1C), 35.5 (1C), 33.9 (1C).

**IR (ATR):**  $\nu_{\text{max}}$  = 2978, 1779, 1696, 1348, 1288, 1207, 1196, 1081, 761, 750, 732, 700  $\text{cm}^{-1}$ .

**HRMS (ESI):**  $m/z$  calculated for  $\text{C}_{23}\text{H}_{24}\text{NO}_3^+$   $[\text{M}+\text{H}]^+$ : 362.1751; found: 362.1751.

**$[\alpha]_{\text{D}}^{20}$ :** +136.8471° ( $c$  = 0.17 g/dL,  $\text{CH}_2\text{Cl}_2$ ).

**3-(4-Fluorophenyl)-1-phenylbicyclo[2.1.1]hexane (2s):**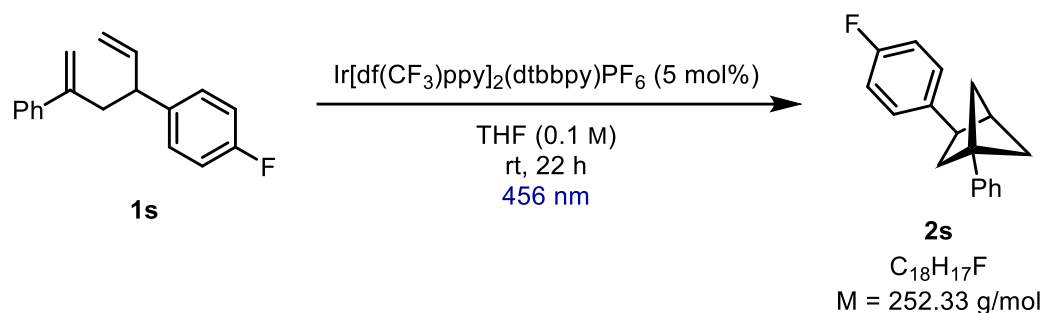

Prepared according to **GP1** using diene **1s** (50.5 mg, 0.200 mmol), [Ir{df(CF<sub>3</sub>)ppy}<sub>2</sub>(dtbbpy)]PF<sub>6</sub> (11.2 mg, 9.36 μmol, 5 mol%), and THF (2 mL, 0.10 M). Purification by flash column chromatography (SiO<sub>2</sub>, Pentane) afforded the title compound as a colourless oil (45.4 mg, 0.178 mmol, 88%).

*R<sub>f</sub>* = 0.24 (Pentane)

**<sup>1</sup>H NMR** (300 MHz, CDCl<sub>3</sub>): δ/ppm = 7.35–7.19 (m, 7H), 7.02 (t, *J* = 8.8 Hz, 2H), 3.52 (d, *J* = 14.4 Hz, 1H), 2.80 (d, *J* = 1.5 Hz, 1H), 2.47–2.39 (m, 1H), 2.02–1.96 (m, 2H), 1.80–1.75 (m, 1H), 1.72–1.65 (m, 2H)

**<sup>13</sup>C{<sup>1</sup>H} NMR** (101 MHz, CDCl<sub>3</sub>): δ/ppm = 161.2 (d, *J* = 243.4 Hz, 1C), 143.9 (1C), 141.0 (d, *J* = 3.2 Hz, 1C), 128.9 (d, *J* = 7.6 Hz, 2C), 128.3 (1C), 126.2 (2C), 125.9 (2C), 115.1 (d, *J* = 21.1 Hz, 2C), 54.4 (1C), 44.6 (1C), 44.5 (1C), 41.3 (1C), 40.8 (1C), 39.9 (1C).

**<sup>19</sup>F{<sup>1</sup>H} NMR (282 MHz, CDCl<sub>3</sub>):** δ (ppm): -118.04.

**IR** (ATR): ν<sub>max</sub> = 3057, 2968, 2947 2870, 1604, 1508, 1221, 830, 562 cm<sup>-1</sup>.

**GC-MS** (EI): calculated for C<sub>18</sub>H<sub>17</sub>F<sup>+</sup> [M]<sup>+</sup>:252.1309; found:252.1310.

**3-(4-Phenylbicyclo[2.1.1]hexan-2-yl)pyridine (2t):**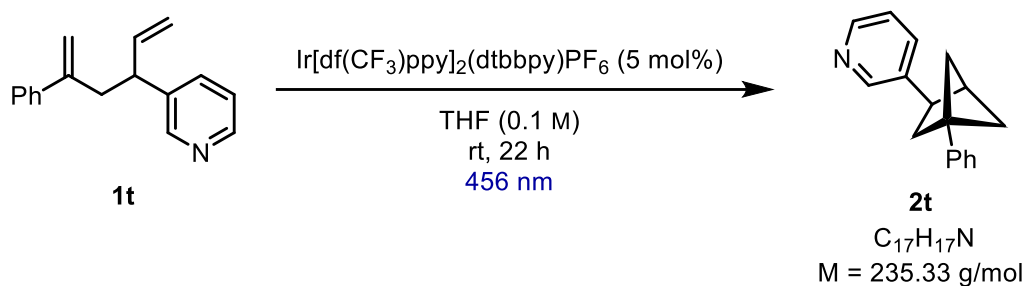

Prepared according to **GP1** using diene **1t** (47.1 mg, 0.200 mmol),  $[\text{Ir}\{\text{df}(\text{CF}_3)\text{ppy}\}_2(\text{dtbbpy})]\text{PF}_6$  (11.2 mg, 9.36  $\mu\text{mol}$ , 5 mol%), and THF (2 mL, 0.10 M). Purification by flash column chromatography ( $\text{SiO}_2$ , Pentane:EtOAc 7:3) afforded the title compound as yellow oil (42.9 mg, 0.182 mmol, 91%).

$R_f = 0.21$  (Pentane:EtOAc 7:3)

$^1\text{H NMR}$  (300 MHz,  $\text{CDCl}_3$ ):  $\delta/\text{ppm} = 8.59$  (s, 1H), 8.45 (d,  $J = 3.9 \text{ Hz}$ , 1H), 7.60 (d,  $J = 7.9 \text{ Hz}$ , 1H), 7.34–7.27 (m, 2H), 7.25–7.18 (m, 4H), 3.57–3.53 (m, 1H), 2.87–2.85 (m, 1H), 2.49–2.43 (m, 1H), 2.06–1.99 (m, 2H), 1.83–1.78 (m, 1H), 1.73–1.64 (m, 2H).

$^{13}\text{C}\{^1\text{H}\}$  NMR (101 MHz,  $\text{CDCl}_3$ ):  $\delta/\text{ppm} = 149.6$  (1C), 147.2 (1C), 143.5 (1C), 140.5 (1C), 135.1 (1C), 128.4 (2C), 126.4 (1C), 125.9 (2C), 123.3 (1C), 54.6 (1C), 44.5 (1C), 43.1 (1C), 40.7 (1C), 40.5 (1C), 39.9 (1C).

**IR** (ATR):  $\nu_{\text{max}} = 3024, 2967, 2870, 1477, 1417, 1022, 755, 714, 697, 545 \text{ cm}^{-1}$ .

**HRMS** (ESI): calculated for  $\text{C}_{17}\text{H}_{18}\text{N}^+$   $[\text{M}+\text{H}]^+$ : 236.1434; found: 236.1439.



**Ethyl 1-phenylbicyclo[2.1.1]hexane-5-carboxylate (2u)**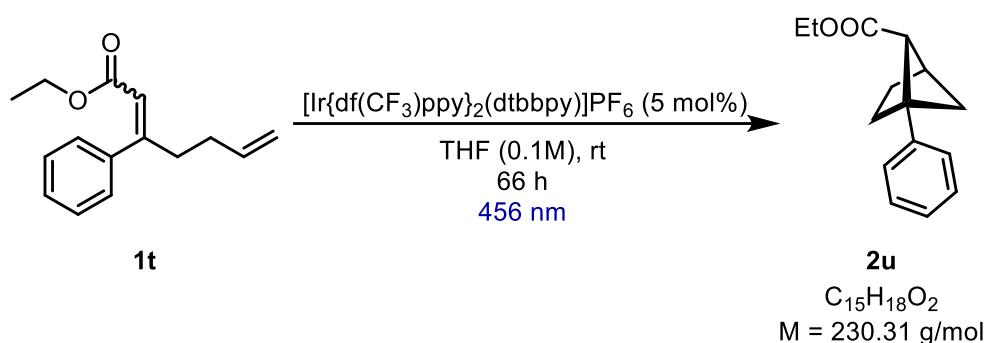

Prepared according to **GP1** using diene **1u** (43.7 mg, 190  $\mu\text{mol}$ ),  $[\text{Ir}\{\text{df}(\text{CF}_3)\text{ppy}\}_2(\text{dtbbpy})]\text{PF}_6$  (10.7 mg, 9.50  $\mu\text{mol}$ , 5 mol%), and THF (1.9 mL, 0.1 M). Purification by flash column chromatography ( $\text{SiO}_2$ , 80:20 Pentane:EtOAc) afforded the title compound as a 10:1 (endo:exo) mixture of diastereomers and a colourless oil (42.0 mg, 182  $\mu\text{mol}$ , 95%).

Data is consistent with that previously reported.<sup>20</sup>

**Major (endo) diastereomer:**

$R_f$  = 1.00 (80:20 Pentane:EtOAc)

$^1\text{H NMR}$  (300 MHz,  $\text{CDCl}_3$ ):  $\delta$  (ppm) 7.39 (d,  $J$  = 7.1 Hz, 2H), 7.31 (t,  $J$  = 7.6 Hz, 2H), 7.21 (t,  $J$  = 7.2 Hz, 1H), 4.17–4.06 (m, 2H), 2.79 (s, 1H), 2.64 (m, 1H), 2.25–2.19 (m, 1H), 1.98–1.92 (m, 1H), 1.86–1.76 (m, 2H), 1.73–1.70 (m, 1H), 1.36 (d,  $J$  = 6.5 Hz, 1H), 1.23 (t,  $J$  = 7.1 Hz, 3H).

$^{13}\text{C}\{^1\text{H}\}$  NMR (101 MHz,  $\text{CDCl}_3$ ):  $\delta$  (ppm) 171.2 (1C), 142.2 (1C), 128.2 (2C), 126.8 (2C), 126.5 (1C), 59.9 (1C), 57.3 (1C), 53.1 (1C), 41.8 (1C), 39.9 (1C), 30.1 (1C), 26.7 (1C), 14.4 (1C).

IR (ATR):  $\nu_{\text{max}}$  = 2976, 2880, 1723, 1446, 1372, 1213, 1194, 1054, 755, 696  $\text{cm}^{-1}$ .

GCMS (EI):  $m/z$  calculated for  $\text{C}_{15}\text{H}_{18}\text{O}_2\text{Na}^+$   $[\text{M}+\text{Na}]^+$  : 253.1199; found: 253.1199.

**Ethyl 4-methyl-1-phenylbicyclo[2.1.1]hexane-2-carboxylate (2v)**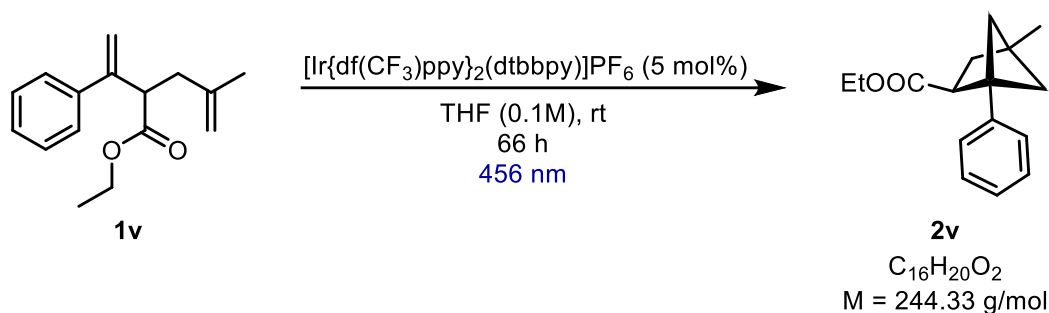

Prepared according to **GP1** using diene **1v** (46.4 mg, 190  $\mu\text{mol}$ ),  $[\text{Ir}\{\text{df}(\text{CF}_3)\text{ppy}\}_2(\text{dtbbpy})]\text{PF}_6$  (10.7 mg, 9.50  $\mu\text{mol}$ , 5 mol%), and THF (1.9 mL, 0.1 M). Purification by flash column chromatography ( $\text{SiO}_2$ , 99:1 Pentane:EtOAc) afforded the title compound as a colourless oil (33.7 mg, 137  $\mu\text{mol}$ , 72%).

$R_f$  = 0.21 (99:1 Pentane:EtOAc)

$^1\text{H NMR}$  (300 MHz,  $\text{CDCl}_3$ ):  $\delta$  (ppm) 7.28–7.13 (m, 5H), 3.95–3.84 (m, 2H), 3.08–3.03 (m, 1H), 2.29–2.23 (m, 1H), 2.01–1.89 (m, 2H), 1.77–1.71 (m, 1H), 1.59–1.53 (m, 3H), 1.26 (m, 2H), 0.93 (t,  $J$  = 7.1 Hz, 3H).

$^{13}\text{C}\{^1\text{H}\}$  NMR (101 MHz,  $\text{CDCl}_3$ ):  $\delta$  (ppm) 174.9 (1C), 142.1 (1C), 127.9 (2C), 126.2 (1C), 125.9 (2C), 59.8 (1C), 55.4 (1C), 51.0 (1C), 50.9 (1C), 43.4 (1C), 42.4 (1C), 39.4 (1C), 19.0 (1C), 13.9 (1C).

IR (ATR):  $\nu_{\text{max}}$  = 2946, 2865, 1723, 1442, 1372, 1309, 1180, 1146, 1051, 766, 696  $\text{cm}^{-1}$ .

GCMS (ESI):  $m/z$  calculated for  $\text{C}_{16}\text{H}_{20}\text{O}_2\text{Na}^+$   $[\text{M}+\text{Na}]^+$ : 267.1361; found: 267.1356.

**Methyl-3-hydroxy-4-phenylbicyclo[2.1.1]hexane-1-carboxylate (2w):**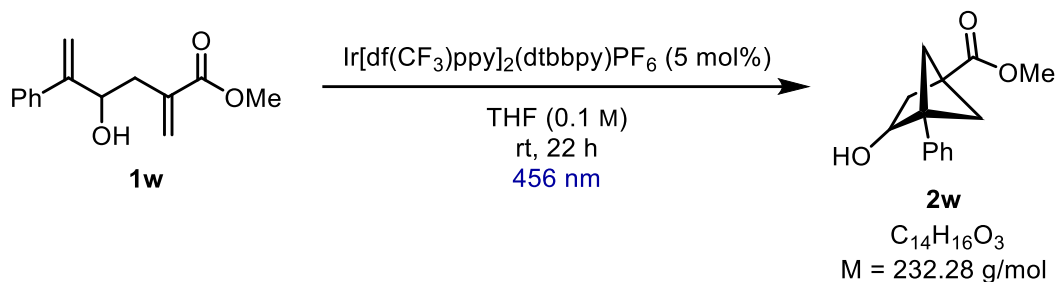

Prepared according to **GP1** using diene **1w** (46.5 mg, 0.200 mmol),  $[\text{Ir}\{\text{df}(\text{CF}_3)\text{ppy}\}_2(\text{dtbbpy})]\text{PF}_6$  (11.2 mg, 9.36  $\mu\text{mol}$ , 5 mol%), and THF (2 mL, 0.10 M). Purification by flash column chromatography ( $\text{SiO}_2$ , Pentane:EtOAc 4:1) afforded the title compound as colourless solid (28.7 mg, 0.124 mmol, 61%).

$R_f$  = 0.60 (Pentane:EtOAc 4:1)

**M.P.** = 140 – 141 °C

**$^1\text{H}$  NMR** (300 MHz,  $\text{CDCl}_3$ ):  $\delta/\text{ppm}$  = 7.37–7.28 (m, 3H), 7.24–7.18 (m, 2H), 4.38 (dt,  $J$  = 7.5, 2.0 Hz, 1H), 3.72 (s, 3H), 2.50 (ddd,  $J$  = 11.6, 7.4, 2.7 Hz, 1H), 2.38 (dd,  $J$  = 9.2, 6.6 Hz, 1H), 2.13–2.09 (m, 2H), 1.94 (dd,  $J$  = 9.2, 6.9 Hz, 1H), 1.87 (ddd,  $J$  = 11.6, 3.8, 2.3 Hz, 1H).

**$^{13}\text{C}\{^1\text{H}\}$  NMR** (101 MHz,  $\text{CDCl}_3$ ):  $\delta/\text{ppm}$  = 172.9 (1C), 140.1 (1C), 128.6 (2C), 127.0 (1C), 126.2 (2C), 75.8 (1C), 56.0 (1C), 51.7 (1C), 47.5 (1C), 45.8 (1C), 40.9 (1C), 40.3 (1C).

**IR** (ATR):  $\nu_{\text{max}}$  = 3463, 2952, 1732, 1438, 1260, 1094, 1040, 758, 700  $\text{cm}^{-1}$ .

**HRMS** (ESI): calculated for  $\text{C}_{14}\text{H}_{16}\text{O}_3\text{Na}^+$   $[\text{M}+\text{Na}]^+$ : 255.0992; found: 255.0997.

**3-(1-methyl-4-phenylbicyclo[2.1.1]hexan-2-yl)pyridine (2x):**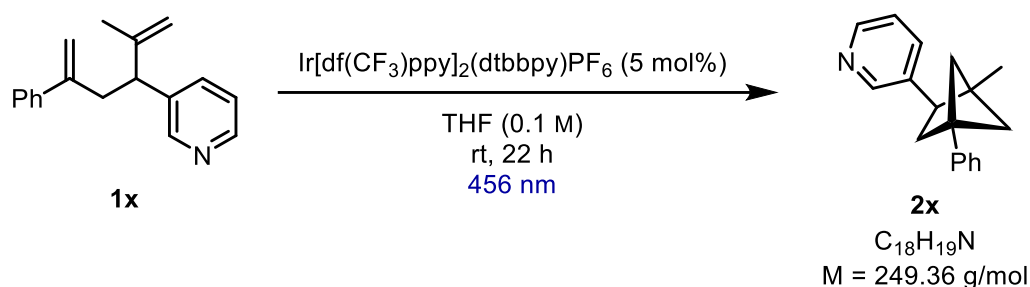

Prepared according to **GP1** using diene **1x** (49.9 mg, 0.200 mmol),  $[\text{Ir}\{\text{df}(\text{CF}_3)\text{ppy}\}_2(\text{dtbbpy})]\text{PF}_6$  (11.2 mg, 9.36  $\mu\text{mol}$ , 5 mol%), and THF (2 mL, 0.10 M). Purification by flash column chromatography ( $\text{SiO}_2$ ,  $\text{CH}_2\text{Cl}_2$ :EtOAc 9:1) afforded the title compound as pale yellow oil (44.2 mg, 0.177 mmol, 88%).

$R_f = 0.15$  ( $\text{CH}_2\text{Cl}_2$ :EtOAc 9:1)

$^1\text{H NMR}$  (300 MHz,  $\text{CDCl}_3$ ):  $\delta/\text{ppm} = 8.61$  (d,  $J = 2.4$  Hz, 1H), 8.49 (dd,  $J = 4.9, 1.8$  Hz, 1H), 7.67 (dt,  $J = 8.0, 2.1$  Hz, 1H), 7.38–7.20 (m, 6H), 3.23 (dd,  $J = 9.3, 1.8$  Hz, 1H), 2.45 (ddd,  $J = 11.4, 4.5, 2.7$  Hz, 1H), 2.25 (ddd,  $J = 11.4, 4.5, 2.7$  Hz, 1H), 2.10–2.04 (m, 1H), 1.87–1.79 (m, 2H), 1.53 (dt,  $J = 7.3, 2.1$  Hz, 1H), 1.08 (s, 3H).

$^{13}\text{C}\{^1\text{H}\}$  NMR (101 MHz,  $\text{CDCl}_3$ ):  $\delta/\text{ppm} = 150.5$  (1C), 147.6 (1C), 143.6 (1C), 138.5 (1C), 135.6 (1C), 128.4 (2C), 126.3 (1C), 126.1 (2C), 123.2 (1C), 51.4 (1C), 50.3 (1C), 49.7 (1C), 48.4 (1C), 43.0 (1C), 41.8 (1C), 18.1 (1C).

IR (ATR):  $\nu_{\text{max}} = 3084, 2949, 2869, 2360, 2331, 1573, 1573, 1422, 1025, 757, 699, 546 \text{ cm}^{-1}$ .

HRMS (ESI): calculated for  $\text{C}_{18}\text{H}_{20}\text{N}^+$   $[\text{M}+\text{H}]^+$ : 250.1590; found: 250.1590.

**1-Phenylspiro[bicyclo[2.1.1]hexane-2,1'-cyclopentane] (2y)**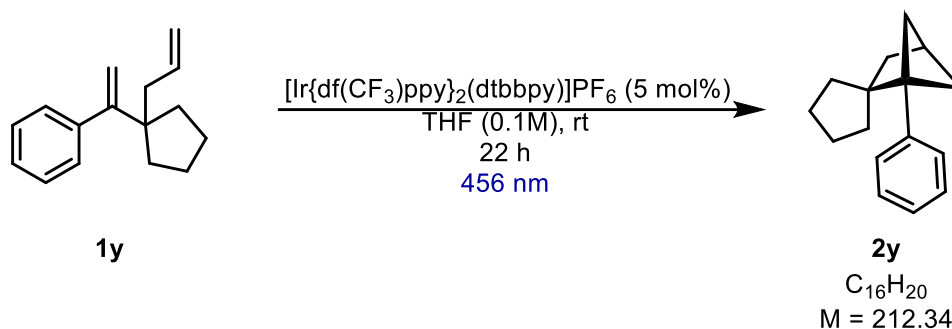

Prepared according to **GP1** using diene **1y** (40.3 mg, 0.190 mmol), [Ir{df(CF<sub>3</sub>)ppy}<sub>2</sub>(dtbbpy)]PF<sub>6</sub> (10.7 mg, 9.50 μmol, 5 mol%), and THF (1.9 mL, 0.1 M). Purification by flash column chromatography (SiO<sub>2</sub>, Pentane) afforded the title compound as a colourless oil (39.0 mg, 183 μmol, 96%).

**R<sub>f</sub>** = 0.97 (Pentane)

**M.P.** = 31–33 °C (CH<sub>2</sub>Cl<sub>2</sub>)

**<sup>1</sup>H NMR (300 MHz, CDCl<sub>3</sub>):** δ (ppm) 7.30–7.25 (m, 2H), 7.20–7.16 (m, 1H), 7.12–7.09 (m, 2H), 2.48 (s, 1H), 1.89 (dd, *J* = 4.2, 2.1 Hz, 2H), 1.78–1.73 (m, 4H), 1.55–1.45 (m, 6H), 1.32–1.26 (m, 2H).

**<sup>13</sup>C{<sup>1</sup>H} NMR (101 MHz, CDCl<sub>3</sub>):** δ (ppm) <sup>13</sup>C NMR (101 MHz, CDCl<sub>3</sub>) δ 143.4 (1C), 127.5 (2C), 127.3 (2C), 125.6 (1C), 59.8 (1C), 51.9 (1C), 46.4 (1C), 42.8 (2C), 35.2 (2C), 35.2 (1C), 24.4 (2C).

**IR (ATR):**  $\nu_{\max}$  = 3023, 2950, 2861, 1601, 1497, 1442, 1287, 1202, 769, 700 cm<sup>-1</sup>.

**GCMS (EI):** *m/z* calculated for C<sub>16</sub>H<sub>20</sub><sup>+</sup> [M]<sup>+</sup>: 212.1565; found: 212.1558.

5-Ethyl 1-methyl-4-phenylbicyclo[2.1.1]hexane-1,5-dicarboxylate (**2z**)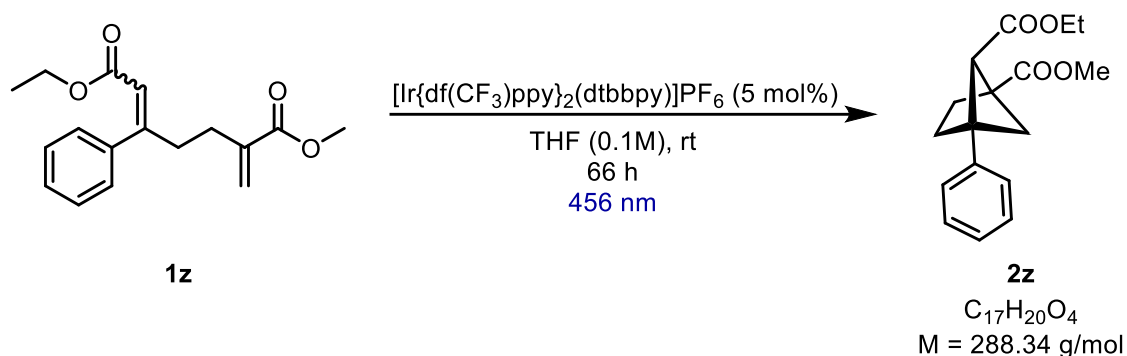

Prepared according to **GP1** using diene **1z** (55.0 mg, 0.190 mmol), [Ir{df(CF<sub>3</sub>)ppy}<sub>2</sub>(dtbbpy)]PF<sub>6</sub> (10.7 mg, 9.50 μmol, 5 mol%), and THF (1.9 mL, 0.1 M). Purification by flash column chromatography (SiO<sub>2</sub>, 95:5 Pentane:EtOAc) afforded the title compound as a colourless oil and an inseparable 2:1 (*exo:endo*) mixture of stereoisomers (35.1 mg, 121 μmol, 64%).

*R<sub>f</sub>* = 0.20 (95:5 Pentane:EtOAc)

<sup>13</sup>C{<sup>1</sup>H} NMR (101 MHz, CDCl<sub>3</sub>): 174.0, 173.0, 172.1, 169.6, 140.7, 140.5, 128.4, 128.2, 127.0, 126.9, 126.7, 125.9, 60.3, 60.3, 55.3, 55.2, 55.0, 52.2, 51.9, 51.8, 49.4, 48.8, 47.9, 45.7, 40.9, 35.4, 31.0, 28.1, 14.3, 14.0.

IR (ATR):  $\nu_{\max}$  = 2987, 2954, 1726, 1434, 1346, 1257, 1180, 1098, 700 cm<sup>-1</sup>.

GC-MS (ESI): *m/z* calculated for C<sub>17</sub>H<sub>20</sub>O<sub>4</sub>Na<sup>+</sup> [M+Na]<sup>+</sup>: 311.1259; found: 311.1254.

**exo-2z**

<sup>1</sup>H NMR (300 MHz, CDCl<sub>3</sub>): δ (ppm) 7.38–7.13 (m, 5H), 3.92 (dq, *J* = 7.0, 2.9 Hz, 2H), 3.72 (s, 3H), 3.15–3.20 (m, 1H), 2.56 (dd, *J* = 9.5, 6.9 Hz, 1H), 2.38–2.26 (m, 2H), 2.21–1.93 (m, 3H), 0.94 (t, *J* = 7.2 Hz, 3H).

**endo-2z**

<sup>1</sup>H NMR (300 MHz, CDCl<sub>3</sub>): δ (ppm) 7.38–7.13 (m, 5H), 4.13 (q, *J* = 7.1 Hz, 2H), 3.75 (s, 3H), 2.99 (s, 1H), 2.38–2.26 (m, 2H), 2.21–1.93 (m, 3H), 1.75 (d, *J* = 6.2 Hz, 1H), 1.21 (t, *J* = 7.2 Hz, 3H).

Methyl-3-hydroxy-5-methyl-4-phenylbicyclo[2.1.1]hexane-1-carboxylate (**2aa**)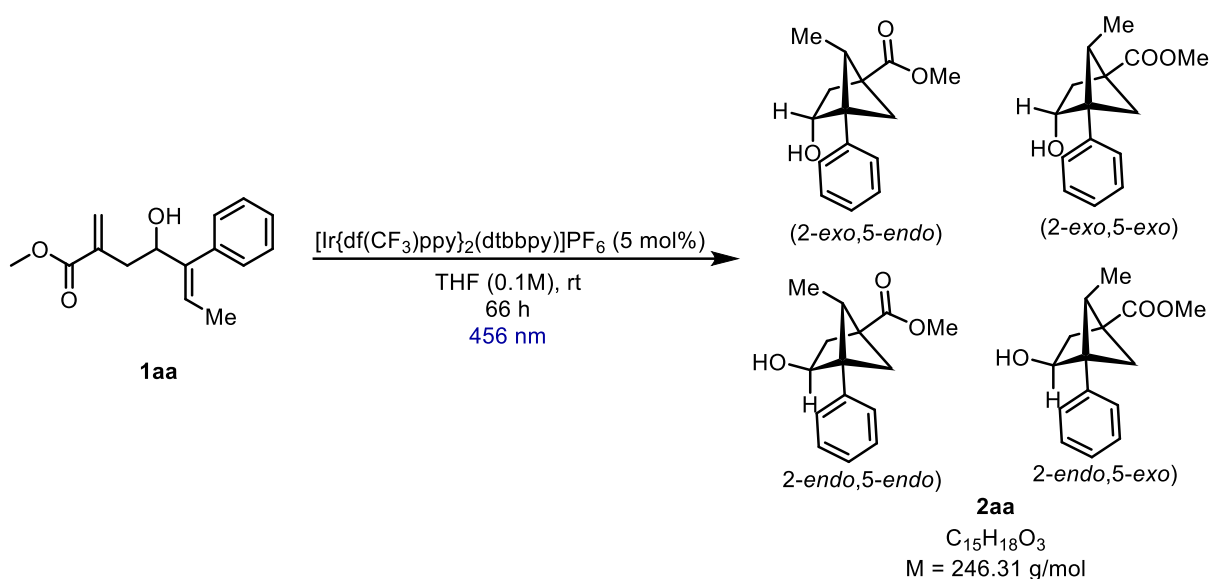

Prepared according to **GP1** using diene **1aa** (46.8 mg, 190  $\mu$ mol), [Ir{df(CF<sub>3</sub>)ppy}<sub>2</sub>(dtbbpy)]PF<sub>6</sub> (10.7 mg, 9.50  $\mu$ mol, 5 mol%), and THF (1.9 mL, 0.1 M). Purification by flash column chromatography (SiO<sub>2</sub>, 80:20 Pentane:EtOAc) afforded the title compound as a colourless oil and an inseparable 1.7:1.7:1.4:1.0 (2-endo,5-endo : 2-endo,5-exo : 2-exo,5-exo : 2-exo,5-endo) mixture of stereoisomers (42.2 mg, 171  $\mu$ mol, 90%).

The diastereomers could be separated by preparative HPLC (PVA-Sil, Hexane-IPA 99.5:0.5, isocratic; 1.0 mL/min, 295 K)

$R_f$  = 0.46 (80:20 Pentane:EtOAc)

**GCMS** (ESI):  $m/z$  calculated for C<sub>15</sub>H<sub>18</sub>O<sub>3</sub>Na<sup>+</sup> [M+Na]<sup>+</sup>: 269.1154; found: 269.1148.

**(2-*exo*,5-*exo*):**

**<sup>1</sup>H NMR (300 MHz, CDCl<sub>3</sub>):**  $\delta$  (ppm) 7.38–7.33 (m, 2H), 7.28–7.22 (m, 1H), 7.11–7.08 (m, 2H), 4.38–4.35 (m, 1H), 3.71 (s, 3H), 2.54–2.48 (m, 2H), 2.33–2.26 (m, 2H), 1.83 (dd,  $J$  = 11.4, 2.3 Hz, 1H), 1.59 (d,  $J$  = 2.9 Hz, 1H), 0.97 (d,  $J$  = 6.5 Hz, 3H).

**<sup>13</sup>C{<sup>1</sup>H} NMR (101 MHz, CDCl<sub>3</sub>):**  $\delta$  (ppm) 172.6 (1C), 138.1 (1C), 128.7 (2C), 127.1 (2C), 127.0 (1C), 76.3 (1C), 58.8 (1C), 52.1 (1C), 51.6 (1C), 50.3 (1C), 42.1 (1C), 34.7 (1C), 9.5 (1C).

**IR** (ATR):  $\nu_{\max}$  = 3486, 2950, 2916, 1726, 1434, 1339, 1257, 1079, 700 cm<sup>-1</sup>.

**(2-*exo*,5-*endo*):**

**<sup>1</sup>H NMR (300 MHz, CDCl<sub>3</sub>):**  $\delta$  (ppm) 7.37–7.34 (m, 2H), 7.28–7.23 (m, 3H), 4.51 (d,  $J$  = 8.0 Hz, 1H), 2.54 (ddd,  $J$  = 12.0, 7.1, 2.8 Hz, 1H), 2.35 (dq,  $J$  = 6.8, 2.2 Hz, 1H), 2.27 (d,  $J$  = 6.7 Hz, 1H), 1.98–1.94 (m, 1H), 1.87 (dt,  $J$  = 12.0, 2.2 Hz, 2H), 1.47 (d,  $J$  = 3.3 Hz, 1H), 1.04 (d,  $J$  = 6.7 Hz, 4H).

**<sup>13</sup>C{<sup>1</sup>H} NMR (101 MHz, CDCl<sub>3</sub>):**  $\delta$  (ppm) 172.9 (1C), 139.7 (1C), 128.7 (2C), 127.1 (1C), 126.8 (2C), 73.9 (1C), 57.9 (1C), 52.9 (1C), 51.7 (1C), 50.1 (1C), 39.7 (1C), 37.6 (1C), 9.5 (1C).

**IR** (ATR):  $\nu_{\max}$  = 3452, 2950, 1726, 1434, 1349, 1257, 1228, 700 cm<sup>-1</sup>.

**(2-endo,5-exo):**

**<sup>1</sup>H NMR (300 MHz, CDCl<sub>3</sub>):** δ (ppm) 7.38–7.32 (m, 2H), 7.29–7.24 (m, 1H), 7.11–7.08 (m, 2H), 4.20 (dt, *J* = 7.7, 2.8 Hz, 1H), 2.85 (quint., *J* = 6.9 Hz, 1H), 2.59–2.42 (m, 2H), 1.94–1.82 (m, 2H), 1.75 (d, *J* = 3.2 Hz, 1H), 1.75 (d, *J* = 3.2 Hz, 3H).

**<sup>13</sup>C{<sup>1</sup>H} NMR (101 MHz, CDCl<sub>3</sub>):** δ (ppm) 172.8 (1C), 138.9 (1C), 128.5 (2C), 126.9 (2C), 126.8 (1C), 76.4 (1C), 57.7 (1C), 51.6 (1C), 49.7 (1C), 46.9 (1C), 41.8 (1C), 39.5 (1C), 9.3 (1C).

**IR (ATR):**  $\nu_{\max}$  = 3445, 2950, 2355, 1726, 1434, 1257, 1091, 700 cm<sup>-1</sup>.

**(2-endo,5-endo):**

**<sup>1</sup>H NMR (300 MHz, CDCl<sub>3</sub>):** δ (ppm) 7.38–7.33 (m, 2H), 7.29–7.24 (m, 3H), 4.41–4.35 (m, 1H), 3.71 (s, 3H), 2.55–2.46 (m, 2H), 2.13 (dt, *J* = 12.1, 3.3 Hz, 1H), 1.86–1.82 (m, 1H), 1.77–1.72 (m, 2H), 1.37 (d, *J* = 6.7 Hz, 3H).

**<sup>13</sup>C{<sup>1</sup>H} NMR (101 MHz, CDCl<sub>3</sub>):** δ (ppm) 172.8 (1C), 140.3 (1C), 128.7 (2C), 127.0 (1C), 126.7 (2C), 76.6 (1C), 58.2 (1C), 51.7 (1C), 51.2 (1C), 49.1 (1C), 45.5 (1C), 37.2 (1C), 11.8 (1C).

**IR (ATR):**  $\nu_{\max}$  = 3438, 2950, 2359, 2337, 1726, 1434, 1257, 1087, 700 cm<sup>-1</sup>.



**2,2,3,3-tetrafluoro-1,4-diphenylbicyclo[2.1.1]hexane (2ab):**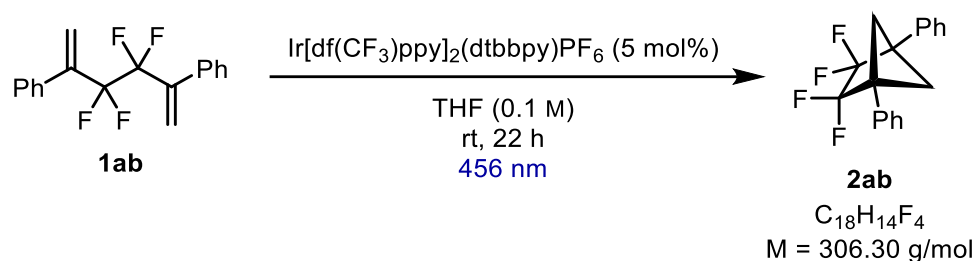

Prepared according to **GP1** using diene **1ab** (61.3 mg, 0.200 mmol),  $[\text{Ir}\{\text{df}(\text{CF}_3)\text{ppy}\}_2(\text{dtbbpy})]\text{PF}_6$  (11.2 mg, 9.36  $\mu\text{mol}$ , 5 mol%), and THF (2 mL, 0.10 M). Purification by flash column chromatography ( $\text{SiO}_2$ , 95:5 Pentane:EtOAc) afforded the title compound as a colourless crystals (54.1 mg, 0.177 mmol, 88%).

$R_f = 0.54$  (95:5 Pentane:EtOAc).

**M.P.** = 162 °C ( $\text{CH}_2\text{Cl}_2$ )

$^1\text{H NMR}$  (300 MHz,  $\text{CDCl}_3$ ):  $\delta/\text{ppm} = 7.44\text{--}7.36$  (m, 5H), 7.34–7.28 (m, 5H), 2.73 (dd,  $J = 2.4$  Hz, 2H), 2.41–2.28 (m, 2H)

$^{13}\text{C}\{^1\text{H}\}$  NMR (101 MHz,  $\text{CDCl}_3$ ):  $\delta/\text{ppm} = 148.6$  (2C), 133.7 (2C), 128.7 (4C), 128.4 (2C), 127.3 (4C), 53.3 (2C), 39.6 (2C)

$^{19}\text{F}\{^1\text{H}\}$  NMR (282 MHz,  $\text{CDCl}_3$ ):  $\delta$  (ppm): -123.05.

**IR** (ATR):  $\nu_{\text{max}} = 3031, 2962, 2932, 1779, 1448, 1331, 1287, 1140, 1066, 904, 767, 696, 573 \text{ cm}^{-1}$ .

**GC-MS** (EI): calculated for  $\text{C}_{18}\text{H}_{14}\text{F}_4^+$   $[\text{M}]^+$ : 306.1026; found: 306.1026.

**6.4 Synthesis of BCH 3, 4, 6, 8-10:****3-Hydroxy-N,N-dimethyl-4-phenylbicyclo[2.1.1]hexane-1-carboxamide (3):**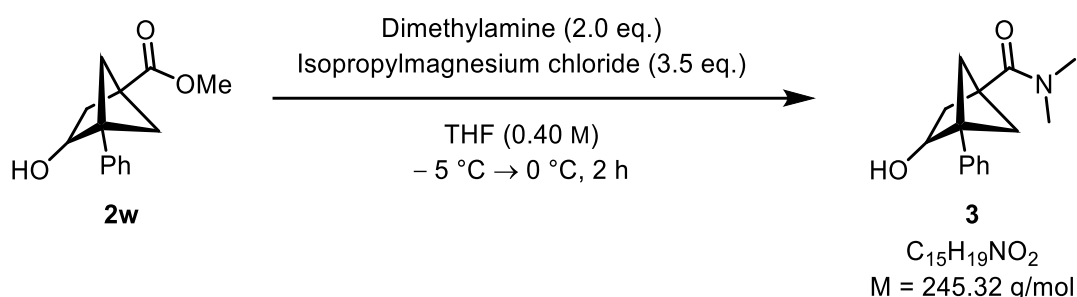

A solution of BCH **2w** (20.0 mg, 86.1  $\mu$ mol, 1.00 eq.) in THF (0.86, 0.40 M) was cooled to – 5 °C and dimethylamine (2.0 M in THF, 0.09 mL, 0.2 mmol, 2 eq.) was added. After dropwise addition of isopropylmagnesium chloride (2.0 M in THF, 0.15 mL, 3.5 eq.) over one minute, the reaction was allowed to warm to room temperature over 2 h.

The reaction was neutralised by addition of NH<sub>4</sub>Cl (sat., aq., 1 mL) and the solution was further diluted with H<sub>2</sub>O (1 mL) and CH<sub>2</sub>Cl<sub>2</sub> (2 mL). The aqueous phase was extracted with CH<sub>2</sub>Cl<sub>2</sub> (4  $\times$  3 mL). The combined organic phases were washed with brine (1 mL), dried over anhydrous Na<sub>2</sub>SO<sub>4</sub>, filtered and the solvent was removed under reduced pressure. The title compound was obtained as colourless solid (20.2 mg, 82.3  $\mu$ mol, 95%) and was used without further purification.

**M.P.** = 140 – 141 °C

**<sup>1</sup>H NMR (300 MHz, CDCl<sub>3</sub>):**  $\delta$  (ppm): 7.38–7.28 (m, 3H), 7.24–7.19 (m, 2H), 4.40 (dt,  $J$  = 7.4, 2.0 Hz, 1H), 3.04 (s, 3H), 2.96 (s, 3H), 2.52–2.44 (m, 2H), 2.11–2.04 (m, 3H), 1.86 (dt,  $J$  = 10.6, 2.7 Hz, 1H).

**<sup>13</sup>C{<sup>1</sup>H} NMR (101 MHz, CDCl<sub>3</sub>):**  $\delta$  (ppm): 172.8 (1C), 140.2 (1C), 128.7 (2C), 127.0 (1C), 126.4 (2C), 76.3 (1C), 54.0 (1C), 49.6 (1C), 46.6 (1C), 41.6 (1C), 41.4 (1C), 36.7 (only found in HSQC, 1C), 36.0 (only found in HSQC, 1C).

**IR (ATR):**  $\nu_{\max}$  = 3399, 2947, 2926, 1601, 1395, 1115, 1043, 764, 699, 516 cm<sup>-1</sup>.

**HRMS (ESI):**  $m/z$  calculated for C<sub>15</sub>H<sub>20</sub>NO<sub>2</sub><sup>+</sup> [M+H]<sup>+</sup>: 246.1489; found: 246.1486.

**3-Methoxy-N,N-dimethyl-4-phenylbicyclo[2.1.1]hexane-1-carboxamide (4):**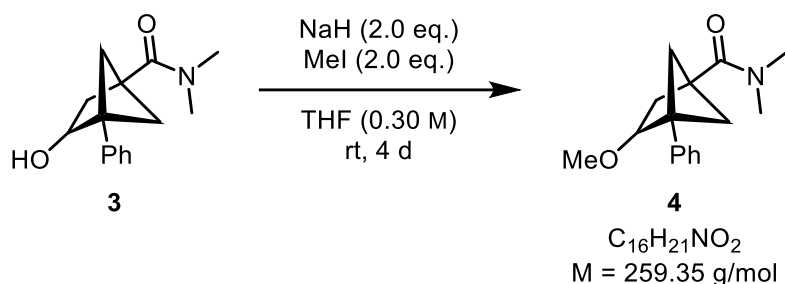

A solution of BCH **3** (12.0 mg, 48.9  $\mu$ mol, 1.00 eq.) in THF (0.16 mL, 0.30 M) was cooled down to 0 °C and NaH (60% dispersion in crude oil, 3.3 mg, 98  $\mu$ mol, 2.0 eq.) was added in one portion. After 10 minutes, MeI (6.1  $\mu$ L, 98  $\mu$ mol, 2.0 eq.) was added, the reaction was allowed to warm to room temperature and stirred over 4 days.

The reaction was neutralised by addition of  $NH_4Cl$  (sat., aq., 2 mL) and diluted with  $CH_2Cl_2$  (2 mL). The aqueous phase was extracted with  $CH_2Cl_2$  ( $4 \times 2$  mL). The combined organic phases were washed with brine (1 mL), dried over anhydrous  $Na_2SO_4$ , filtered and the solvent was removed under reduced pressure. After purification by column chromatography ( $SiO_2$ , 95:5 Pentane:EtOAc  $\rightarrow$  EtOAc) the title compound was obtained as colourless solid (4.3 mg, 17  $\mu$ mol, 33%). Due to the small amount of isolated product, the melting point could not be determined.

$R_f$  = 0.21 (EtOAc)

$^1H$  NMR (300 MHz,  $CDCl_3$ ):  $\delta$  (ppm): 7.34–7.19 (m, 2H), 7.25–7.19 (m, 3H), 3.97 (dt,  $J$  = 7.0, 1.8 Hz, 1H), 3.18 (s, 3H), 3.03 (s, 3H), 2.95 (s, 3H), 2.50–2.43 (m, 1H), 2.40–2.34 (m, 1H), 2.10 (ddd,  $J$  = 6.7, 2.7, 1.5 Hz, 1H), 2.03–1.96 (m, 2H), 1.86 (dt,  $J$  = 11.3, 3.3 Hz, 1H).

$^{13}C\{^1H\}$  NMR (101 MHz,  $CDCl_3$ ):  $\delta$  (ppm): 173.0 (1C), 141.1 (1C), 128.3 (2C), 126.6 (1C), 126.6 (2C), 84.7 (1C), 57.7 (1C), 53.2 (1C), 49.3 (1C), 46.9 (1C), 42.4 (1C), 40.0 (1C), 37.0 (1C), 36.1 (1C).

IR (ATR):  $\nu_{max}$  = 2935, 2877, 2360, 1628, 1396, 1118, 1072, 763, 700, 573  $cm^{-1}$ .

HRMS (ESI):  $m/z$  calculated for  $C_{16}H_{21}O_3NaCH_3OH^+$   $[M+Na+MeOH]^+$ : 314.1727; found: 314.1726.

**3-Hydroxy-4-phenylbicyclo[2.1.1]hexan-1-yl(phenyl)methanone (6):**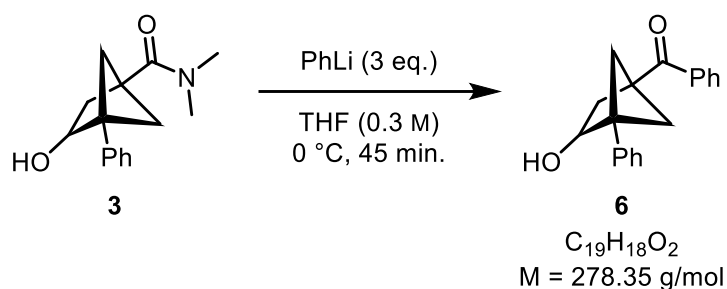

BCH **3** (7.2 mg, 29  $\mu\text{mol}$ , 1.0 eq.) was dissolved in PhMe (1 mL), the solution was stirred for 5 minutes, concentrated *in vacuo* and dried for 45 minutes under fine vacuum. The residue was dissolved in THF (0.1 mL, 0.3 M), cooled to 0 °C and PhLi (1.9 M in dibutylether, 0.05 mL, 9  $\mu\text{mol}$ , 3 eq.) was added dropwise over one minute.

After stirring for 45 minutes, the reaction was neutralised by addition of  $\text{NH}_4\text{Cl}$  (sat., aq., 1 mL) and diluted with  $\text{H}_2\text{O}$  (2 mL) and  $\text{CH}_2\text{Cl}_2$  (2 mL). The aqueous phase was extracted with  $\text{CH}_2\text{Cl}_2$  (4  $\times$  2 mL). The combined organic phases were washed with brine (1 mL), dried over anhydrous  $\text{Na}_2\text{SO}_4$ , filtered and the solvent was removed under reduced pressure. After purification by column chromatography ( $\text{SiO}_2$ , 85:15 Pentane:EtOAc) the title compound was obtained as pale yellow solid (6.4 mg, 23  $\mu\text{mol}$ , 78%). Due to the small amount of isolated product, the melting point could not be determined.

$R_f = 0.31$  (85:15 Pentane:EtOAc)

$^1\text{H NMR}$  (300 MHz,  $\text{CDCl}_3$ ):  $\delta$  (ppm): 7.97–7.94 (m, 2H), 7.60–7.54 (m, 1H), 7.49–7.42 (m, 2H), 7.39–7.34 (m, 2H), 7.30–7.26 (m, 1H), 7.25–7.22 (m, 2H), 4.52–4.49 (m, 1H), 2.80–2.72 (m, 1H), 2.62 (ddd,  $J = 11.6, 7.3, 2.7 \text{ Hz}$ , 1H), 2.27–2.23 (m, 1H), 2.21–2.16 (m, 2H), 2.08 (dt,  $J = 11.7, 3.1 \text{ Hz}$ , 1H), 1.89–1.76 (bs, 1H).

$^{13}\text{C}\{^1\text{H}\}$  NMR (101 MHz,  $\text{CDCl}_3$ ):  $\delta$  (ppm): 201.3 (1C), 140.1 (1C), 136.3 (1C), 133.2 (1C), 128.8 (2C), 128.7 (2C), 128.7 (2C), 127.1 (1C), 126.4 (2C), 76.5 (1C), 55.1 (1C), 54.8 (1C), 46.4 (1C), 43.9 (1C), 42.3 (1C).

IR (ATR):  $\nu_{\text{max}} = 3439, 2951, 2926, 1662, 1447, 1261, 1040, 875, 759, 699 \text{ cm}^{-1}$ .

HRMS (ESI):  $m/z$  calculated for  $\text{C}_{19}\text{H}_{18}\text{O}_2\text{Na}^+$  [ $\text{M}+\text{Na}$ ] $^+$ : 301.1199; found: 301.1208.

**(2S-Phenylbicyclo[2.1.1]hexan-2-yl)methanol (8):**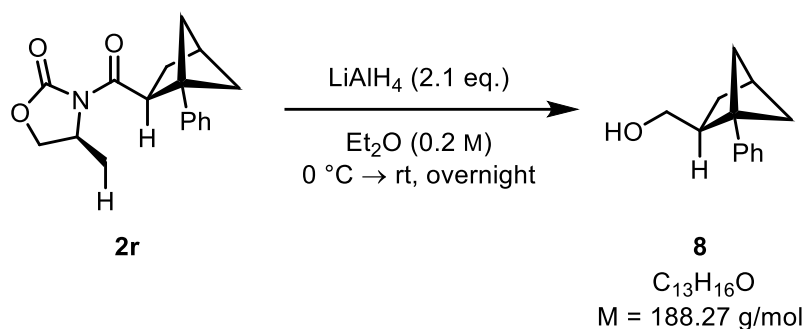

At  $0\text{ }^\circ\text{C}$   $\text{LiAlH}_4$  (8.8 mg, 0.32 mmol, 2.1 eq.) was added to a solution of BCH **2r** (40.0 mg, 111  $\mu\text{mol}$ , 1.00 eq.) in  $\text{Et}_2\text{O}$  (0.5 mL, 0.2 M). After 6 hours the ice bath was removed and the reaction was stirred overnight. The reaction was quenched by addition of water (1 mL) at  $0\text{ }^\circ\text{C}$ . The crude mixture was diluted NaOH (1 M, aq., 1 mL), water (2 mL) and  $\text{Et}_2\text{O}$  (5 mL).  $\text{MgSO}_4$  was added, the suspension was stirred for 15 minutes at room temperature, filtered and the filter cake was washed with  $\text{EtOAc}$  ( $4 \times 20\text{ mL}$ ). The solvent was removed under reduced pressure and the crude product was purified by column chromatography ( $\text{SiO}_2$ , 85:15 Pentane: $\text{EtOAc}$ ) to obtain the title compound as pale yellow oil (26.5 mg, 29.2  $\mu\text{mol}$ , 26%).

$R_f = 0.33$  (85:15 Pentane: $\text{EtOAc}$ )

$^1\text{H NMR}$  (500 MHz,  $\text{CDCl}_3$ ):  $\delta$  (ppm) 7.33–7.28 (m, 2H), 7.22–7.19 (m, 1H), 7.19–7.16 (m, 2H), 3.65 (dd,  $J = 11.1, 7.2\text{ Hz}$ , 1H), 3.50 (t,  $J = 9.1\text{ Hz}$ , 1H), 2.50 (tt,  $J = 2.9, 1.5\text{ Hz}$ , 1H), 2.41 (dtdd,  $J = 8.5, 7.0, 4.2, 1.5\text{ Hz}$ , 1H), 2.08 (dddd,  $J = 11.1, 8.8, 2.4, 1.6\text{ Hz}$ , 1H), 1.78–1.73 (m, 2H), 1.71–1.64 (m, 2H), 1.41 (dddd,  $J = 11.1, 4.1, 2.7, 1.4\text{ Hz}$ , 1H).

$^{13}\text{C}\{^1\text{H}\}$  NMR (126 MHz,  $\text{CDCl}_3$ ): 143.7 (1C), 128.7 (2C), 126.4 (1C), 125.7 (2C), 65.7 (1C), 56.3 (1C), 47.0 (1C), 46.7 (1C), 37.3 (1C), 35.7 (1C), 33.4 (1C).

IR (ATR):  $\nu_{\text{max}} = 2960, 2872, 2360, 1745, 1501, 1044, 1038, 999, 991, 697, 565\text{ cm}^{-1}$ .

HRMS (ESI):  $m/z$  calculated for  $\text{C}_{13}\text{H}_{16}\text{ONa}^+$   $[\text{M}+\text{Na}]^+$ : 211.1093; found: 211.1096.

$[\alpha]_{\text{D}}^{23}$ :  $+37.1853^\circ$  ( $c = 0.14\text{ g/dL}$ ,  $\text{CH}_2\text{Cl}_2$ ).

**1-Phenylbicyclo[2.1.1]hexan-2-yl acetate (9):**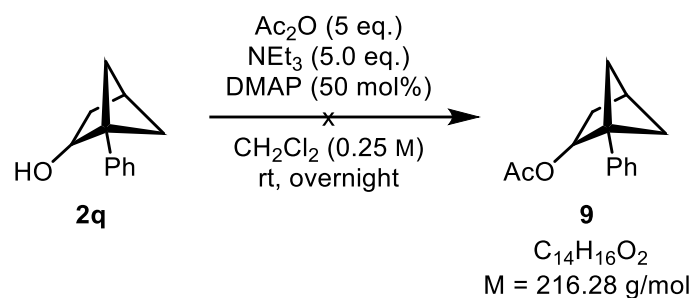

At 0 °C NEt<sub>3</sub> (0.10 mL, 0.746 mmol, 5.0 eq.) and Ac<sub>2</sub>O (0.07 mL, 0.746 mmol, 5 eq.) were added to a solution of BCH **2q** (26.0 mg, 0.149 mmol, 1.00 eq.) and 4-Dimethylaminopyridine (9.1 mg, 75 μmol, 50 mol%) in CH<sub>2</sub>Cl<sub>2</sub> (0.25 mL, 0.25 M). The reaction was allowed to warm to room temperature overnight, NH<sub>4</sub>Cl (sat., aq., 3 mL) and water (5 mL) were added and the aqueous phase was extracted with CH<sub>2</sub>Cl<sub>2</sub> (3 × 10 mL). The combined organic phases were washed with Brine (3 mL), dried over anhydrous Na<sub>2</sub>SO<sub>4</sub>, filtered and the solvent was removed under reduced pressure. After purification by column chromatography (SiO<sub>2</sub>, 95:5 Pentane:EtOAc) the title compound was obtained as pale yellow oil (31 mg, 0.143 mmol, 96%).

**R<sub>f</sub>** = 0.27 (95:5 Pentane:EtOAc)

**<sup>1</sup>H NMR (300 MHz, CDCl<sub>3</sub>):** δ (ppm) 7.33–7.26 (m, 2H), 7.25–7.17 (m, 3H), 5.21 (dt, *J* = 7.3, 1.9 Hz, 1H), 2.53–2.48 (m, 1H), 2.47–2.37 (m, 1H), 2.02–1.88 (m, 5H), 1.83 (dt, *J* = 7.0, 3.4 Hz, 1H), 1.67–1.56 (m, 2H).

**<sup>13</sup>C{<sup>1</sup>H} NMR (75 MHz, CDCl<sub>3</sub>):** 171.3(1C), 141.2 (1C), 128.2 (2C), 126.5 (1C), 126.4 (2C), 77.7 (1C), 57.5 (1C), 43.7 (1C), 39.2 (1C), 38.9 (1C), 35.0 (1C), 21.3 (1C).

**IR (ATR):**  $\nu_{\max}$  = 2975, 2949, 1731, 1373, 1286, 1241, 1210, 1075, 1039, 760, 699 cm<sup>-1</sup>.

**HRMS (ESI):** *m/z* calculated for C<sub>14</sub>H<sub>16</sub>O<sub>2</sub>Na<sup>+</sup> [M+Na]<sup>+</sup>: 239.1043; found: 239.1042.

**1-Phenylbicyclo[2.1.1]hexane-5-carboxylic acid (10):**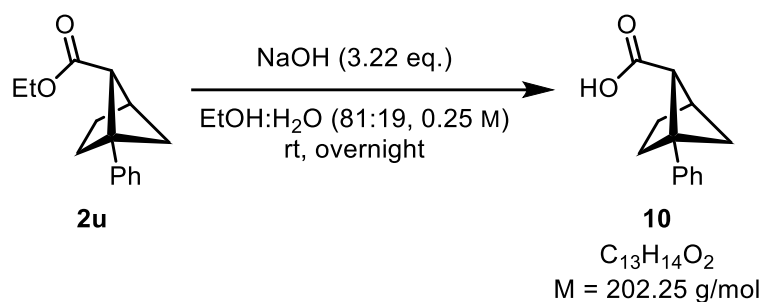

**Step 1:** At 0 °C BCH **2u** (28.8 mg, 0.125 mmol, 1.00 eq.) in EtOH (0.85 mL, 0.15 M) was added to NaOH (2.5 M, aq., 0.15 mL). The reaction was warmed to room temperature and stirred overnight.  $\text{NH}_4\text{Cl}$  (sat., aq., 5 mL) and water (3 mL) were added and the aqueous phase was extracted with  $\text{CH}_2\text{Cl}_2$  (4 × 10 mL). The combined organic phases were washed with Brine (2 mL), dried over anhydrous  $\text{Na}_2\text{SO}_4$ , filtered and the solvent was removed under reduced pressure.

**Step 2:** The residue was redissolved in EtOH:H<sub>2</sub>O (81:19, 0.25 M) and NaOH (16.1 mg, 0.403 mmol, 3.22 eq.) was added at 0 °C. The ice bath was removed and the reaction was stirred overnight. The crude reaction mixture was diluted with water (10 mL), washed with EtOAc (2 × 2 mL), acidified with HCl (1 M, aq.) and extracted with EtOAc (4 × 10 mL). The combined organic phases were washed with Brine (1 mL), dried over anhydrous  $\text{Na}_2\text{SO}_4$ , filtered and the solvent was removed under reduced pressure to obtain the title compound as pale brown oil (19.1 mg, 94.4 μmol, 75%). Data were consistent with that reported in literature.<sup>21</sup>

**<sup>1</sup>H NMR (300 MHz, CDCl<sub>3</sub>):** δ (ppm) 7.39 (dd, *J* = 8.5, 1.5 Hz, 2H), 7.32 (t, *J* = 7.4 Hz, 2H), 7.26–7.19 (m, 1H), 2.83 (s, 1H), 2.72 (s, 1H), 2.29–2.19 (m, 1H), 2.09–1.97 (m, 1H), 1.91–1.81 (m, 2H), 1.74 (dd, *J* = 6.5, 2.7 Hz, 1H), 1.38 (d, *J* = 6.5 Hz, 1H).

**<sup>13</sup>C{<sup>1</sup>H} NMR (75 MHz, CDCl<sub>3</sub>):** 177.0 (1C), 141.8 (1C), 128.3 (2C), 126.8 (2C), 126.1 (1C), 57.5 (1C), 52.7 (1C), 42.2 (1C), 40.1 (1C), 30.0 (1C), 26.7 (1C).

## 7 NMR Spectra

## 7.1 NMR Spectra of compounds towards dienes 1a–ab

Petatis reagent:  $^1\text{H}$  NMR (300 MHz,  $\text{CDCl}_3$ )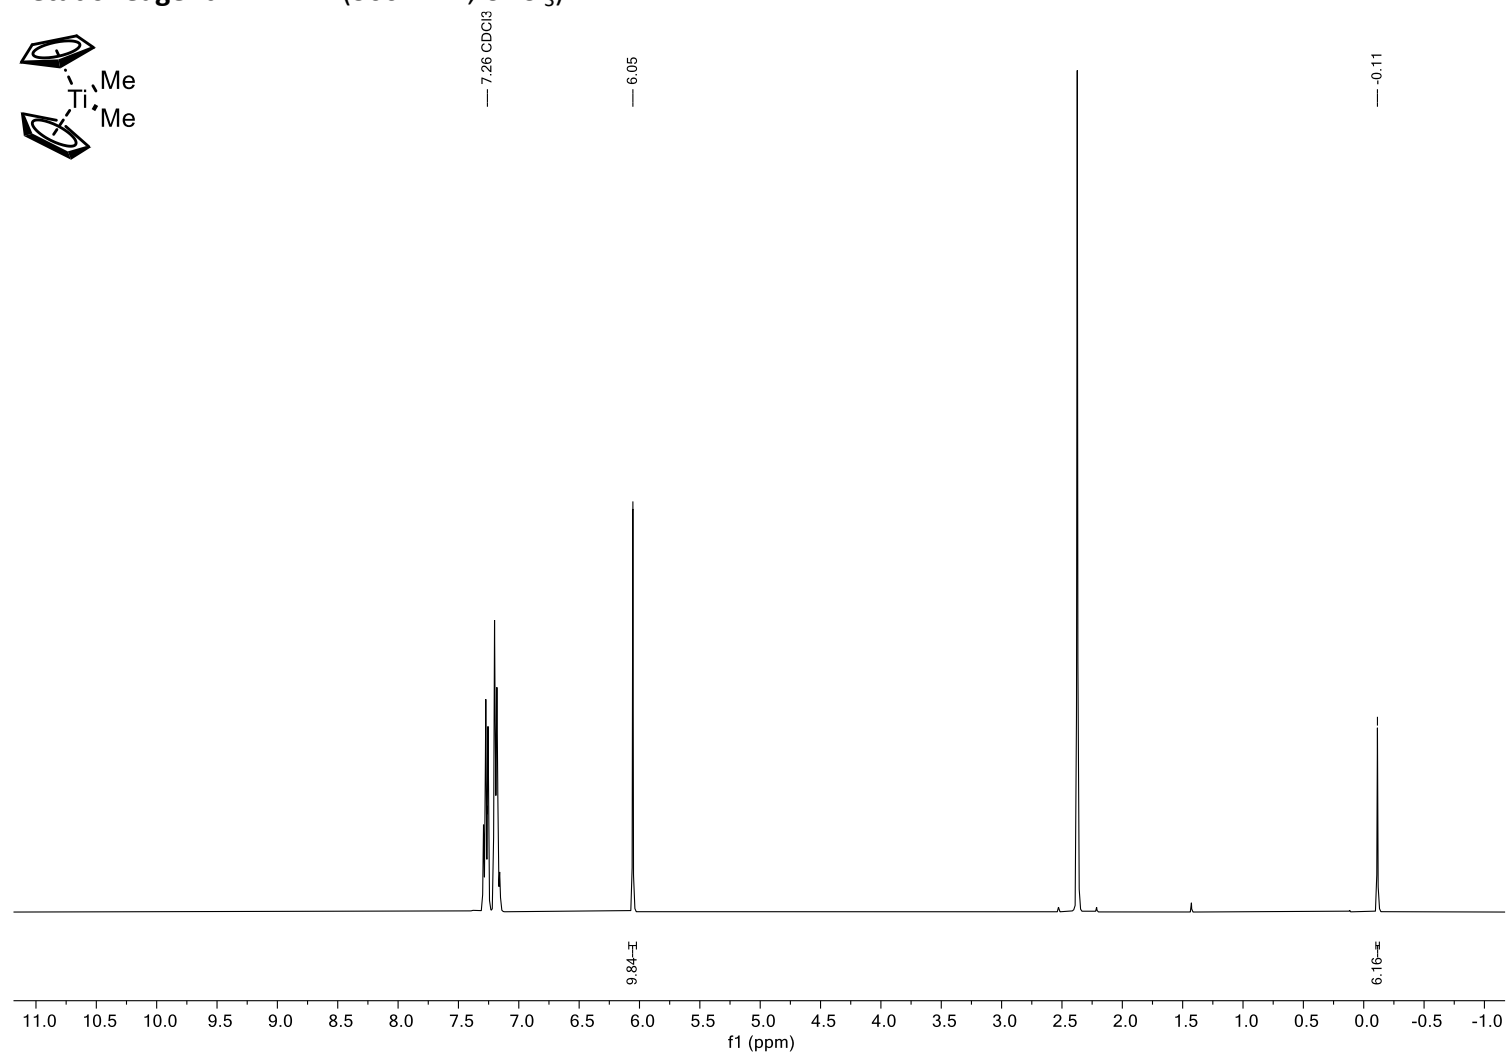



Petasis reagent:  $^{13}\text{C}\{^1\text{H}\}$  NMR (101 MHz,  $\text{CDCl}_3$ )

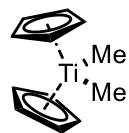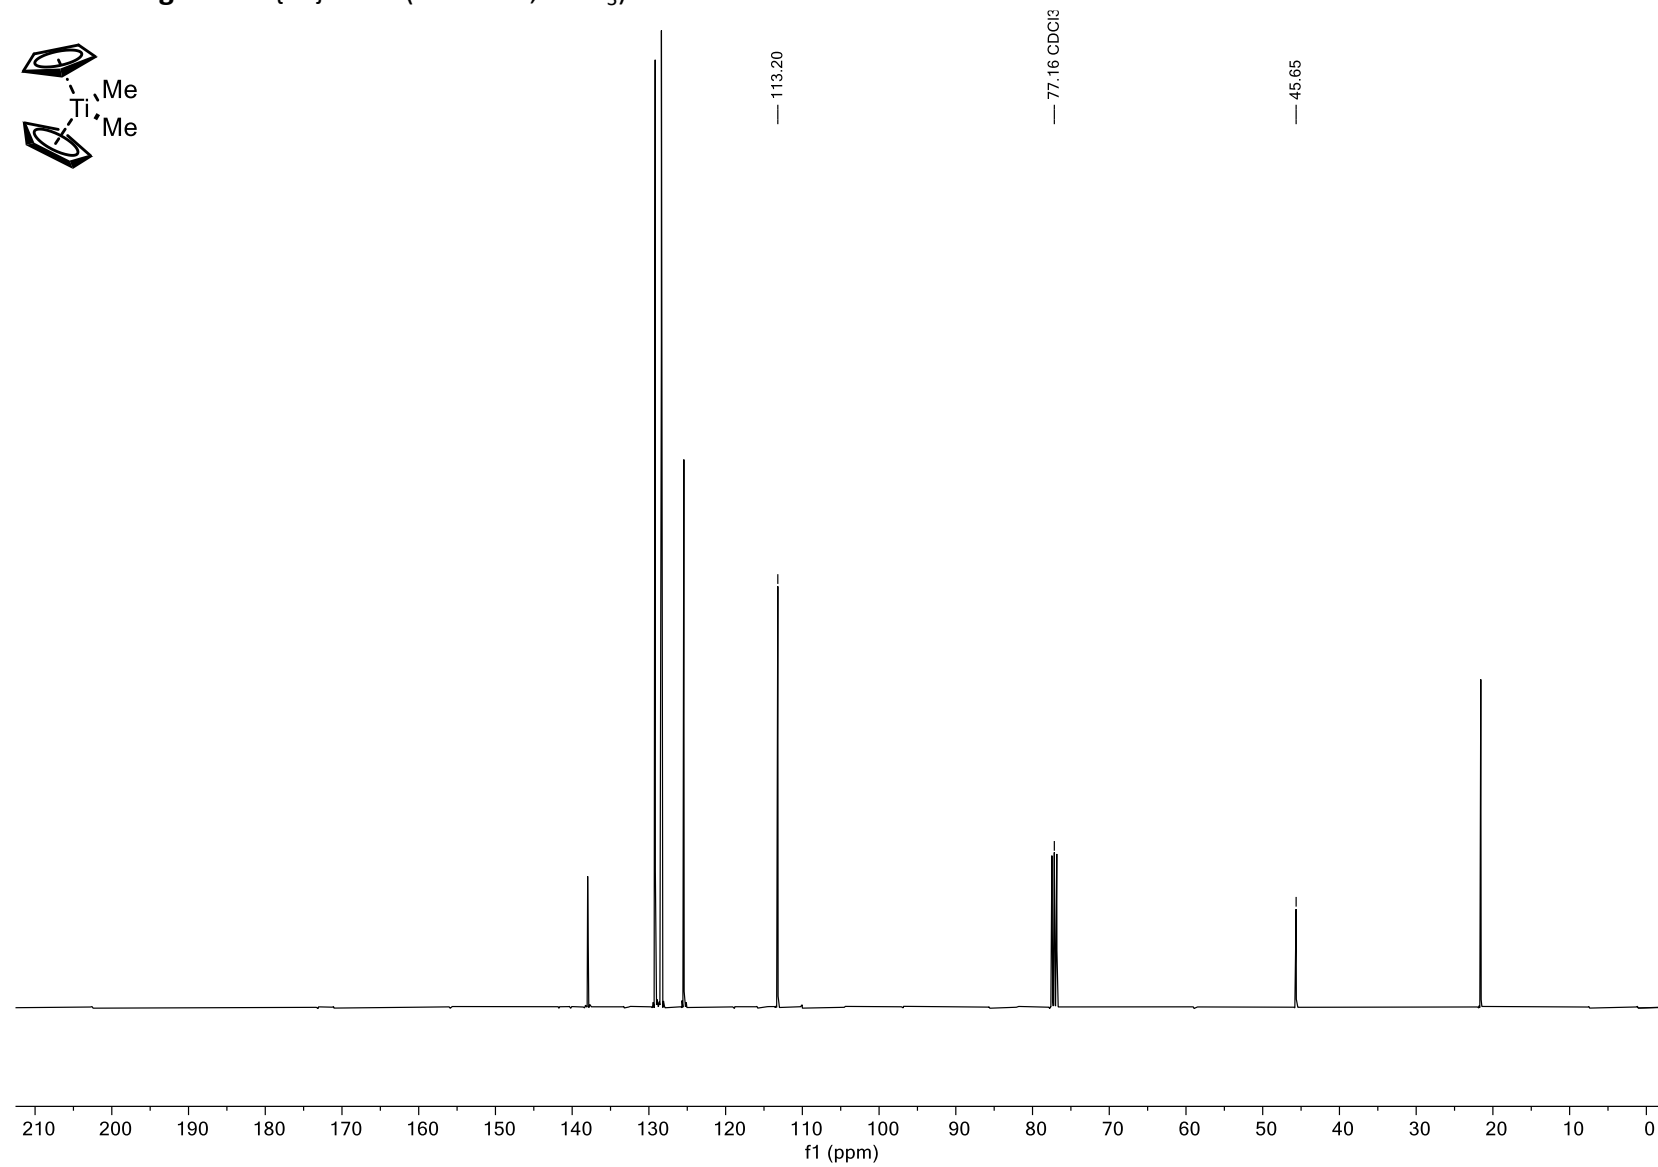

**1,4-Diphenylbutane-1,4-dione (S1):  $^1\text{H}$  NMR (300 MHz,  $\text{CDCl}_3$ )**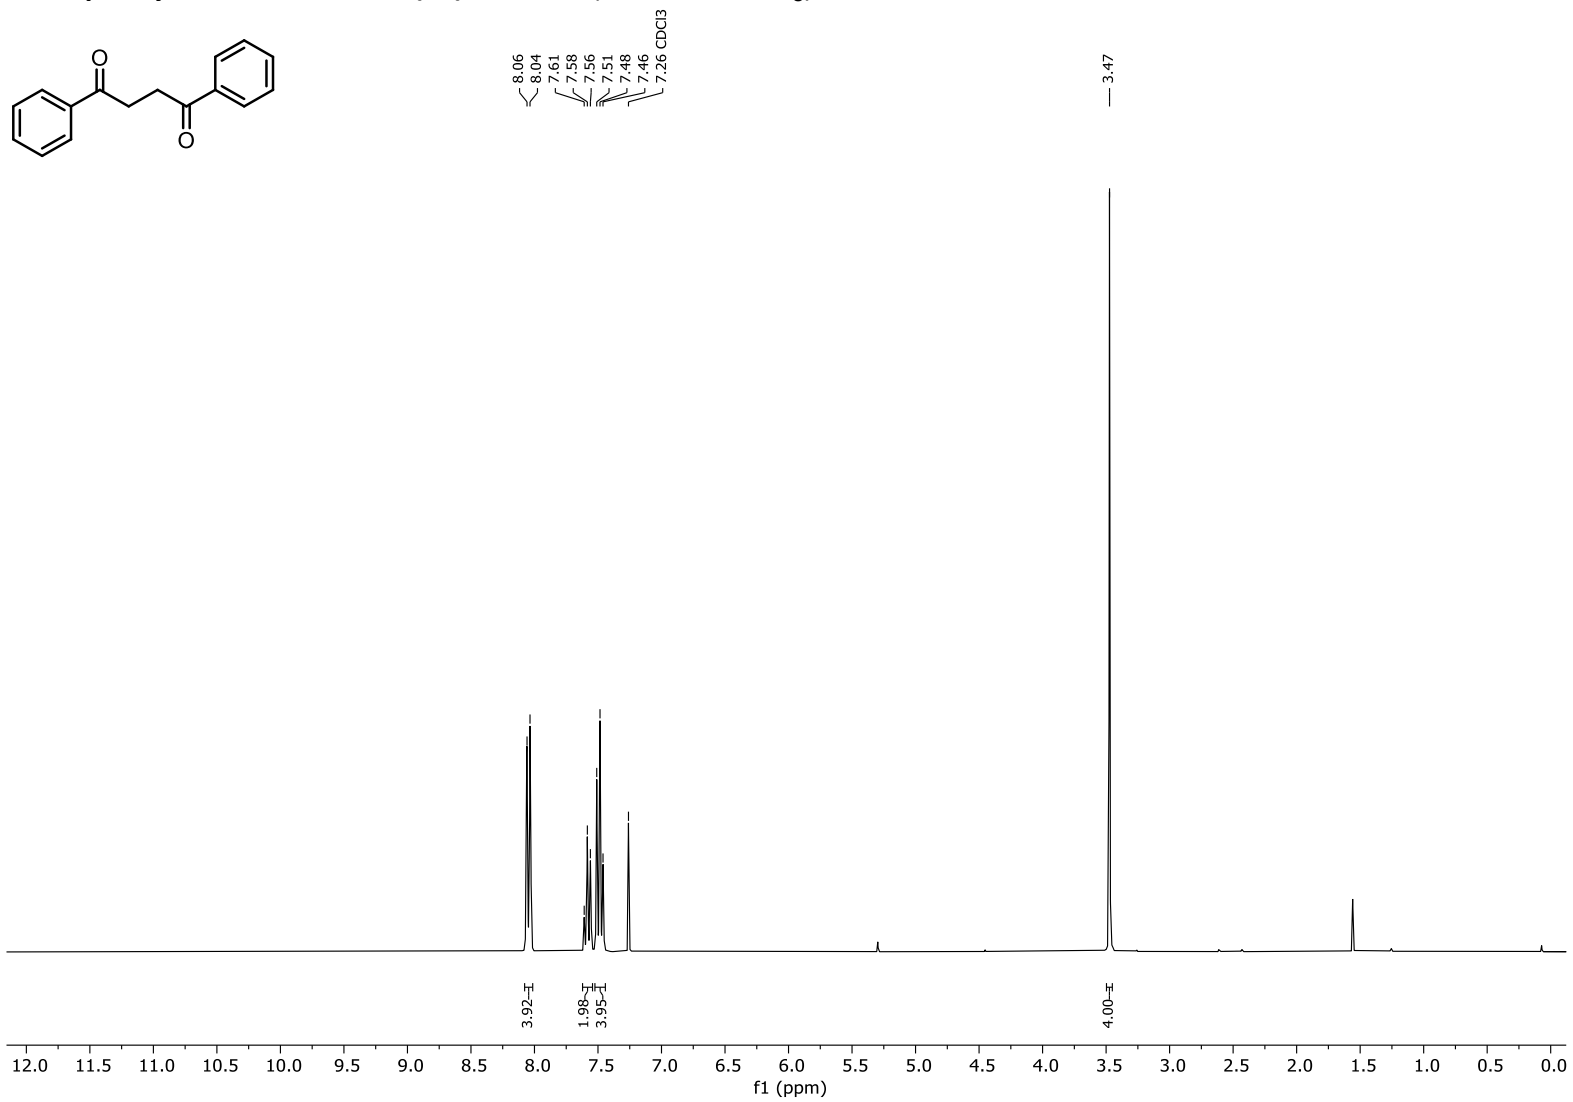

**1,4-Diphenylbutane-1,4-dione (S1):**  $^{13}\text{C}\{^1\text{H}\}$  NMR (101 MHz,  $\text{CDCl}_3$ )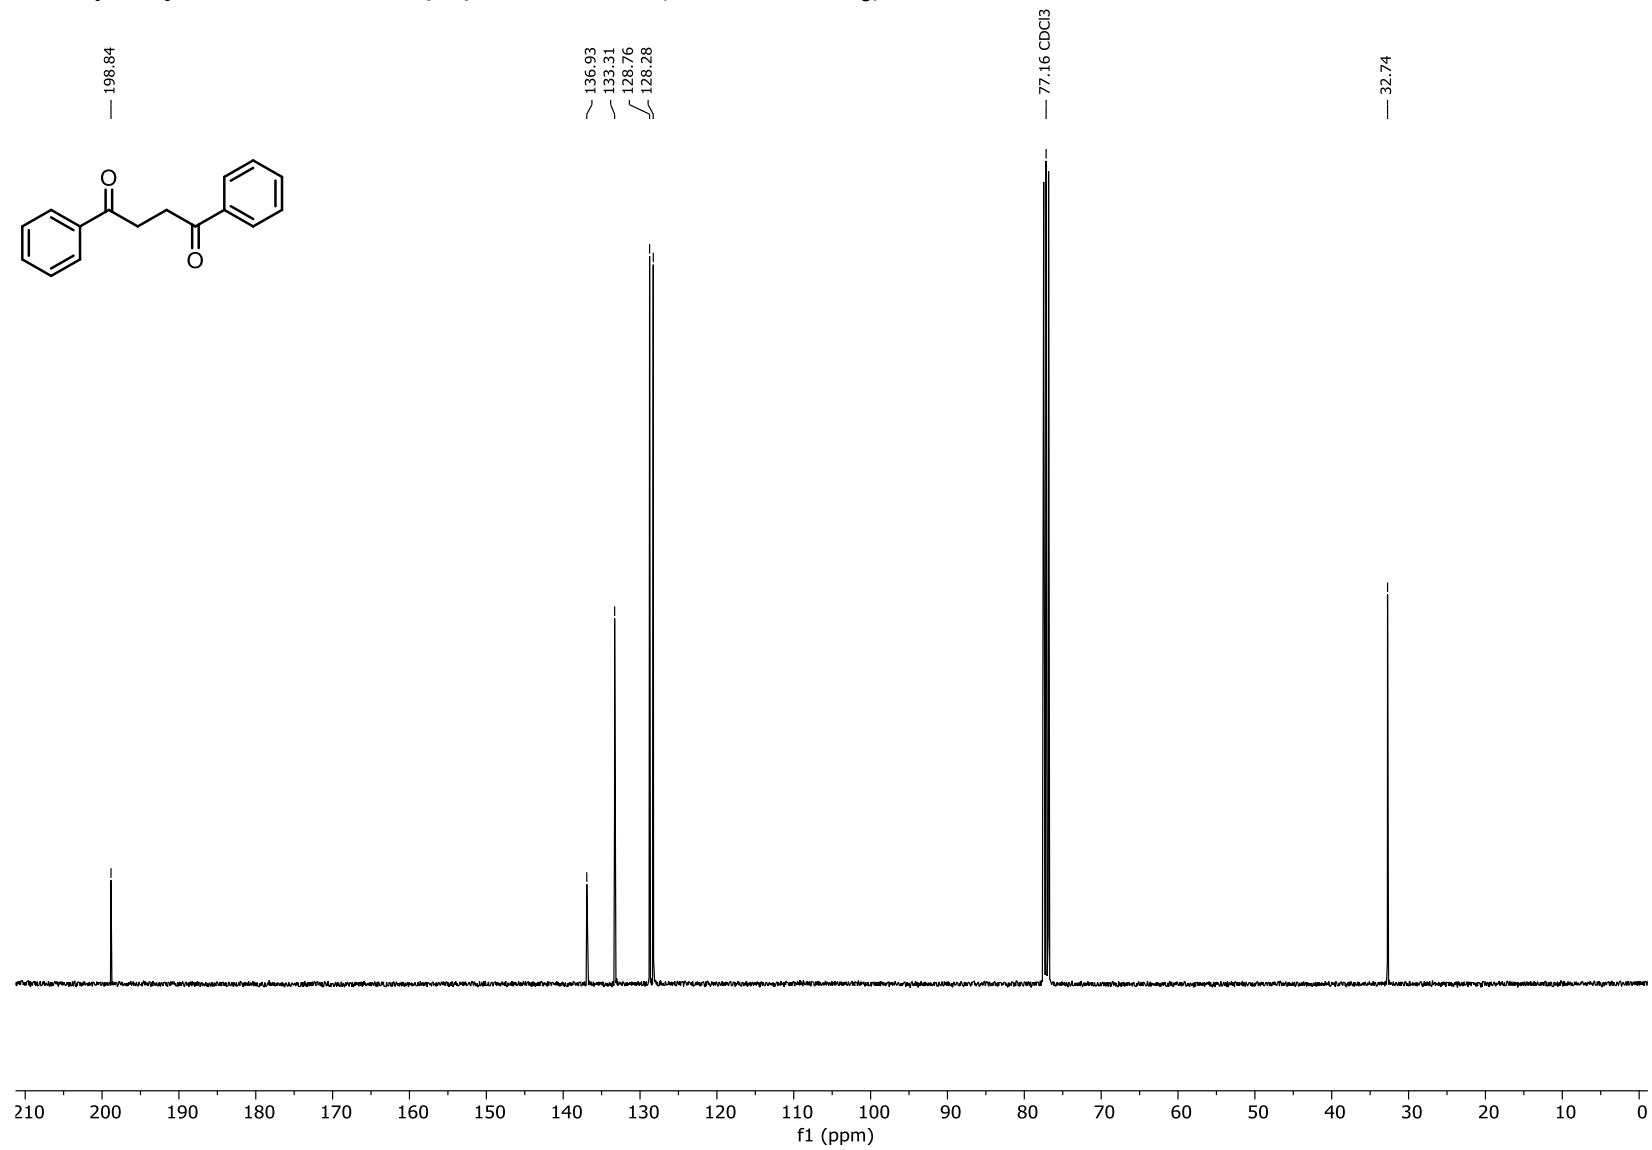

Hexa-1,5-diene-2,5-diylidibenzene (1a):  $^1\text{H}$  NMR (300 MHz,  $\text{CDCl}_3$ )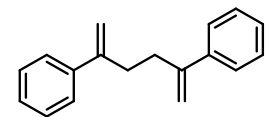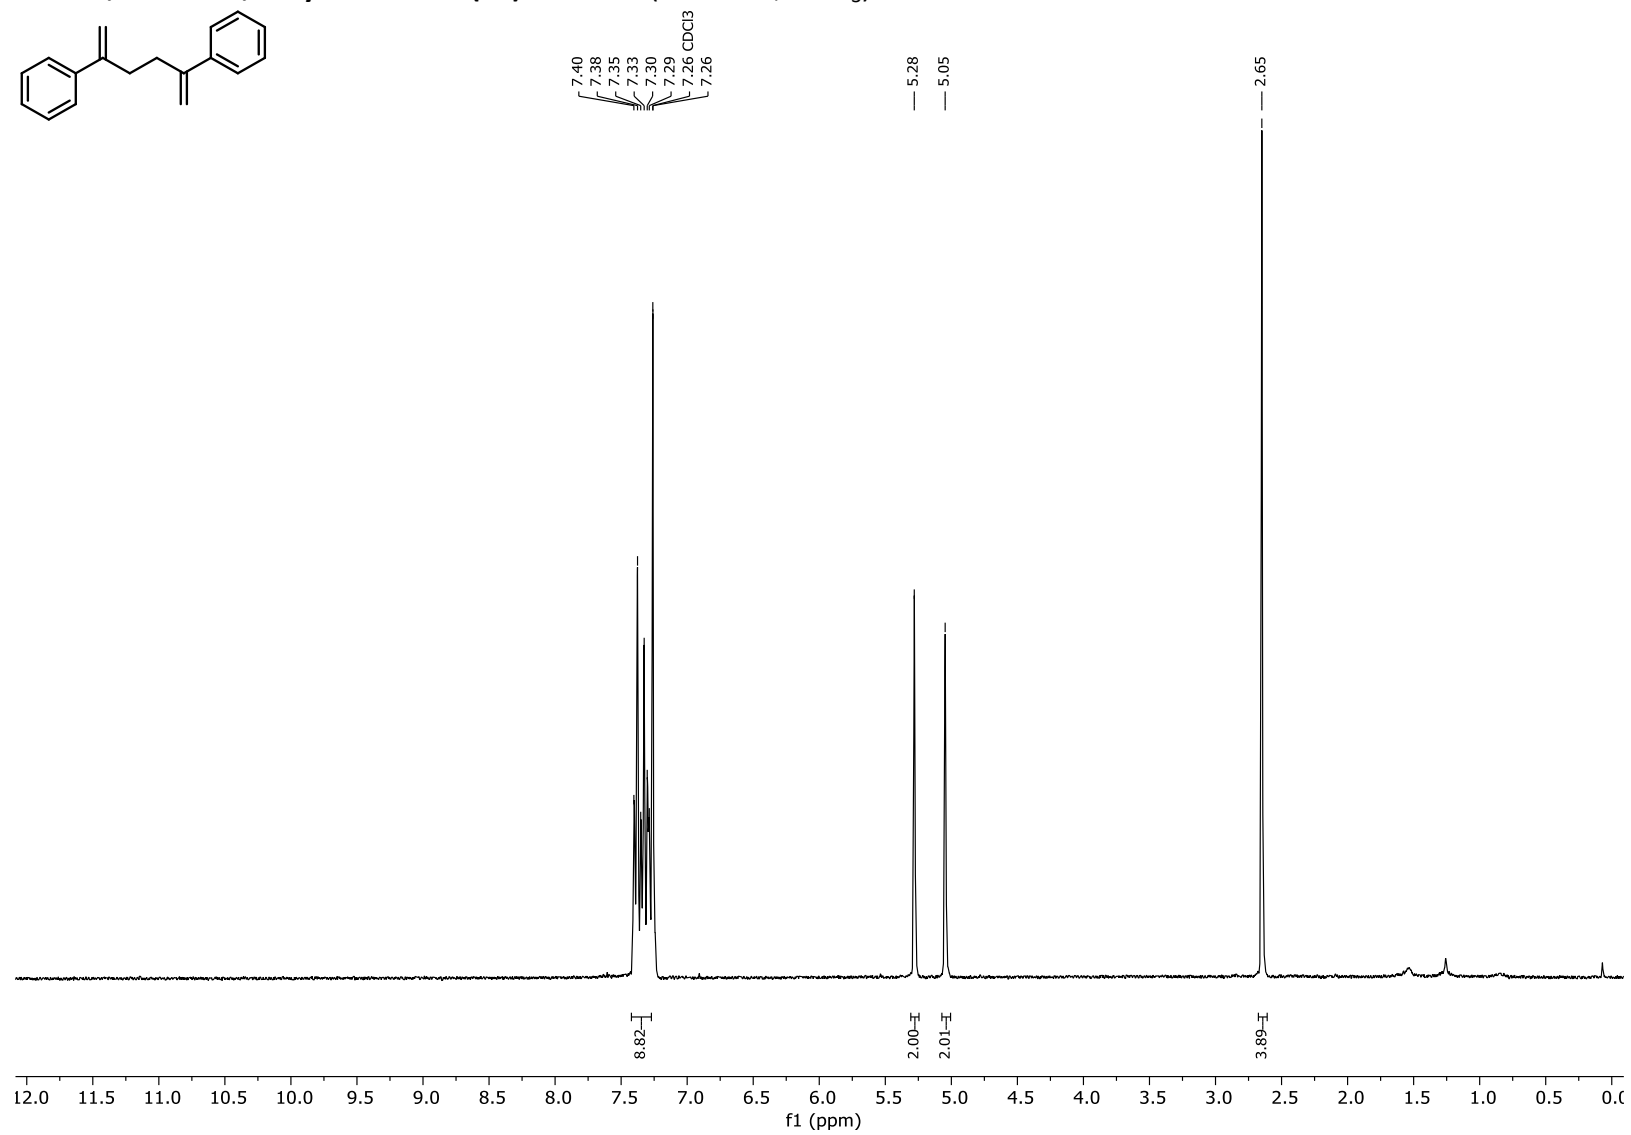

Hexa-1,5-diene-2,5-diylidibenzene (1a):  $^{13}\text{C}\{^1\text{H}\}$  NMR (101 MHz,  $\text{CDCl}_3$ )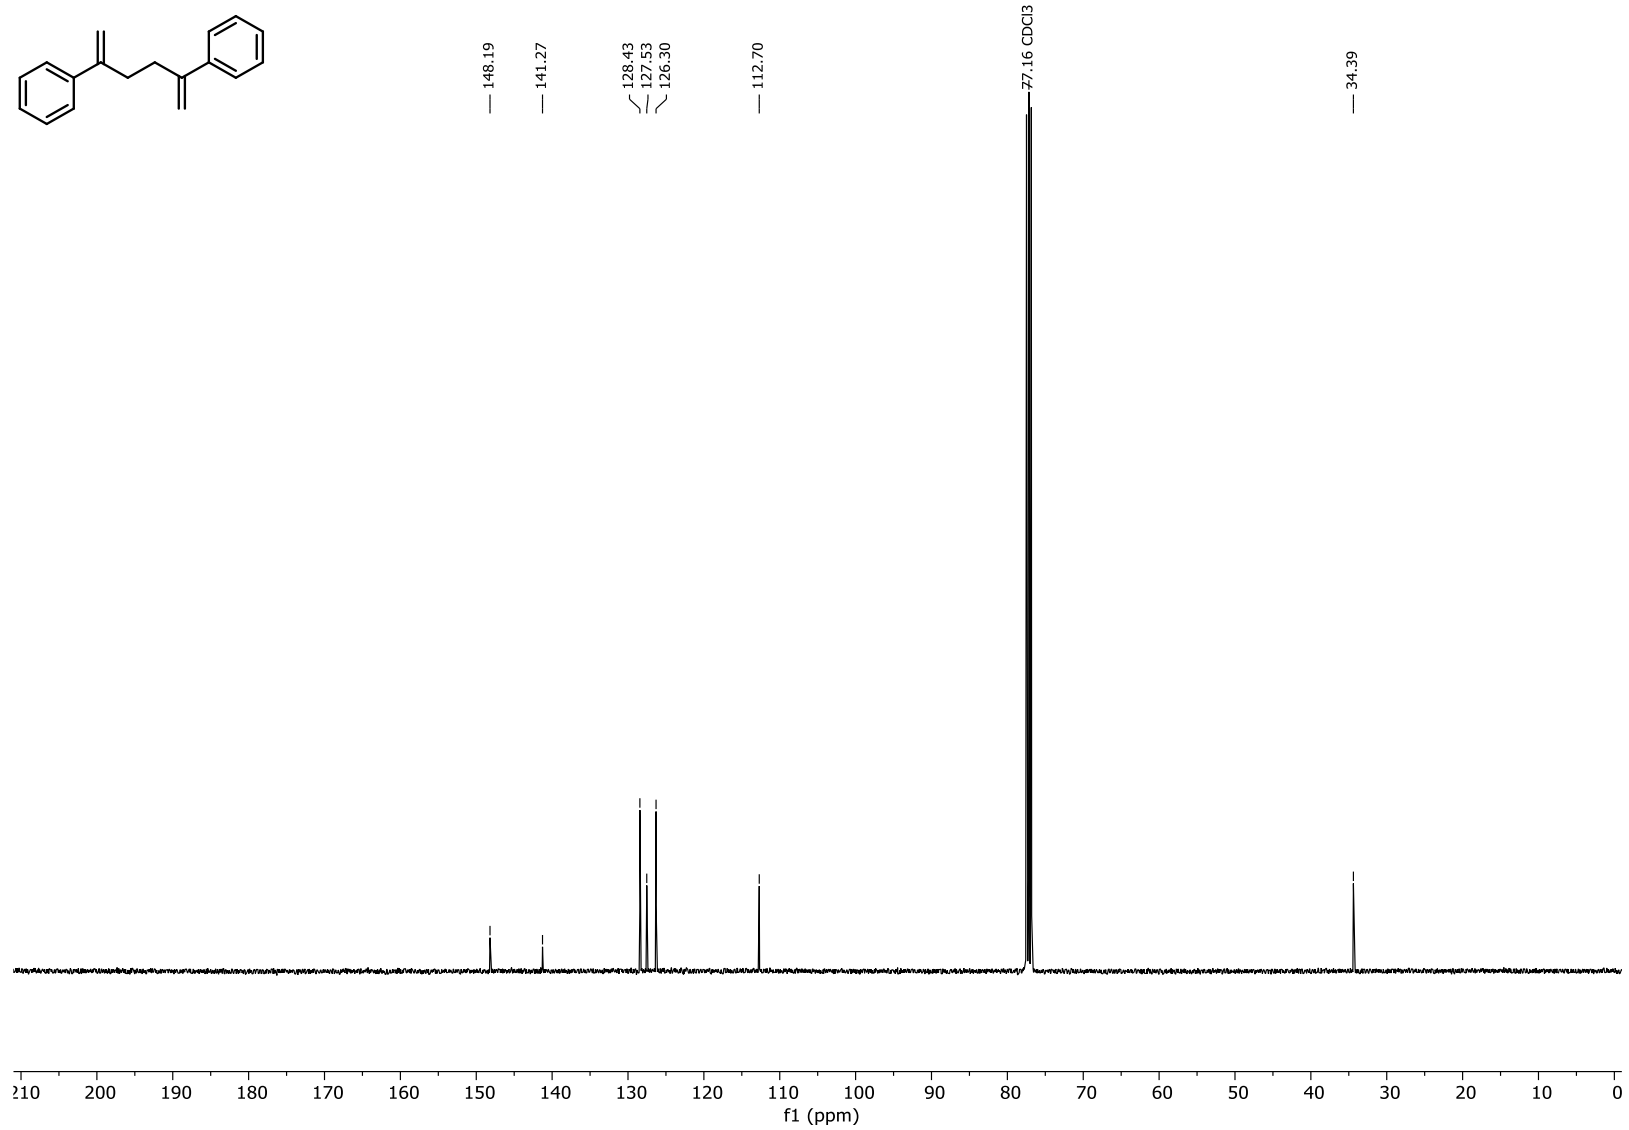

1-Phenylpent-4-en-1-one (S2):  $^1\text{H}$  NMR (300 MHz,  $\text{CDCl}_3$ )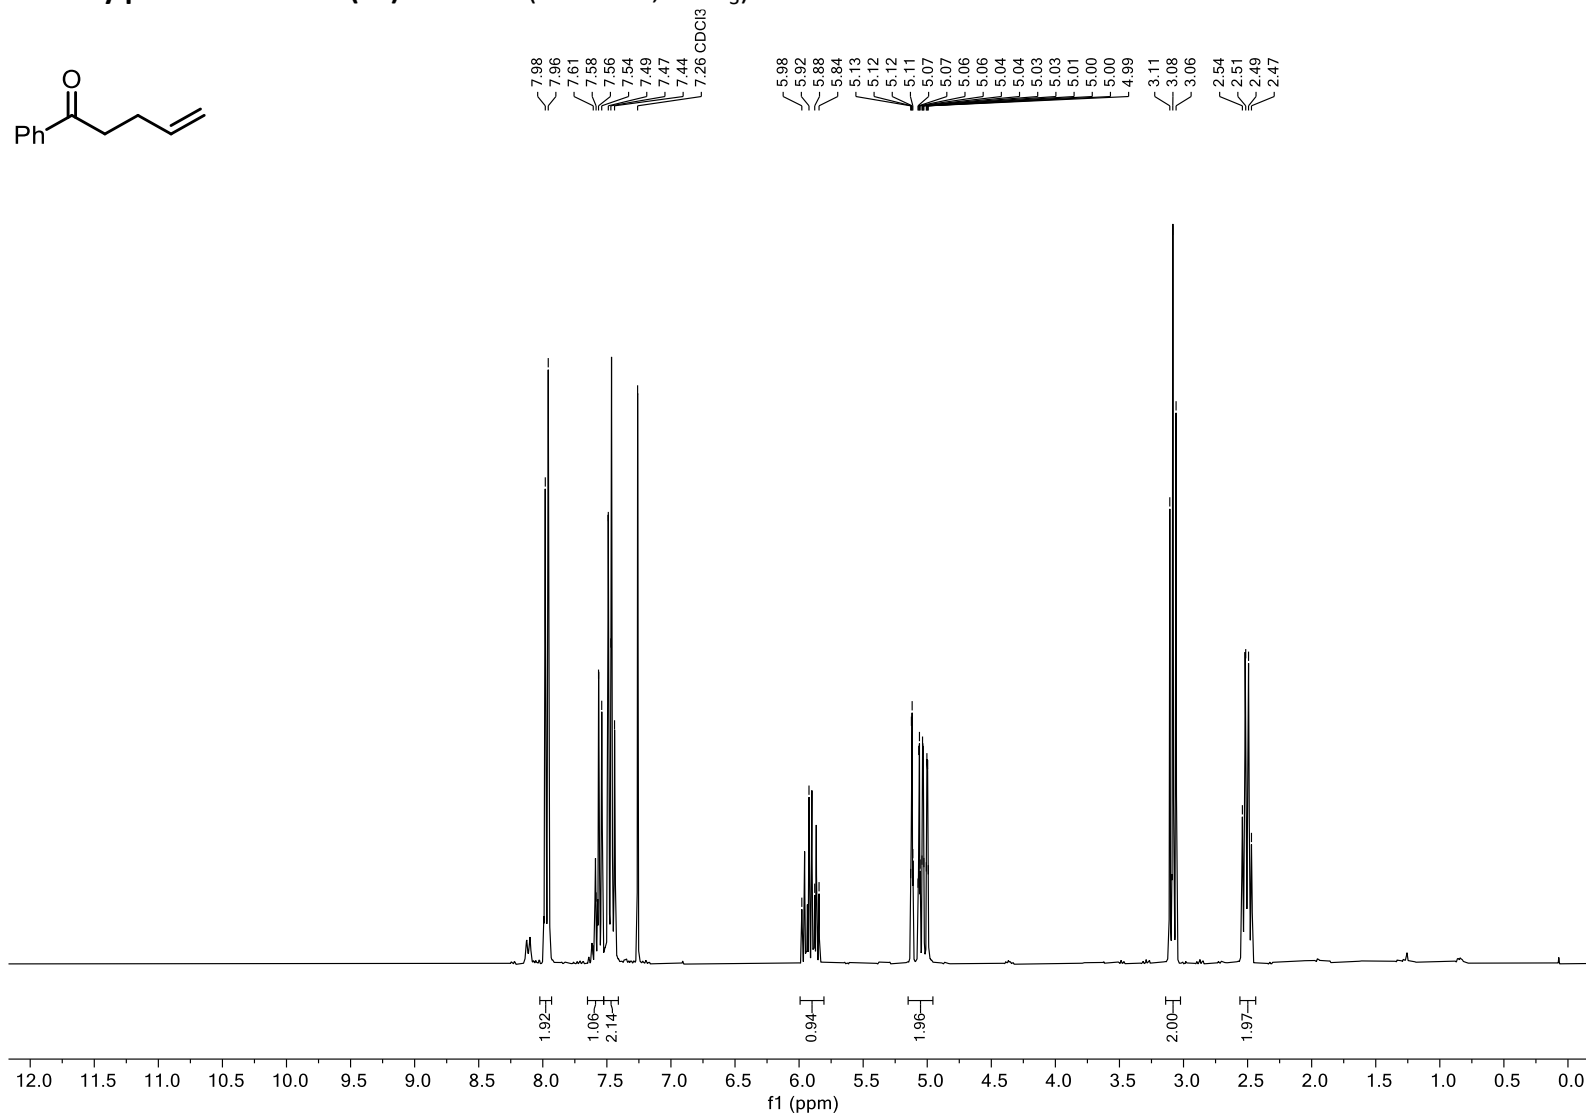

**1-Phenylpent-4-en-1-one (S2):**  $^{13}\text{C}\{^1\text{H}\}$  NMR (101 MHz,  $\text{CDCl}_3$ )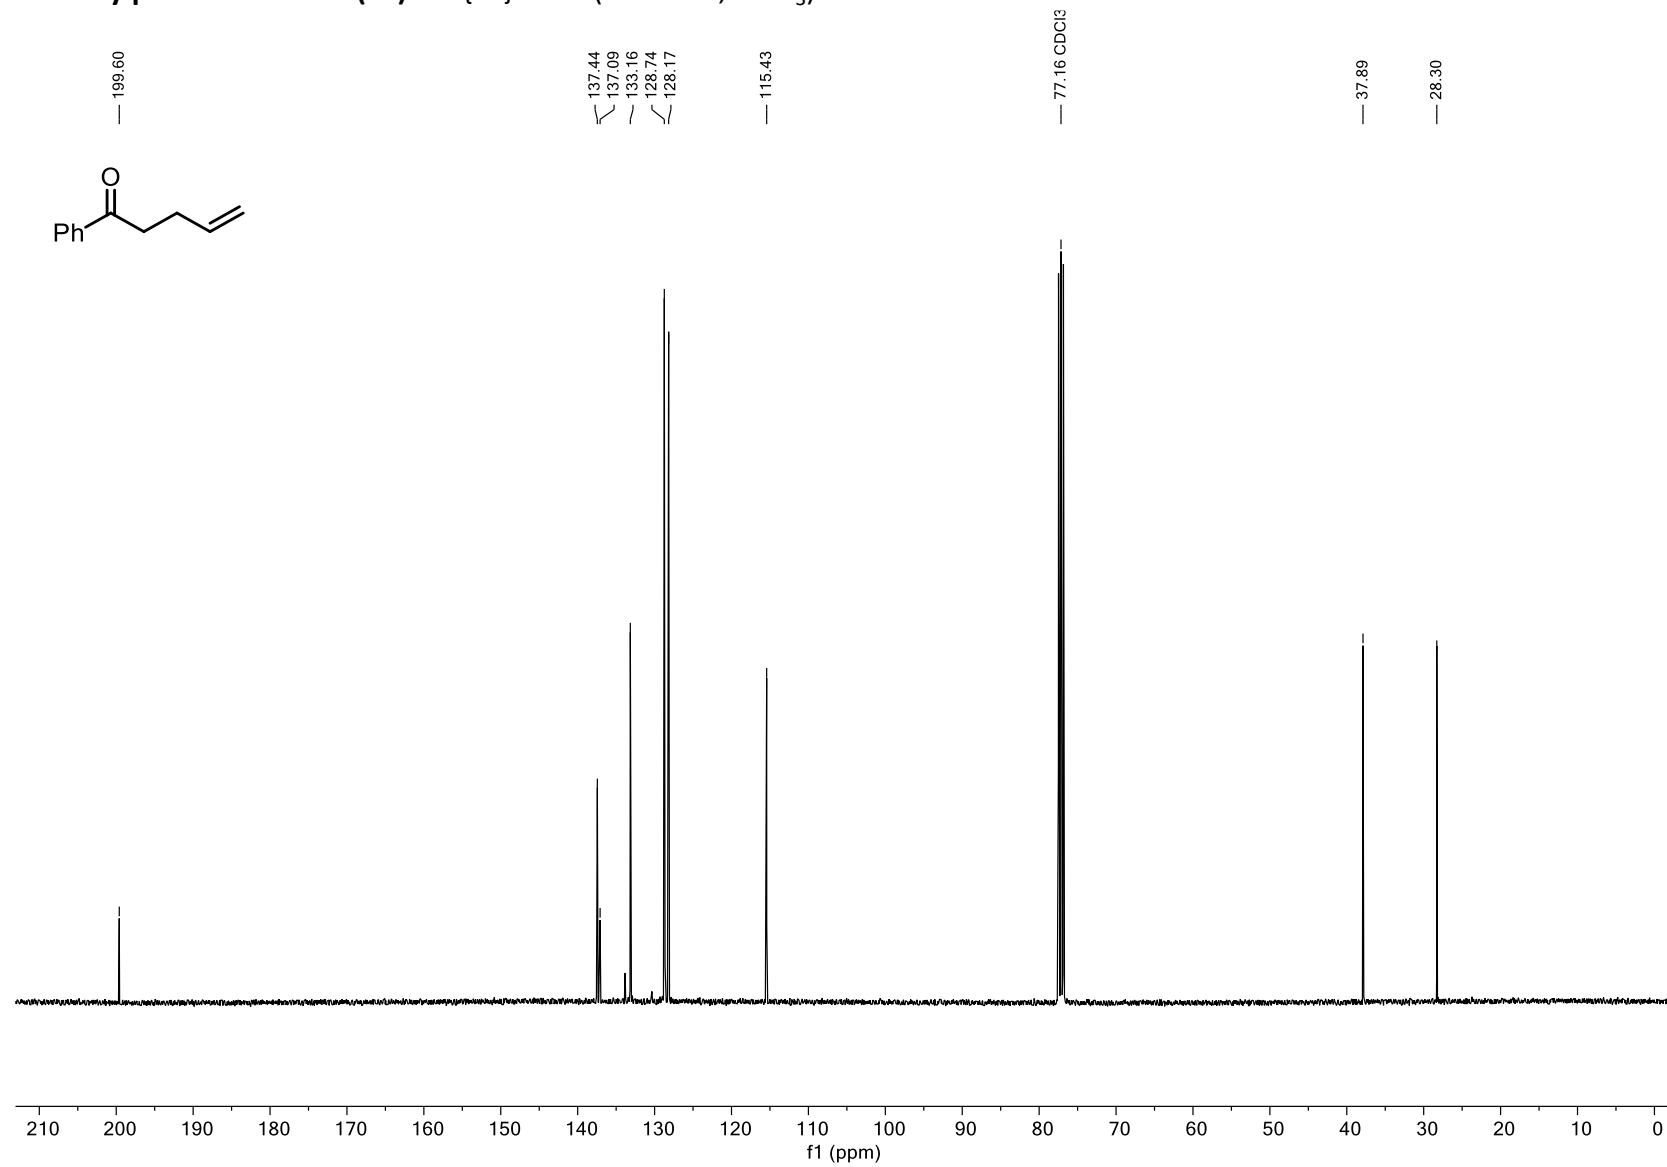

Hexa-1,5-dien-2-ylbenzene (1b):  $^1\text{H}$  NMR (300 MHz,  $\text{CDCl}_3$ )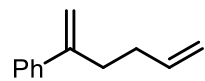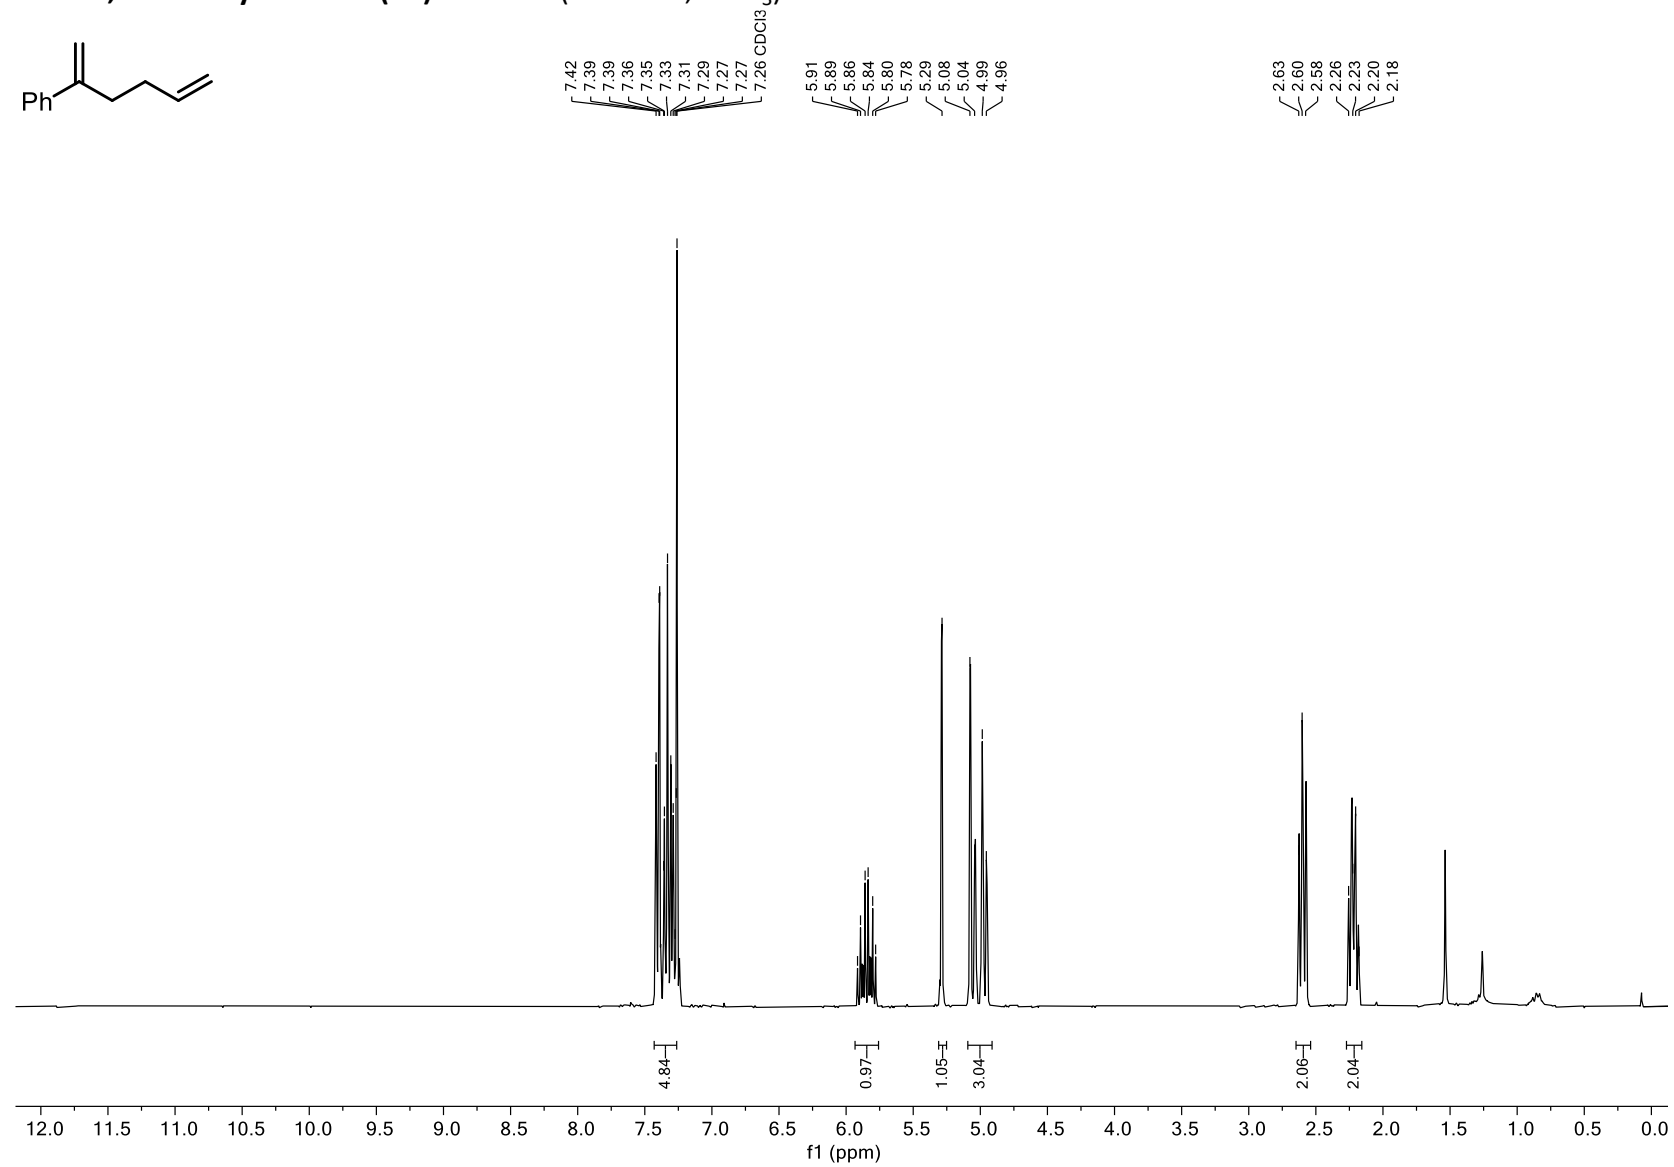



Hexa-1,5-dien-2-ylbenzene (1b):  $^{13}\text{C}\{^1\text{H}\}$  NMR (101 MHz,  $\text{CDCl}_3$ )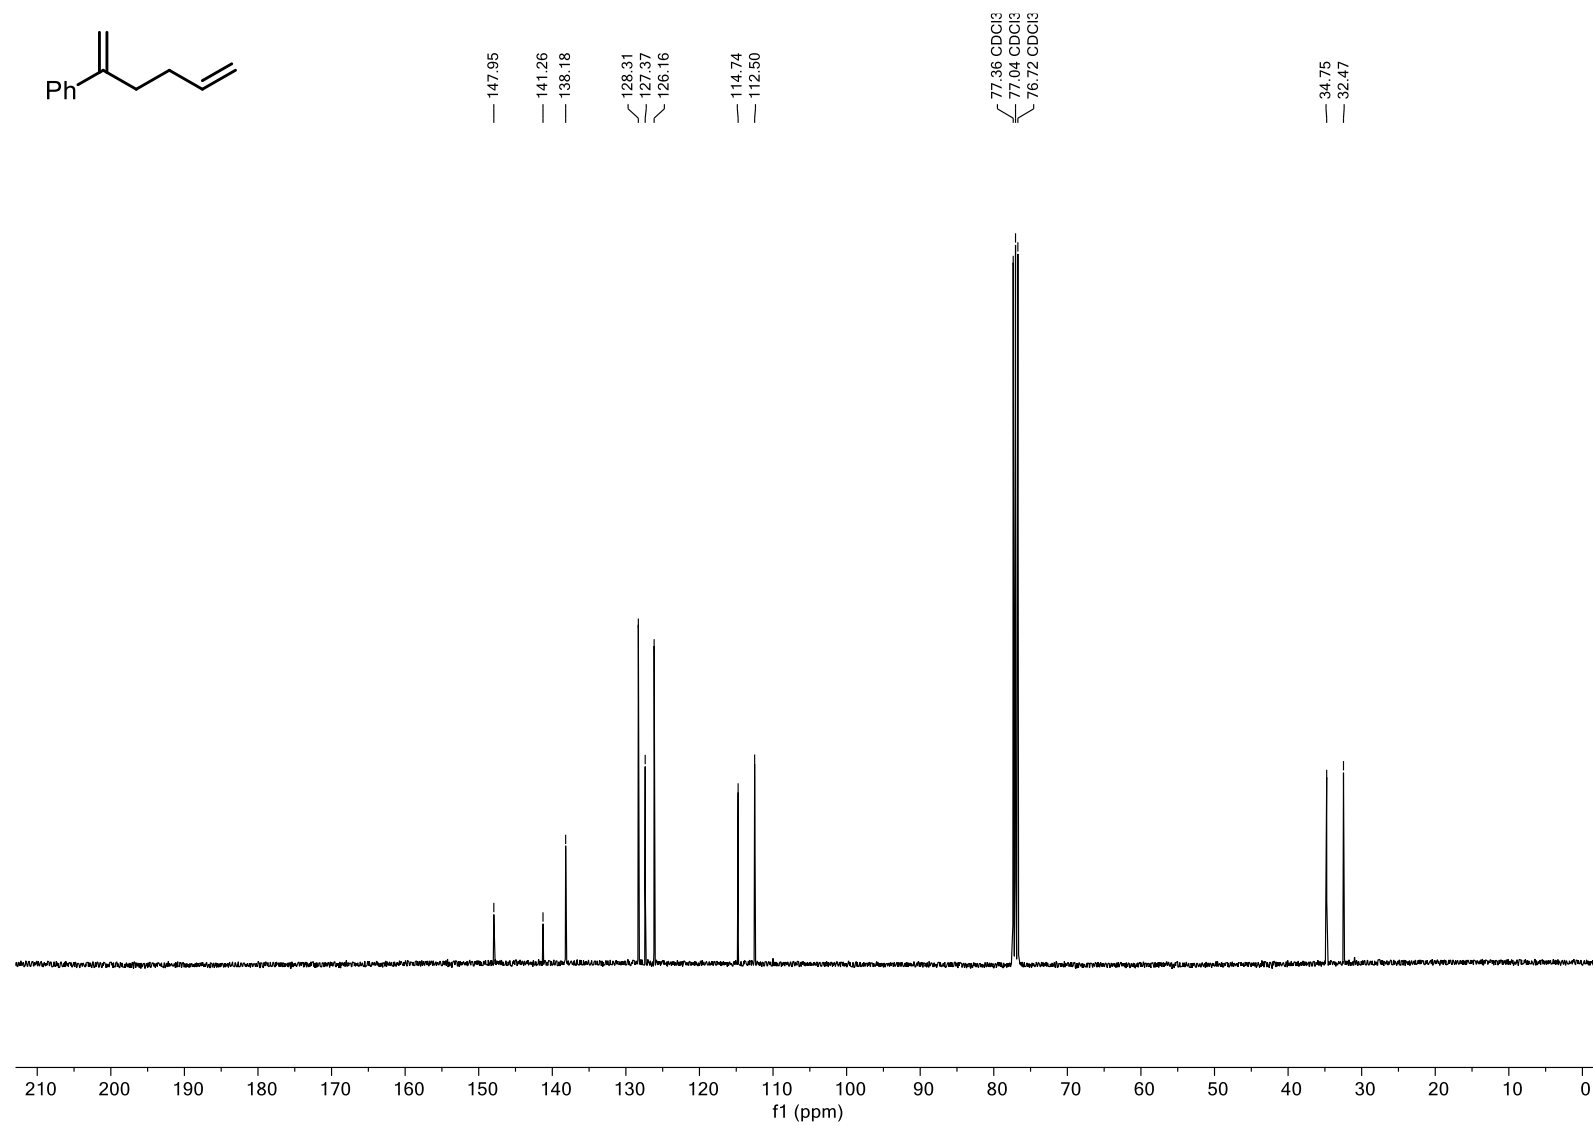

**2-Bromo-1-(4-(trifluoromethyl)phenyl)ethan-1-one (S3):**  $^1\text{H}$  NMR (300 MHz,  $\text{CDCl}_3$ )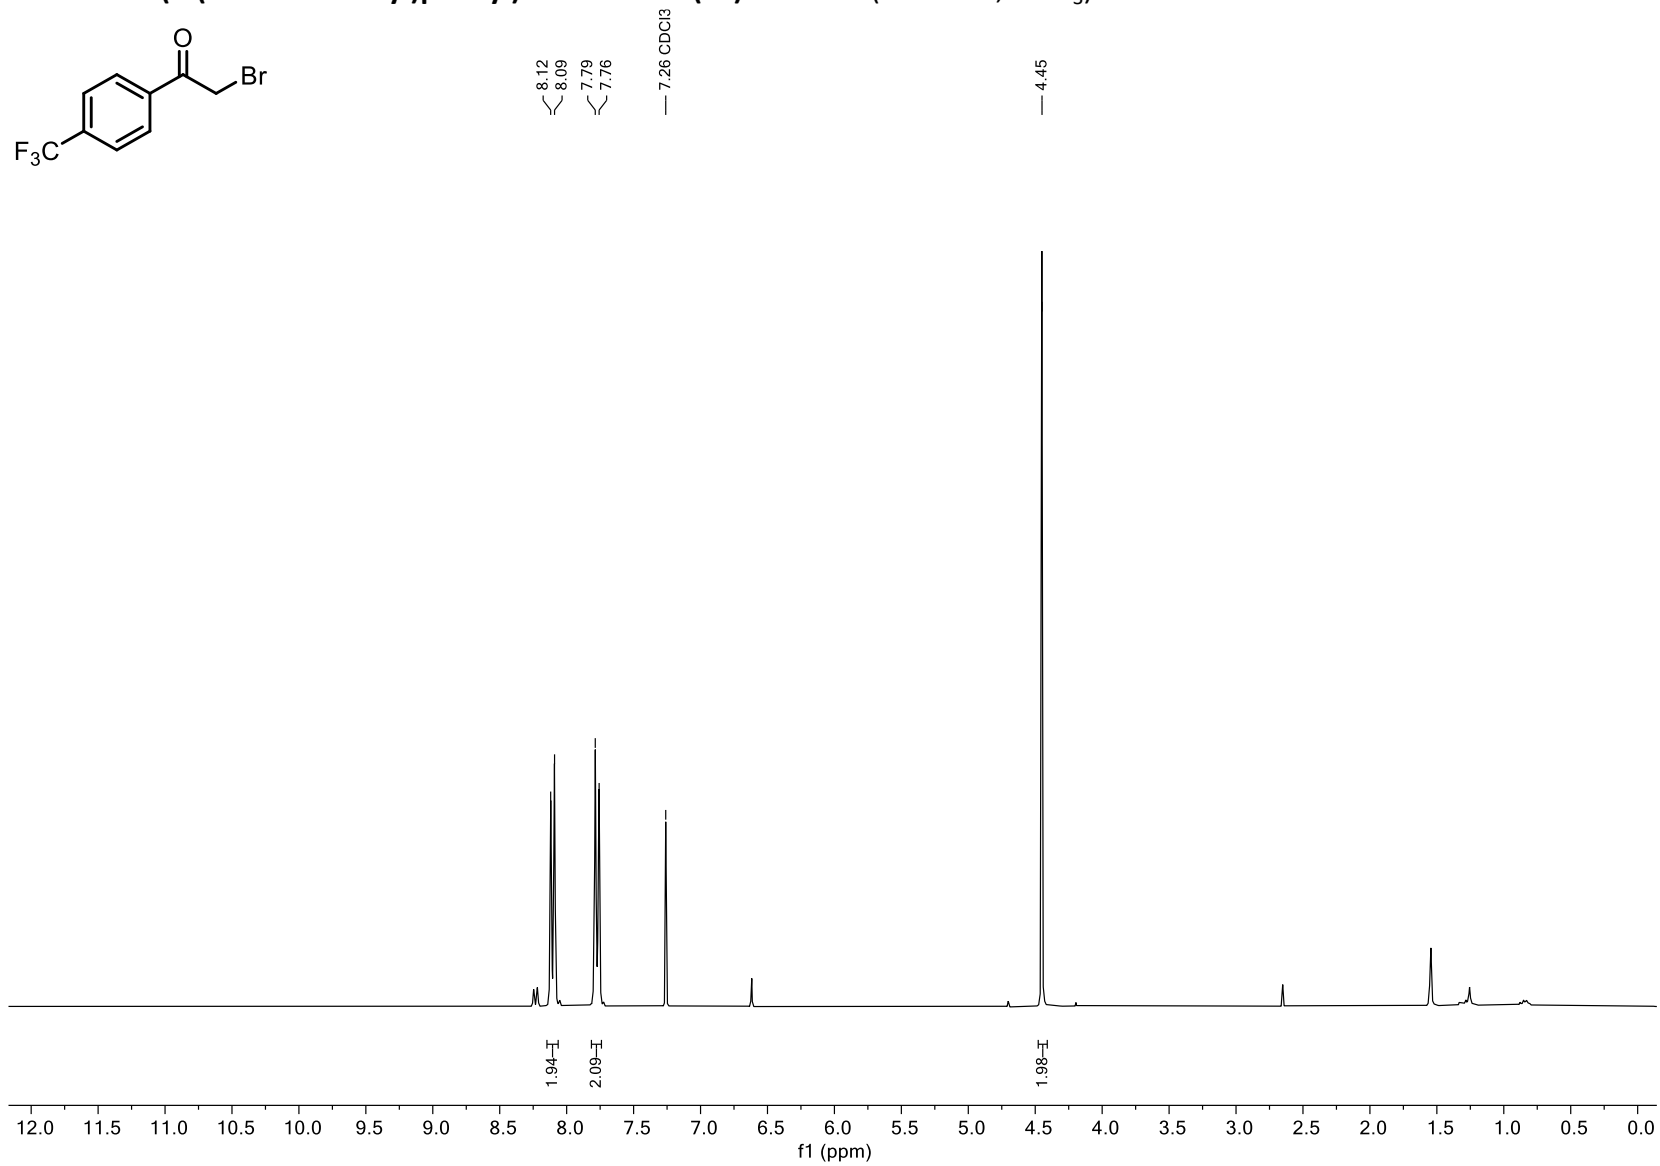

**2-Bromo-1-(4-(trifluoromethyl)phenyl)ethan-1-one (S3):**  $^{13}\text{C}\{^1\text{H}\}$  NMR (101 MHz,  $\text{CDCl}_3$ )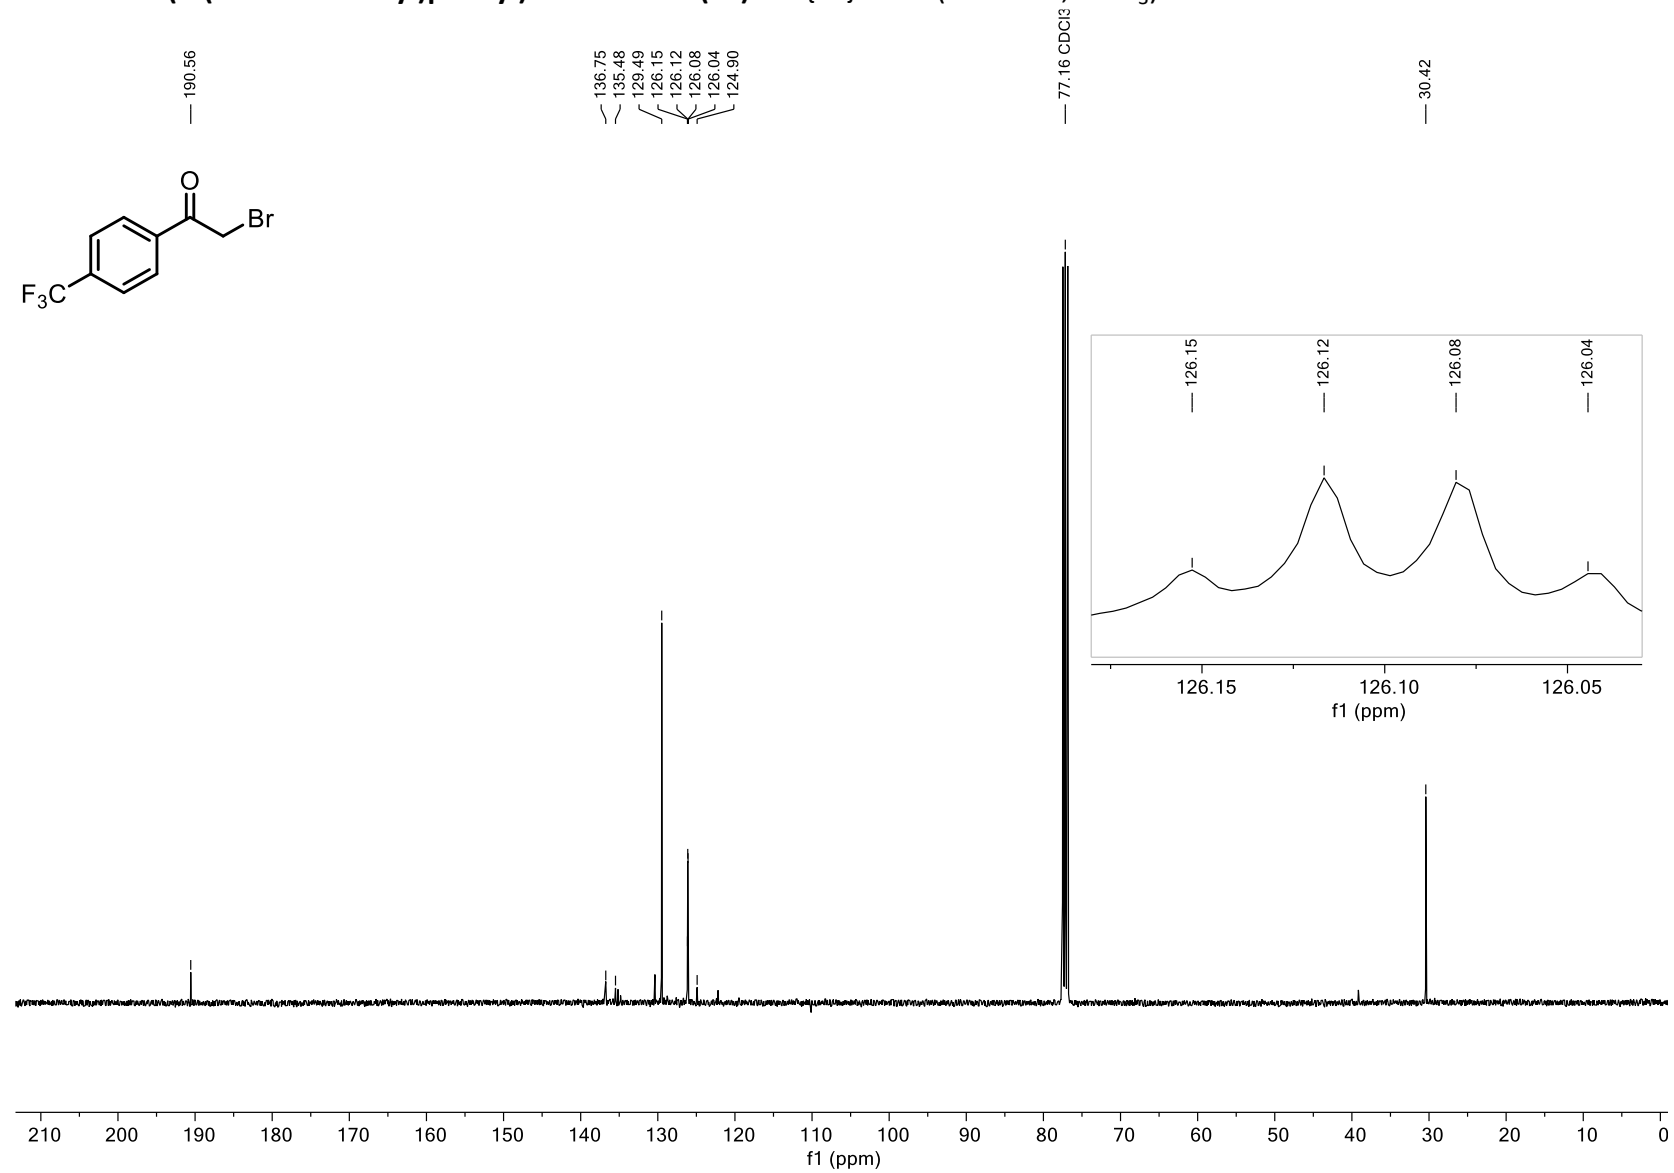

**2-Bromo-1-(4-(trifluoromethyl)phenyl)ethan-1-one (S3):**  $^{19}\text{F}\{^1\text{H}\}$  NMR (282 MHz,  $\text{CDCl}_3$ )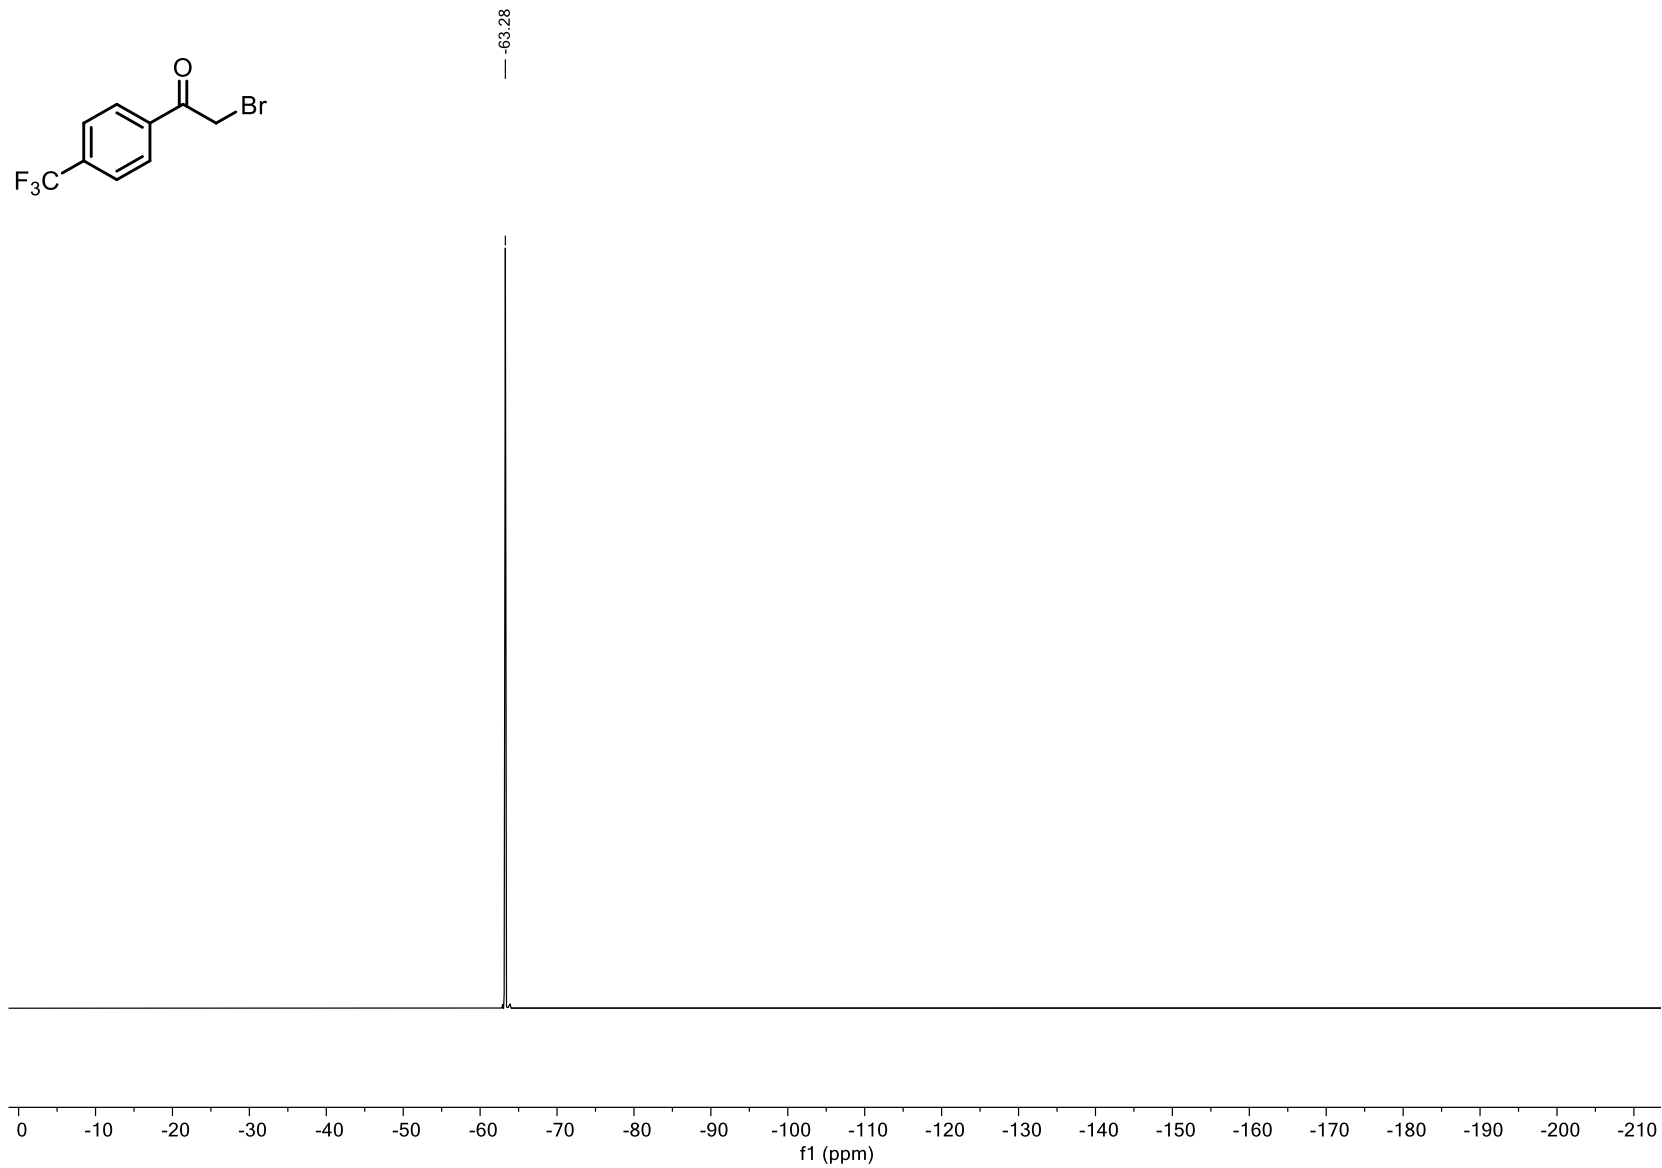

**1,4-Bis(4-(trifluoromethyl)phenyl)butane-1,4-dione (S4):**  $^1\text{H}$  NMR (300 MHz,  $\text{CDCl}_3$ )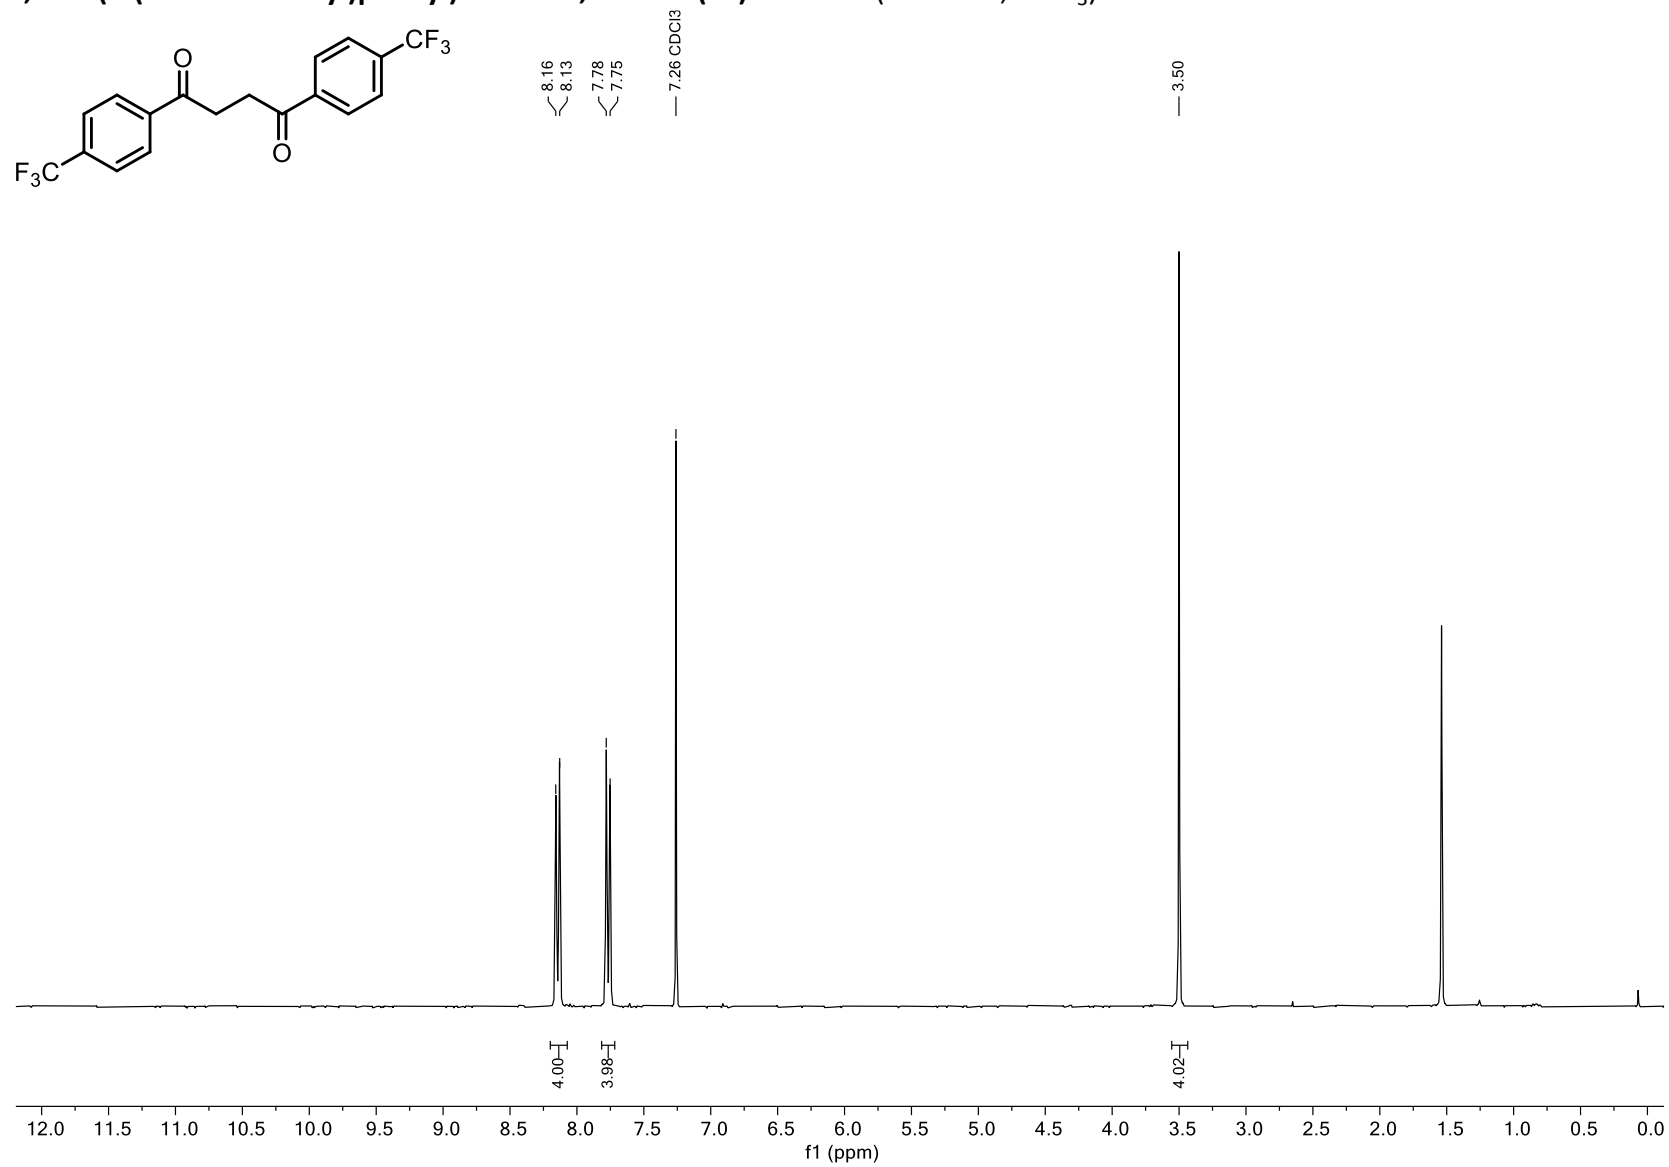

**1,4-Bis(4-(trifluoromethyl)phenyl)butane-1,4-dione (S4):**  $^{13}\text{C}\{^1\text{H}\}$  NMR (101 MHz,  $\text{CDCl}_3$ )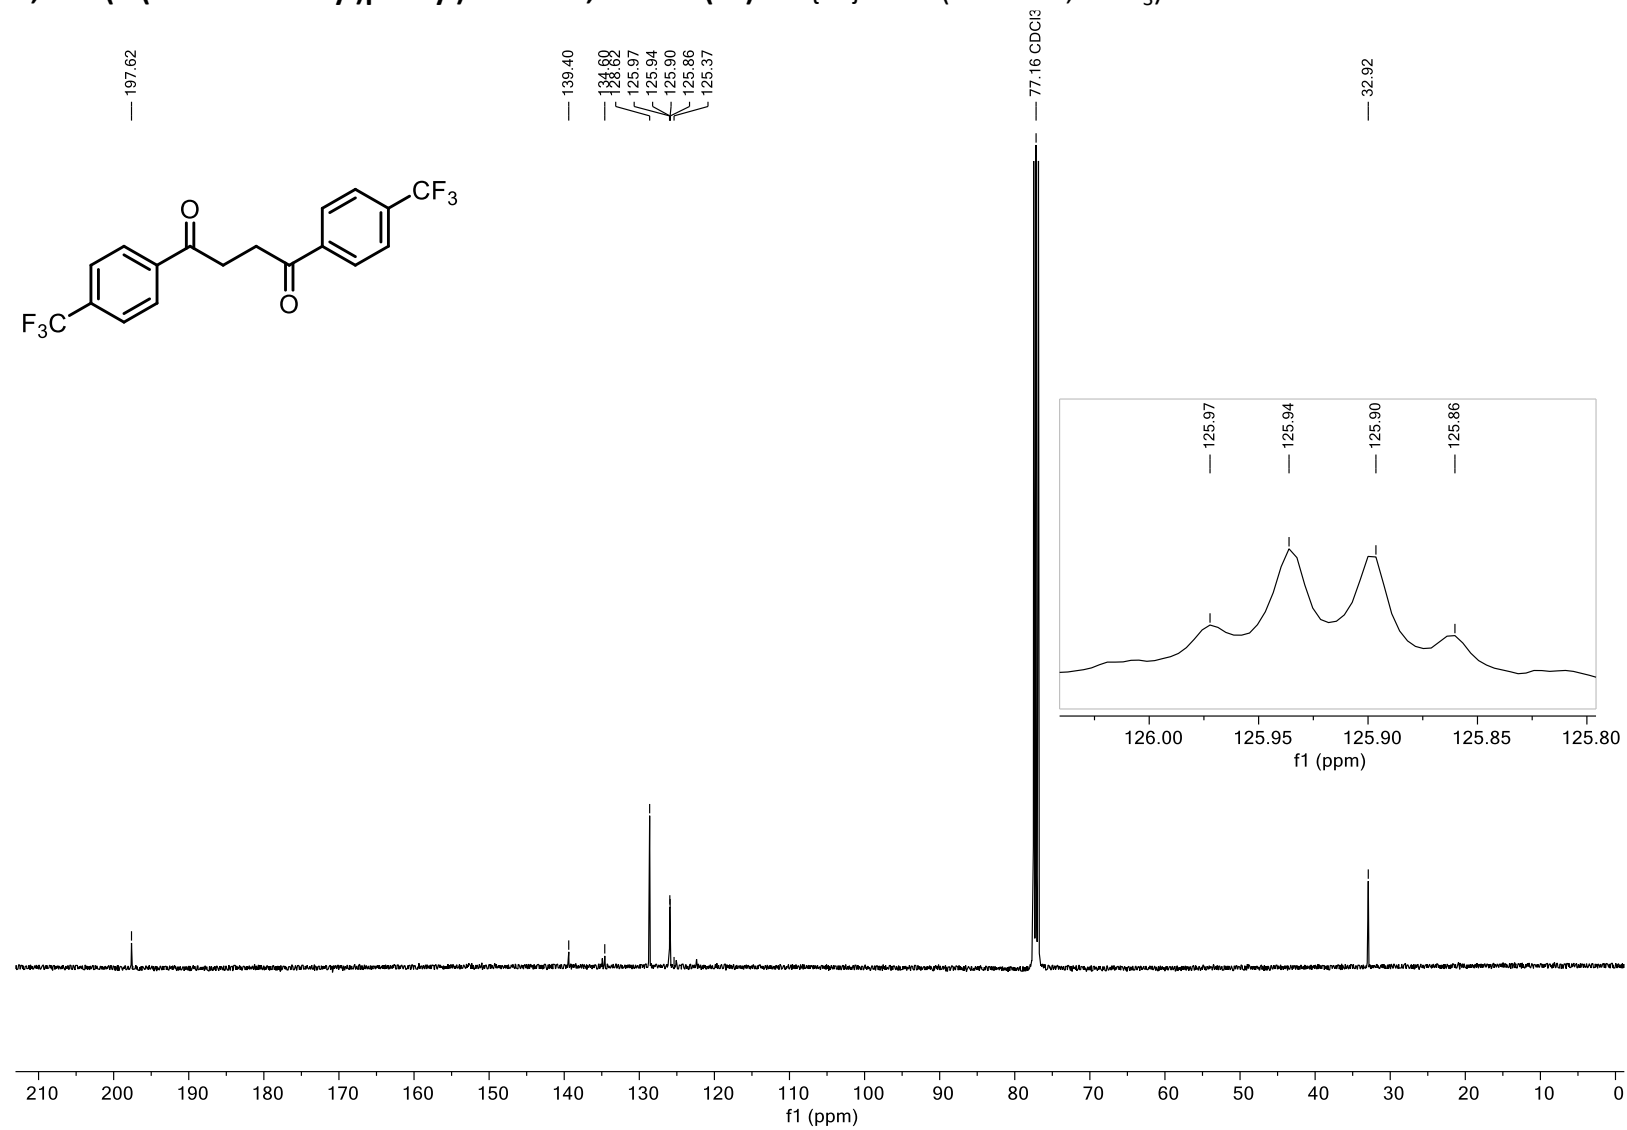

**1,4-Bis(4-(trifluoromethyl)phenyl)butane-1,4-dione (S4):**  $^{19}\text{F}\{^1\text{H}\}$  NMR (282 MHz,  $\text{CDCl}_3$ )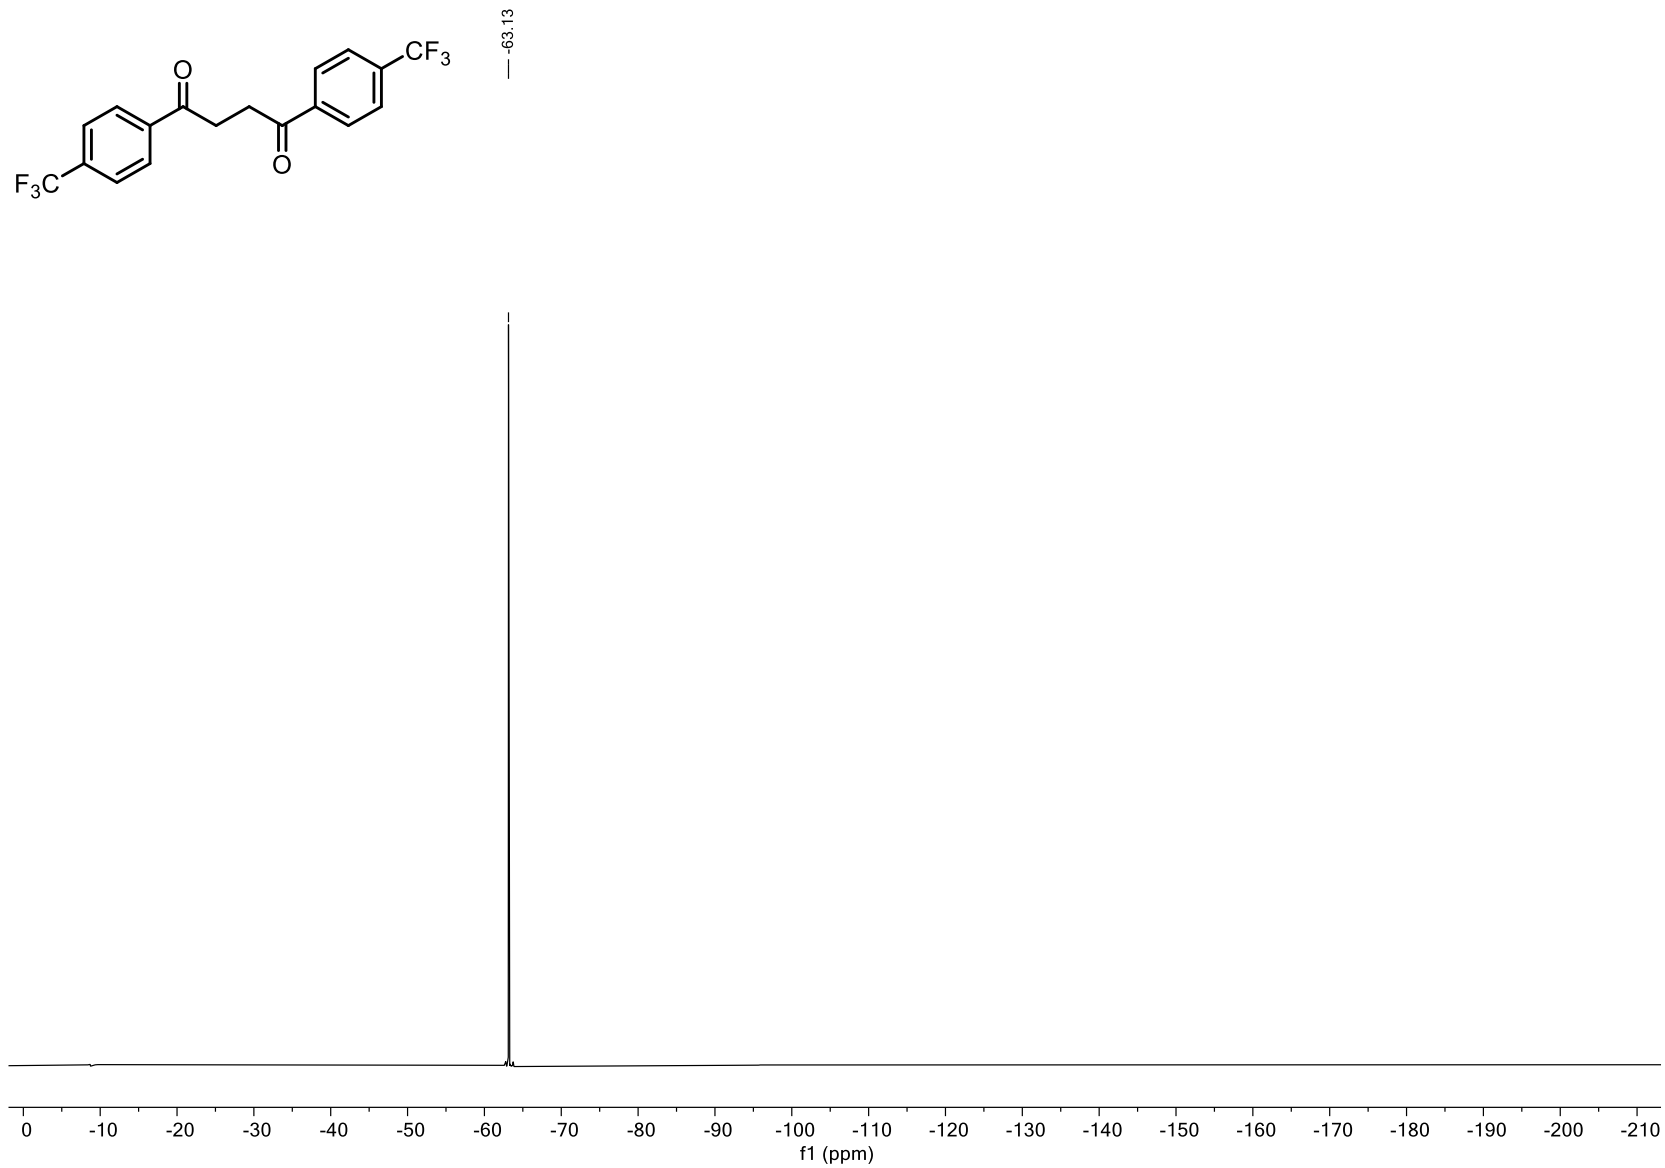

**4,4'-(Hexa-1,5-diene-2,5-diyl)bis((trifluoromethyl)benzene) (1c):  $^1\text{H}$  NMR (300 MHz,  $\text{CDCl}_3$ )**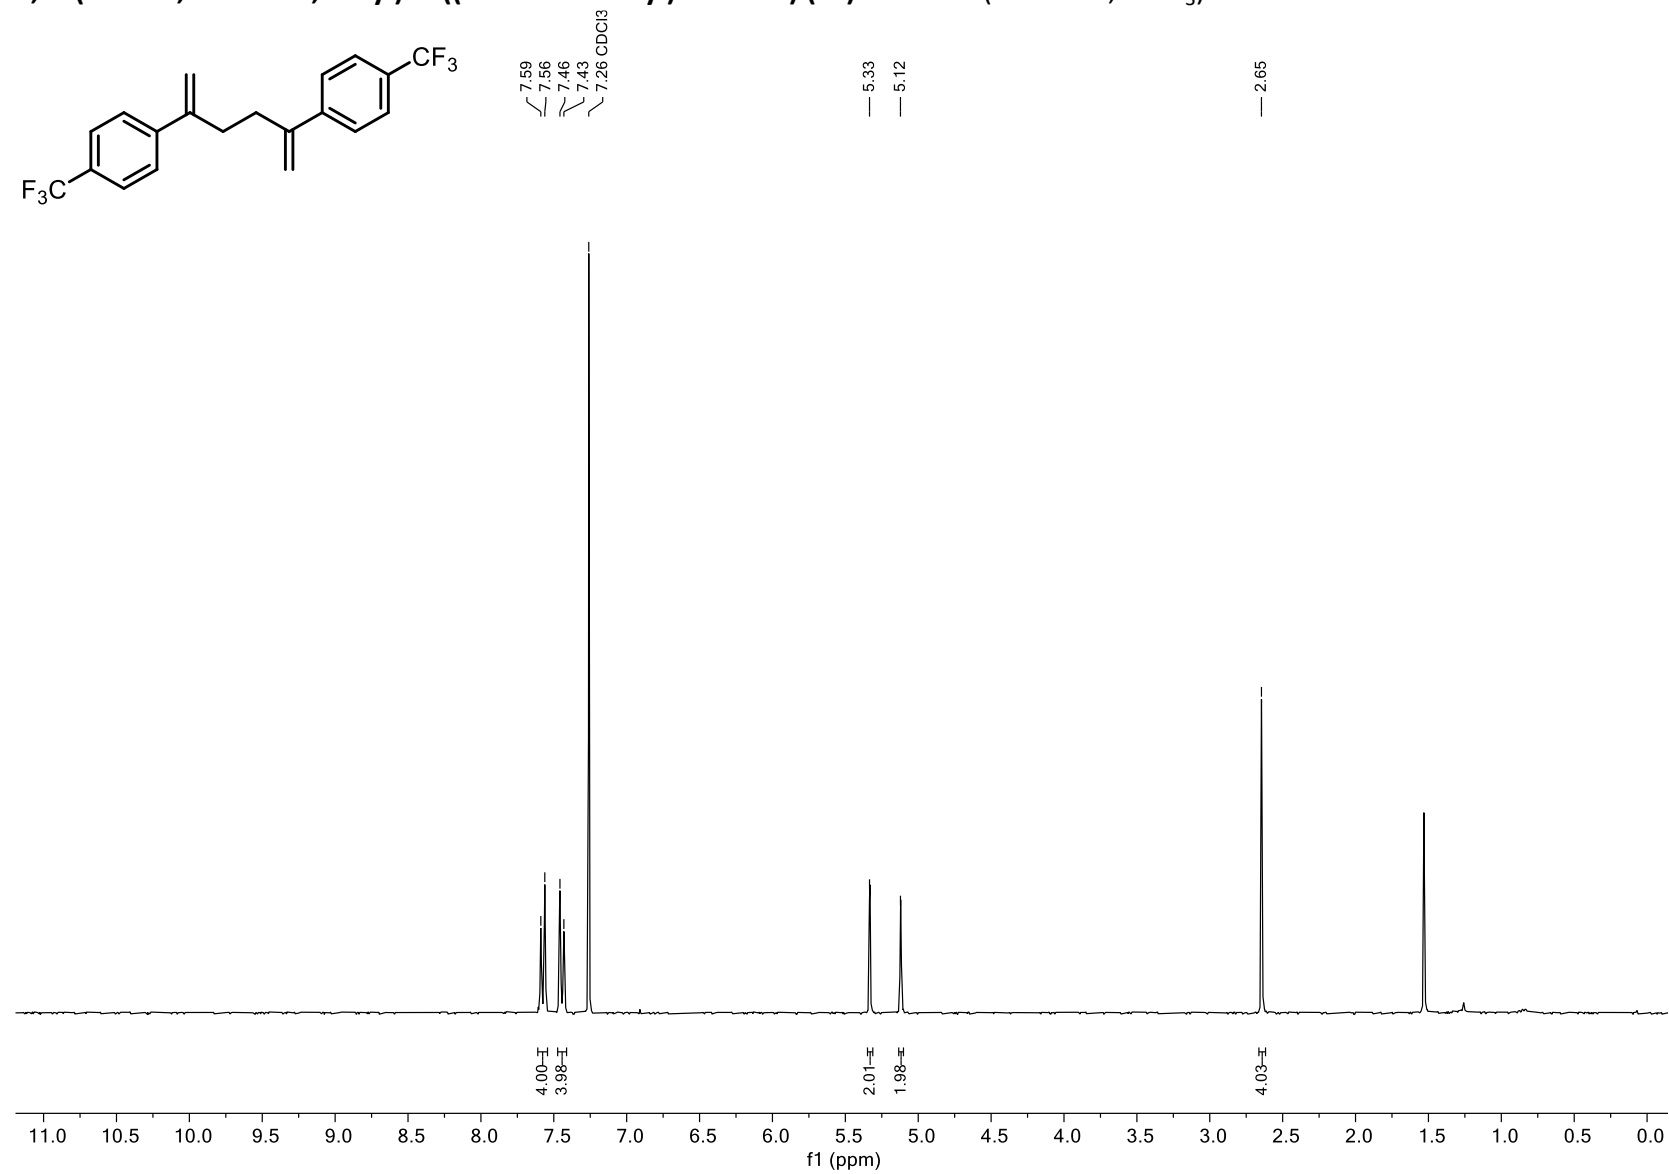



**4,4'-(Hexa-1,5-diene-2,5-diyl)bis((trifluoromethyl)benzene) (1c):  $^{13}\text{C}\{^1\text{H}\}$  NMR (101 MHz,  $\text{CDCl}_3$ )**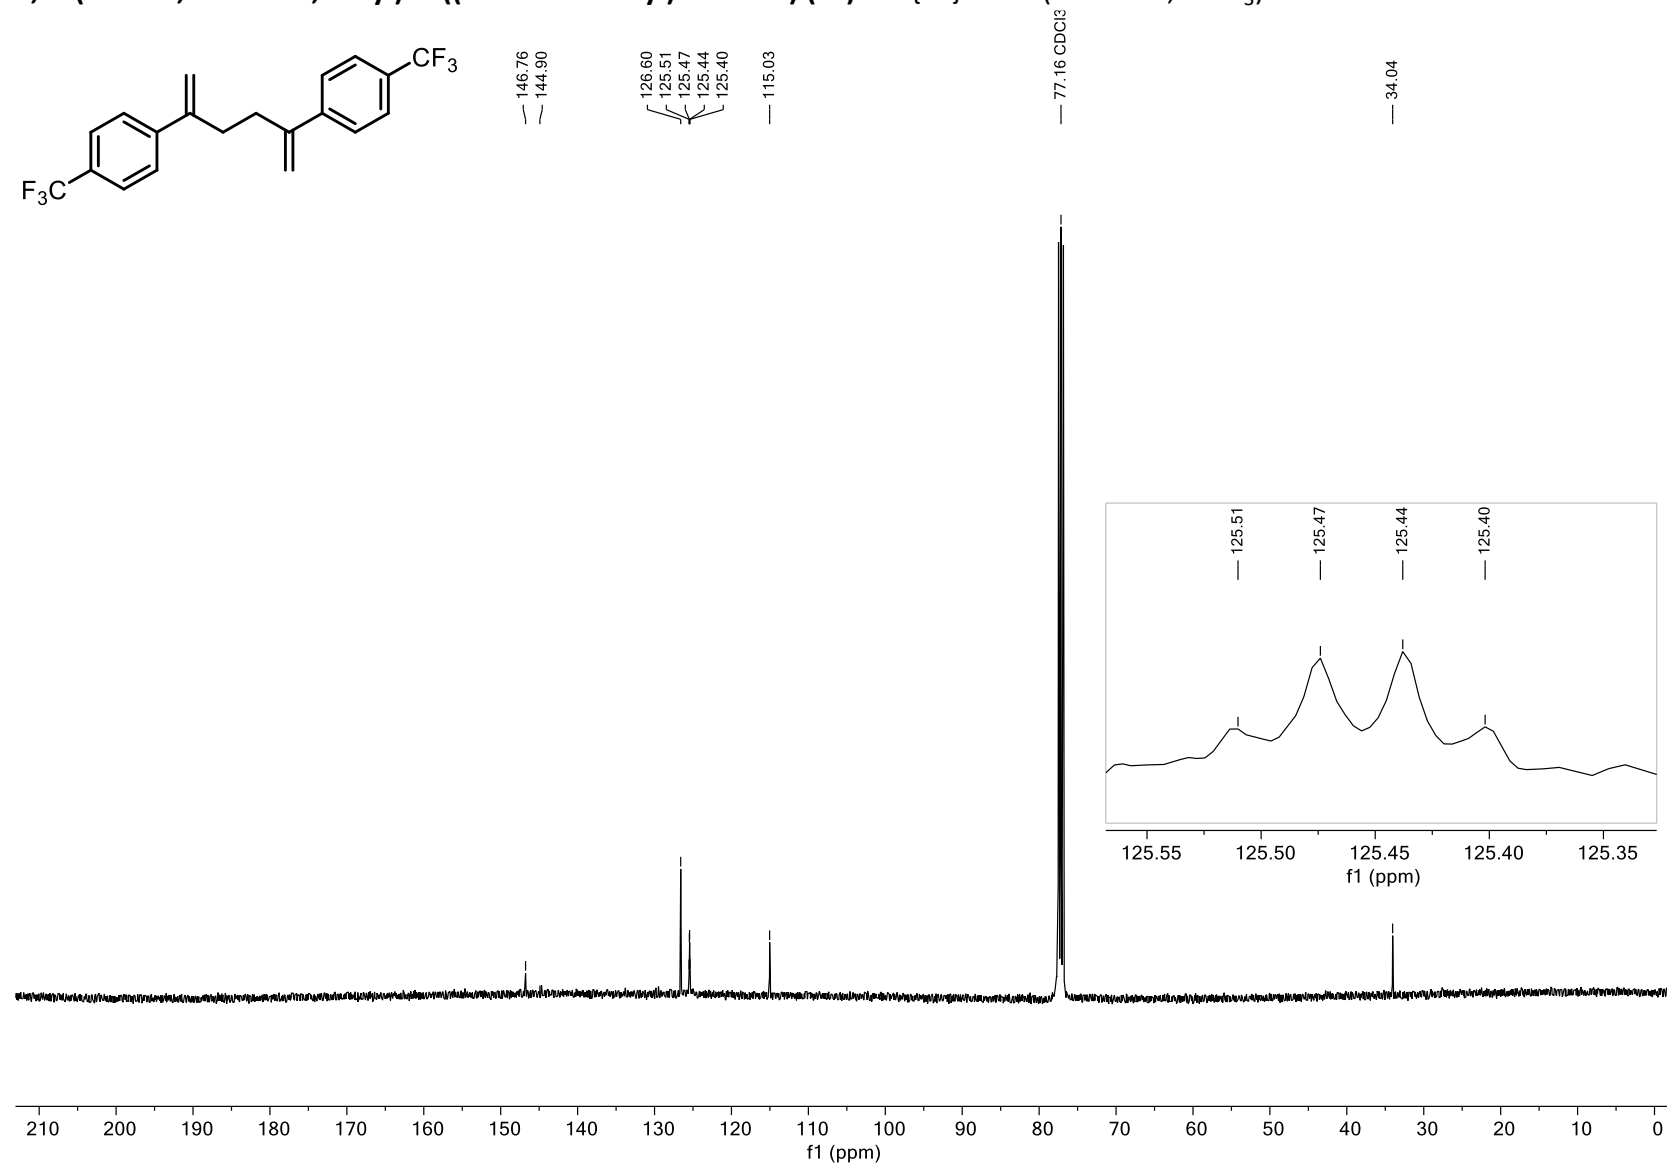

**4,4'-(Hexa-1,5-diene-2,5-diyl)bis((trifluoromethyl)benzene) (1c):**  $^{19}\text{F}\{^1\text{H}\}$  NMR (282 MHz,  $\text{CDCl}_3$ )

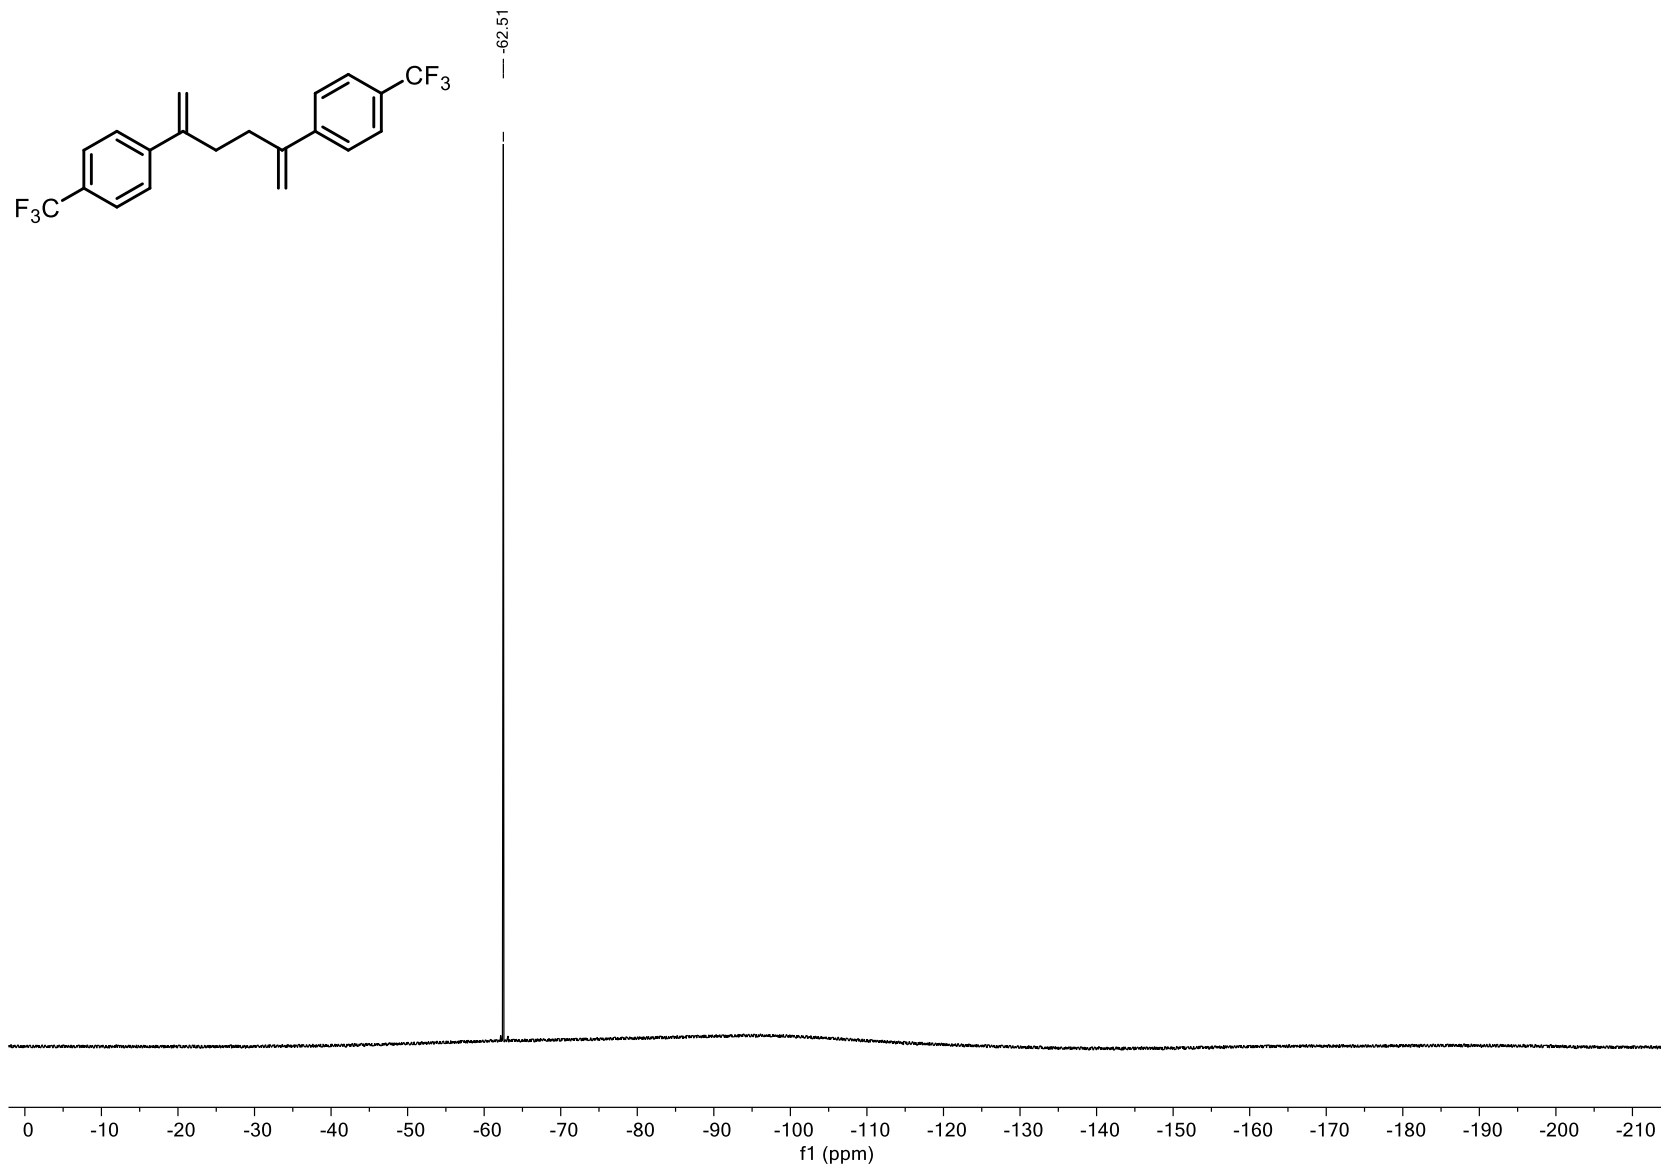

4,4'-(Hexa-1,5-diene-2,5-diyl)dibenzaldehyde (**1d**):  $^1\text{H}$  NMR (300 MHz,  $\text{CDCl}_3$ )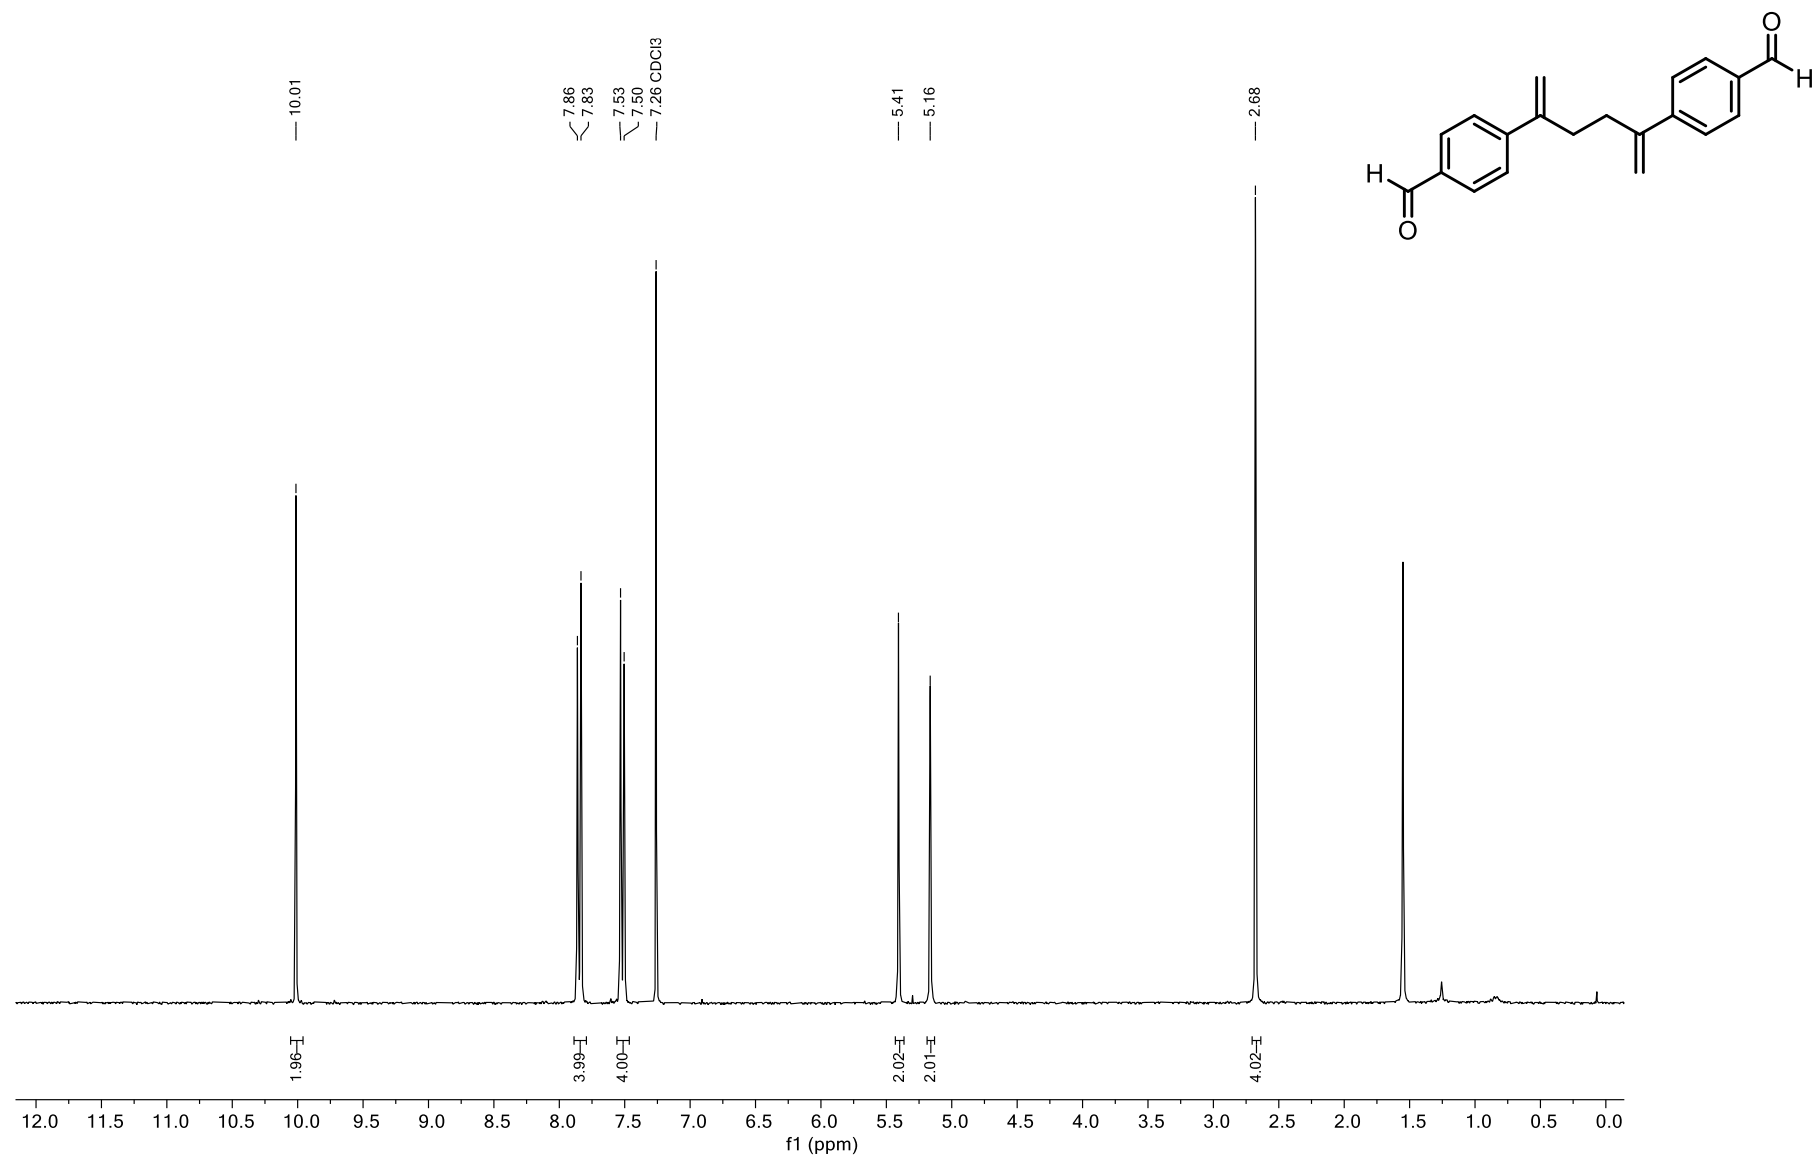

**4,4'-(Hexa-1,5-diene-2,5-diyl)dibenzaldehyde (1d):**  $^{13}\text{C}\{^1\text{H}\}$  NMR (101 MHz,  $\text{CDCl}_3$ )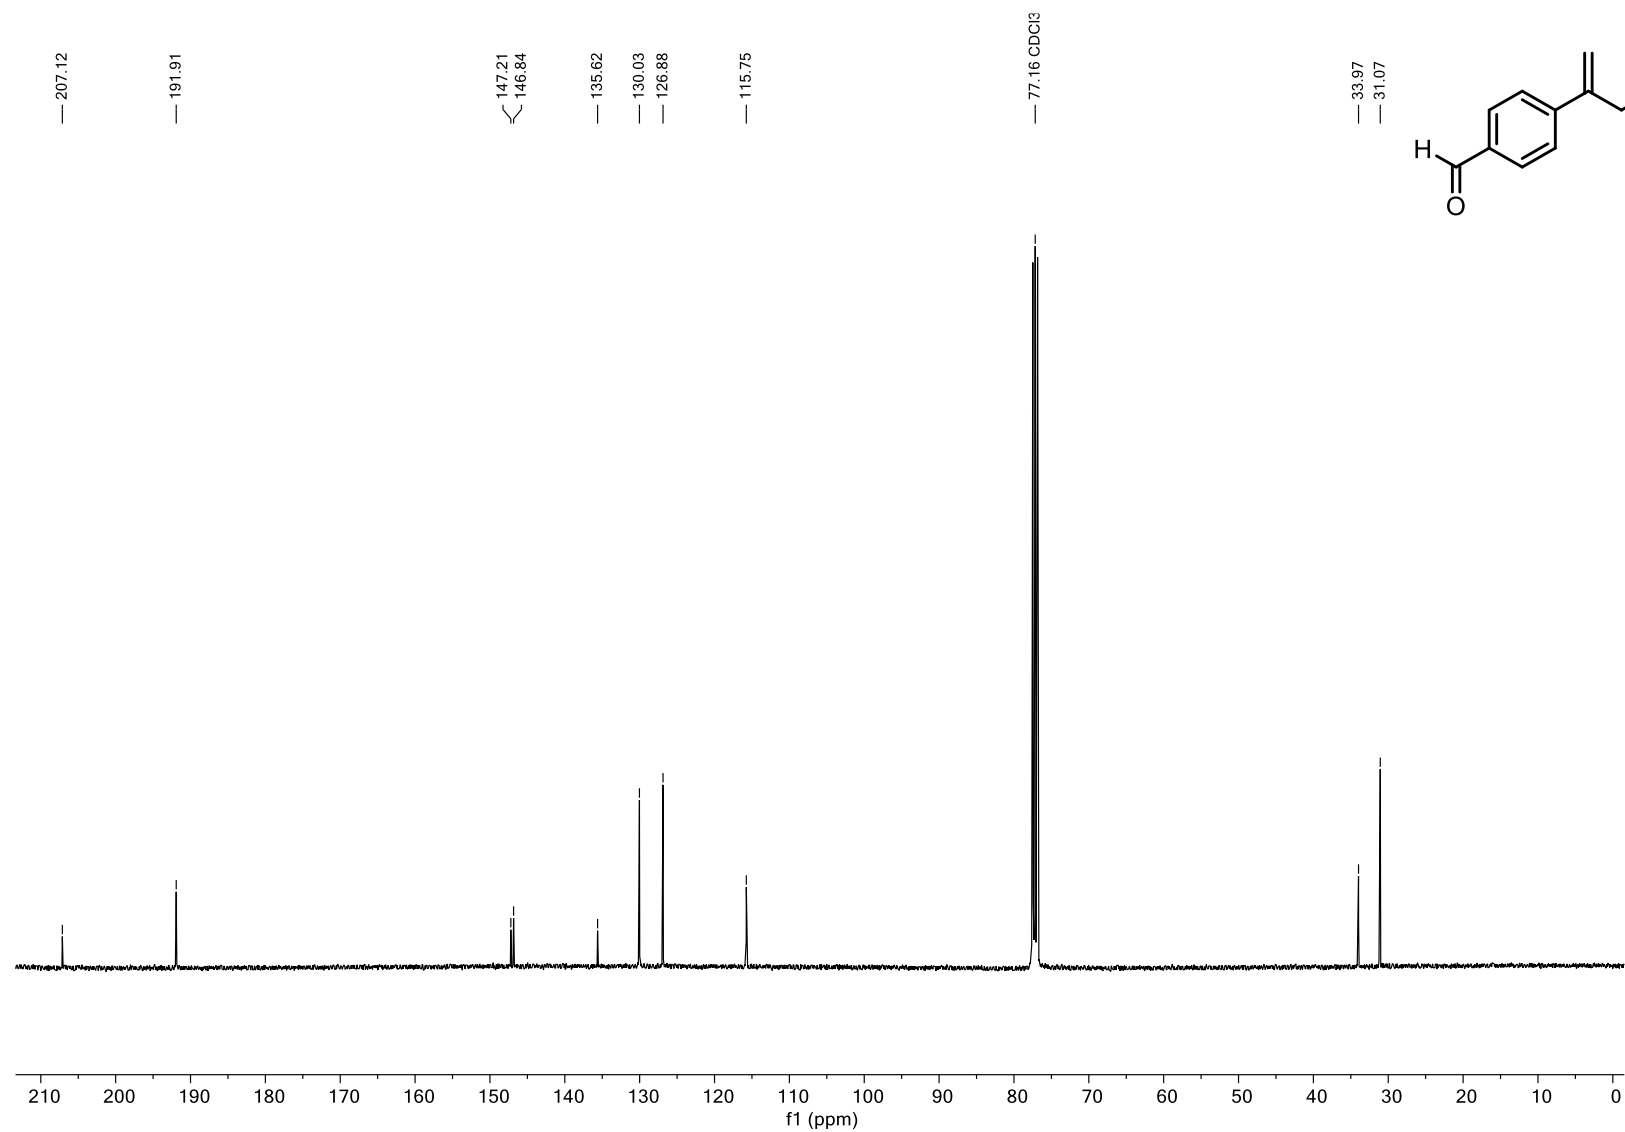

**2,2'-(Hexa-1,5-diene-2,5-diylbis(4,1-phenylene))bis(4,4,5,5-tetramethyl-1,3,2-dioxaborolane) (1e):**  $^1\text{H}$  NMR (300 MHz,  $\text{CDCl}_3$ )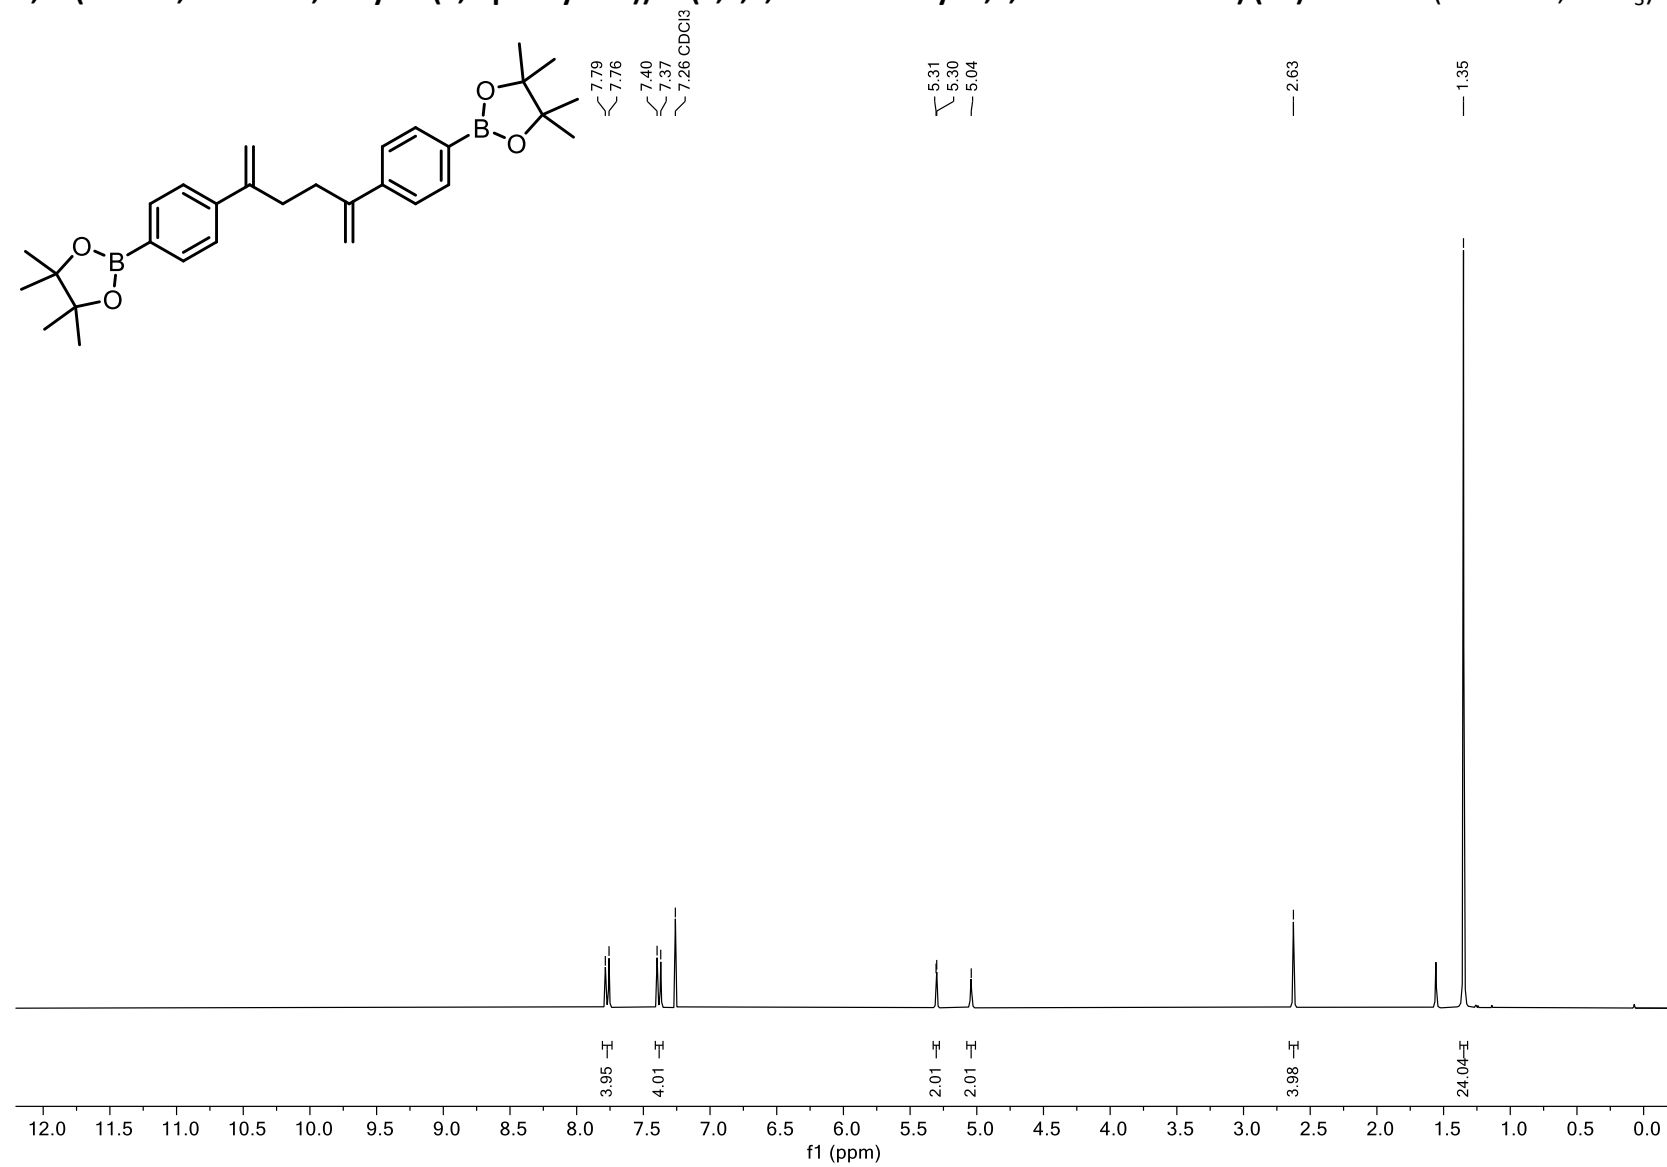

**2,2'-(Hexa-1,5-diene-2,5-diylbis(4,1-phenylene))bis(4,4,5,5-tetramethyl-1,3,2-dioxaborolane) (1e):**  $^{13}\text{C}\{^1\text{H}\}$  NMR (101 MHz,  $\text{CDCl}_3$ )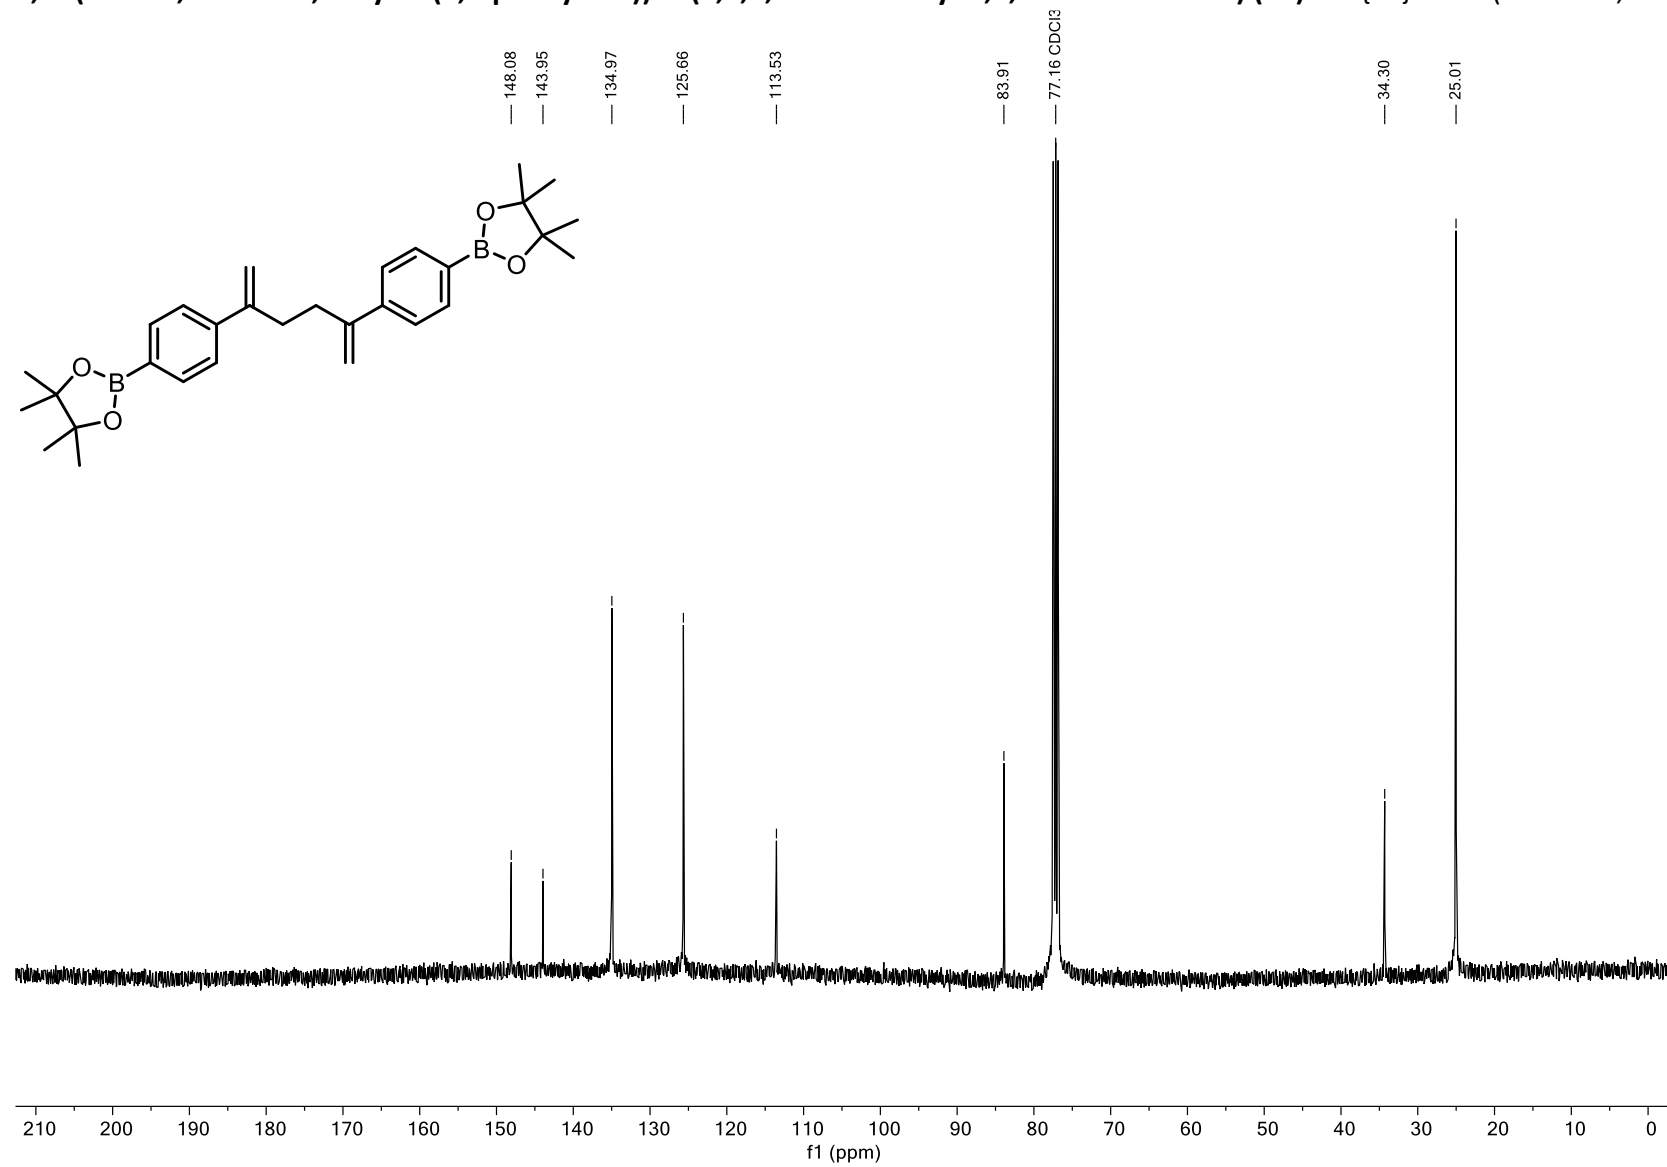

**2,2'-(Hexa-1,5-diene-2,5-diylbis(4,1-phenylene))bis(4,4,5,5-tetramethyl-1,3,2-dioxaborolane) (1e):**  $^{11}\text{B}$  NMR (161 MHz,  $\text{CDCl}_3$ )

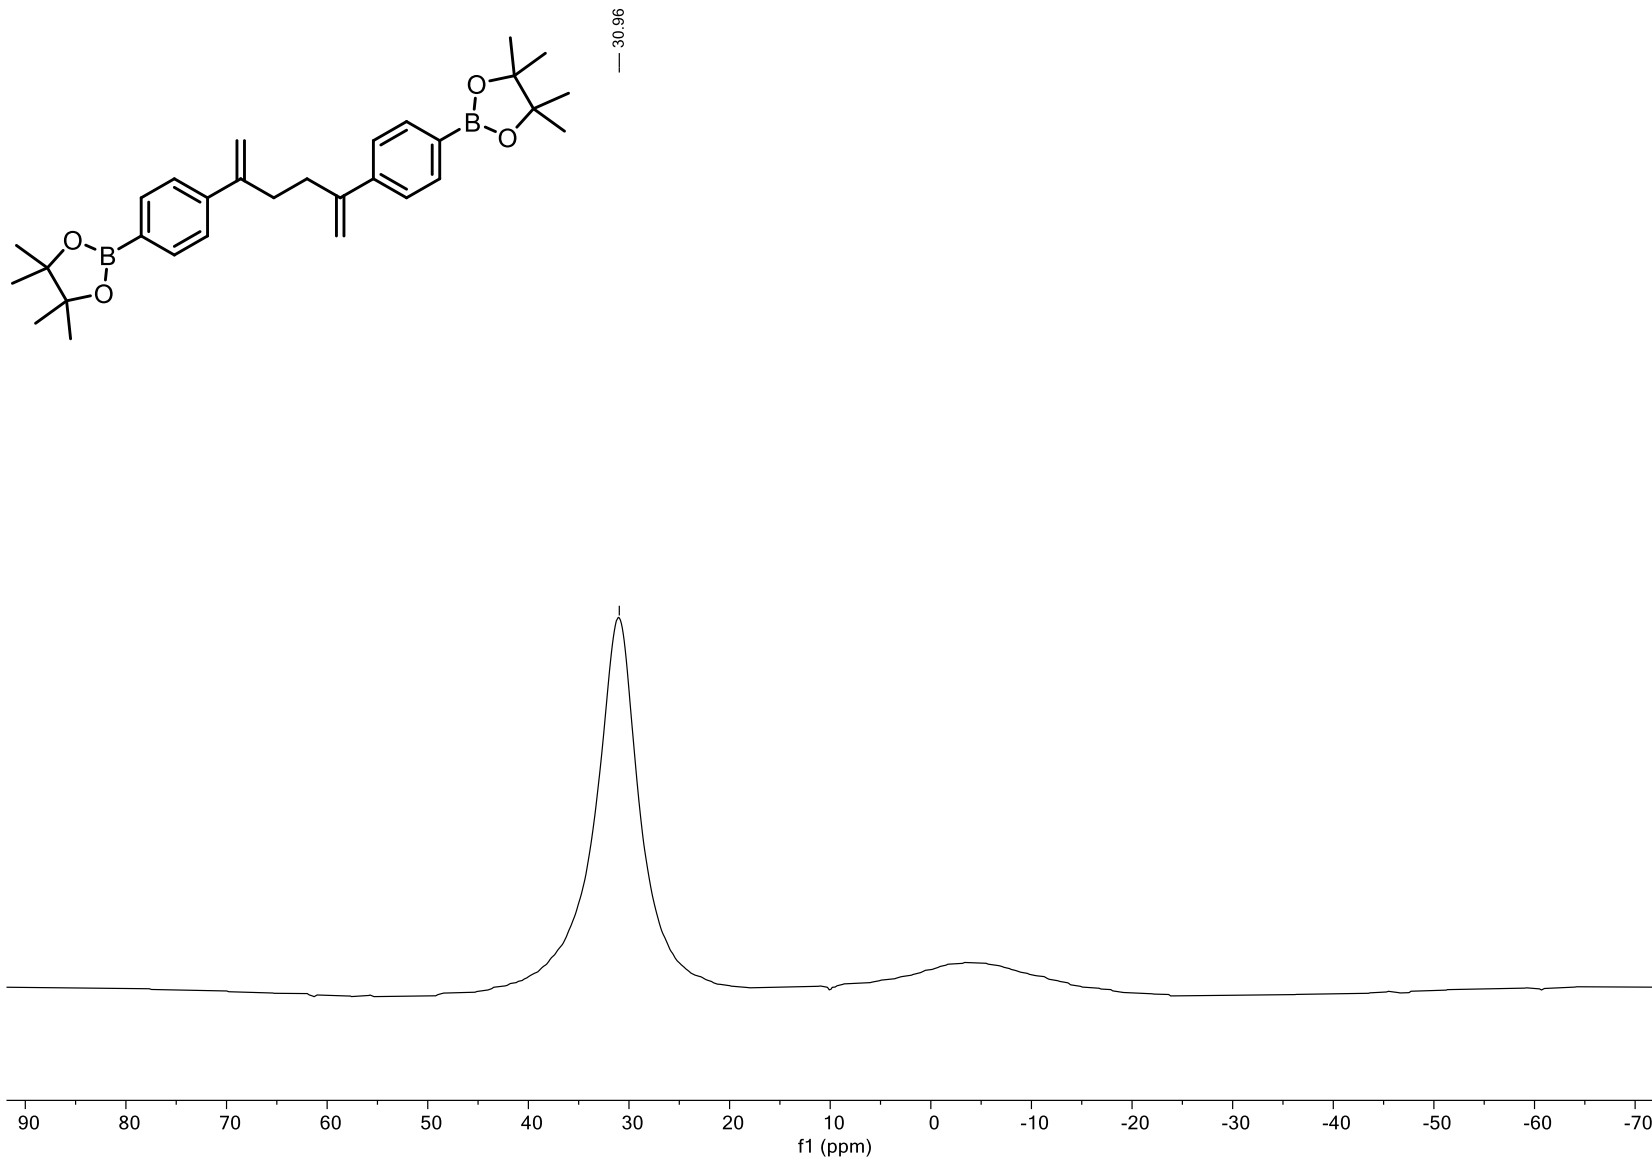

**1,4-Bis(4-bromophenyl)butane-1,4-dione (S5):**  $^1\text{H}$  NMR (300 MHz,  $\text{CDCl}_3$ )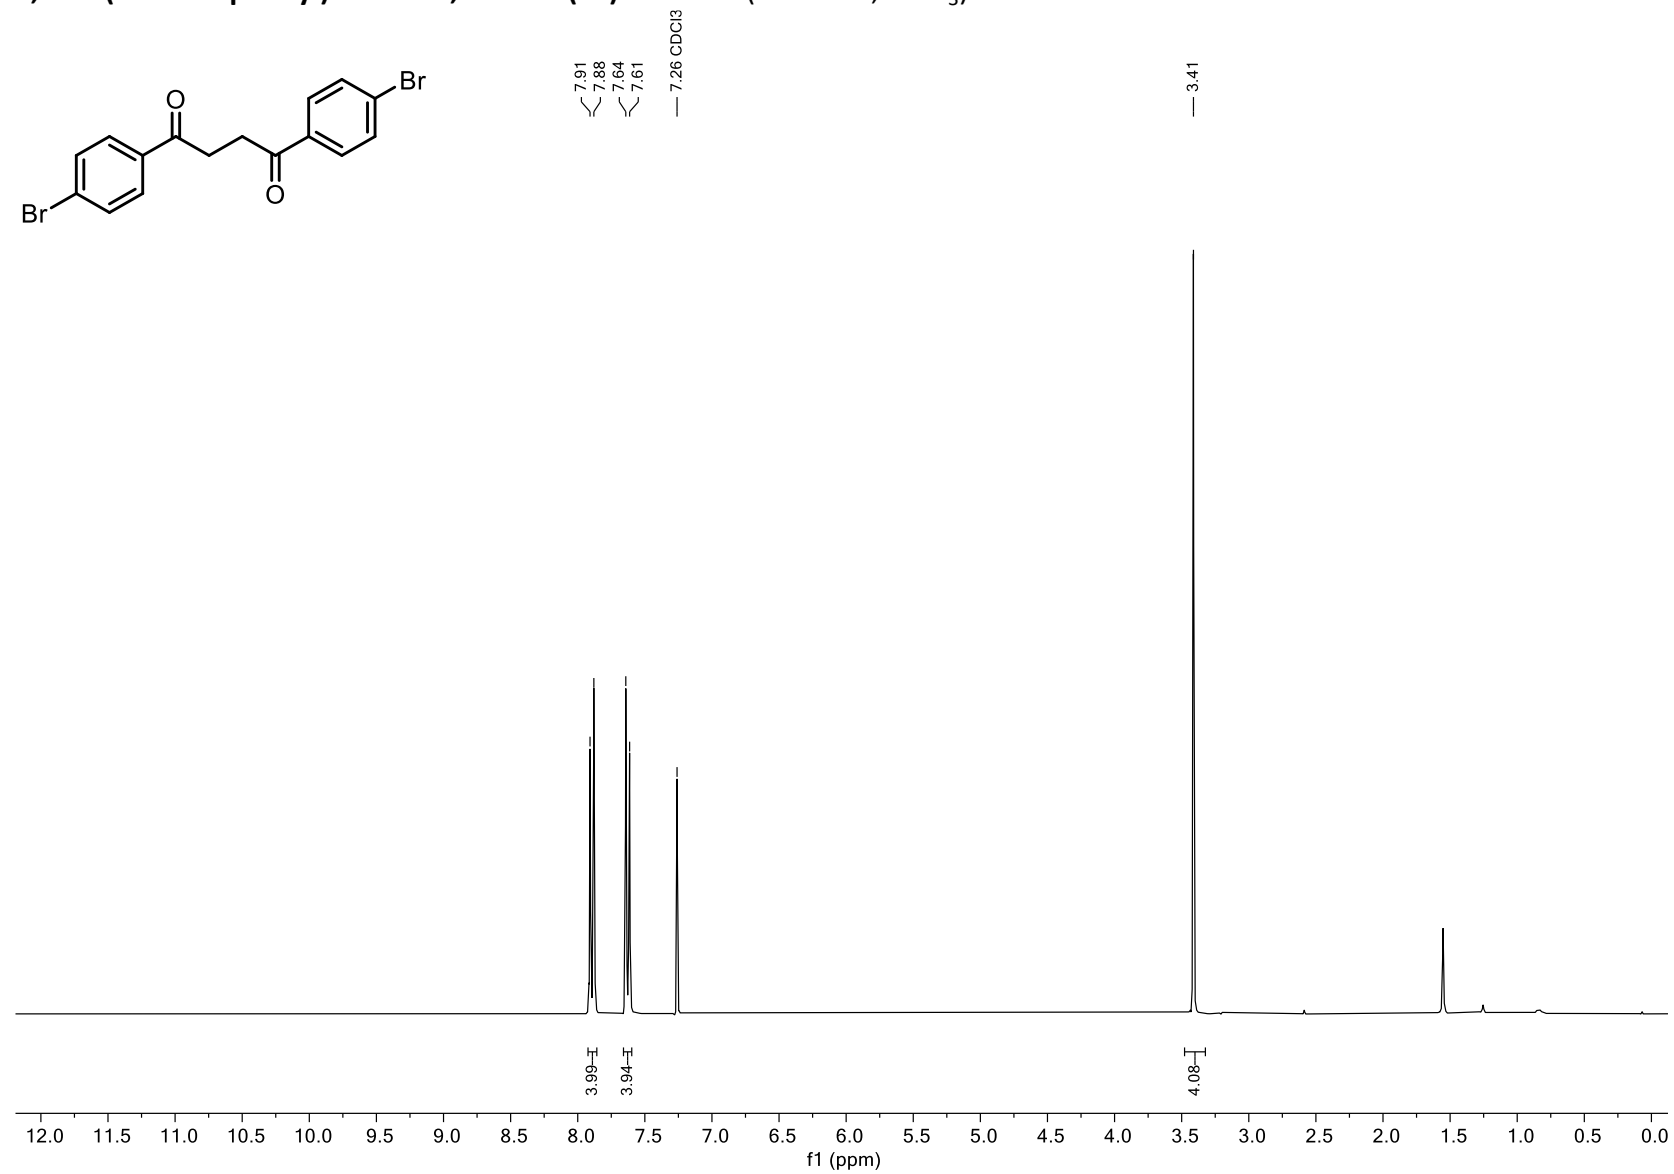



**1,4-Bis(4-bromophenyl)butane-1,4-dione (S5):**  $^{13}\text{C}\{^1\text{H}\}$  NMR (101 MHz,  $\text{CDCl}_3$ )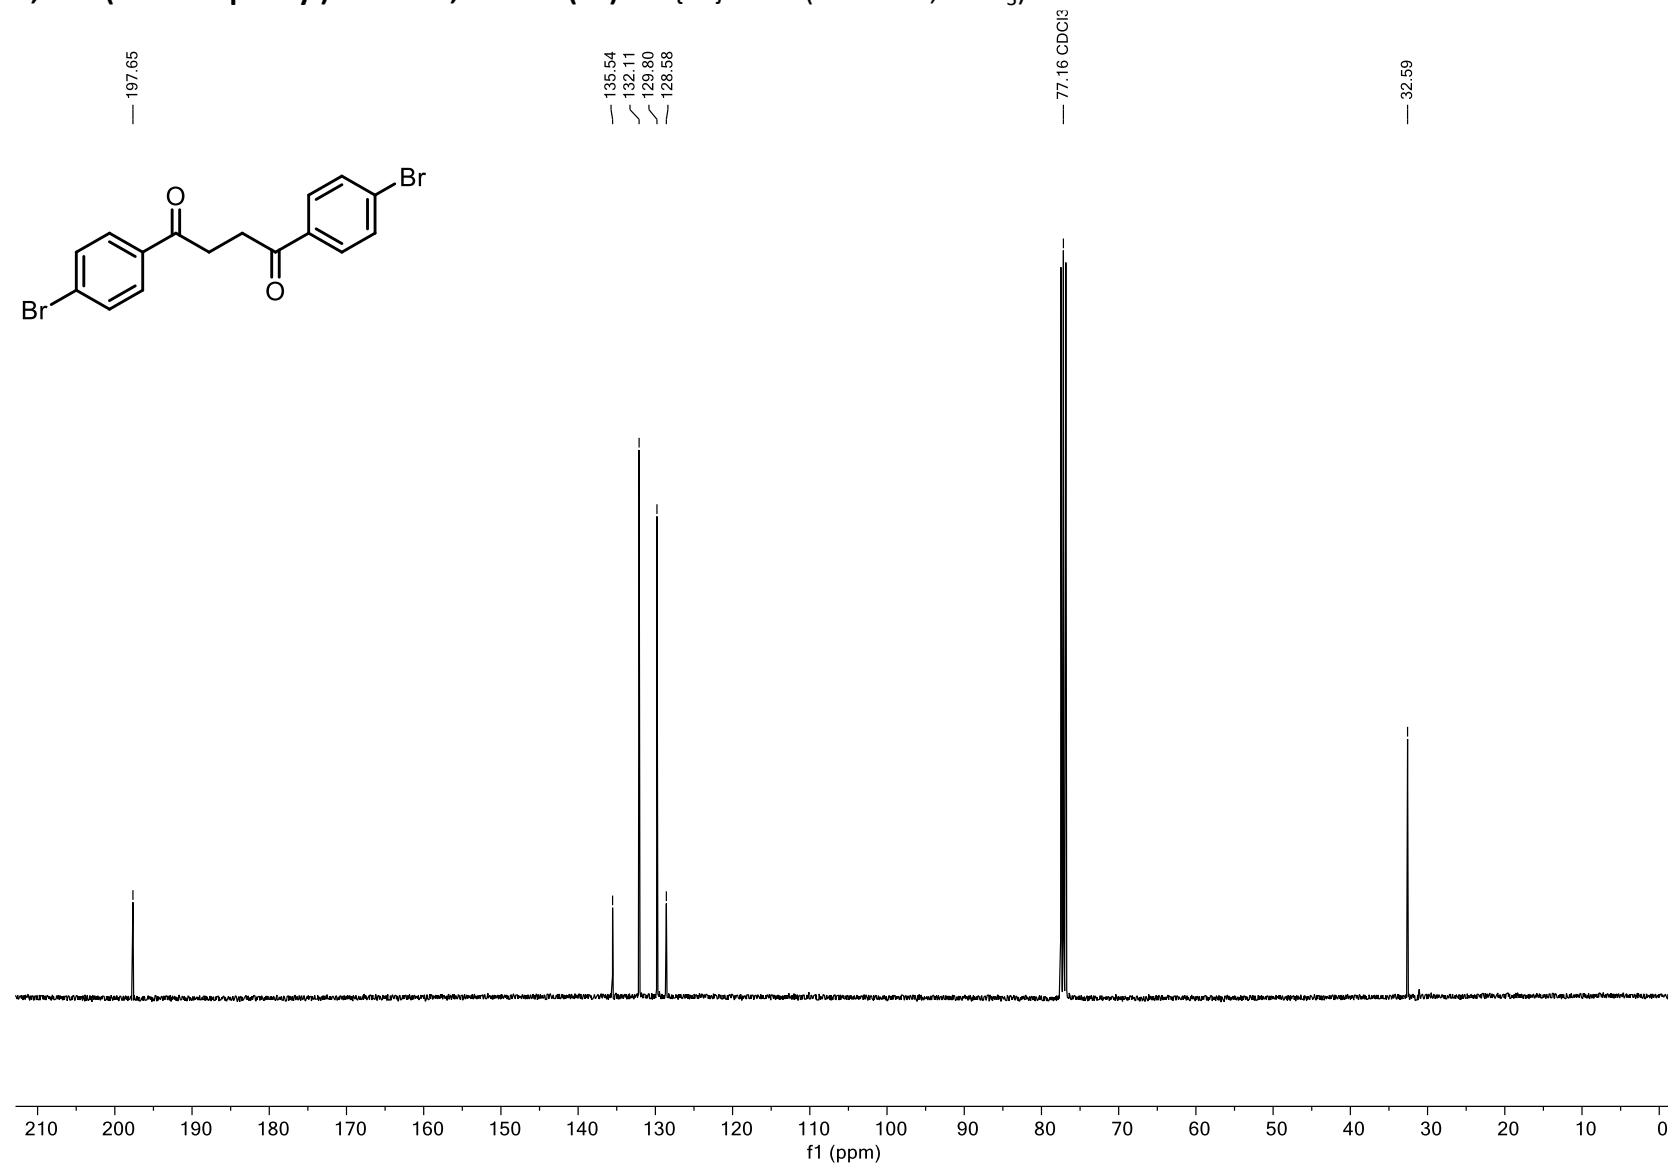

**4,4'-(Hexa-1,5-diene-2,5-diyl)bis(bromobenzene) (1f):**  $^1\text{H}$  NMR (300 MHz,  $\text{CDCl}_3$ )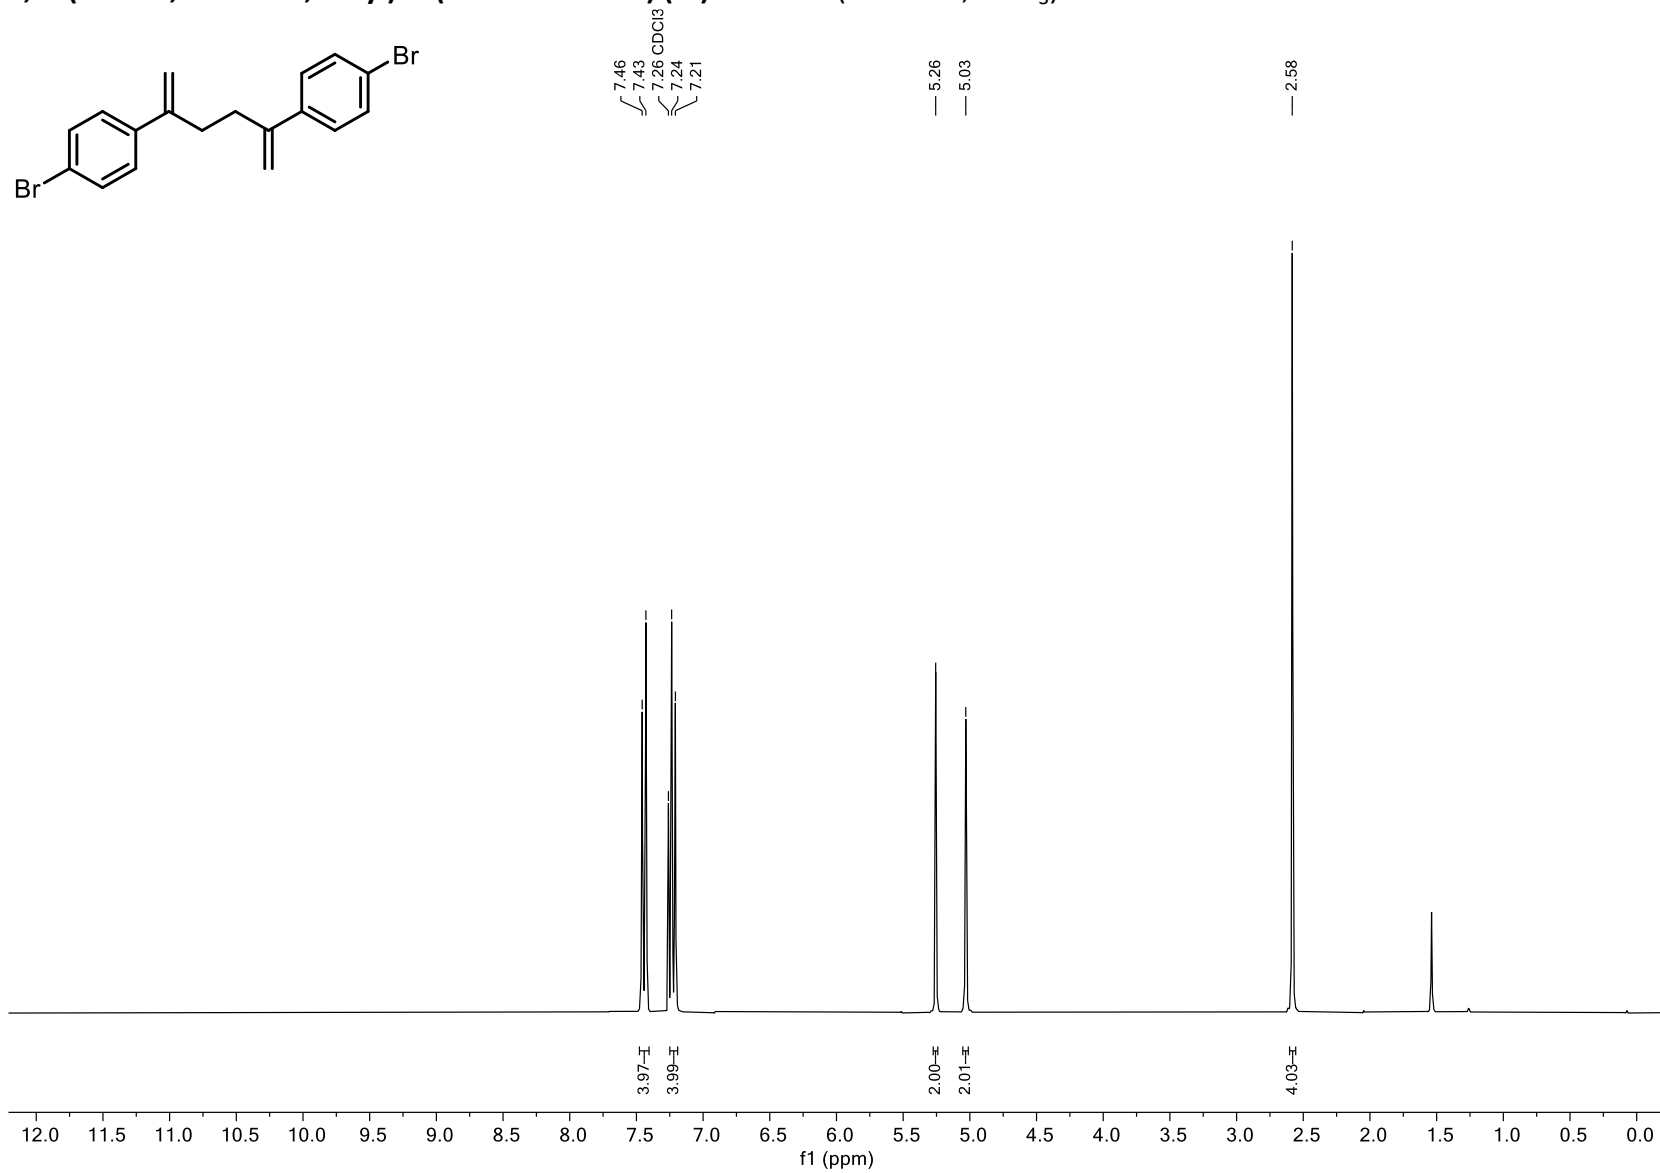

**4,4'-(Hexa-1,5-diene-2,5-diyl)bis(bromobenzene) (1f):**  $^{13}\text{C}\{^1\text{H}\}$  NMR (101 MHz,  $\text{CDCl}_3$ )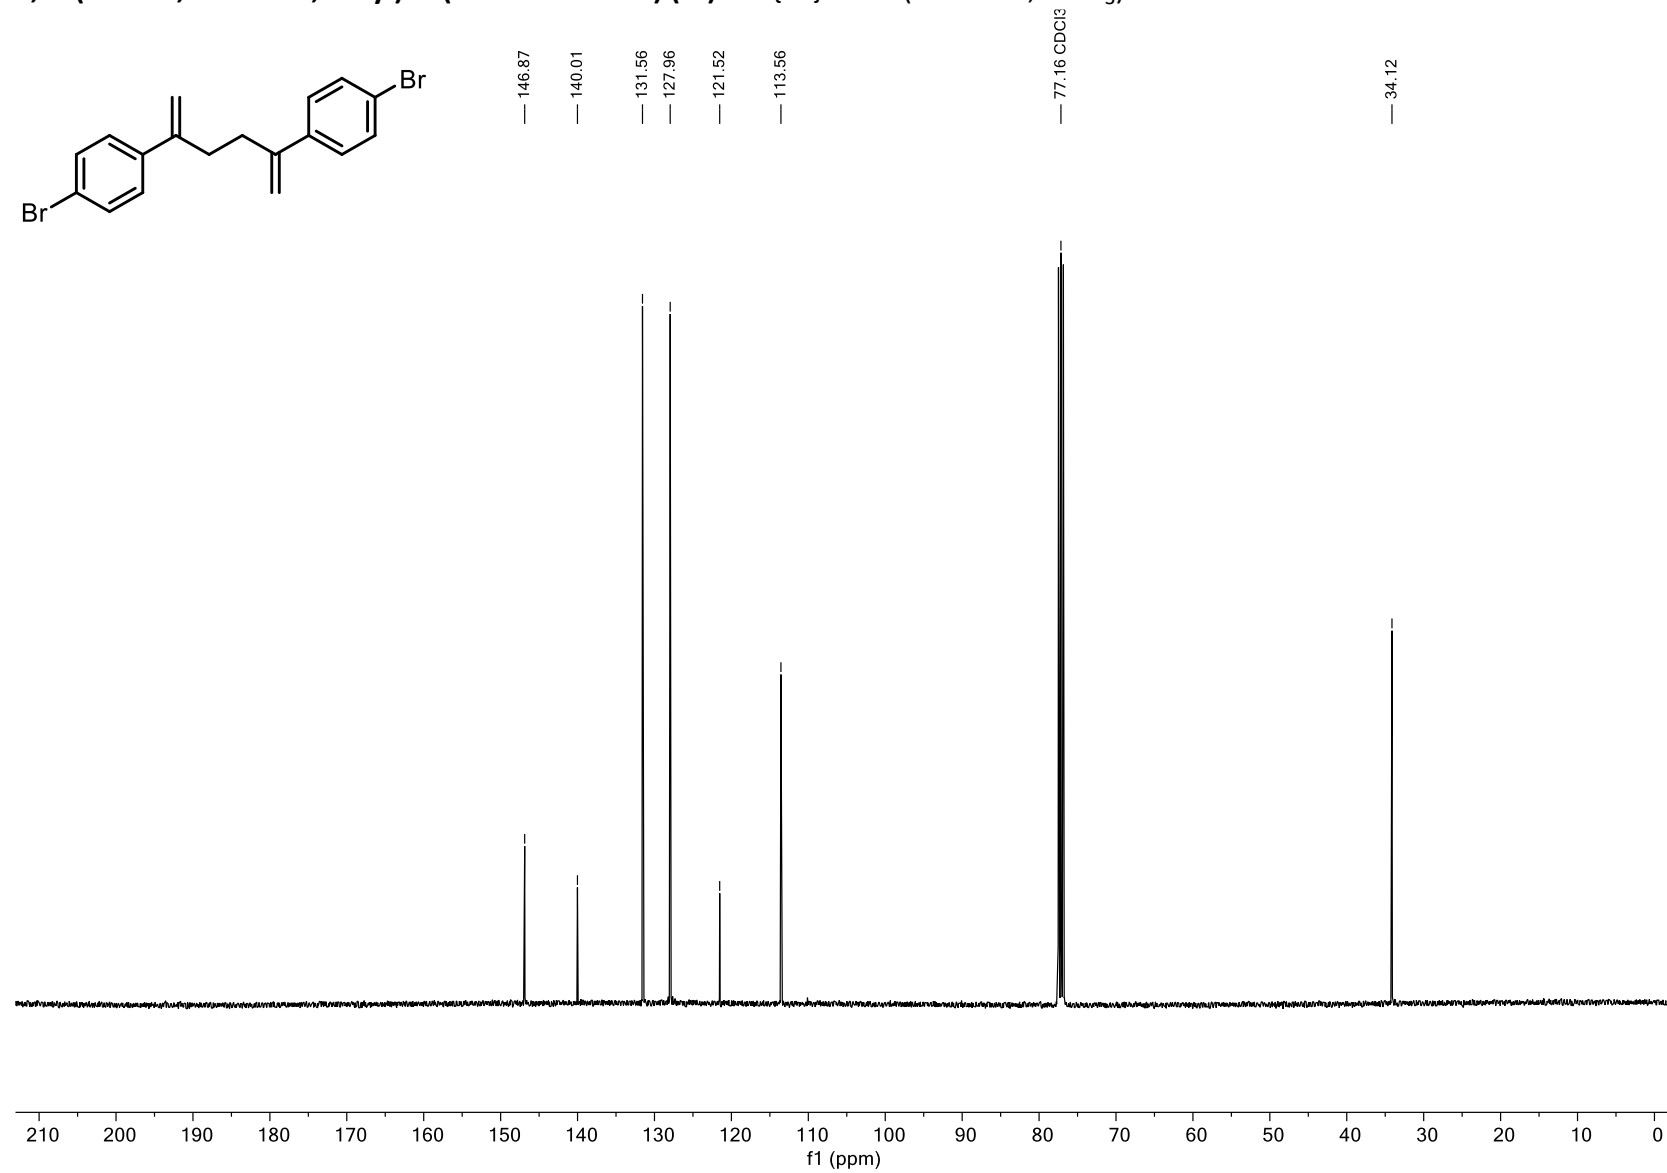

(Hexa-1,5-diene-2,5-diylbis(4,1-phenylene))bis(trimethylsilane) (**1g**):  $^1\text{H}$  NMR (300 MHz,  $\text{CDCl}_3$ )

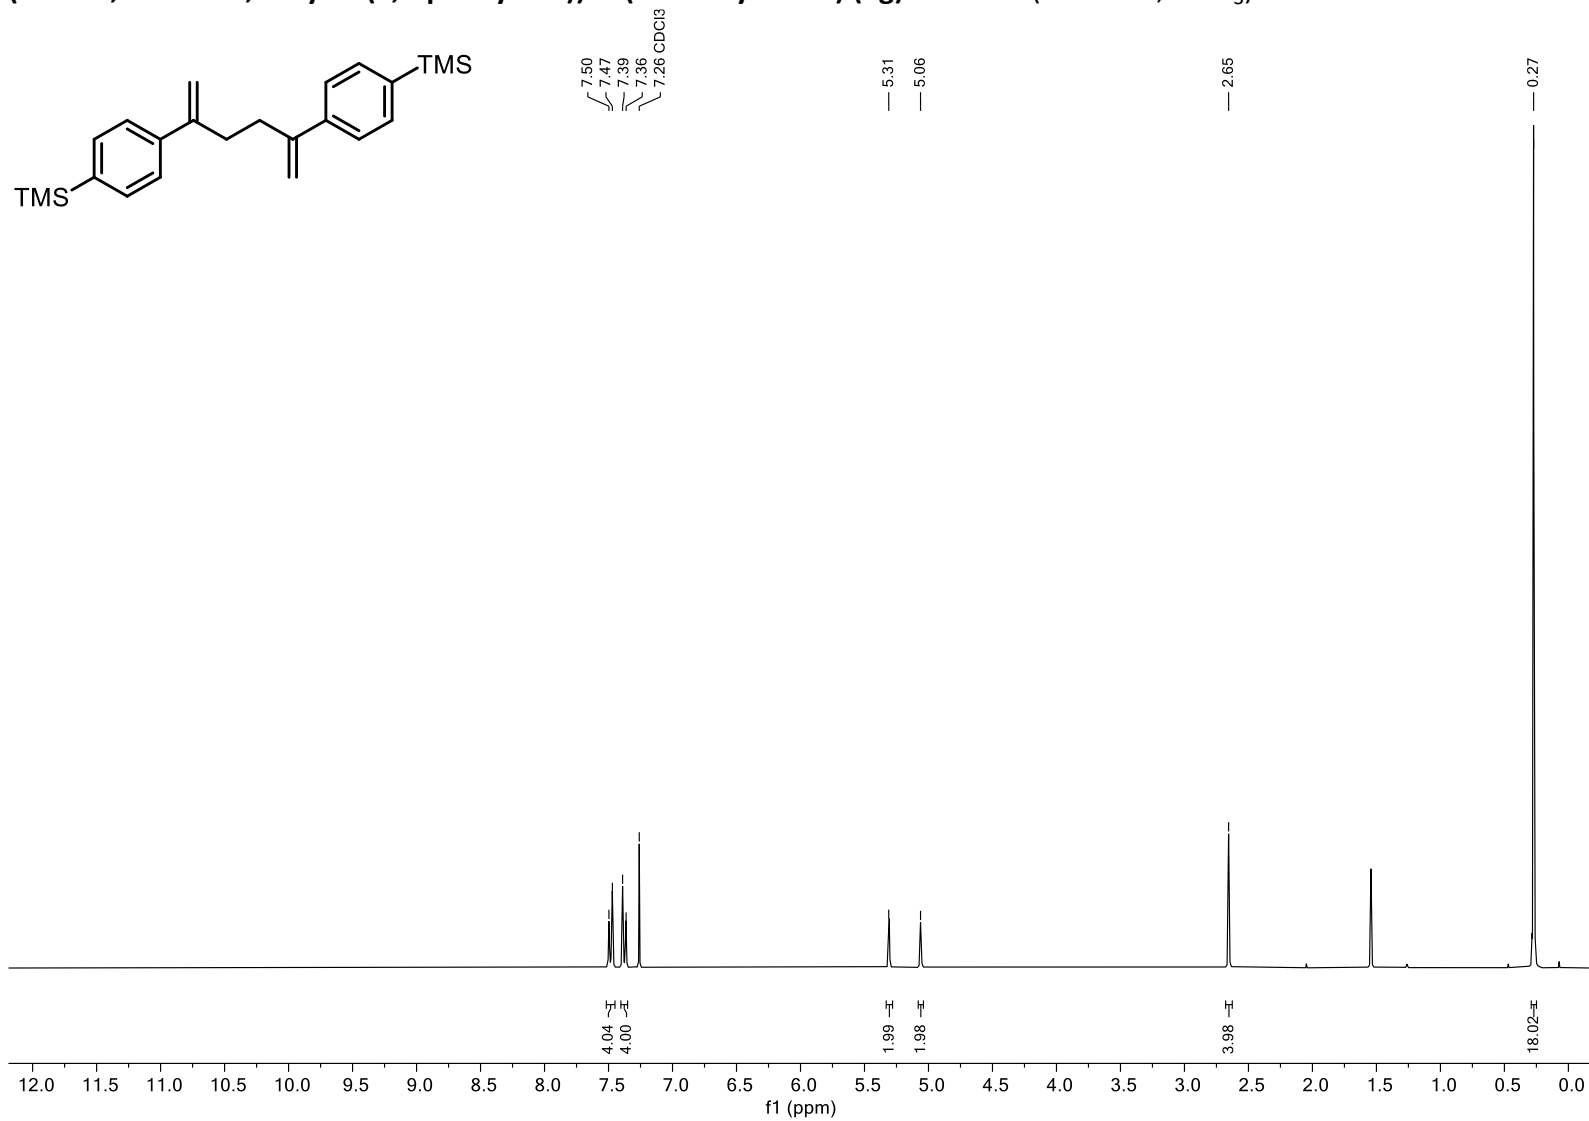

(Hexa-1,5-diene-2,5-diylbis(4,1-phenylene))bis(trimethylsilane) (1g):  $^{13}\text{C}\{^1\text{H}\}$  NMR (101 MHz,  $\text{CDCl}_3$ )

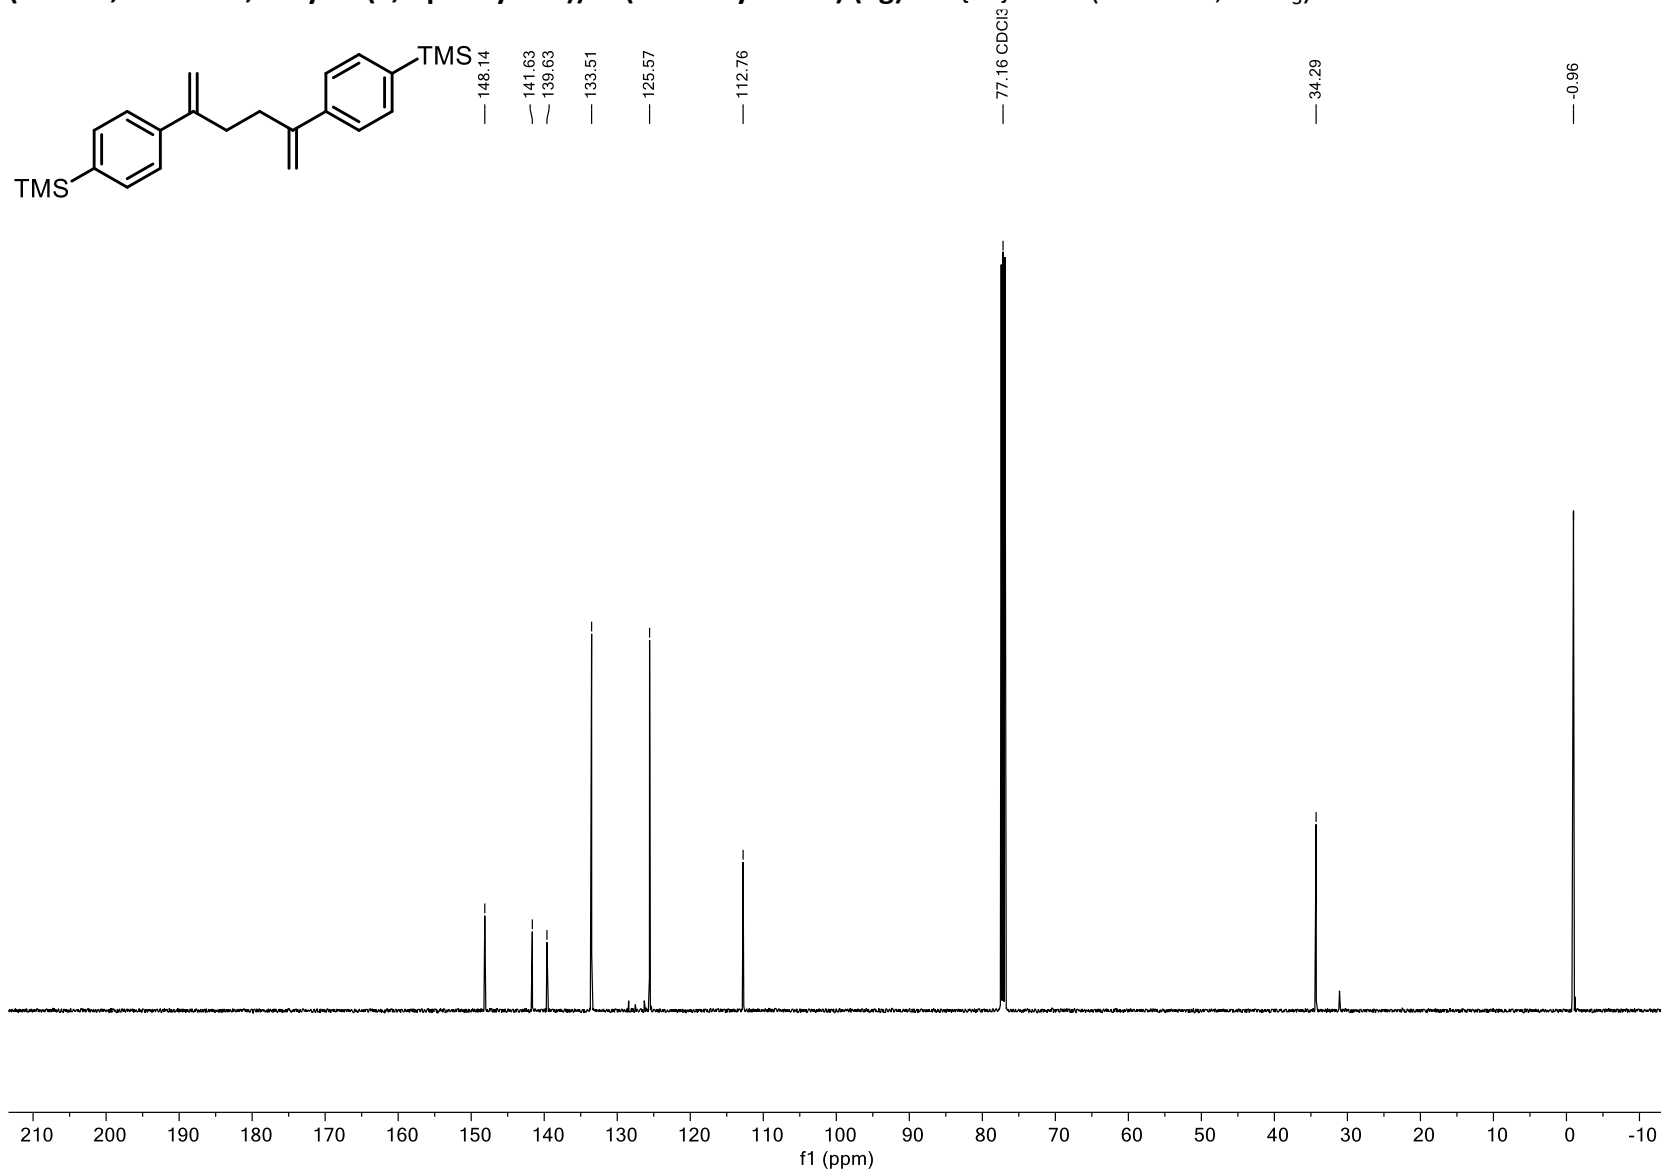

(Hexa-1,5-diene-2,5-diylbis(4,1-phenylene))bis(trimethylsilane) (**1g**):  $^{29}\text{Si}\{^1\text{H}\}$  NMR (99 MHz,  $\text{CDCl}_3$ )

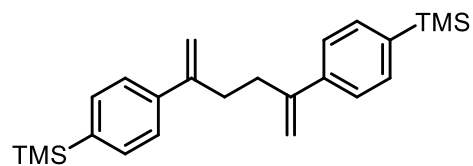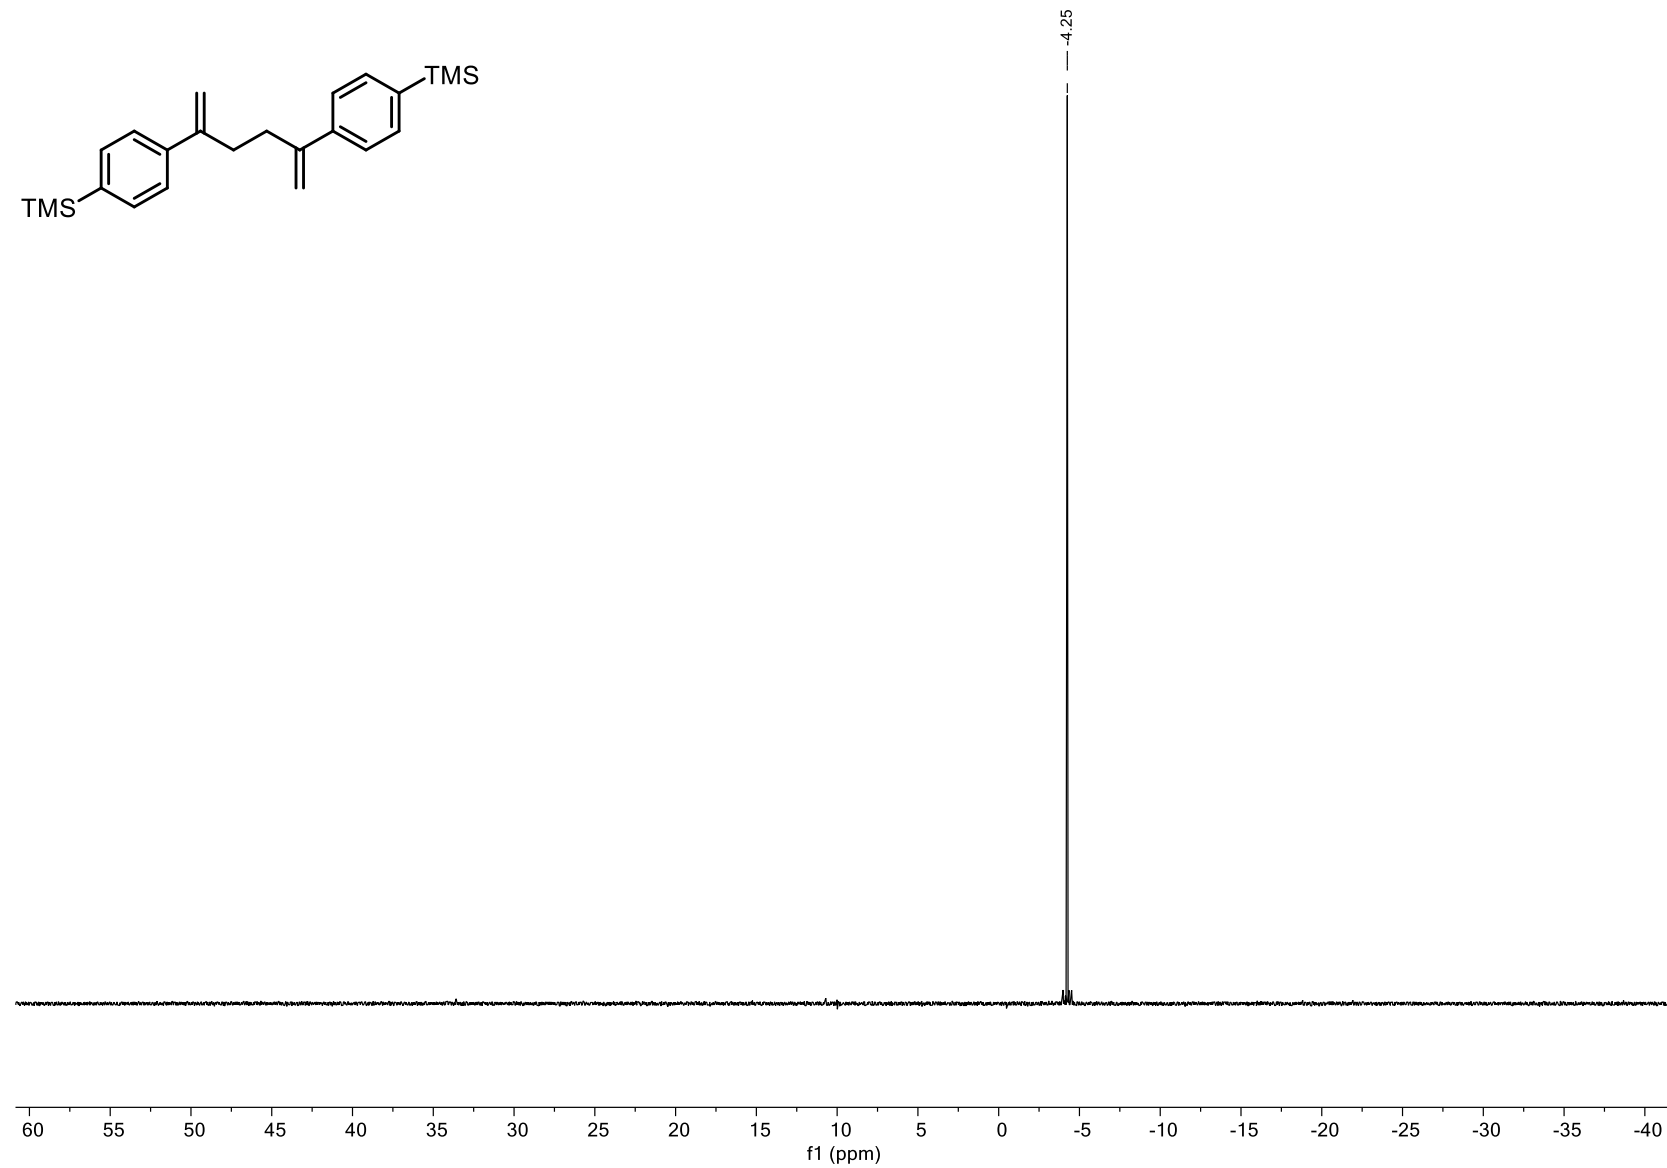

**2,2'-(Hexa-1,5-diene-2,5-diylbis(4,1-phenylene))bis(propan-2-ol) (1h):**  $^1\text{H}$  NMR (300 MHz,  $\text{CDCl}_3$ )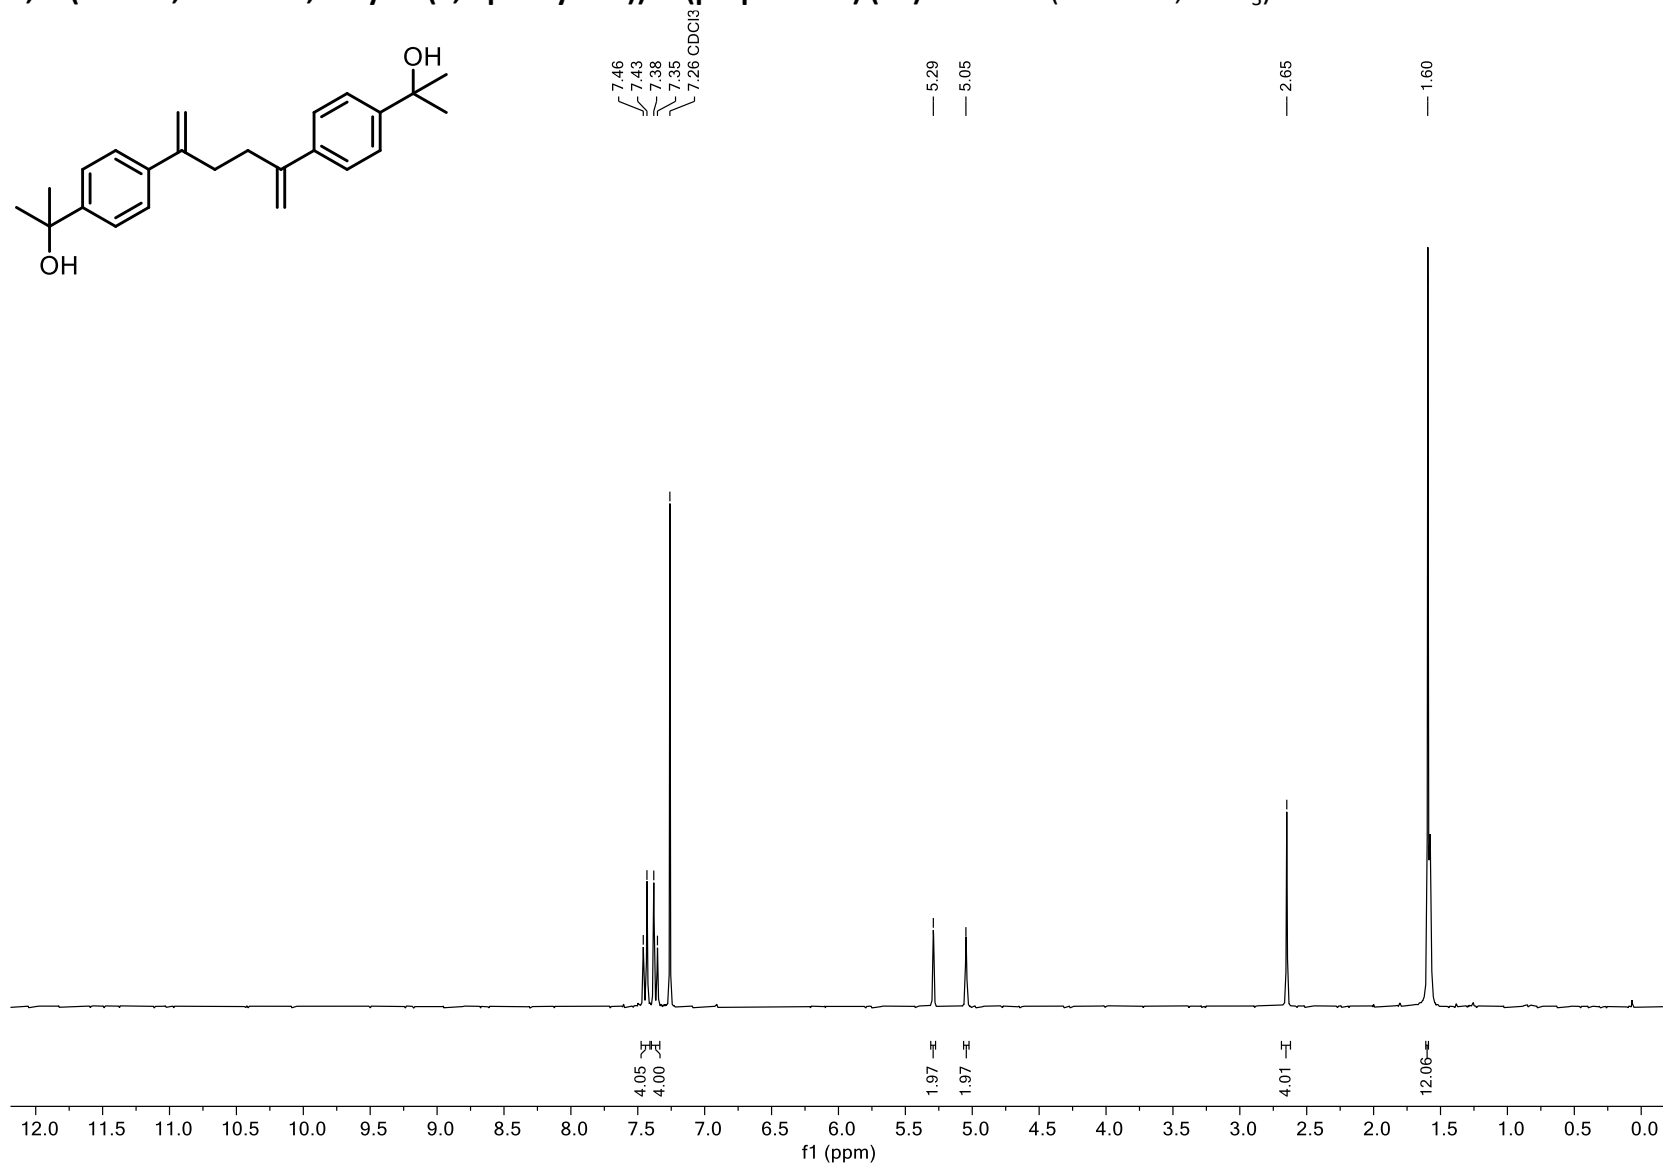

**2,2'-(Hexa-1,5-diene-2,5-diylbis(4,1-phenylene))bis(propan-2-ol) (1h):**  $^{13}\text{C}\{^1\text{H}\}$  NMR (101 MHz,  $\text{CDCl}_3$ )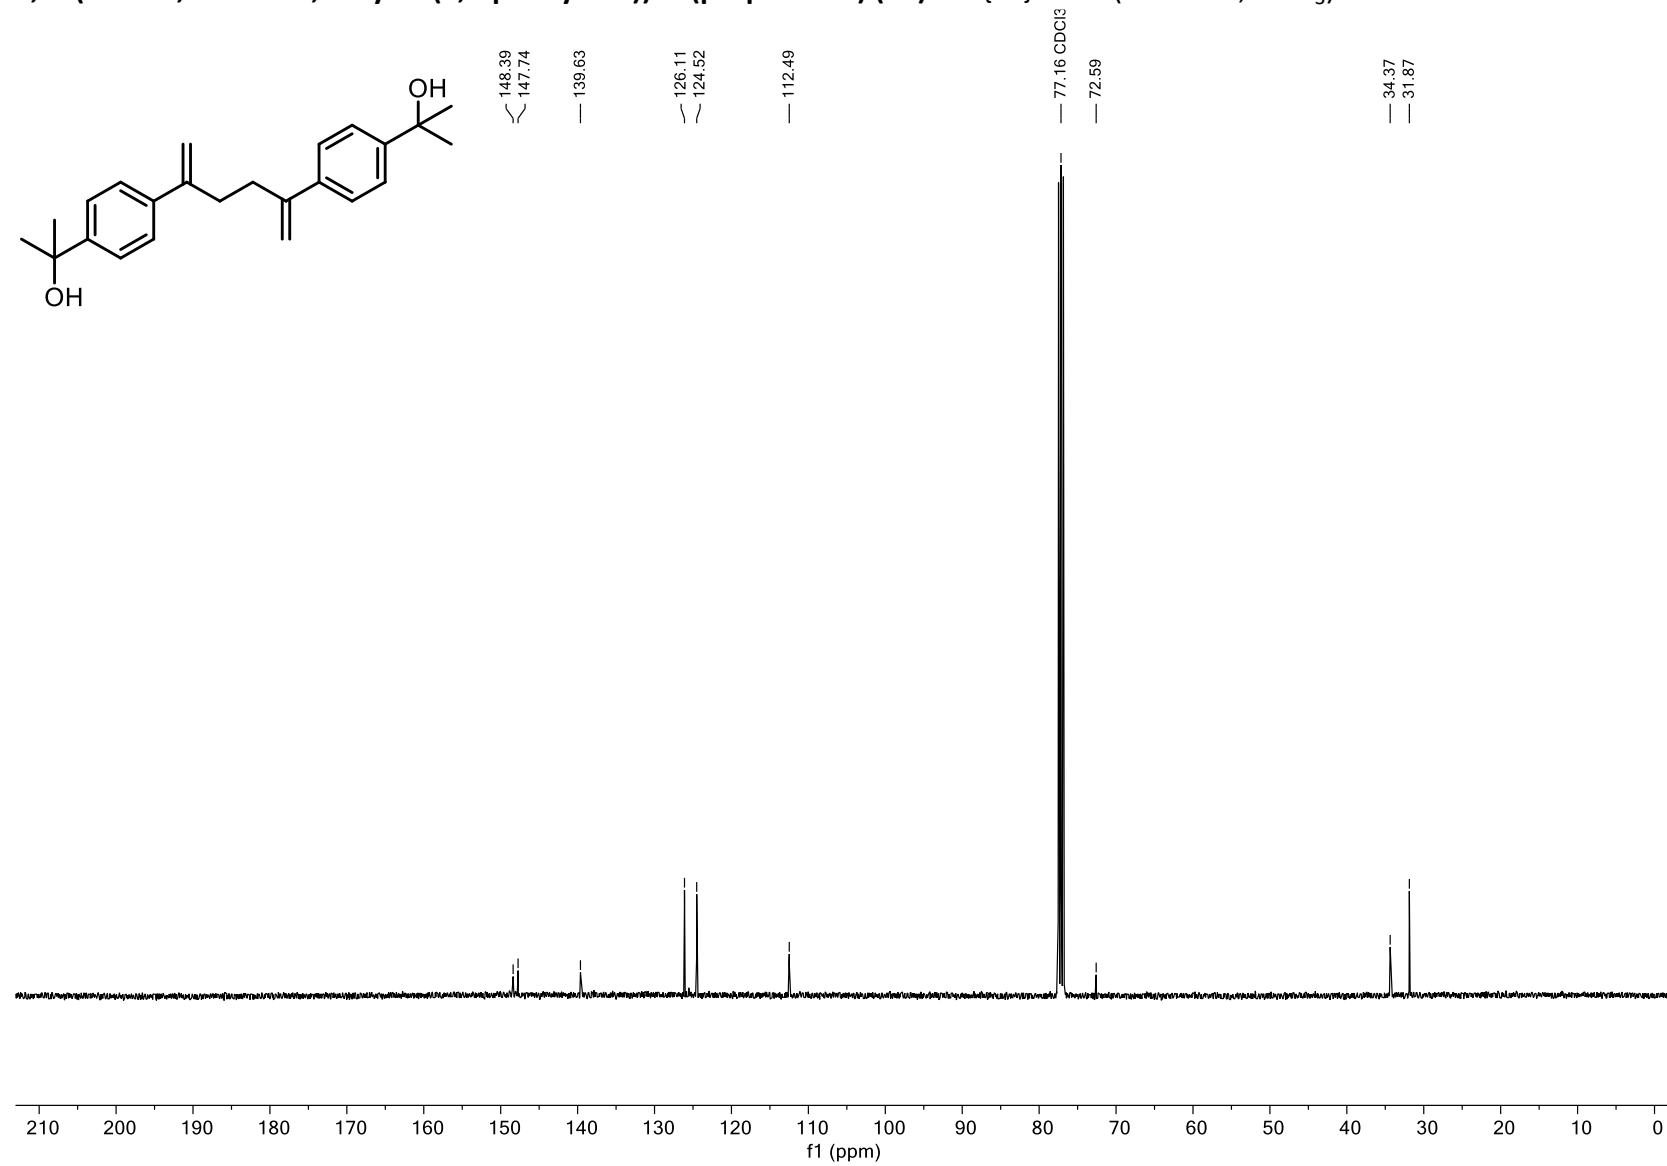



**1,4-Di-*p*-tolylbutane-1,4-dione (S6):**  $^1\text{H}$  NMR (300 MHz,  $\text{CDCl}_3$ )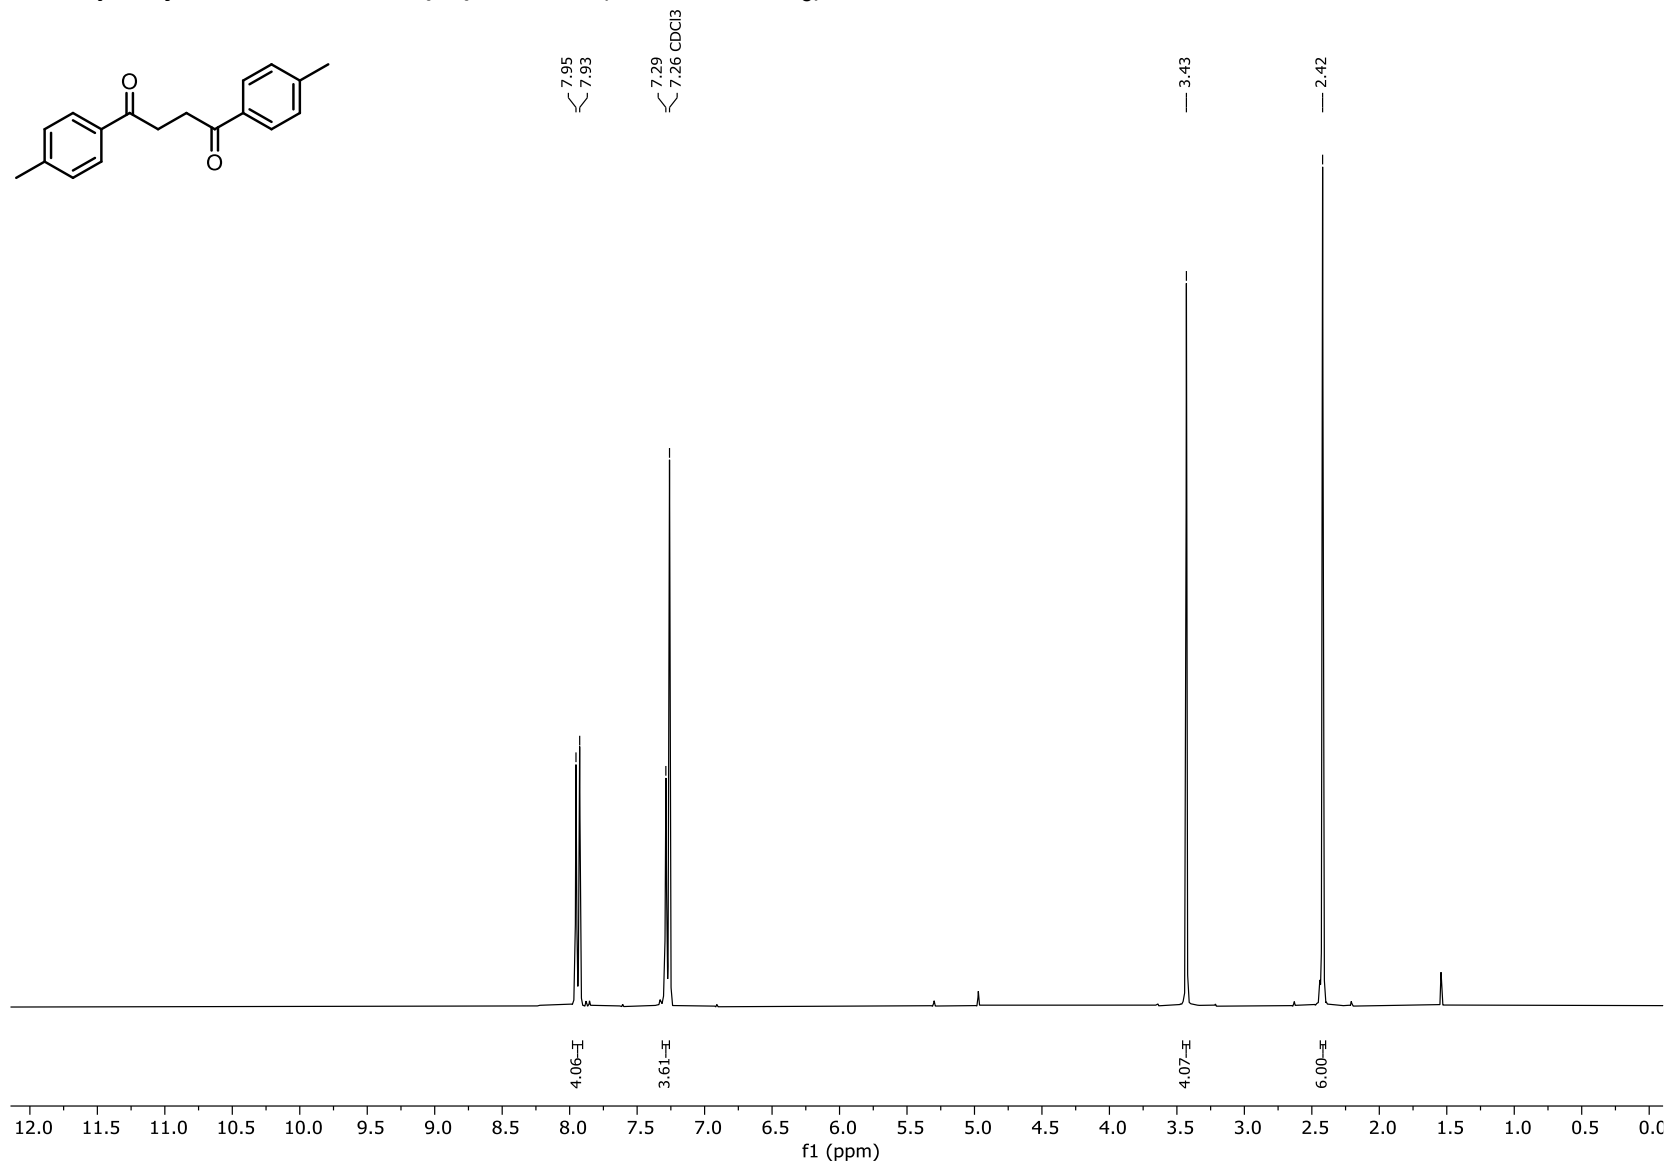

**1,4-Di-*p*-tolylbutane-1,4-dione (S6):**  $^{13}\text{C}\{^1\text{H}\}$  NMR (101 MHz,  $\text{CDCl}_3$ )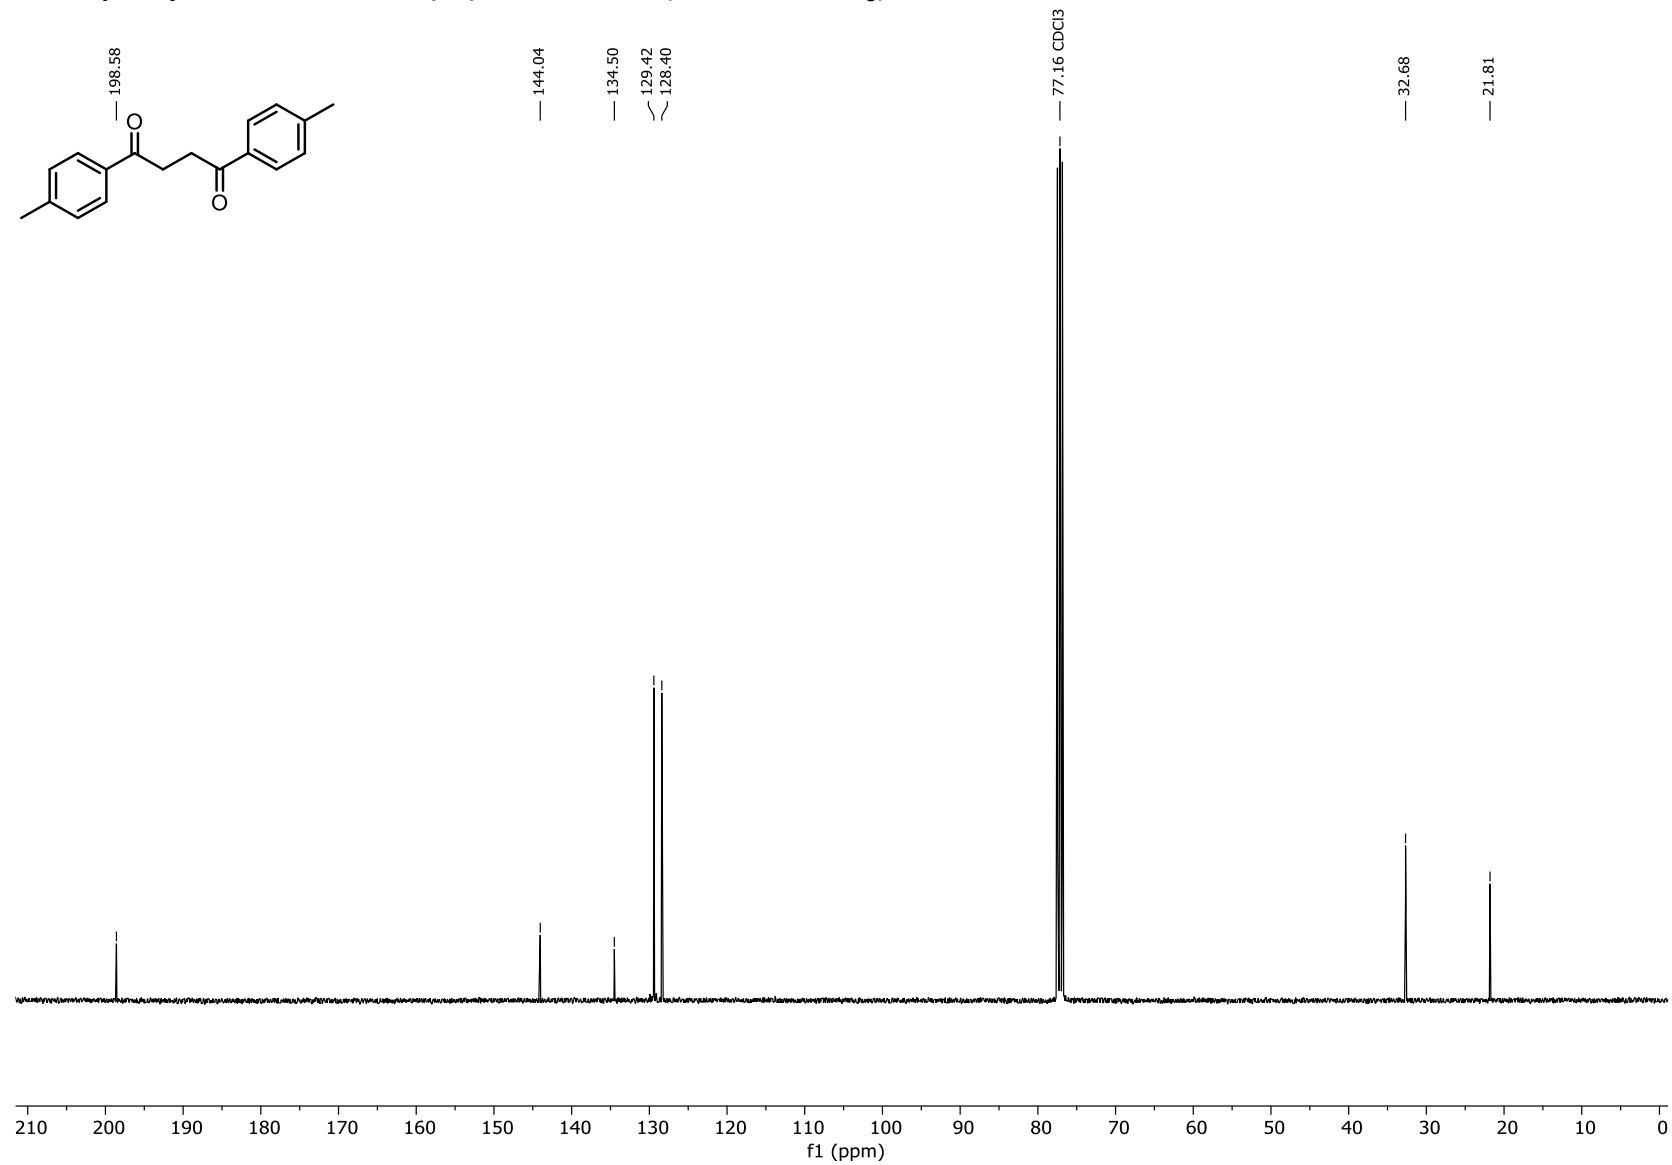

**4,4'-(Hexa-1,5-diene-2,5-diyl)bis(methylbenzene) (1i):**  $^1\text{H}$  NMR (300 MHz,  $\text{CDCl}_3$ )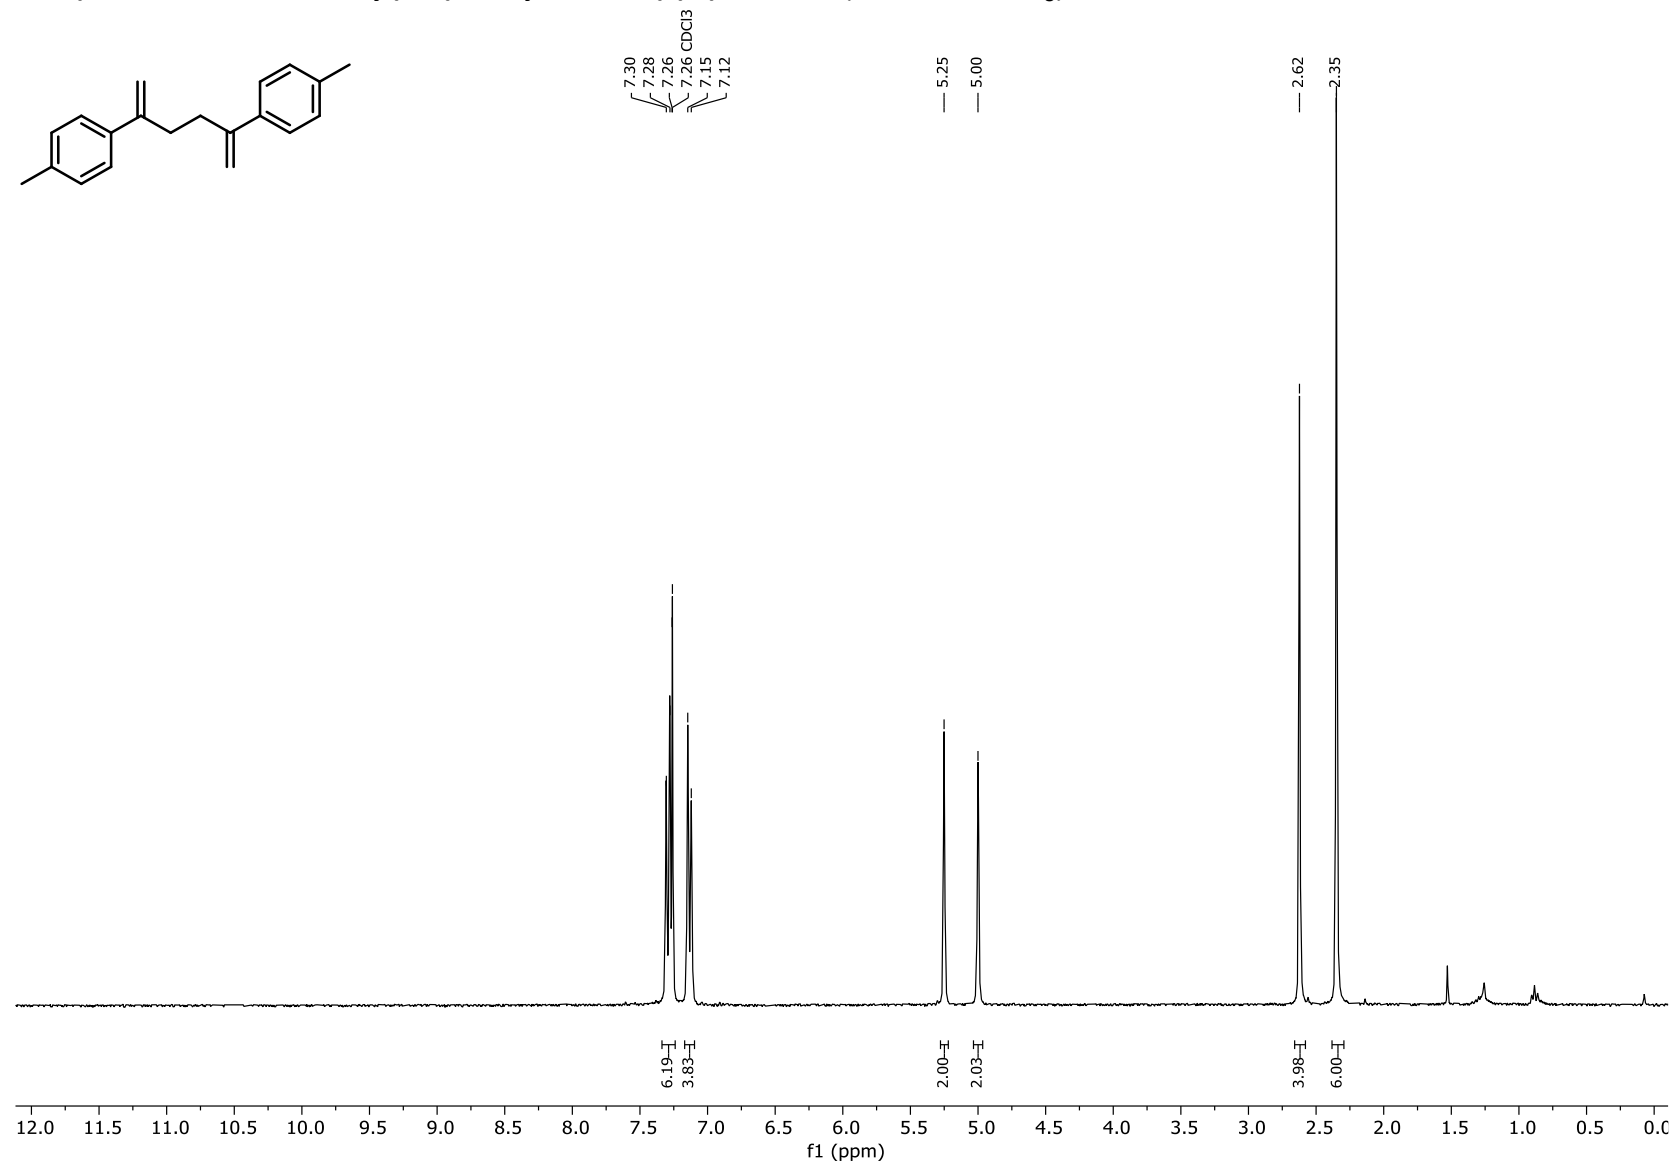

**4,4'-(Hexa-1,5-diene-2,5-diyl)bis(methylbenzene) (1i):**  $^{13}\text{C}\{^1\text{H}\}$  NMR (101 MHz,  $\text{CDCl}_3$ )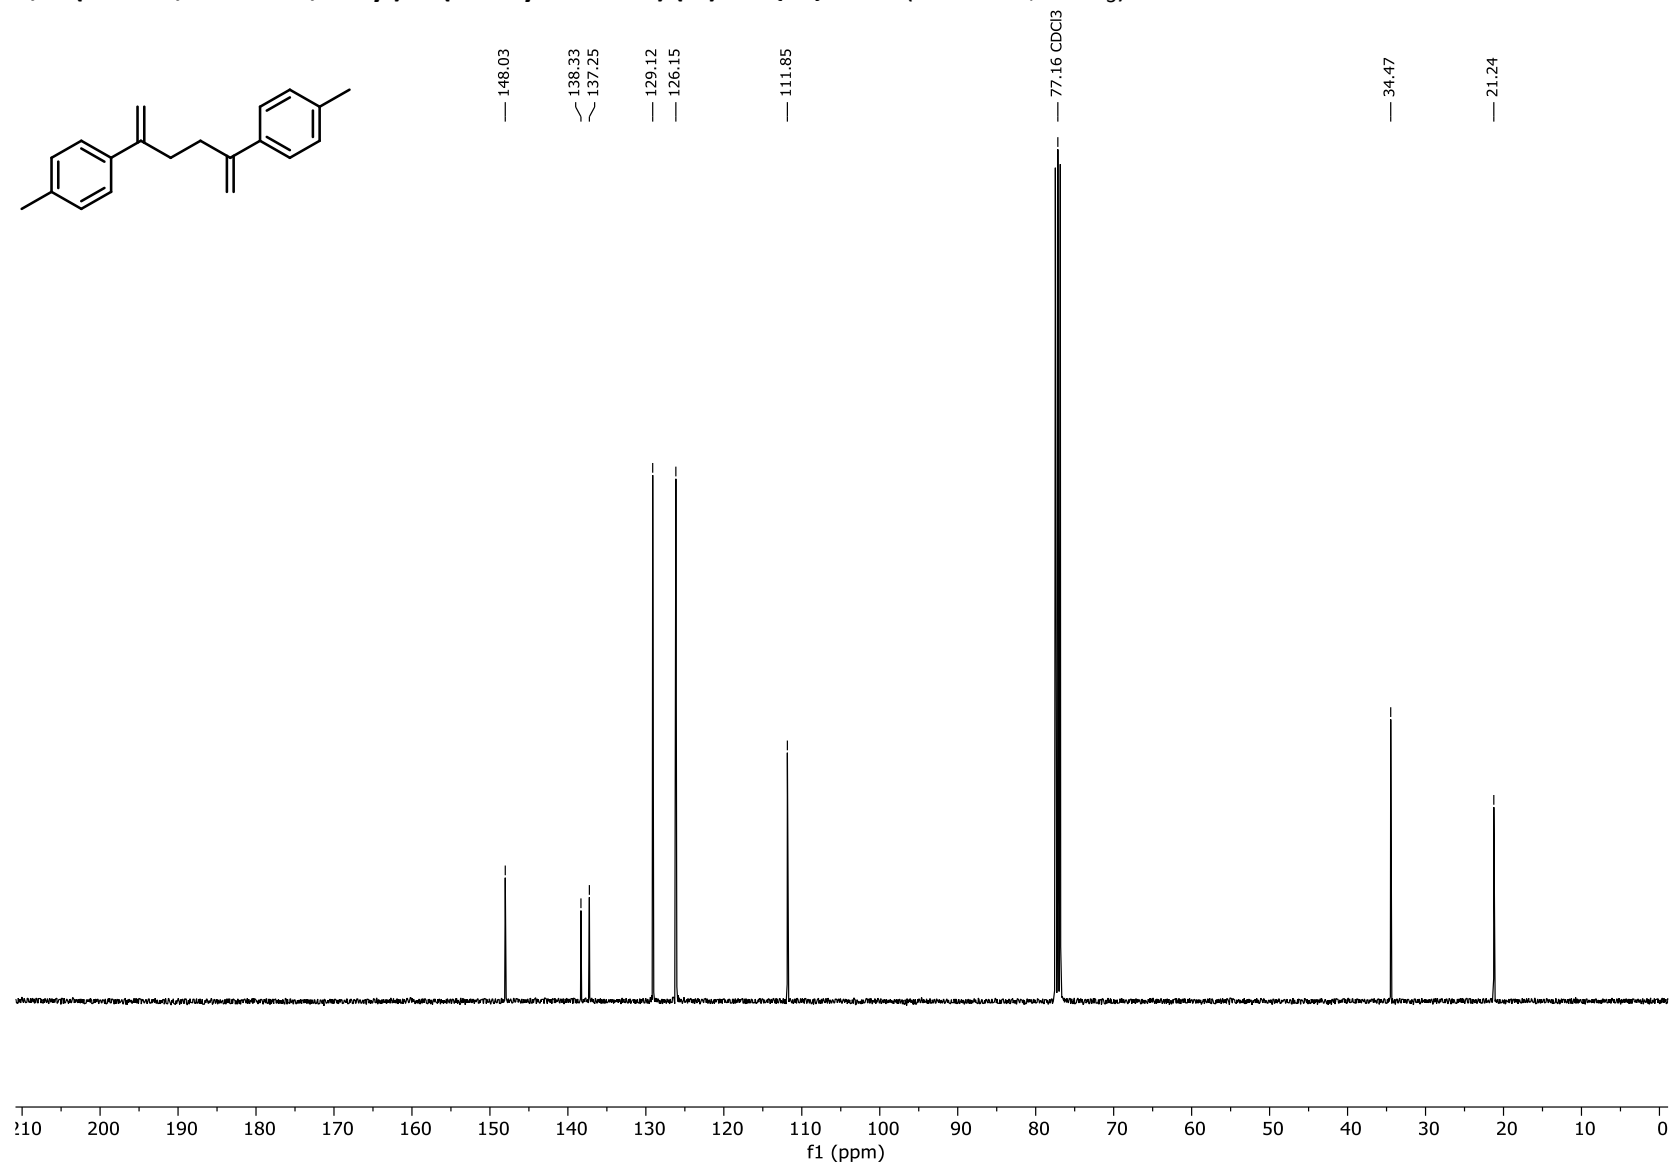

**2-Bromo-1-(*m*-tolyl)ethan-1-one (S7):**  $^1\text{H}$  NMR (300 MHz,  $\text{CDCl}_3$ )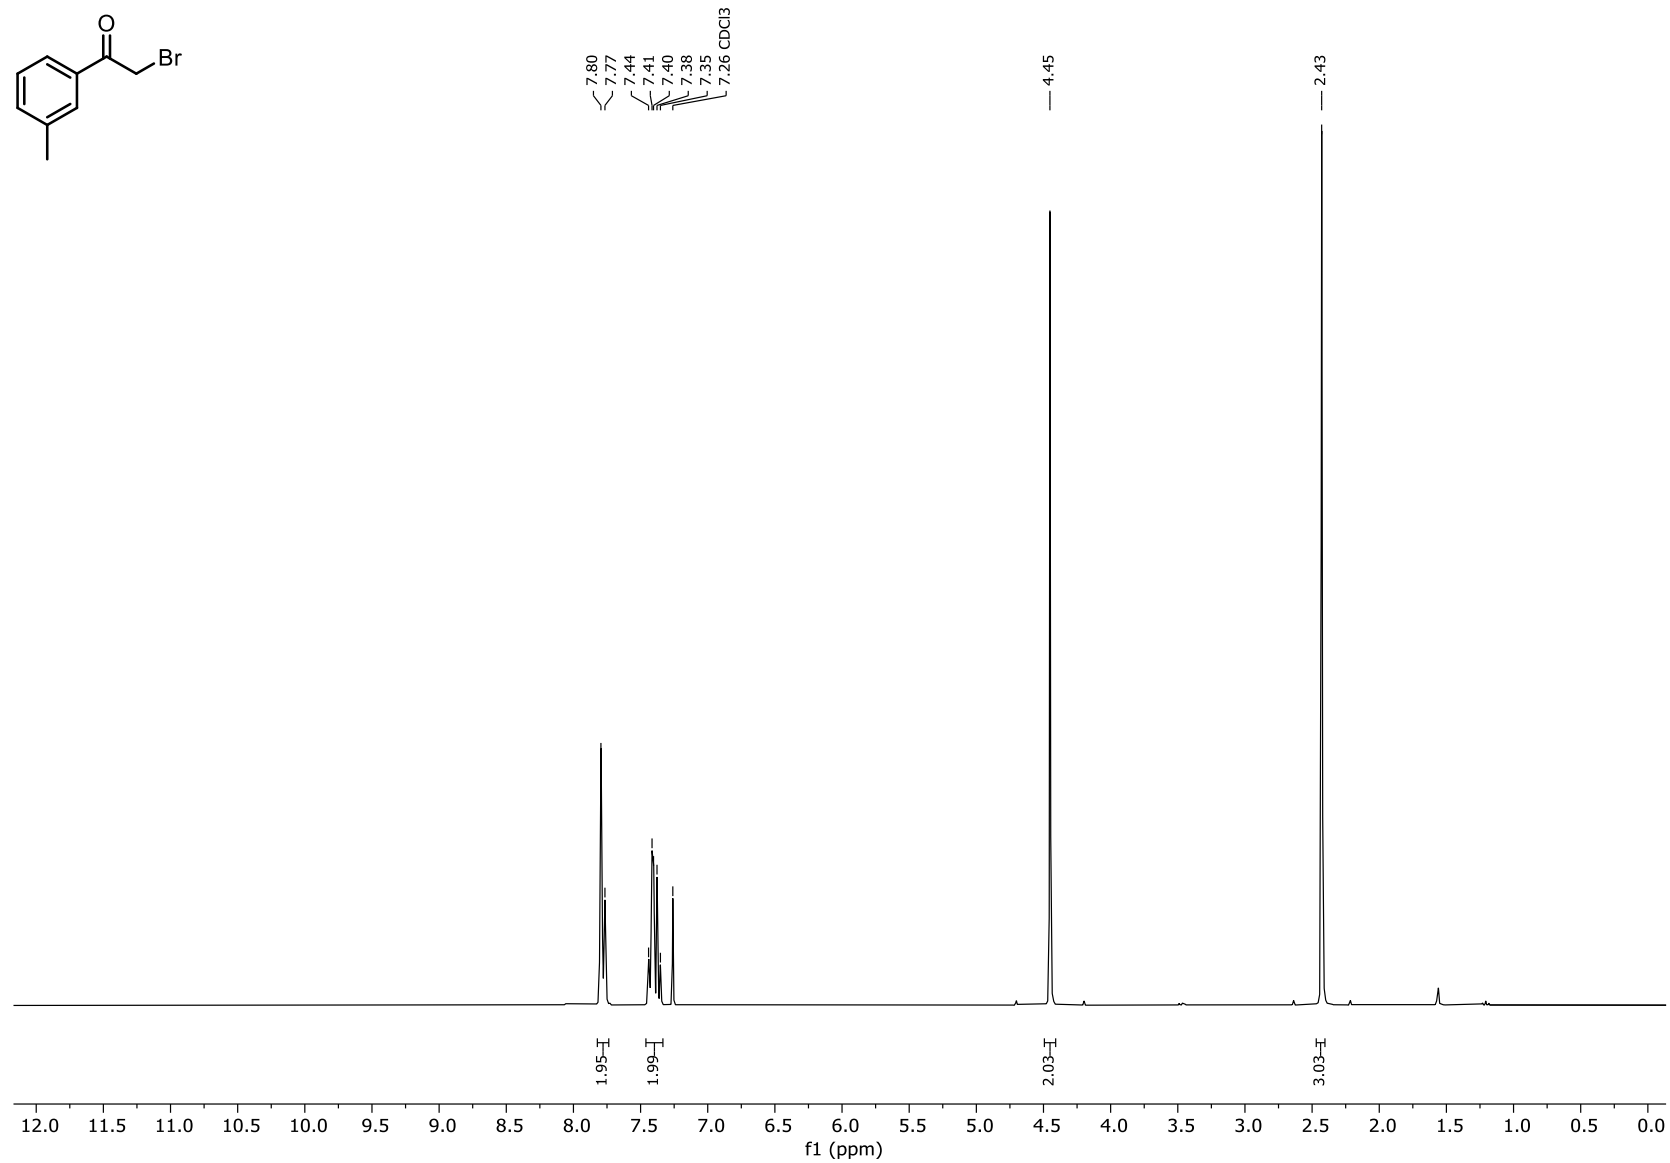

**2-Bromo-1-(*m*-tolyl)ethan-1-one (S7):**  $^{13}\text{C}\{^1\text{H}\}$  NMR (101 MHz,  $\text{CDCl}_3$ )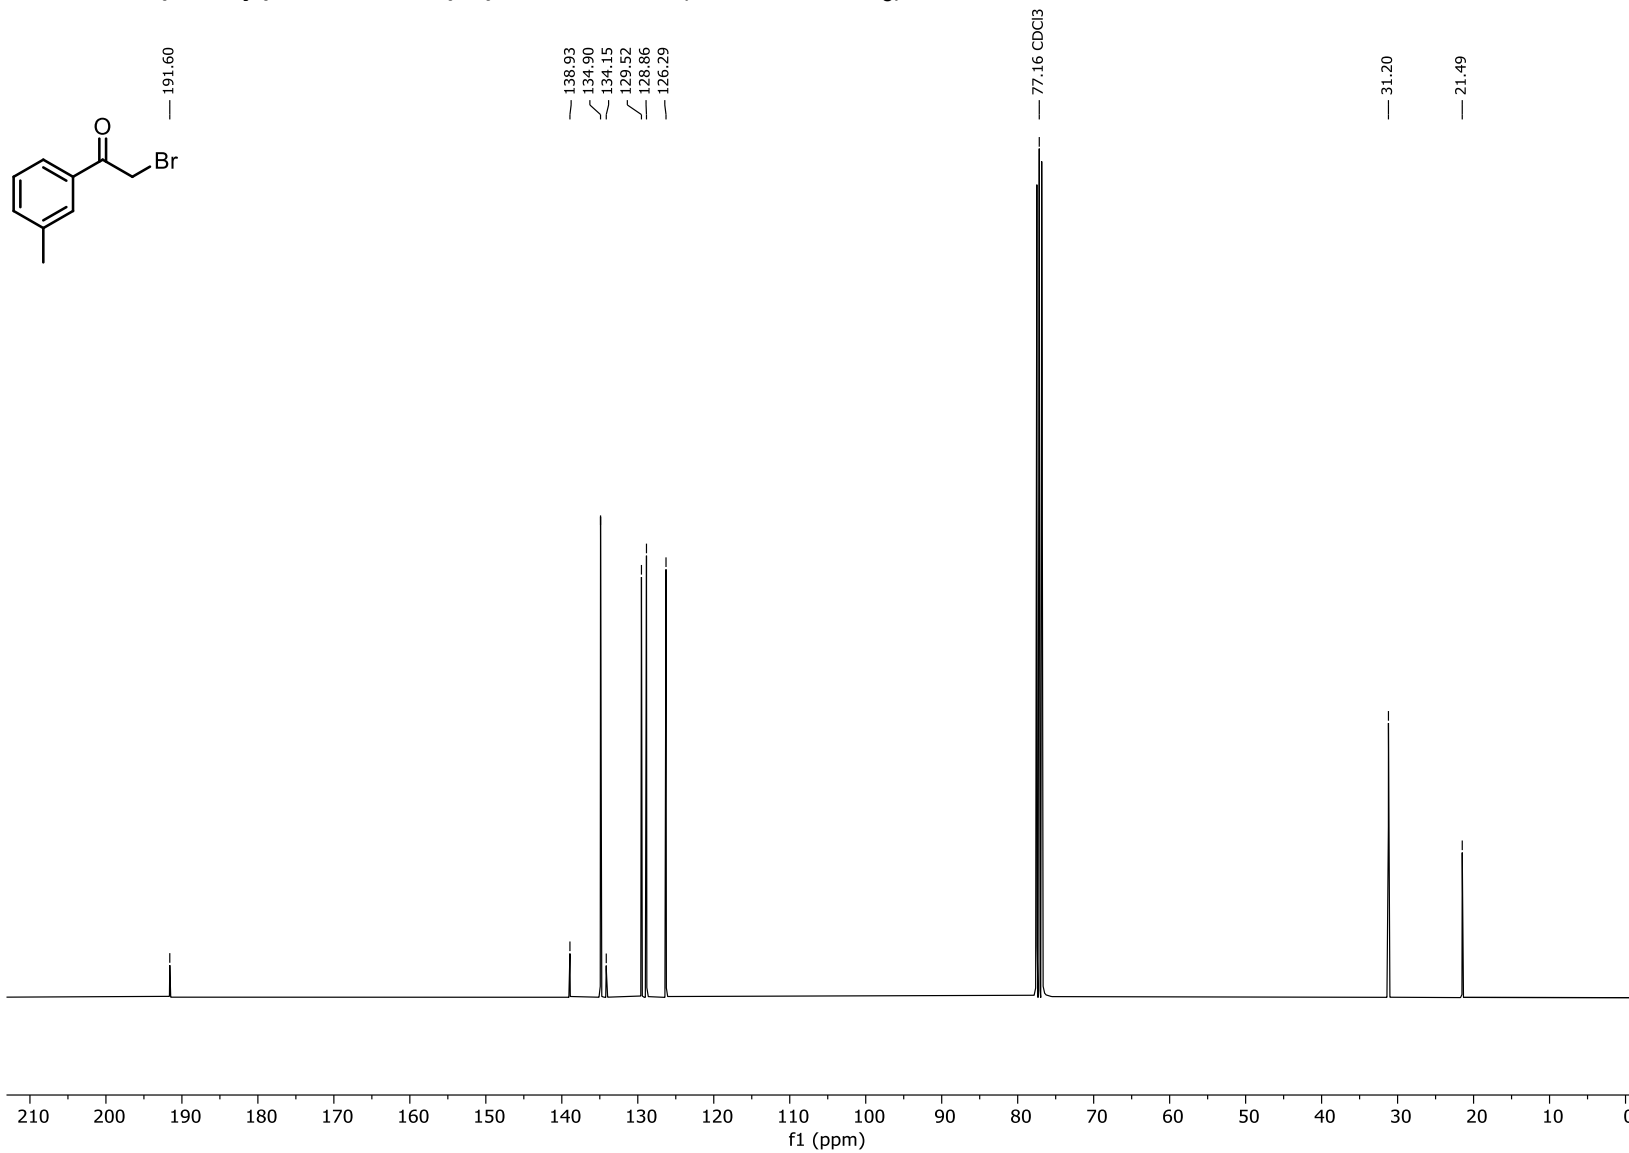

**1,4-Di-*m*-tolylbutane-1,4-dione (S8):**  $^1\text{H}$  NMR (300 MHz,  $\text{CDCl}_3$ )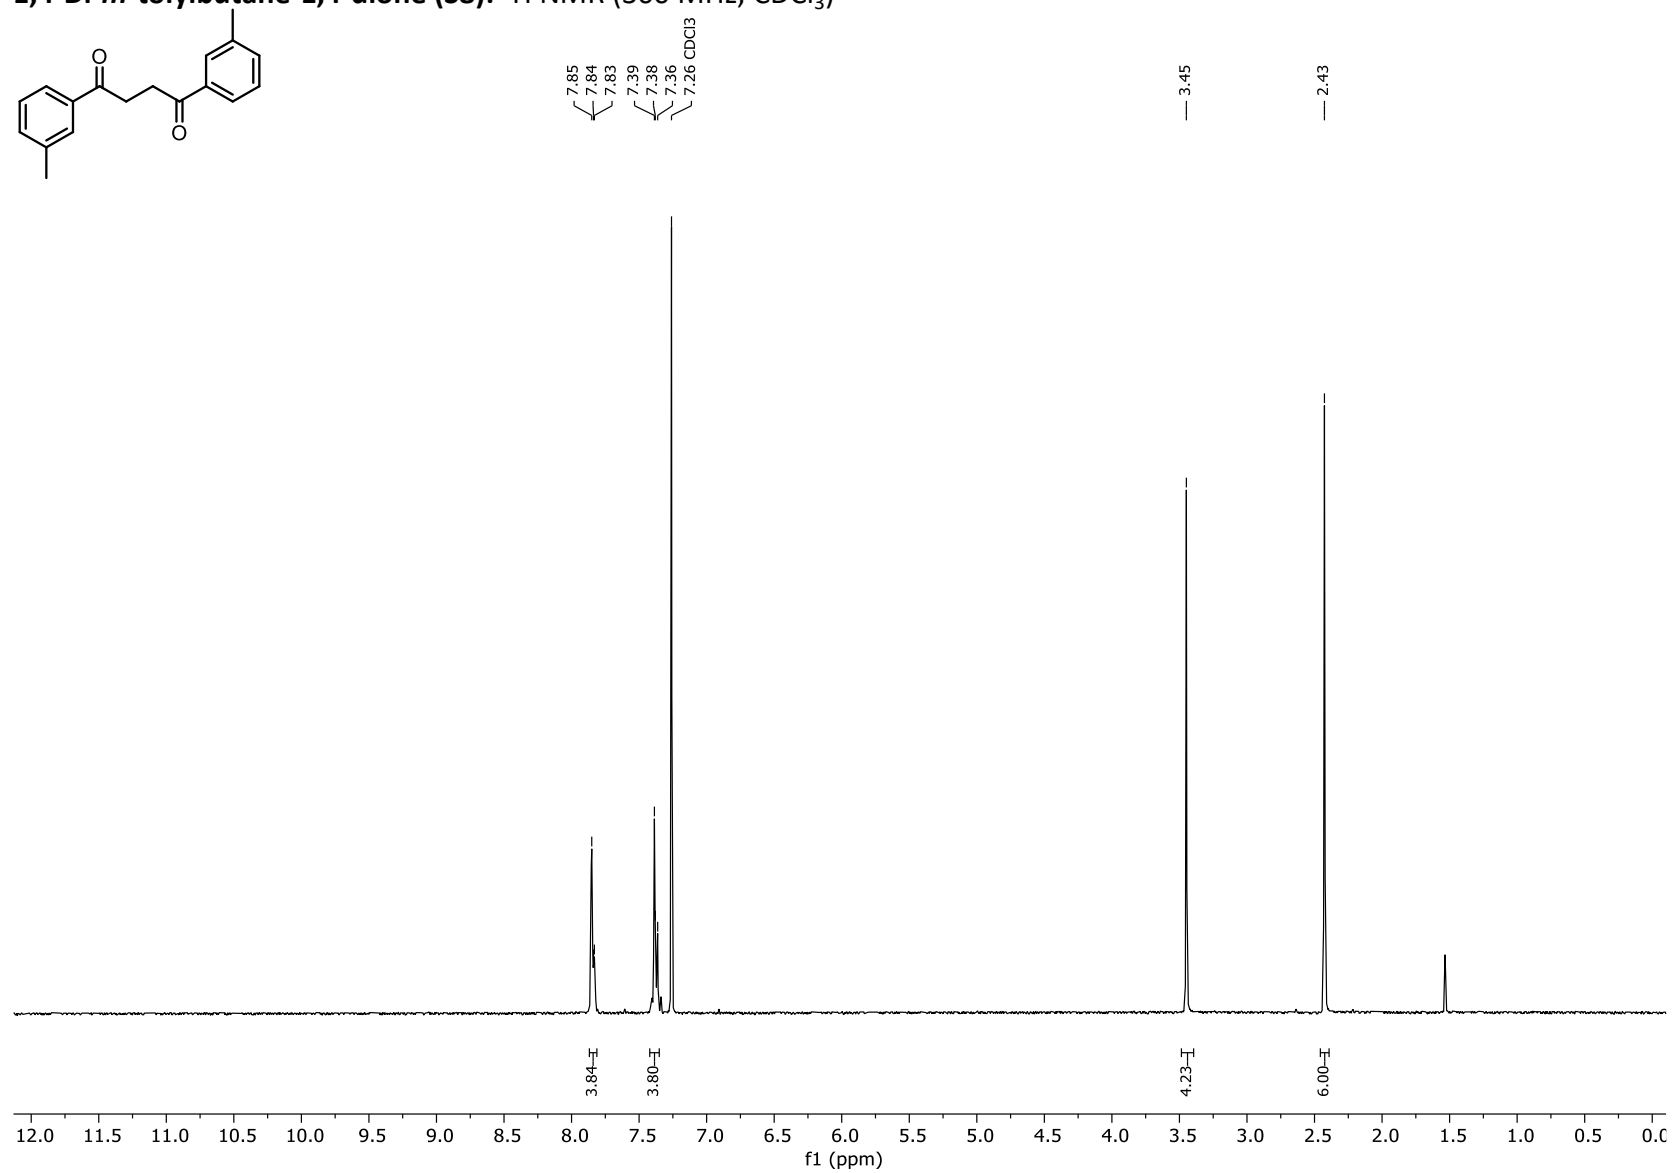

**1,4-Di-*m*-tolylbutane-1,4-dione (S8):**  $^{13}\text{C}\{^1\text{H}\}$  NMR (101 MHz,  $\text{CDCl}_3$ )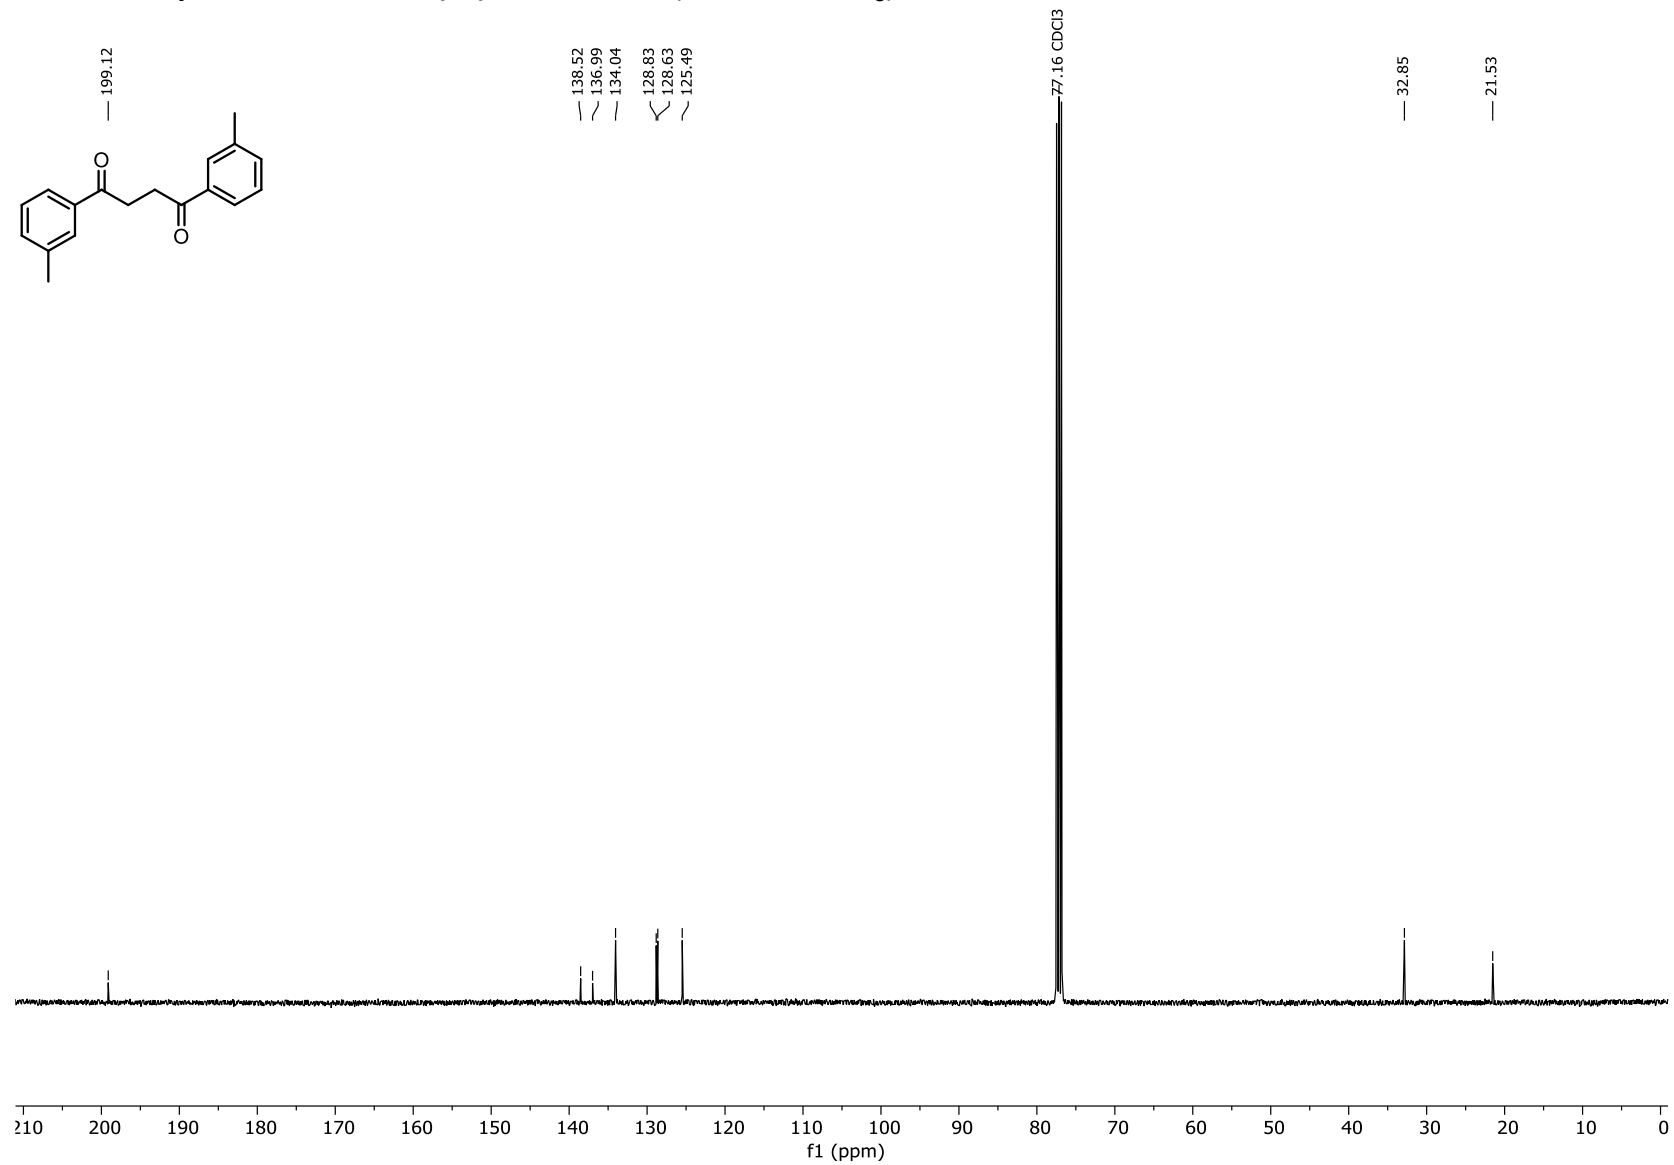



**3,3'-(Hexa-1,5-diene-2,5-diyl)bis(methylbenzene) (1j):**  $^1\text{H}$  NMR (300 MHz,  $\text{CDCl}_3$ )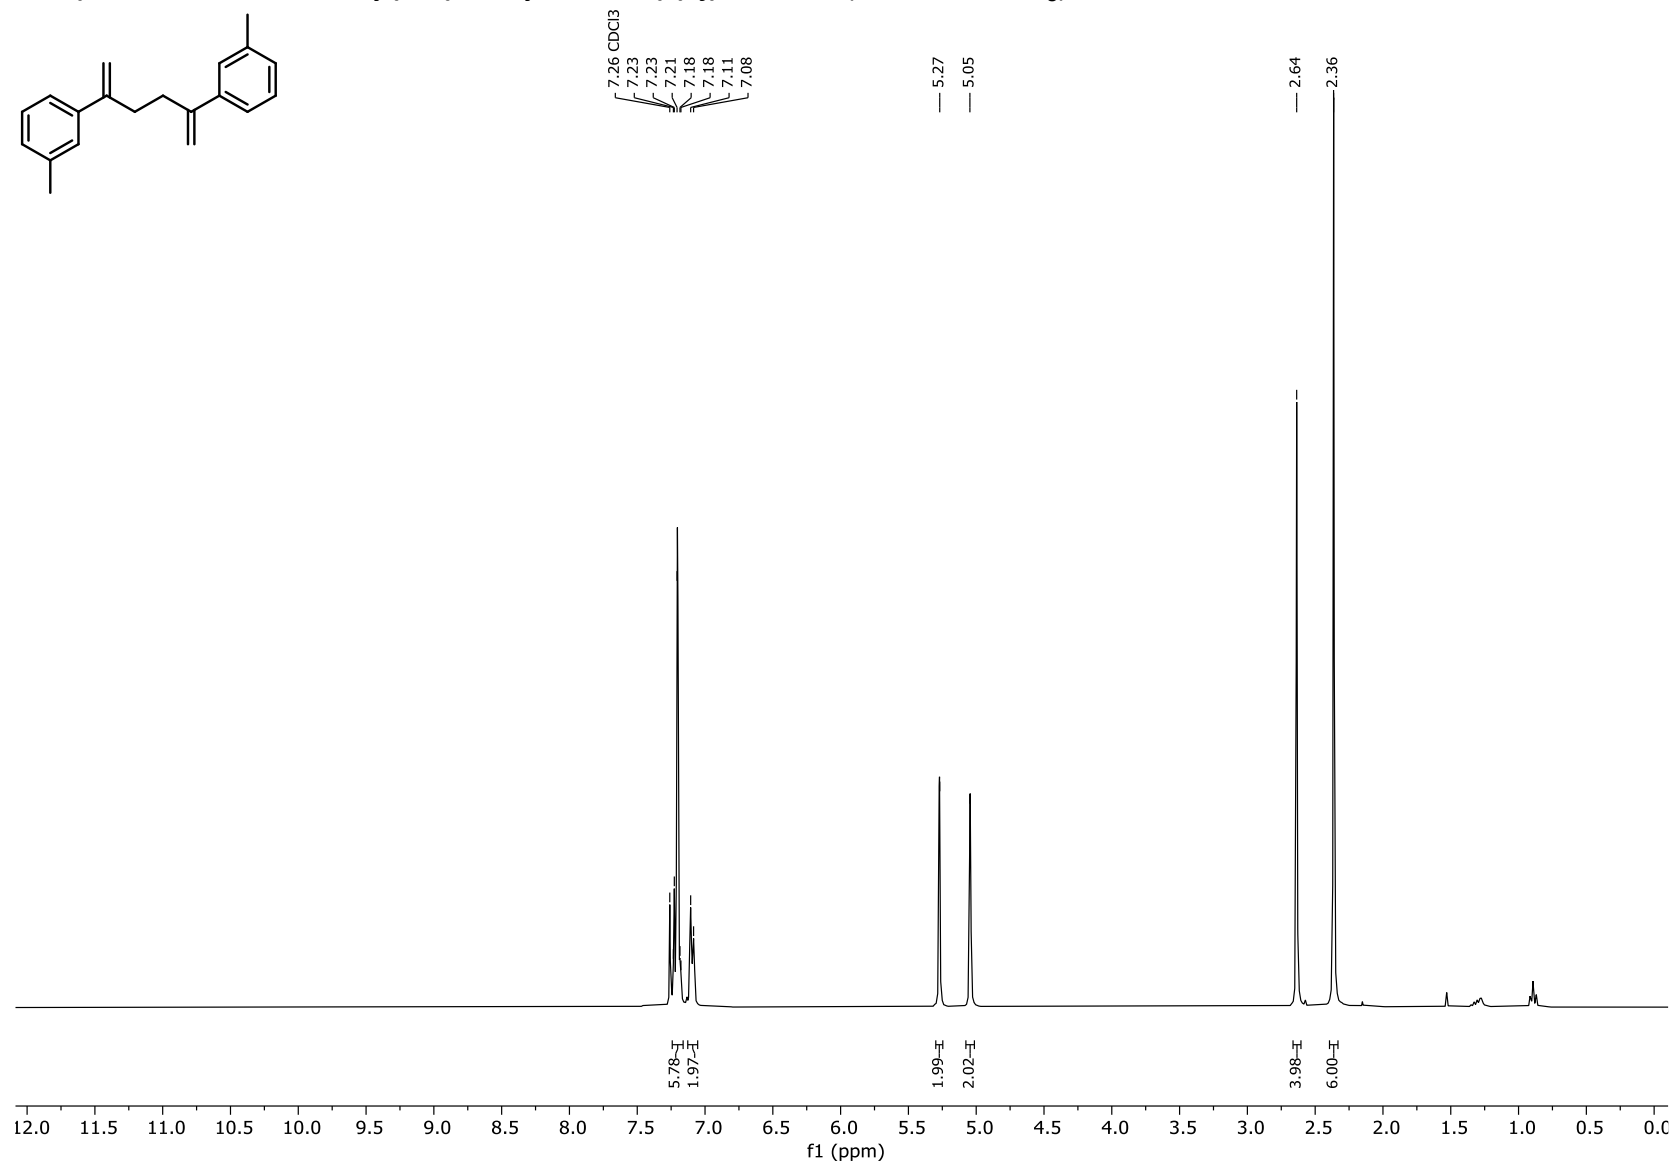

**3,3'-(Hexa-1,5-diene-2,5-diyl)bis(methylbenzene) (1j):**  $^{13}\text{C}\{^1\text{H}\}$  NMR (101 MHz,  $\text{CDCl}_3$ )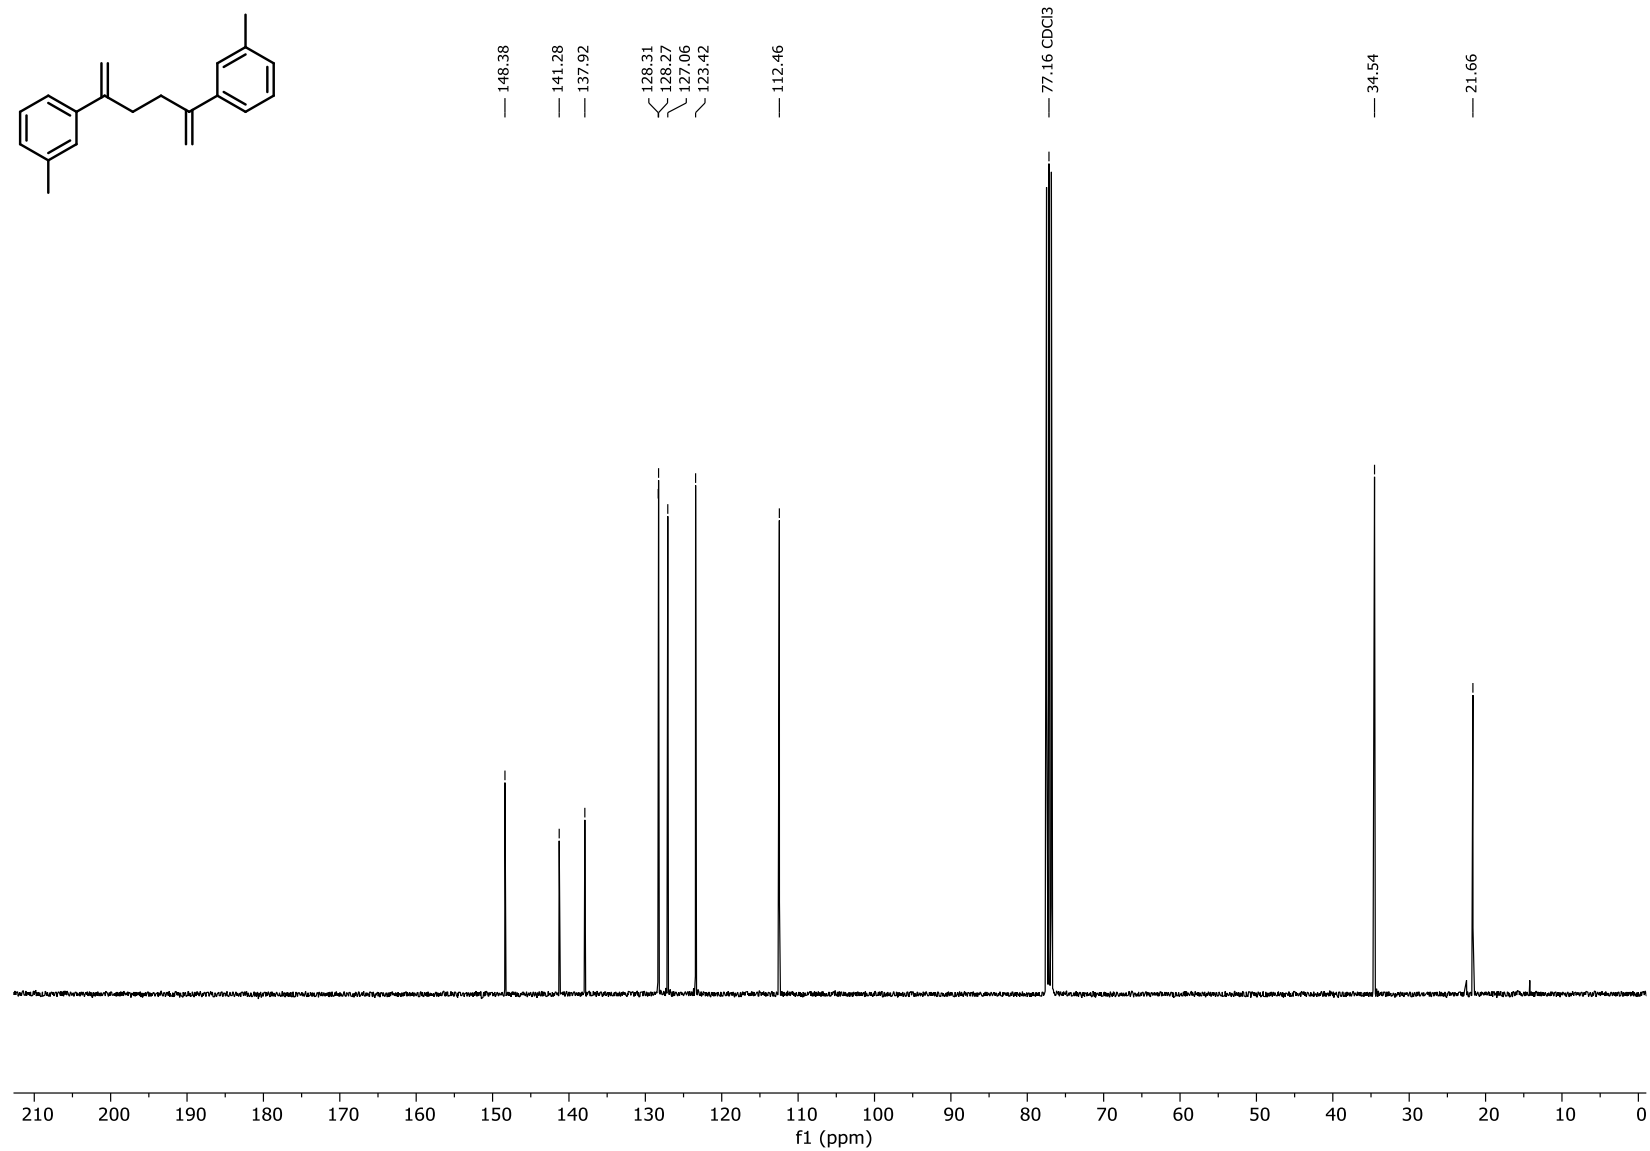

**2-Bromo-1-(o-tolyl)ethan-1-one (S9):**  $^1\text{H}$  NMR (300 MHz,  $\text{CDCl}_3$ )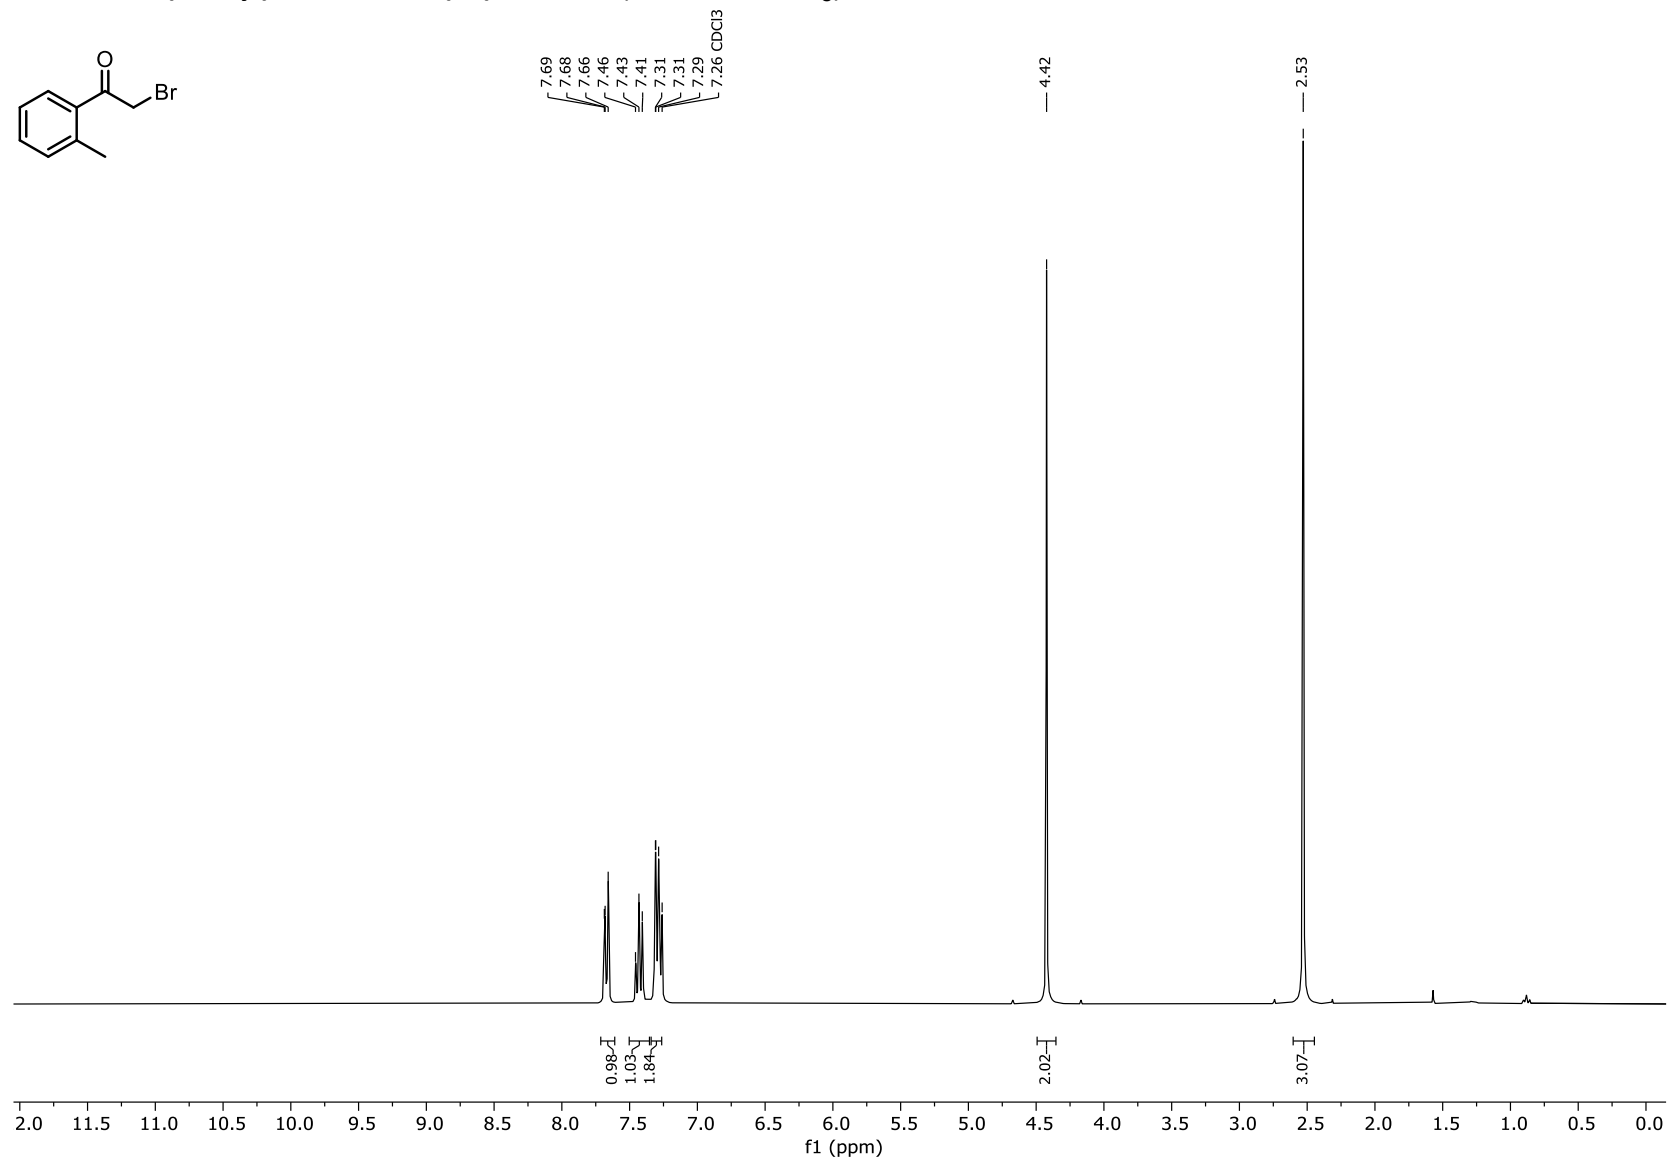

**2-Bromo-1-(*o*-tolyl)ethan-1-one (S9):**  $^{13}\text{C}\{^1\text{H}\}$  NMR (101 MHz,  $\text{CDCl}_3$ )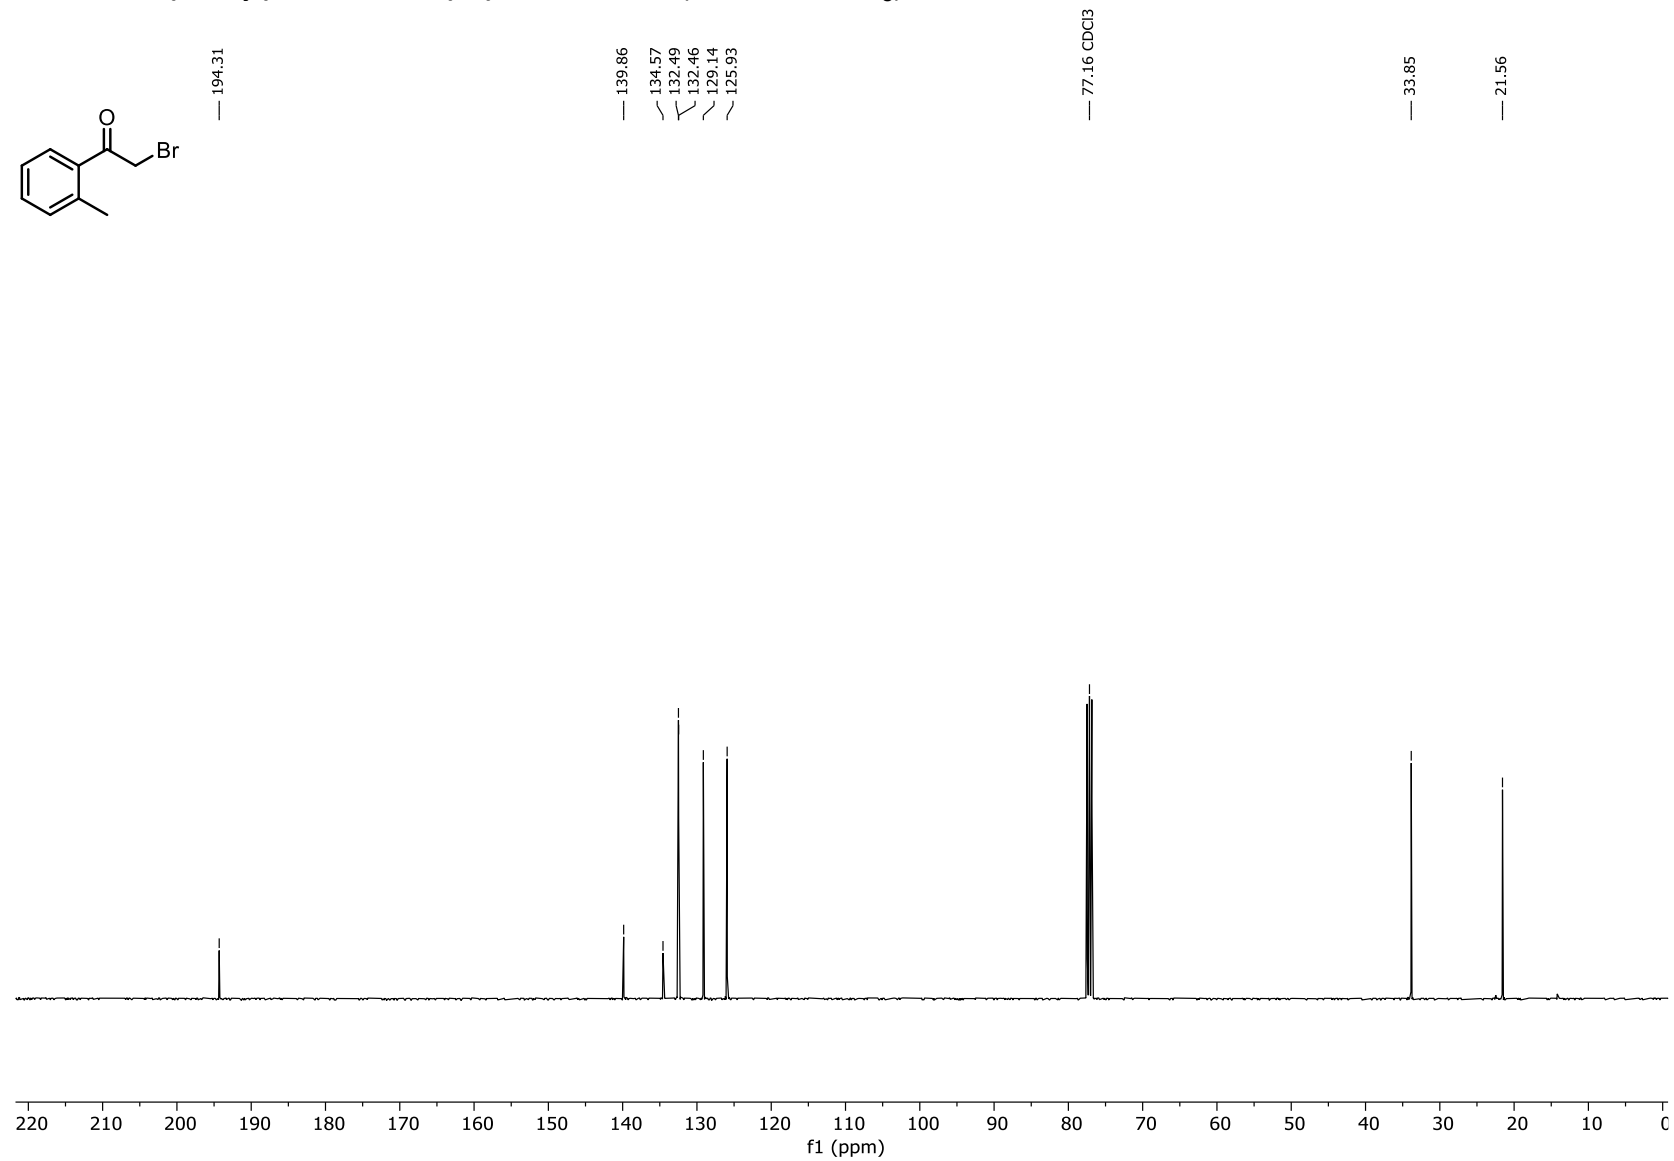

**1,4-Di-o-tolylbutane-1,4-dione (S10):**  $^1\text{H}$  NMR (300 MHz,  $\text{CDCl}_3$ )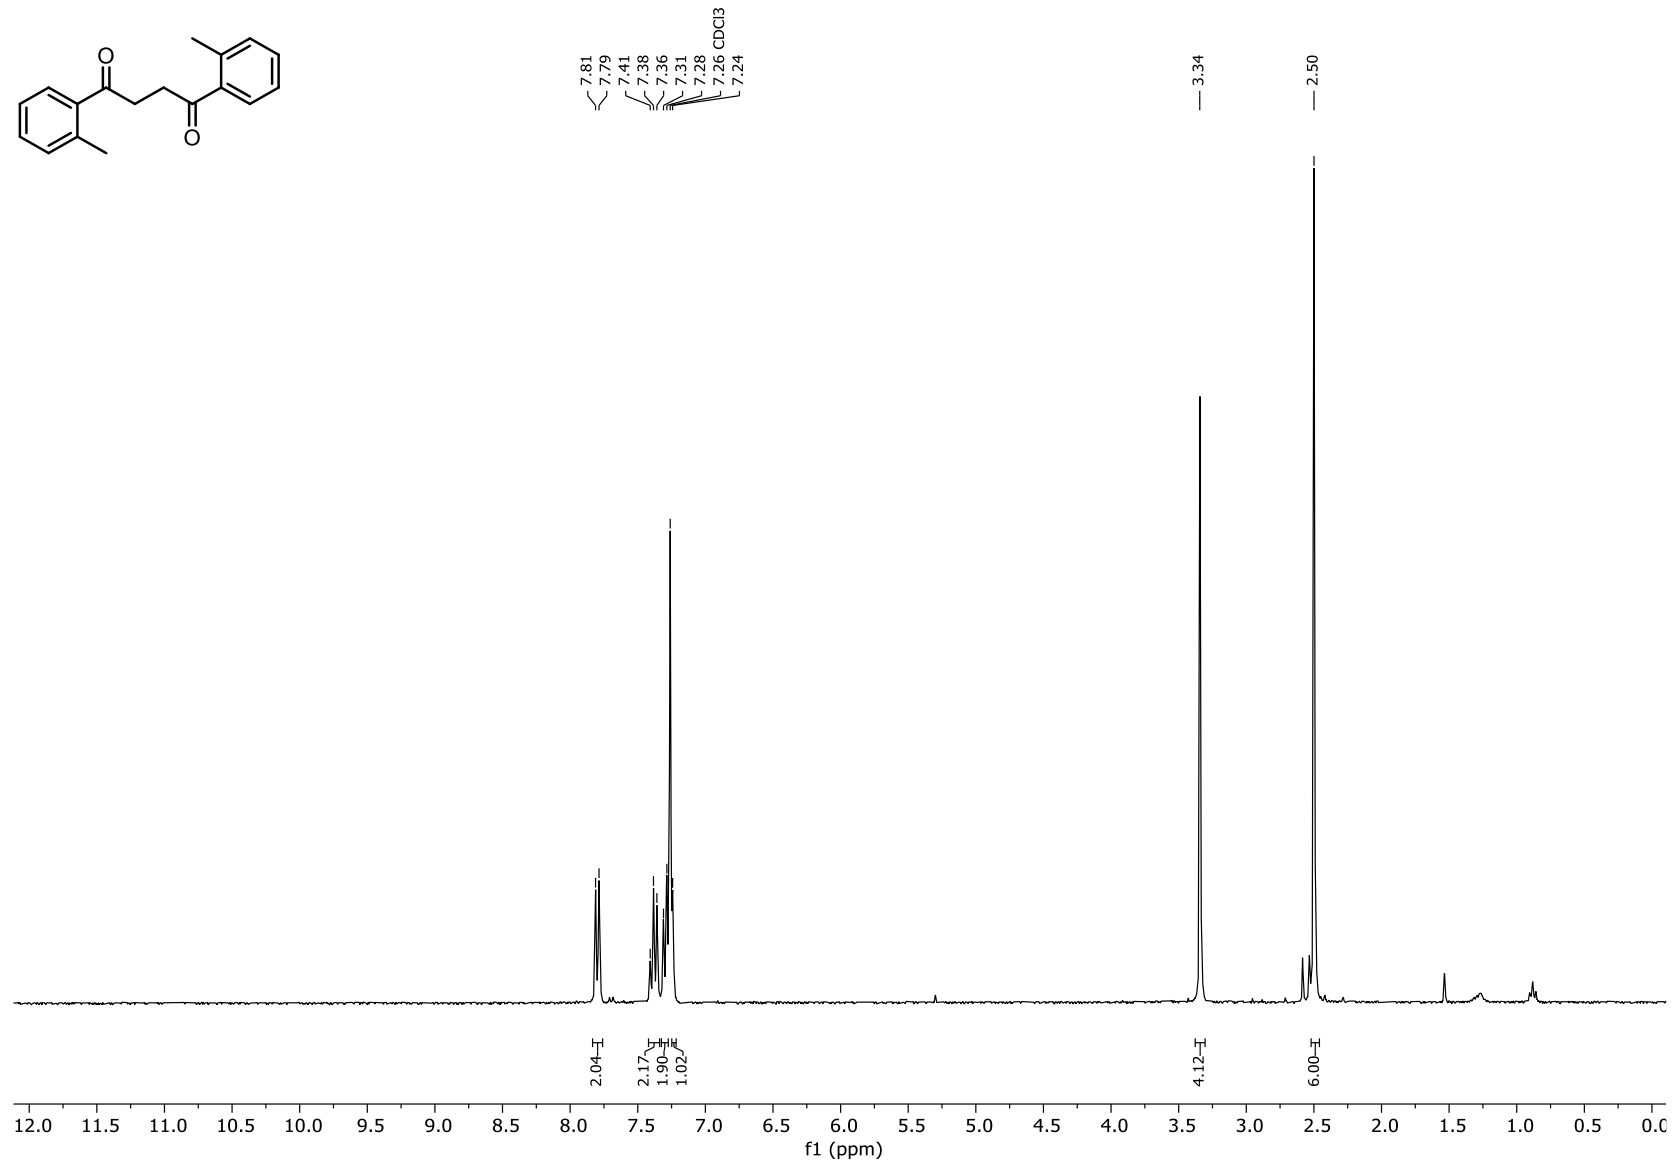

**1,4-Di-*o*-tolylbutane-1,4-dione (S10):**  $^{13}\text{C}\{^1\text{H}\}$  NMR (101 MHz,  $\text{CDCl}_3$ )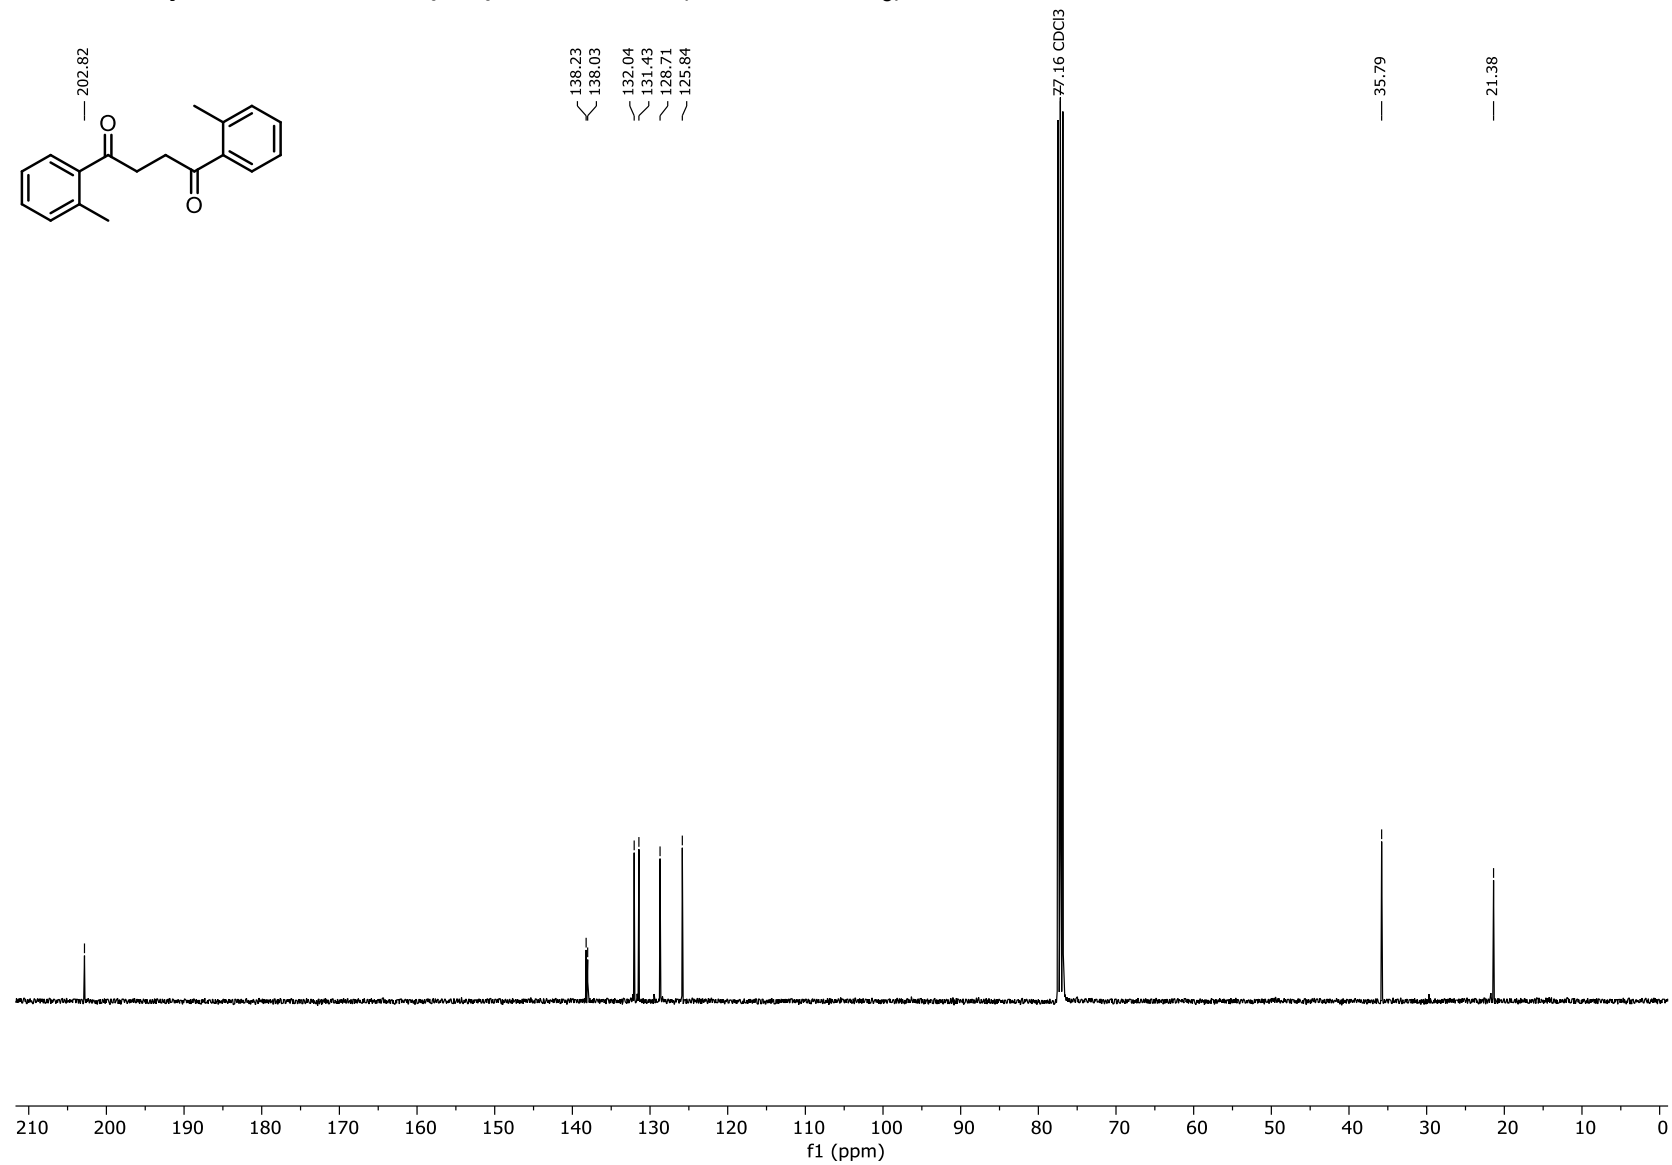

**2,2'-(Hexa-1,5-diene-2,5-diyl)bis(methylbenzene) (1k):**  $^1\text{H}$  NMR (300 MHz,  $\text{CDCl}_3$ )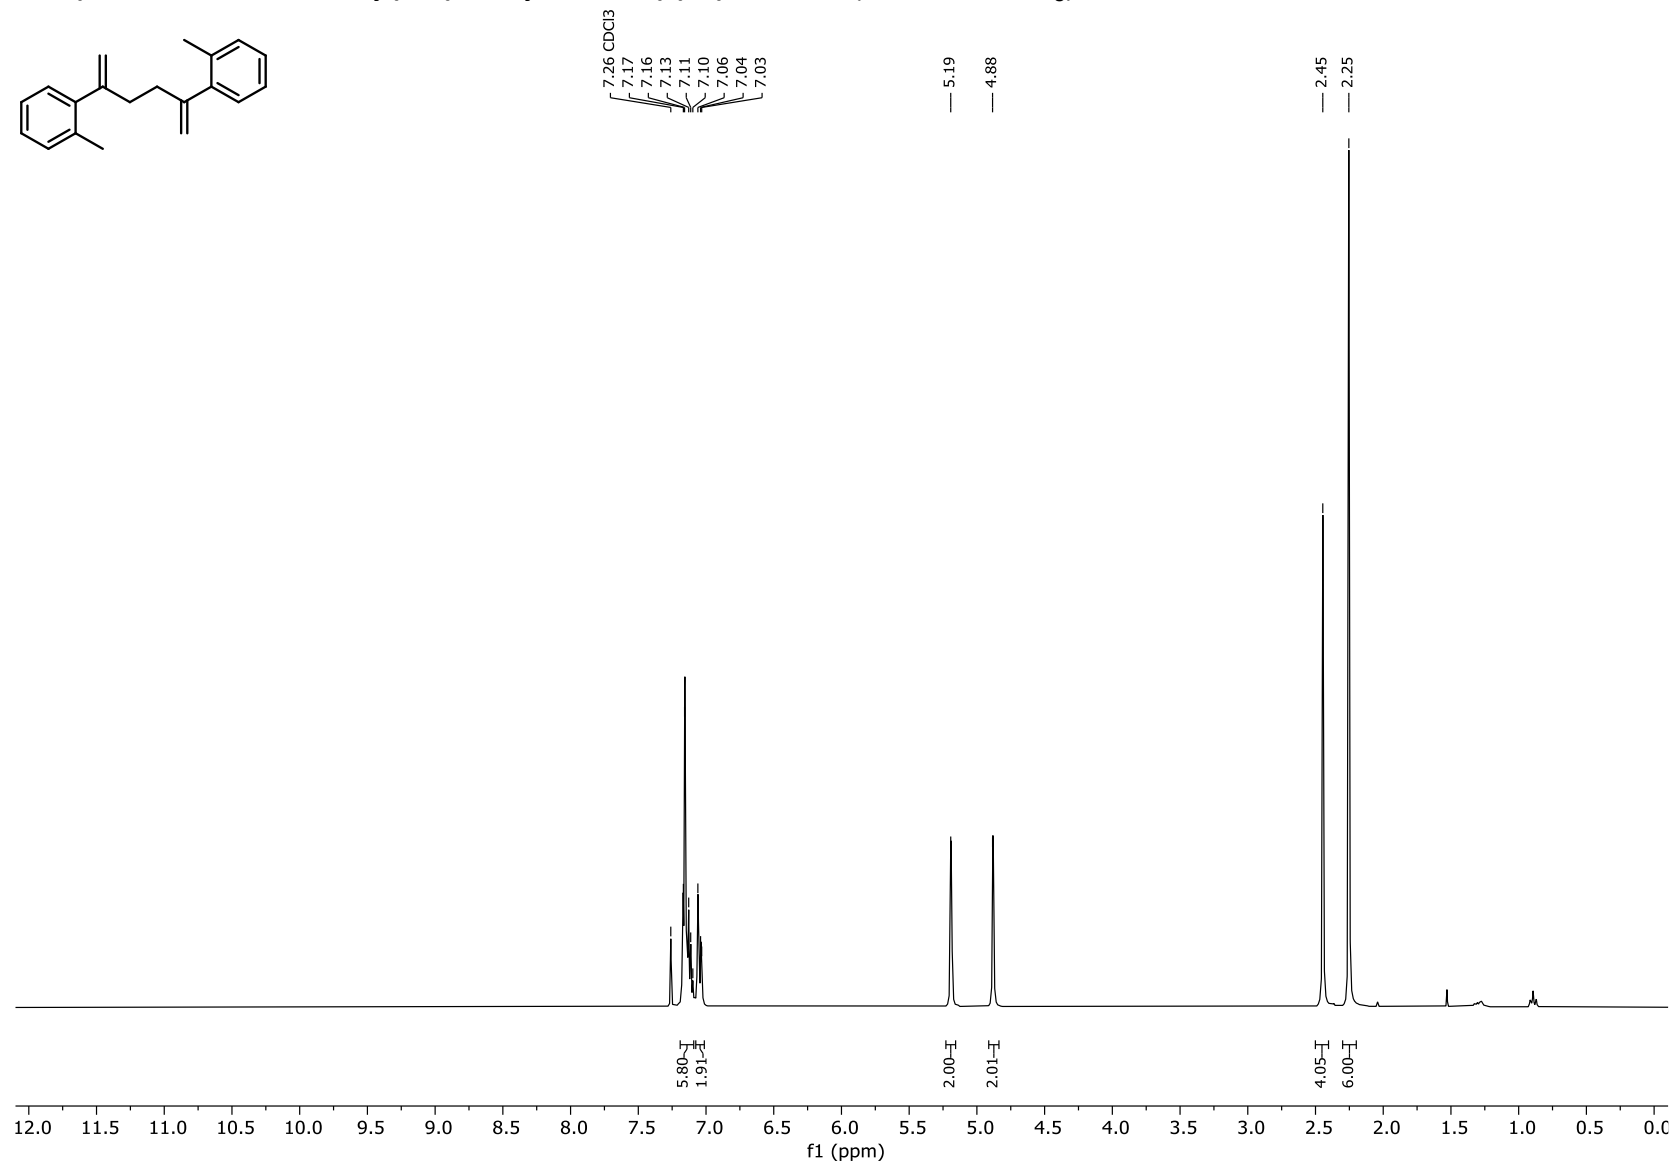

**2,2'-(Hexa-1,5-diene-2,5-diyl)bis(methylbenzene) (1k):**  $^{13}\text{C}\{^1\text{H}\}$  NMR (101 MHz,  $\text{CDCl}_3$ )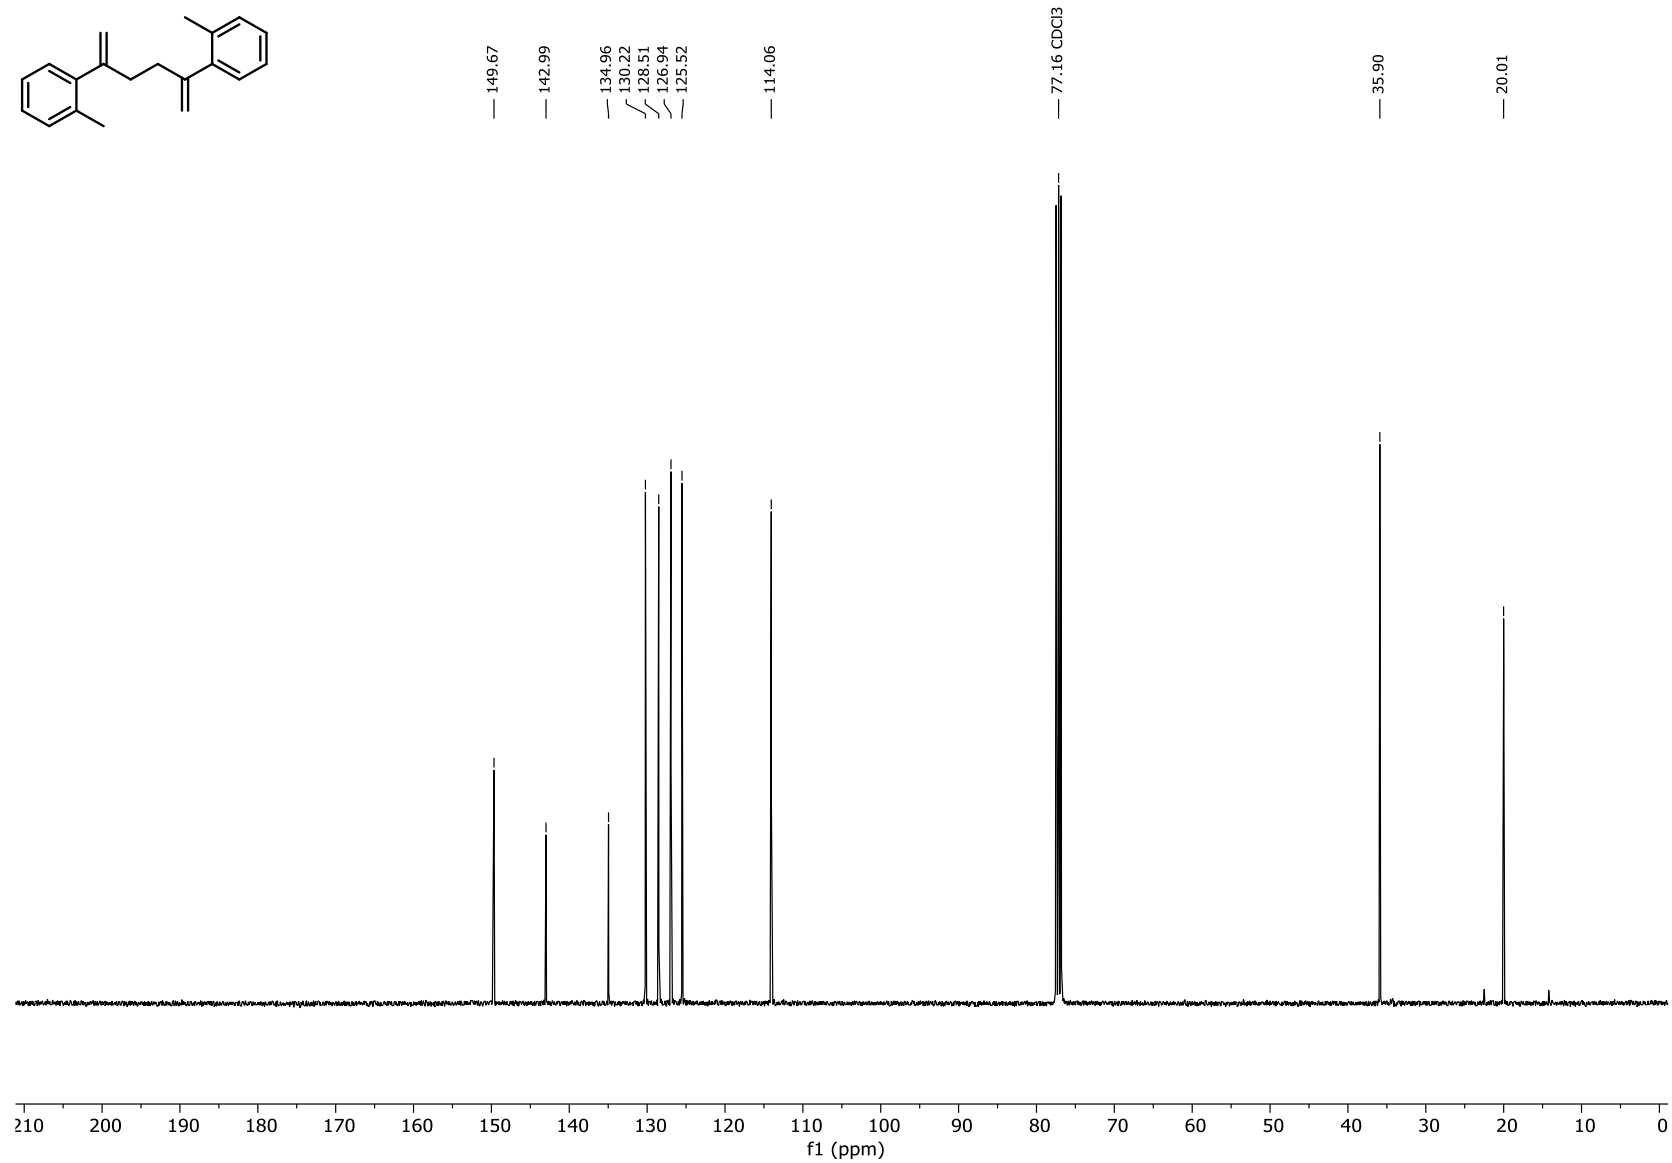



**1,4-Bis(4-methoxyphenyl)butane-1,4-dione (S11):**  $^1\text{H}$  NMR (300 MHz,  $\text{CDCl}_3$ )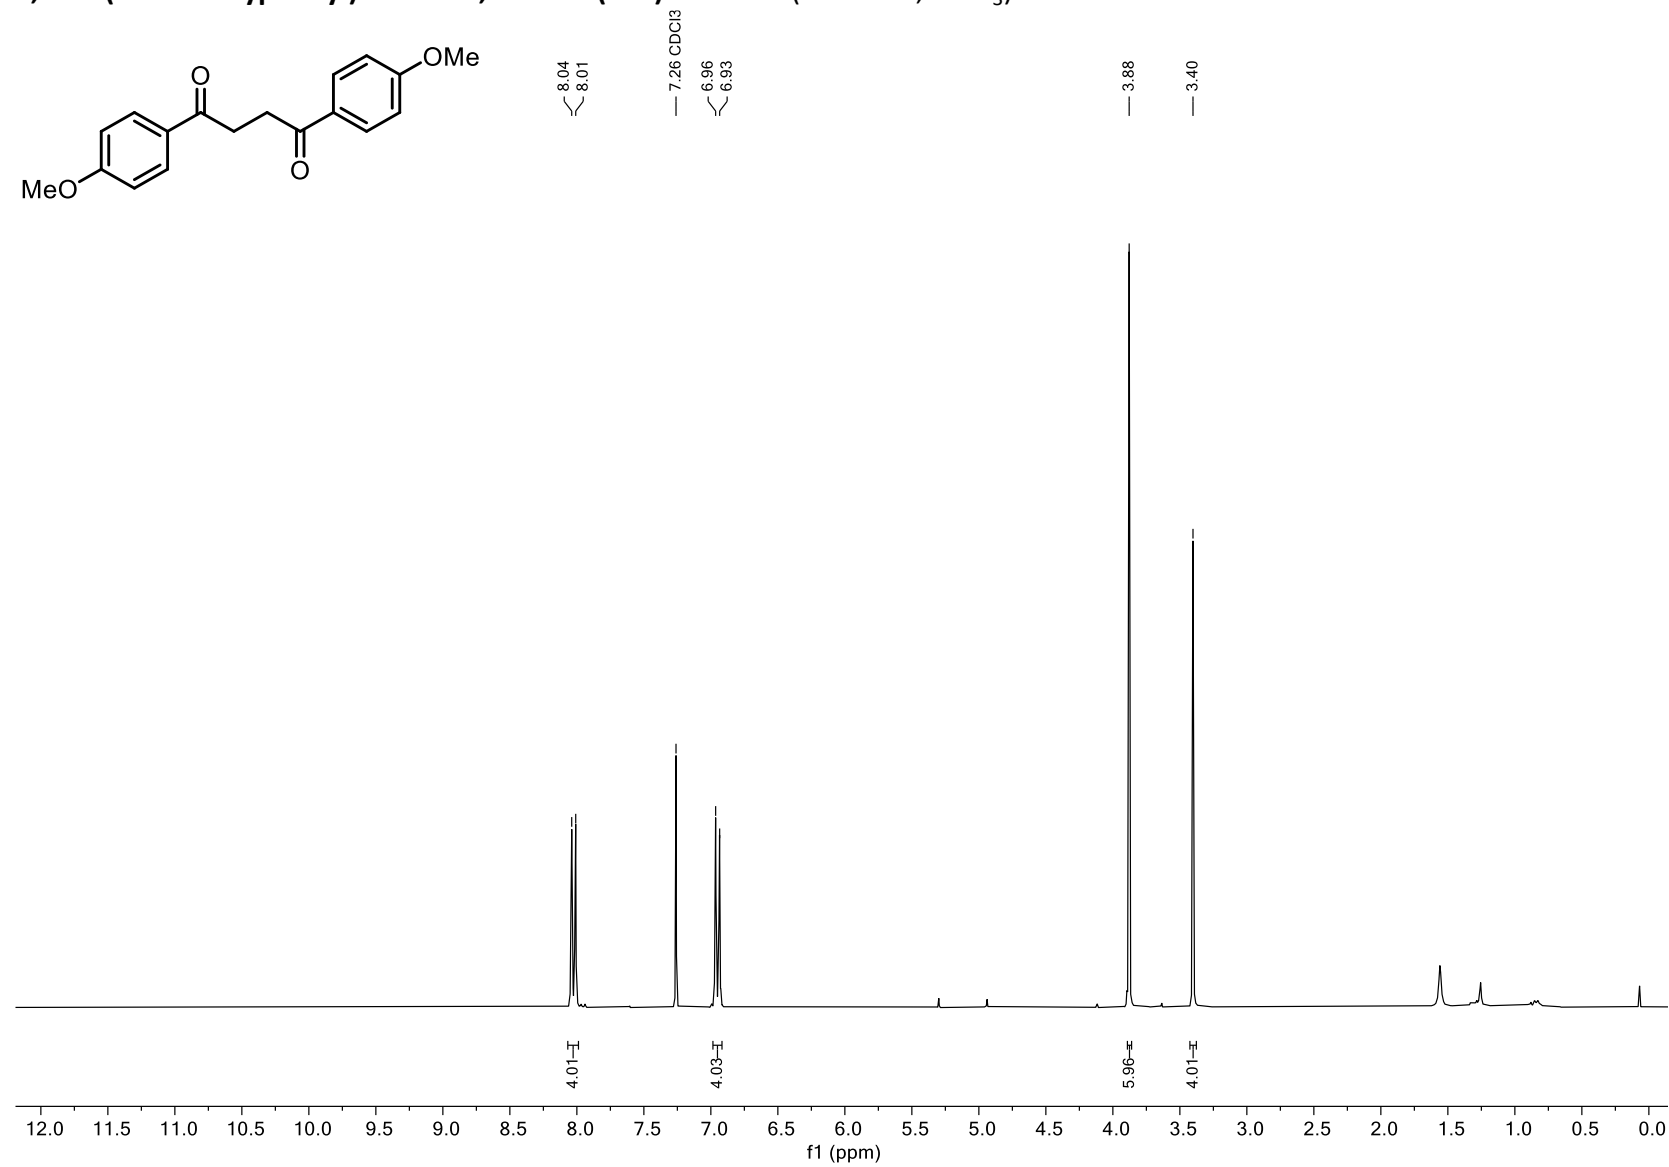

**1,4-Bis(4-methoxyphenyl)butane-1,4-dione (S11):**  $^{13}\text{C}\{^1\text{H}\}$  NMR (101 MHz,  $\text{CDCl}_3$ )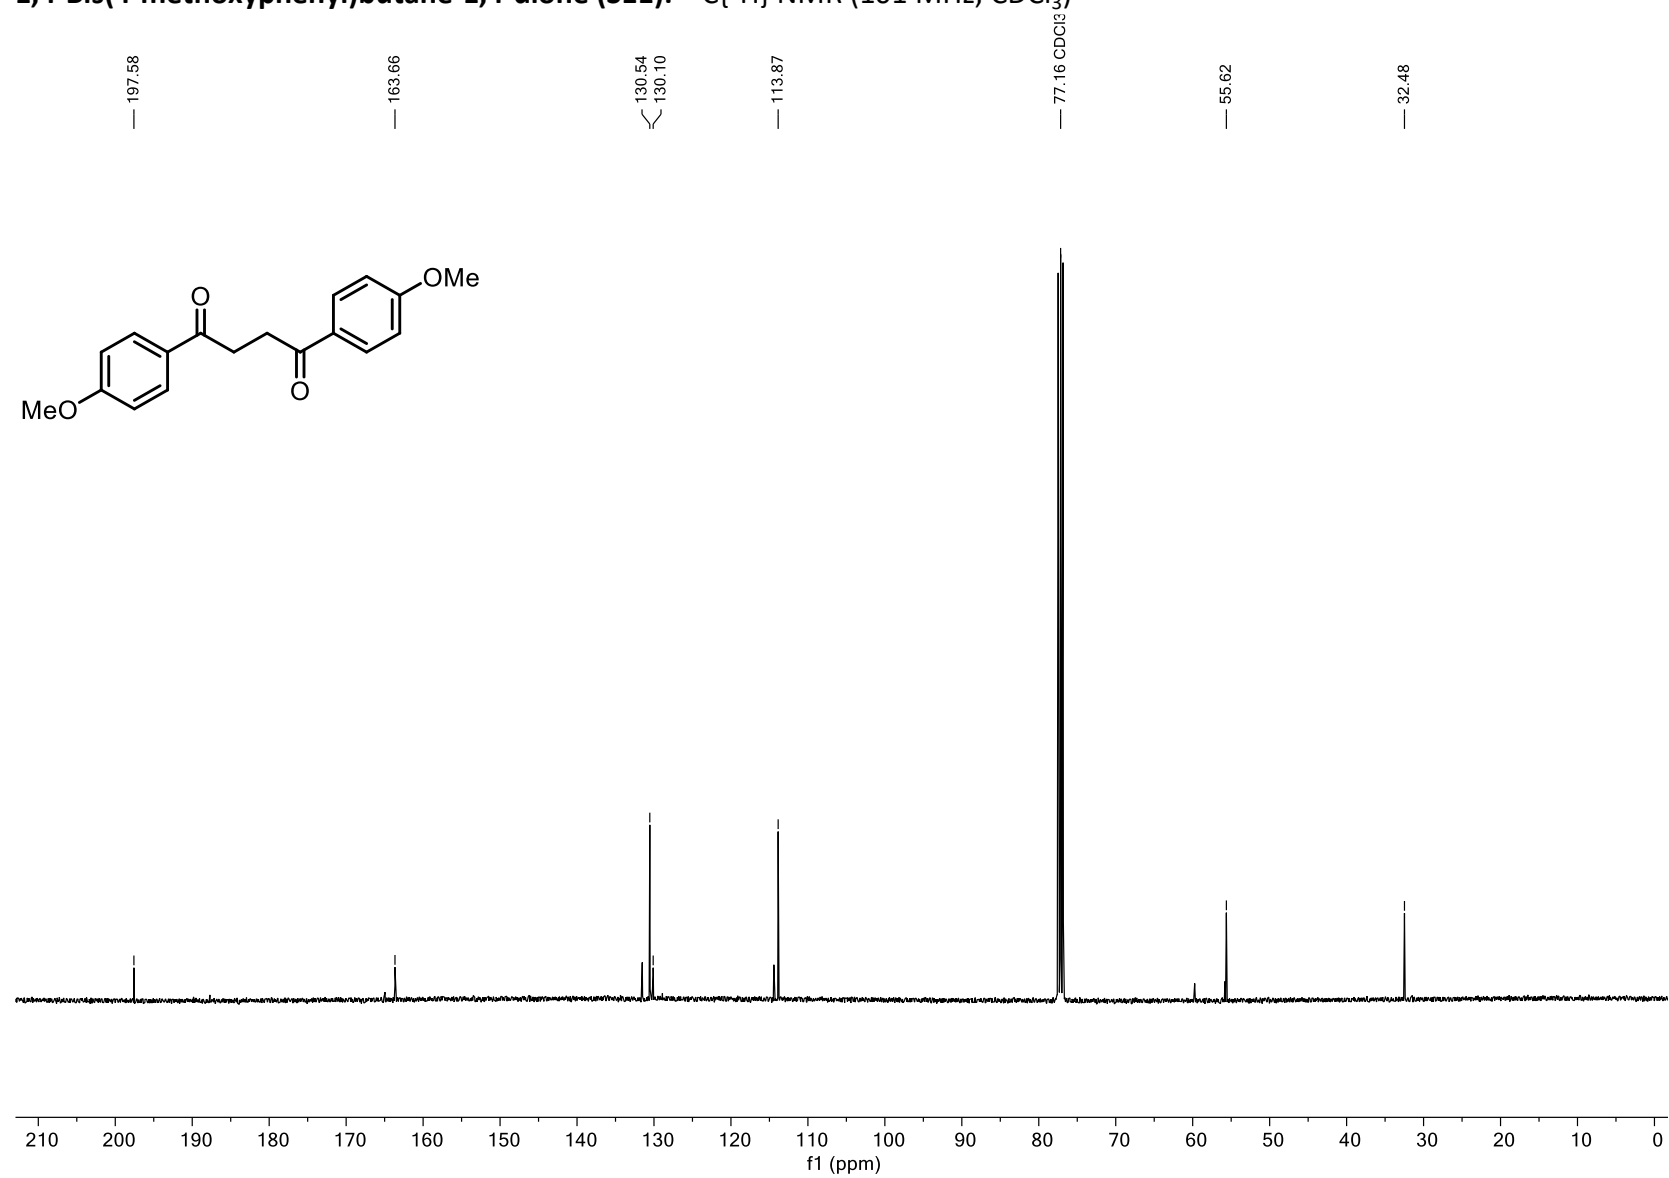

**4,4'-(Hexa-1,5-diene-2,5-diyl)bis(methoxybenzene) (1):**  $^1\text{H}$  NMR (300 MHz,  $\text{CDCl}_3$ )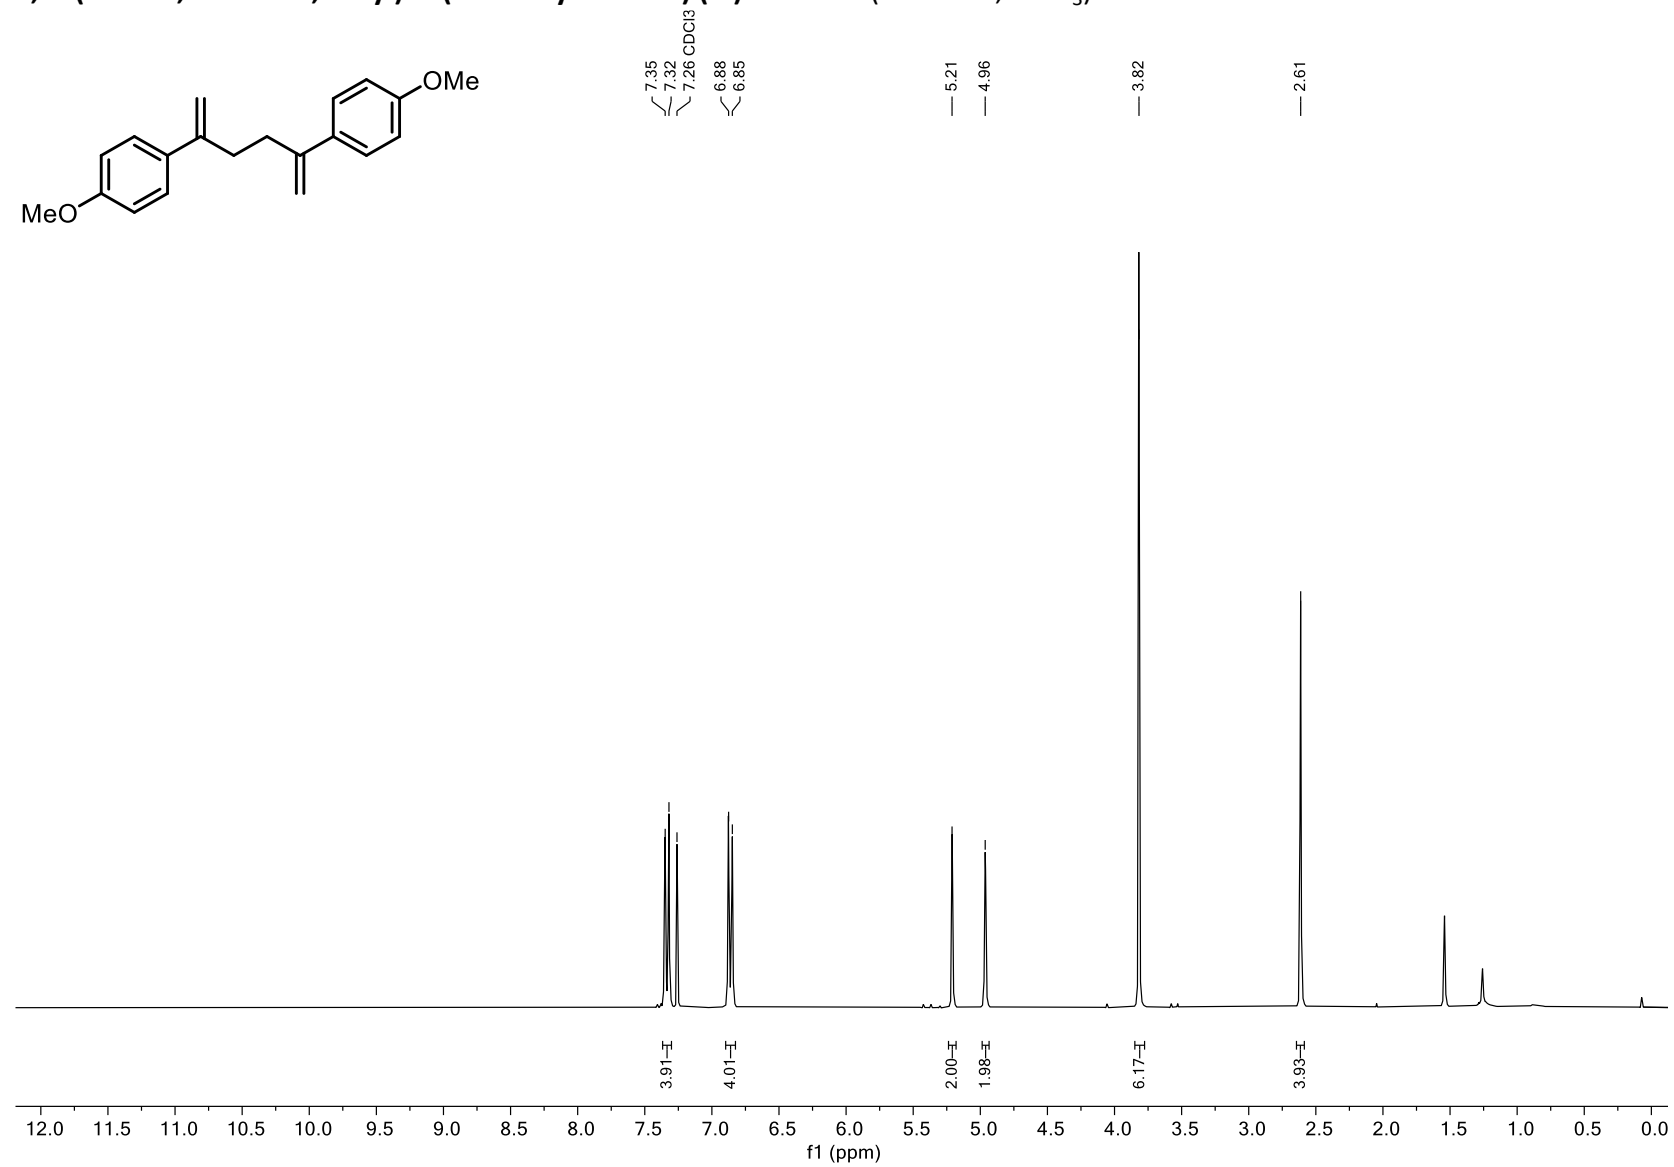

**4,4'-(Hexa-1,5-diene-2,5-diyl)bis(methoxybenzene) (1):**  $^{13}\text{C}\{^1\text{H}\}$  NMR (101 MHz,  $\text{CDCl}_3$ )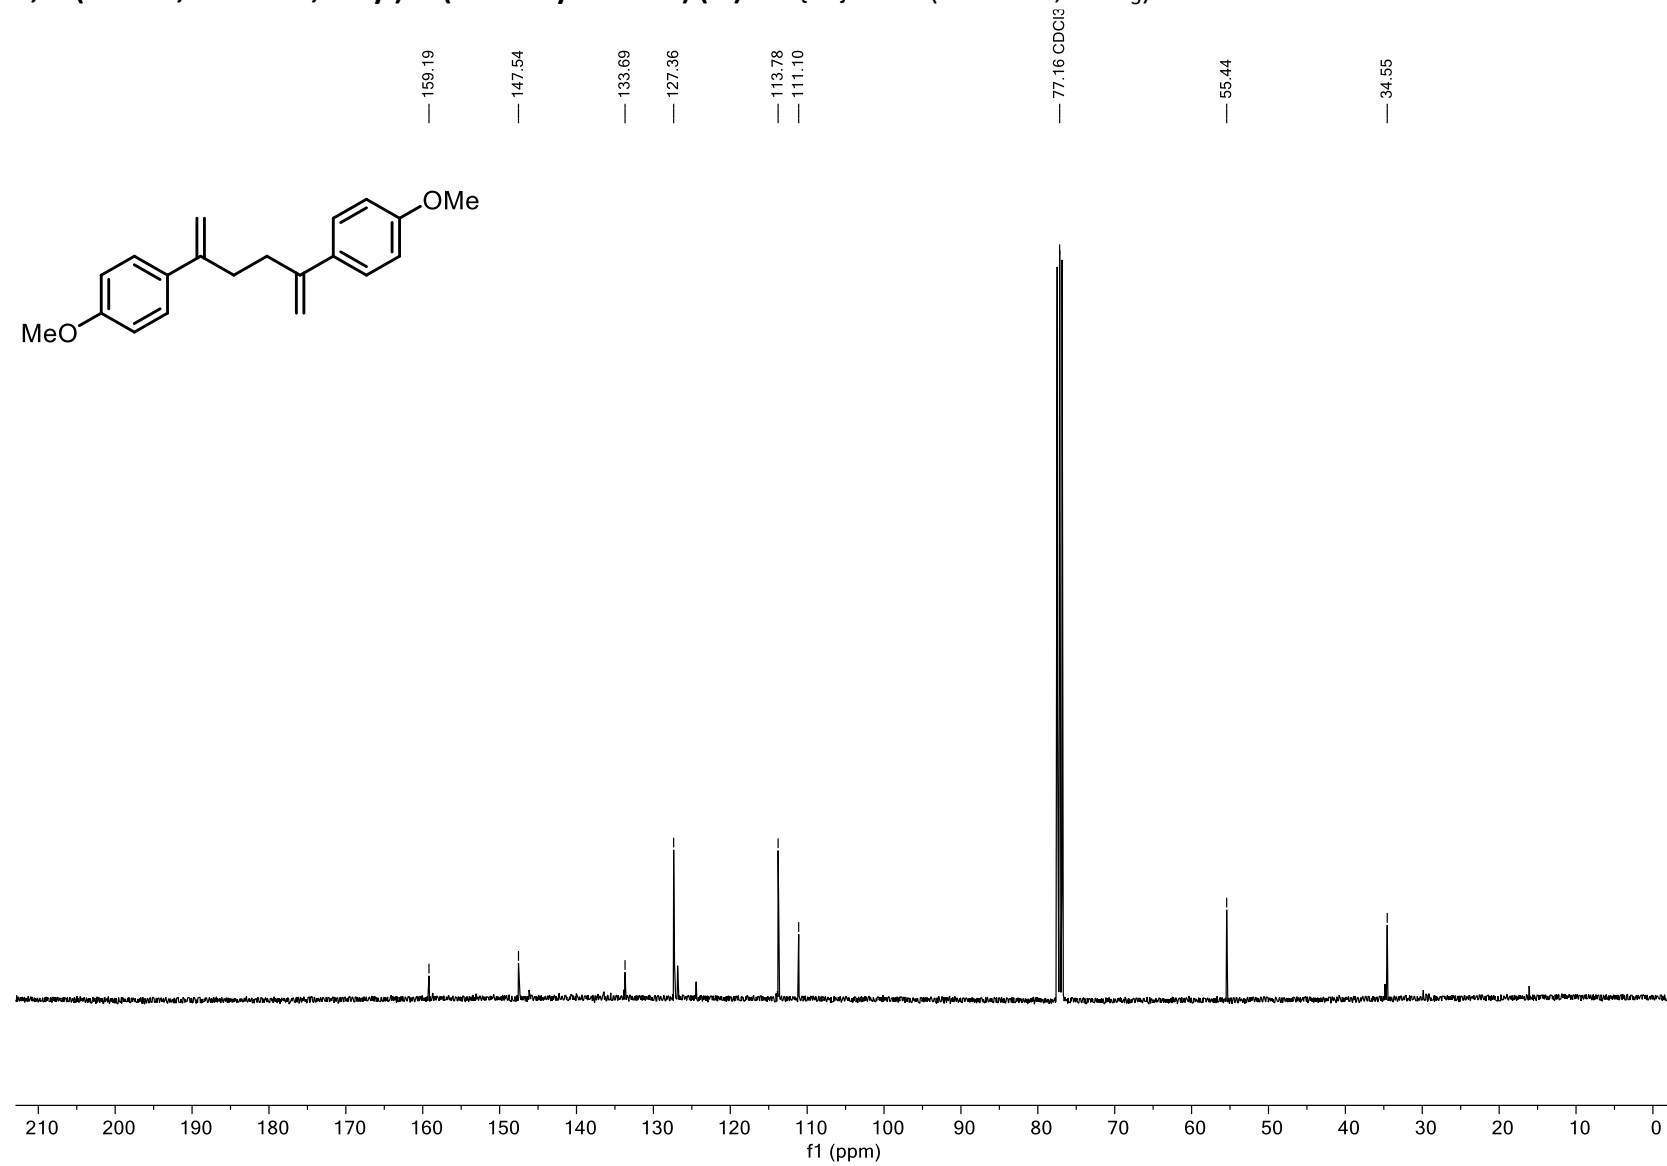

**1,4-Di(pyridin-2-yl)butane-1,4-dione (S12):  $^1\text{H}$  NMR (300 MHz,  $\text{CDCl}_3$ )**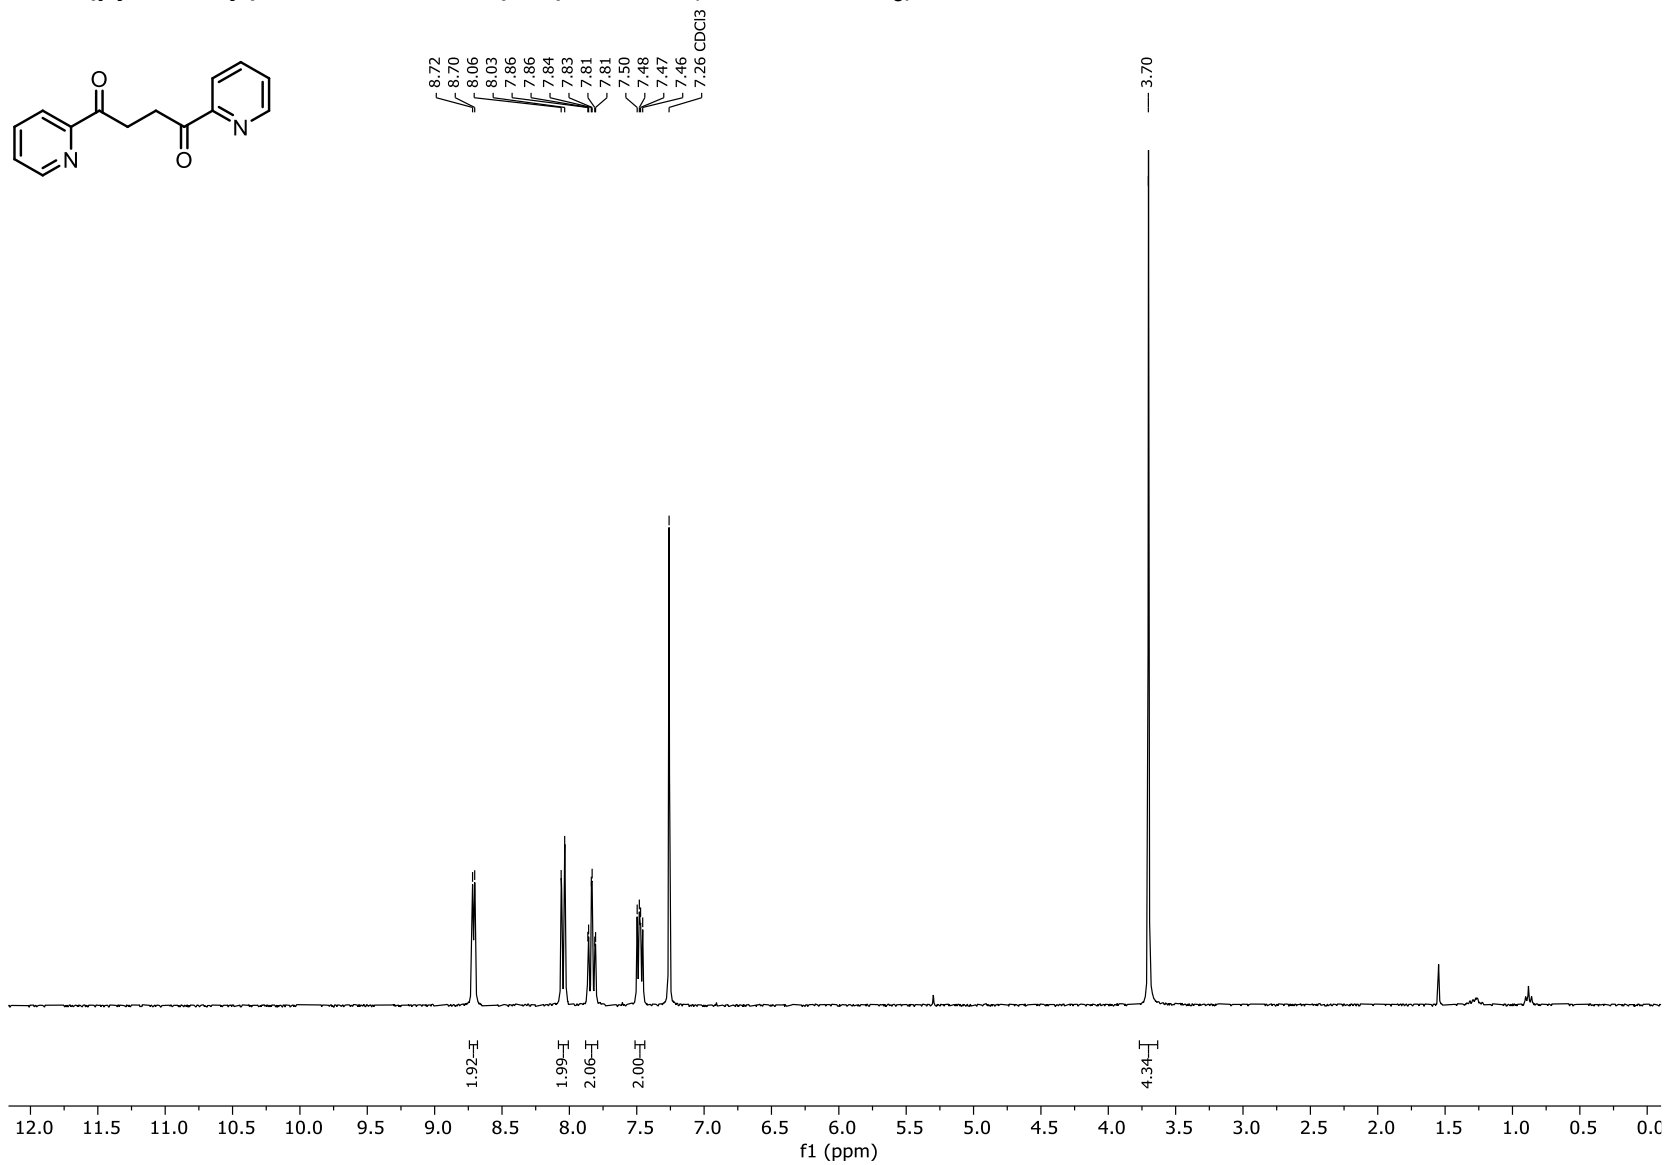

**1,4-Di(pyridin-2-yl)butane-1,4-dione (S12):**  $^{13}\text{C}\{^1\text{H}\}$  NMR (101 MHz,  $\text{CDCl}_3$ )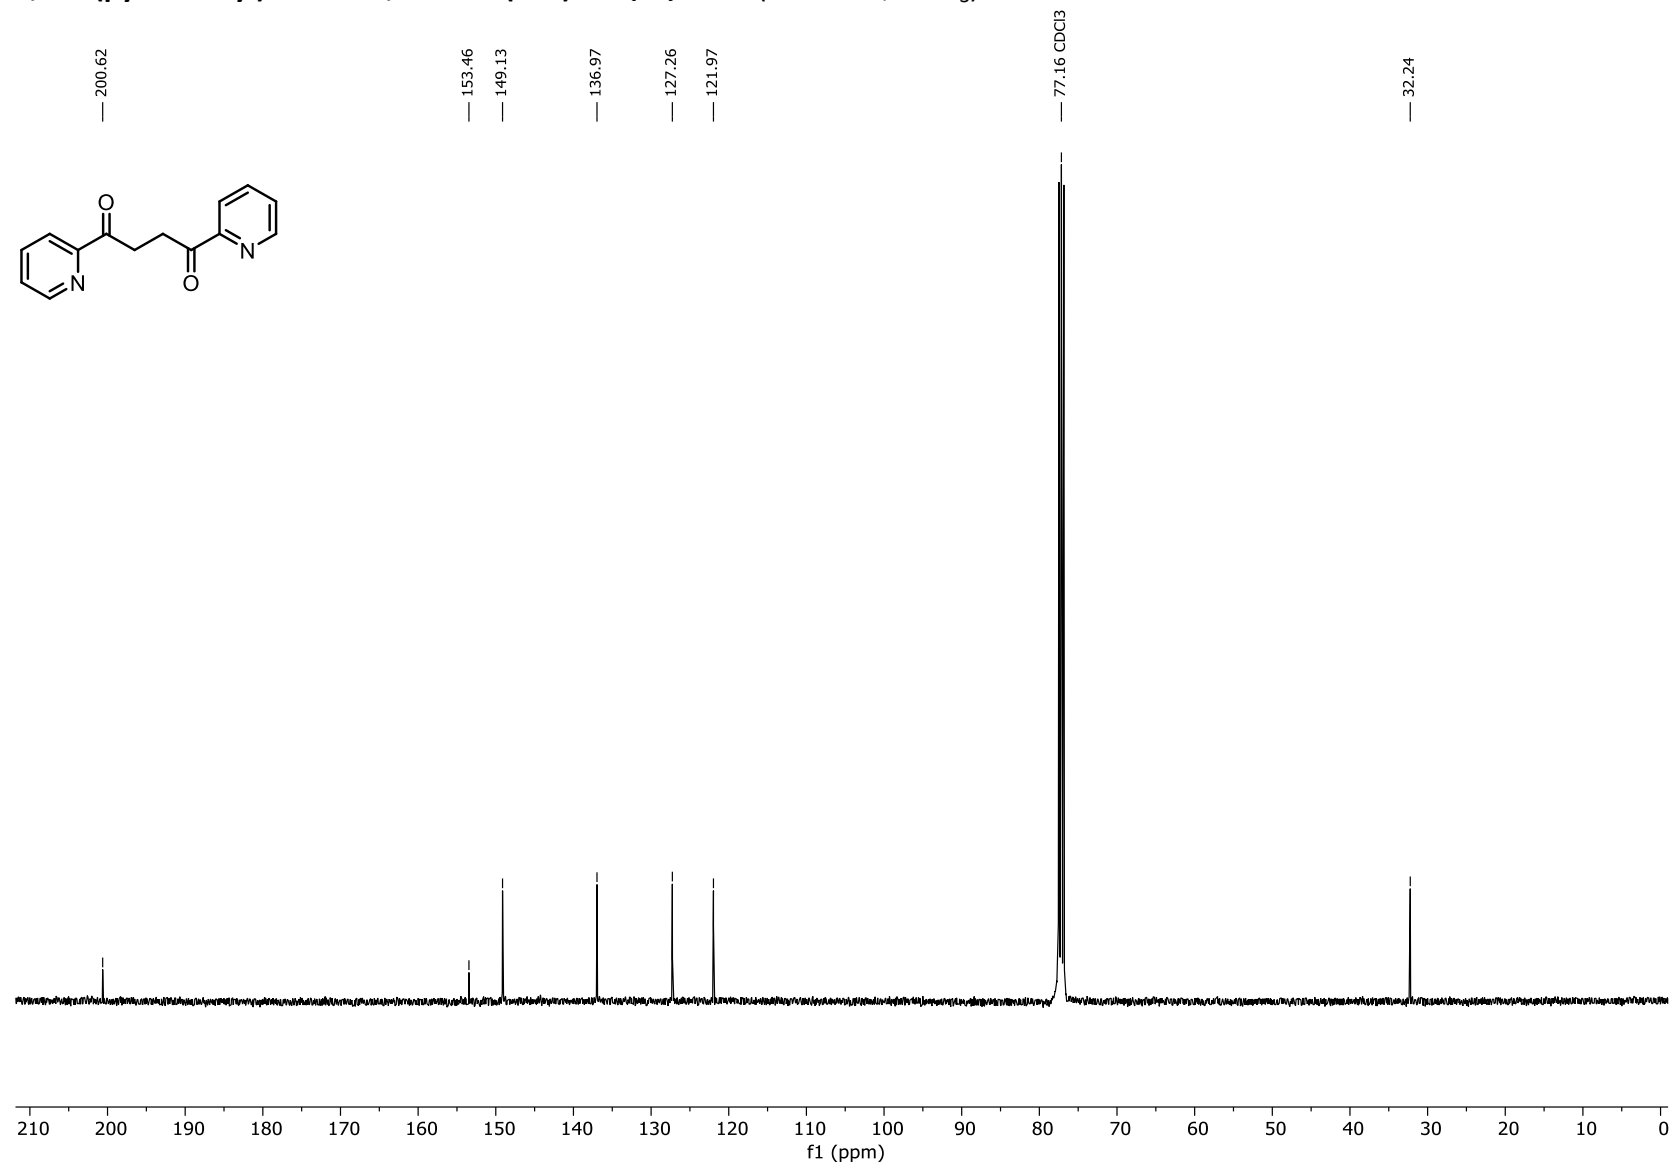

**2,2'-(Hexa-1,5-diene-2,5-diyl)dipyridine (1m):  $^1\text{H}$  NMR (300 MHz,  $\text{CDCl}_3$ )**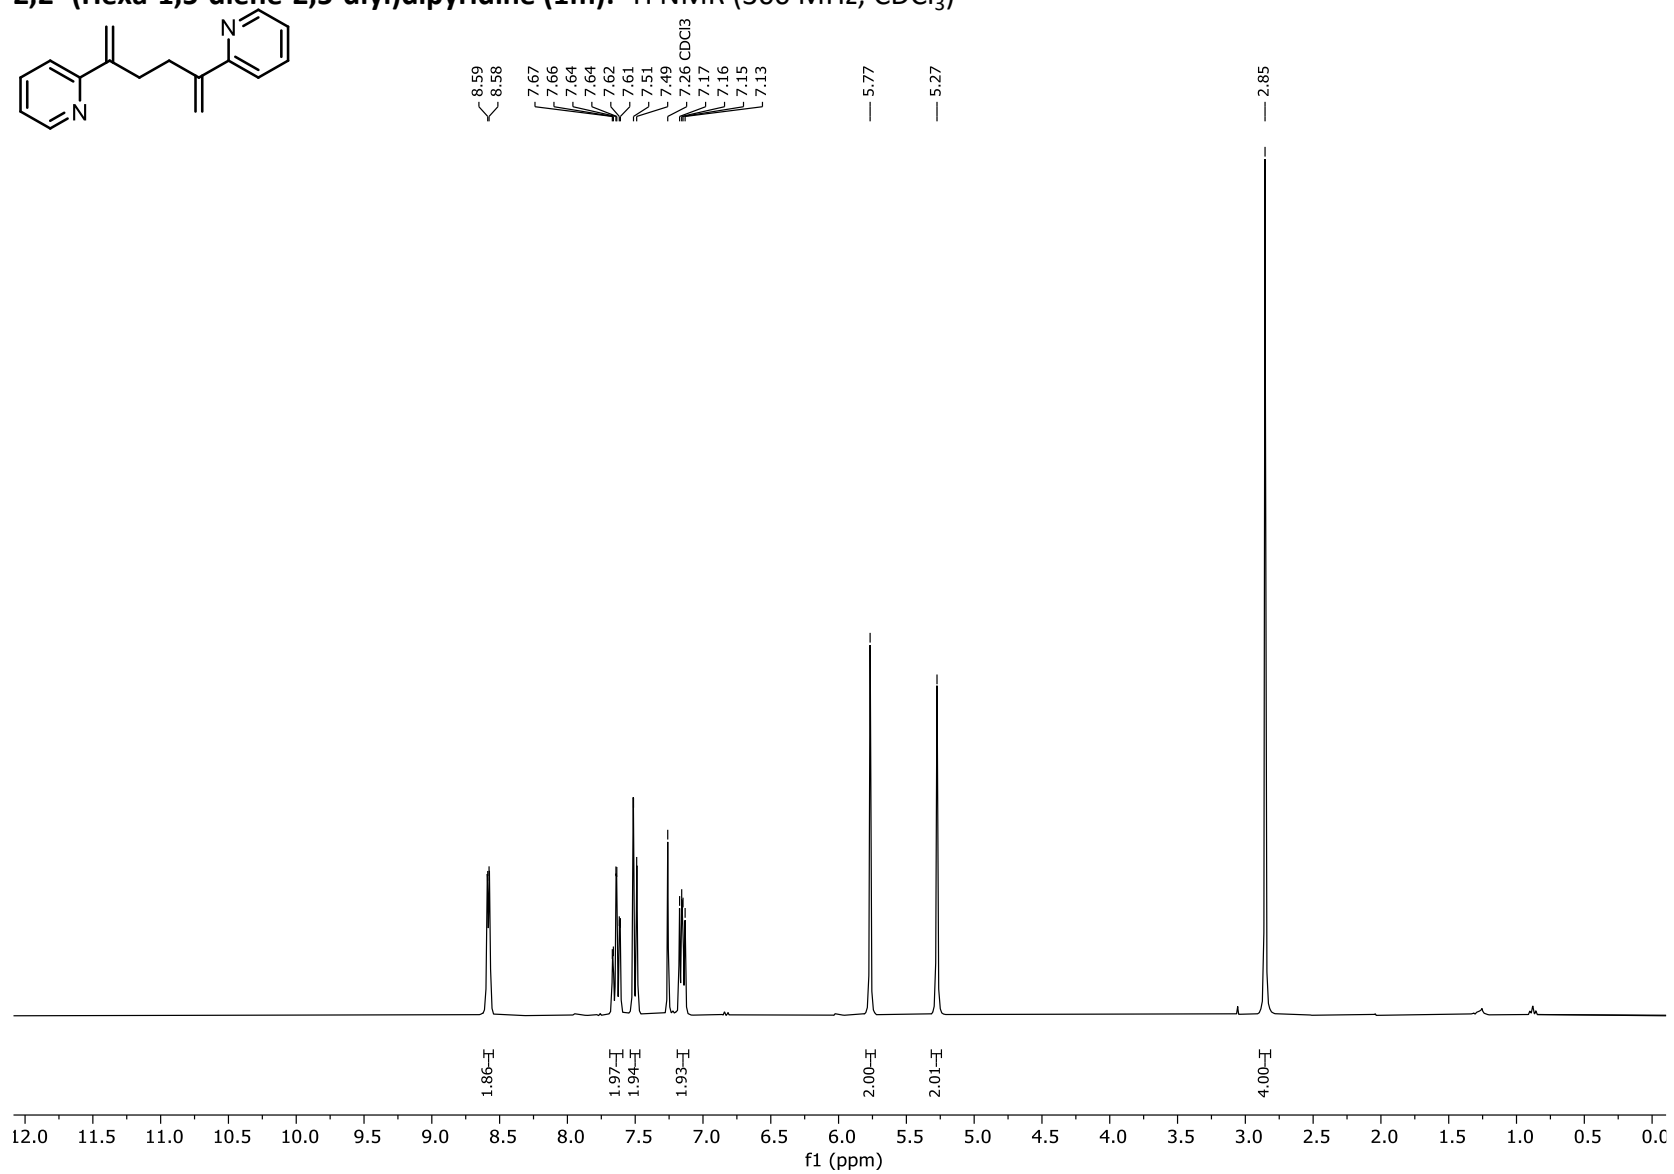

**2,2'-(Hexa-1,5-diene-2,5-diyl)dipyridine (1m):**  $^{13}\text{C}\{^1\text{H}\}$  NMR (101 MHz,  $\text{CDCl}_3$ )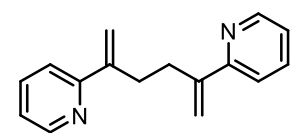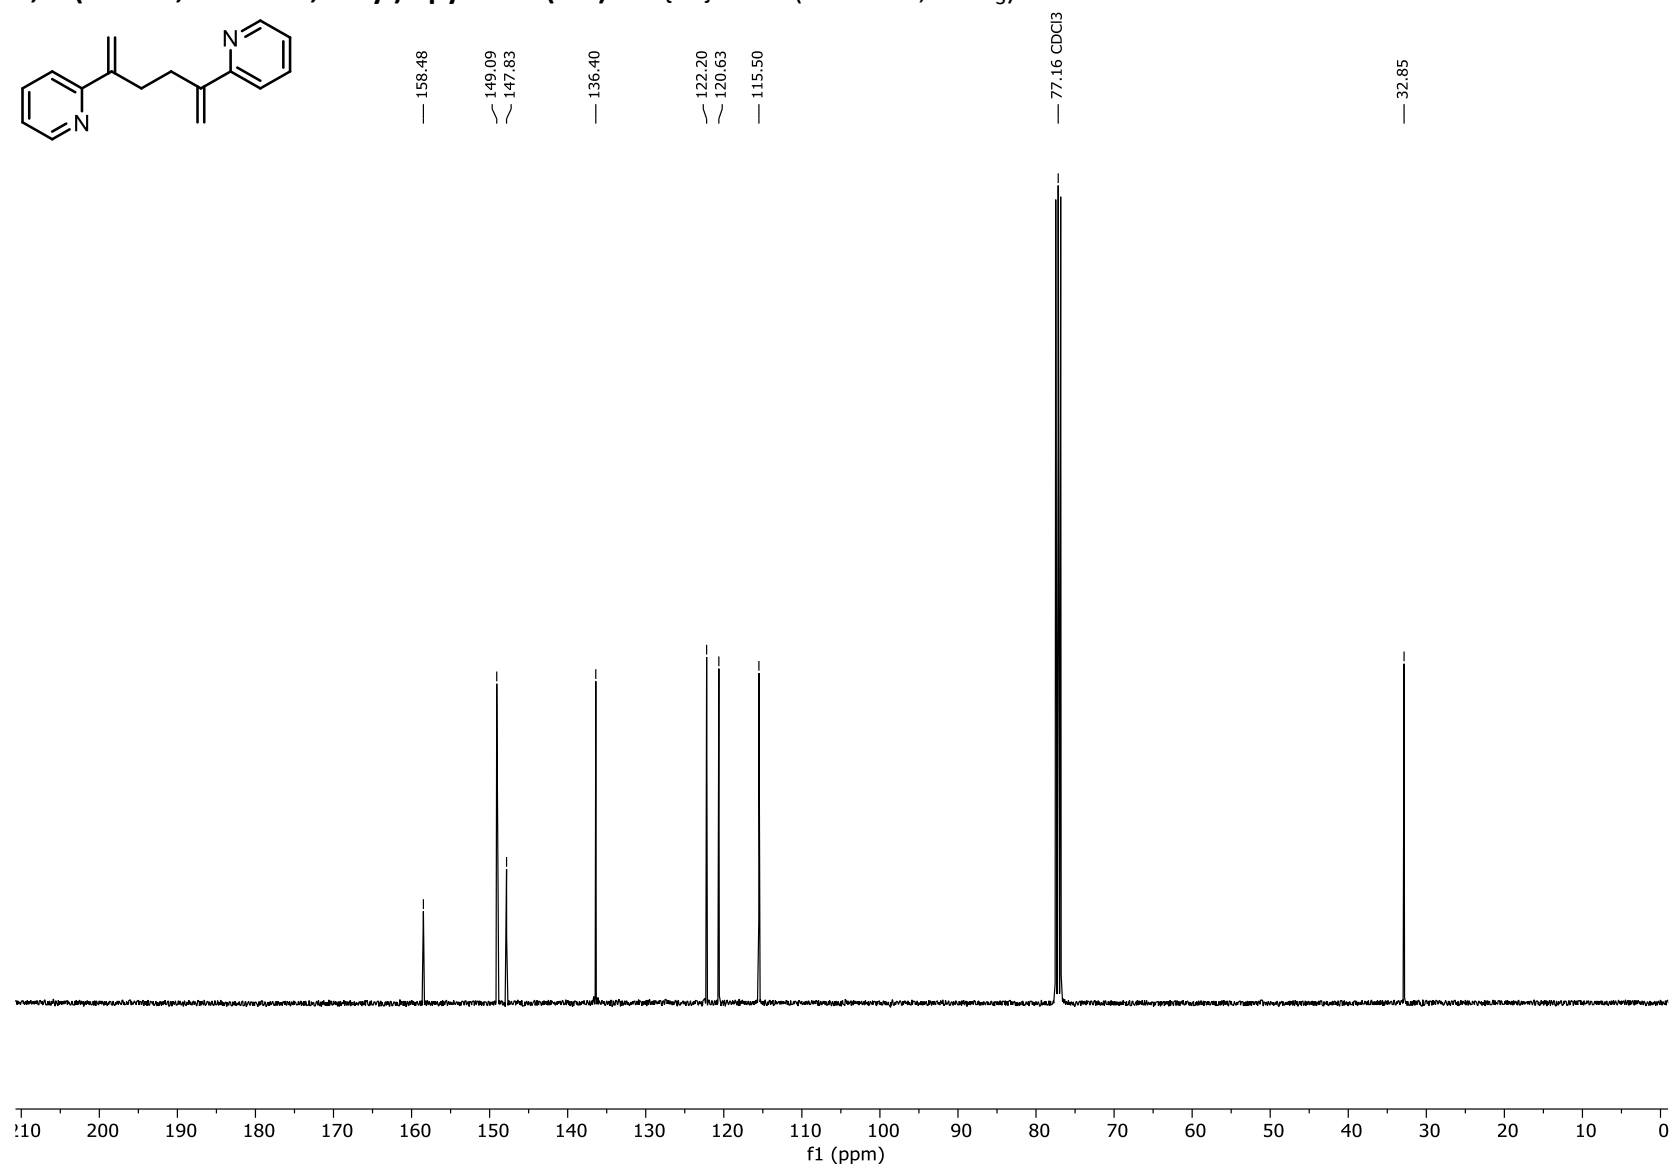



**1,4-Di(naphthalen-2-yl)butane-1,4-dione (S13):**  $^1\text{H}$  NMR (300 MHz,  $\text{CDCl}_3$ )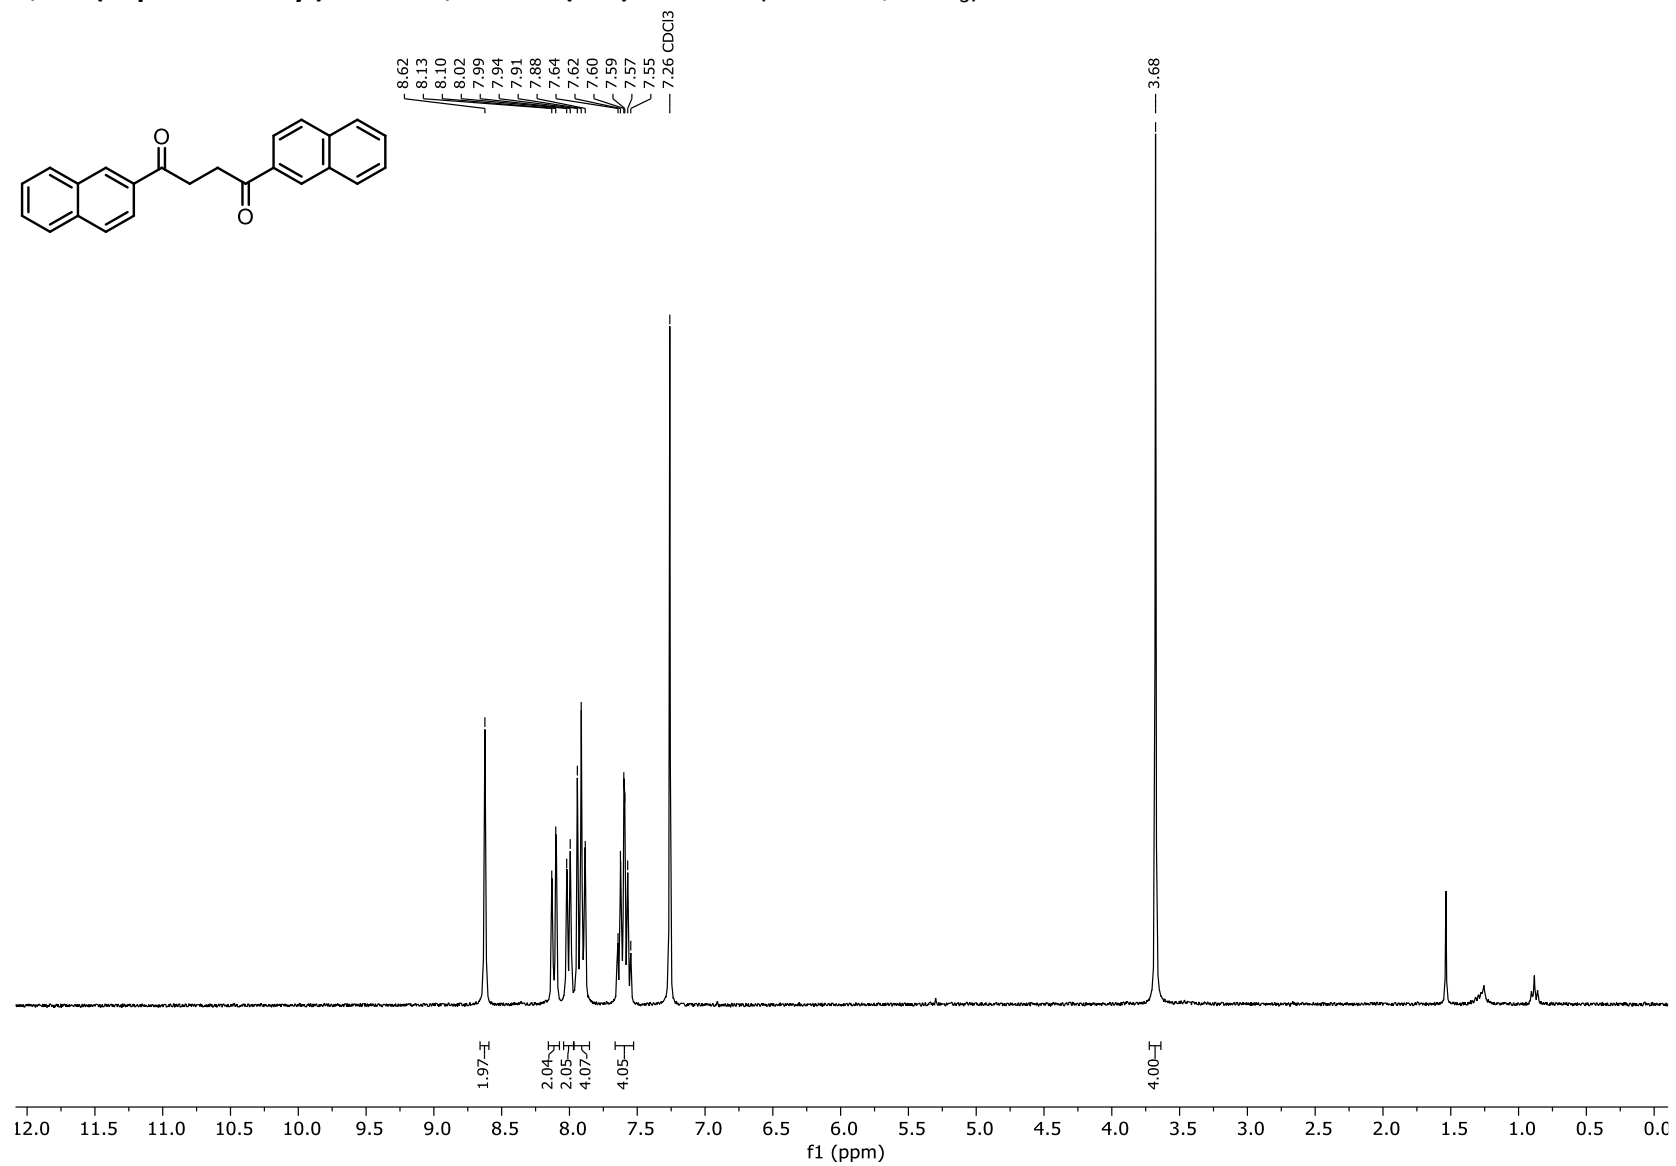

**1,4-Di(naphthalen-2-yl)butane-1,4-dione (S13):**  $^{13}\text{C}\{^1\text{H}\}$  NMR (101 MHz,  $\text{CDCl}_3$ )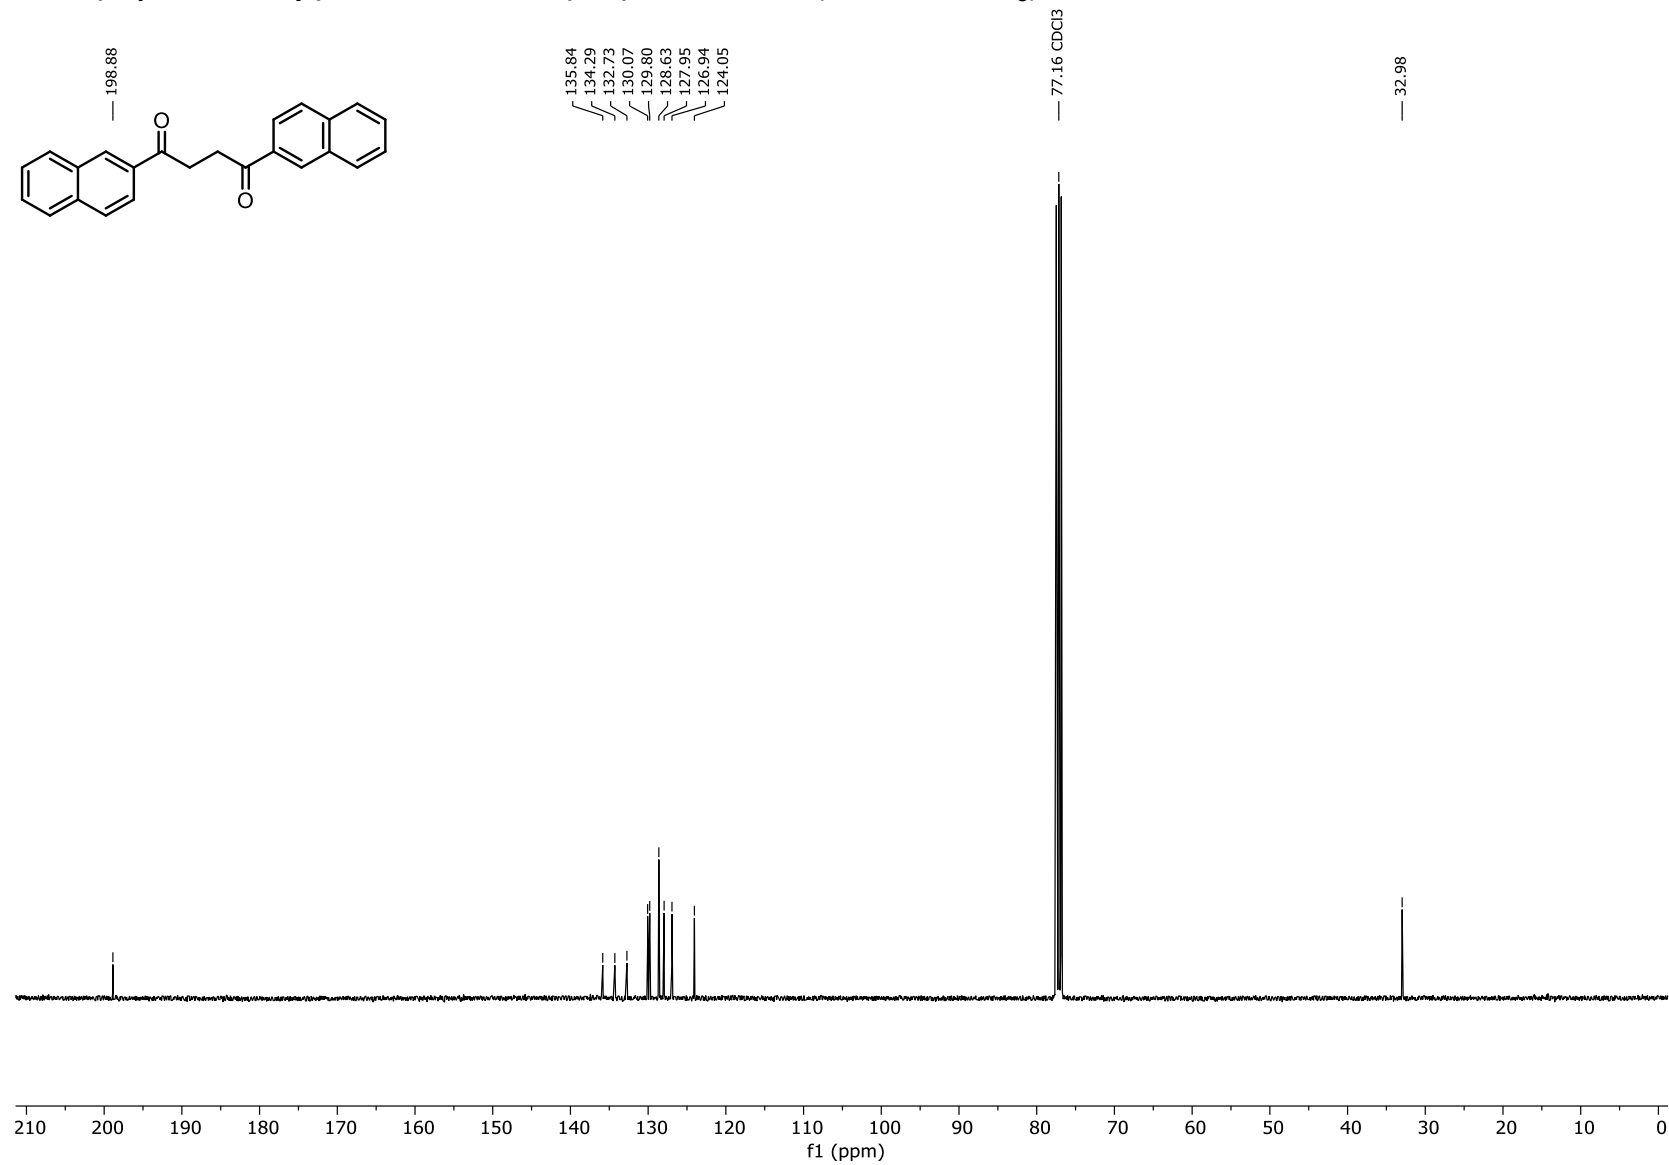

**2,2'-(Hexa-1,5-diene-2,5-diyl)dinaphthalene (1n):**  $^1\text{H}$  NMR (300 MHz,  $\text{CDCl}_3$ )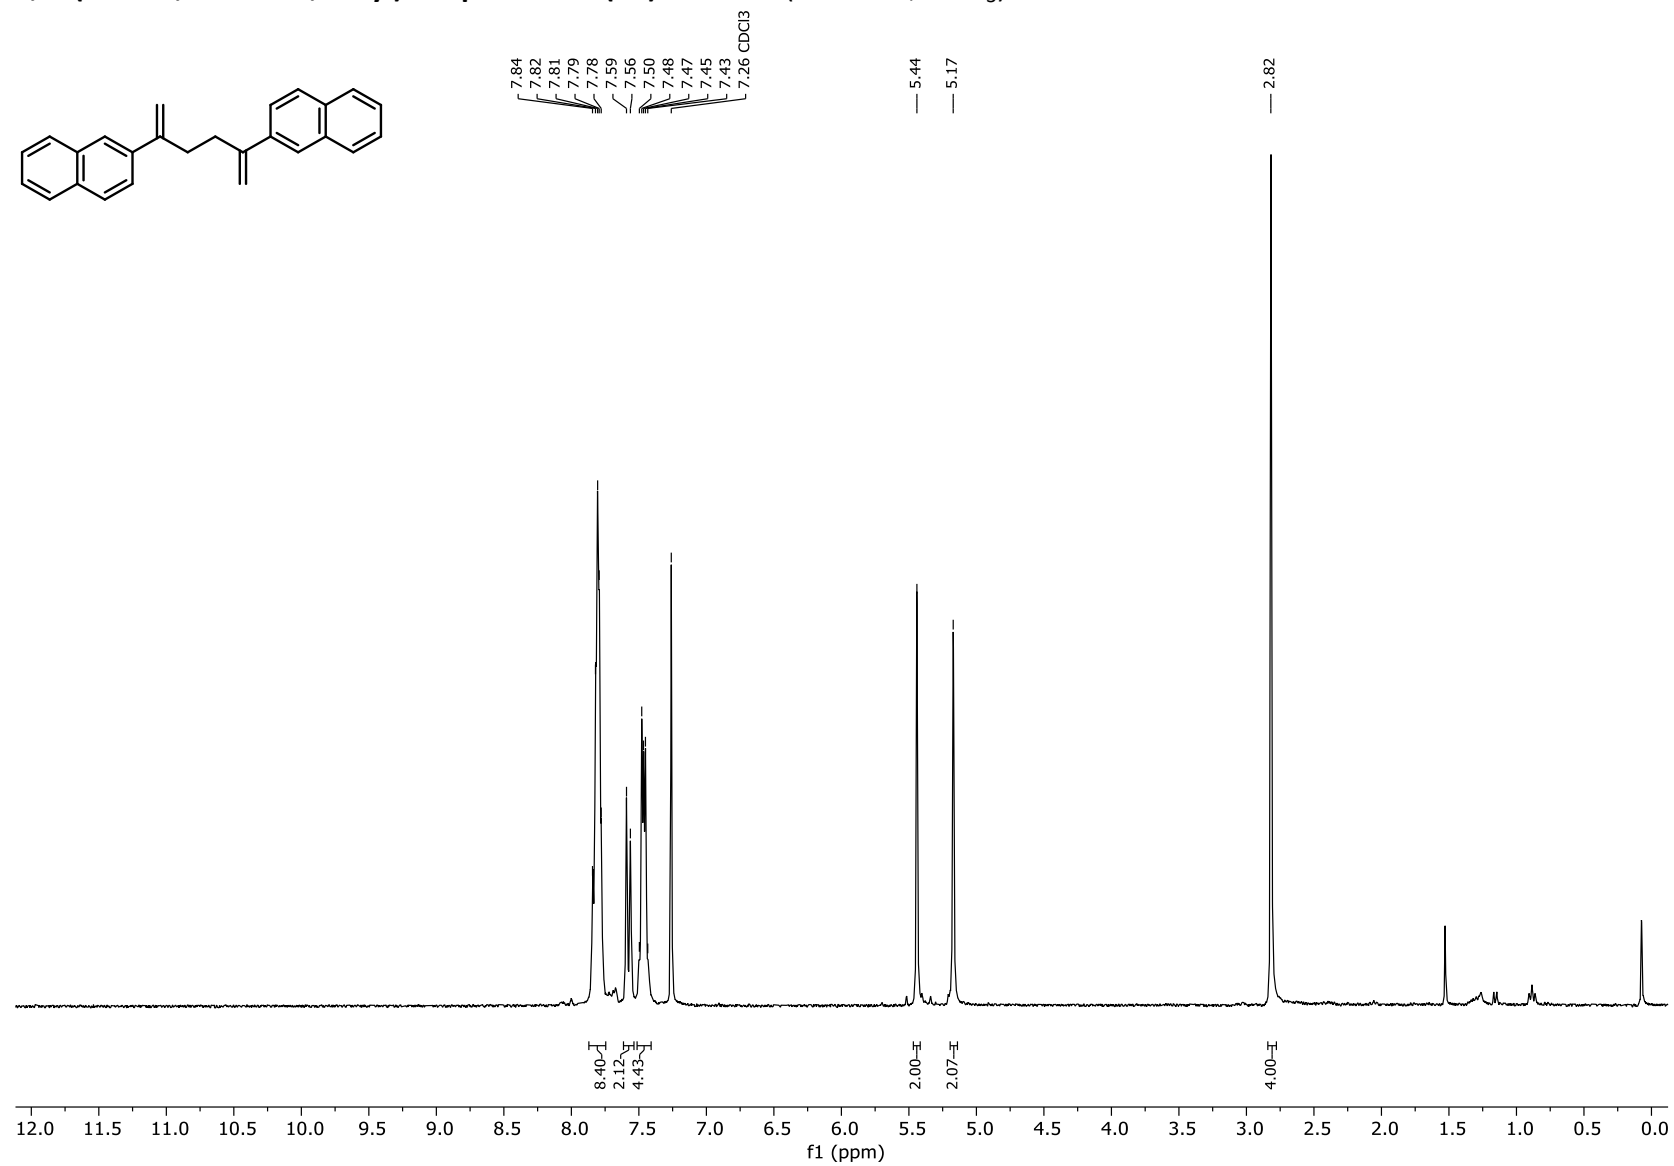

**2,2'-(Hexa-1,5-diene-2,5-diyl)dinaphthalene (1n):**  $^{13}\text{C}\{^1\text{H}\}$  NMR (101 MHz,  $\text{CDCl}_3$ )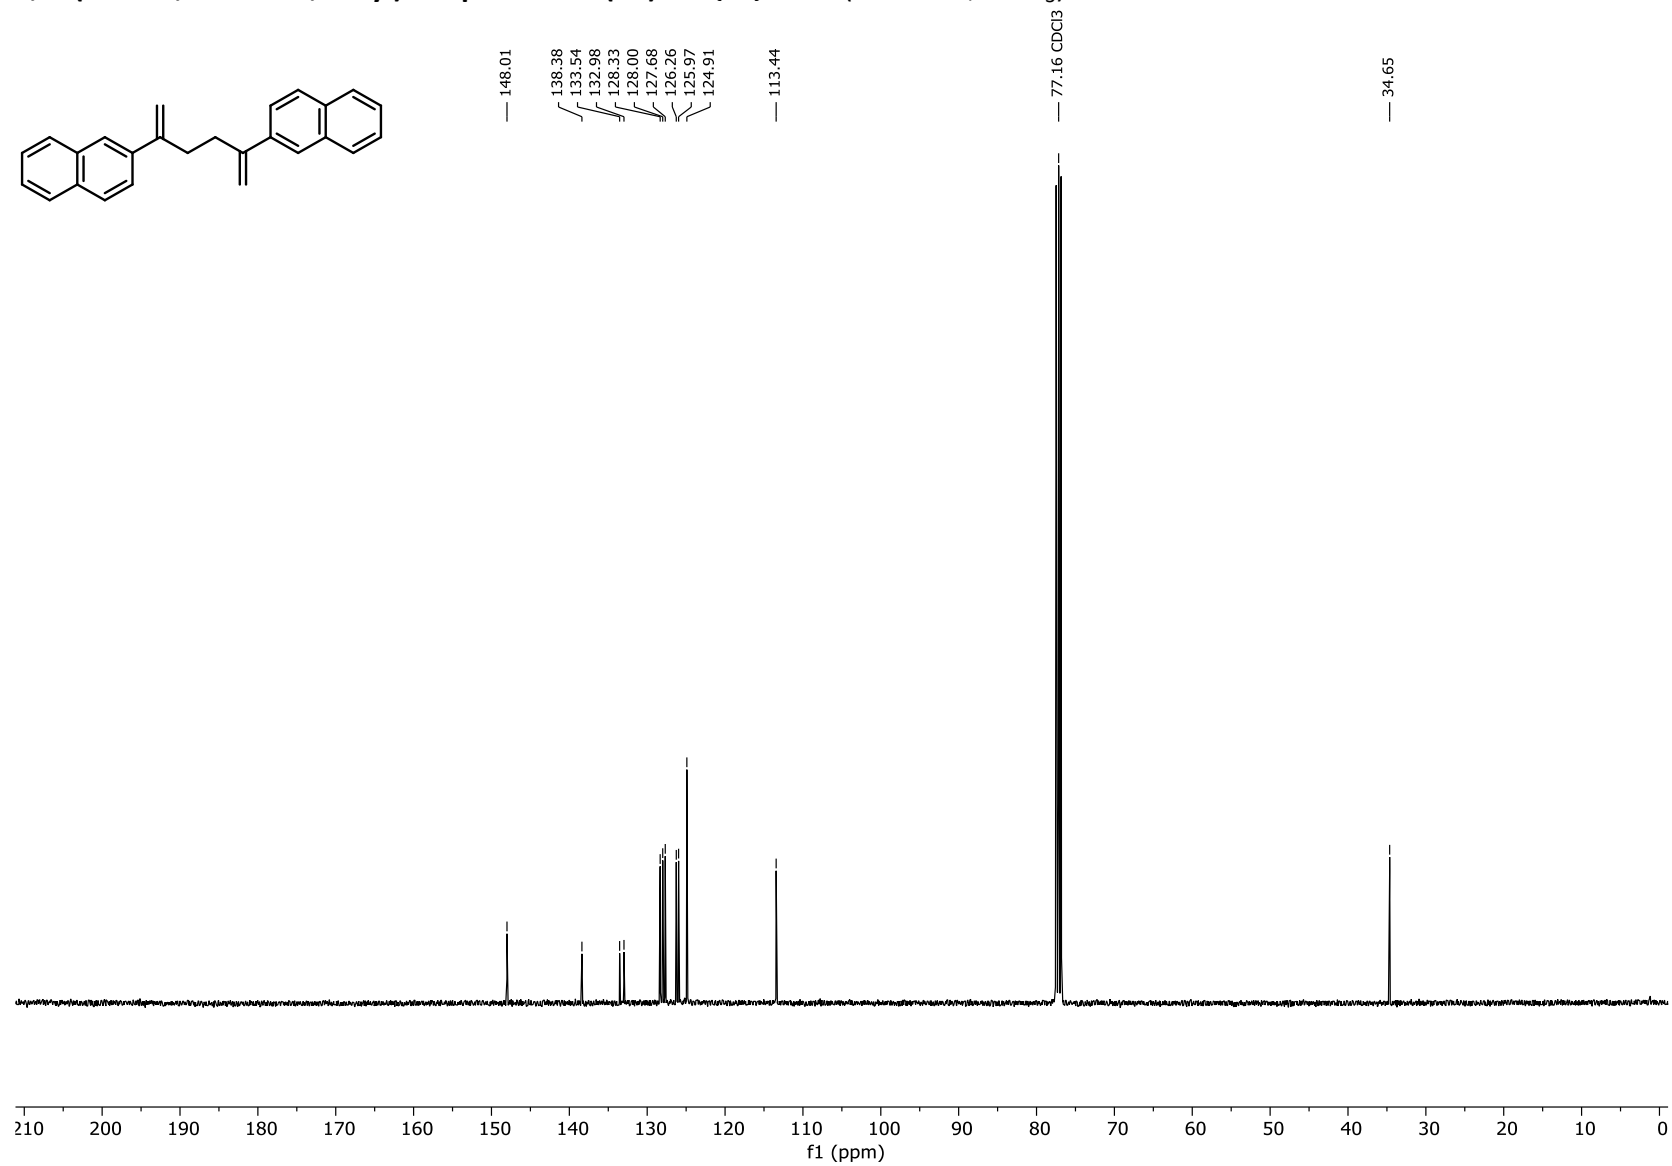

1-Phenylprop-2-en-1-one (S14):  $^1\text{H}$  NMR (300 MHz,  $\text{CDCl}_3$ )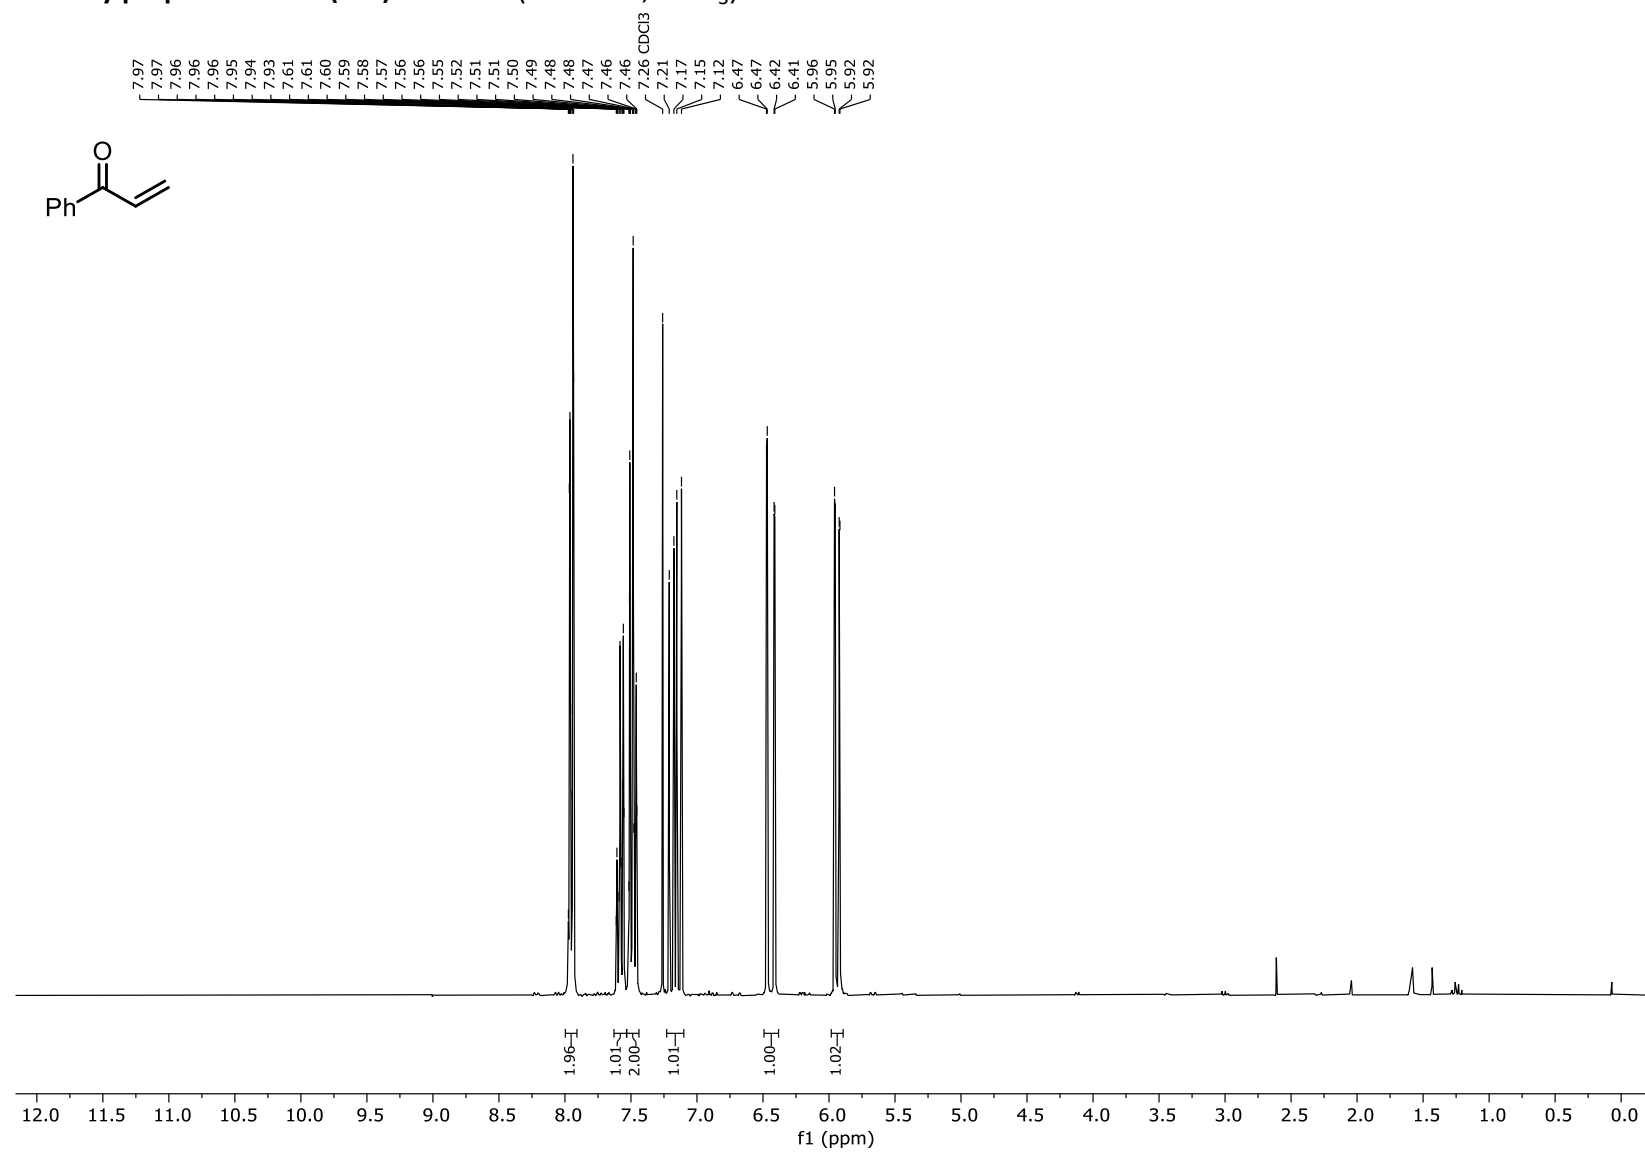

**1-Phenylprop-2-en-1-one (S14):**  $^{13}\text{C}\{^1\text{H}\}$  NMR (75 MHz,  $\text{CDCl}_3$ )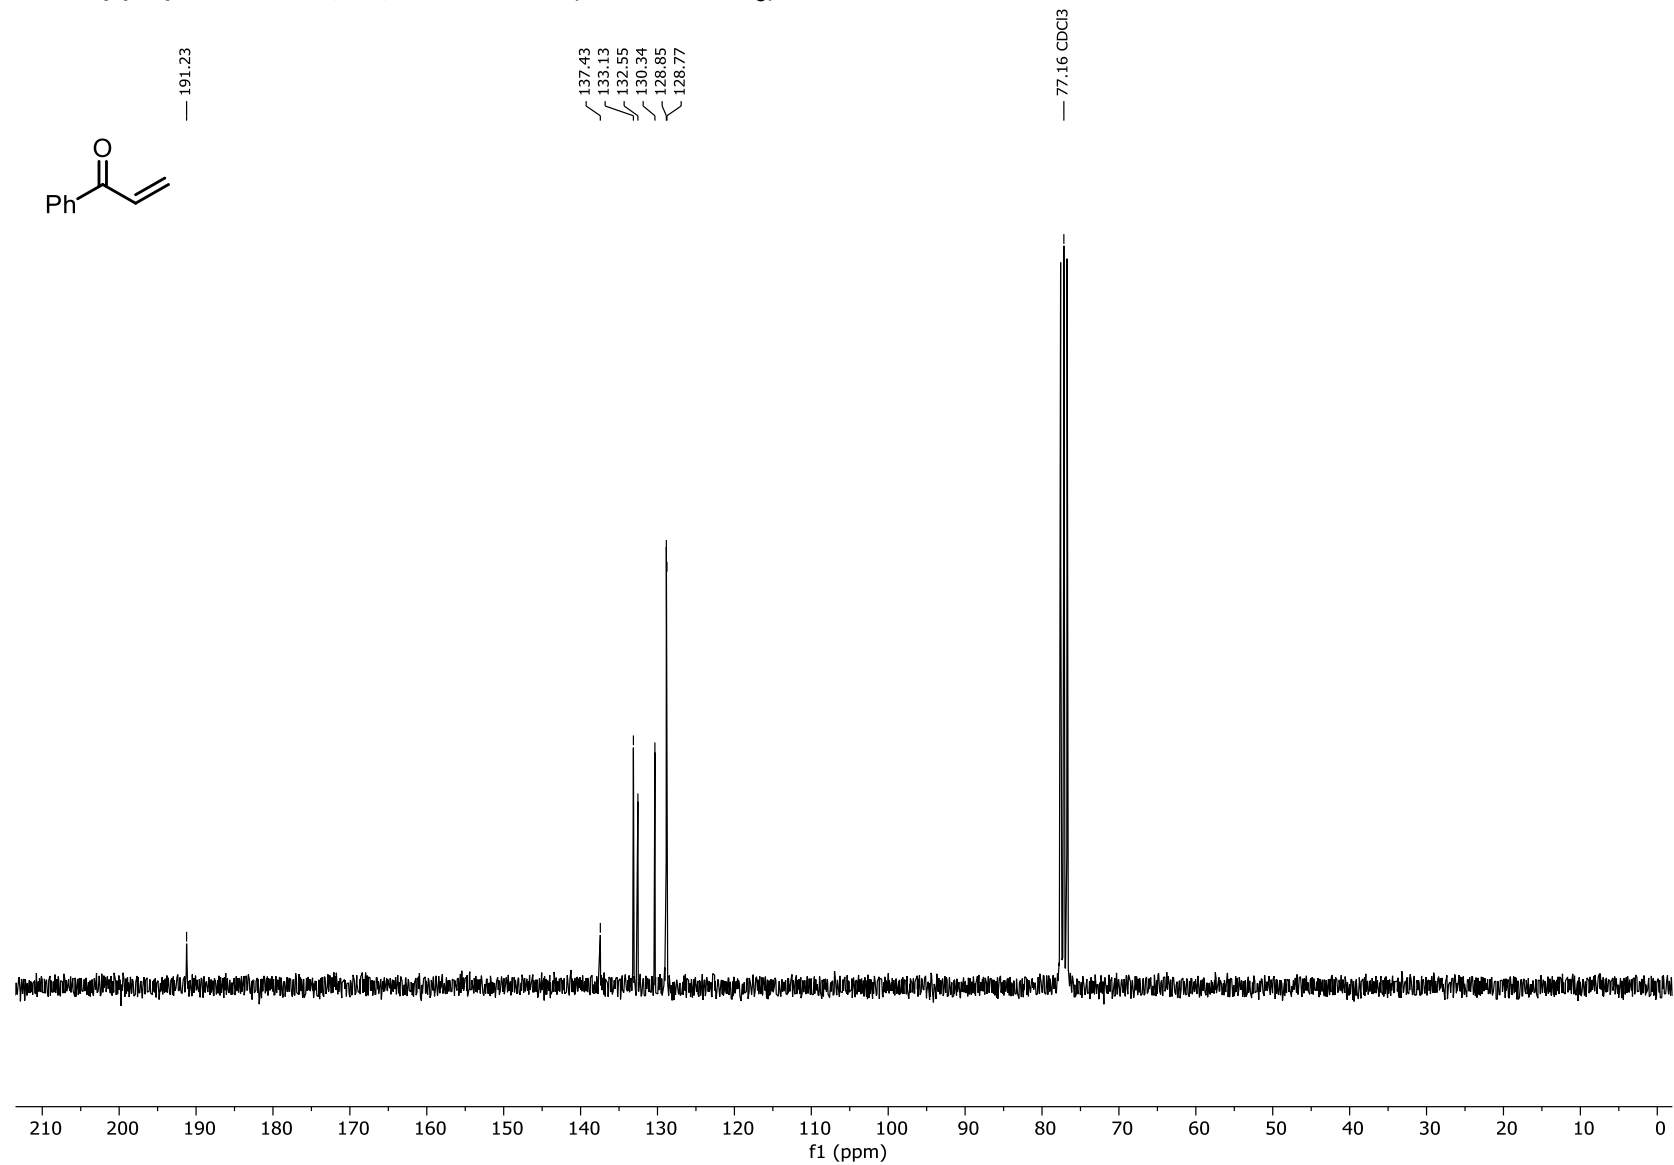

1-Phenyl-4-(4-(trifluoromethyl)phenyl)butane-1,4-dione (S15):  $^1\text{H}$  NMR (400 MHz,  $\text{CDCl}_3$ )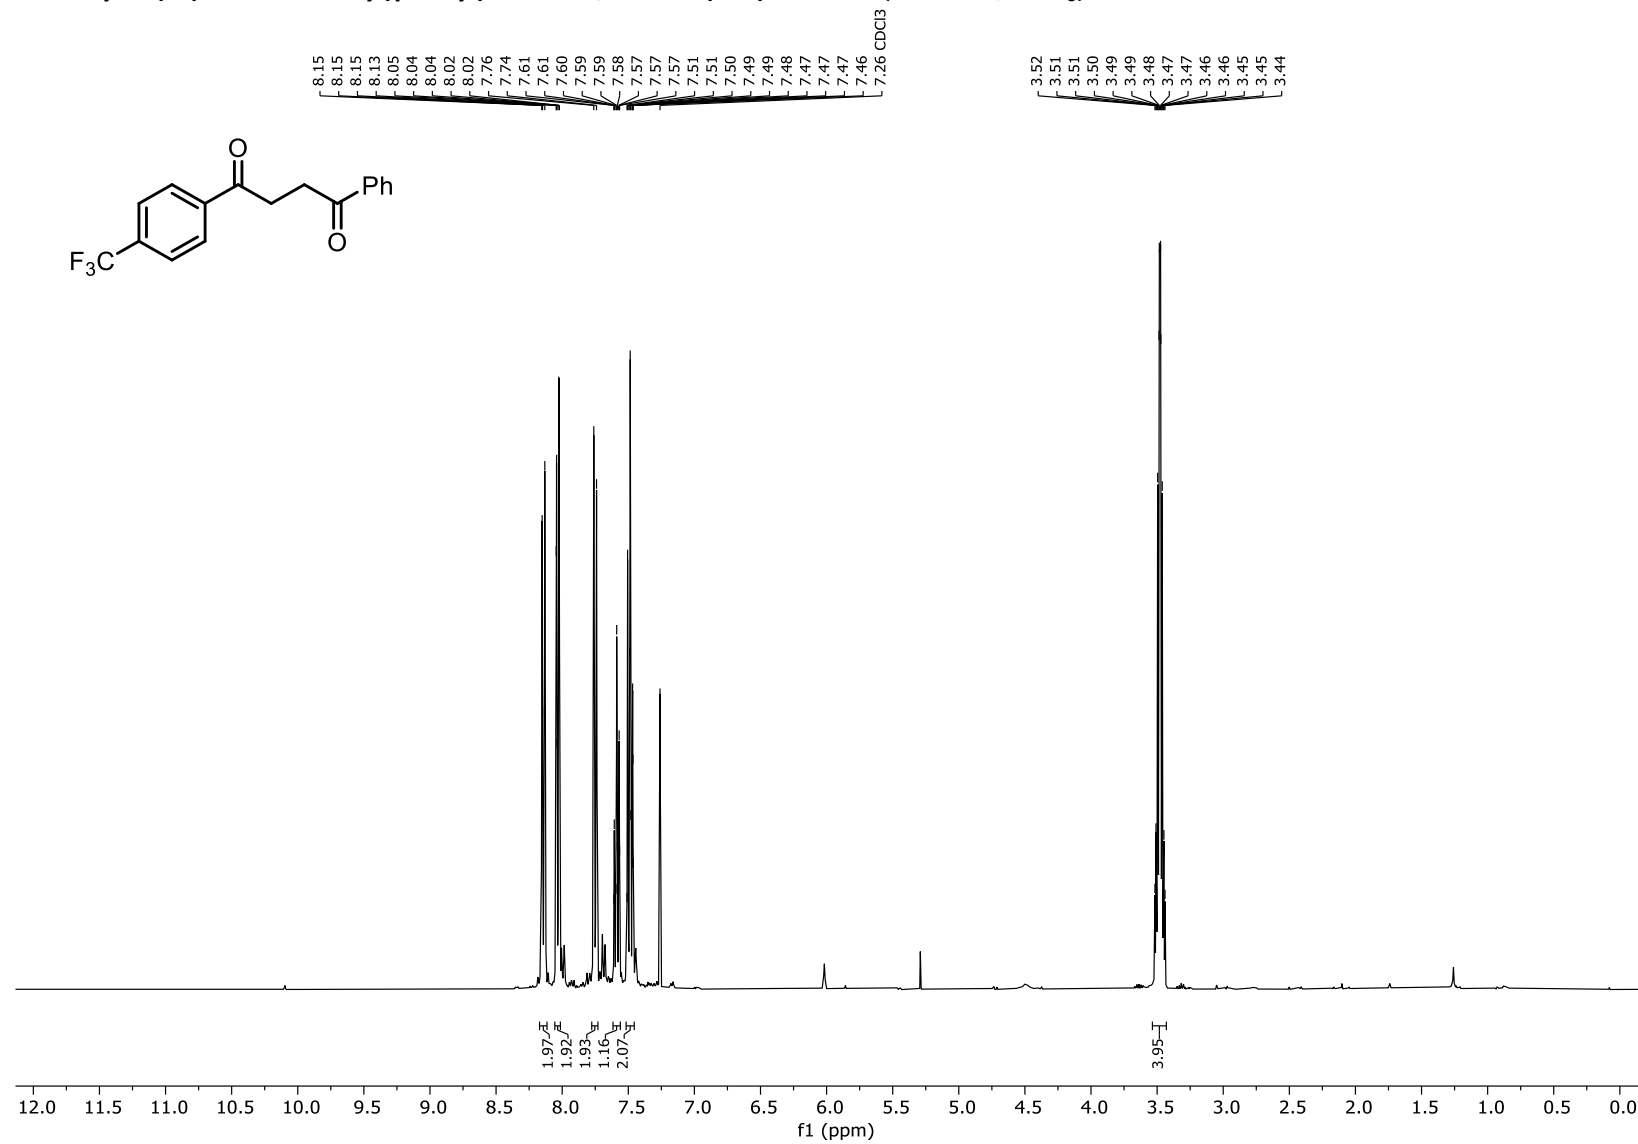

**1-Phenyl-4-(4-(trifluoromethyl)phenyl)butane-1,4-dione (S15):**  $^{13}\text{C}\{^1\text{H}\}$  NMR (101 MHz,  $\text{CDCl}_3$ )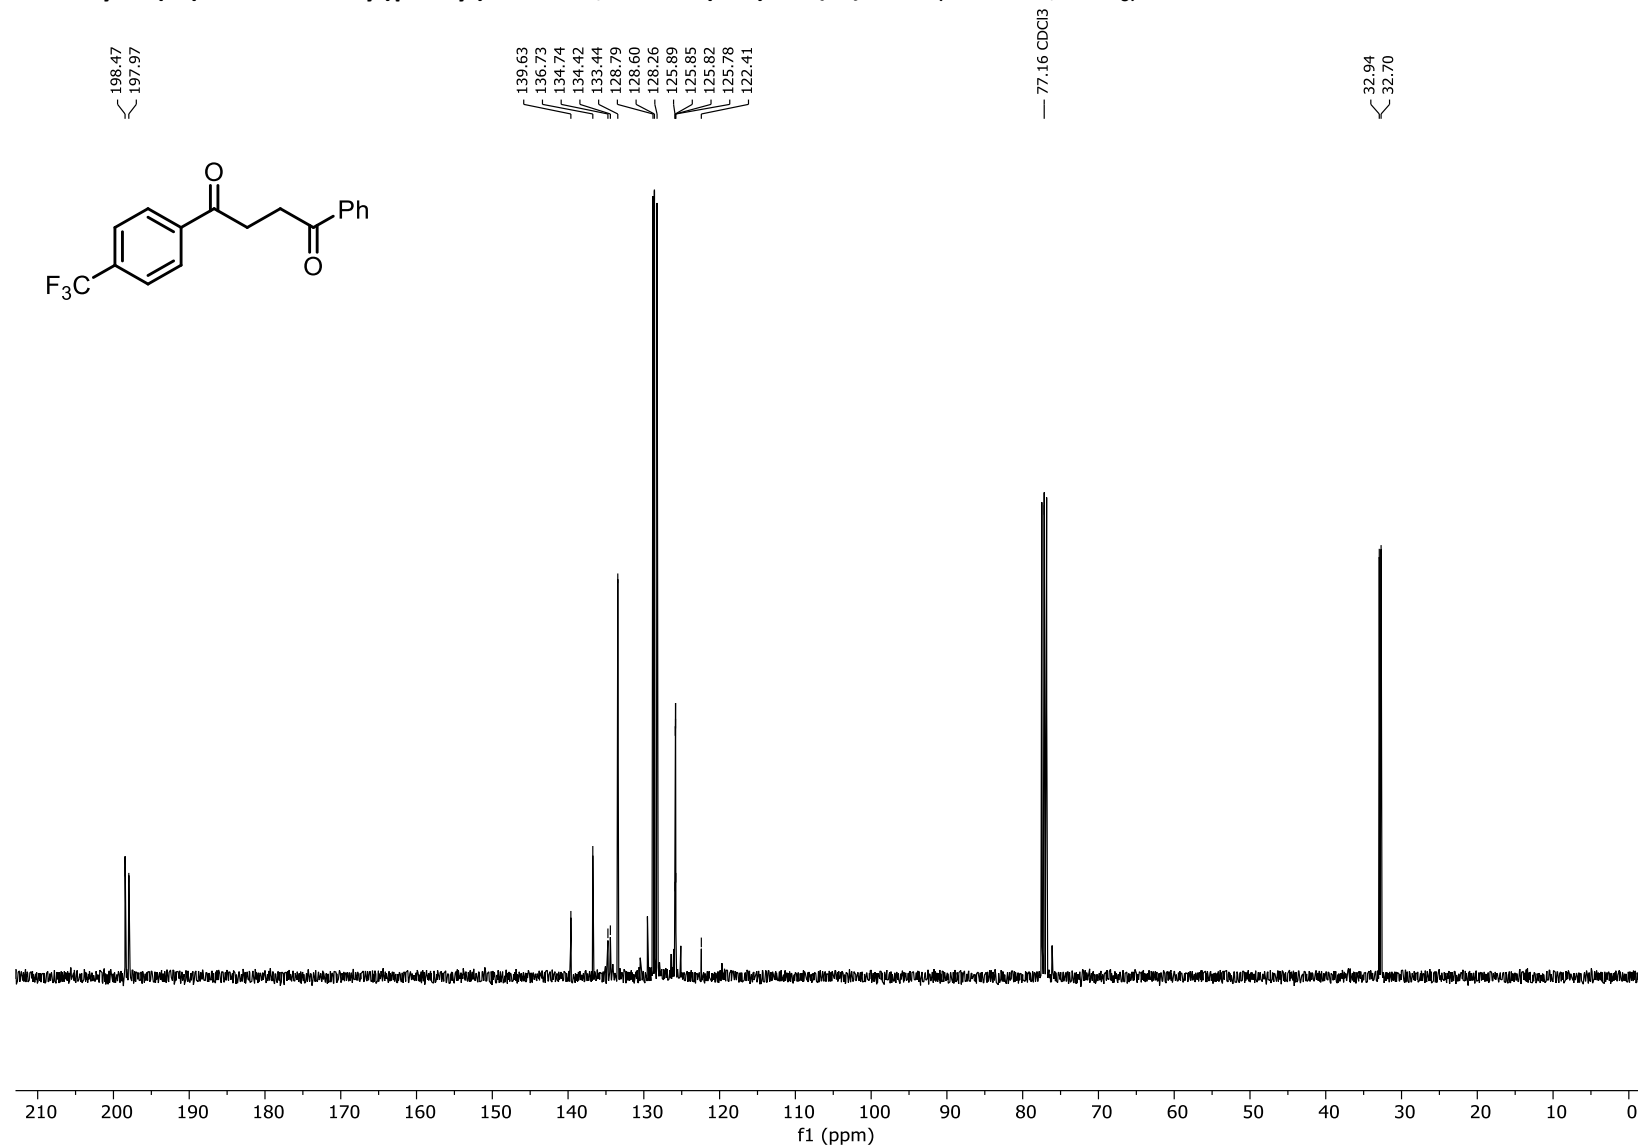



**1-Phenyl-4-(4-(trifluoromethyl)phenyl)butane-1,4-dione (S15):**  $^{19}\text{F}\{^1\text{H}\}$  (282 MHz,  $\text{CDCl}_3$ )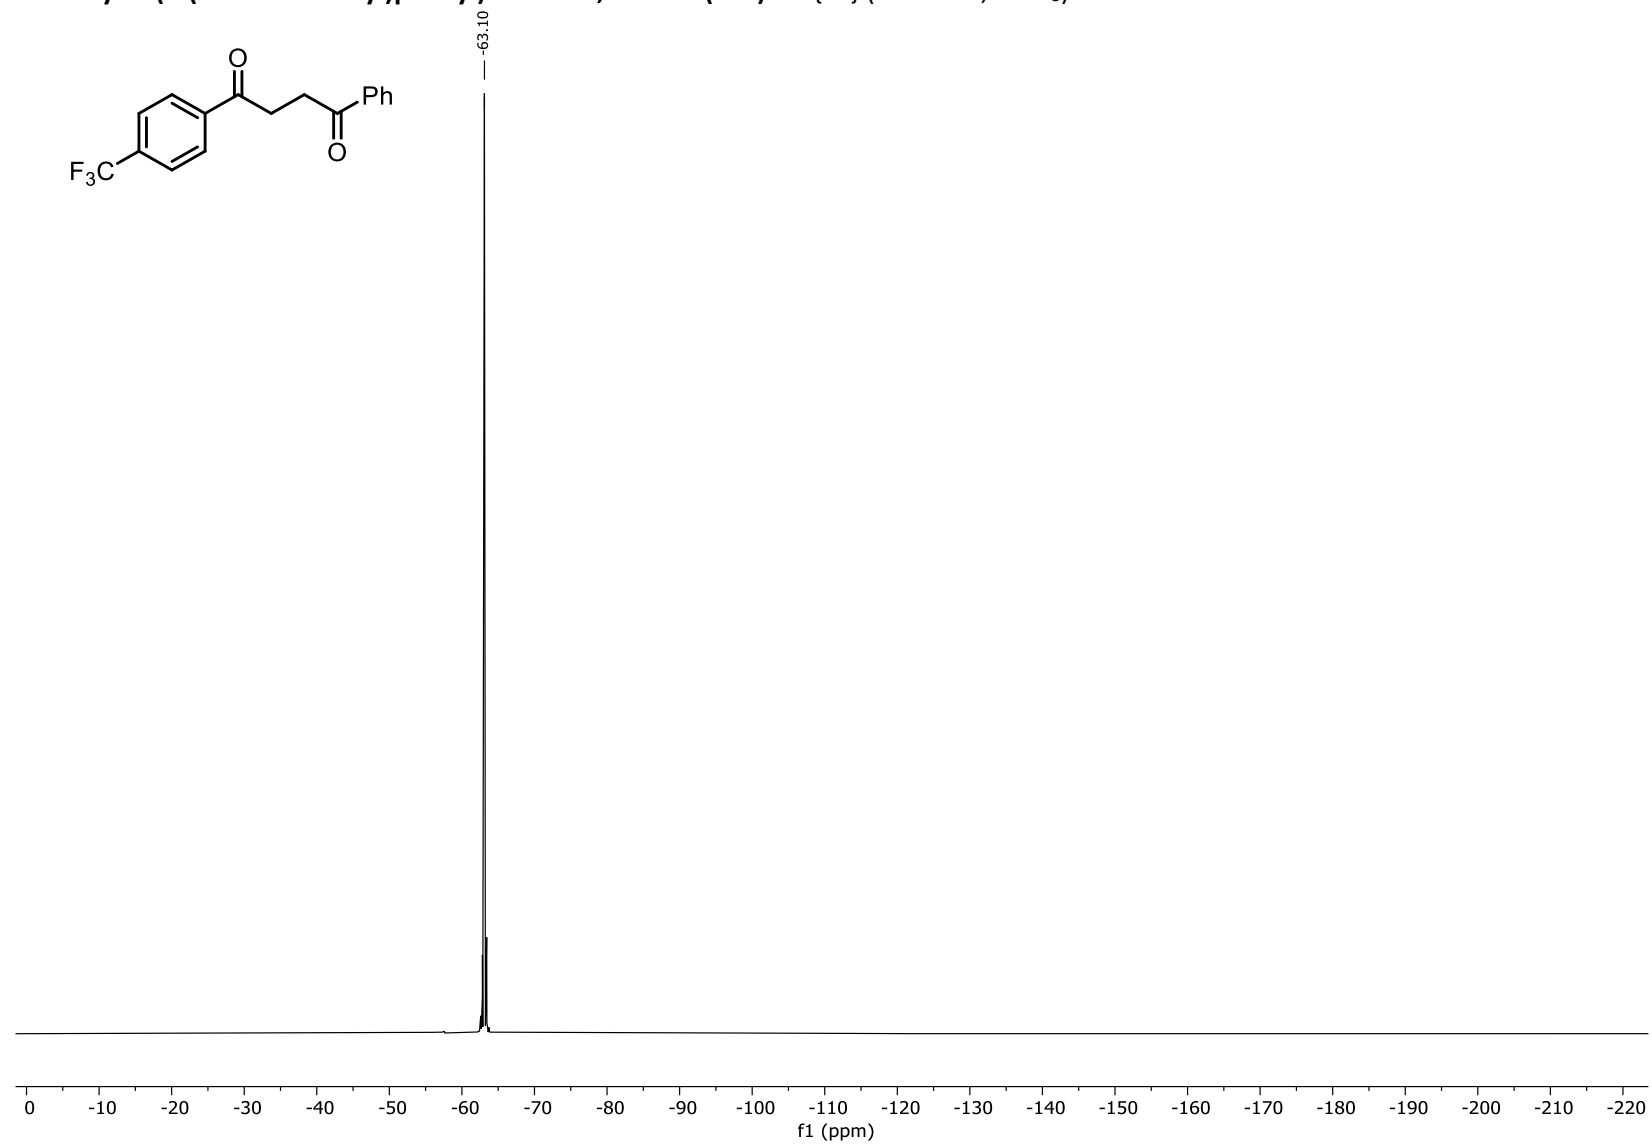

**1-(5-Phenylhexa-1,5-dien-2-yl)-4-(trifluoromethyl)benzene (1o):**  $^1\text{H}$  NMR (300 MHz,  $\text{CDCl}_3$ )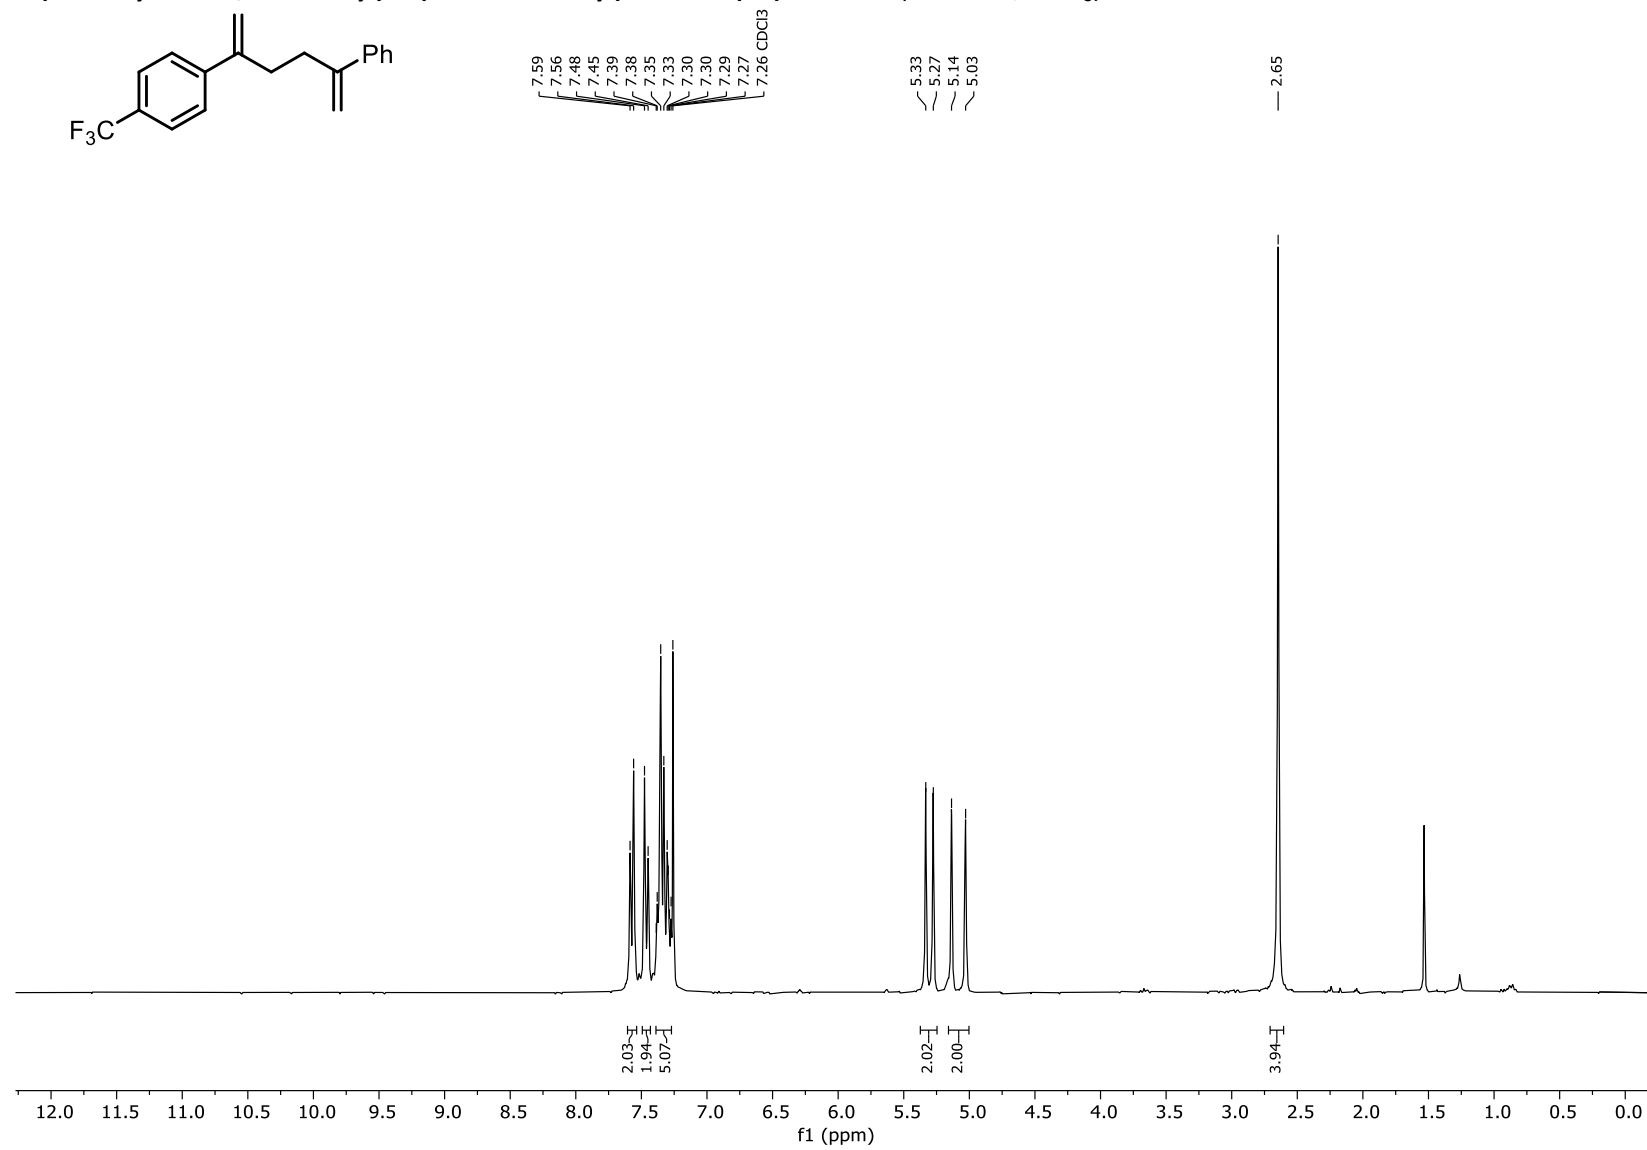

**1-(5-Phenylhexa-1,5-dien-2-yl)-4-(trifluoromethyl)benzene (1o):**  $^{13}\text{C}\{^1\text{H}\}$  NMR (125 MHz,  $\text{CDCl}_3$ )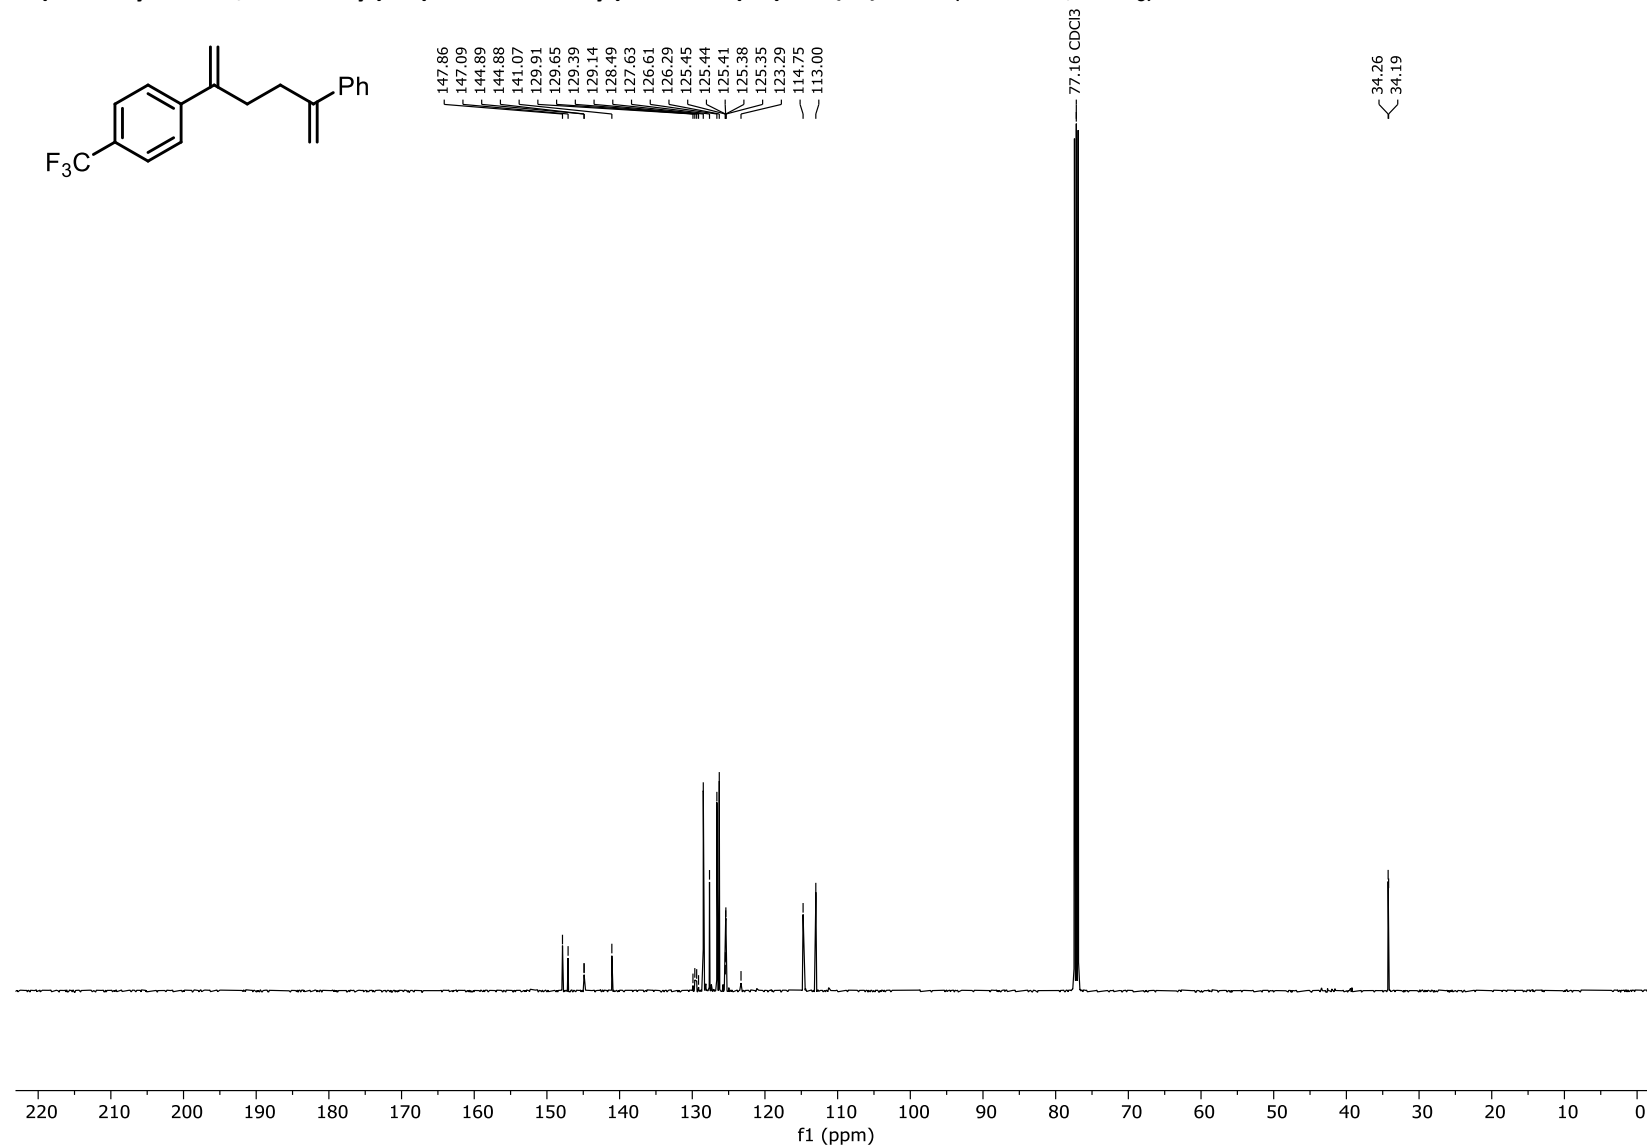

1-(5-Phenylhexa-1,5-dien-2-yl)-4-(trifluoromethyl)benzene (**1o**):  $^{19}\text{F}\{^1\text{H}\}$  (282 MHz,  $\text{CDCl}_3$ )

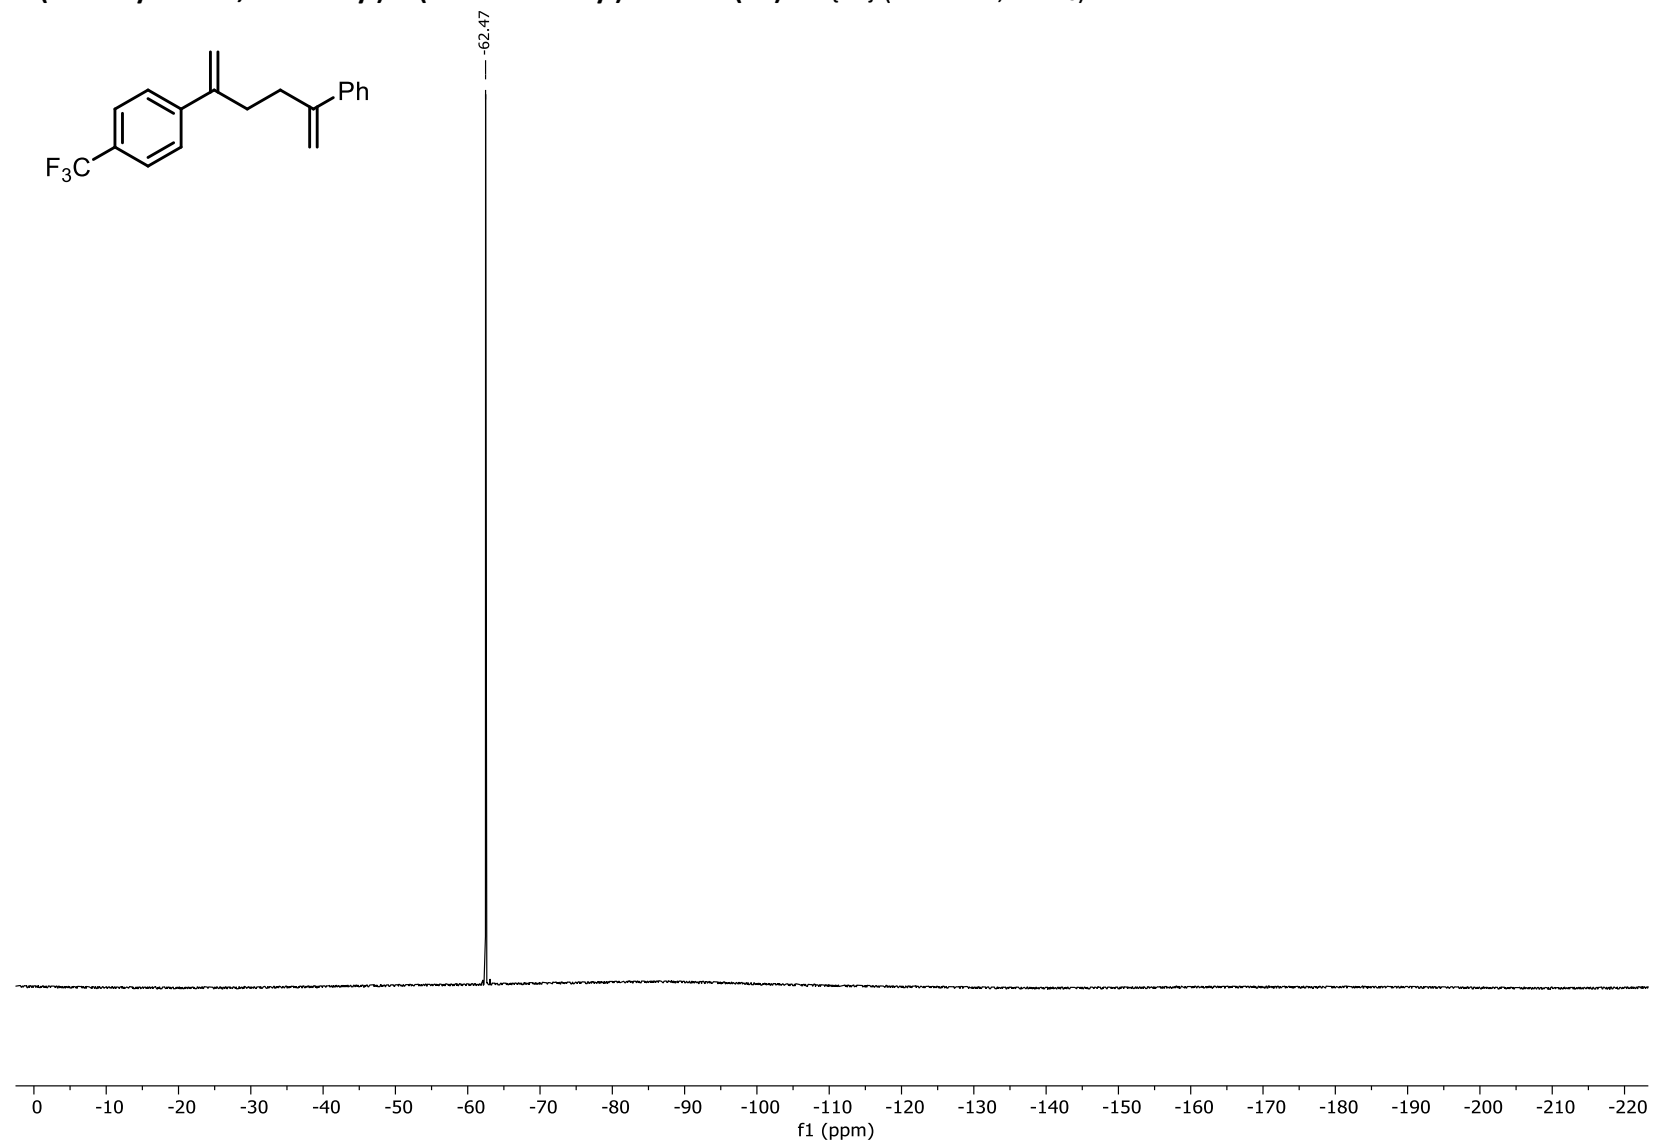

Ethyl 2-benzoylpent-4-enoate (S16):  $^1\text{H}$  NMR (300 MHz,  $\text{CDCl}_3$ )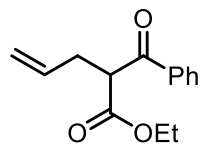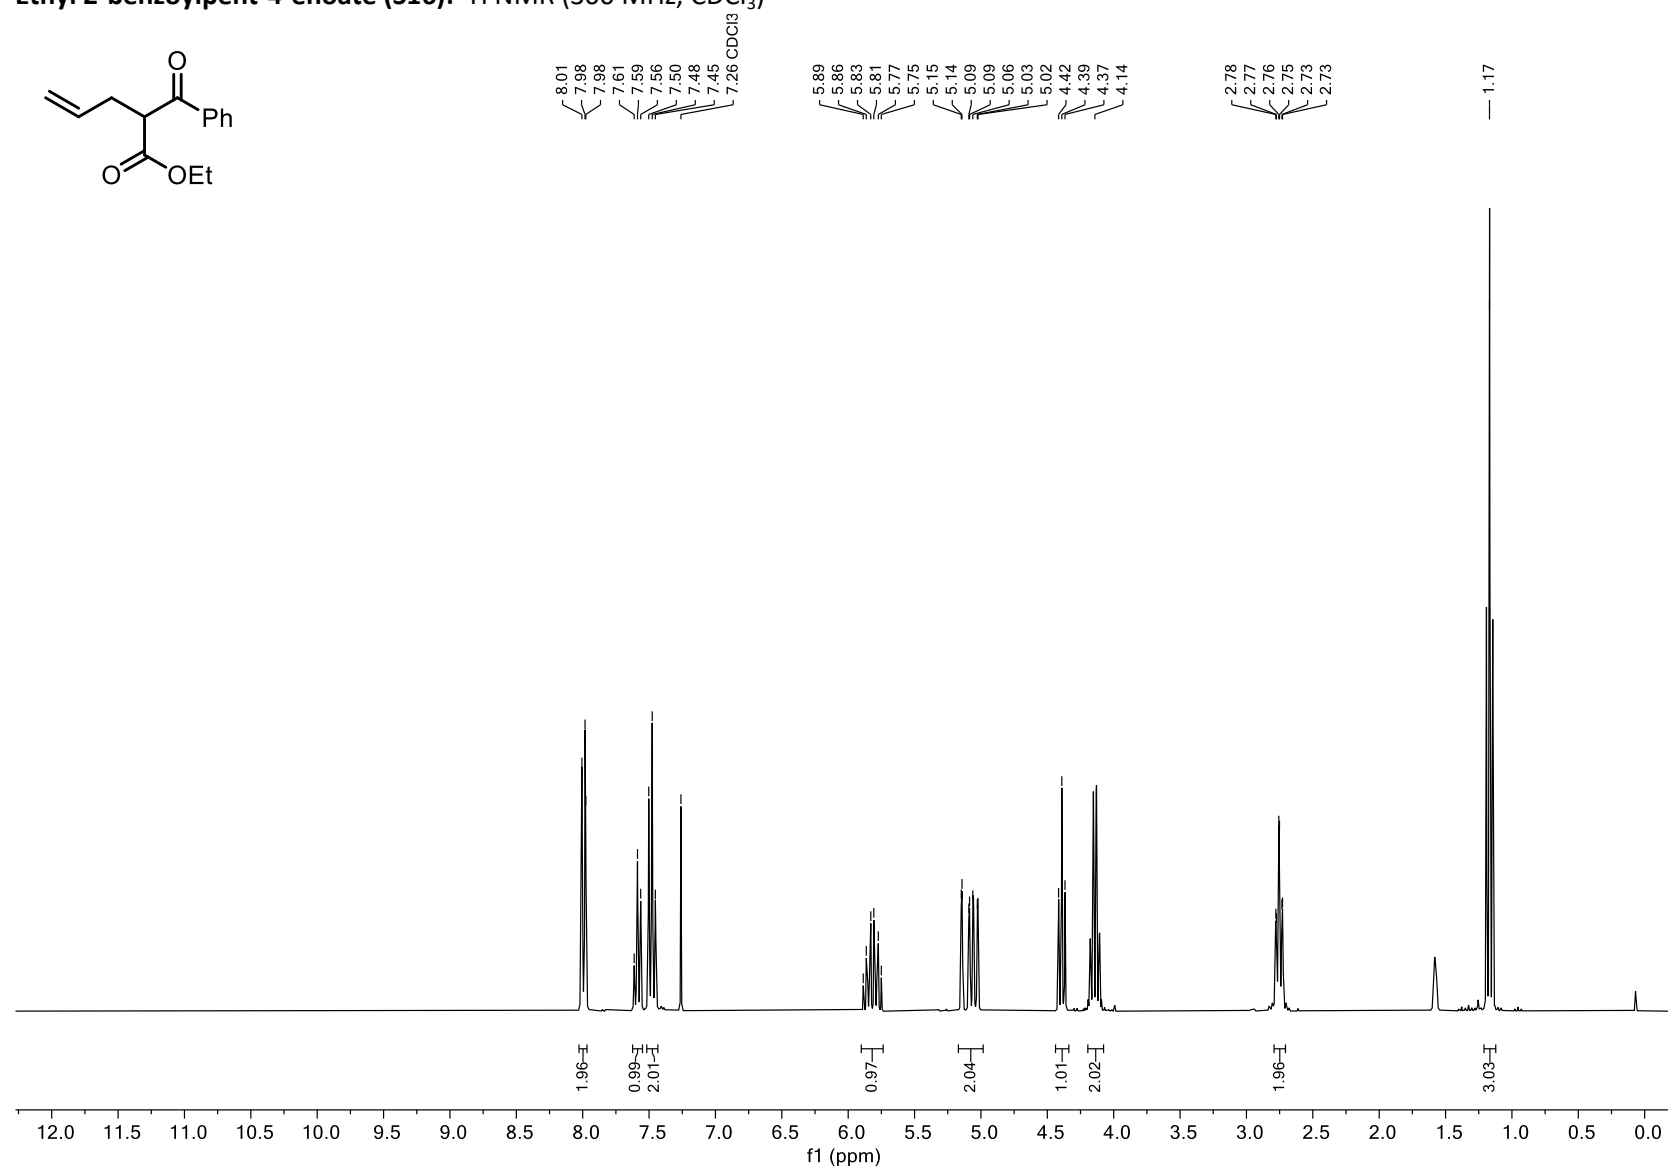

Ethyl 2-benzoylpent-4-enoate (S16):  $^{13}\text{C}\{^1\text{H}\}$  NMR (101 MHz,  $\text{CDCl}_3$ )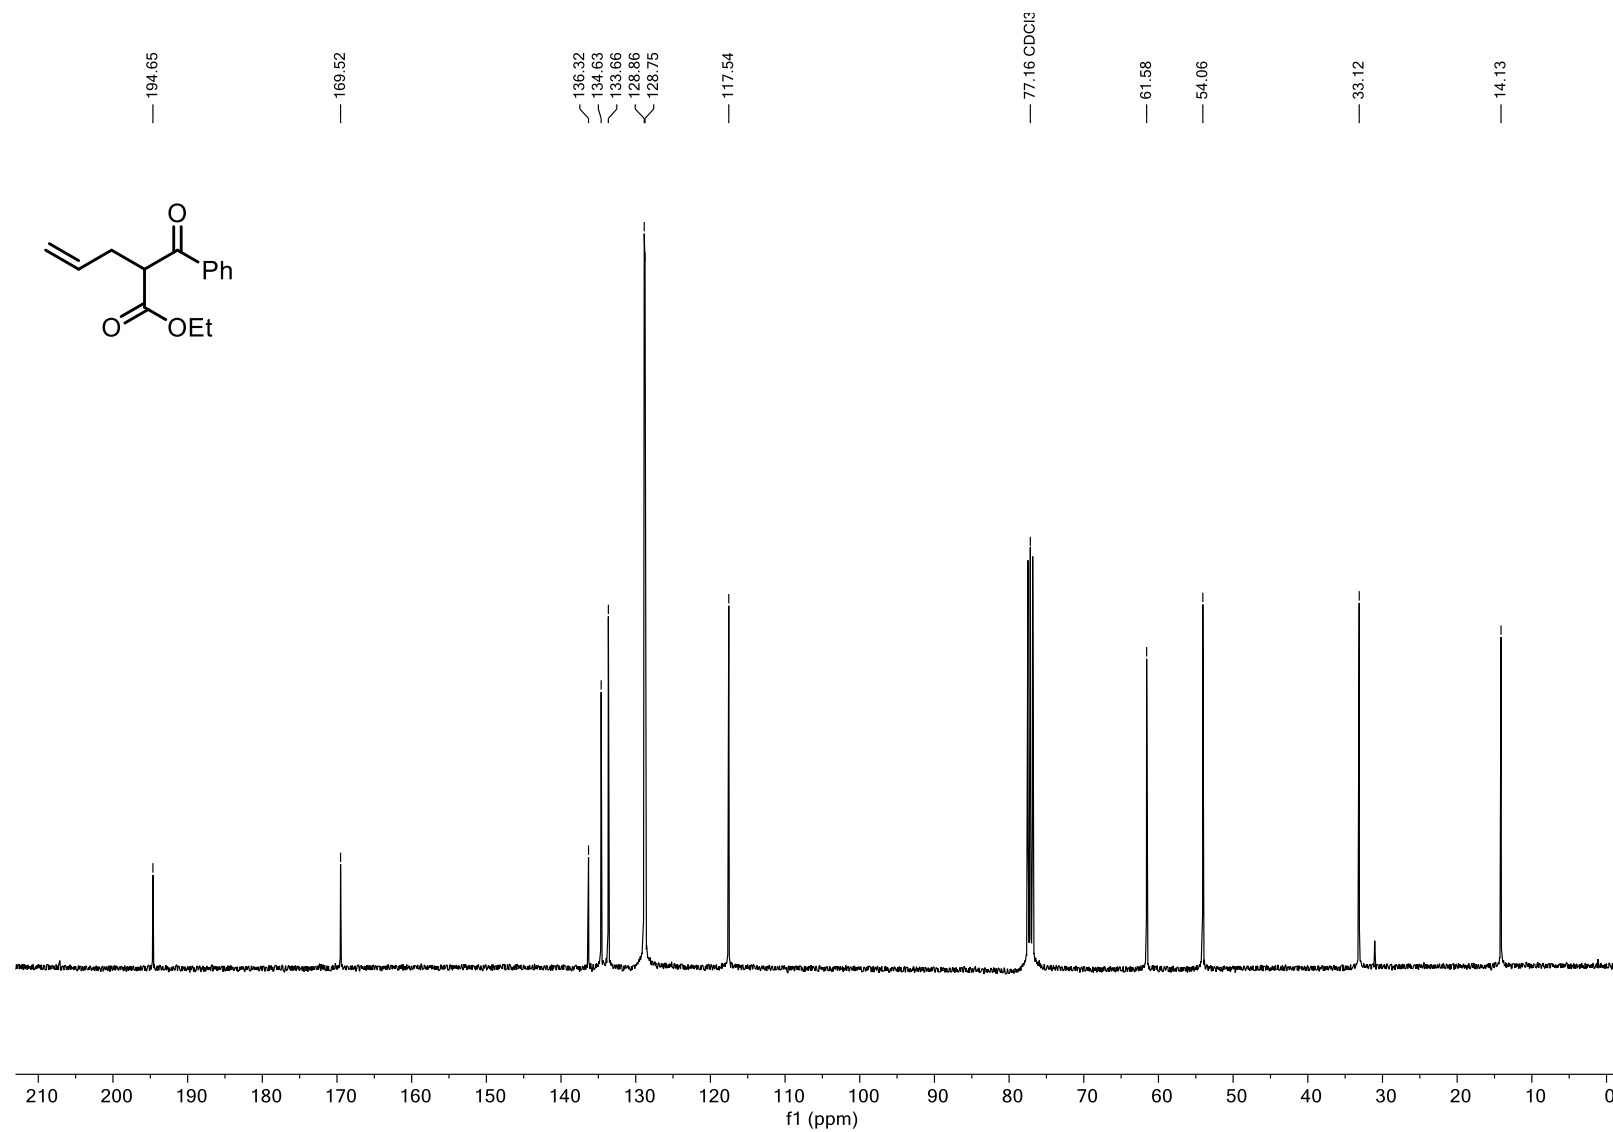

Ethyl 2-(1-phenylvinyl)pent-4-enoate (**1p**):  $^1\text{H}$  NMR (300 MHz,  $\text{CDCl}_3$ )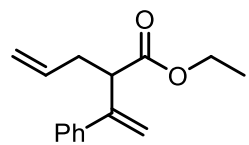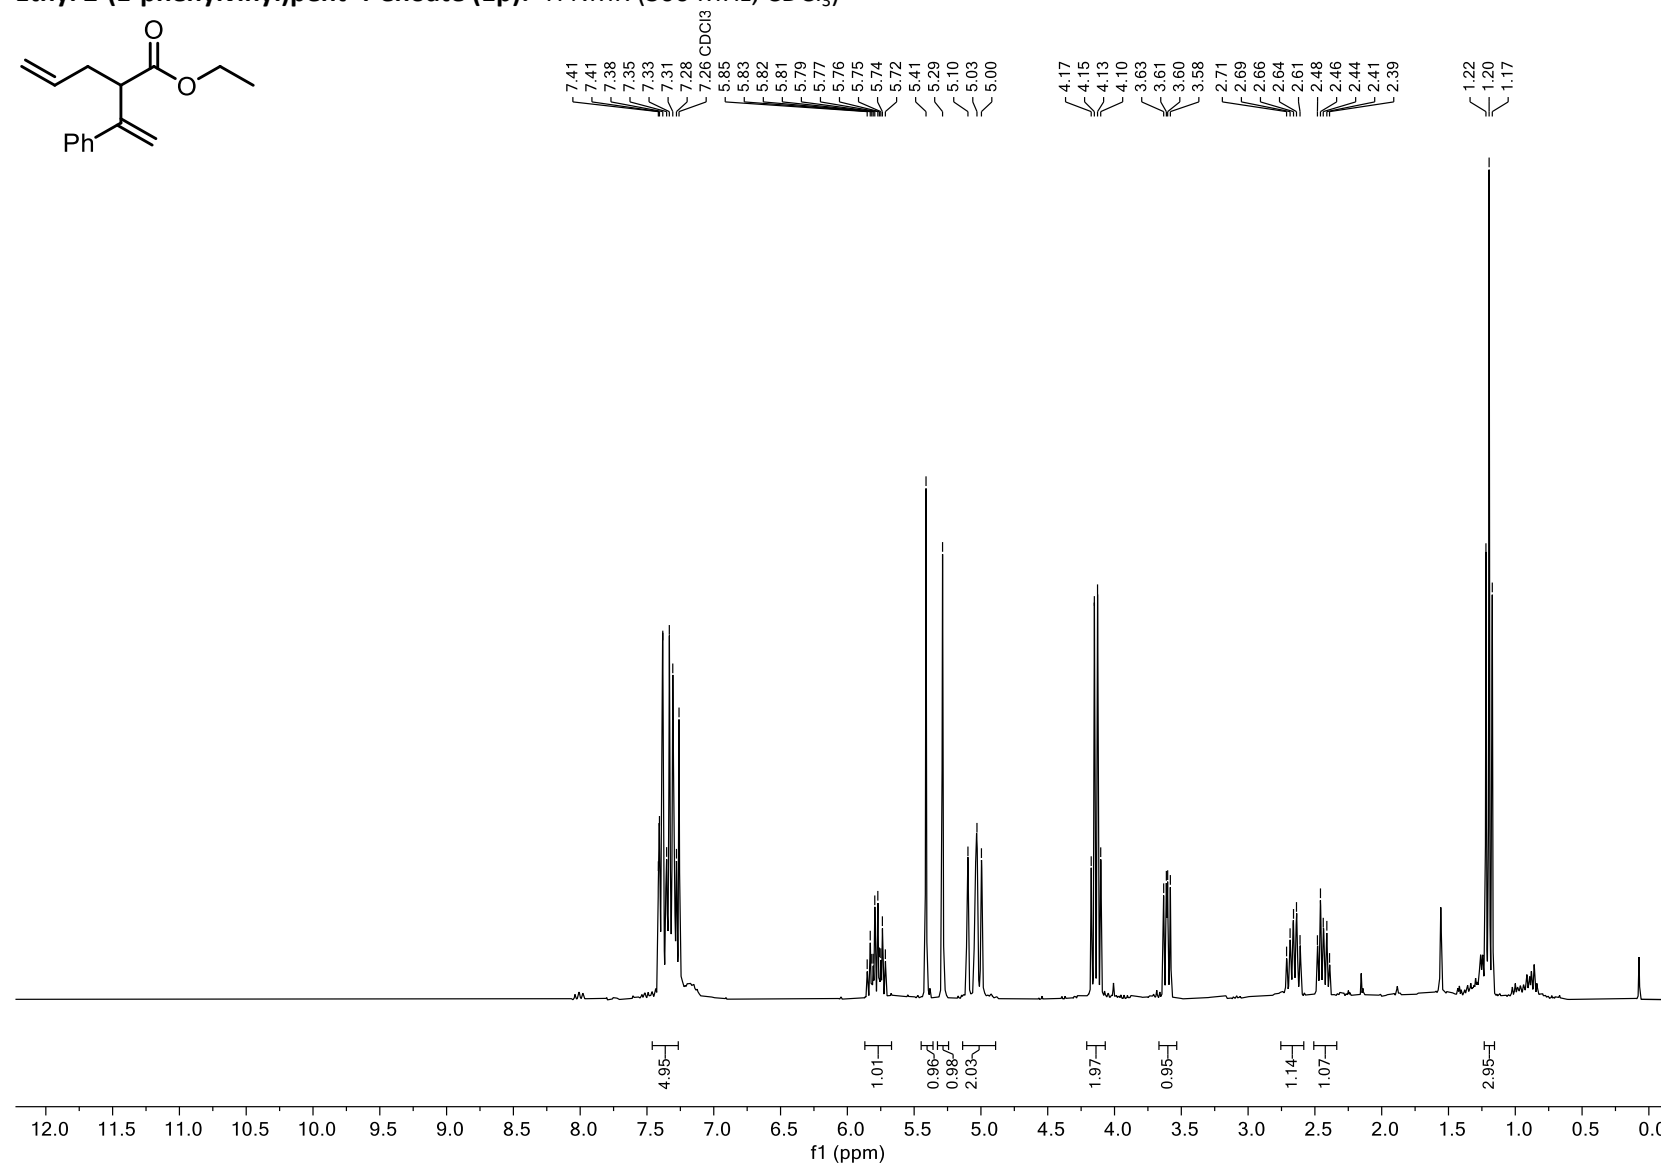

Ethyl 2-(1-phenylvinyl)pent-4-enoate (**1p**):  $^{13}\text{C}\{^1\text{H}\}$  NMR (101 MHz,  $\text{CDCl}_3$ )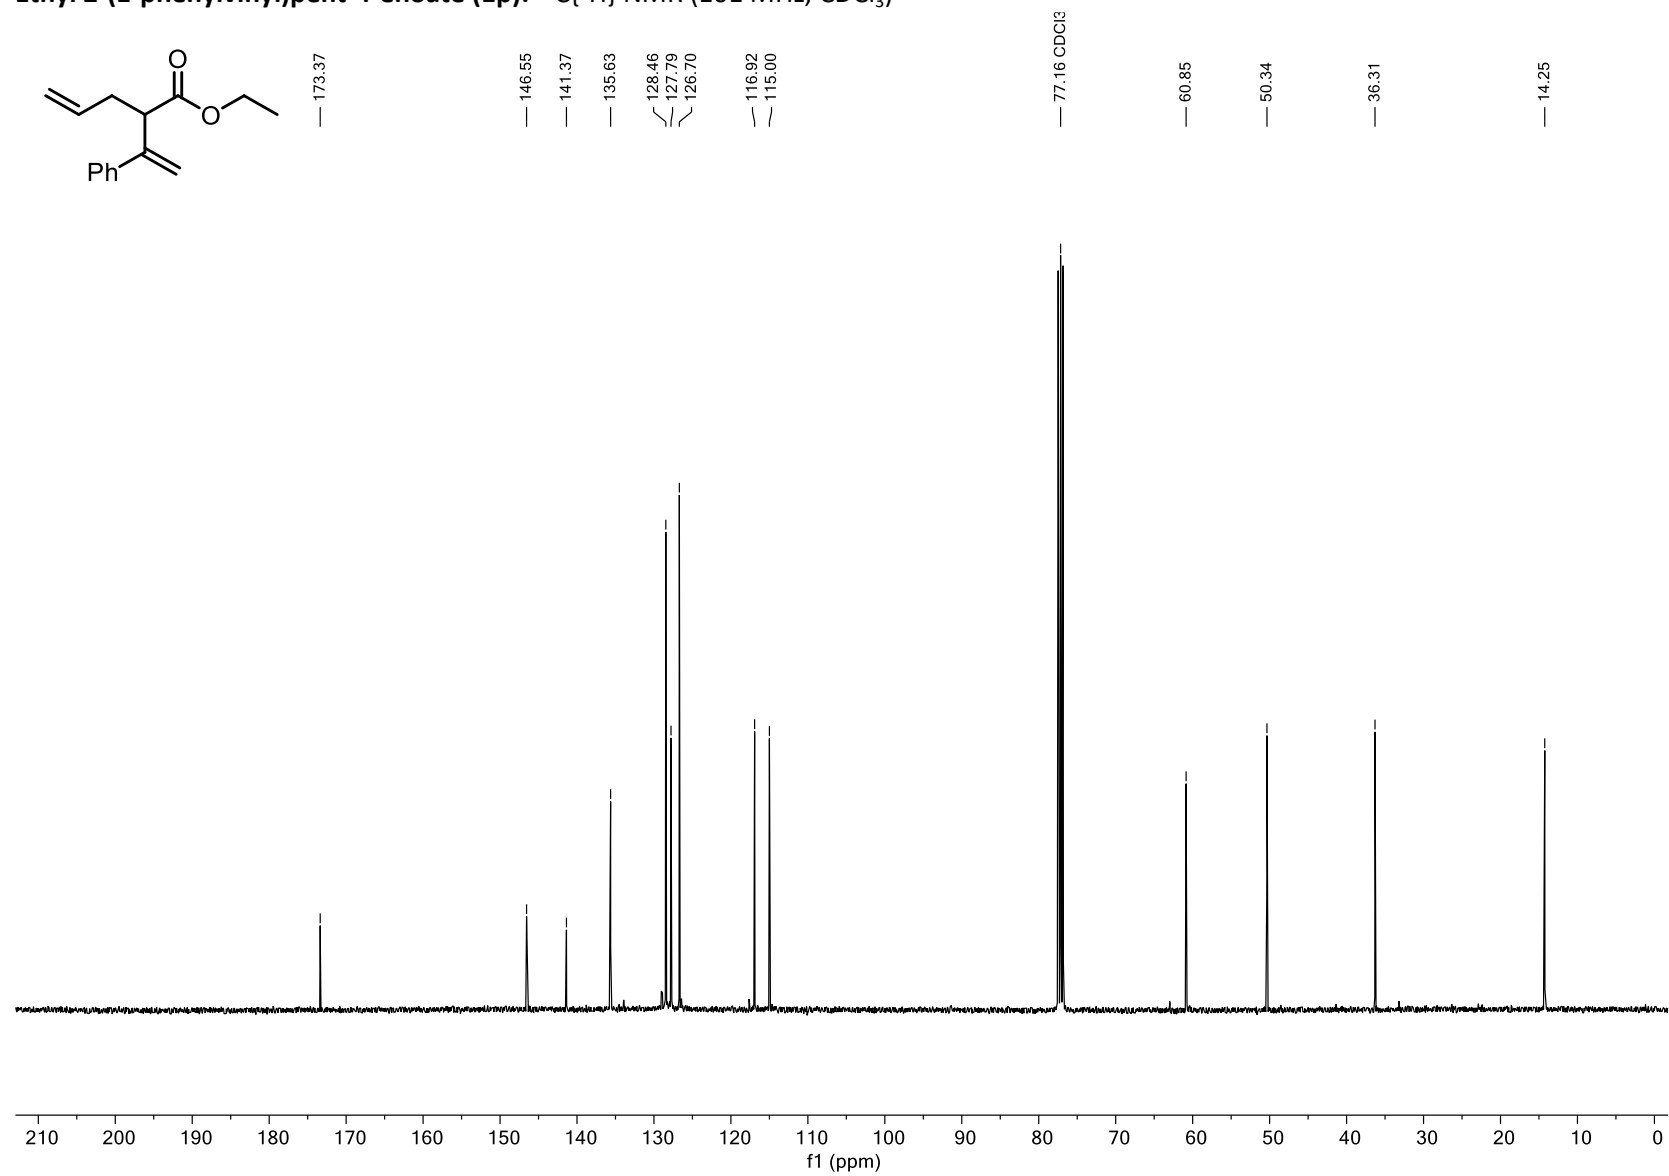



2-Phenylhexa-1,5-dien-3-ol (1q):  $^1\text{H}$  NMR (300 MHz,  $\text{CDCl}_3$ )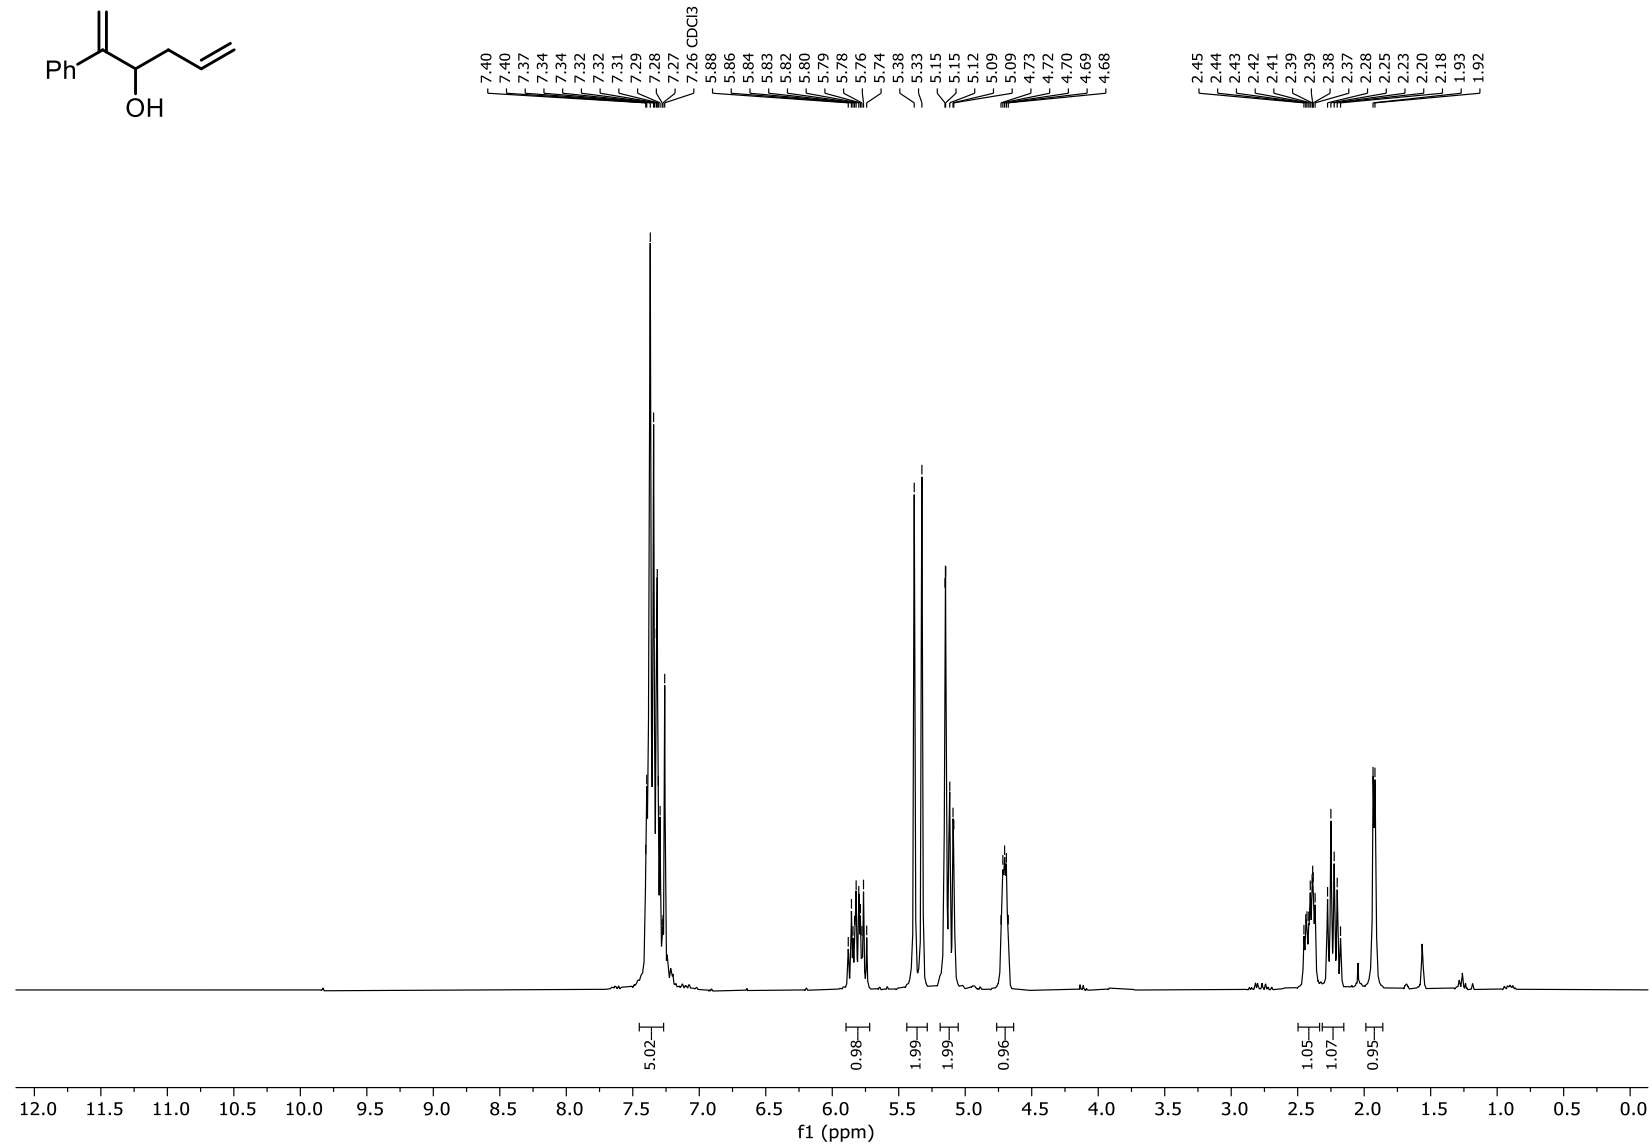

2-Phenylhexa-1,5-dien-3-ol (1q):  $^{13}\text{C}\{^1\text{H}\}$  NMR (75 MHz,  $\text{CDCl}_3$ )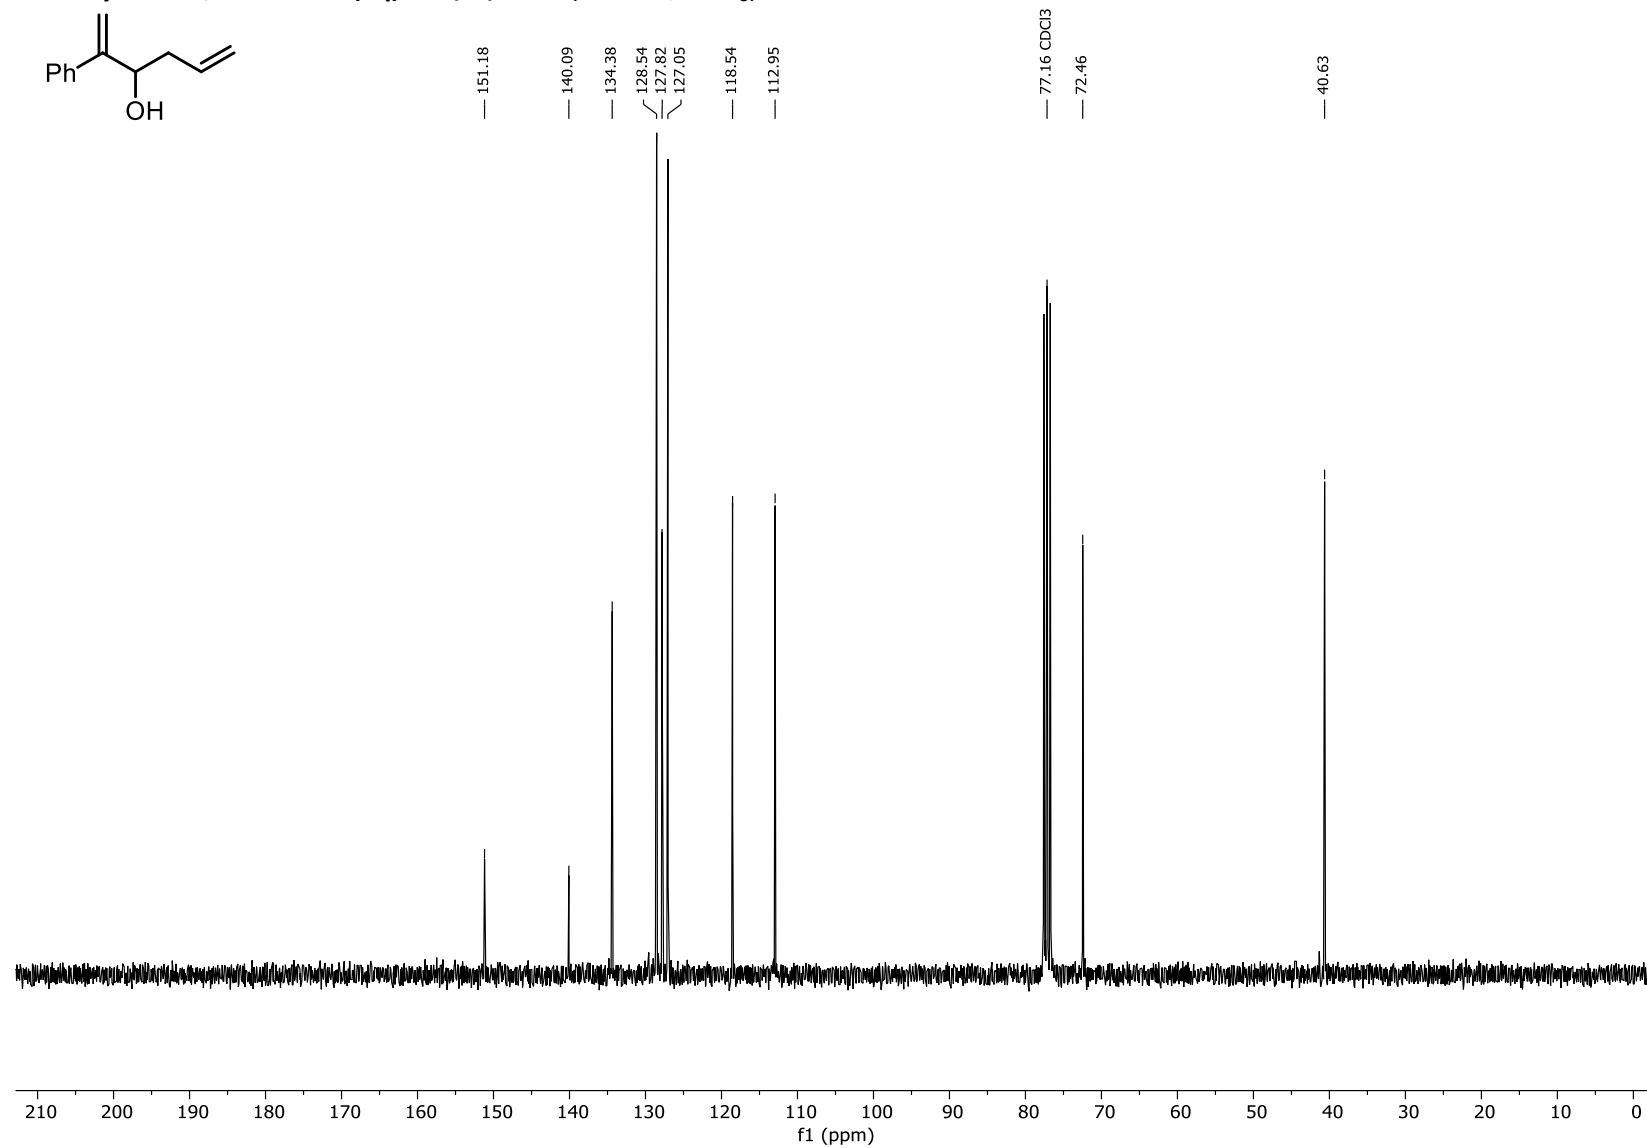

**(E)-3-phenylbut-2-enoic acid (S17):**  $^1\text{H}$  NMR (300 MHz,  $\text{CDCl}_3$ )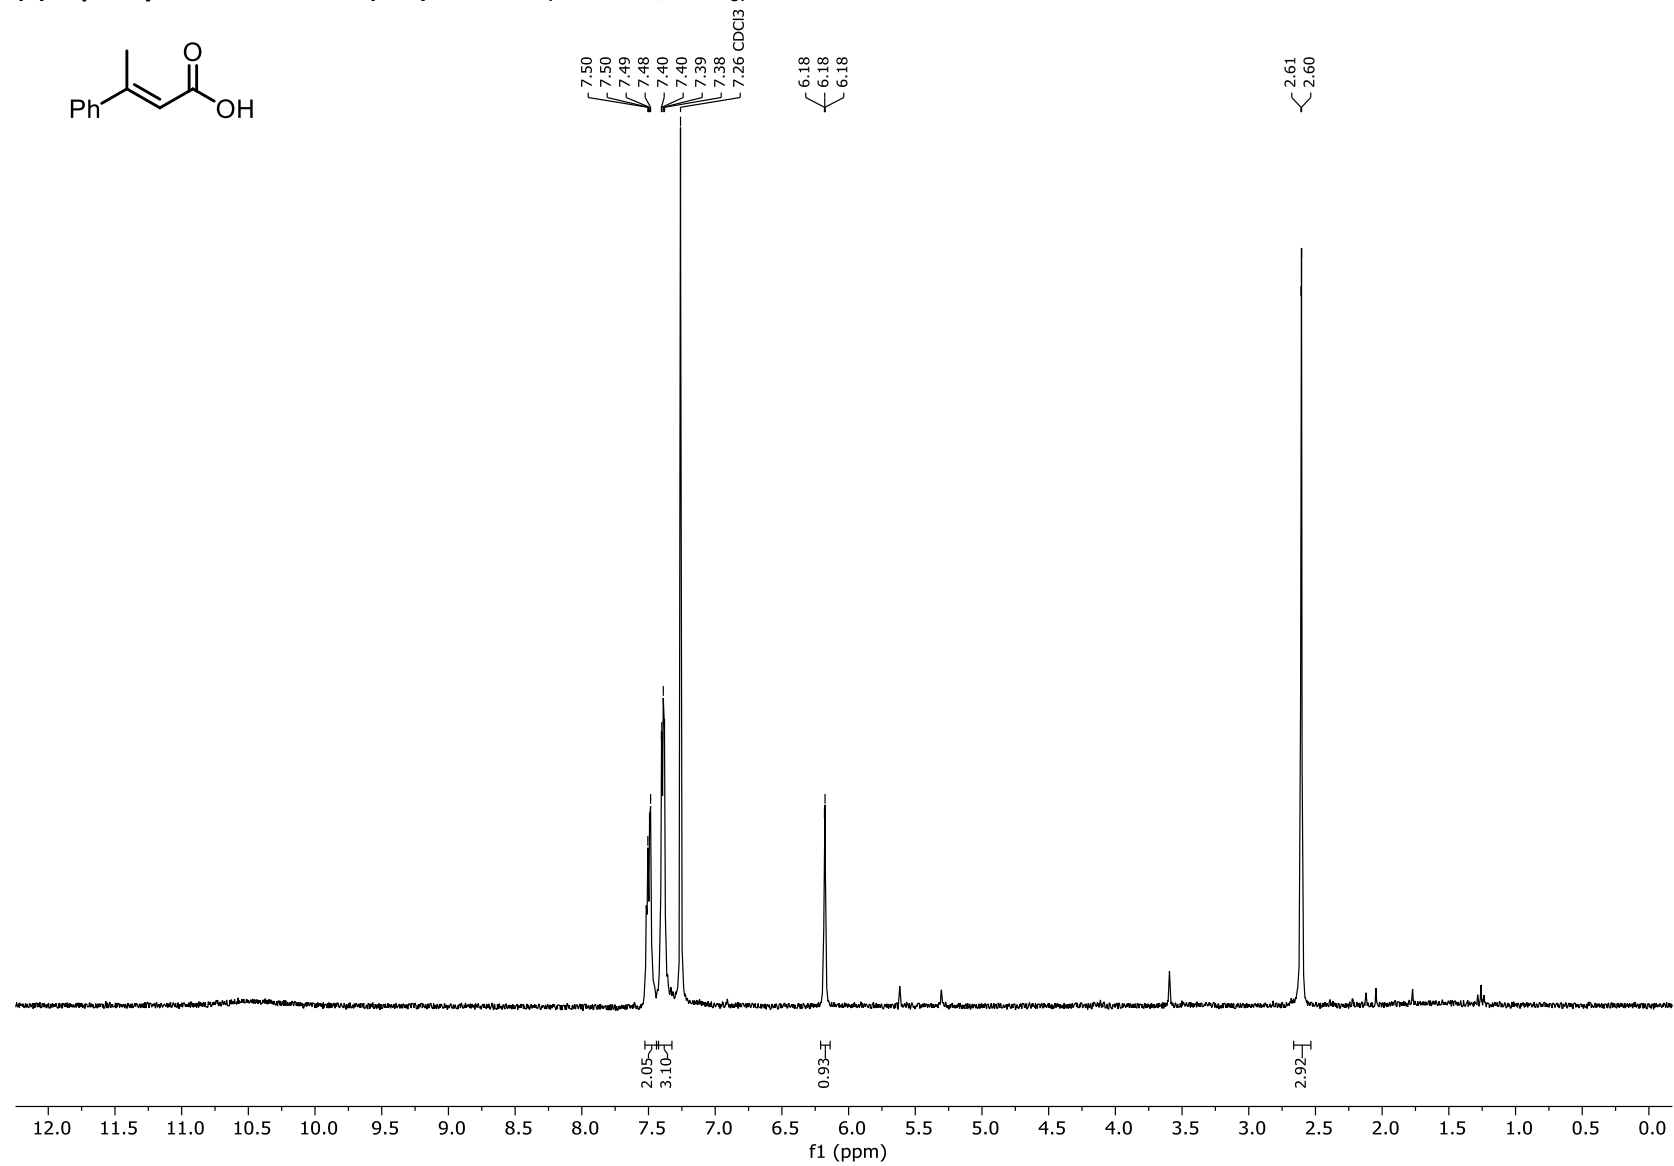

**(E)-3-phenylbut-2-enoic acid (S17):  $^{13}\text{C}\{^1\text{H}\}$  NMR (101 MHz,  $\text{CDCl}_3$ )**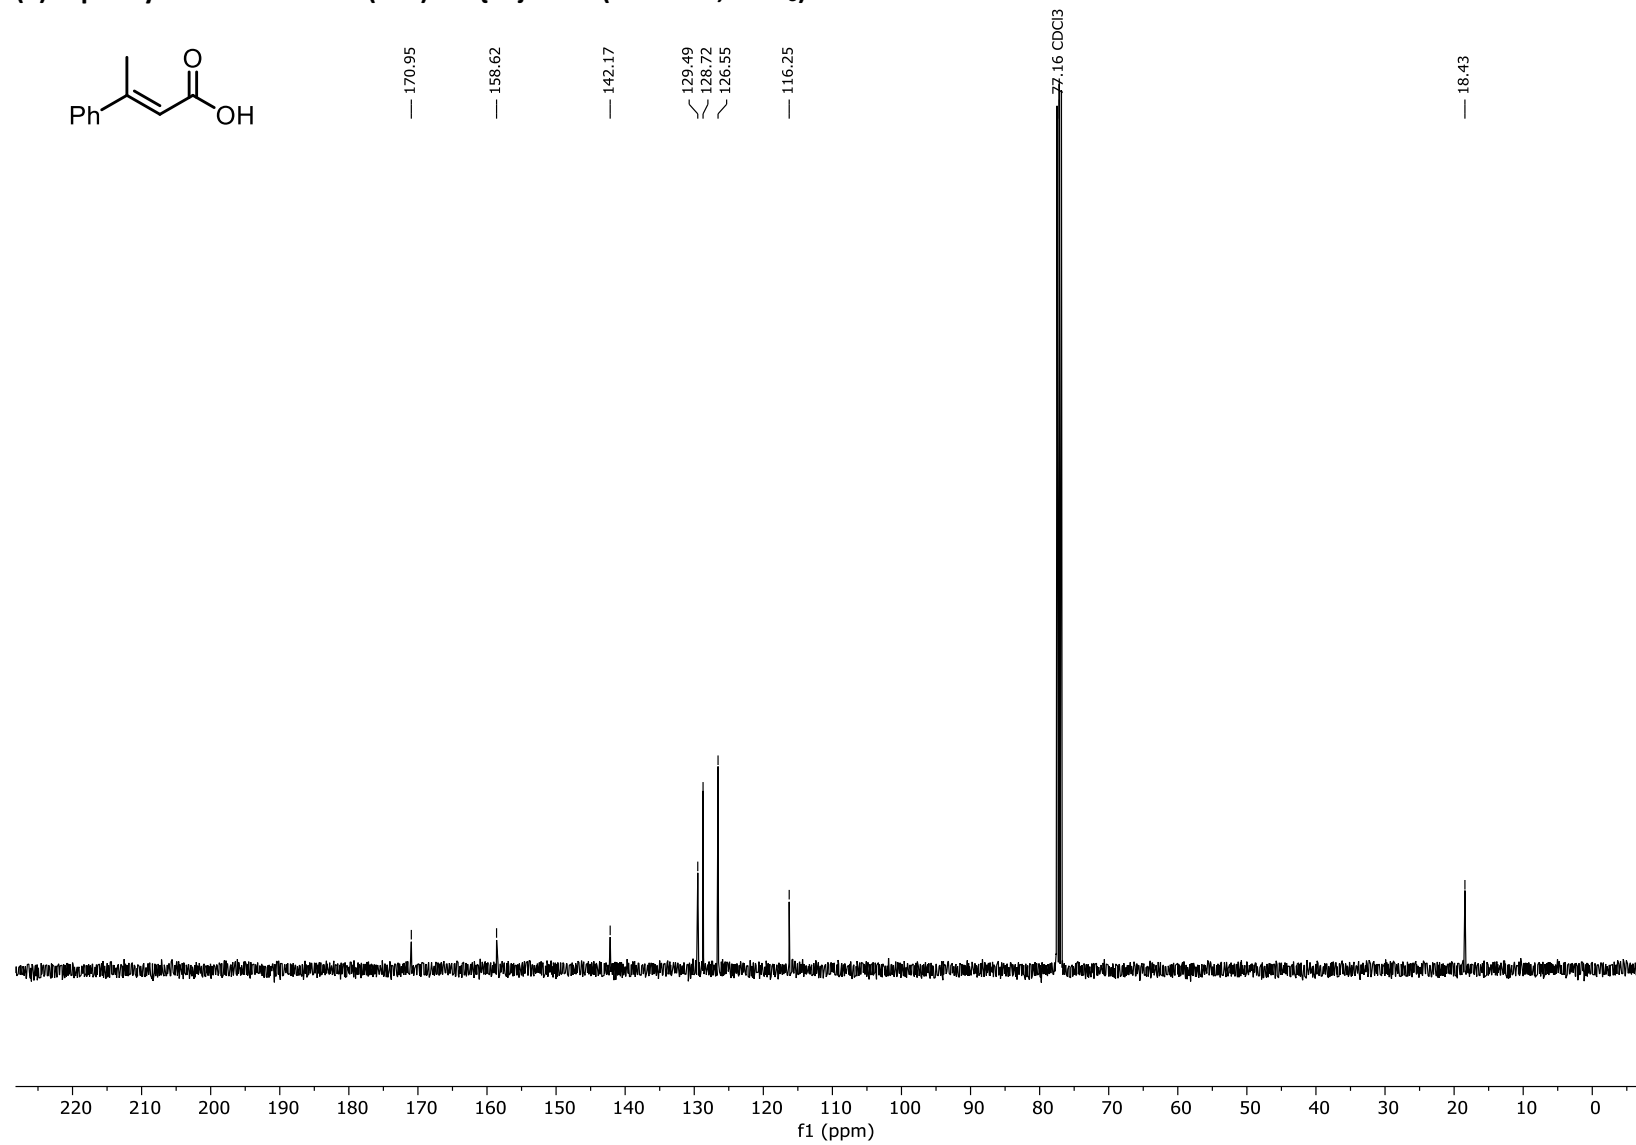

**(S,E)-4-benzyl-3-(3-phenylbut-2-enoyl)oxazolidin-2-one (S18):**  $^1\text{H}$  NMR (300 MHz,  $\text{CDCl}_3$ )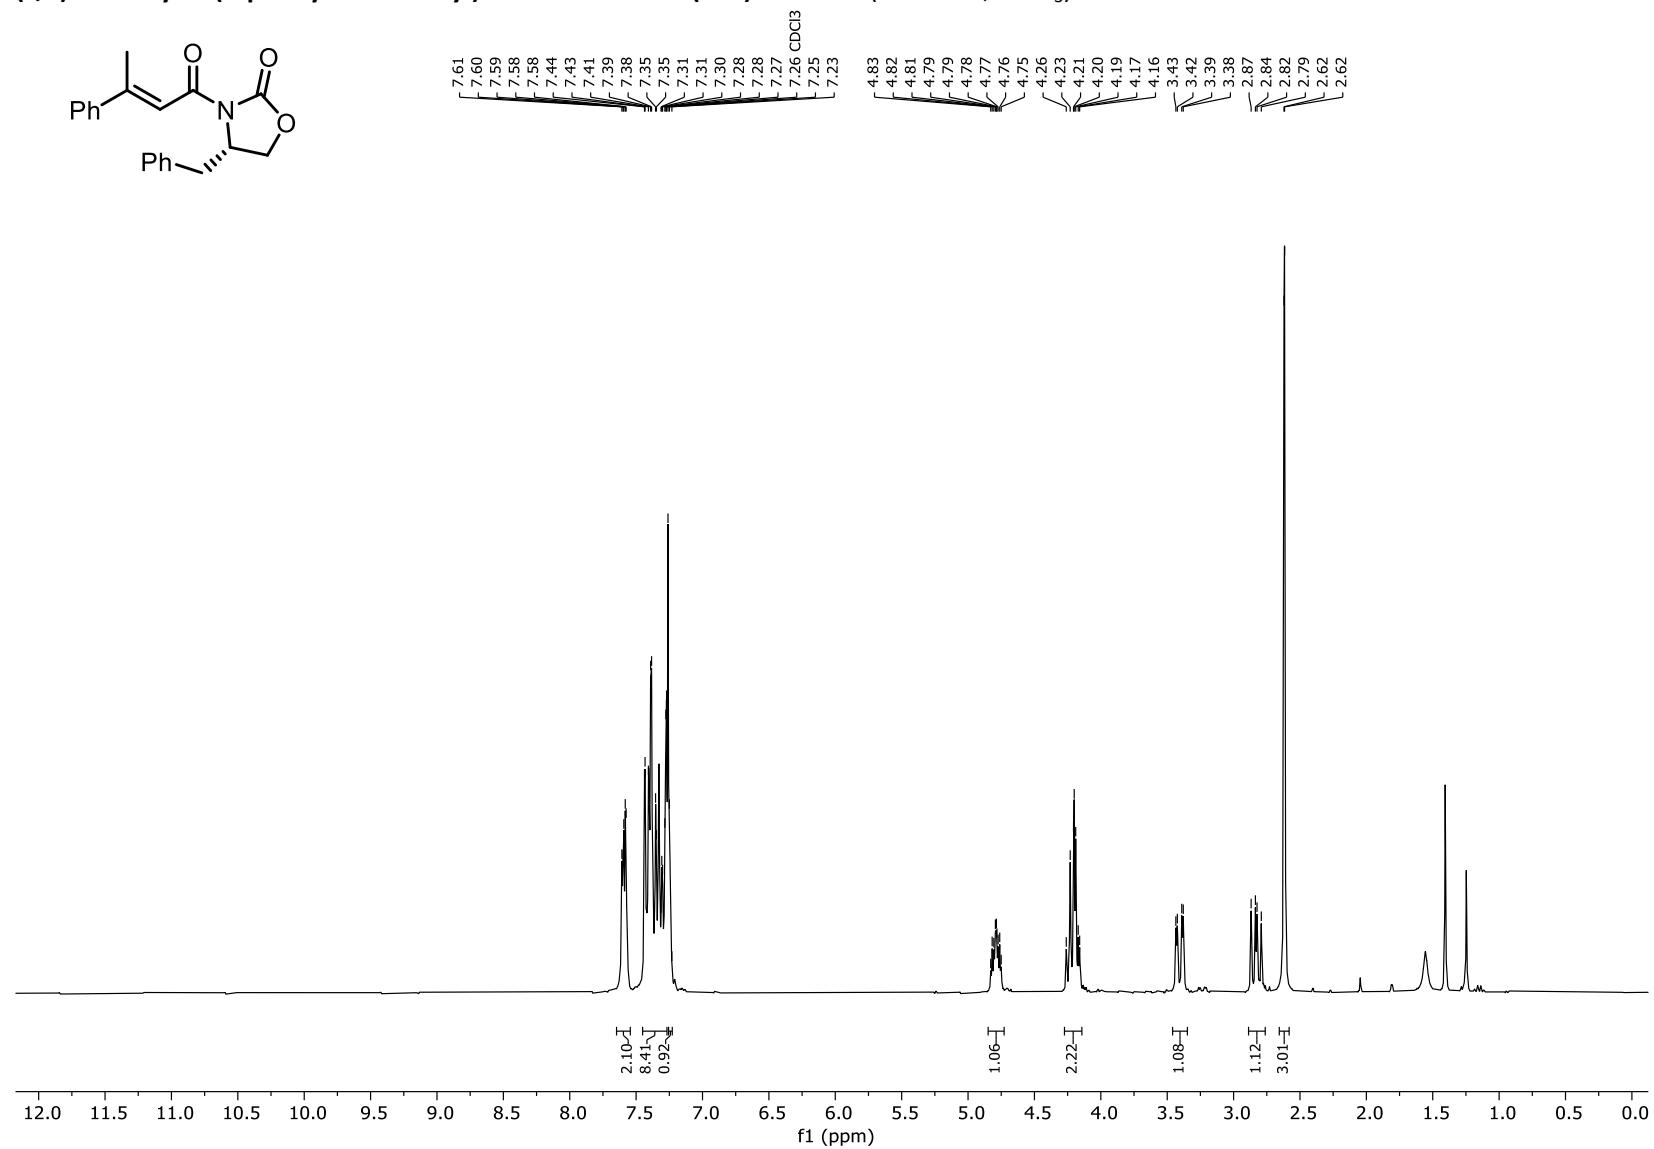

(*S,E*)-4-benzyl-3-(3-phenylbut-2-enoyl)oxazolidin-2-one (**S18**):  $^{13}\text{C}\{^1\text{H}\}$  NMR (75 MHz,  $\text{CDCl}_3$ )

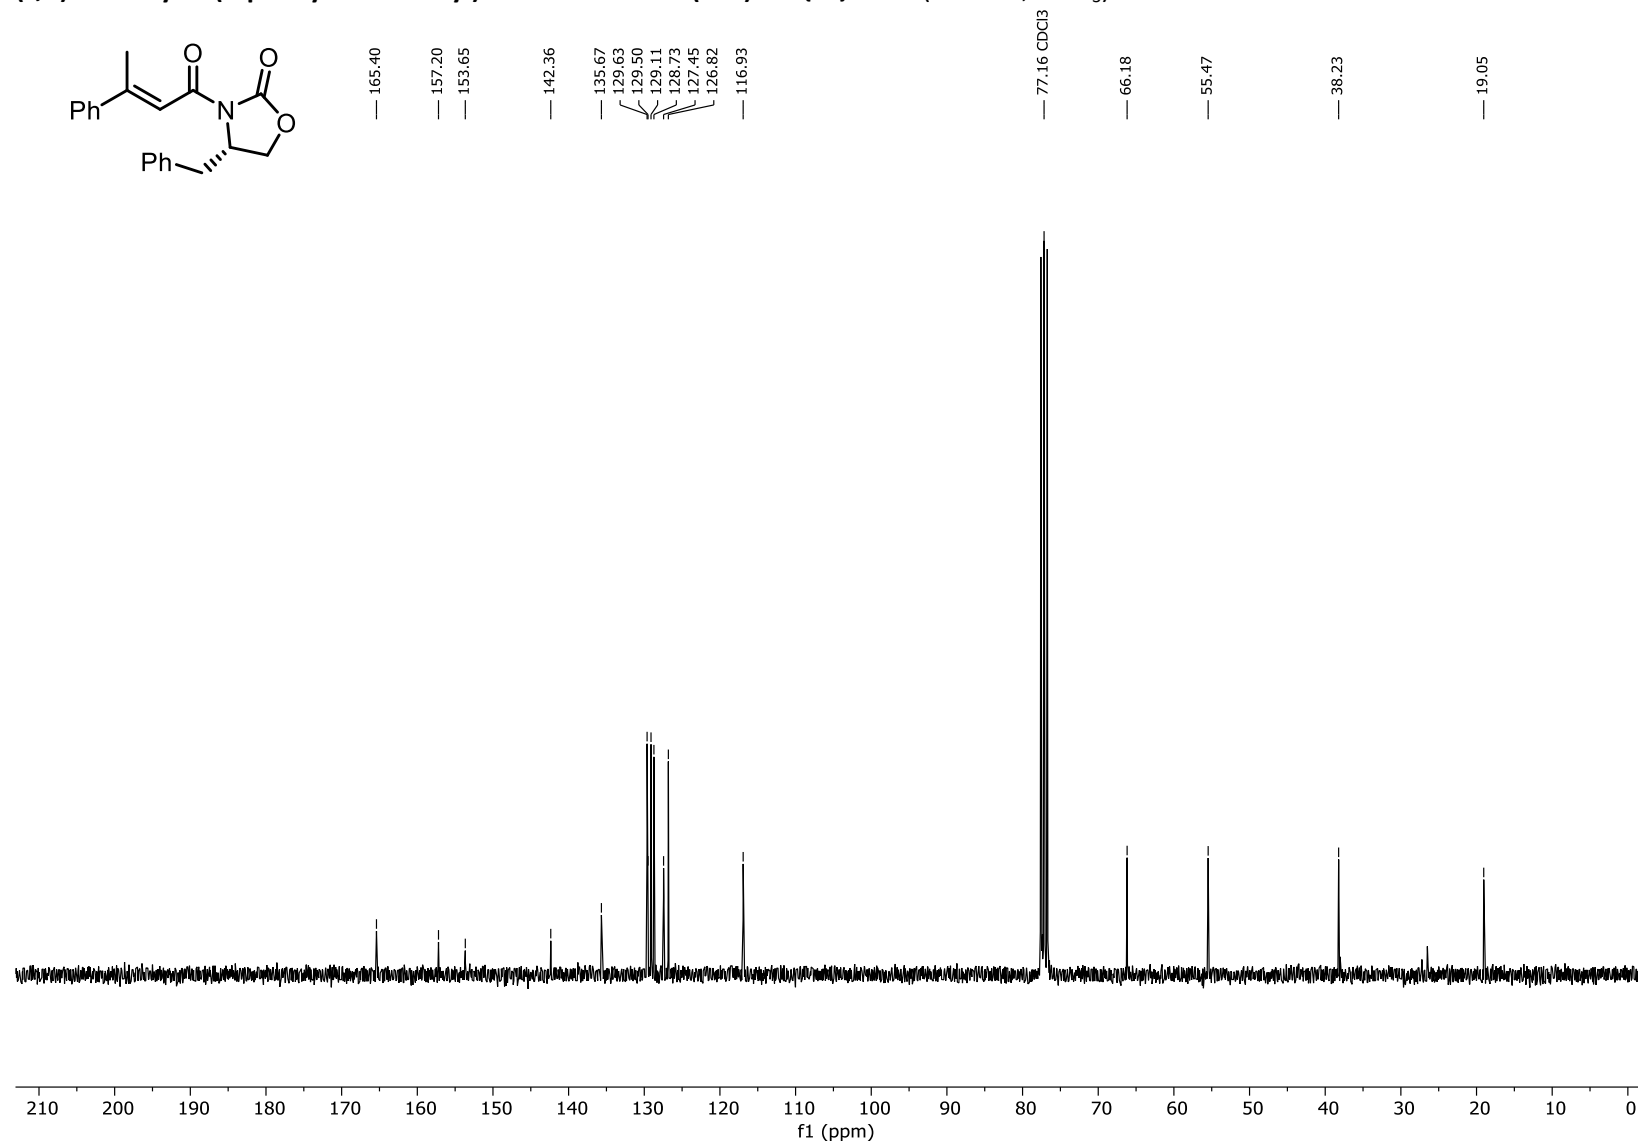

**(S)-4-Benzyl-3-((S)-2-(1-phenylvinyl)pent-4-enoyl)oxazolidin-2-one (1r):**  $^1\text{H}$  NMR (600 MHz,  $\text{CDCl}_3$ )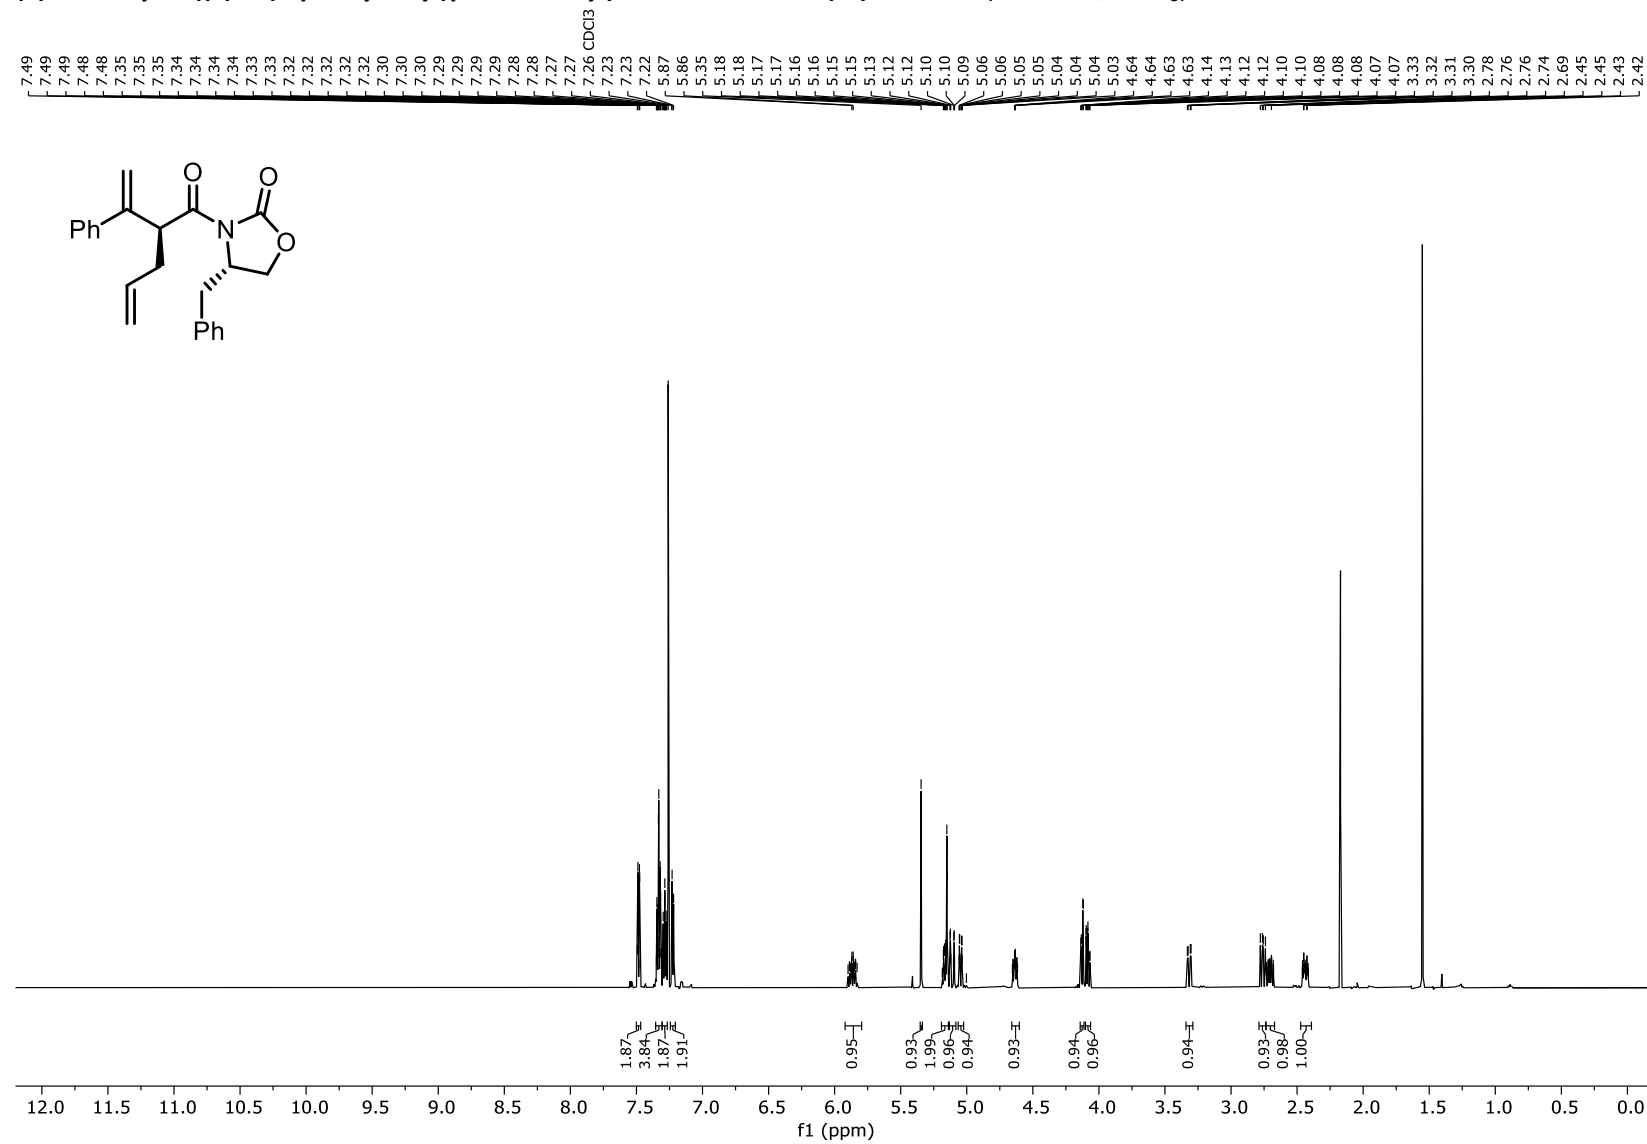

**(S)-4-Benzyl-3-((S)-2-(1-phenylvinyl)pent-4-enoyl)oxazolidin-2-one (1q):**  $^{13}\text{C}\{^1\text{H}\}$  NMR (126 MHz,  $\text{CDCl}_3$ )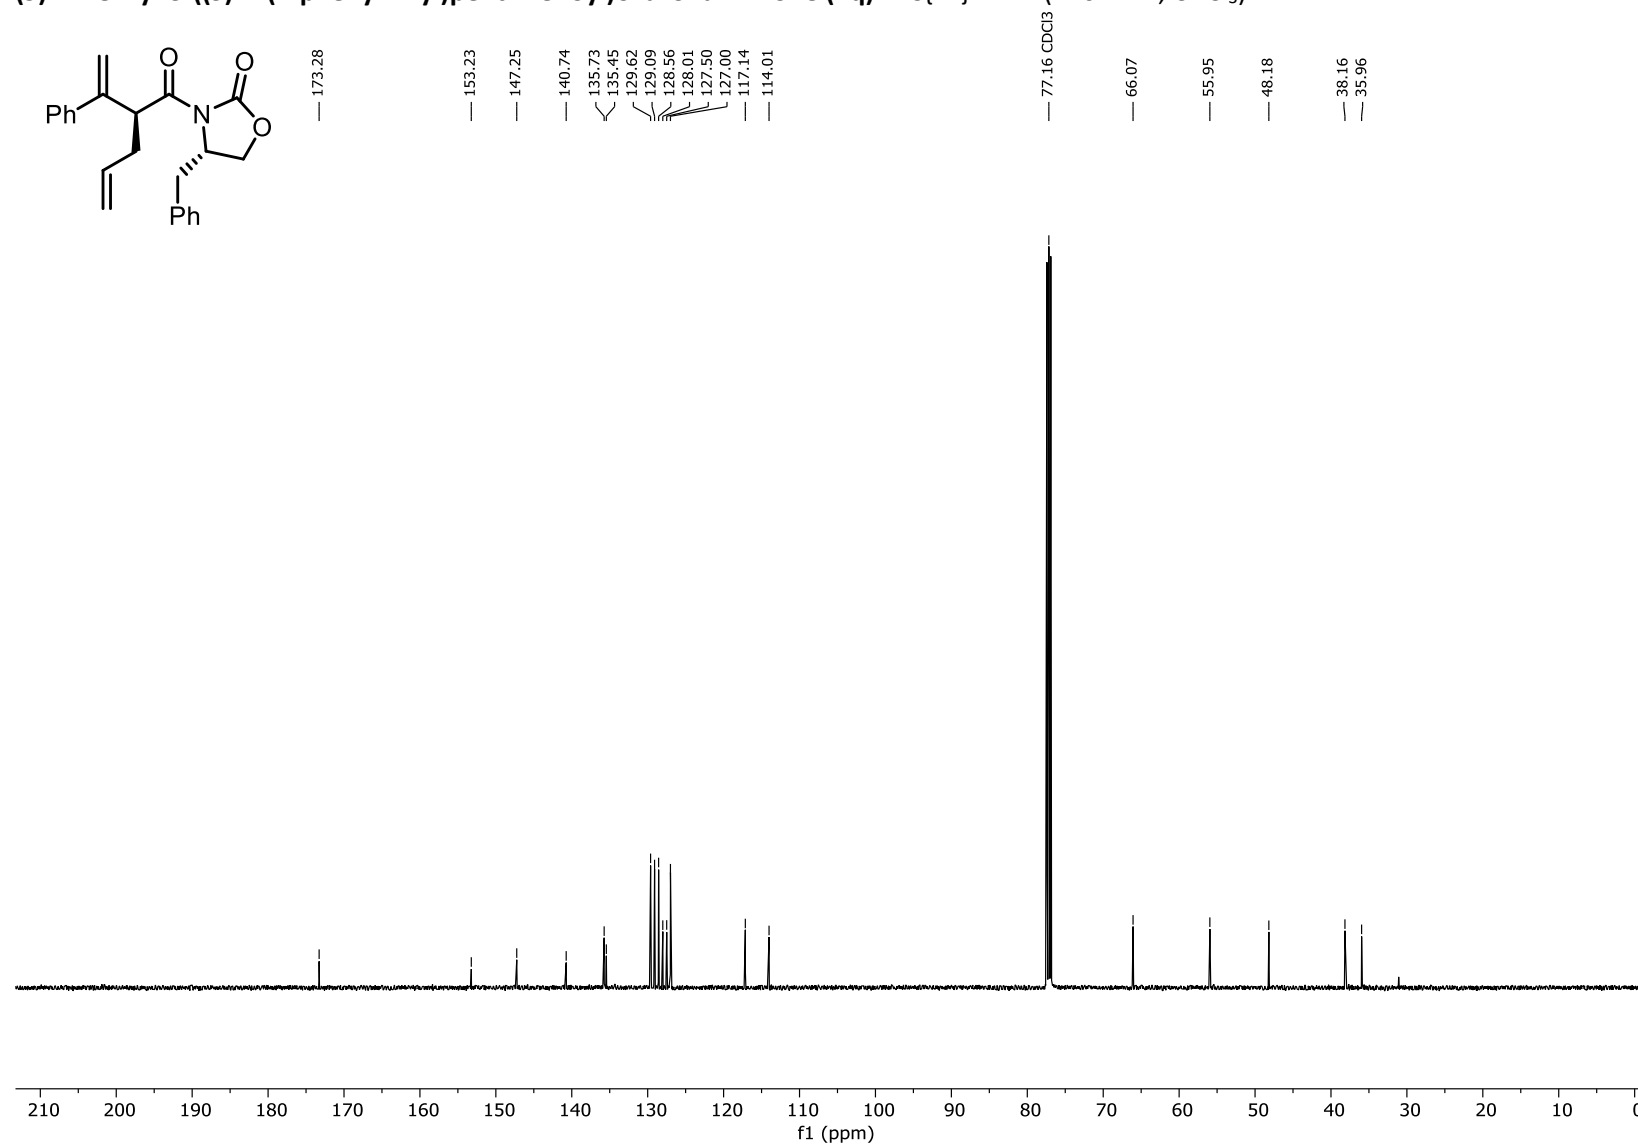



**(S)-4-Benzyl-3-((S)-2-(1-phenylvinyl)pent-4-enyl)oxazolidin-2-one (1q):** NOESY (600 MHz, CDCl<sub>3</sub>)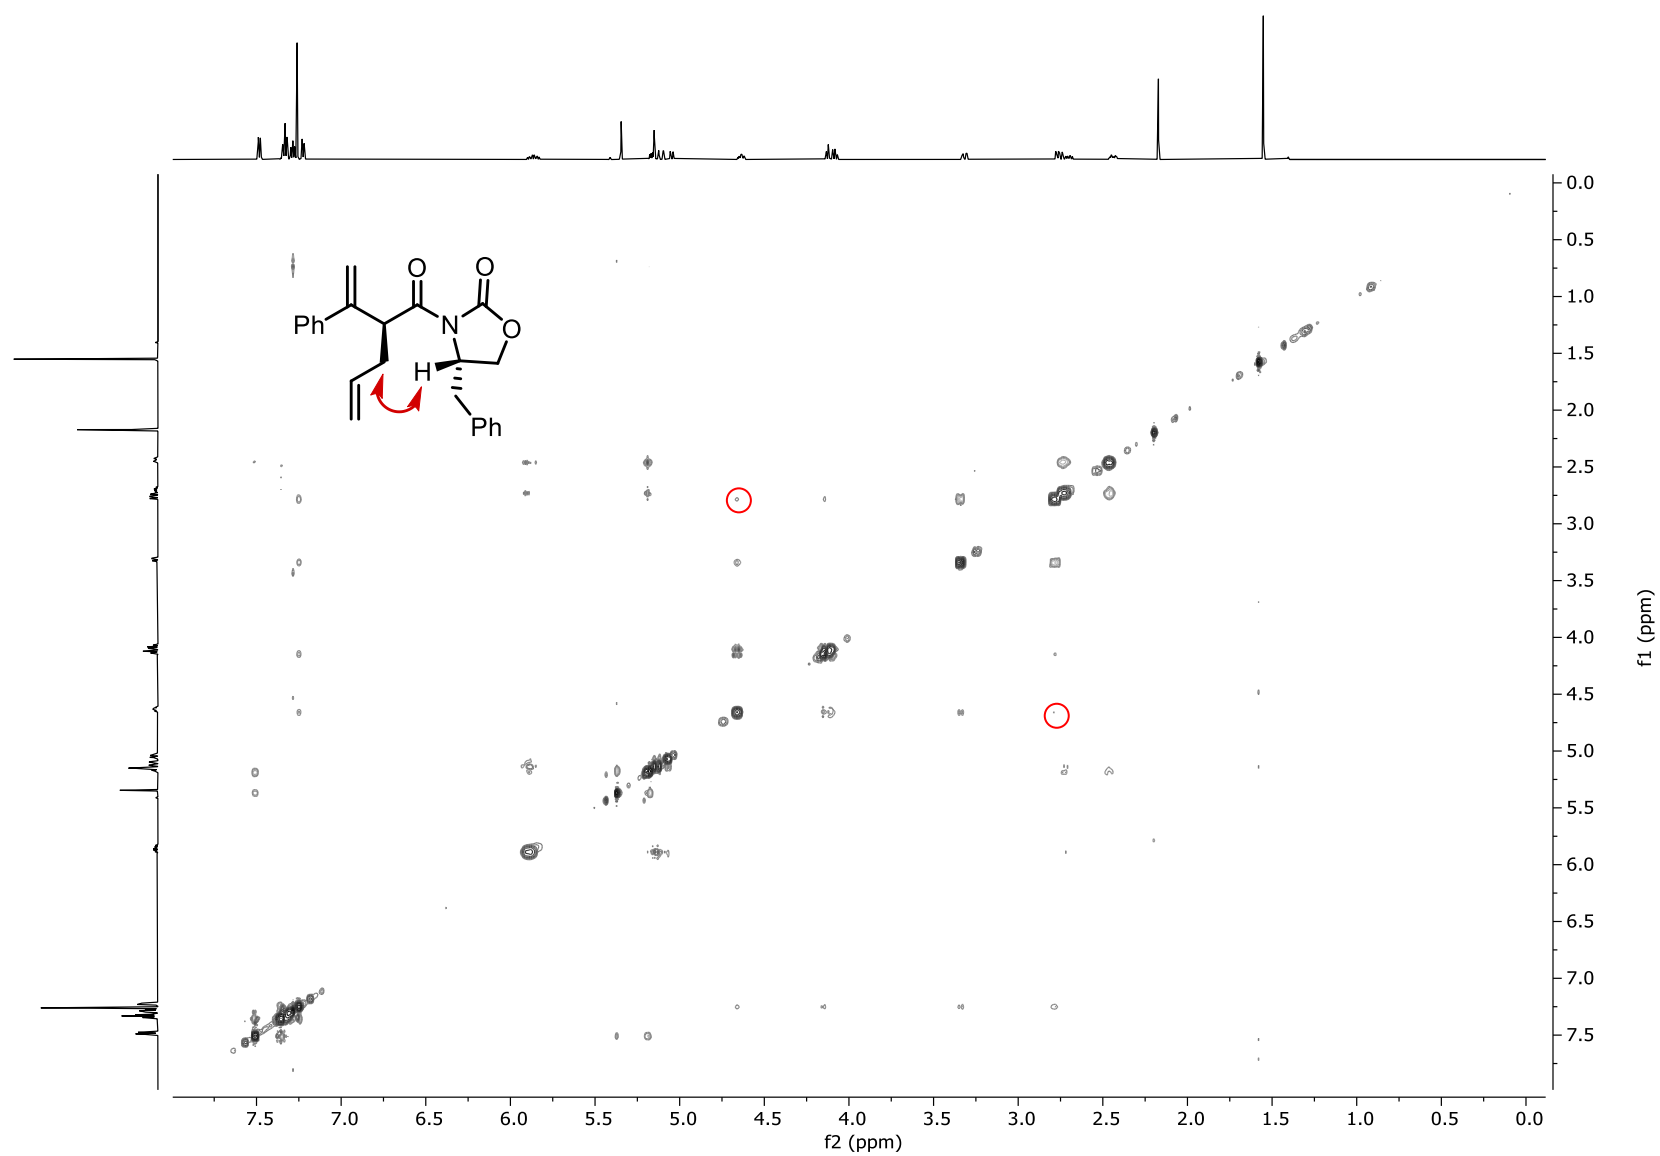

**(E)-3-(4-fluorophenyl)-1-phenylprop-2-en-1-one (S19):**  $^1\text{H}$  NMR (300 MHz,  $\text{CDCl}_3$ )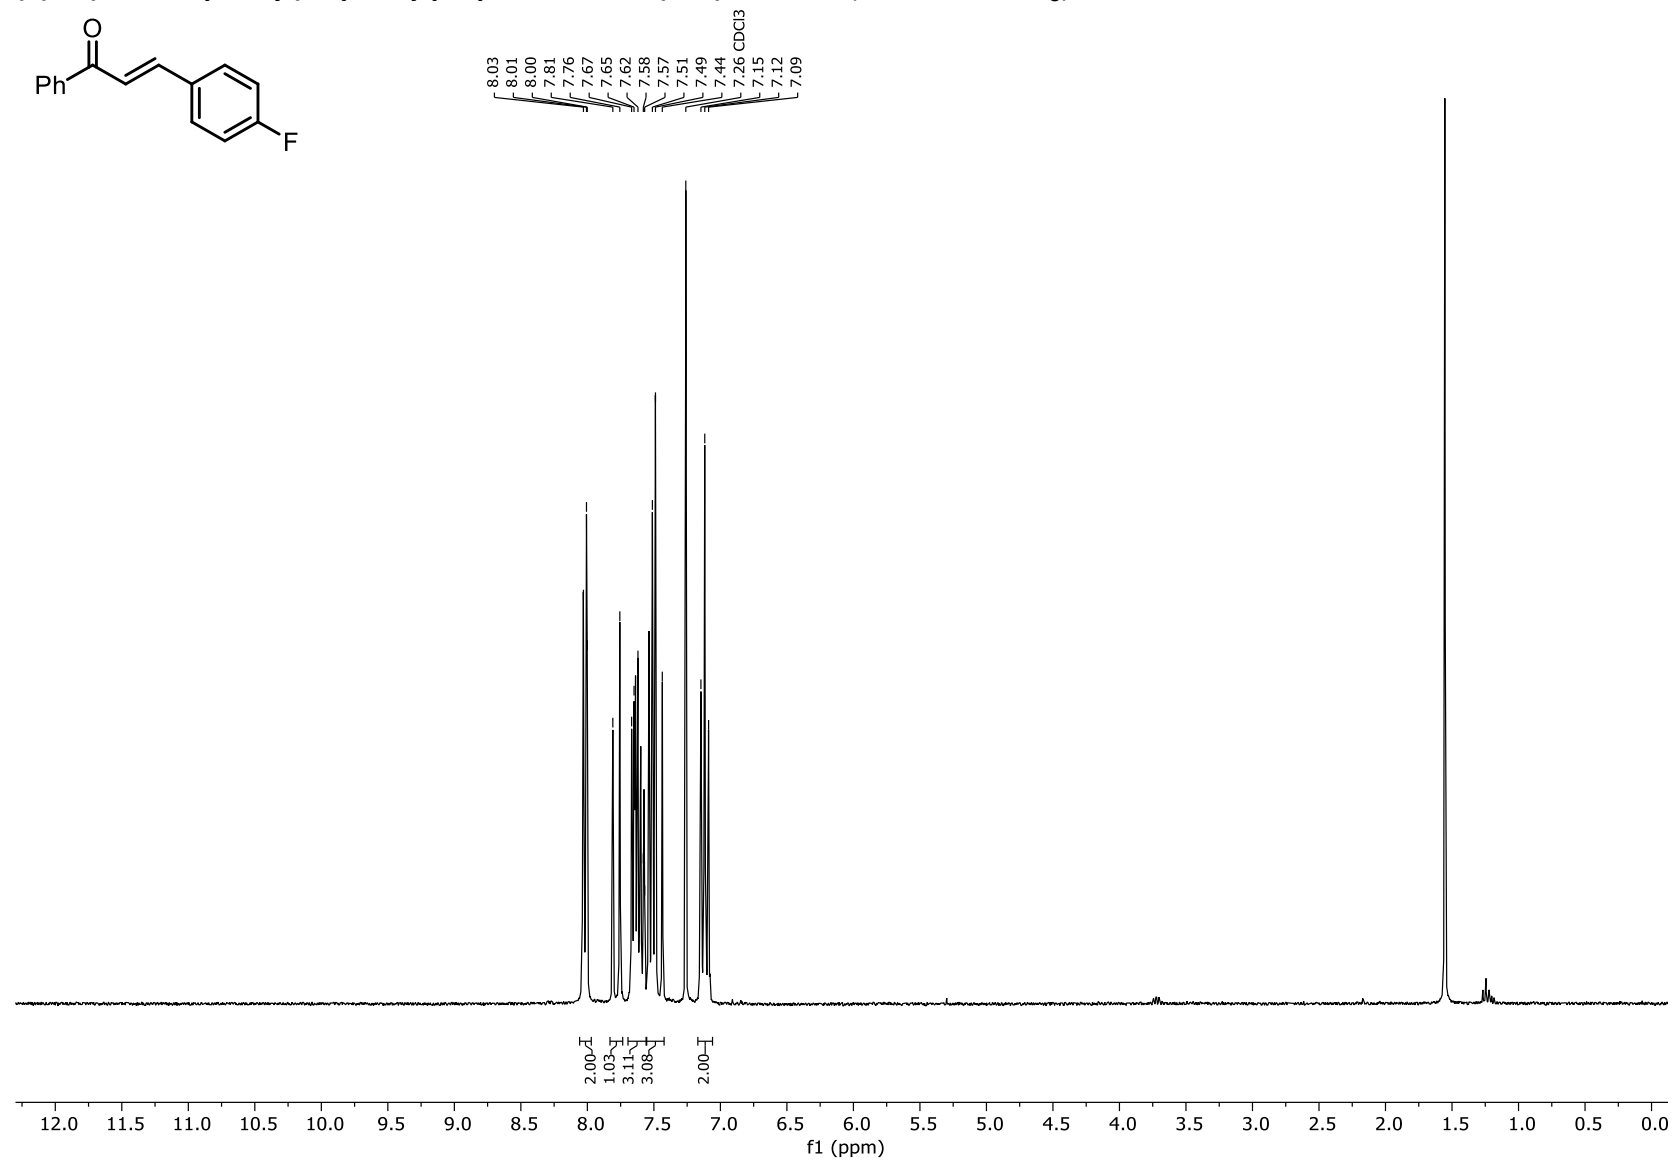

**(E)-3-(4-fluorophenyl)-1-phenylprop-2-en-1-one (S19):**  $^{13}\text{C}\{^1\text{H}\}$  NMR (101 MHz,  $\text{CDCl}_3$ )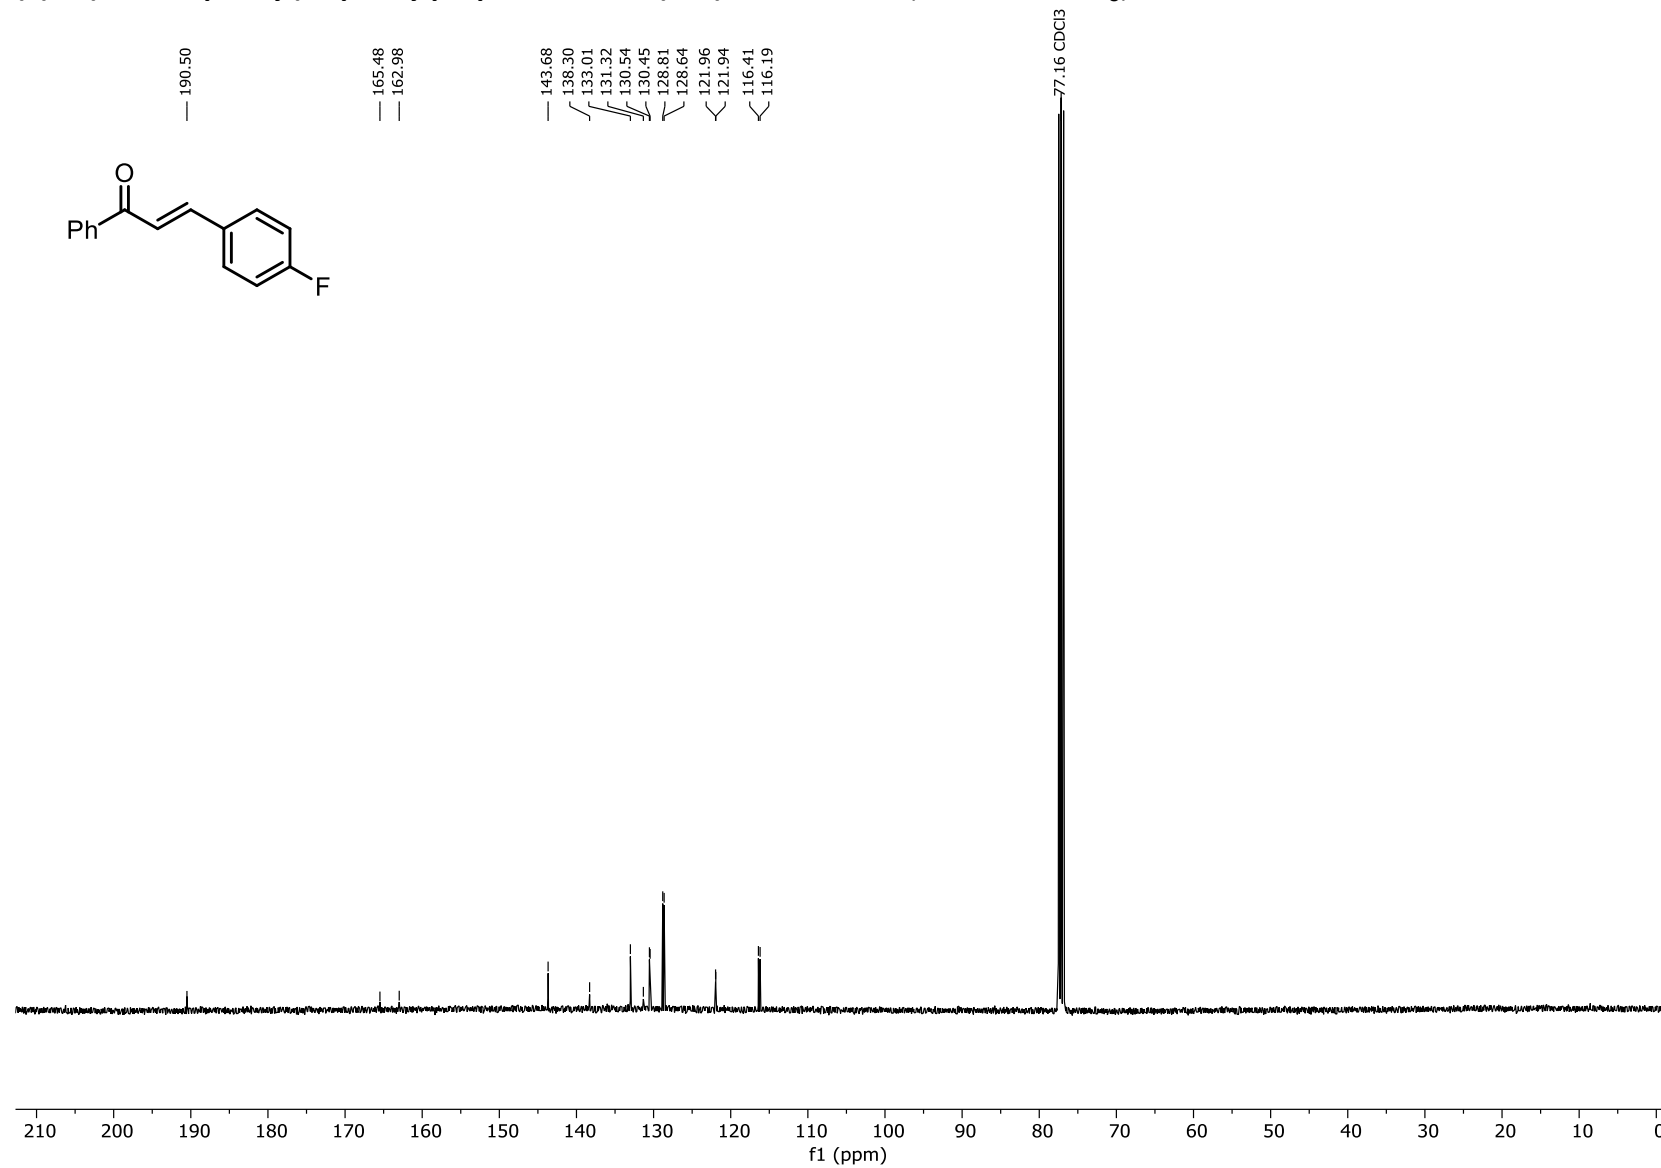

(E)-3-(4-fluorophenyl)-1-phenylprop-2-en-1-one (S19):  $^{19}\text{F}\{^1\text{H}\}$  NMR (282 MHz,  $\text{CDCl}_3$ )

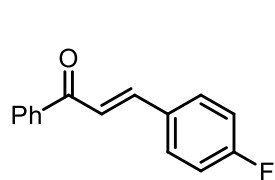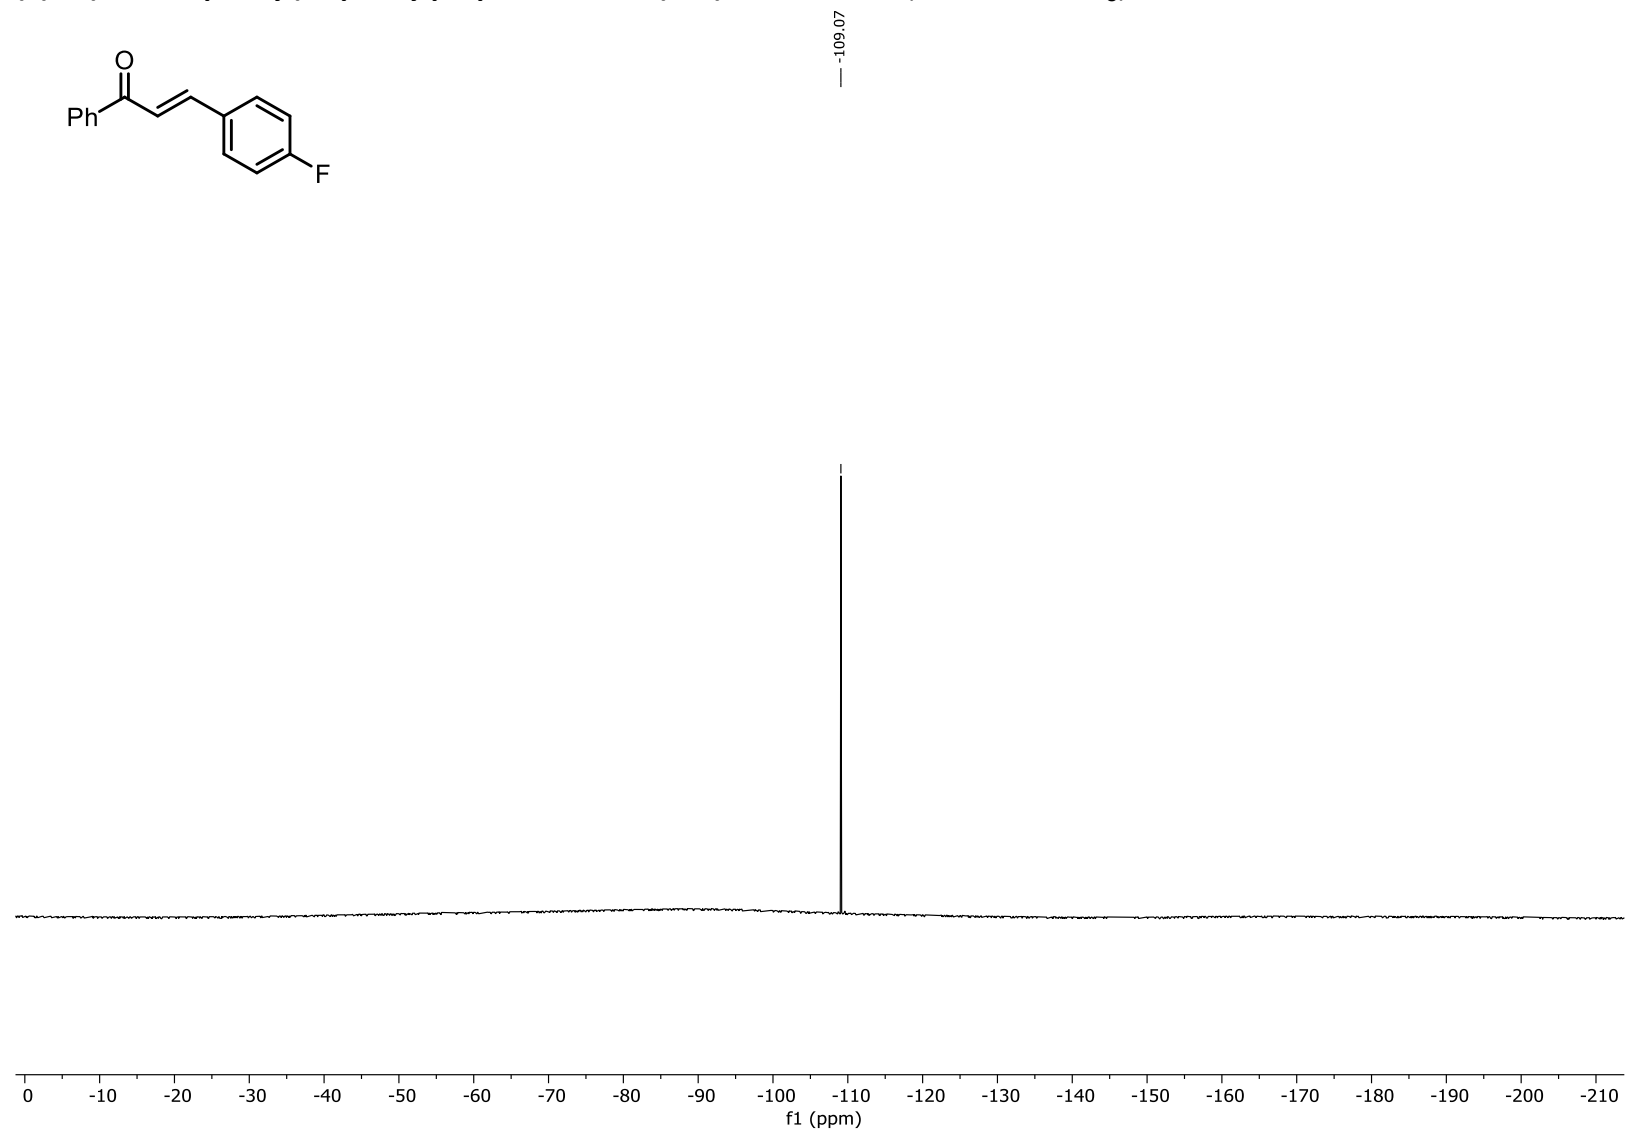

**3-(4-Fluorophenyl)-1-phenylpent-4-en-1-one (S20):**  $^1\text{H}$  NMR (300 MHz,  $\text{CDCl}_3$ )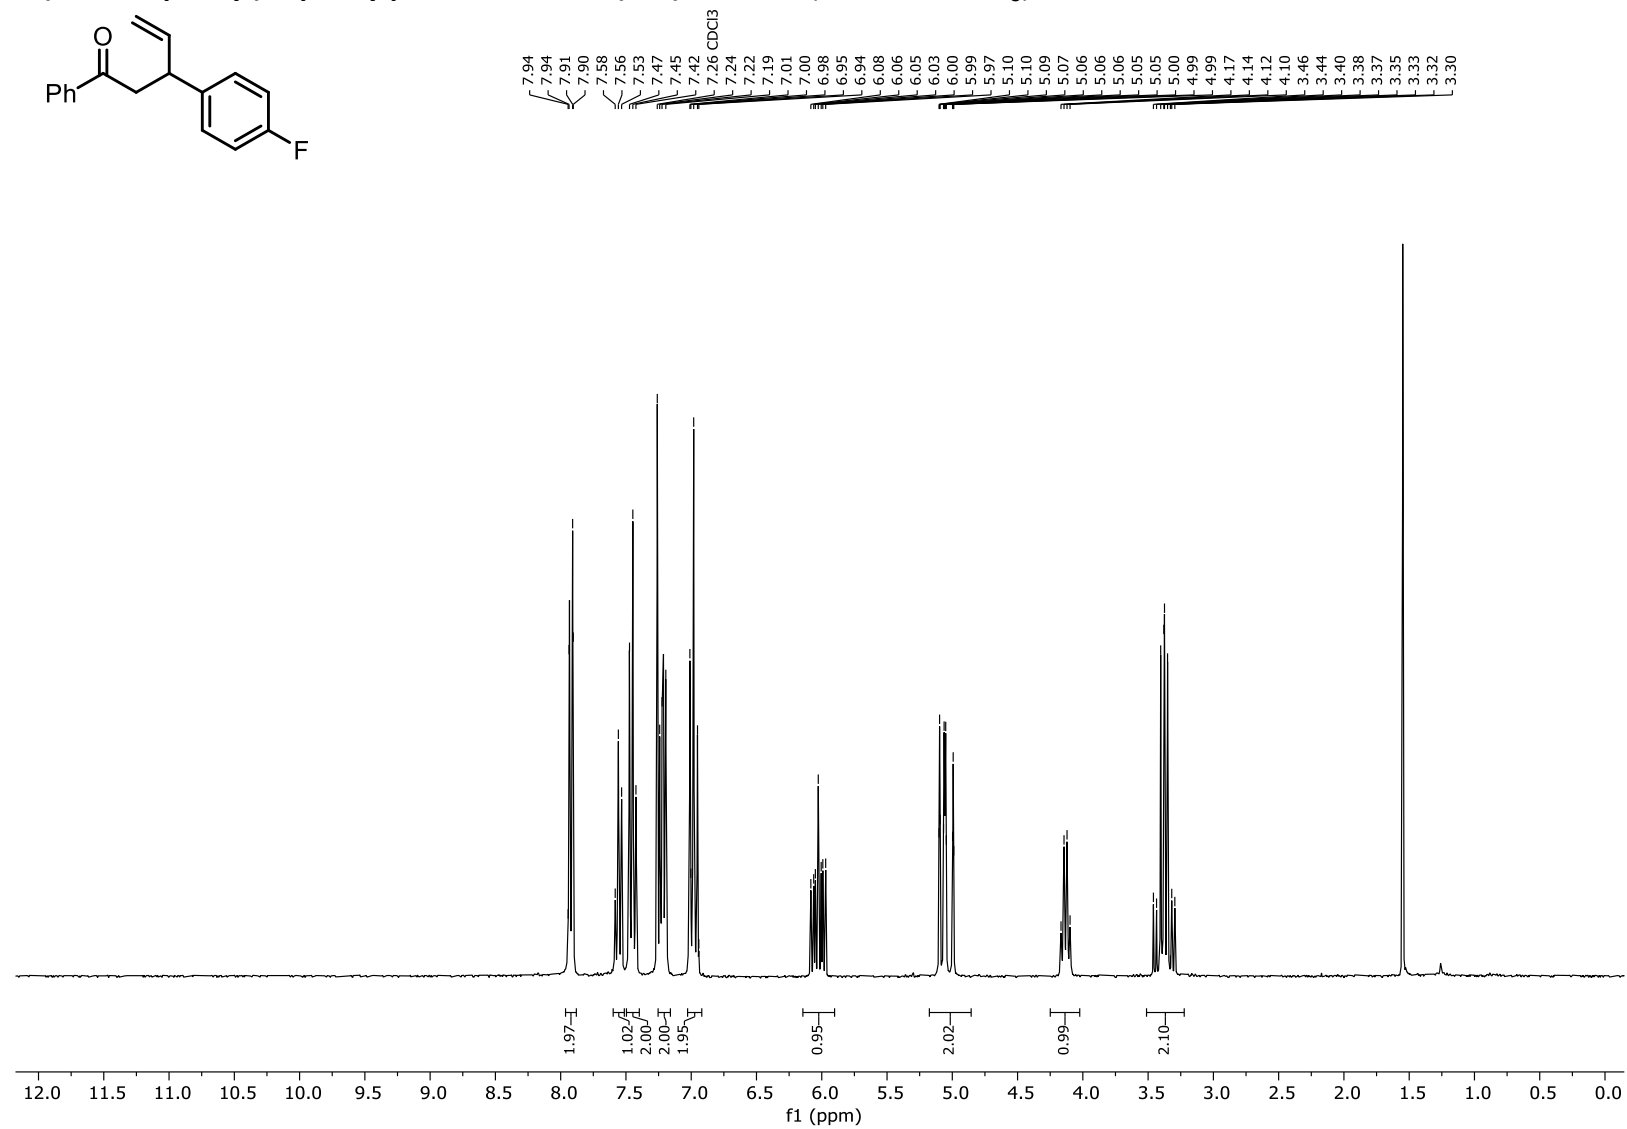

**3-(4-Fluorophenyl)-1-phenylpent-4-en-1-one (S20):**  $^{13}\text{C}\{^1\text{H}\}$  NMR (101 MHz,  $\text{CDCl}_3$ )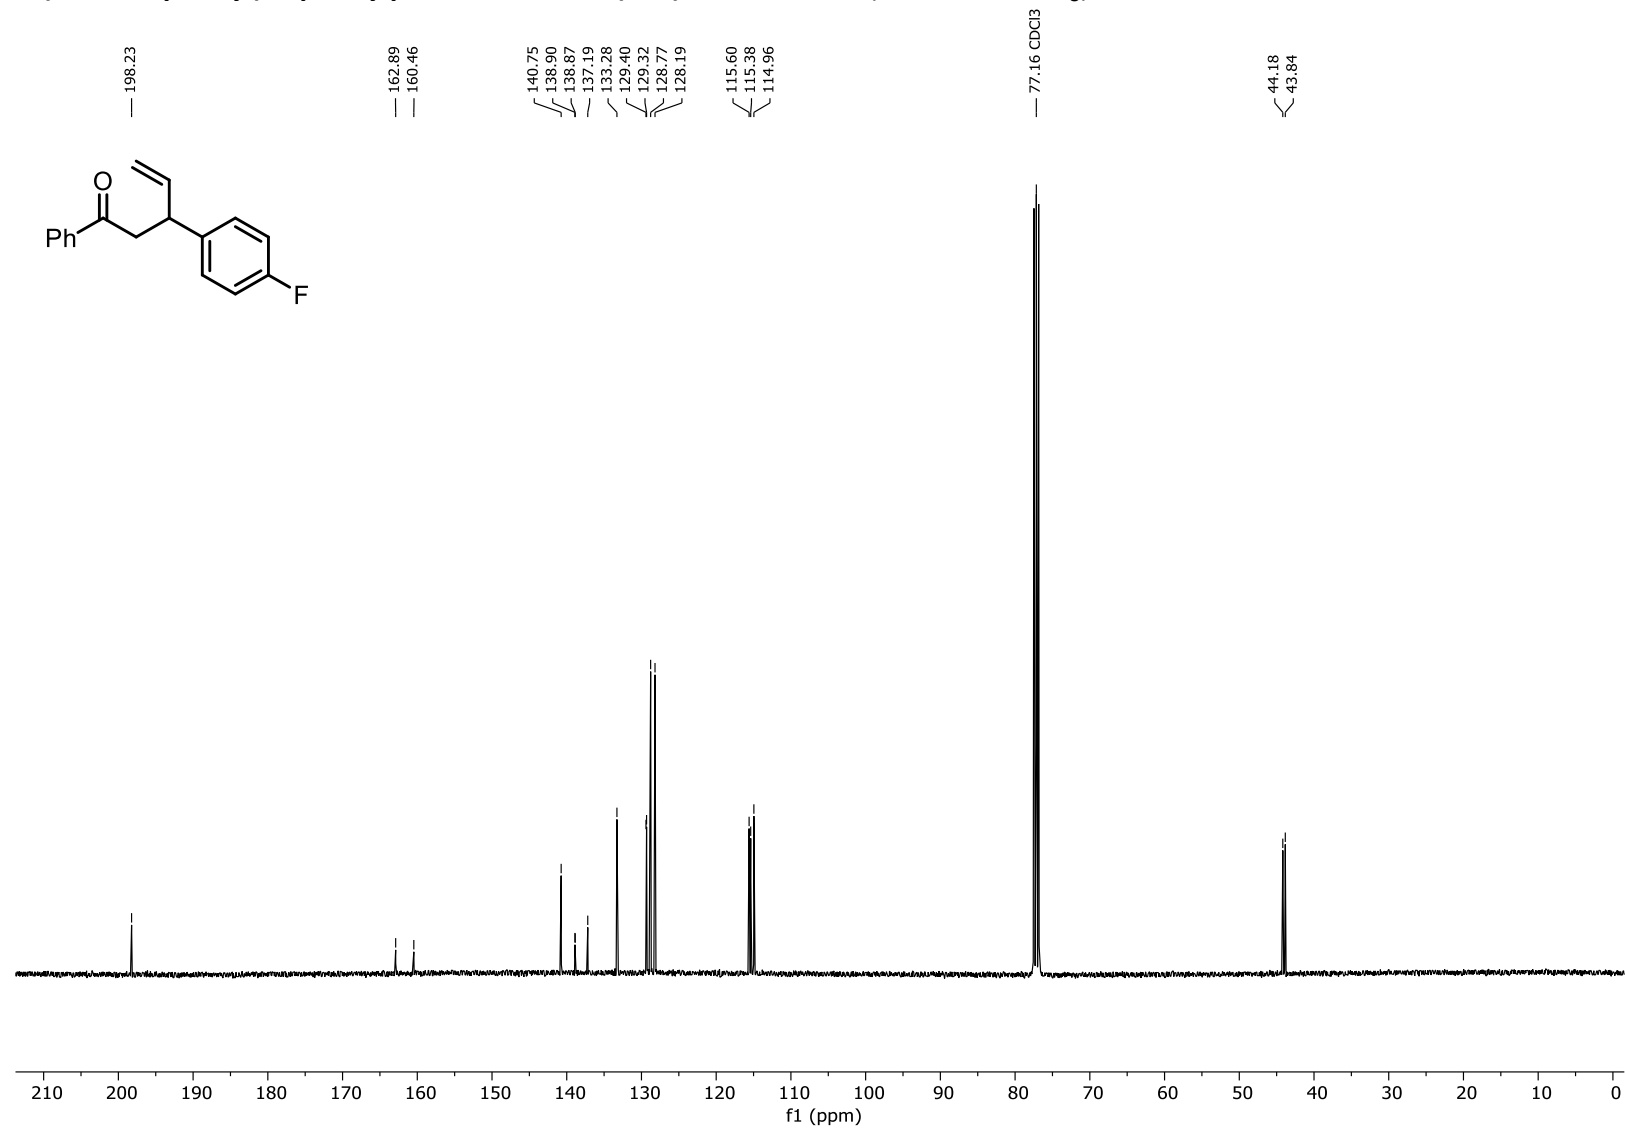

**3-(4-Fluorophenyl)-1-phenylpent-4-en-1-one (S20):**  $^{19}\text{F}\{^1\text{H}\}$  NMR (282 MHz,  $\text{CDCl}_3$ )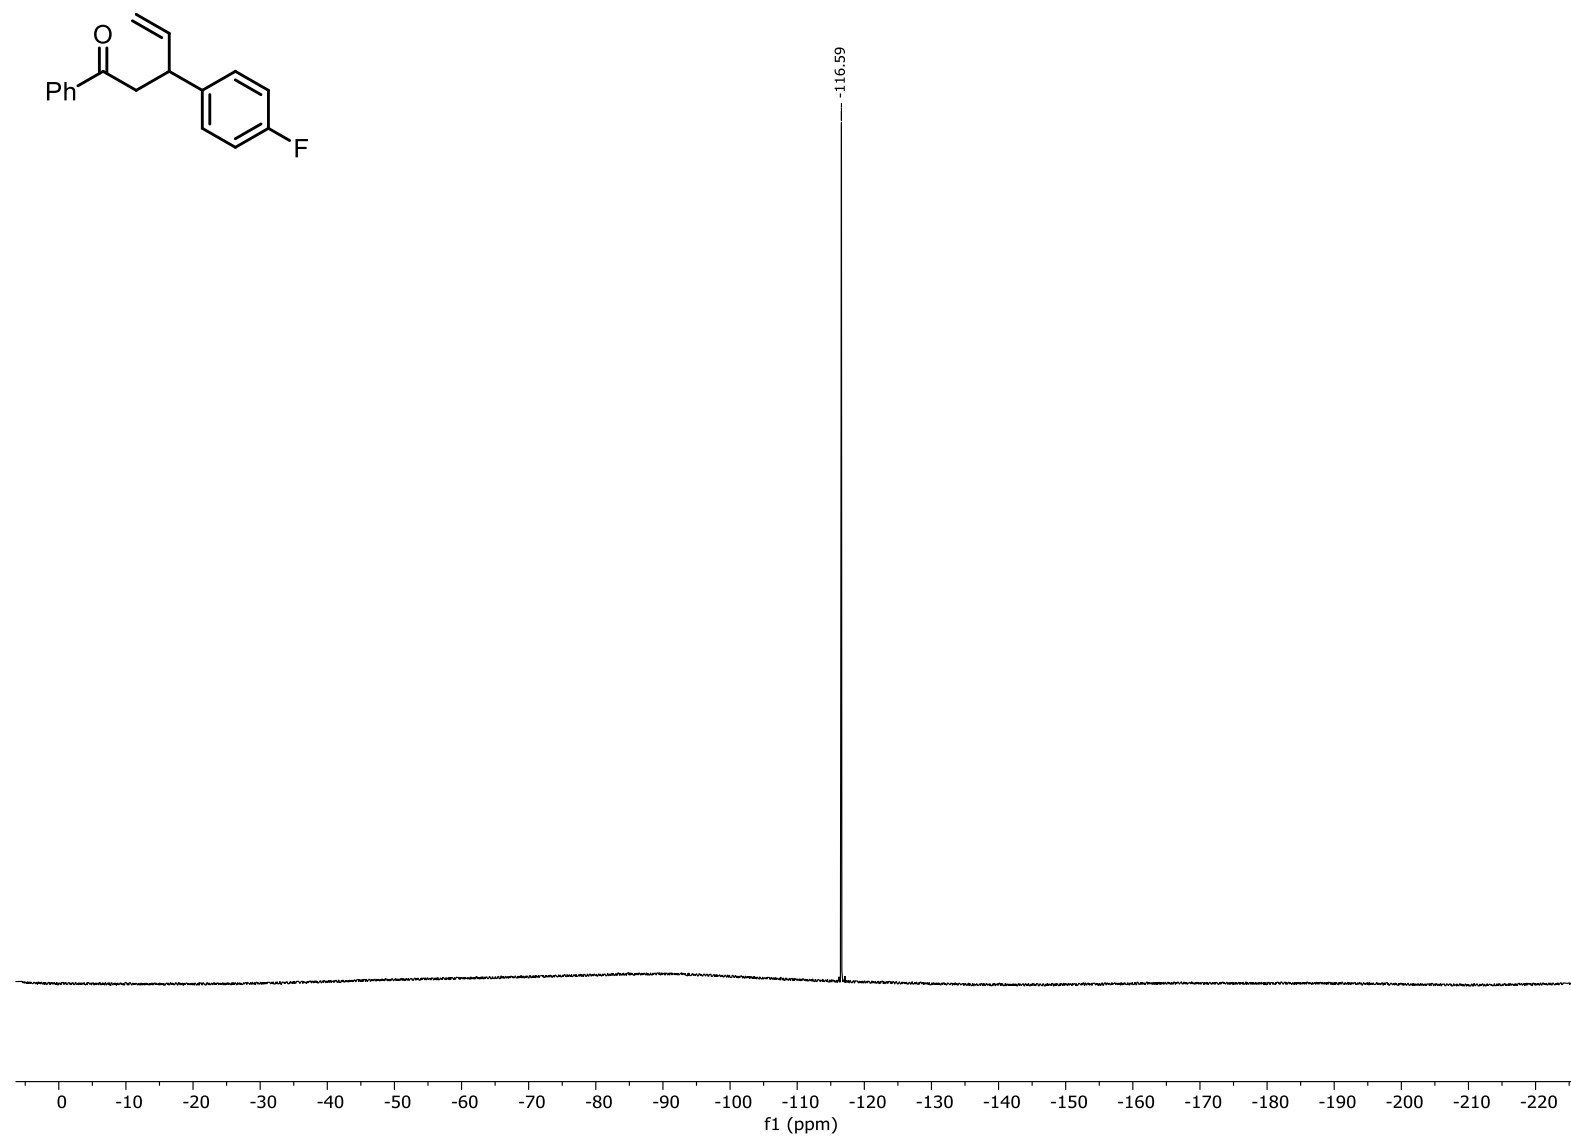

**1-Fluoro-4-(5-phenylhexa-1,5-dien-3-yl)benzene (S20):  $^1\text{H}$  NMR (300 MHz,  $\text{CDCl}_3$ )**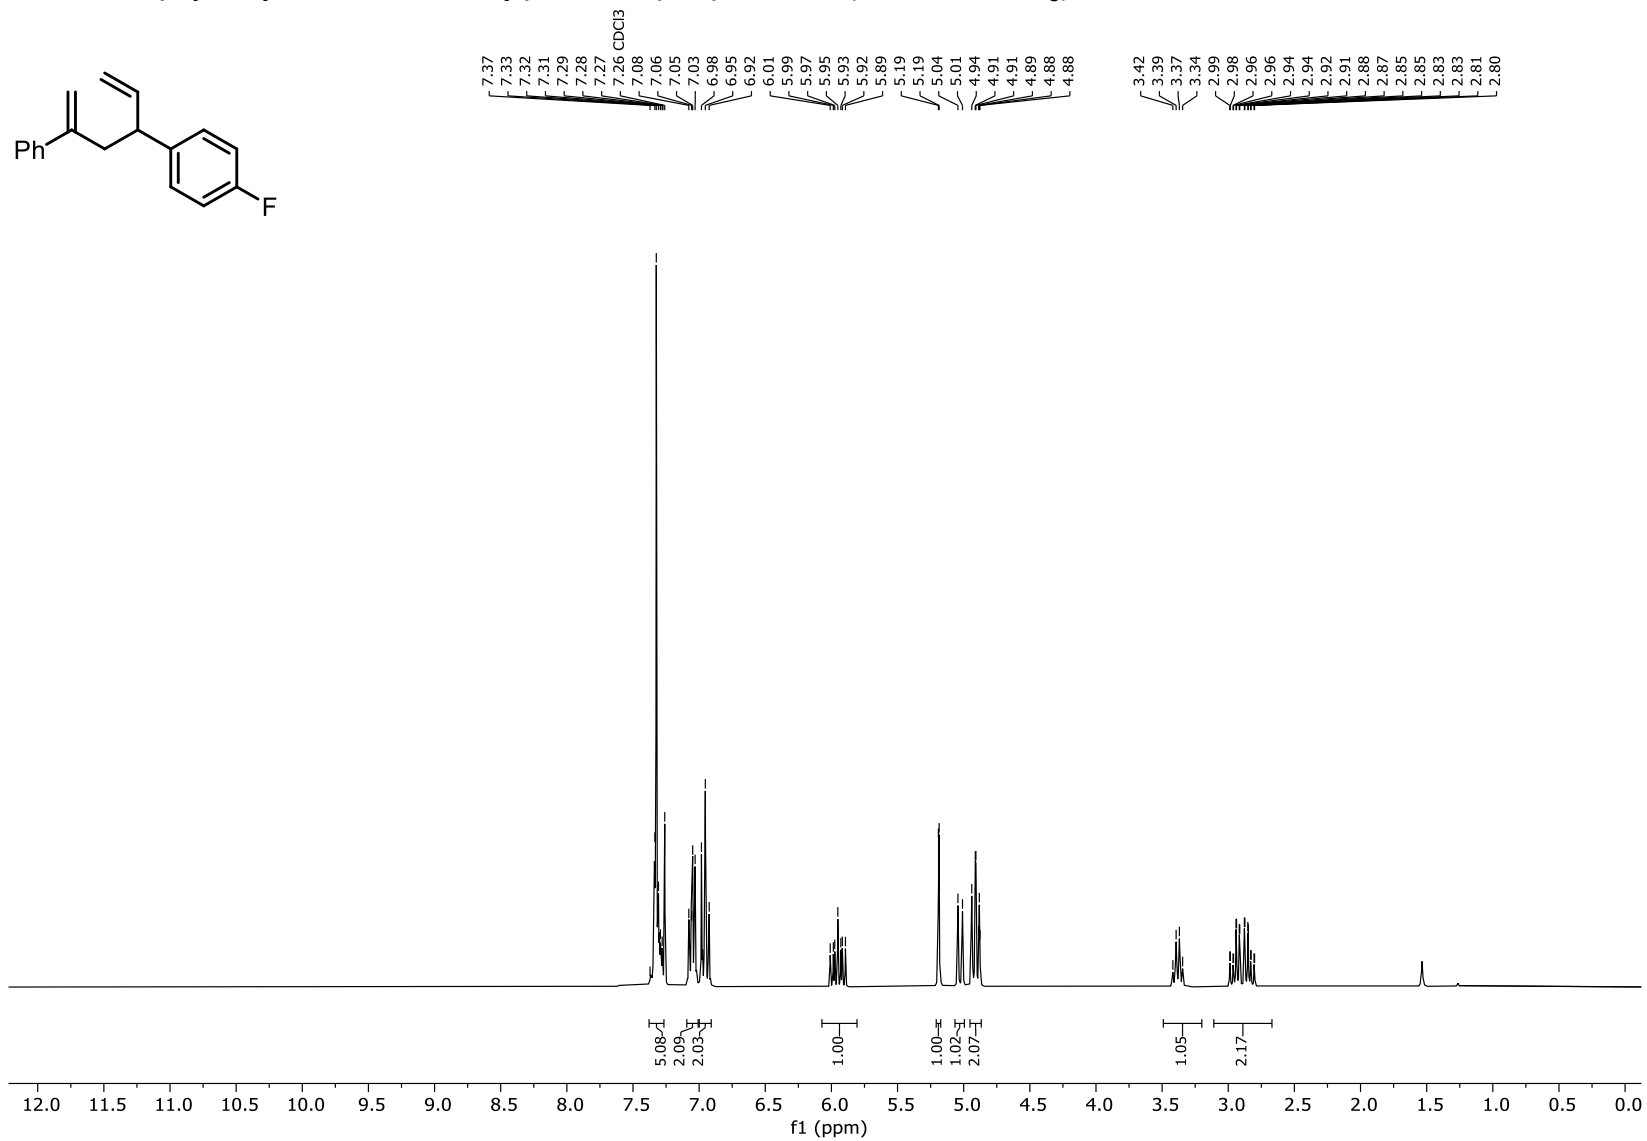



**1-Fluoro-4-(5-phenylhexa-1,5-dien-3-yl)benzene (1s):**  $^{13}\text{C}\{^1\text{H}\}$  NMR (101 MHz,  $\text{CDCl}_3$ )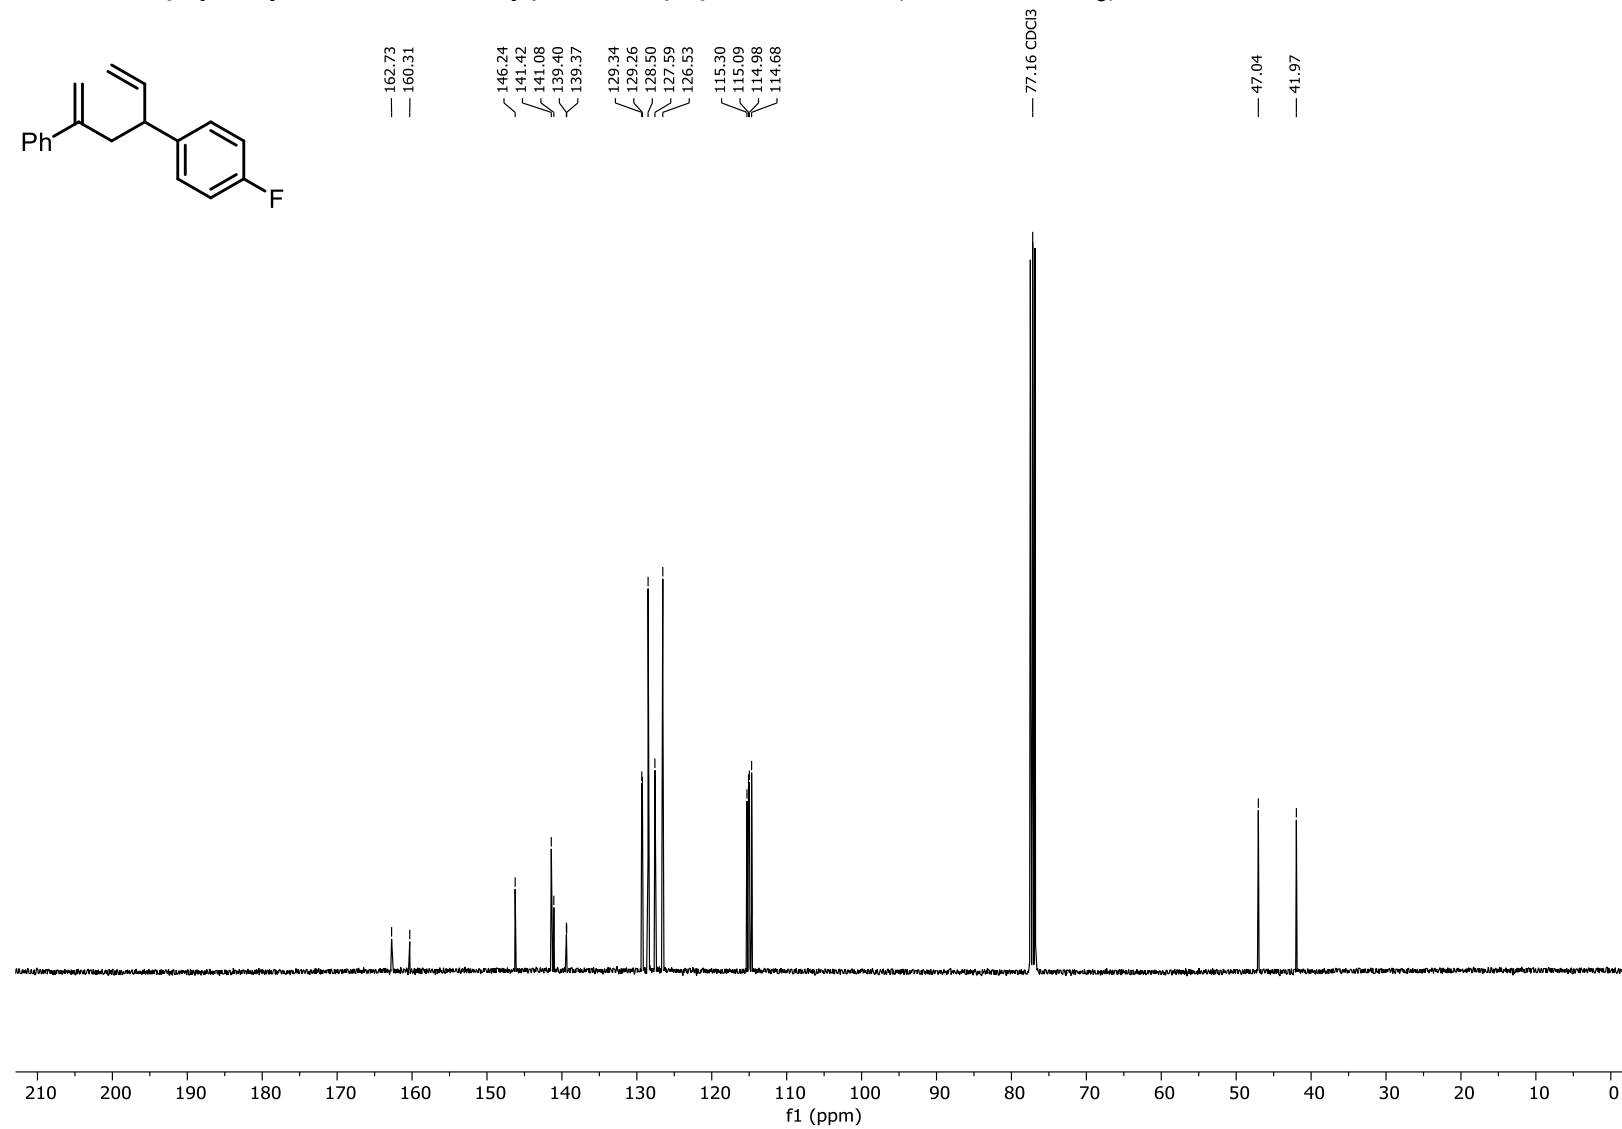

**1-Fluoro-4-(5-phenylhexa-1,5-dien-3-yl)benzene (1s):**  $^{19}\text{F}\{^1\text{H}\}$  NMR (282 MHz,  $\text{CDCl}_3$ )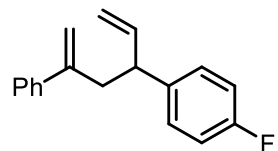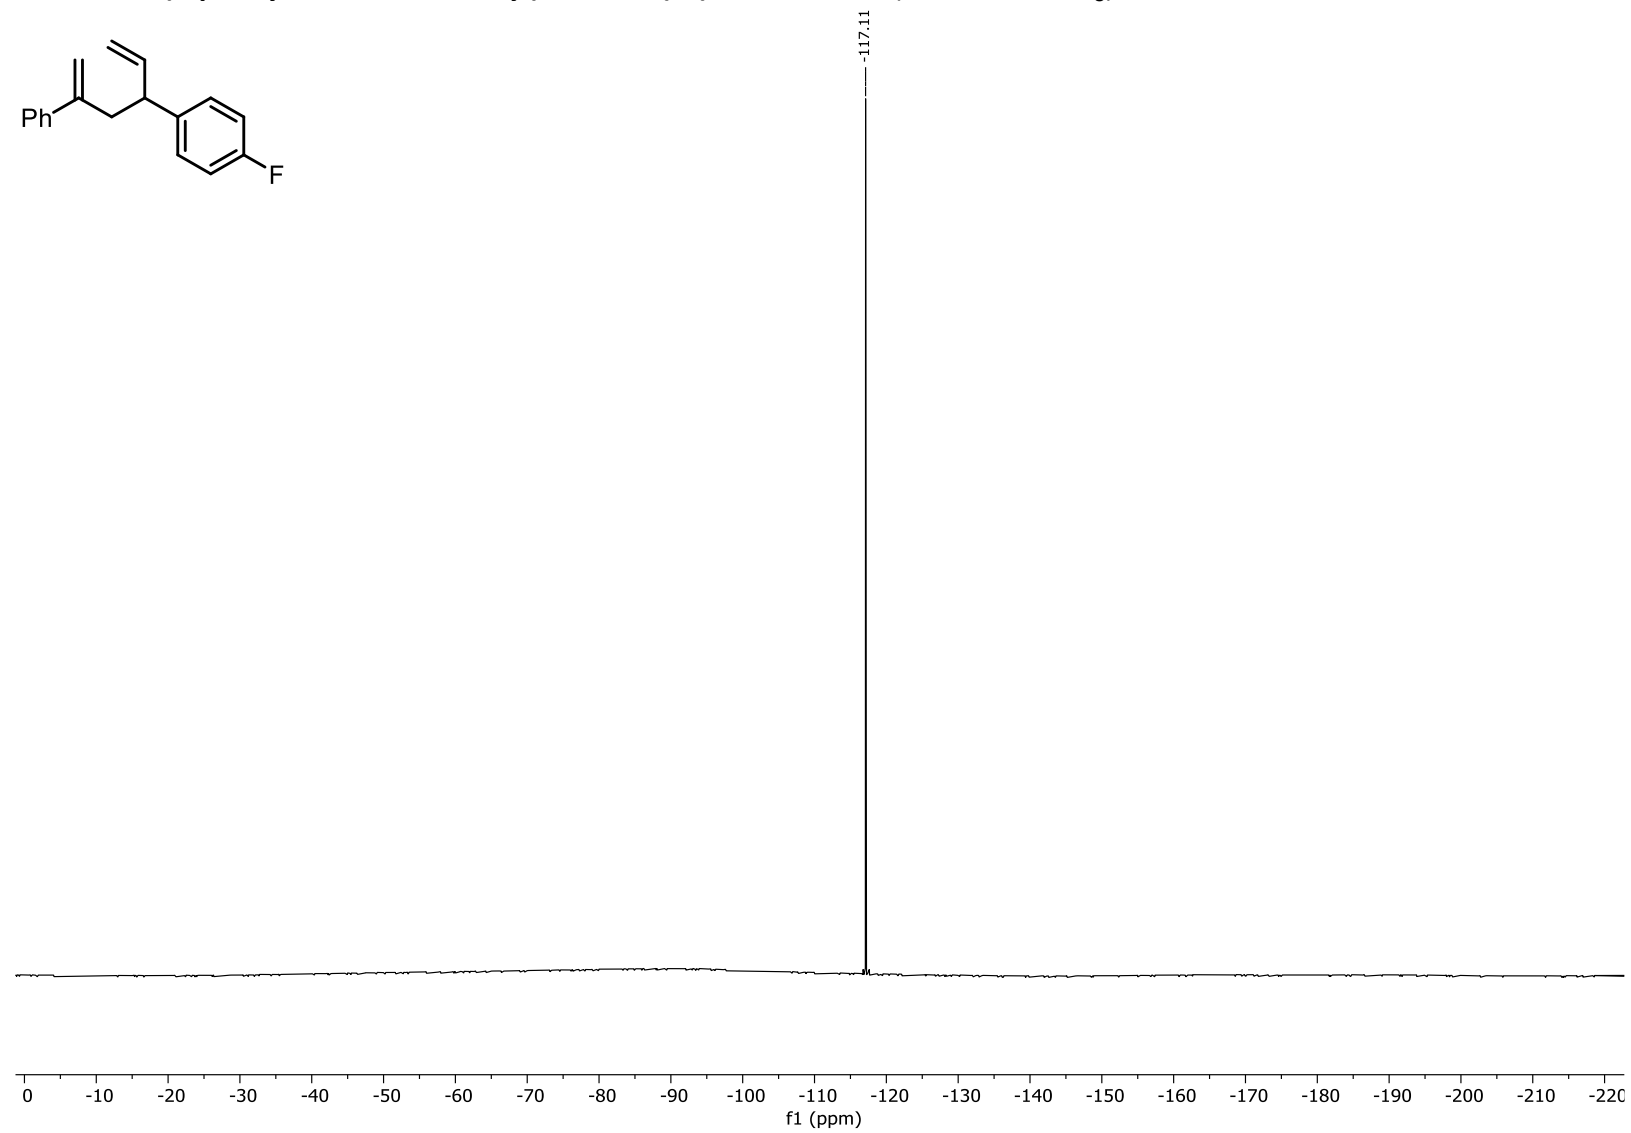

**(E)-1-phenyl-3-(pyridin-3-yl)prop-2-en-1-one (S21):**  $^1\text{H}$  NMR (300 MHz, DMSO- $d_6$ )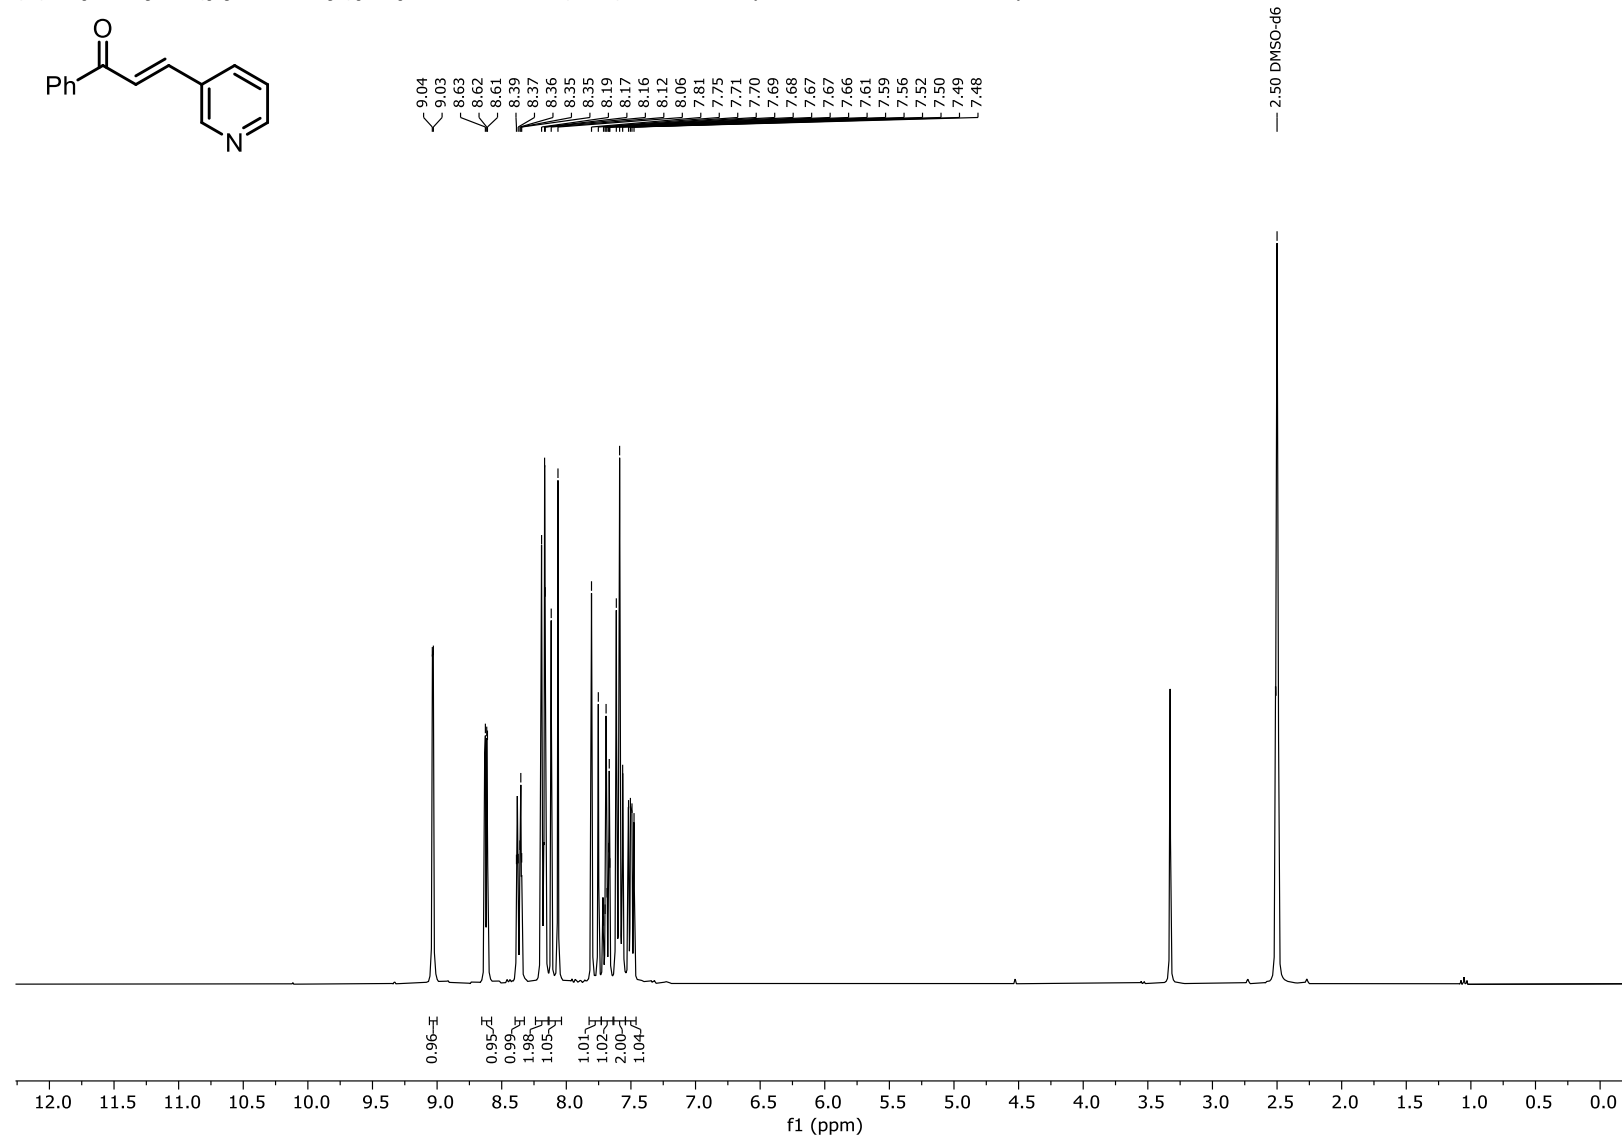

**(E)-1-phenyl-3-(pyridin-3-yl)prop-2-en-1-one (S21):**  $^{13}\text{C}\{^1\text{H}\}$  NMR (101 MHz, DMSO- $d_6$ )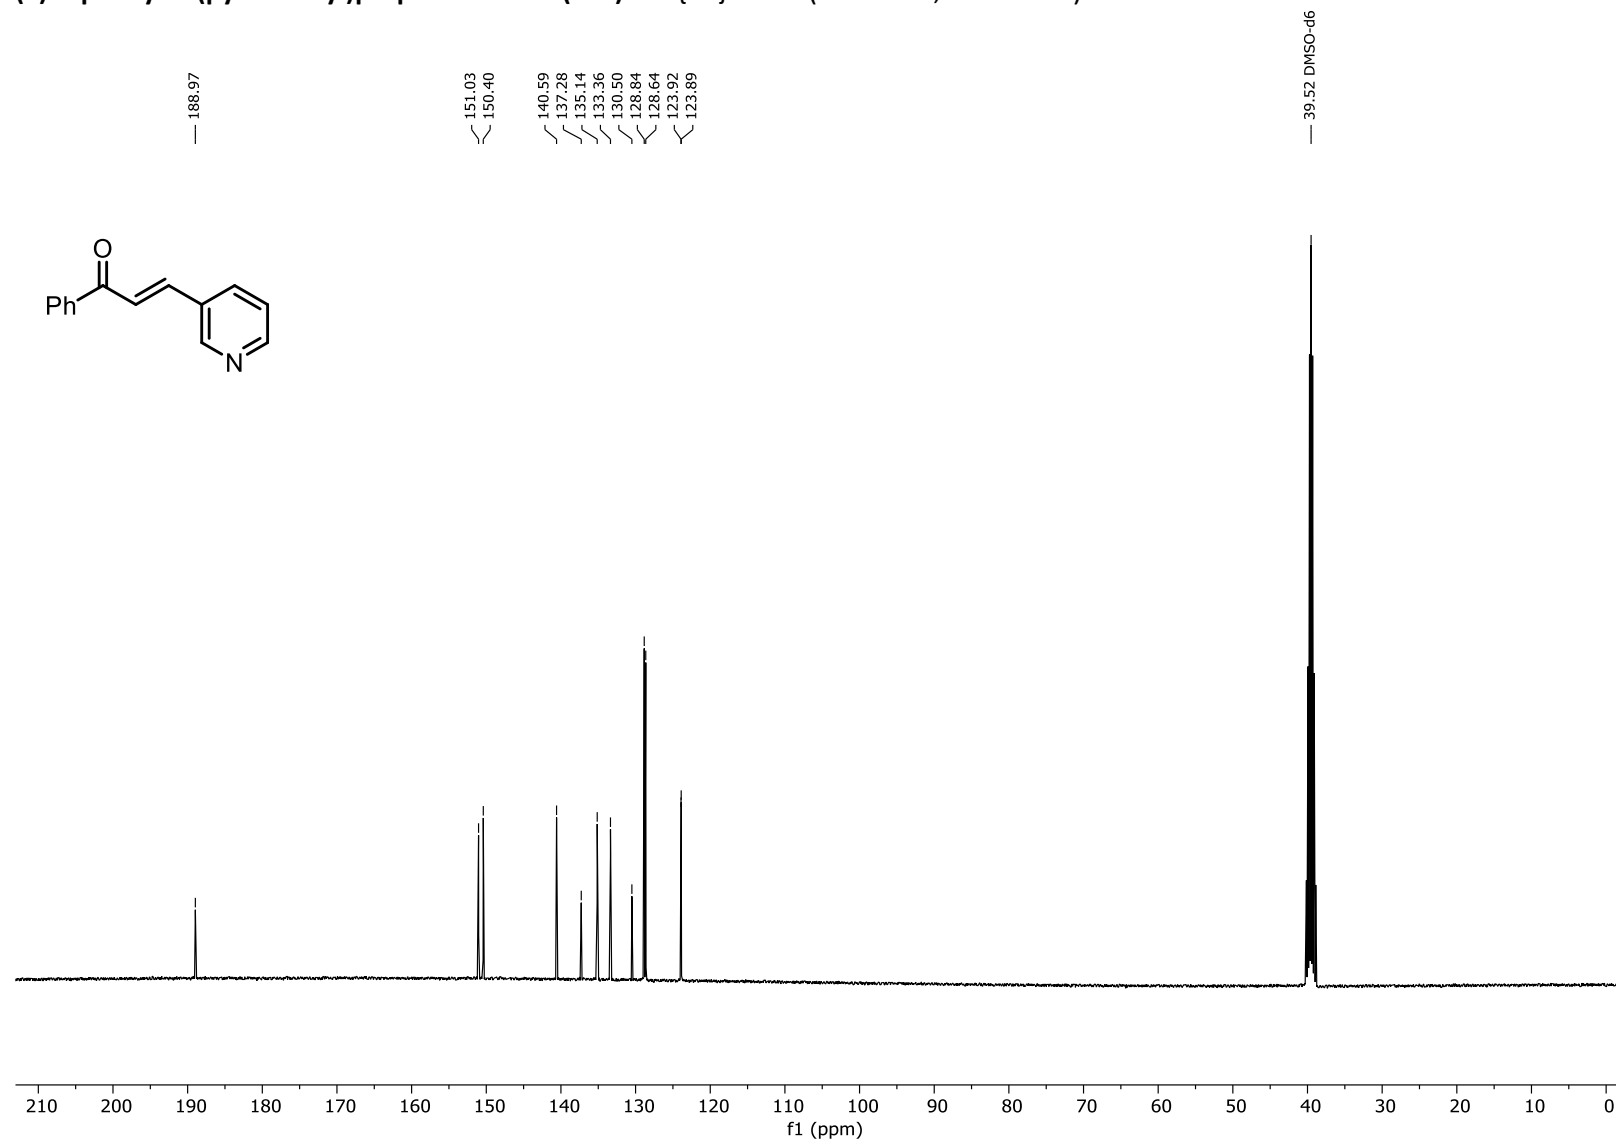

**1-Phenyl-3-(pyridin-3-yl)pent-4-en-1-one (S22):  $^1\text{H}$  NMR (300 MHz,  $\text{CDCl}_3$ )**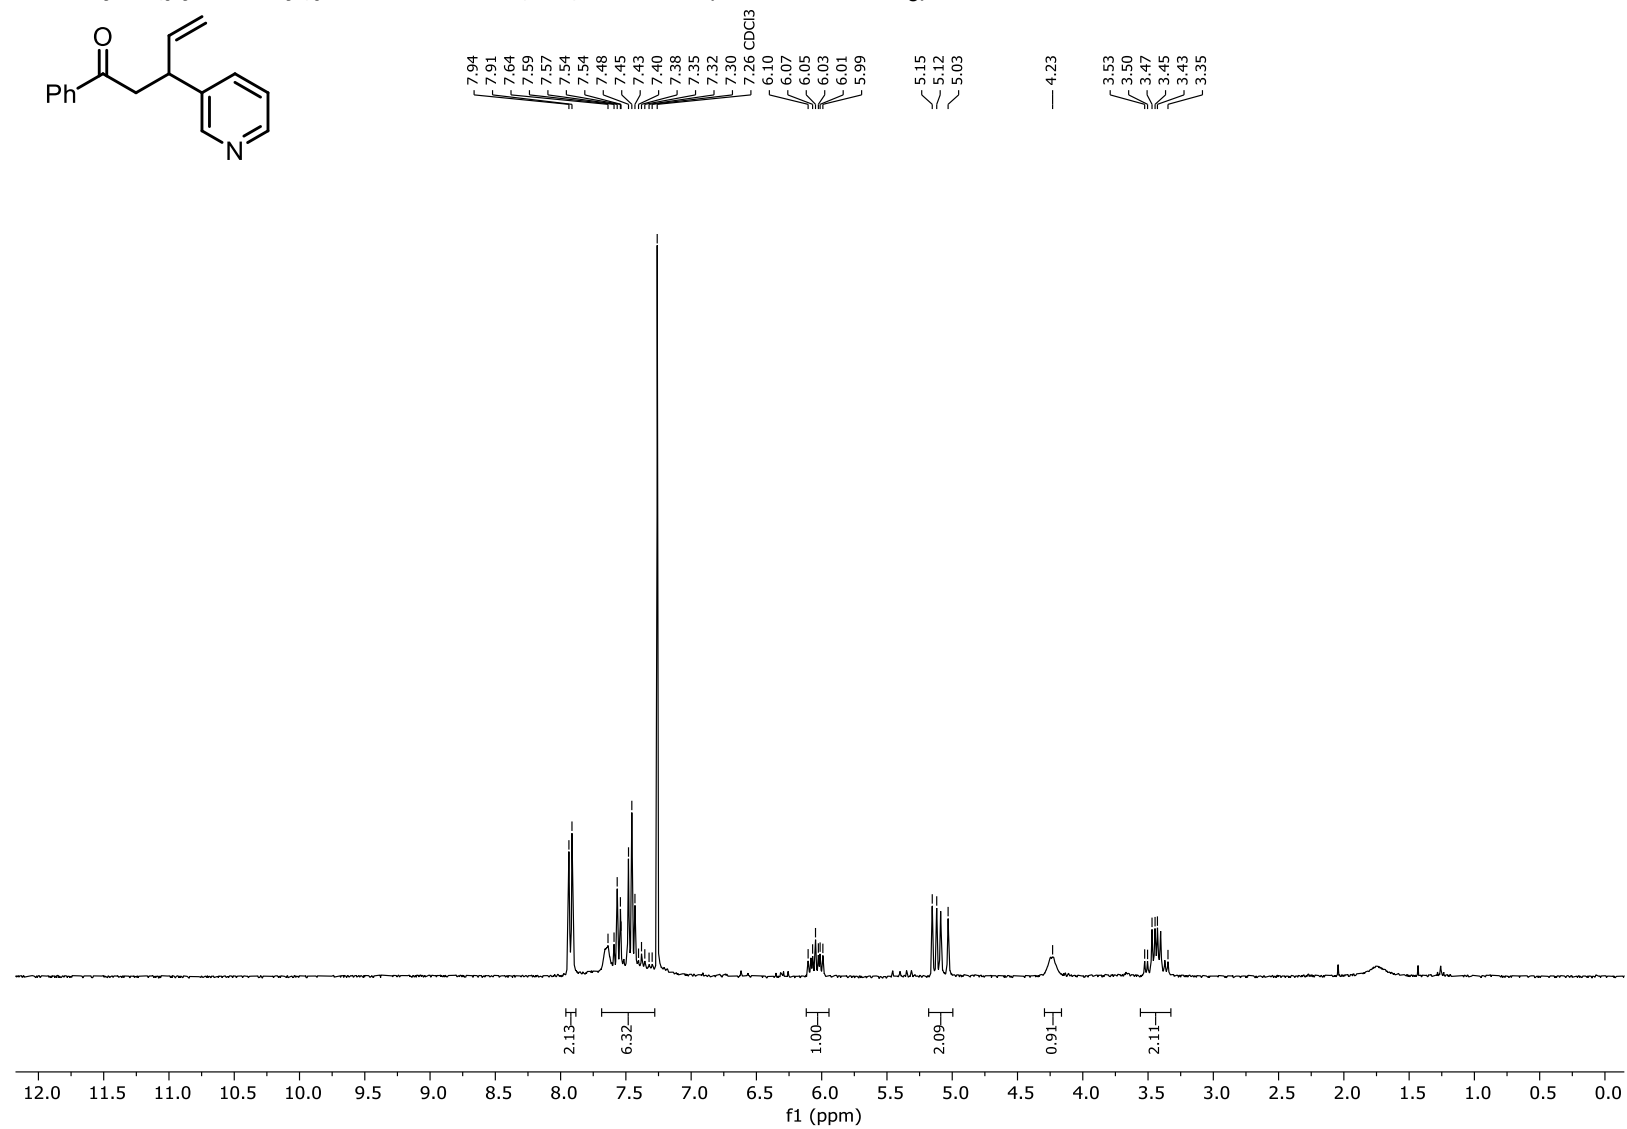

1-Phenyl-3-(pyridin-3-yl)pent-4-en-1-one (S22):  $^{13}\text{C}\{^1\text{H}\}$  NMR (101 MHz,  $\text{CDCl}_3$ )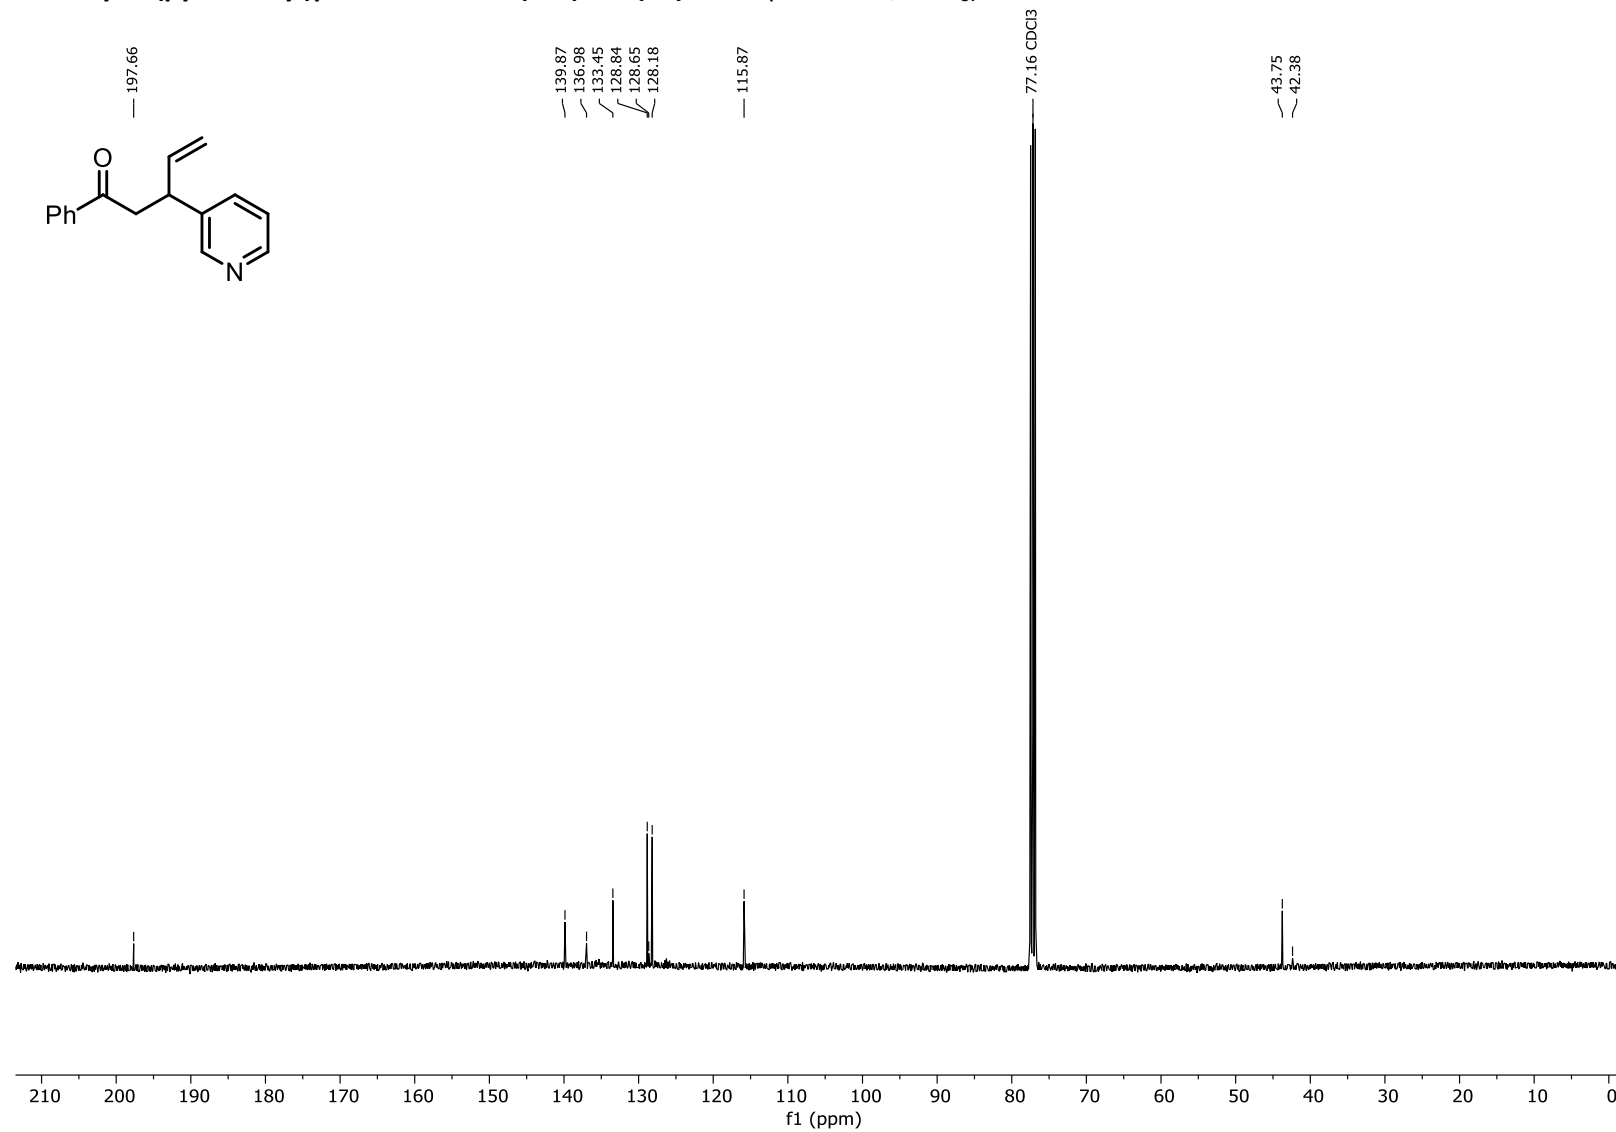

3-(5-Phenylhexa-1,5-dien-3-yl)pyridine (1t):  $^1\text{H}$  NMR (300 MHz,  $\text{CDCl}_3$ )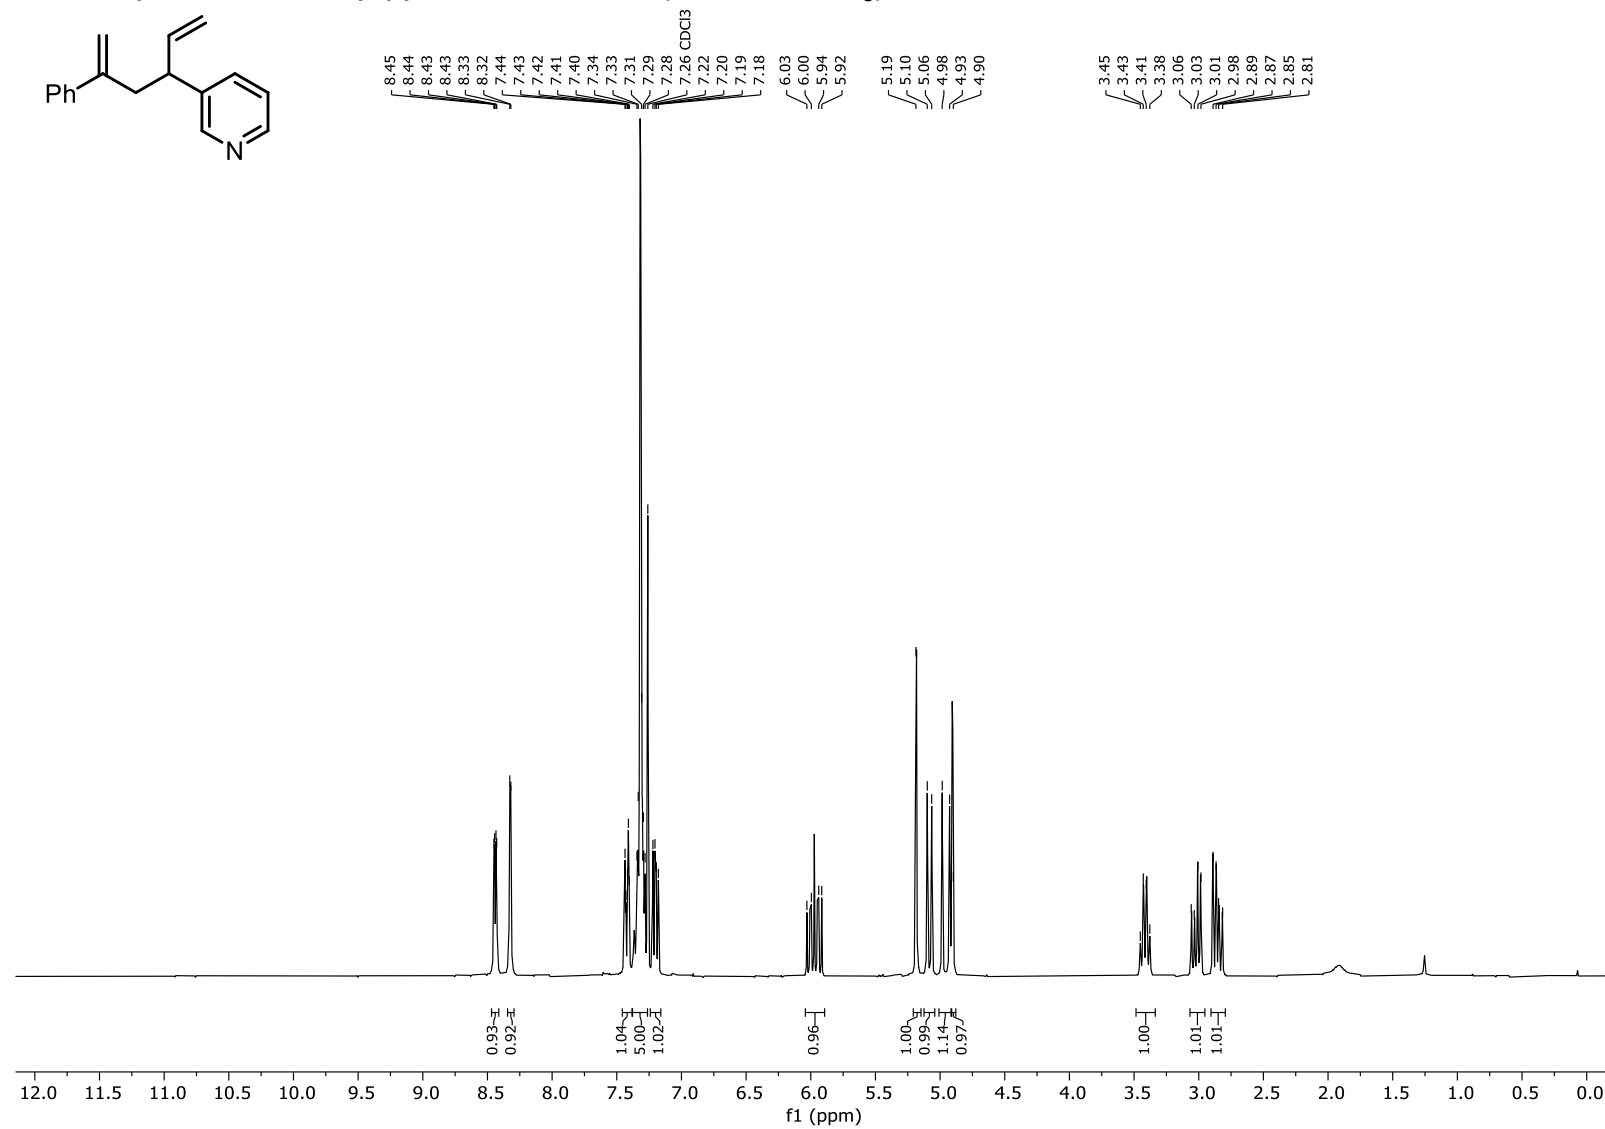

**3-(5-Phenylhexa-1,5-dien-3-yl)pyridine (1t):**  $^{13}\text{C}\{^1\text{H}\}$  NMR (101 MHz,  $\text{CDCl}_3$ )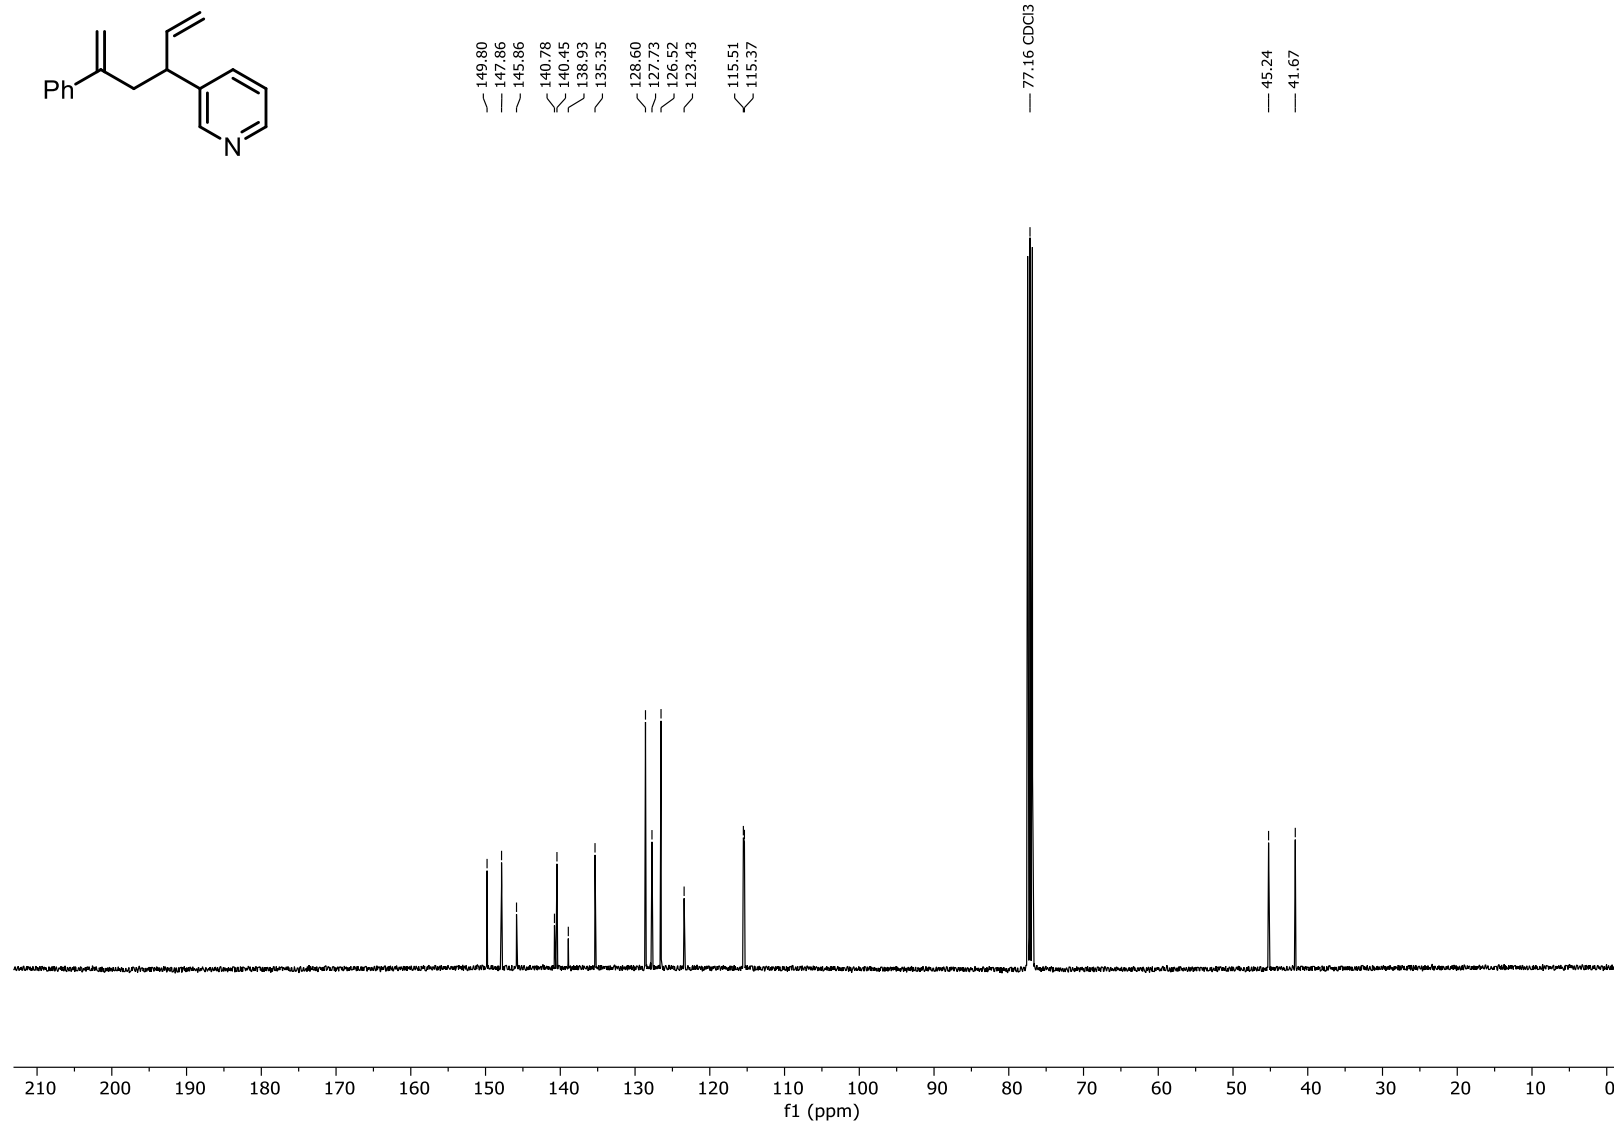



Ethyl 3-phenylhepta-2,6-dienoate (1u):  $^1\text{H}$  NMR (300 MHz,  $\text{CDCl}_3$ )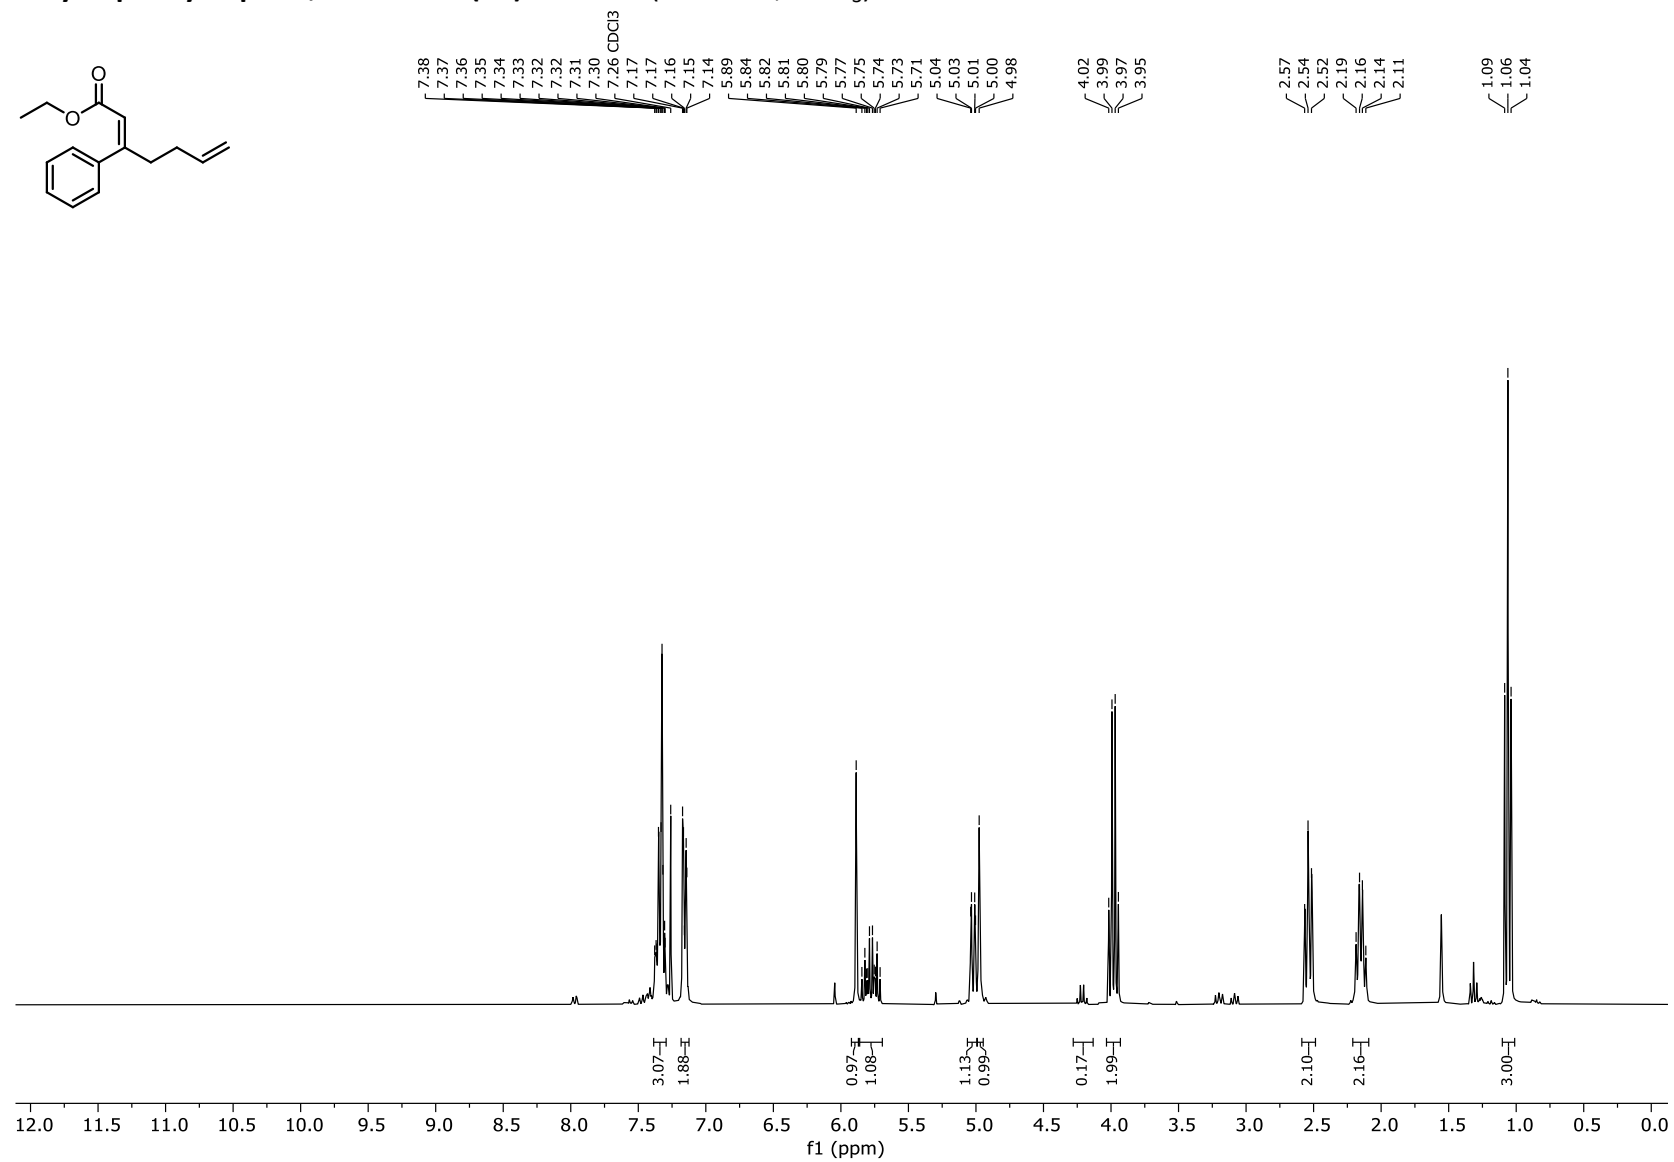

Ethyl 3-phenylhepta-2,6-dienoate (**1u**):  $^{13}\text{C}\{^1\text{H}\}$  NMR (101 MHz,  $\text{CDCl}_3$ )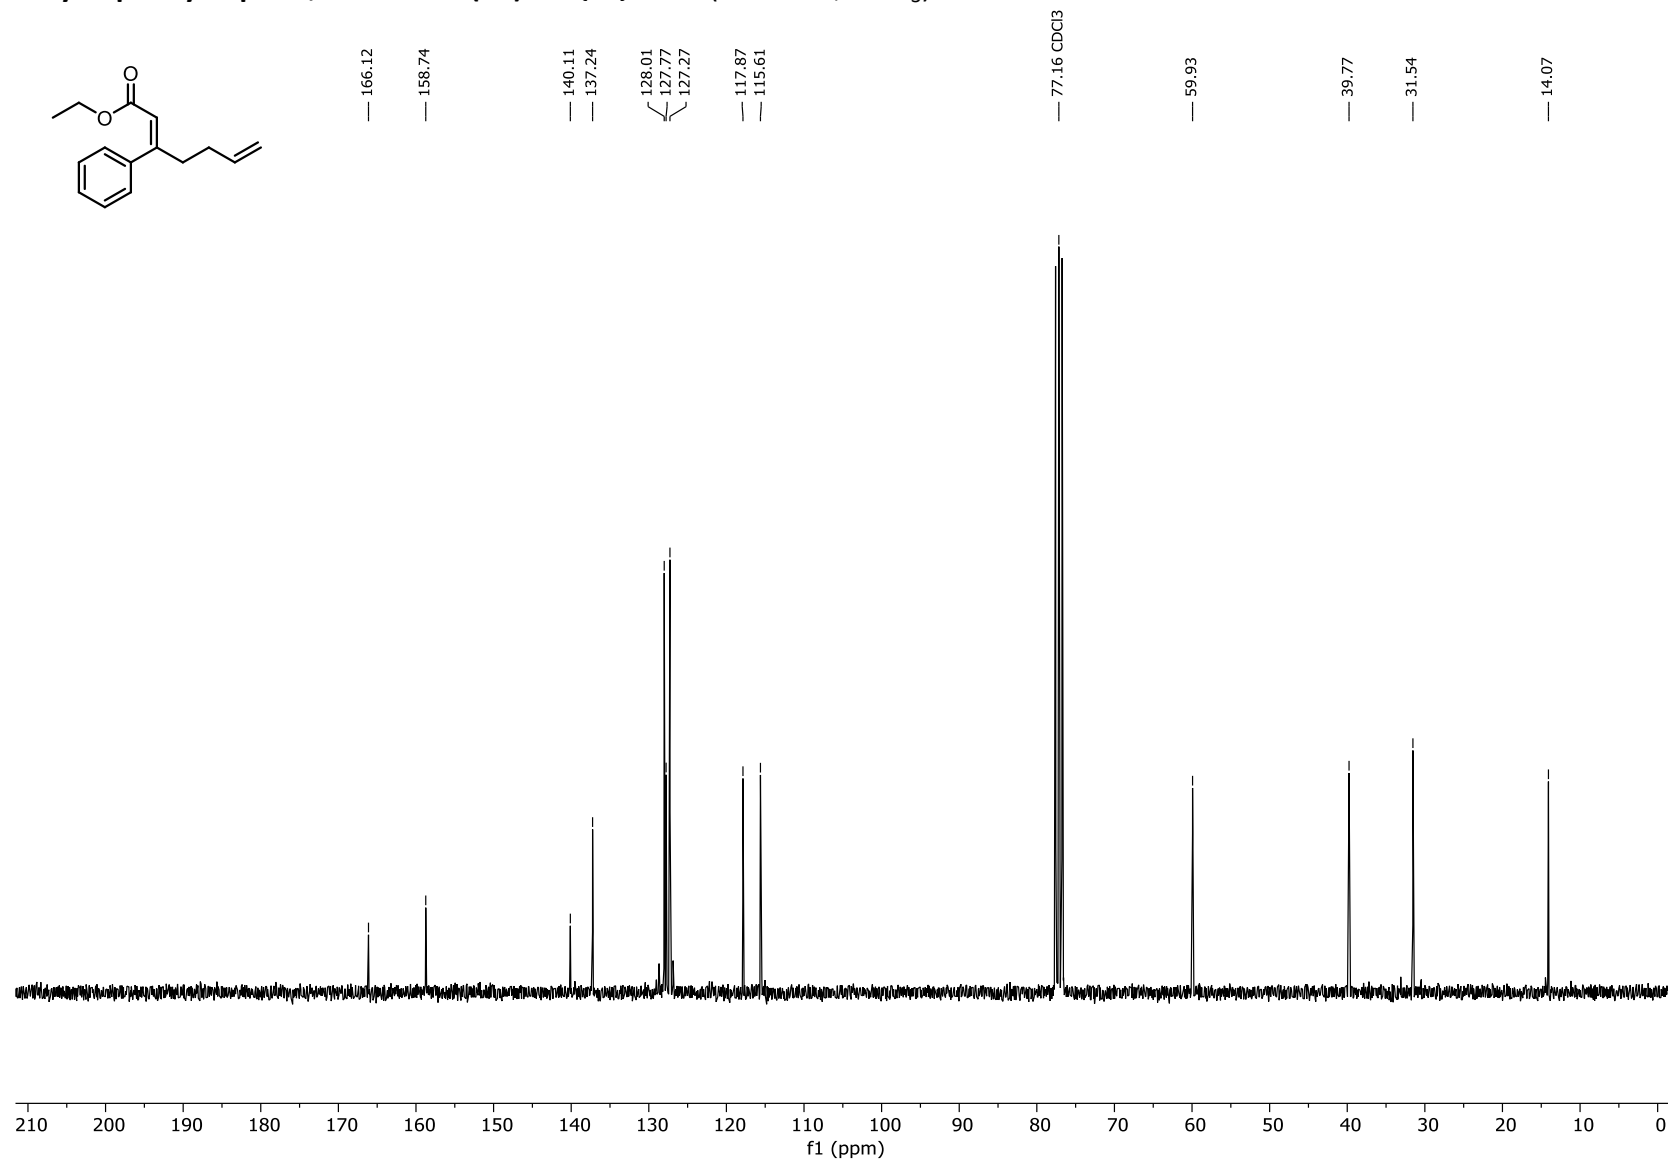

Ethyl (*E*)-3-phenylhepta-2,6-dienoate (**1u**):  $^1\text{H}$  NOESY (400 MHz,  $\text{CDCl}_3$ )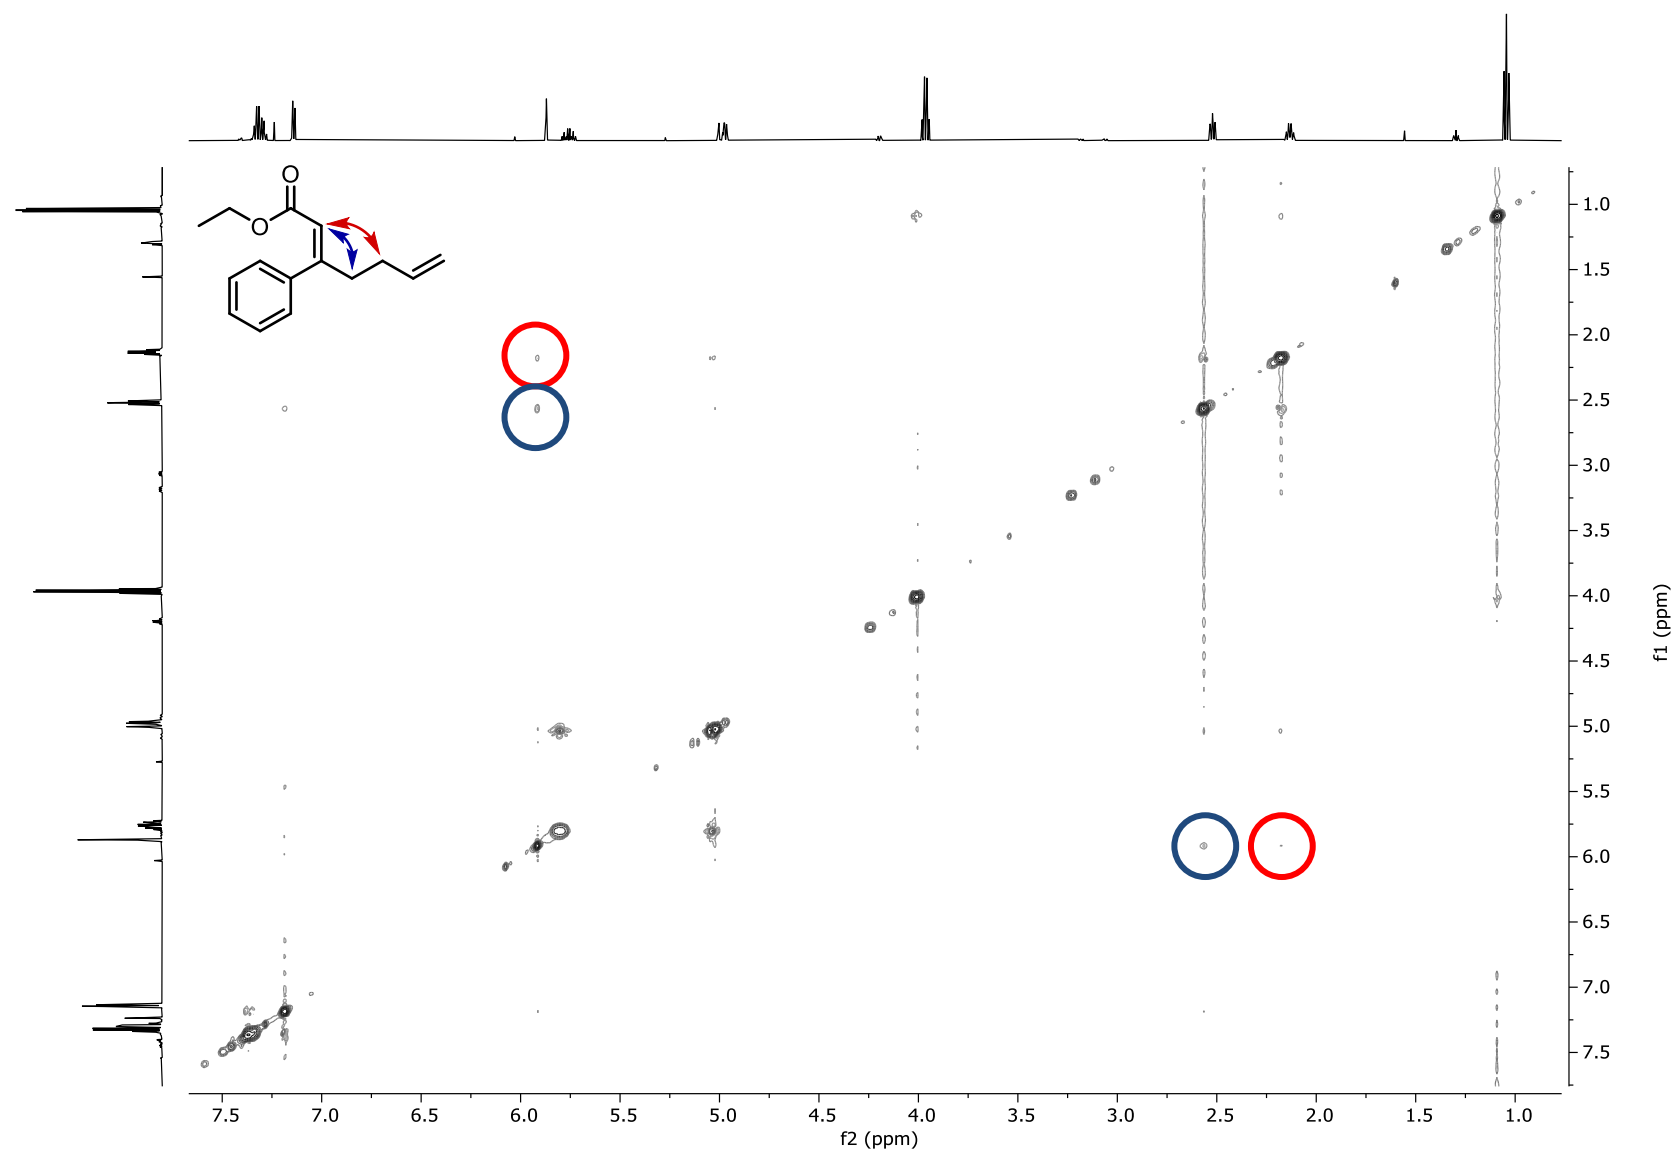

Ethyl 4-methyl-2-(1-phenylvinyl)pent-4-enoate (1v):  $^1\text{H}$  NMR (400 MHz,  $\text{CDCl}_3$ )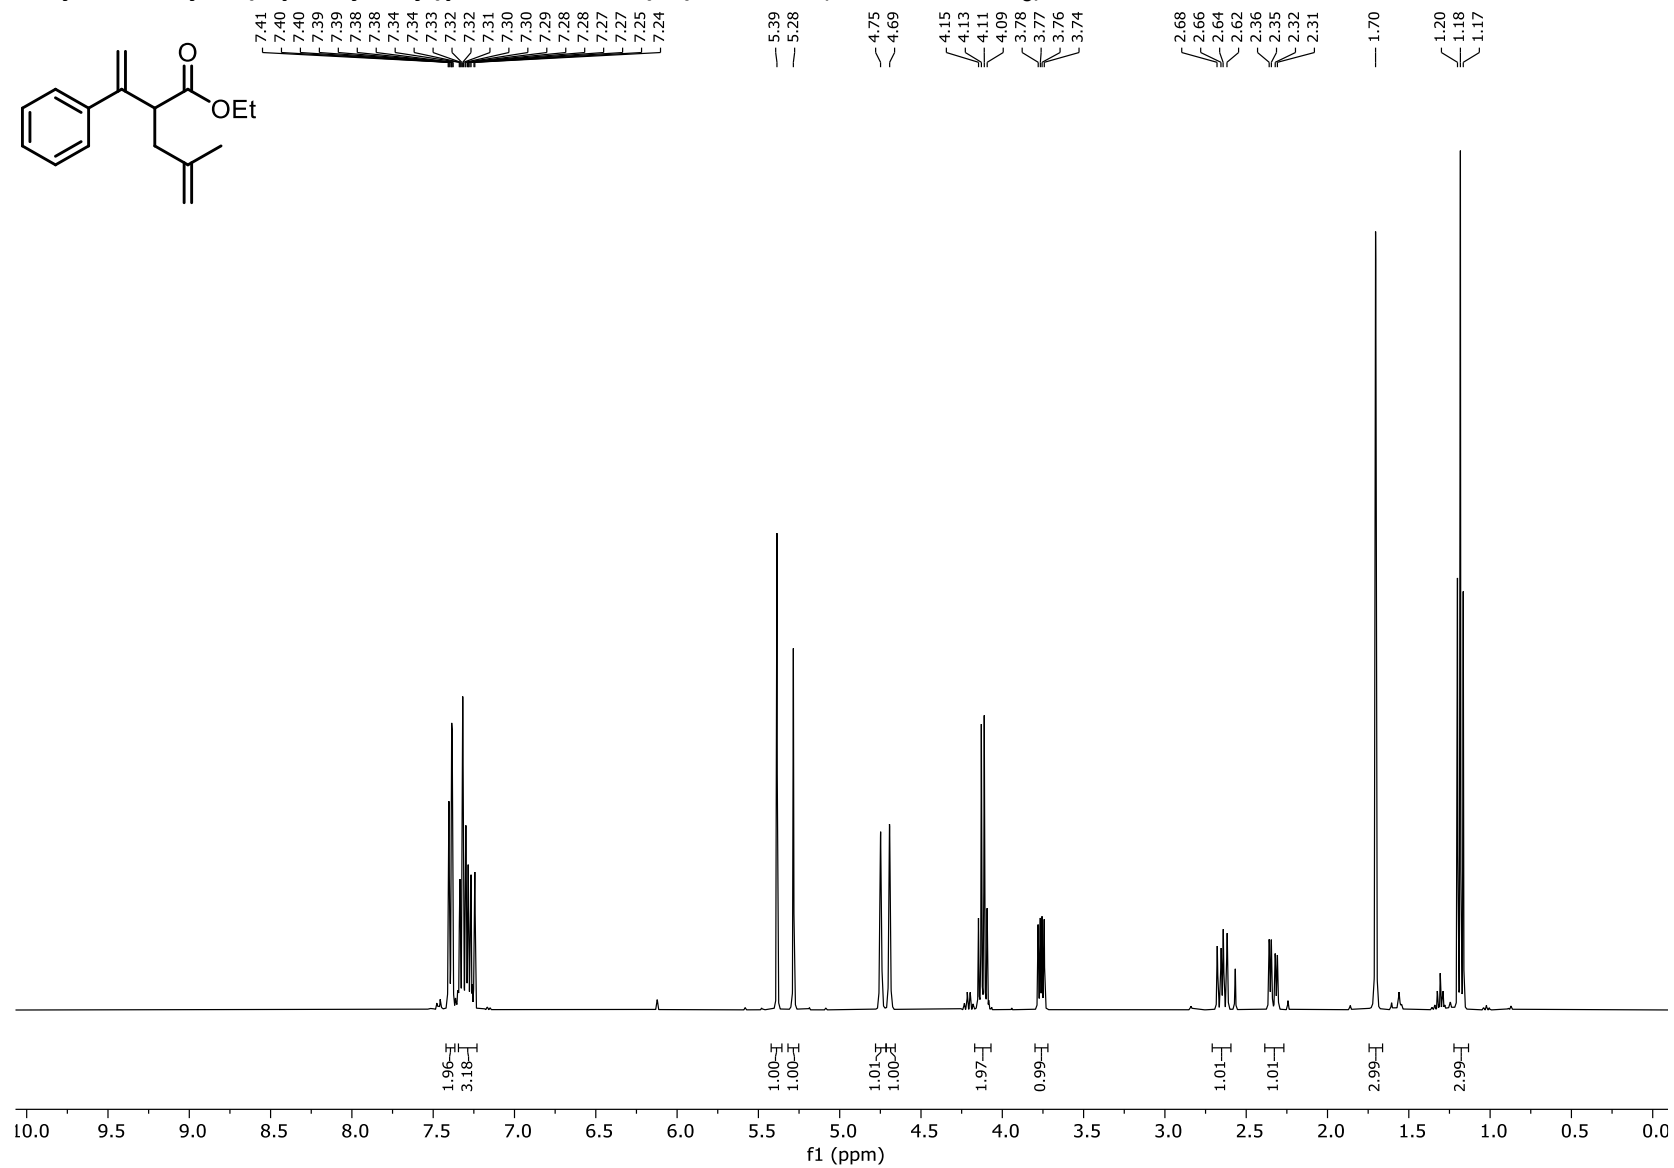

Ethyl 4-methyl-2-(1-phenylvinyl)pent-4-enoate (**1v**):  $^{13}\text{C}$  NMR (101 MHz,  $\text{CDCl}_3$ )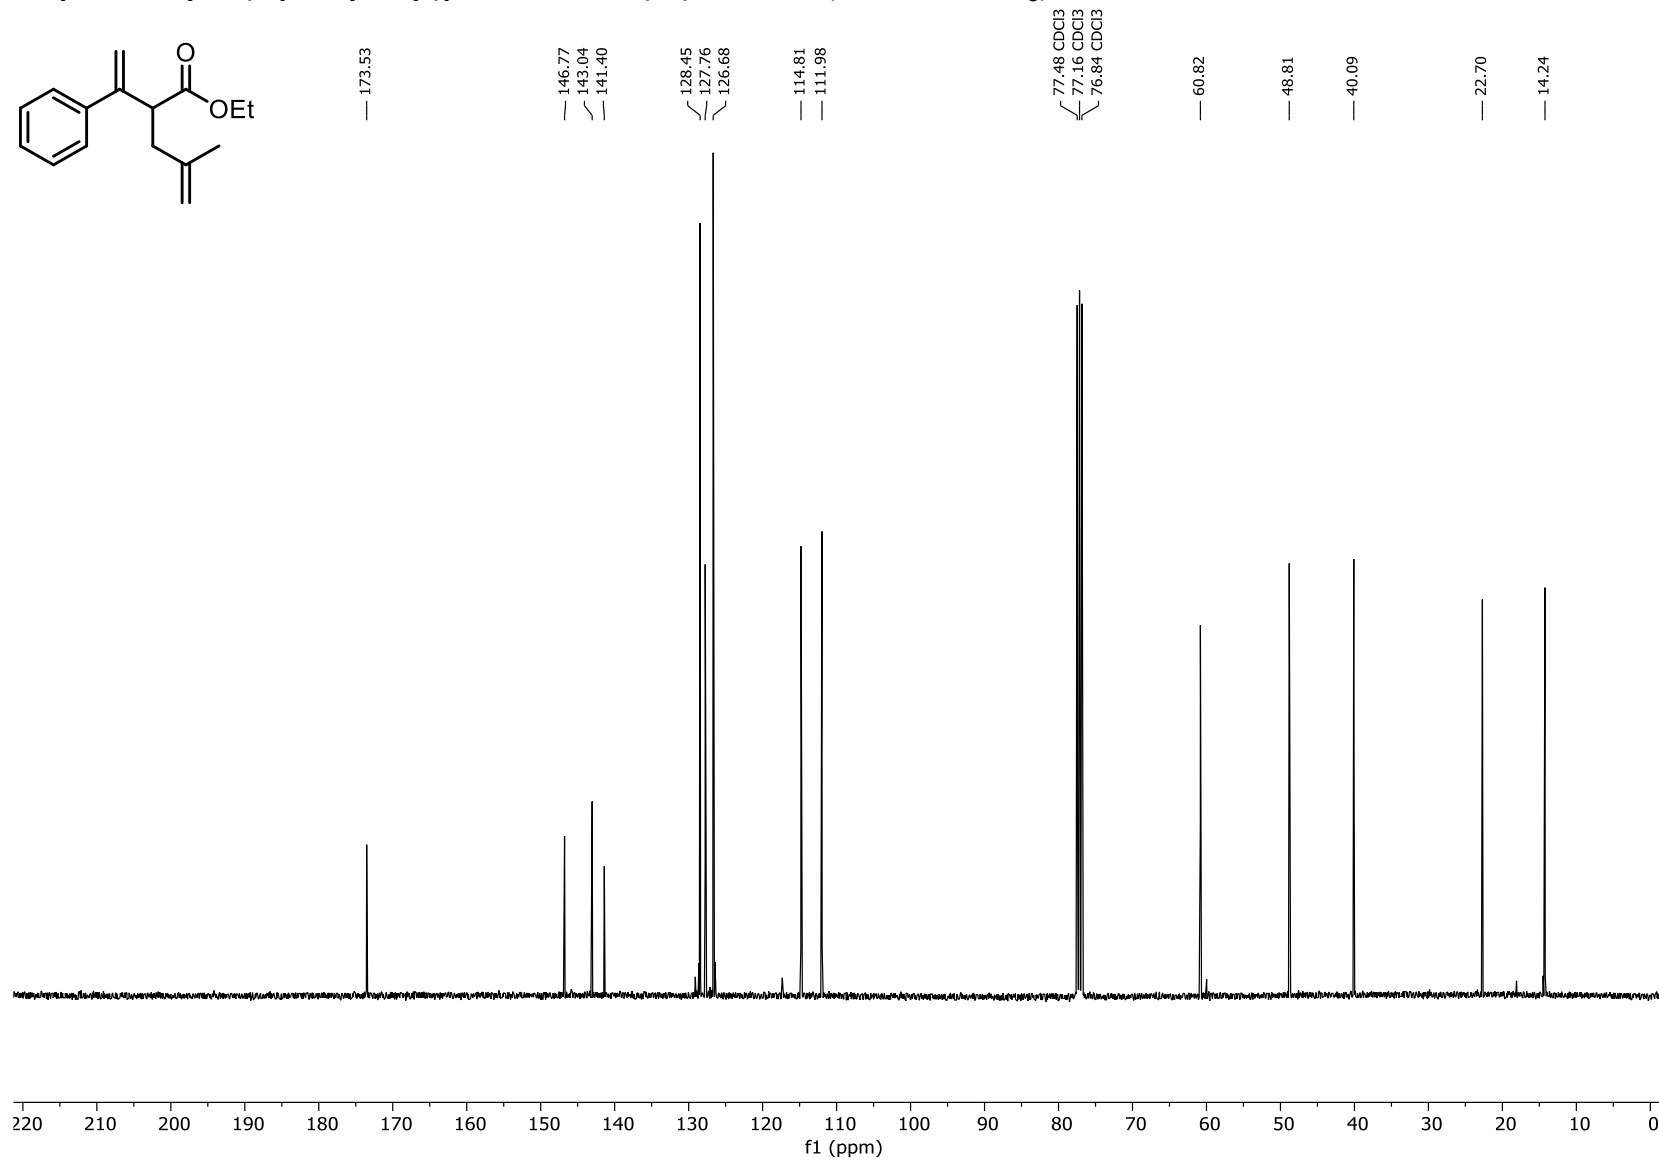

Methyl 4-hydroxy-2-methylene-5-phenylhex-5-enoate (1w):  $^1\text{H}$  NMR (300 MHz,  $\text{CDCl}_3$ )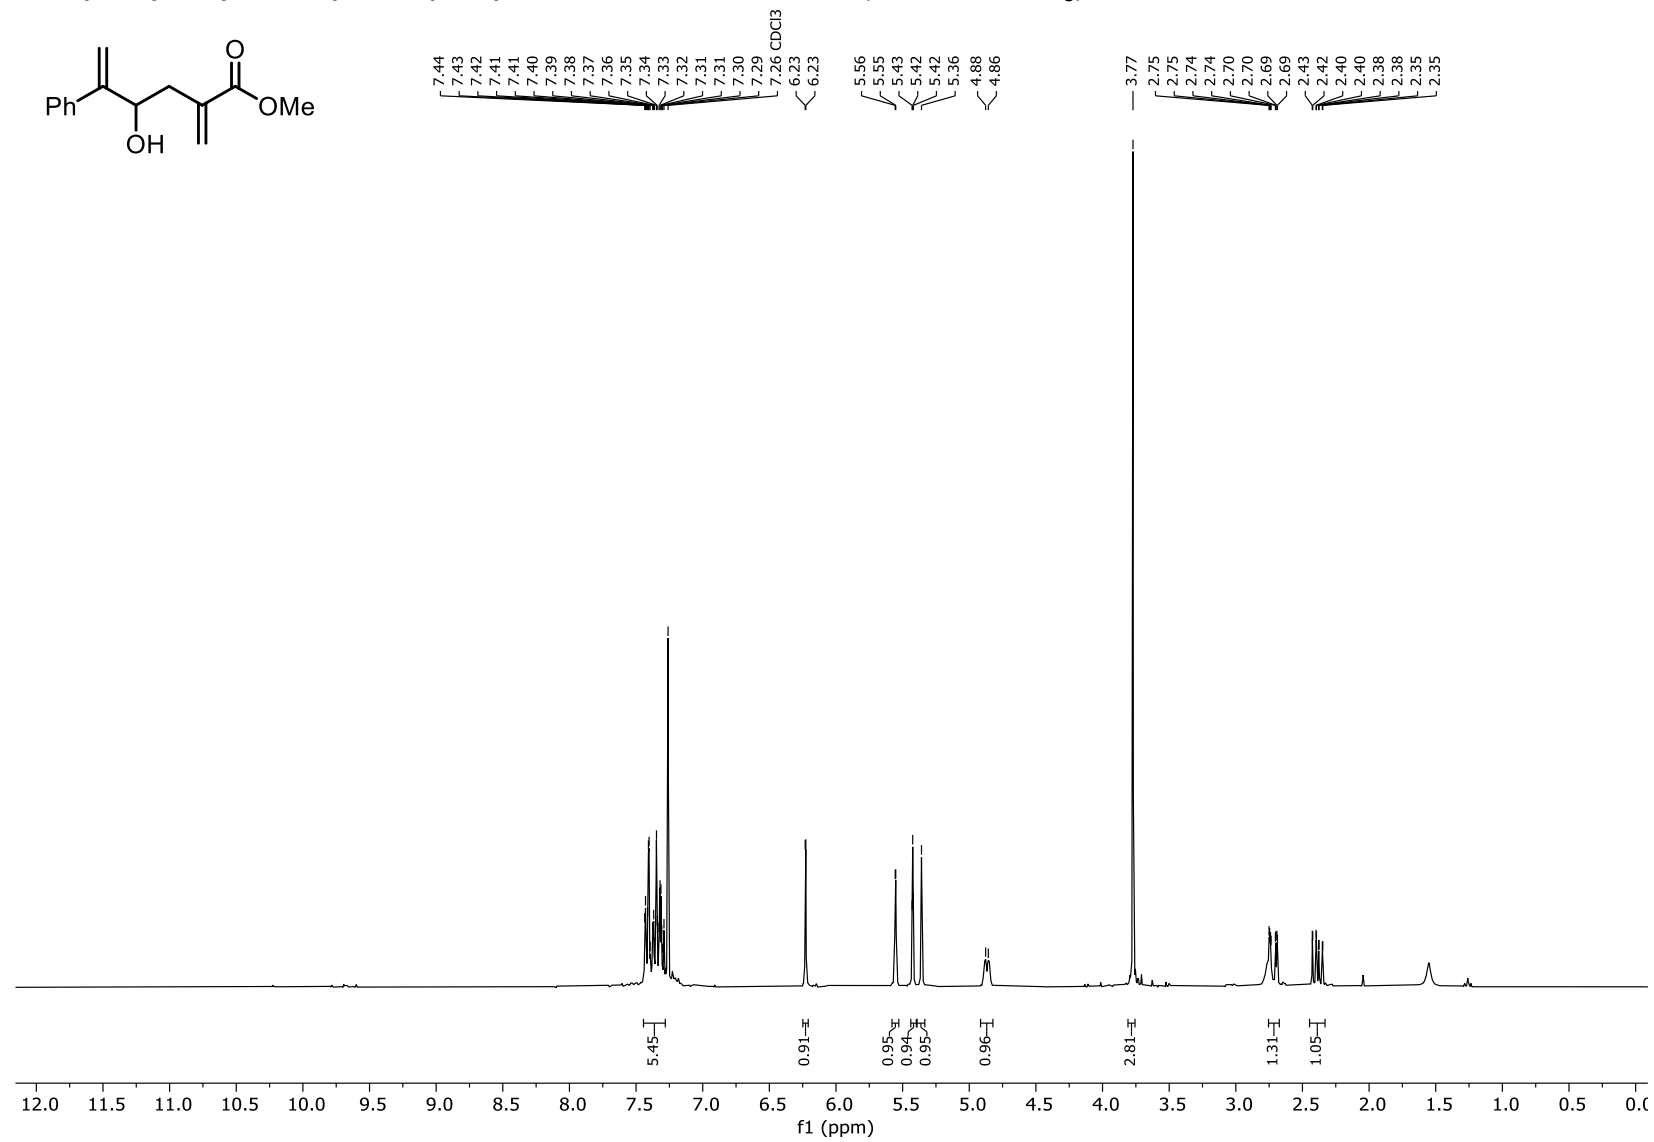

Methyl 4-hydroxy-2-methylene-5-phenylhex-5-enoate (**1w**):  $^{13}\text{C}\{^1\text{H}\}$  NMR (101 MHz,  $\text{CDCl}_3$ )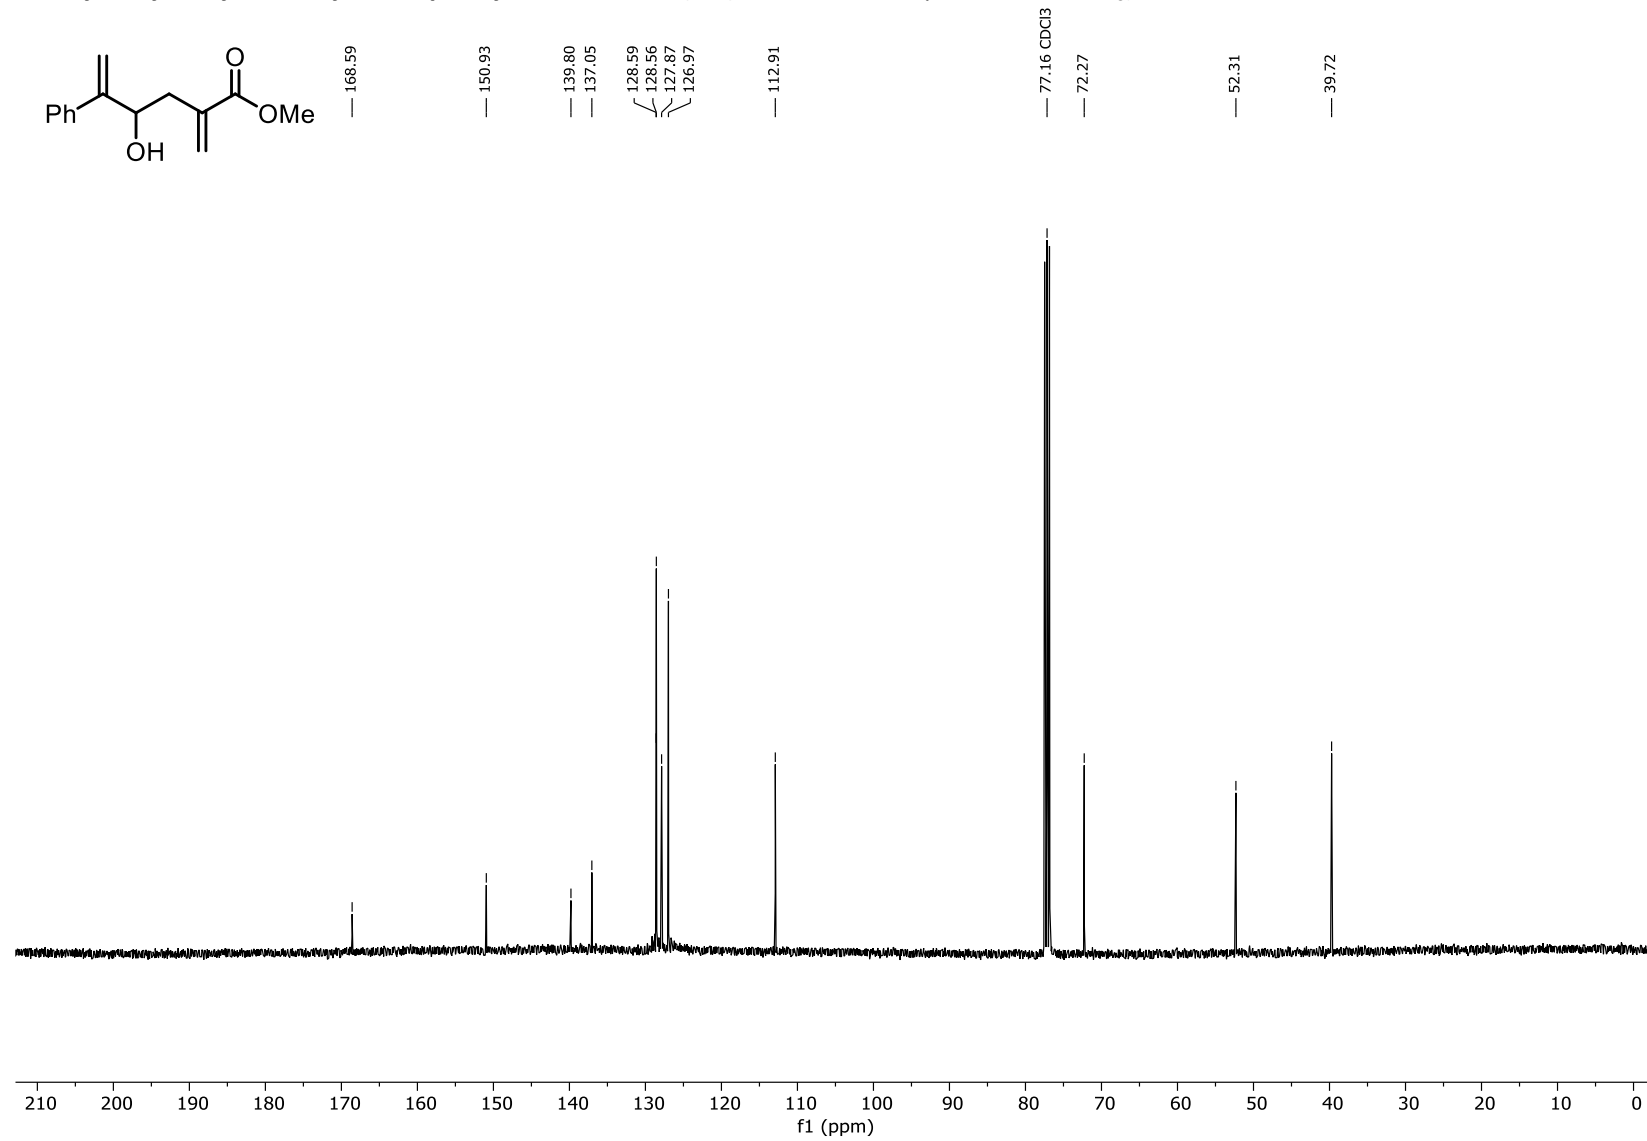

4-Methyl-1-phenyl-3-(pyridin-3-yl)pent-4-en-1-one (S23):  $^1\text{H}$  NMR (300 MHz,  $\text{CDCl}_3$ )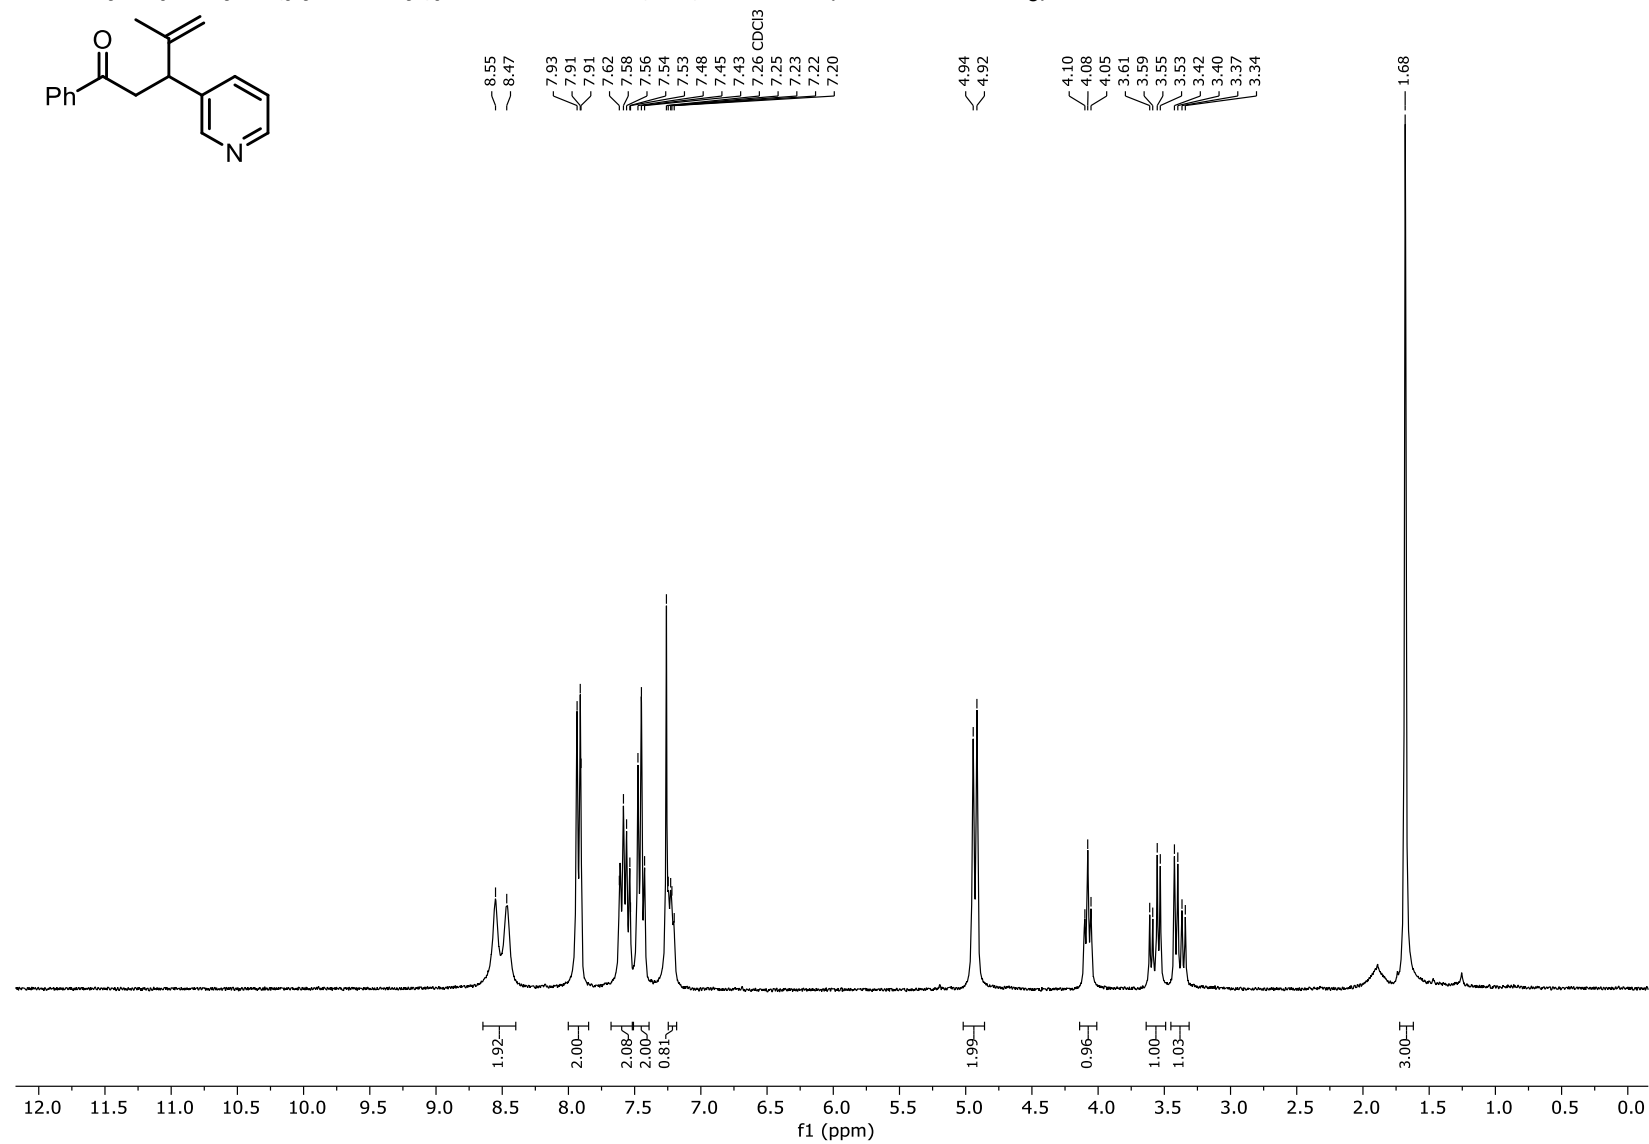



4-Methyl-1-phenyl-3-(pyridin-3-yl)pent-4-en-1-one (S23):  $^{13}\text{C}\{^1\text{H}\}$  NMR (101 MHz,  $\text{CDCl}_3$ )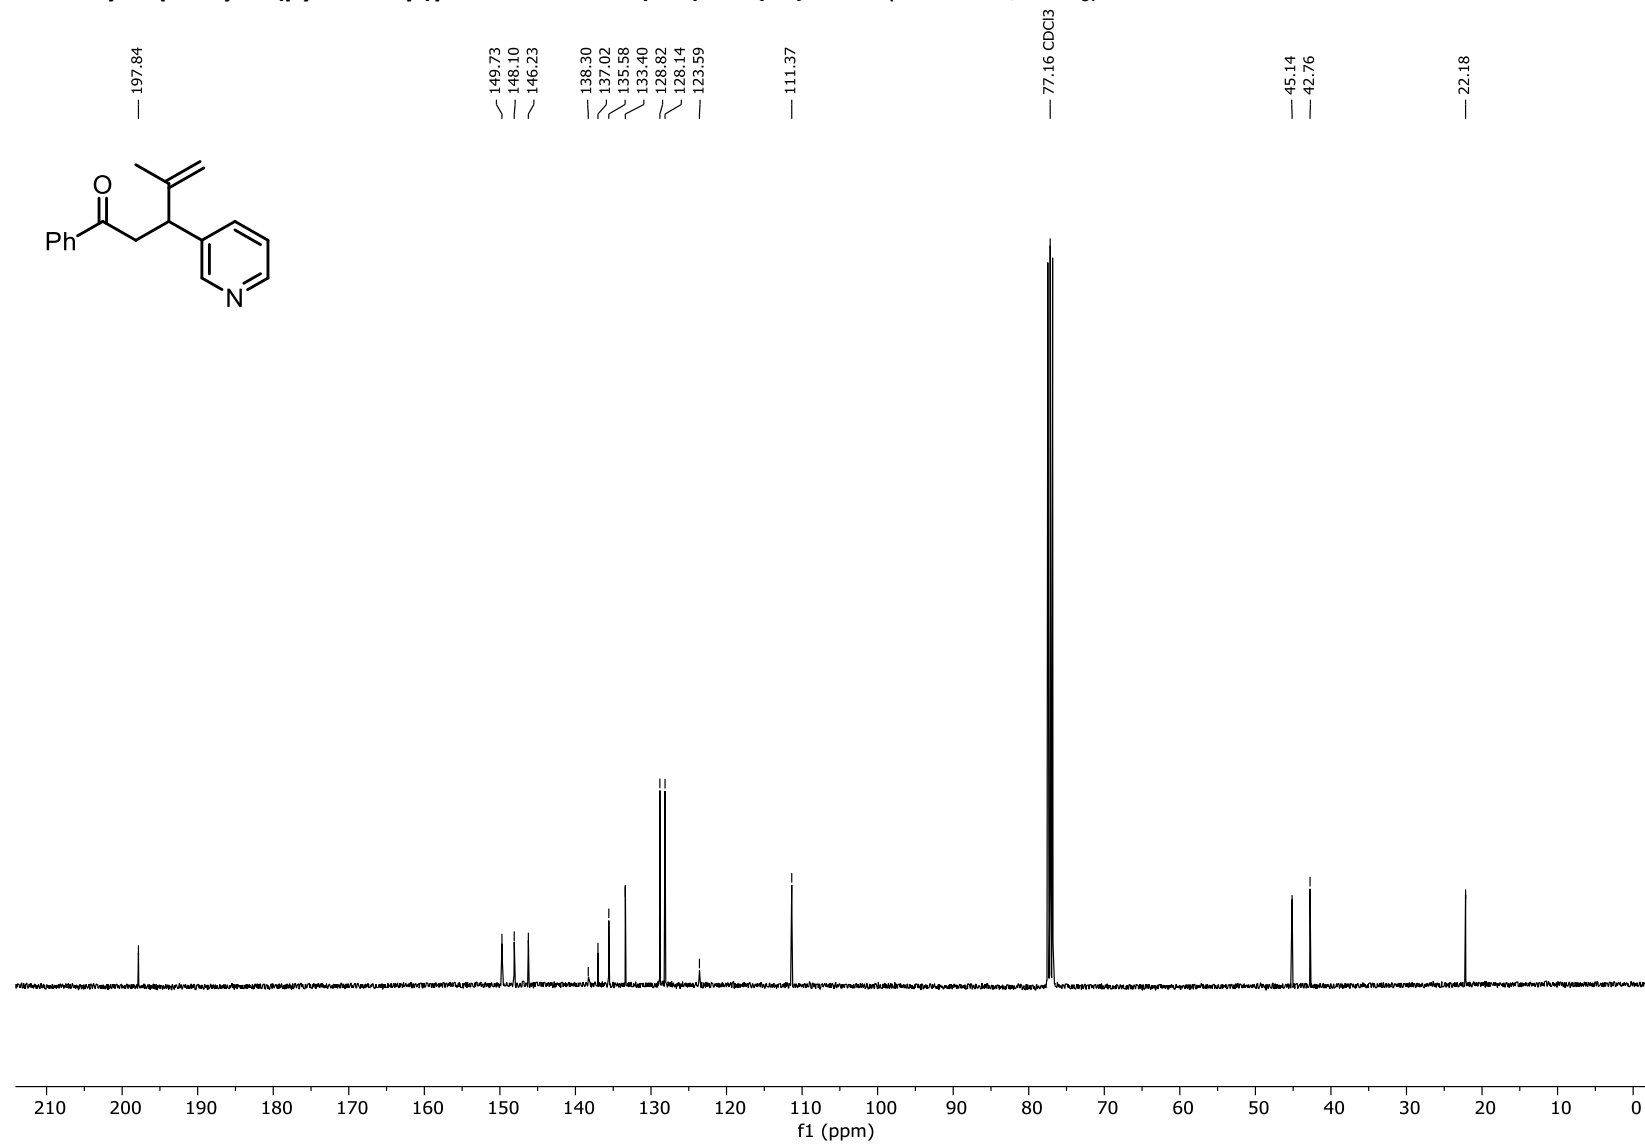

3-(2-Methyl-5-phenylhexa-1,5-dien-3-yl)pyridine (1x):  $^1\text{H}$  NMR (300 MHz,  $\text{CDCl}_3$ )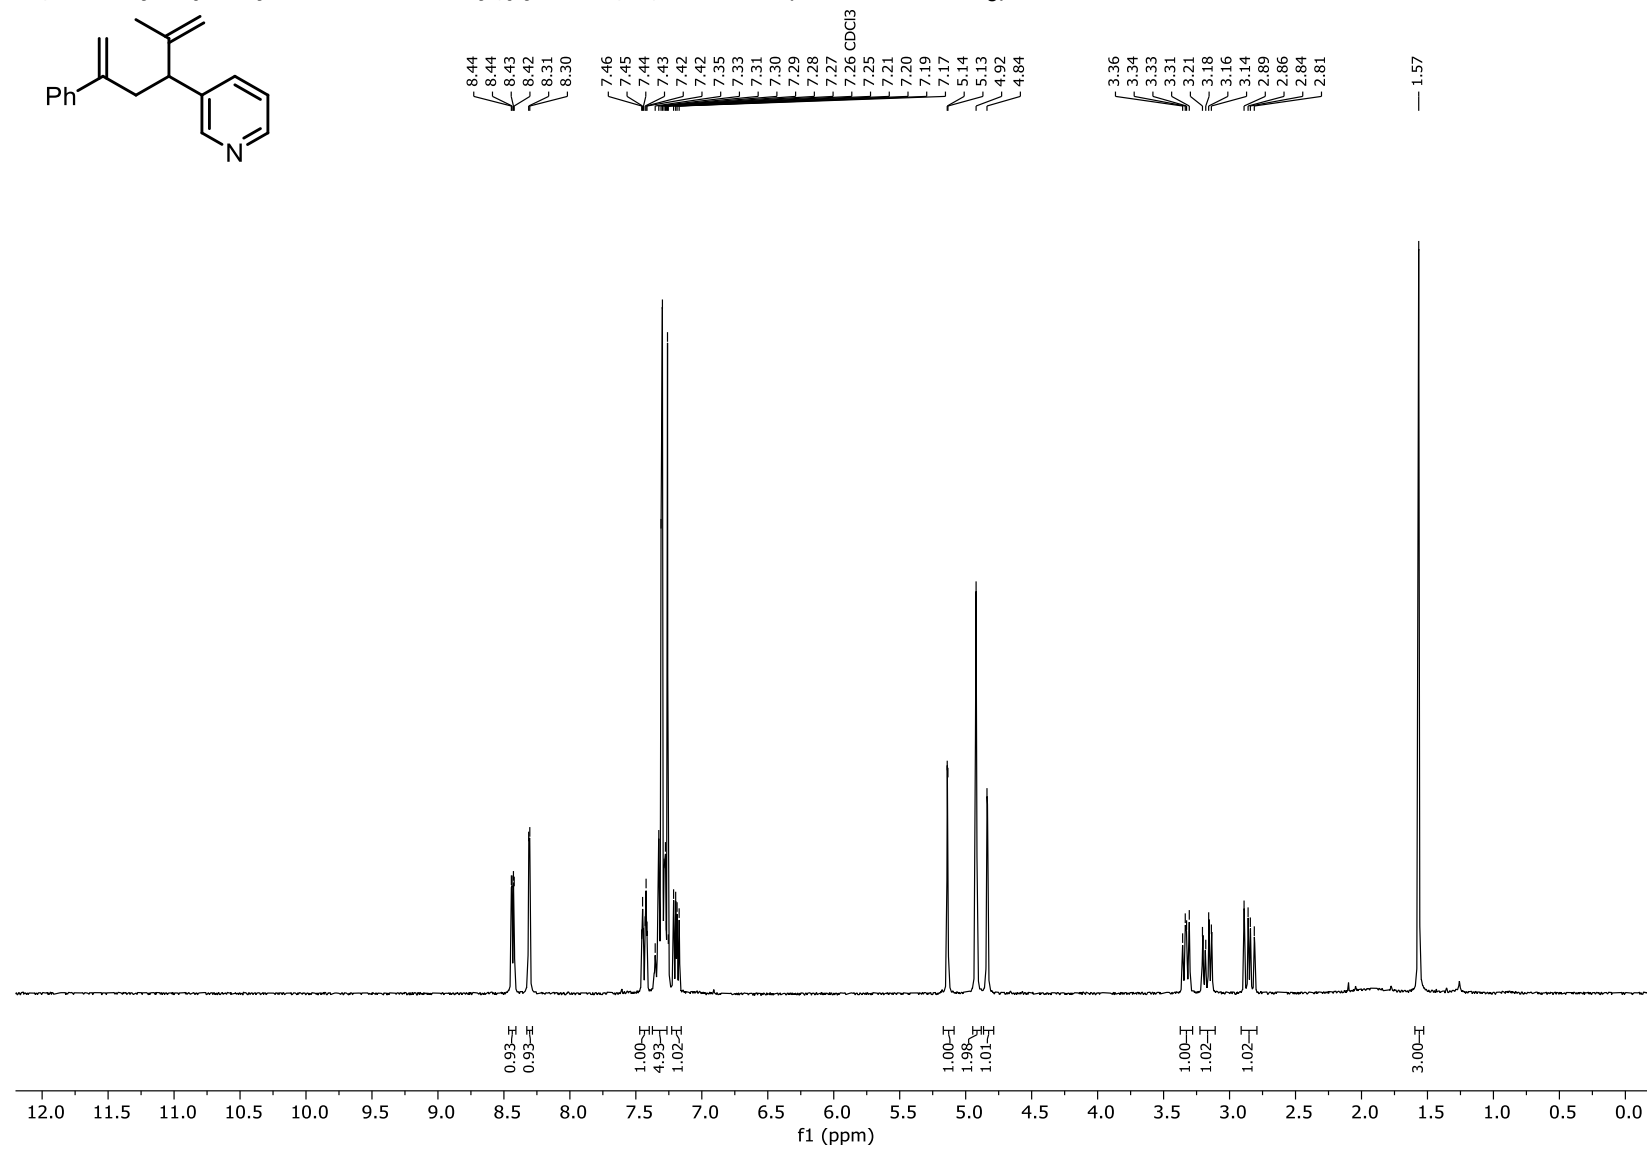

**3-(2-Methyl-5-phenylhexa-1,5-dien-3-yl)pyridine (1x):**  $^{13}\text{C}\{^1\text{H}\}$  NMR (101 MHz,  $\text{CDCl}_3$ )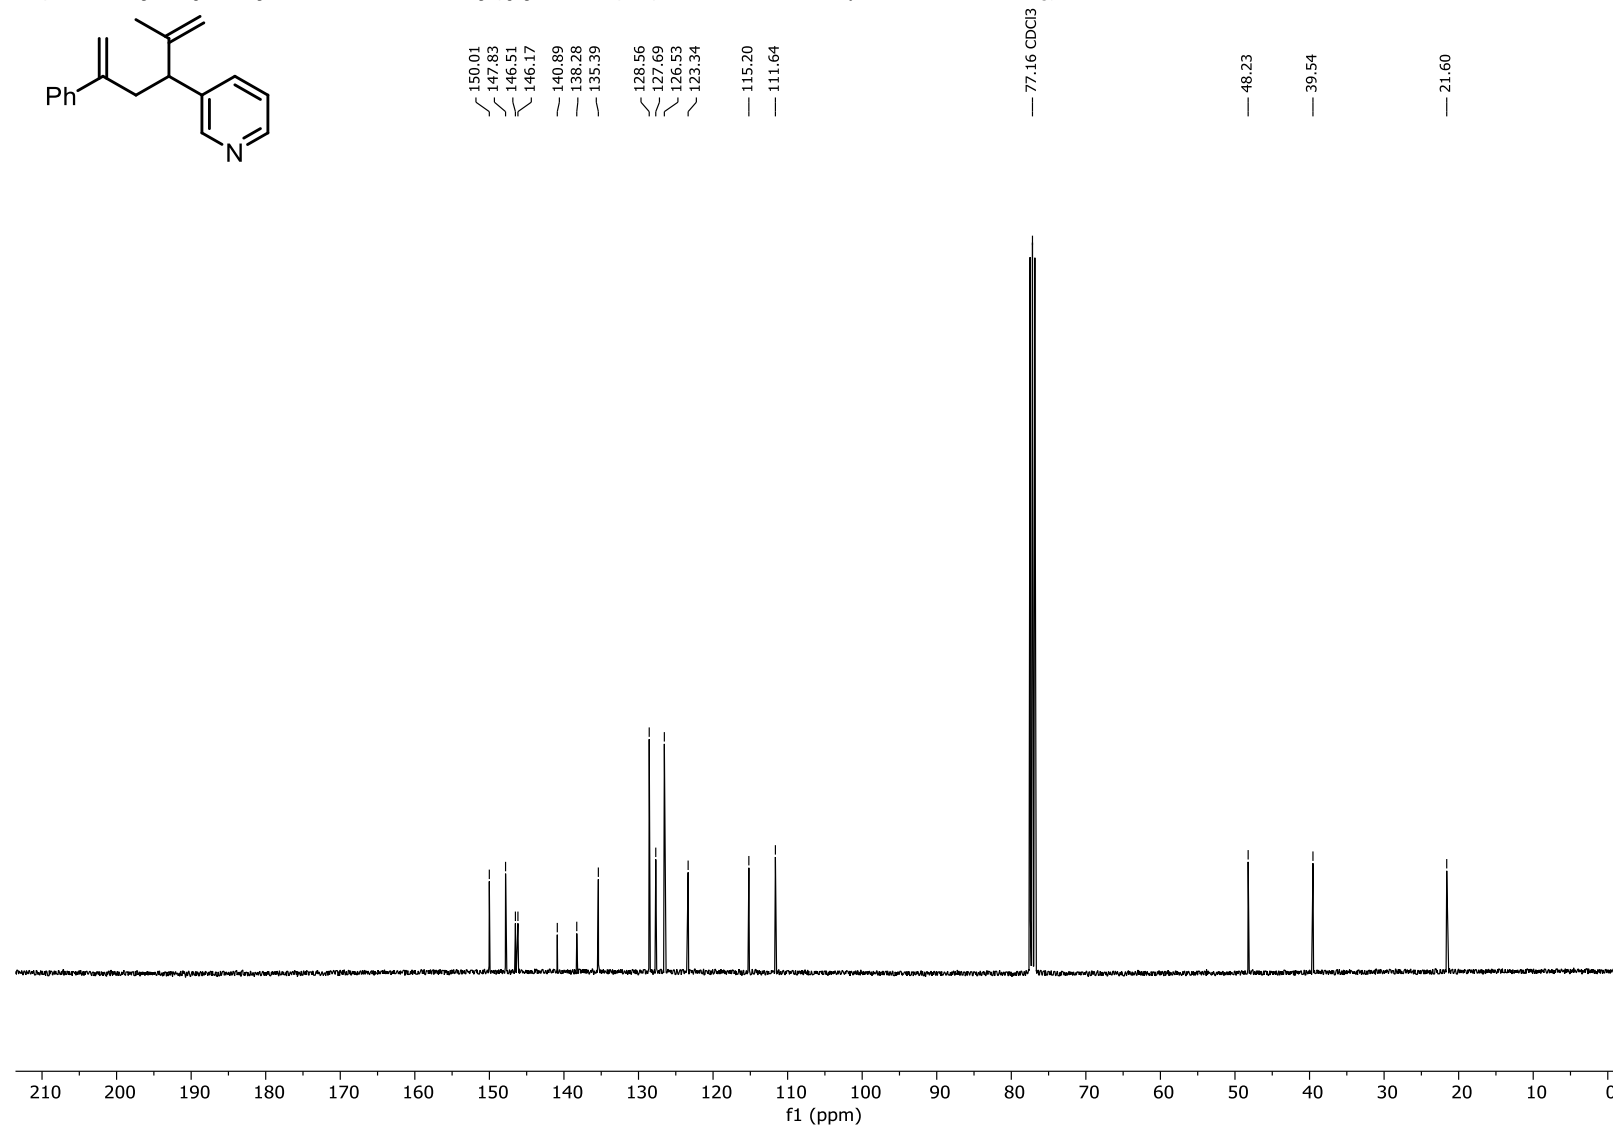

**(1-Allylcyclopentyl)(phenyl)methanone (S24):**  $^1\text{H}$  NMR (300 MHz,  $\text{CDCl}_3$ )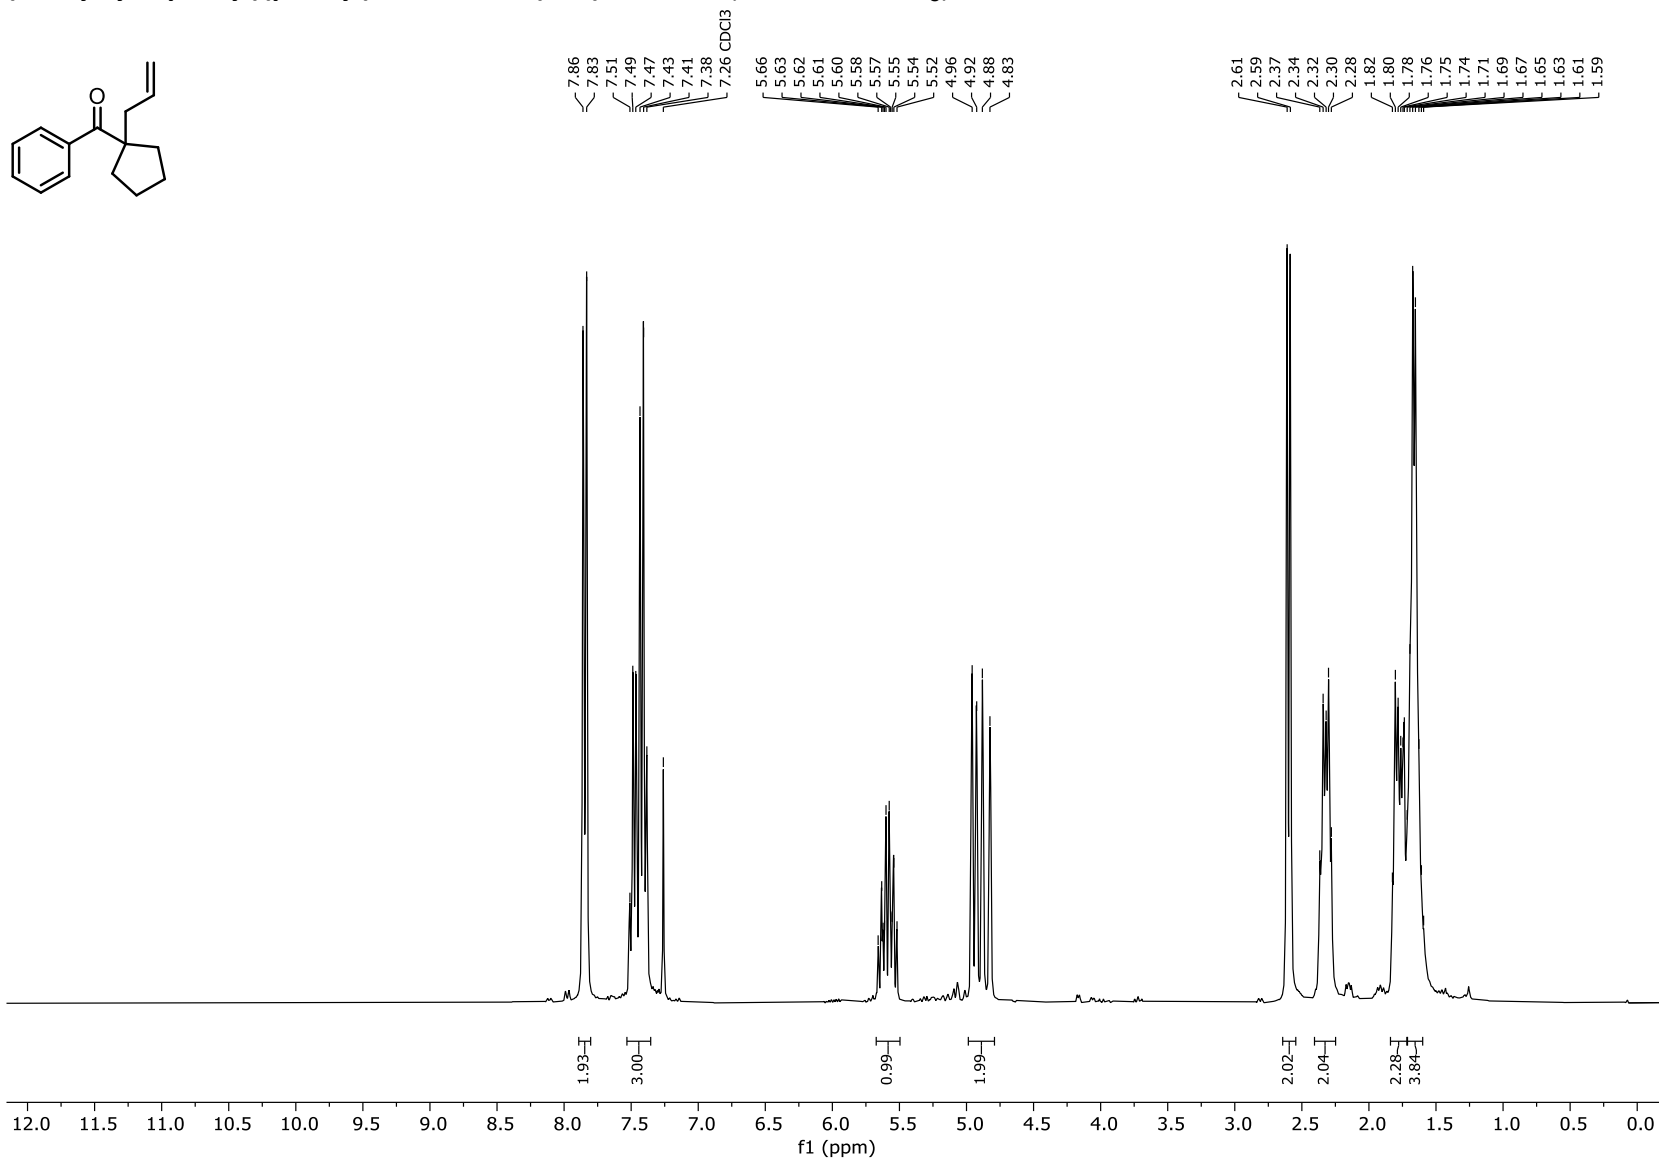

**(1-Allylcyclopentyl)(phenyl)methanone (S24):**  $^{13}\text{C}\{^1\text{H}\}$  NMR (101 MHz,  $\text{CDCl}_3$ )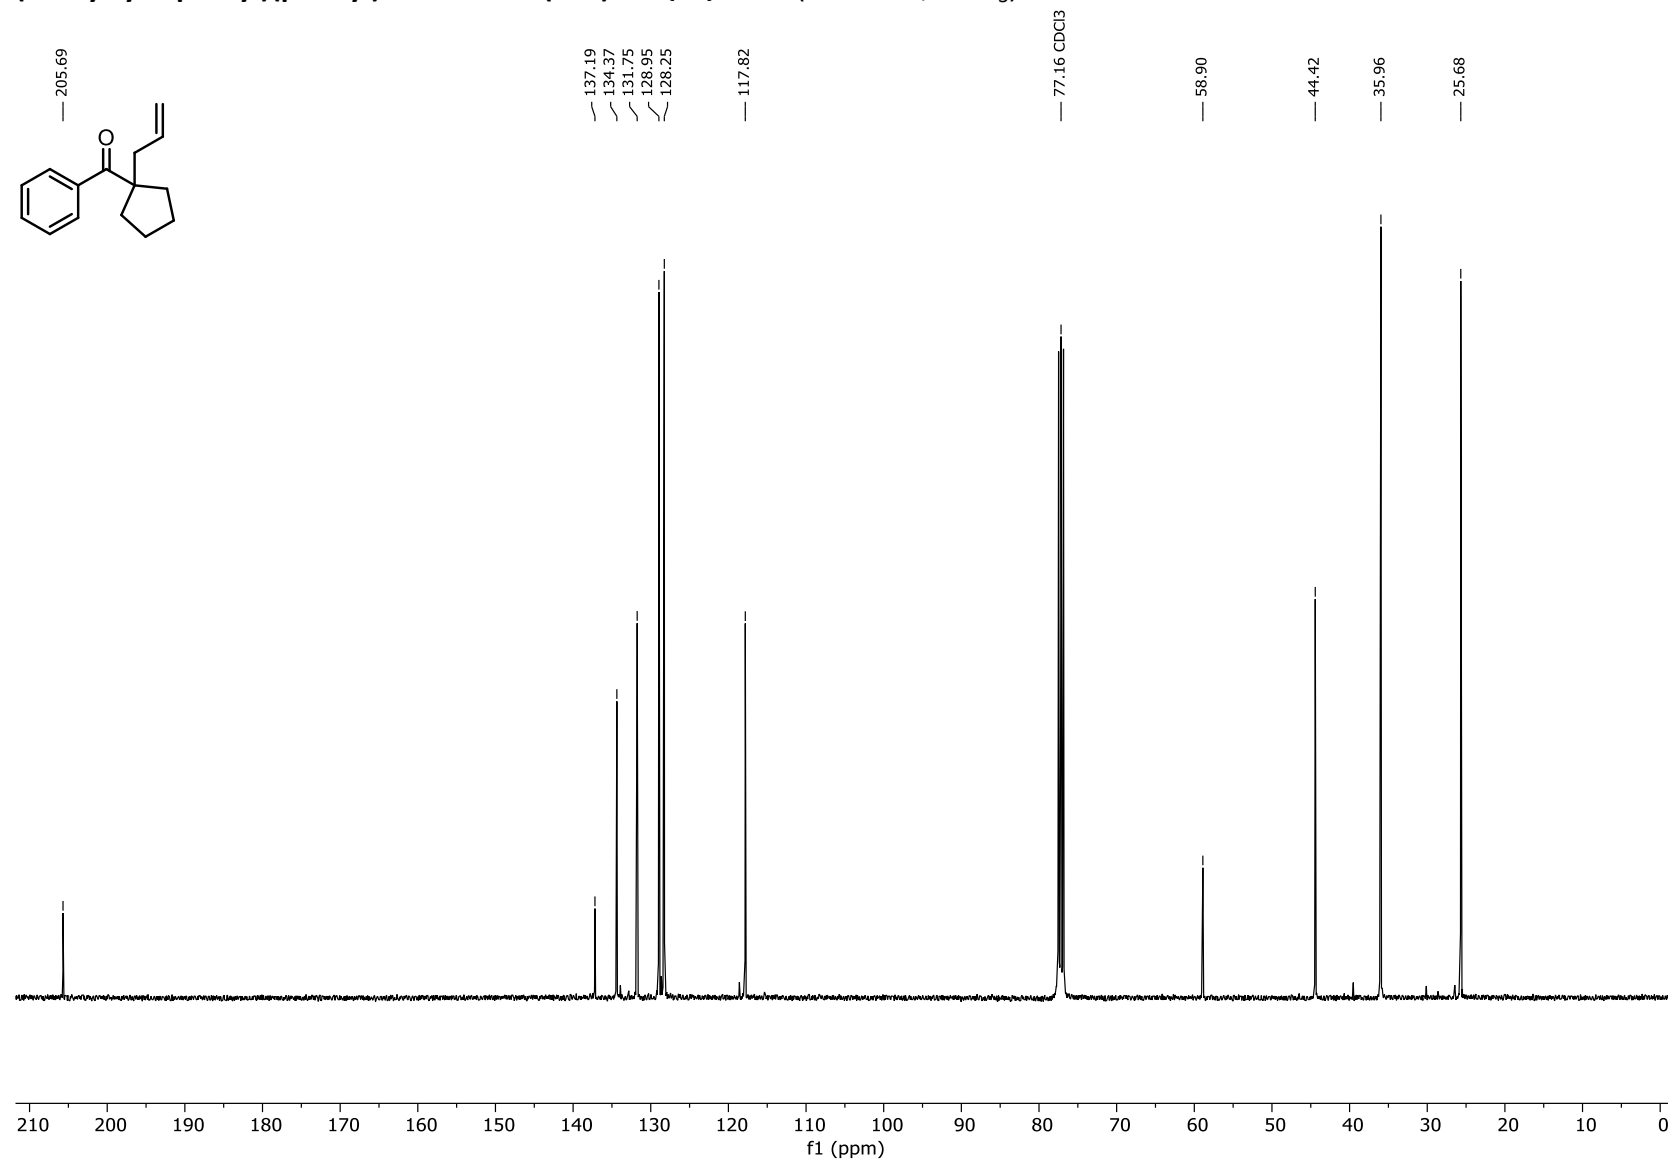

**(1-(1-Allylcyclopentyl)vinyl)benzene (1y):**  $^1\text{H}$  NMR (300 MHz,  $\text{CDCl}_3$ )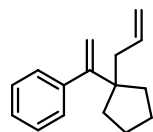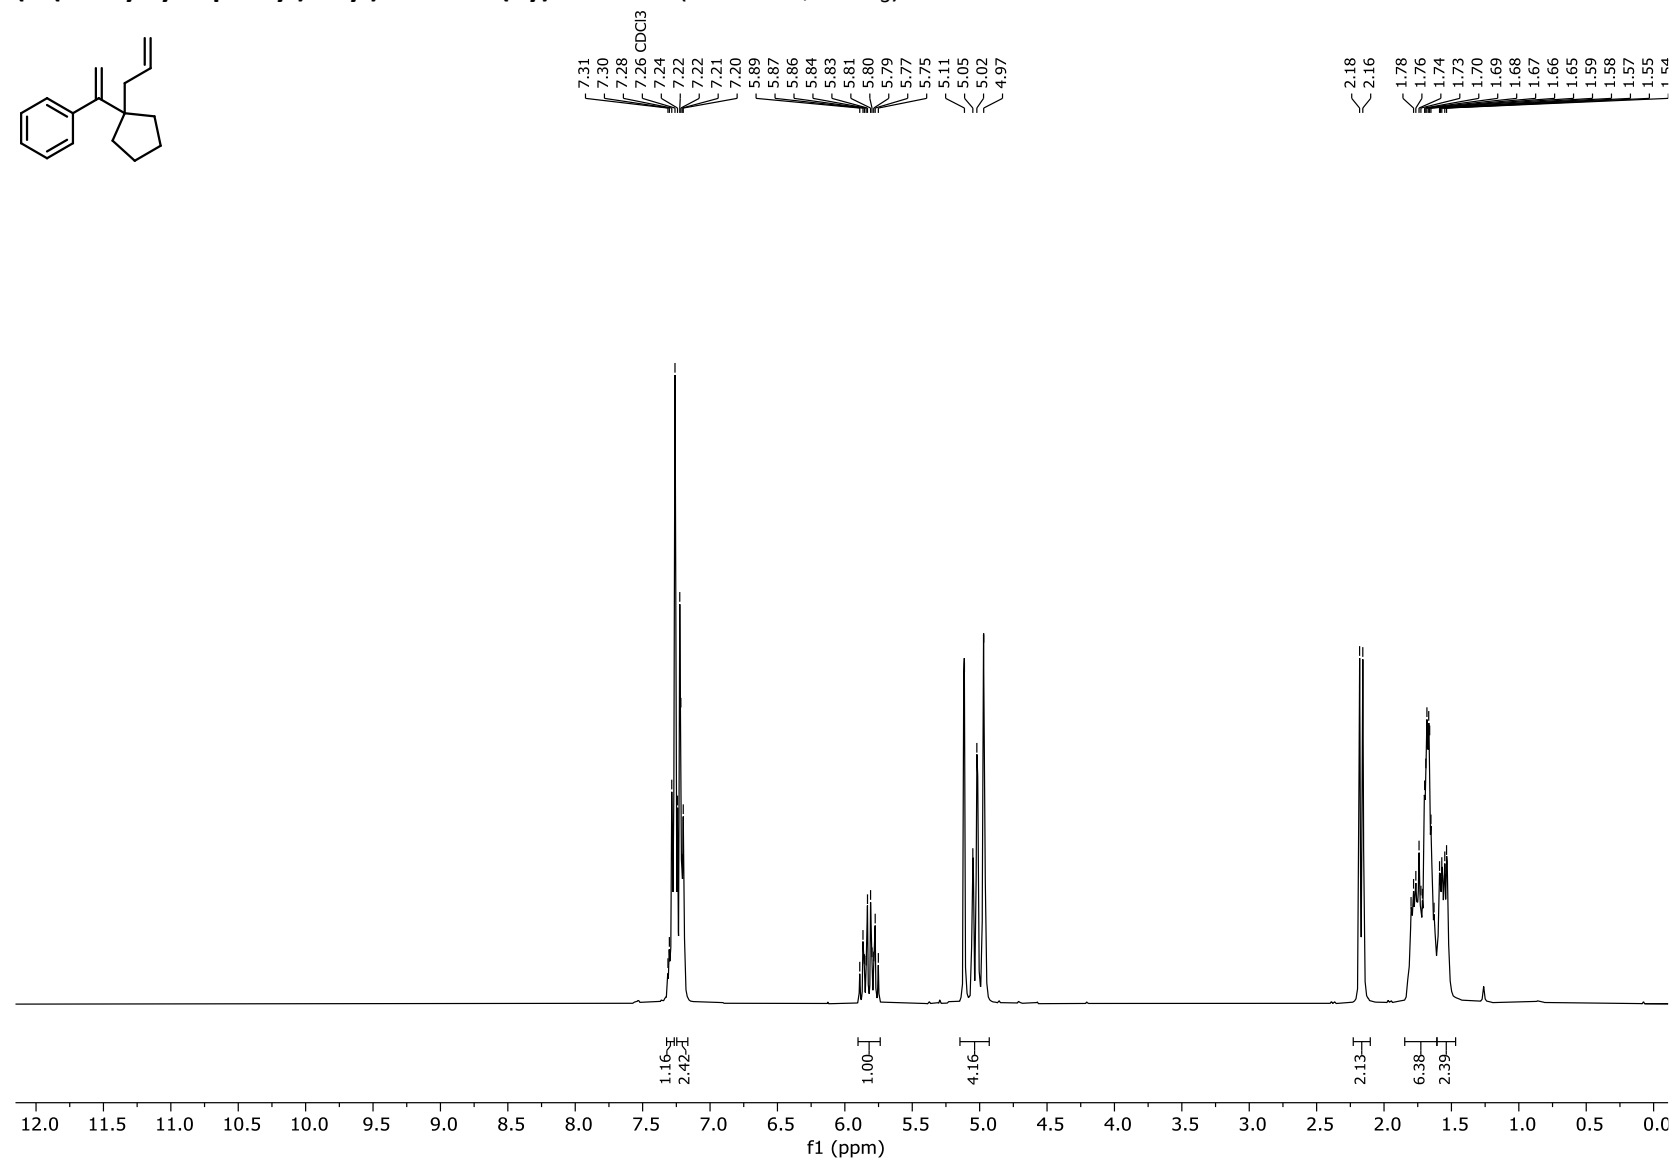

**(1-(1-Allylcyclopentyl)vinyl)benzene (1y):**  $^{13}\text{C}\{^1\text{H}\}$  NMR (101 MHz,  $\text{CDCl}_3$ )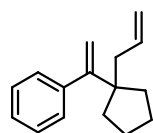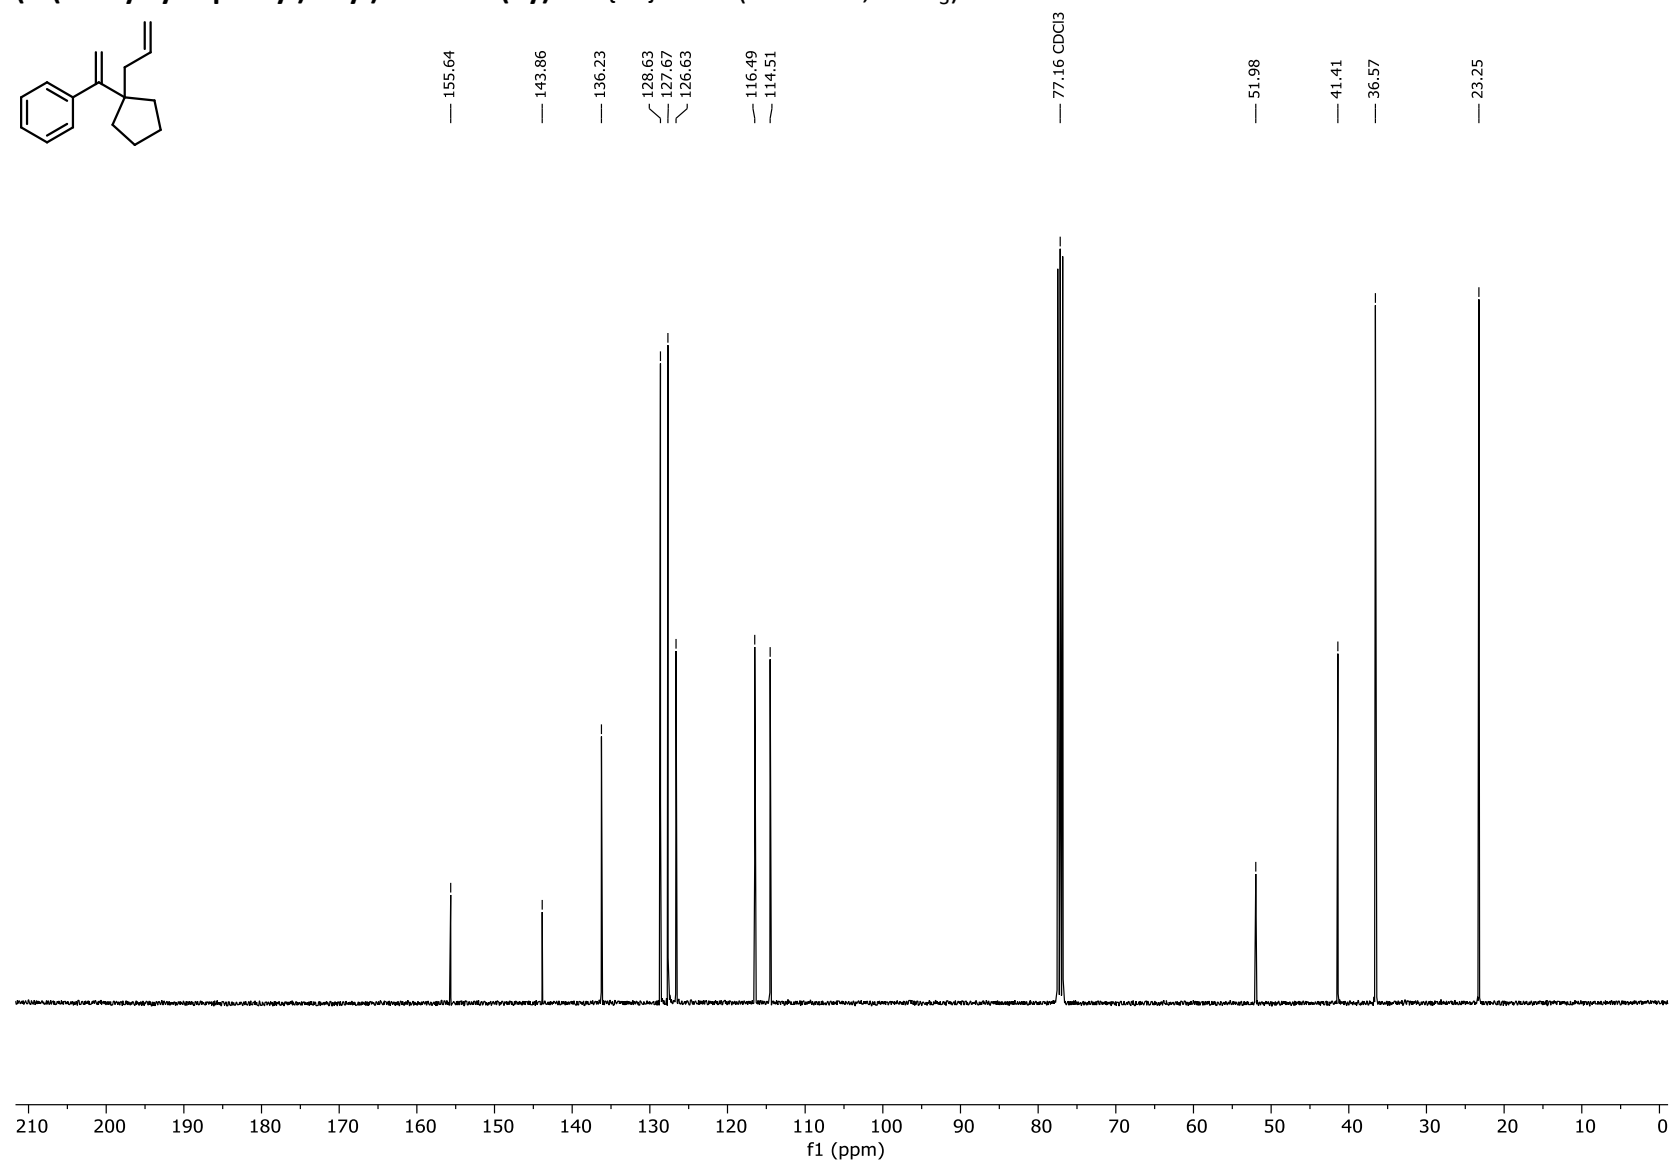

**1-Ethyl 7-methyl (E)-6-methylene-3-phenylhept-2-enedioate (1z):**  $^1\text{H}$  NMR (400 MHz,  $\text{CDCl}_3$ )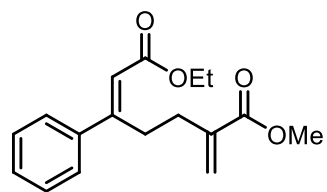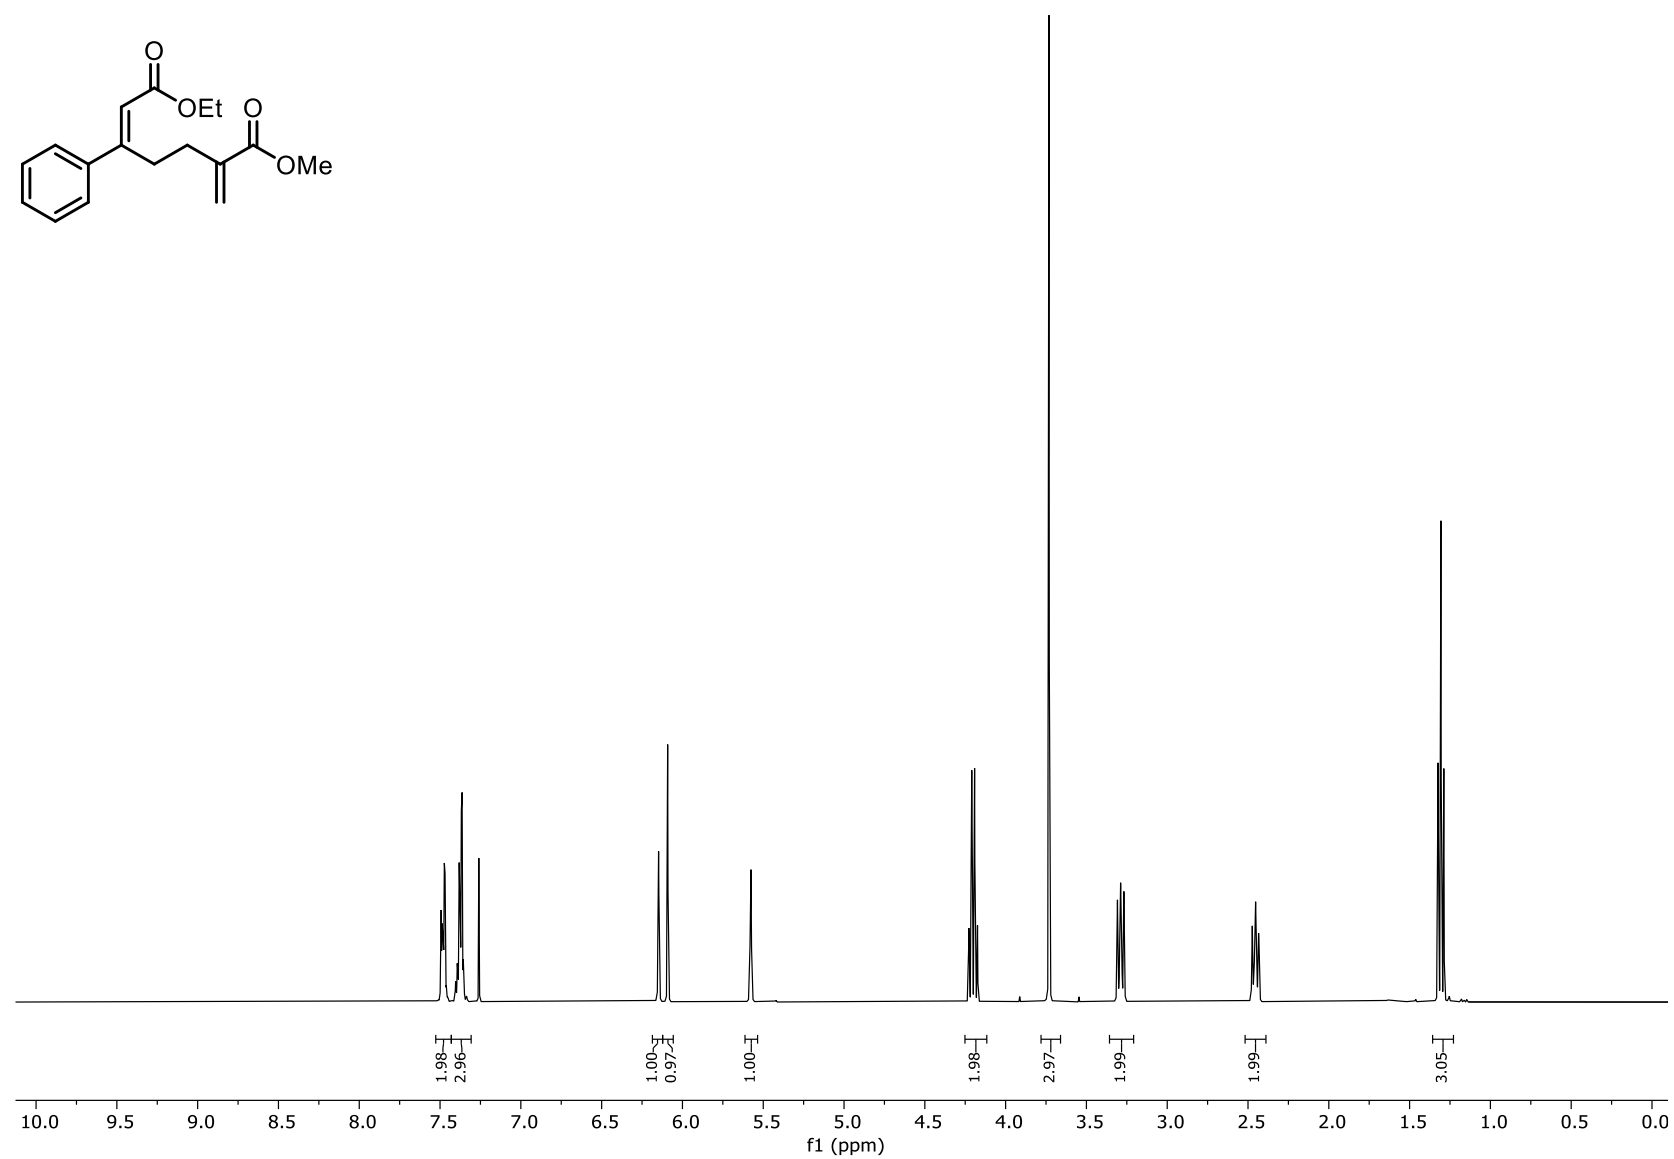



1-Ethyl 7-methyl (*E*)-6-methylene-3-phenylhept-2-enedioate (**1z**):  $^{13}\text{C}$  NMR (101 MHz,  $\text{CDCl}_3$ )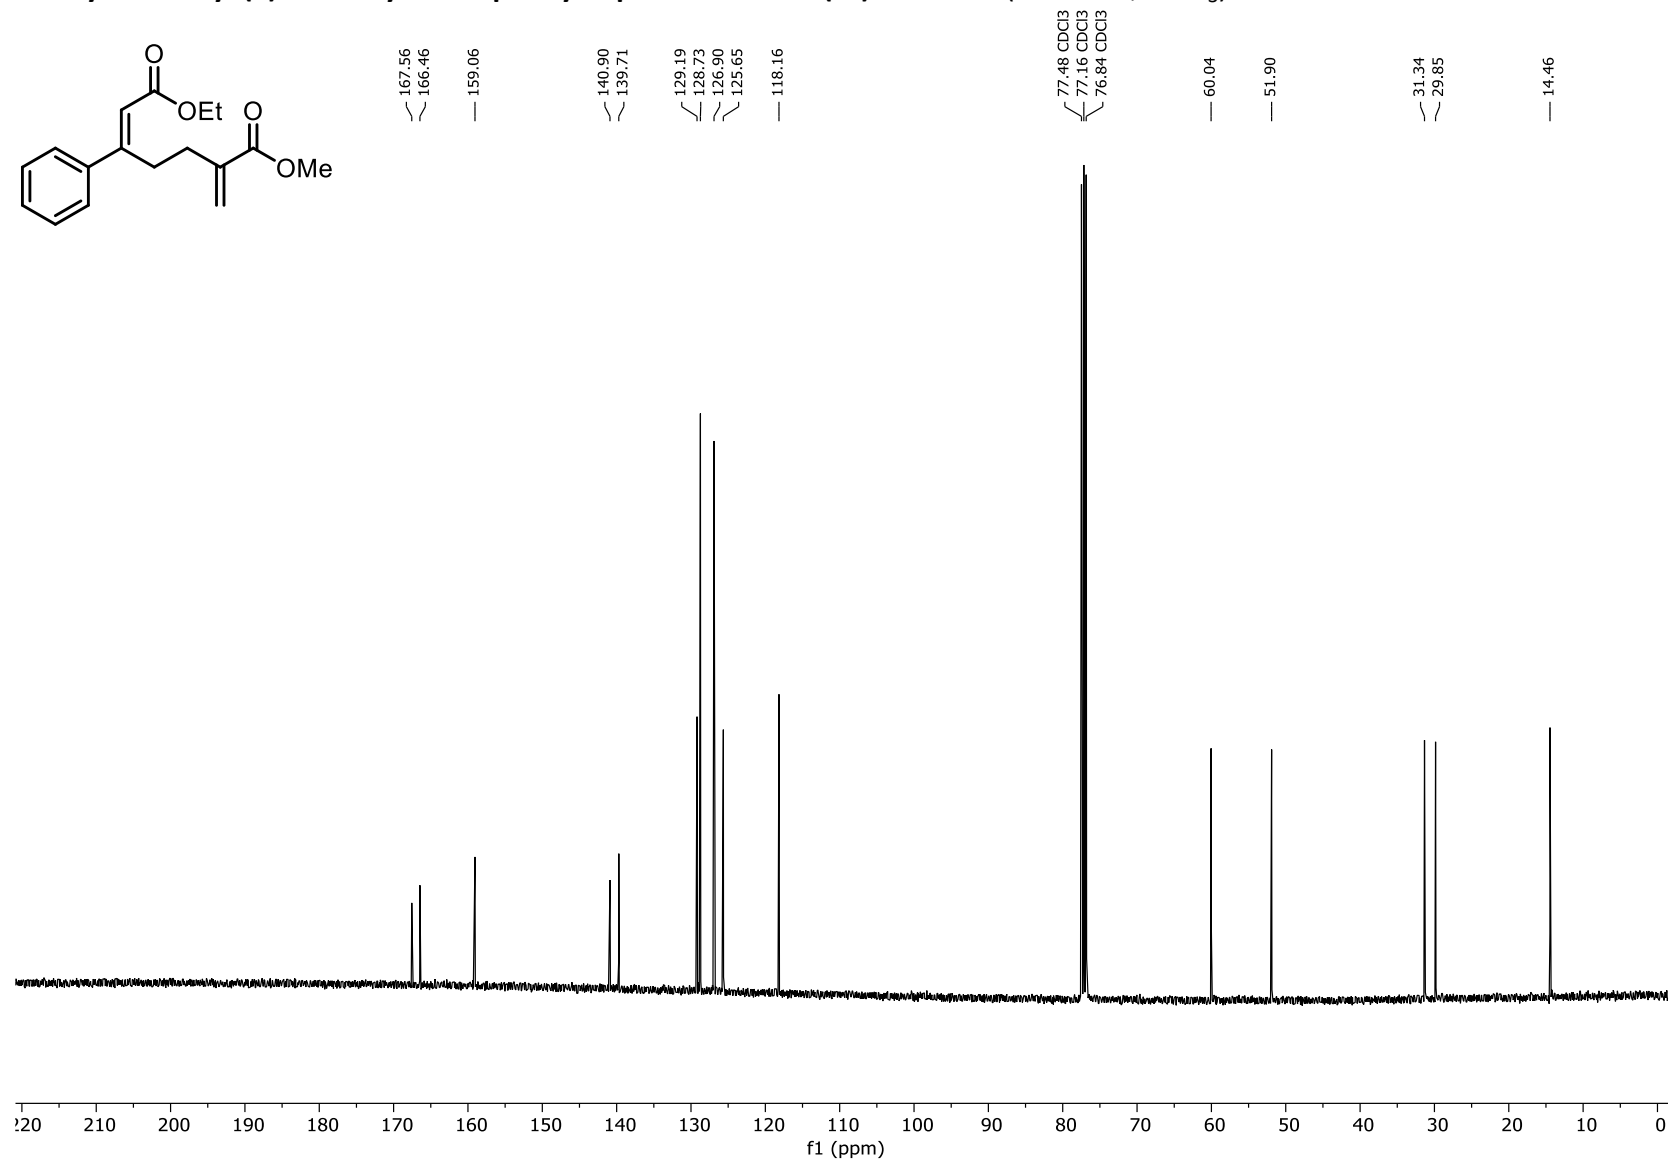

1-Ethyl 7-methyl (*E*)-6-methylene-3-phenylhept-2-enedioate (**1z**): NOESY (400 MHz, CDCl<sub>3</sub>)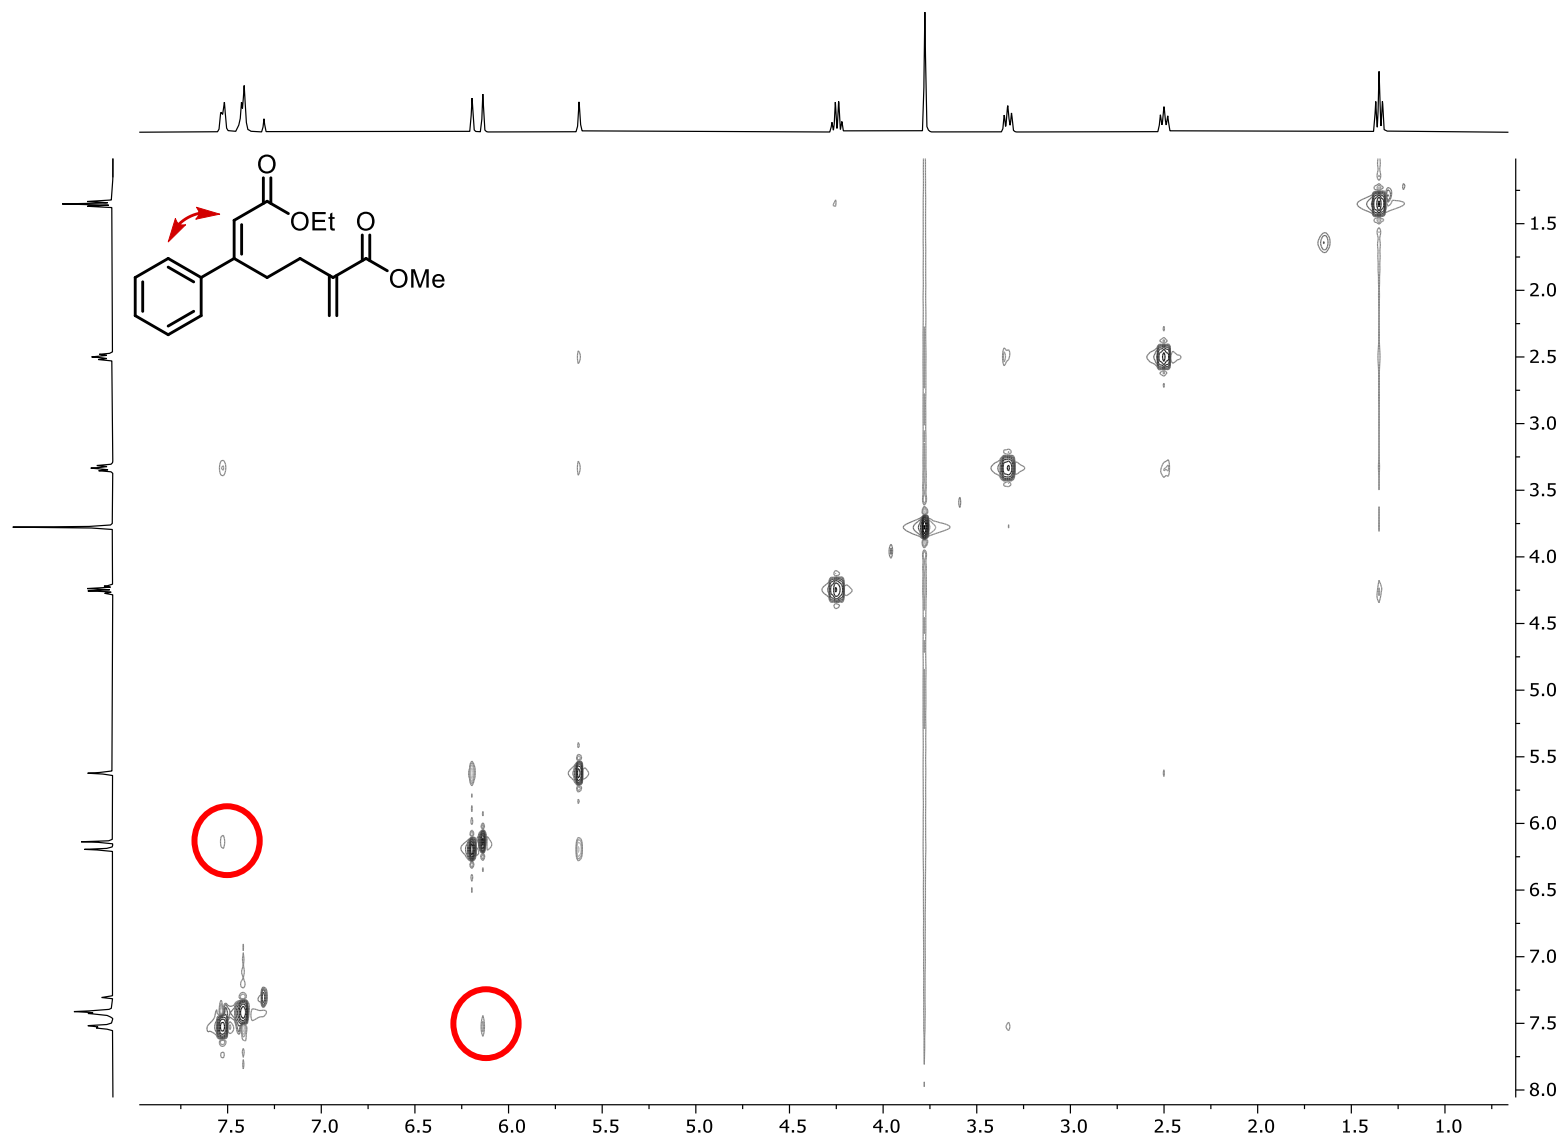

Methyl 4-hydroxy-2-methylene-5-phenylhept-5-enoate (1aa):  $^1\text{H}$  NMR (300 MHz,  $\text{CDCl}_3$ )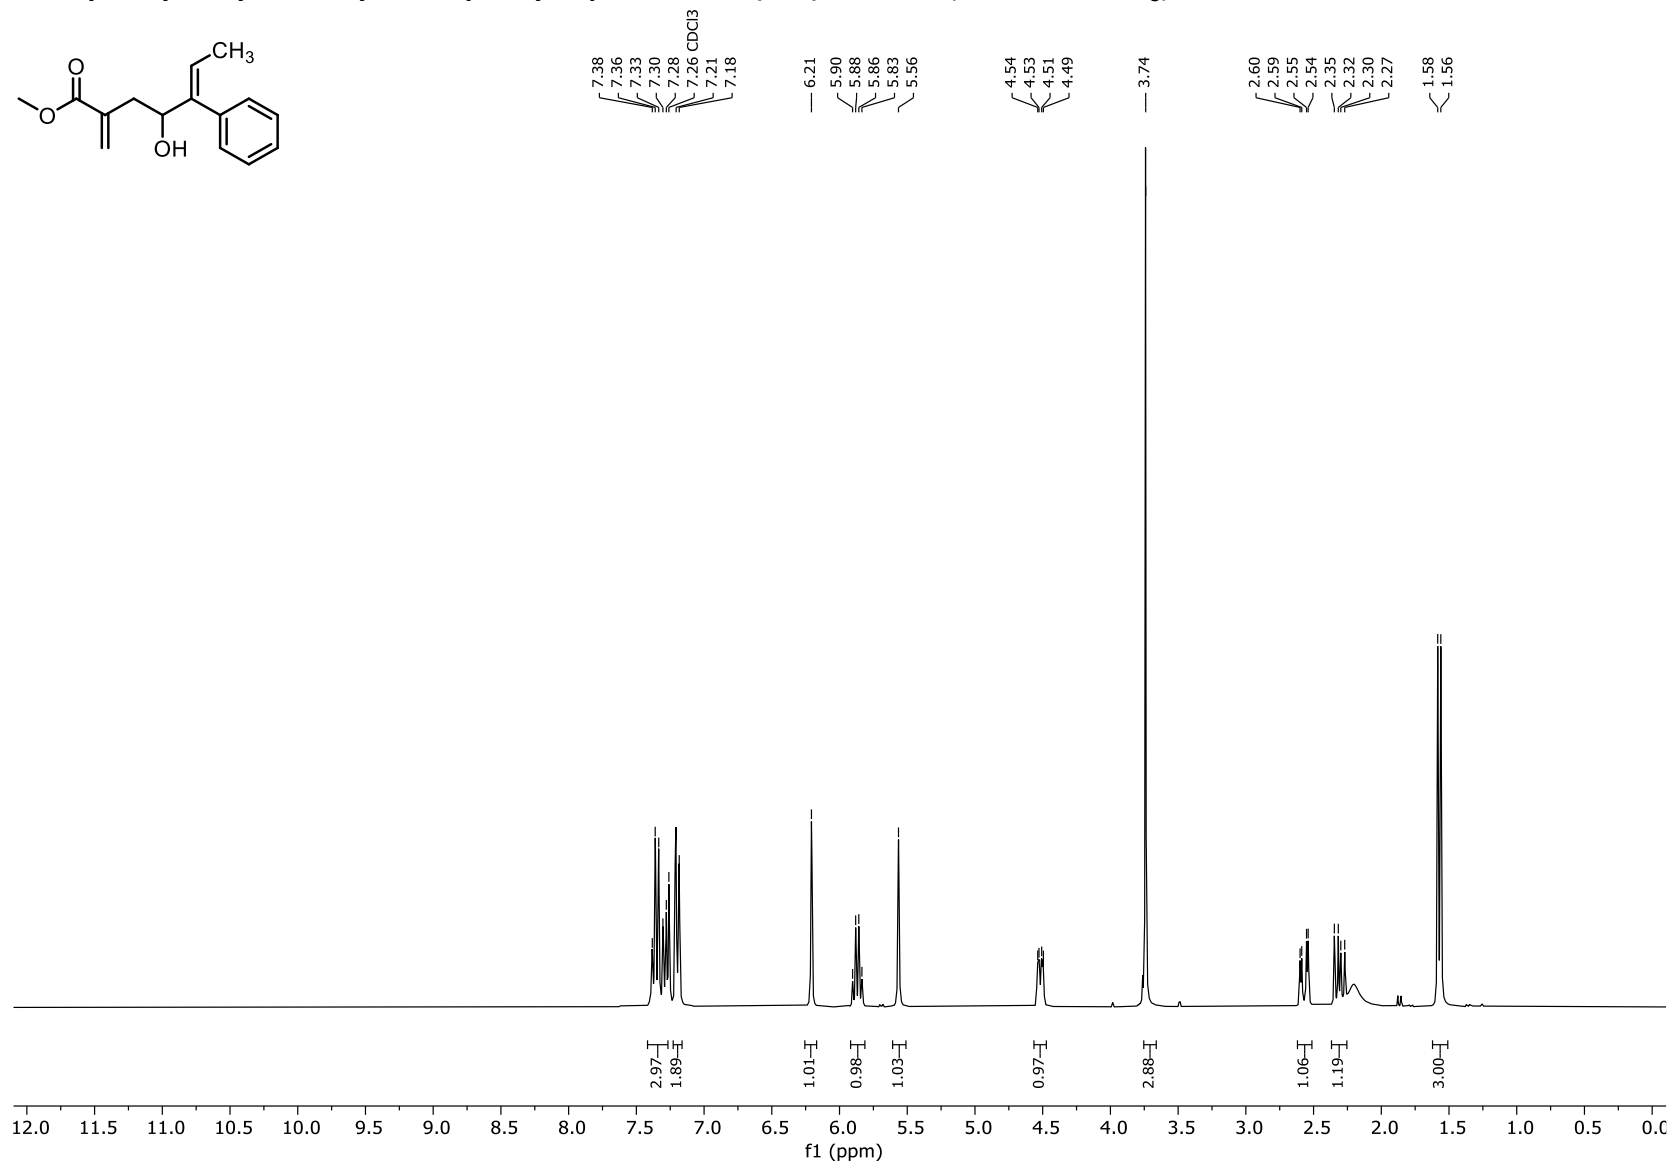

**Methyl 4-hydroxy-2-methylene-5-phenylhept-5-enoate (1aa):**  $^{13}\text{C}\{^1\text{H}\}$  NMR (101 MHz,  $\text{CDCl}_3$ )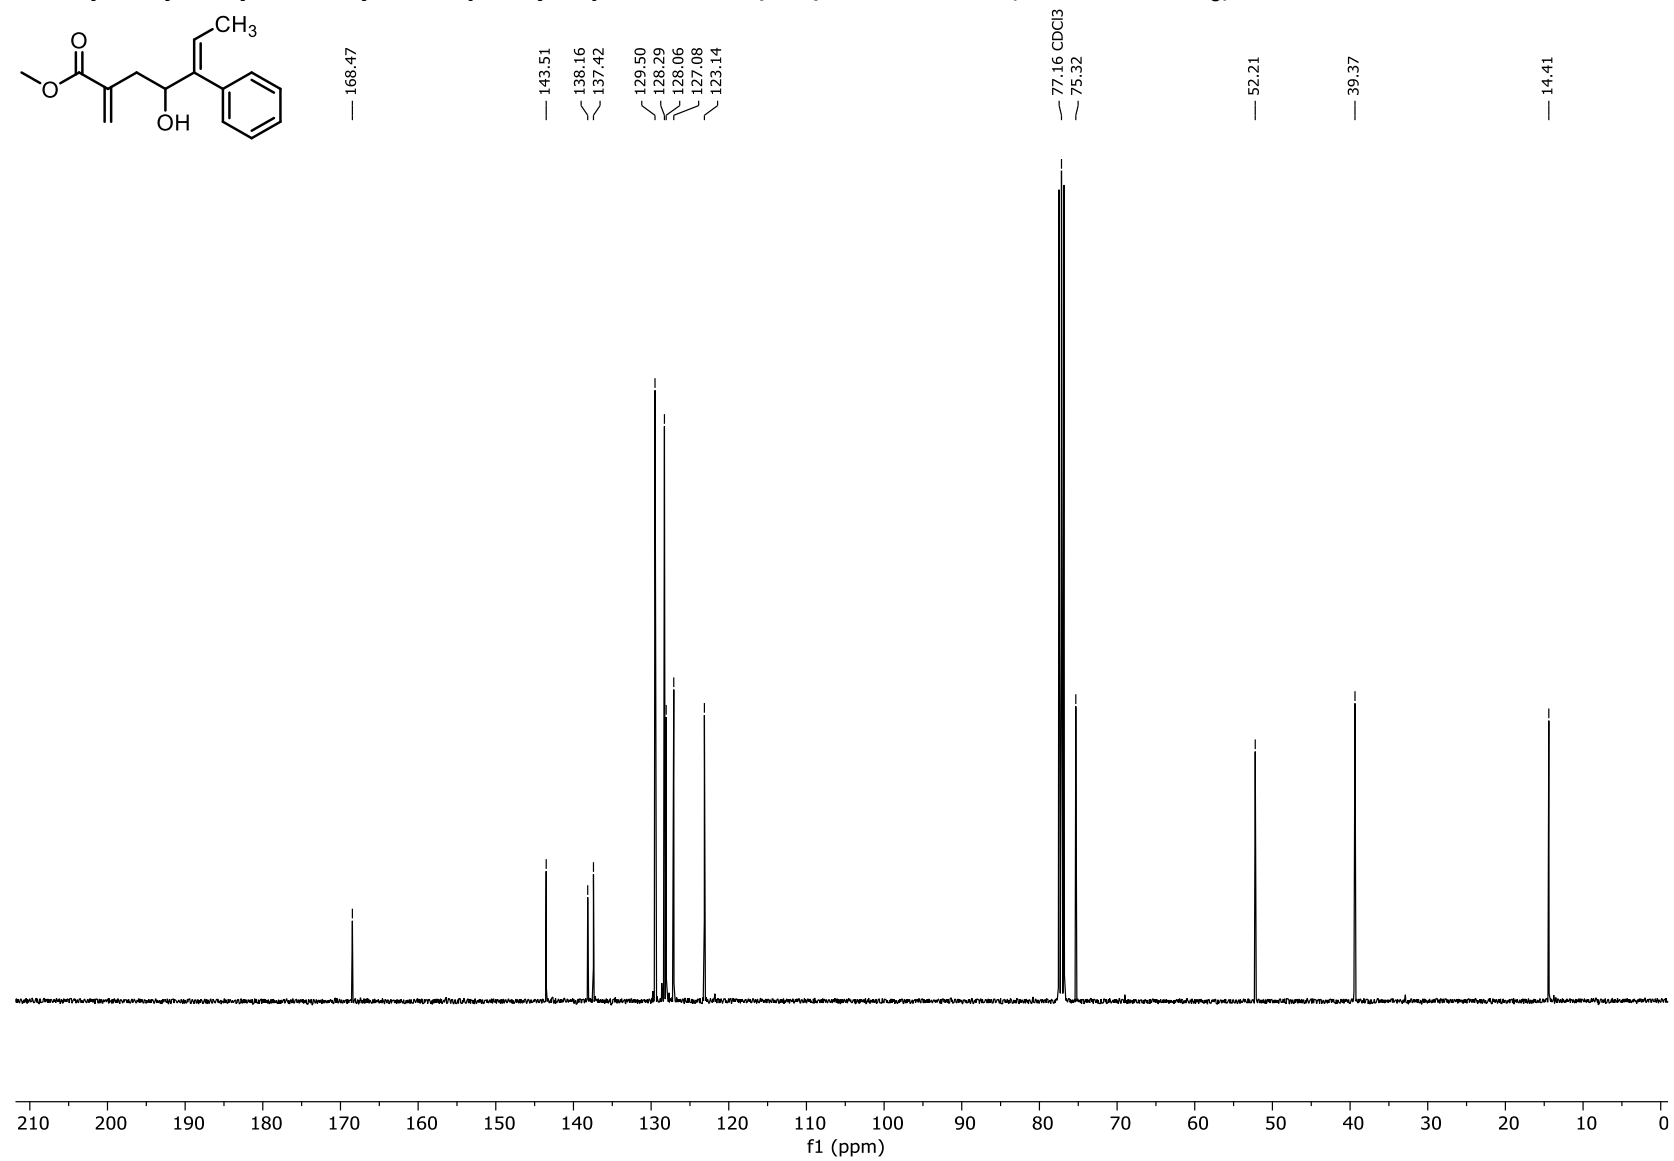

**(3,3,4,4-tetrafluorohexa-1,5-diene-2,5-diyl)dibenzene (1ab):**  $^1\text{H}$  NMR (300 MHz,  $\text{CDCl}_3$ )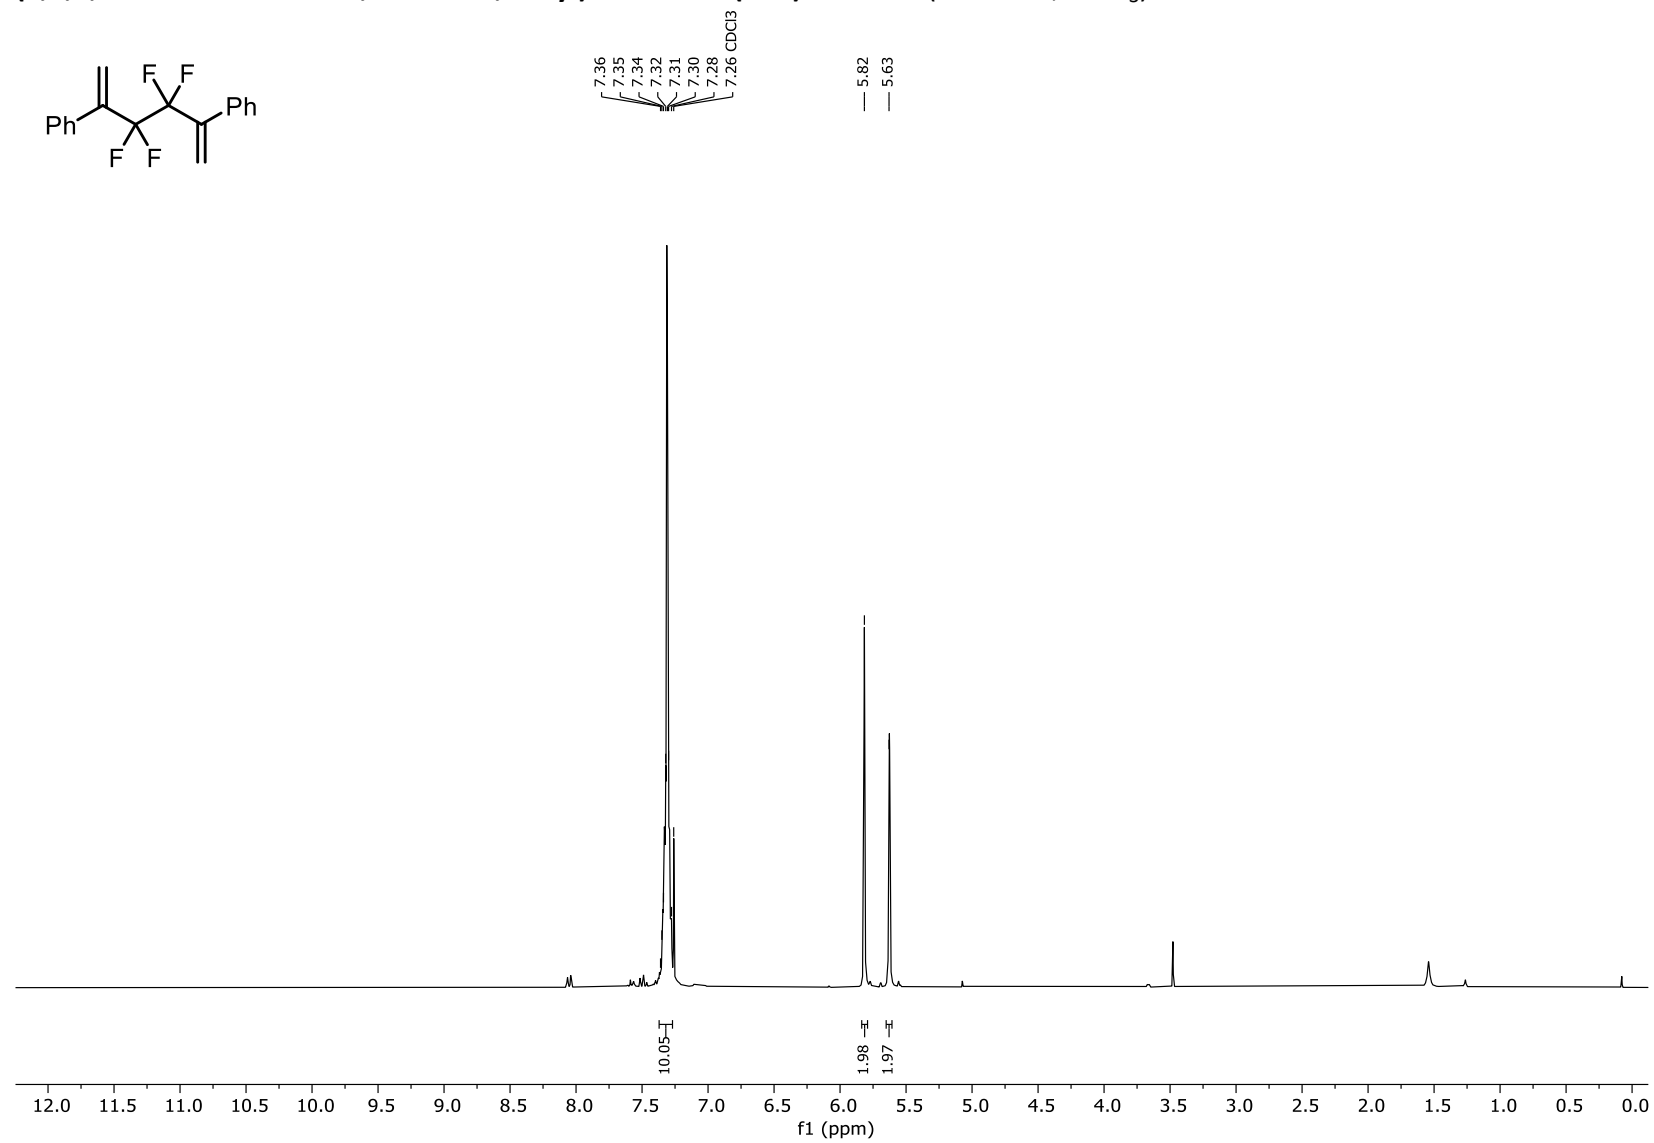

(3,3,4,4-tetrafluorohexa-1,5-diene-2,5-diyl)dibenzene (**1ab**):  $^{13}\text{C}\{^1\text{H}\}$  NMR (101 MHz,  $\text{CDCl}_3$ )

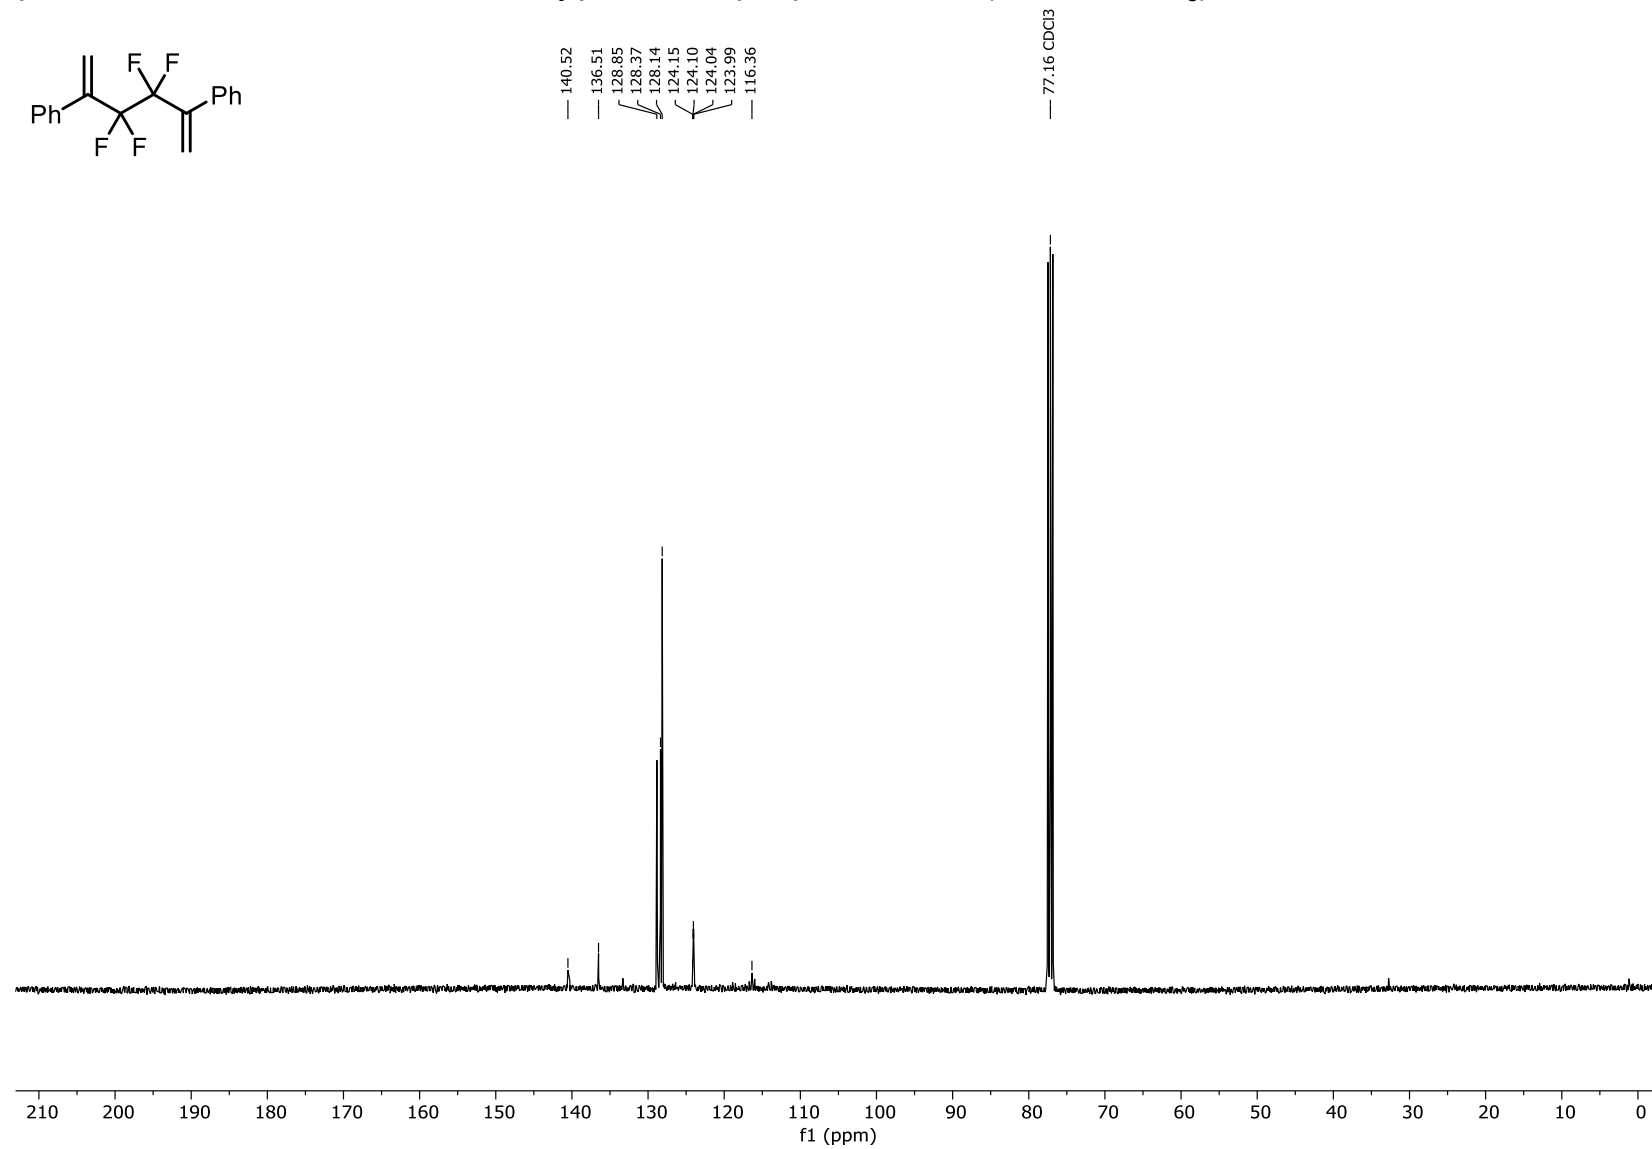

(3,3,4,4-tetrafluorohexa-1,5-diene-2,5-diyl)dibenzene (1ab):  $^{19}\text{F}\{^1\text{H}\}$  NMR (282 MHz,  $\text{CDCl}_3$ )

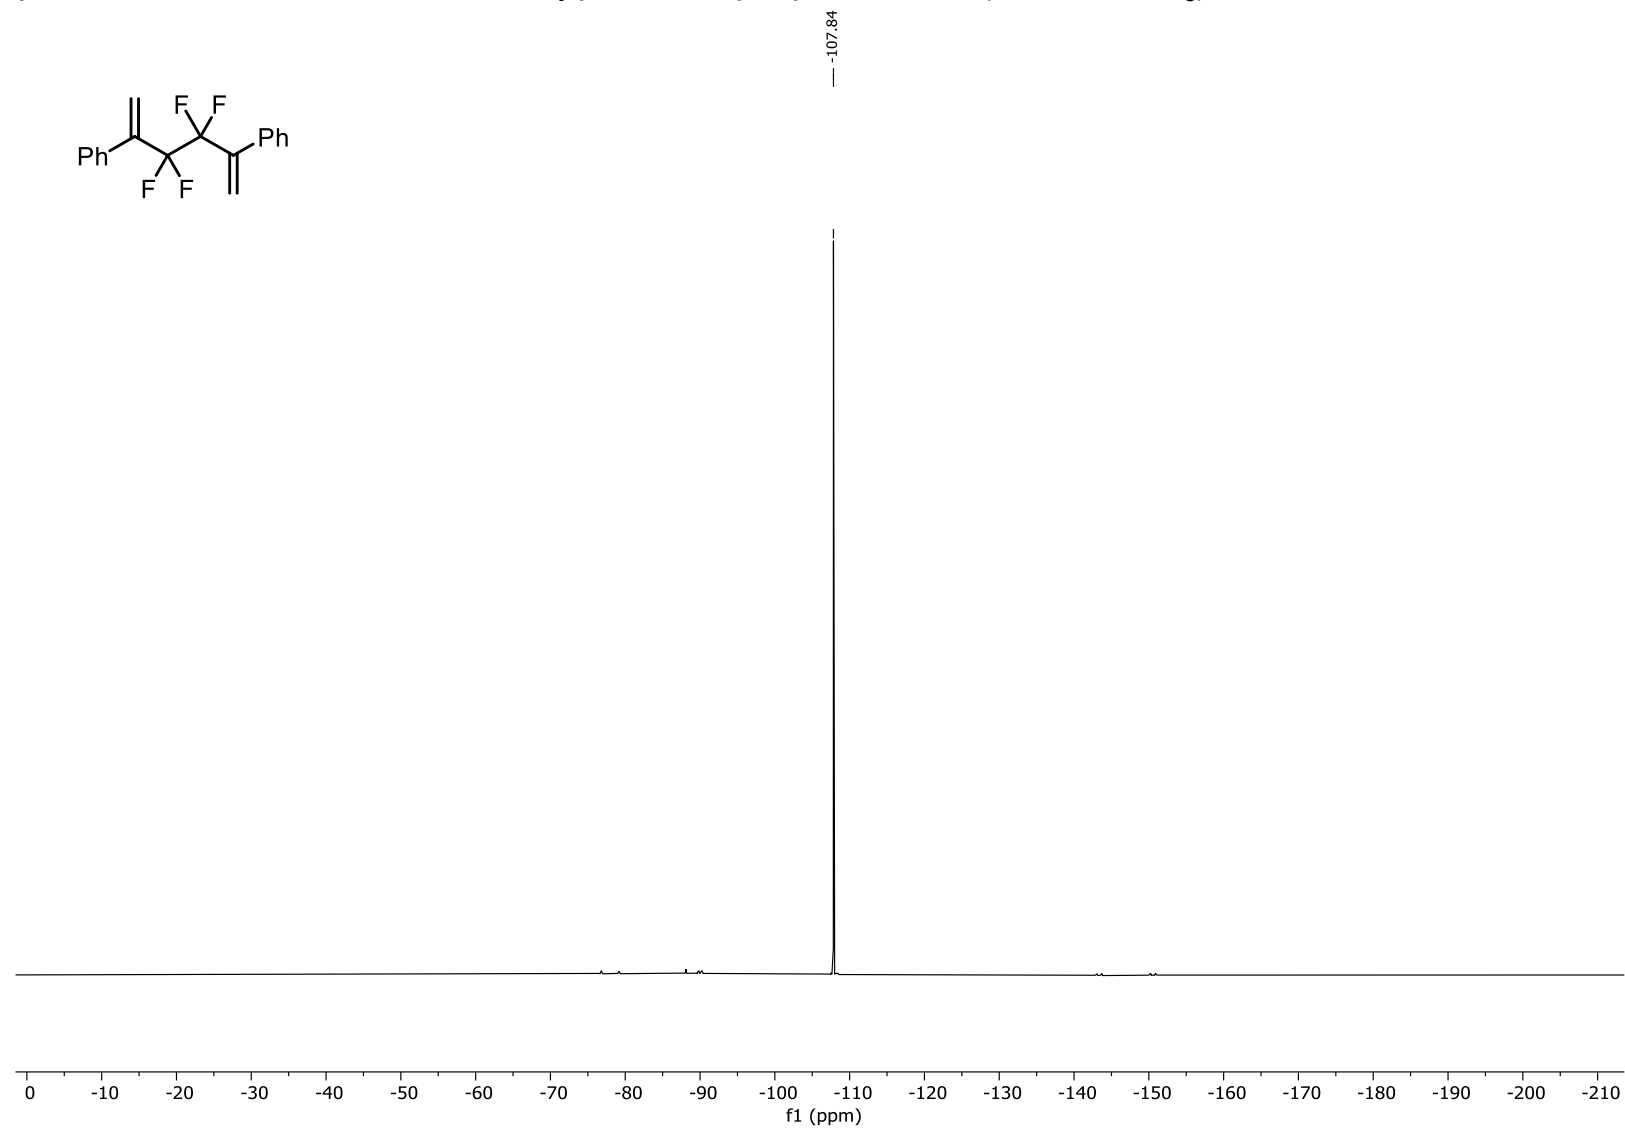

## 7.2 NMR Spectra of BCH 2a–2ab

1,4-Diphenylbicyclo[2.1.1]hexane (2a):  $^1\text{H}$  NMR (300 MHz,  $\text{CDCl}_3$ )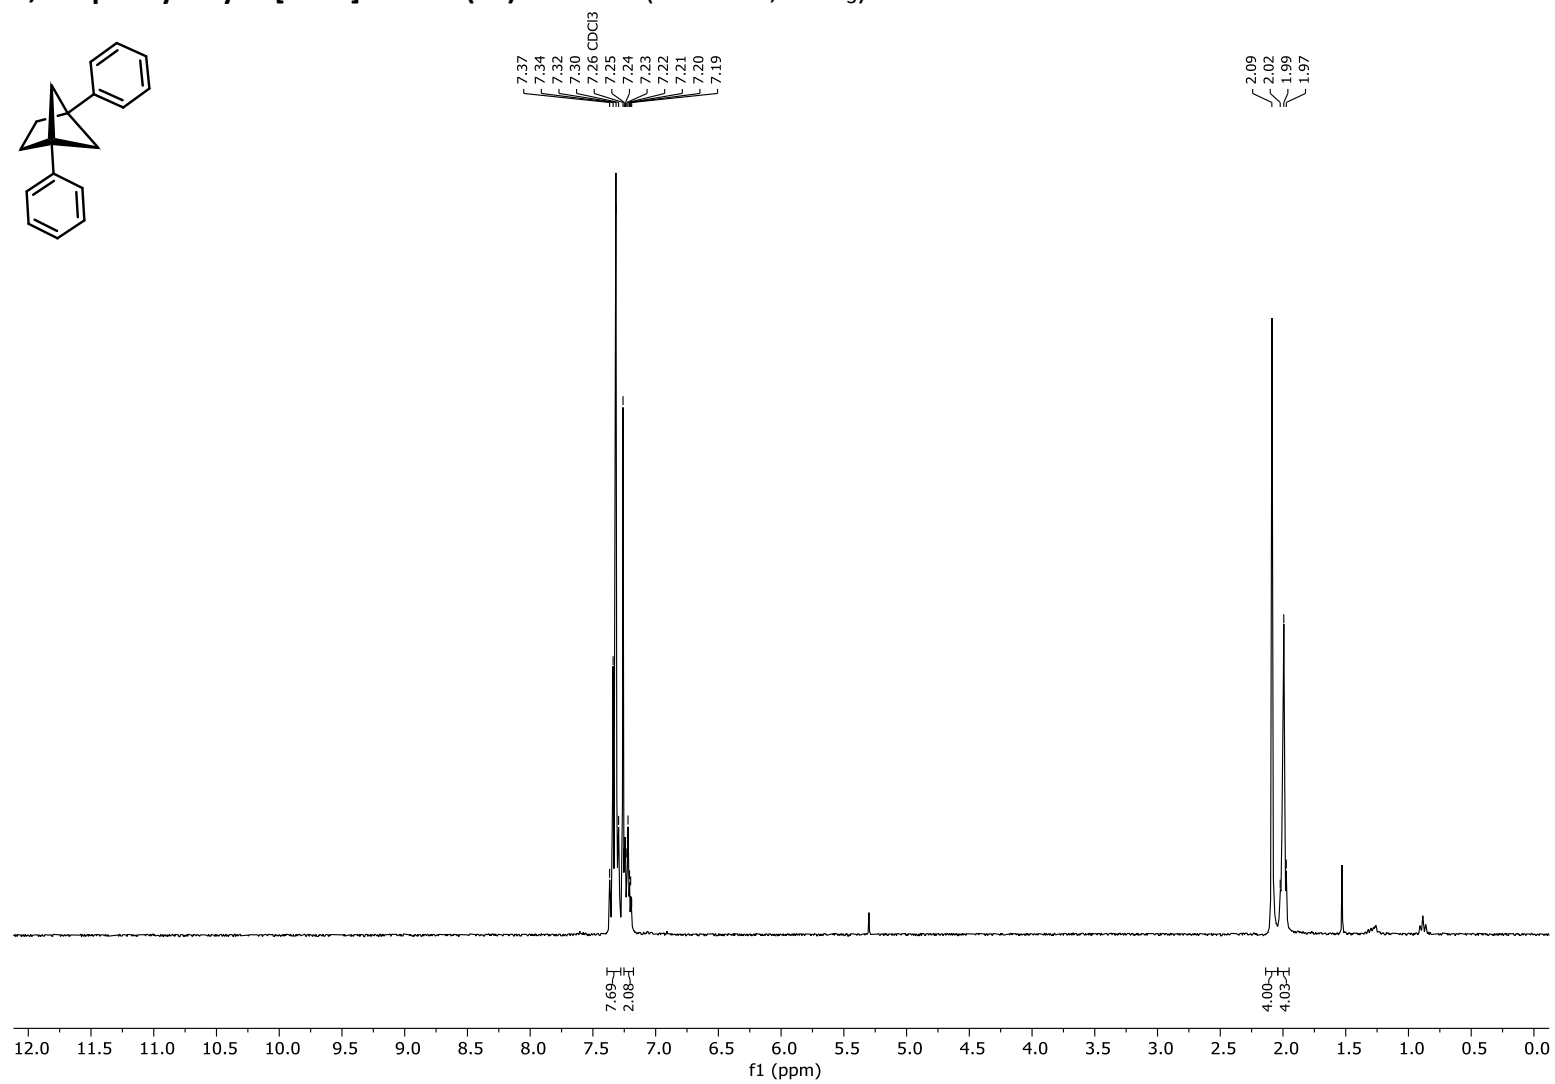



**1,4-Diphenylbicyclo[2.1.1]hexane (2a):**  $^{13}\text{C}\{^1\text{H}\}$  NMR (101 MHz,  $\text{CDCl}_3$ )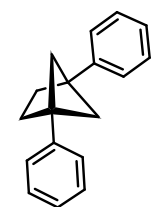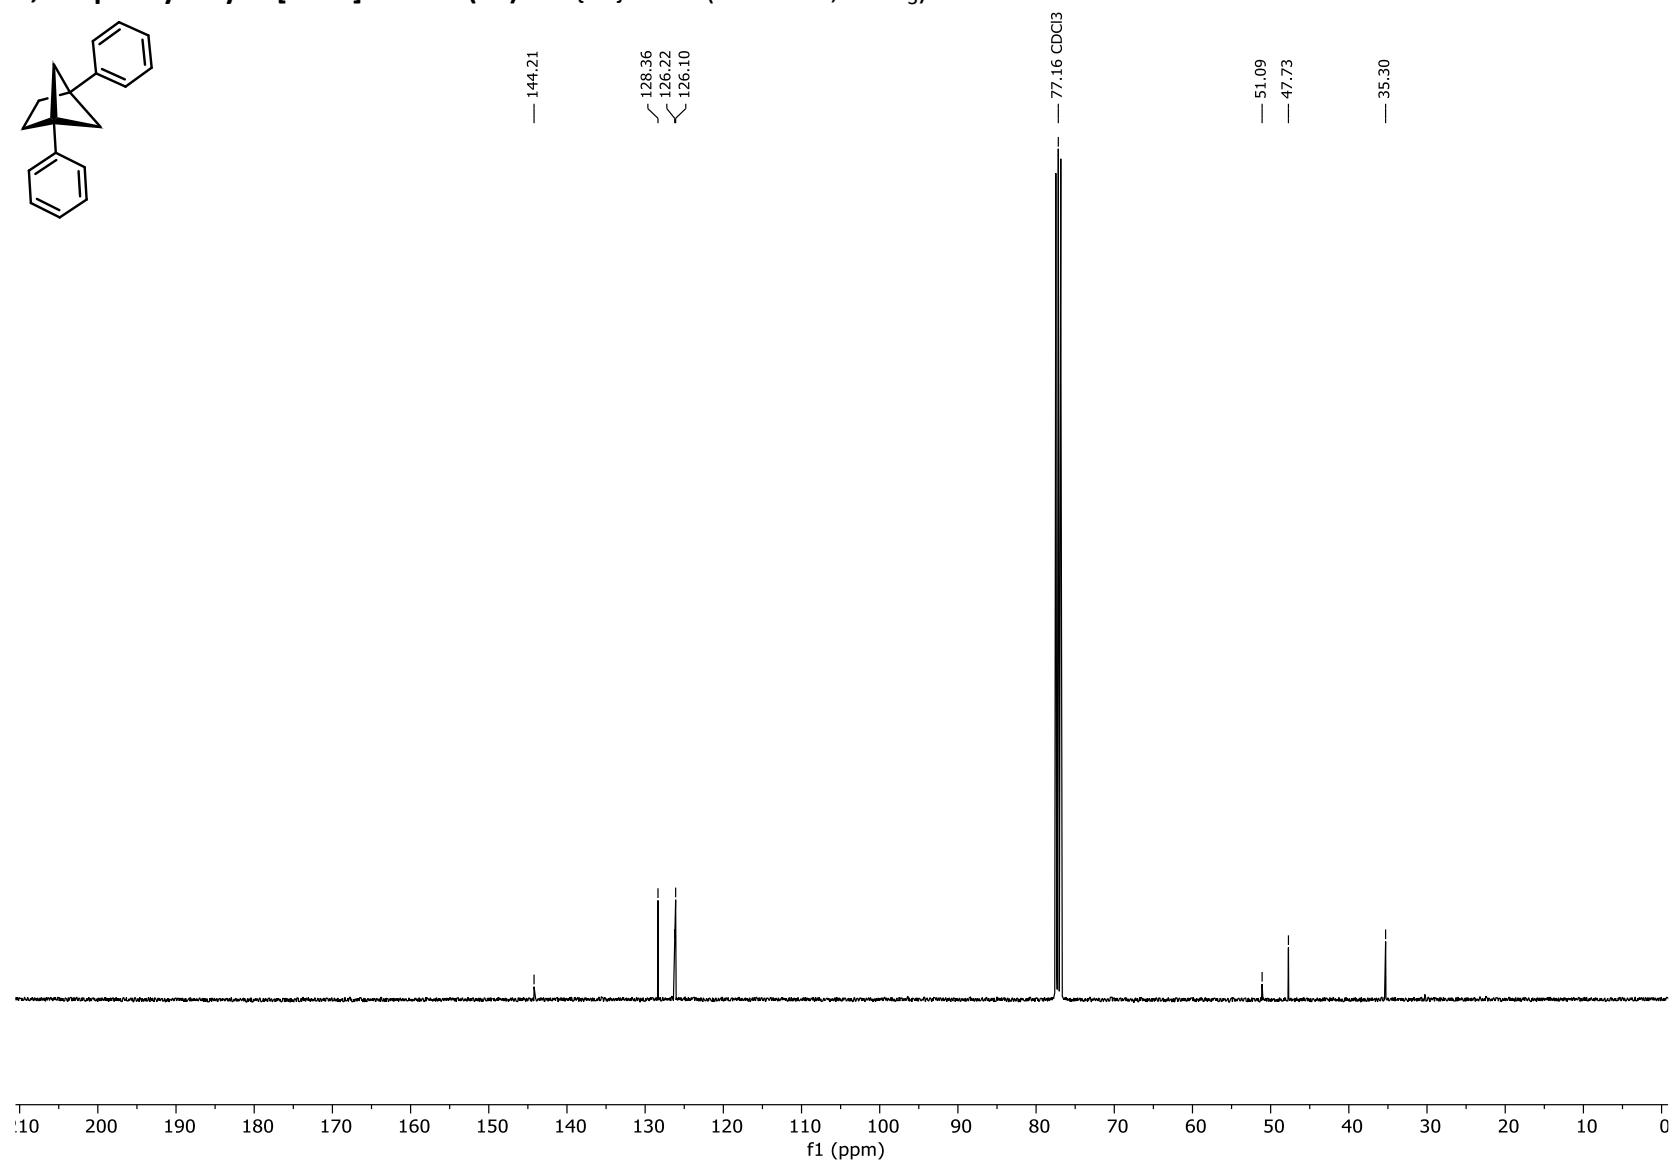

1-Phenylbicyclo[2.1.1]hexane (2b):  $^1\text{H}$  NMR (300 MHz,  $\text{CDCl}_3$ )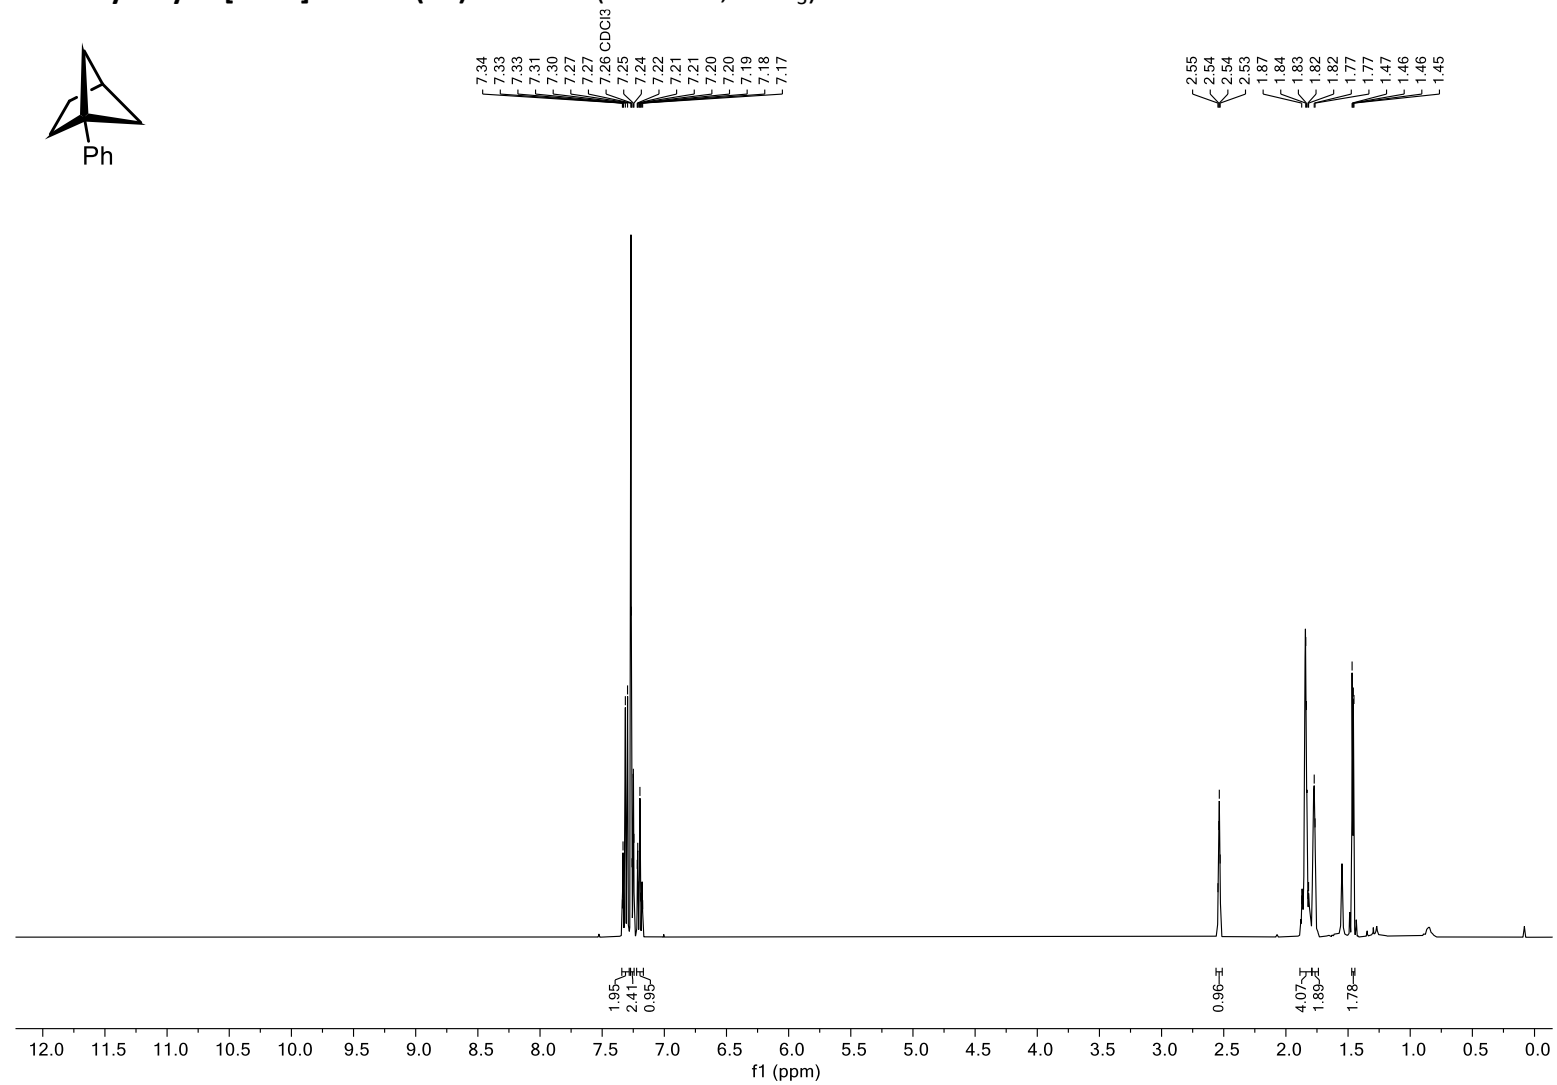

**1-Phenylbicyclo[2.1.1]hexane (2b):**  $^{13}\text{C}\{^1\text{H}\}$  NMR (101 MHz,  $\text{CDCl}_3$ )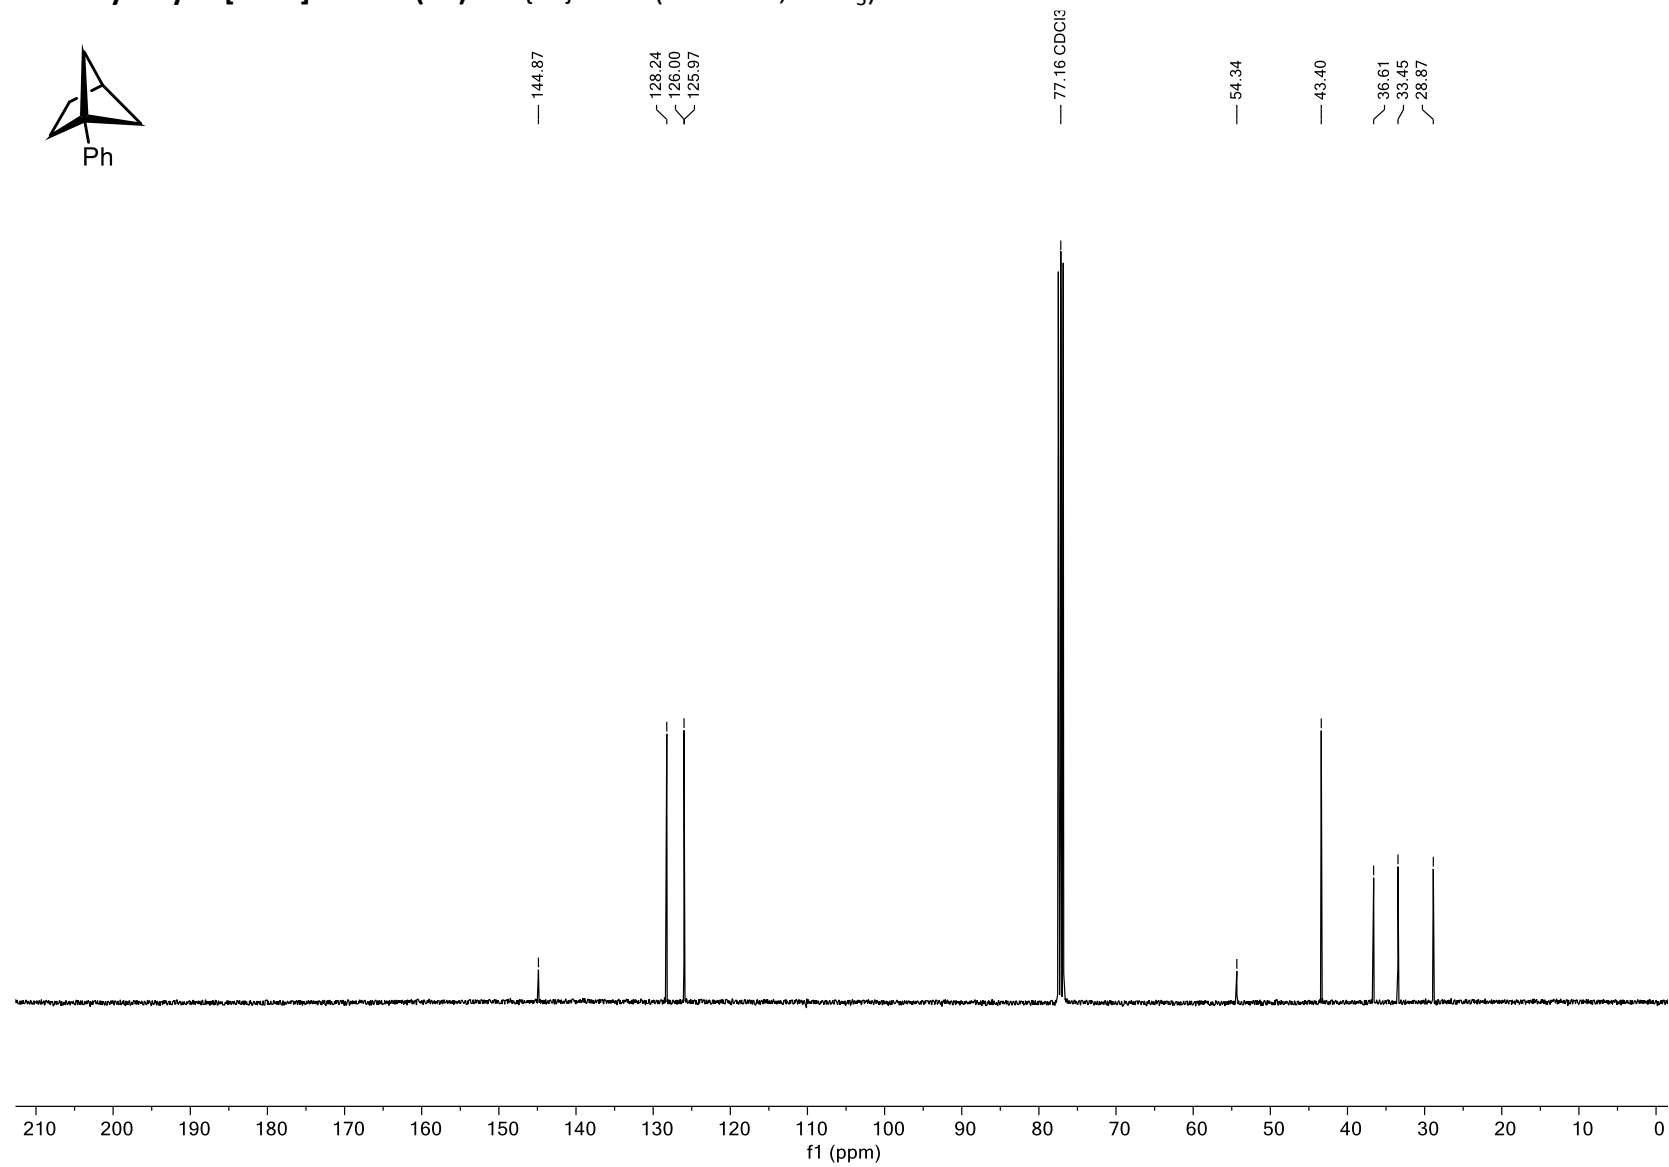

**1,4-Bis(4-(trifluoromethyl)phenyl)bicyclo[2.1.1]hexane (2c):**  $^1\text{H}$  NMR (300 MHz,  $\text{CDCl}_3$ )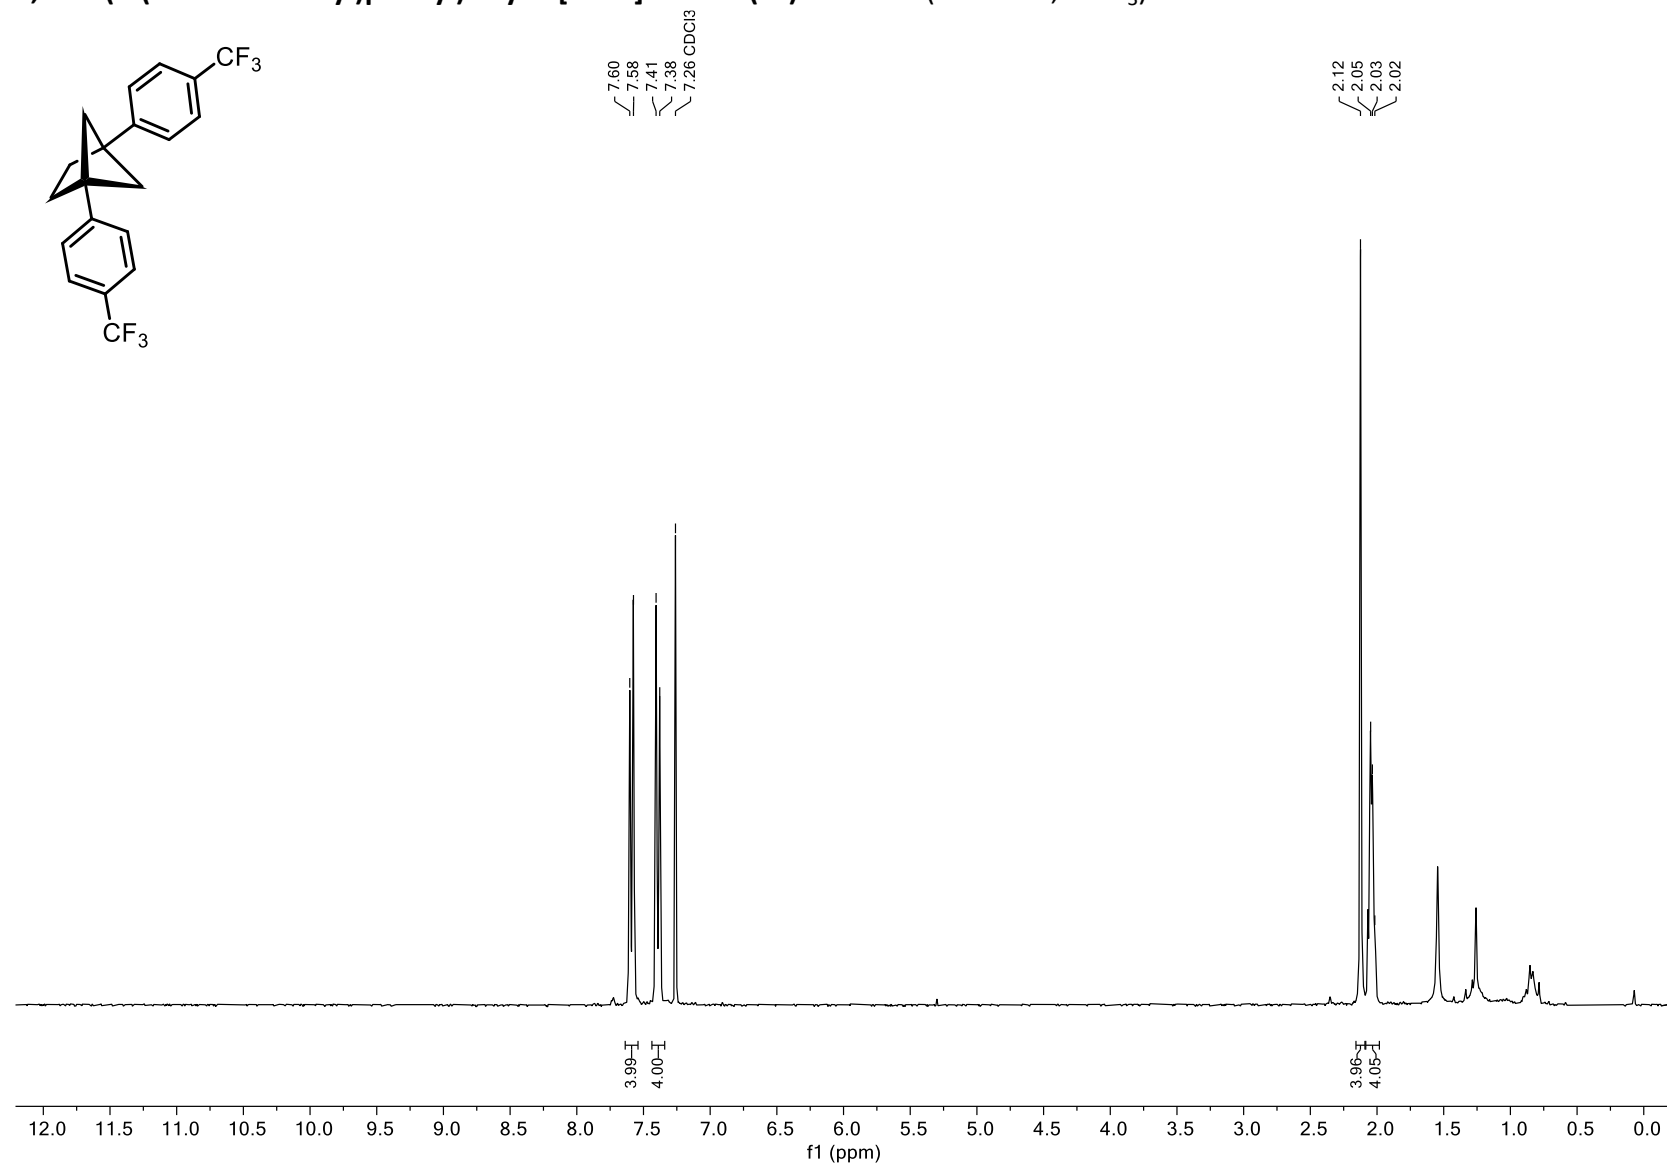

**1,4-Bis(4-(trifluoromethyl)phenyl)bicyclo[2.1.1]hexane (2c):**  $^{13}\text{C}\{^1\text{H}\}$  NMR (101 MHz,  $\text{CDCl}_3$ )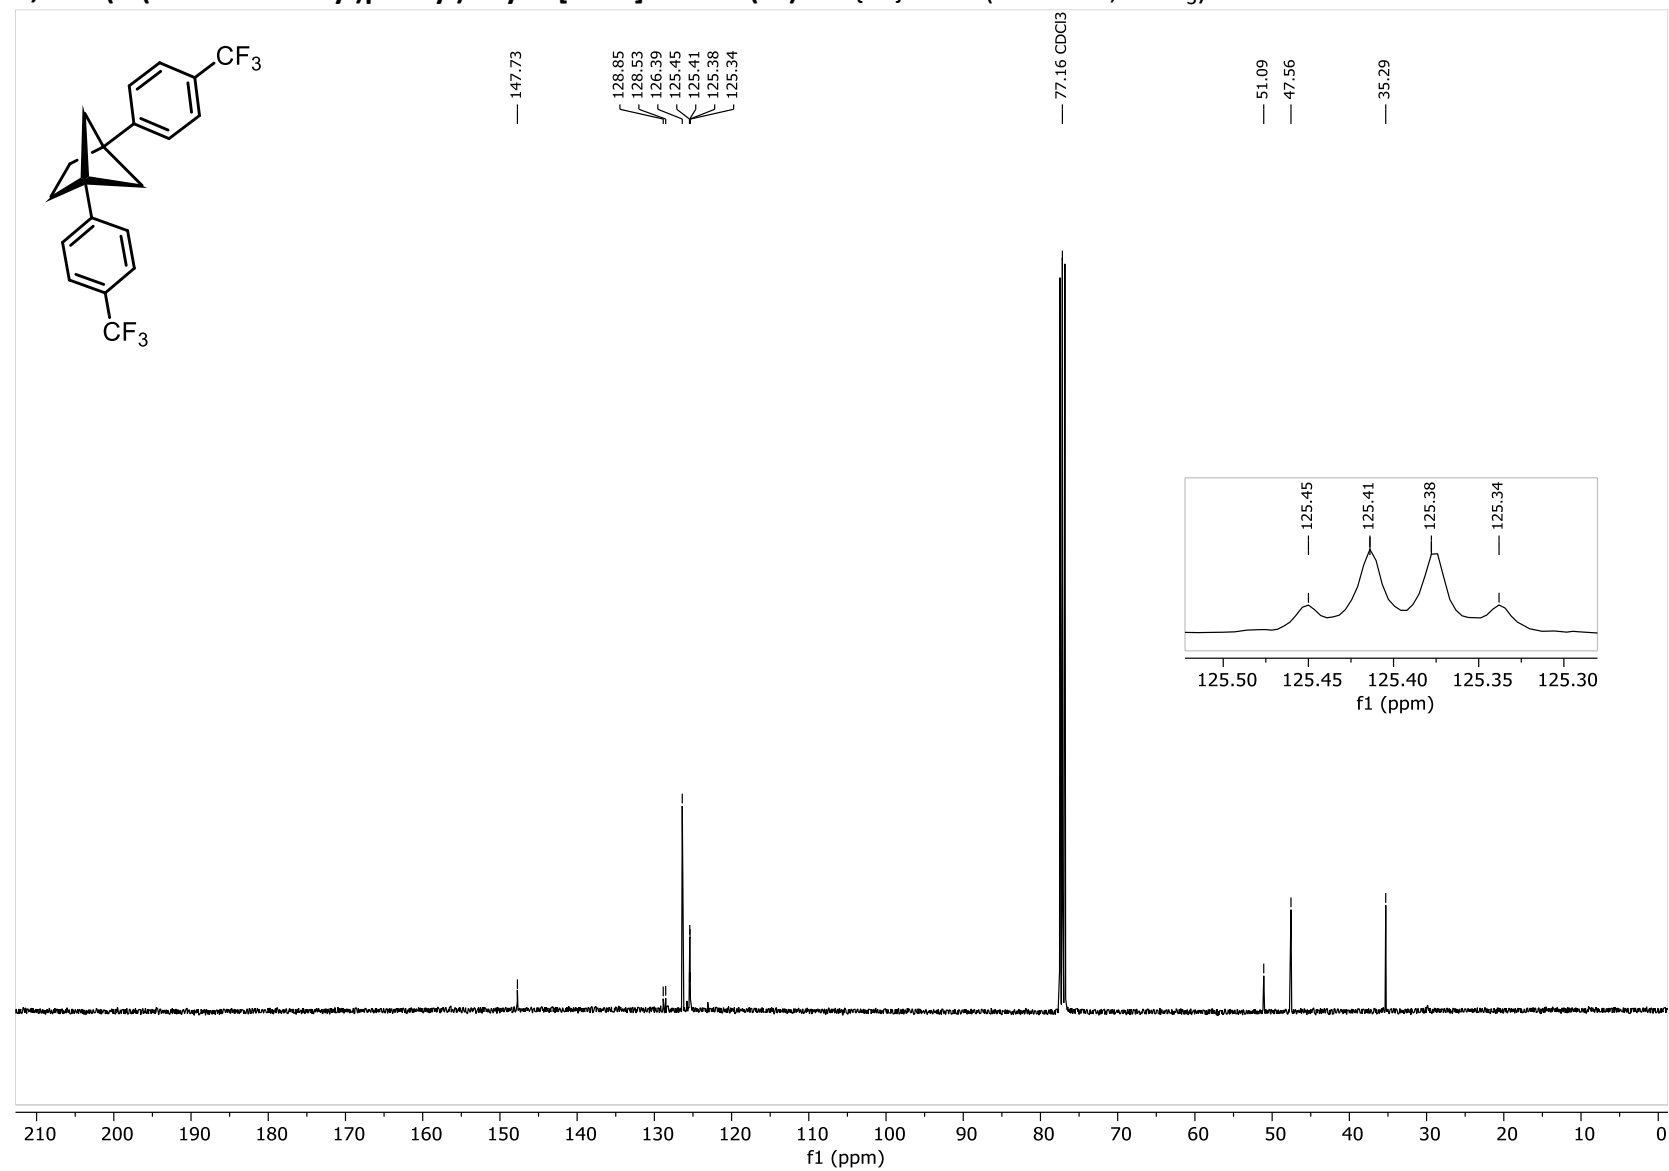

**1,4-Bis(4-(trifluoromethyl)phenyl)bicyclo[2.1.1]hexane (2c):**  $^{19}\text{F}\{^1\text{H}\}$  NMR (282 MHz,  $\text{CDCl}_3$ )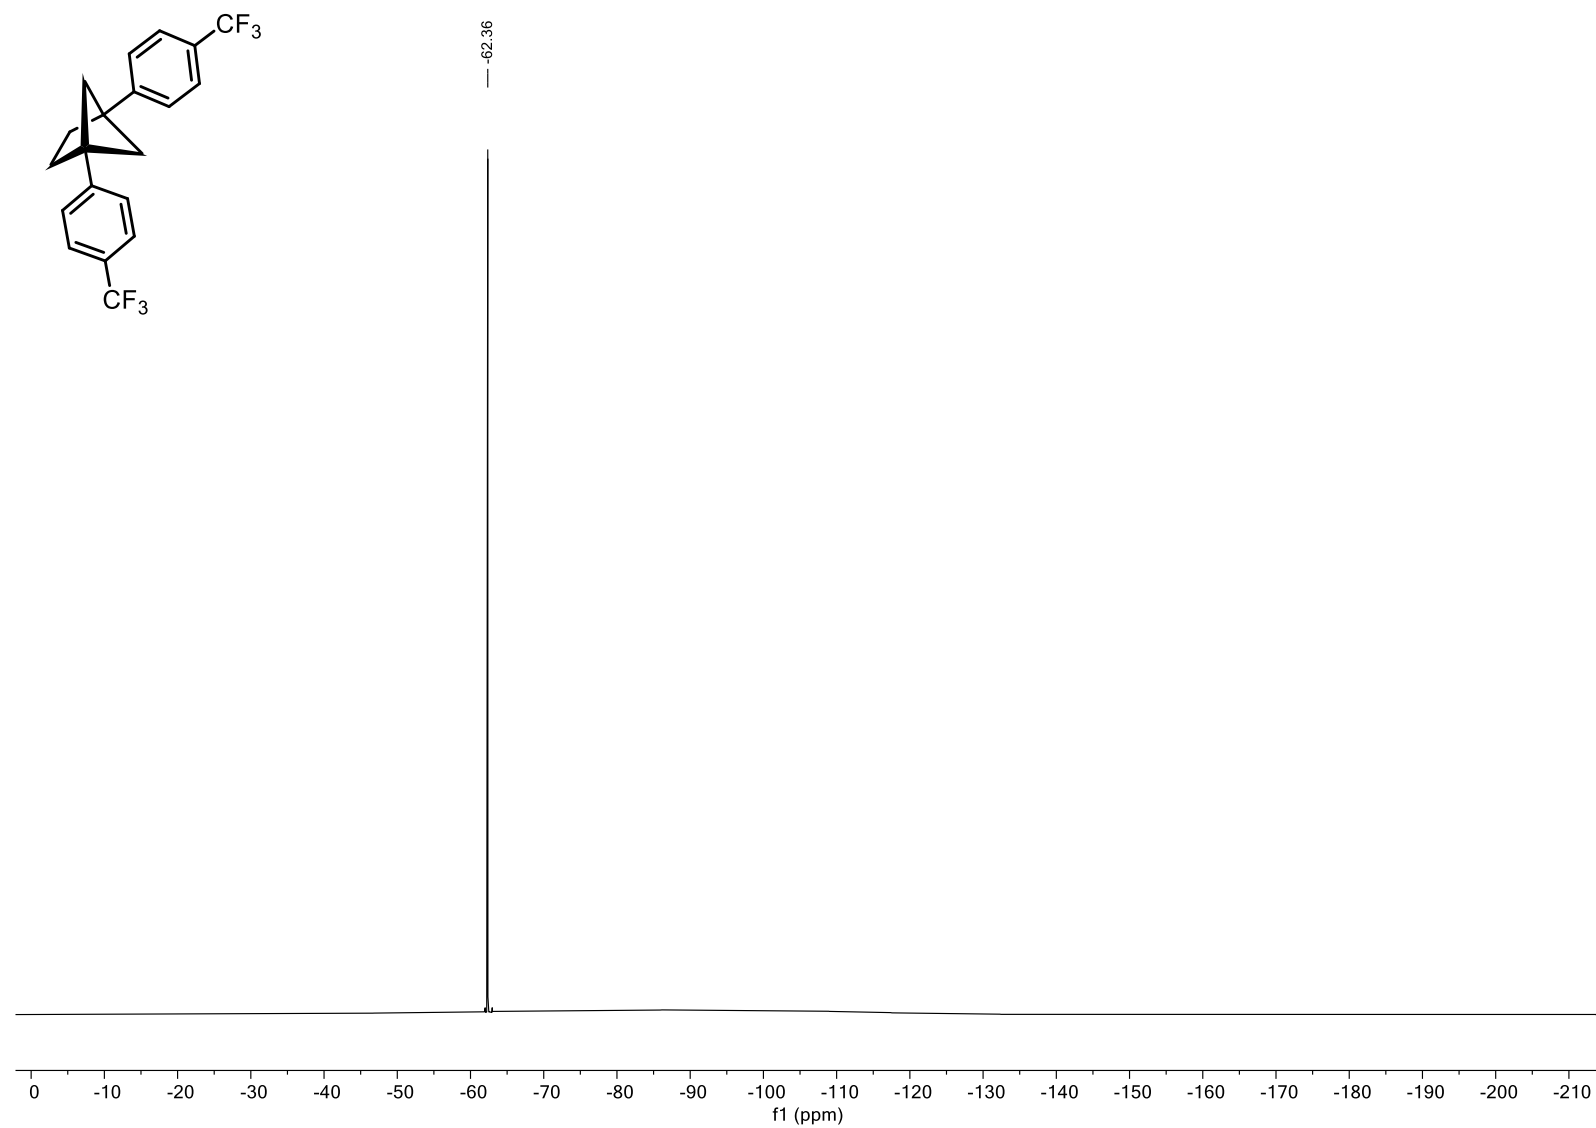

**4,4'-(Bicyclo[2.1.1]hexane-1,4-diyl)dibenzaldehyde (2d):**  $^1\text{H}$  NMR (300 MHz,  $\text{CDCl}_3$ )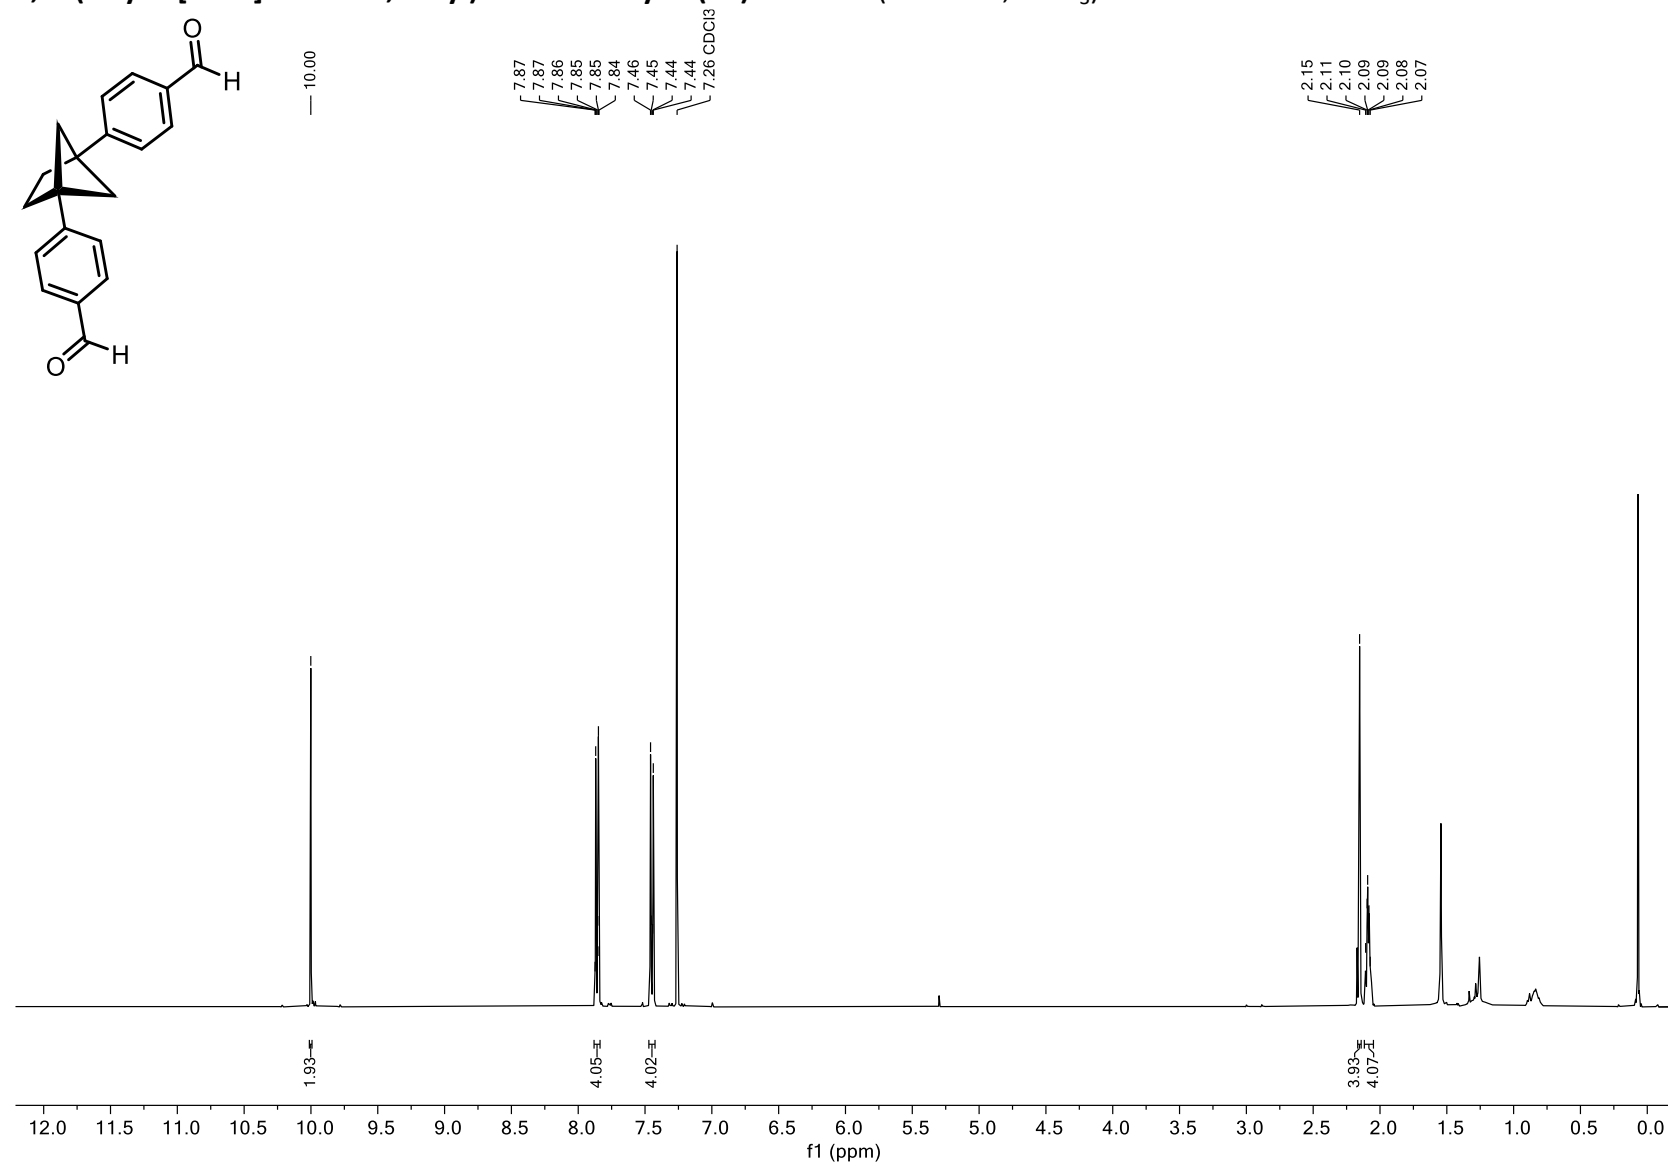

**4,4'-(Bicyclo[2.1.1]hexane-1,4-diyl)dibenzaldehyde (2d):**  $^{13}\text{C}\{^1\text{H}\}$  NMR (101 MHz,  $\text{CDCl}_3$ )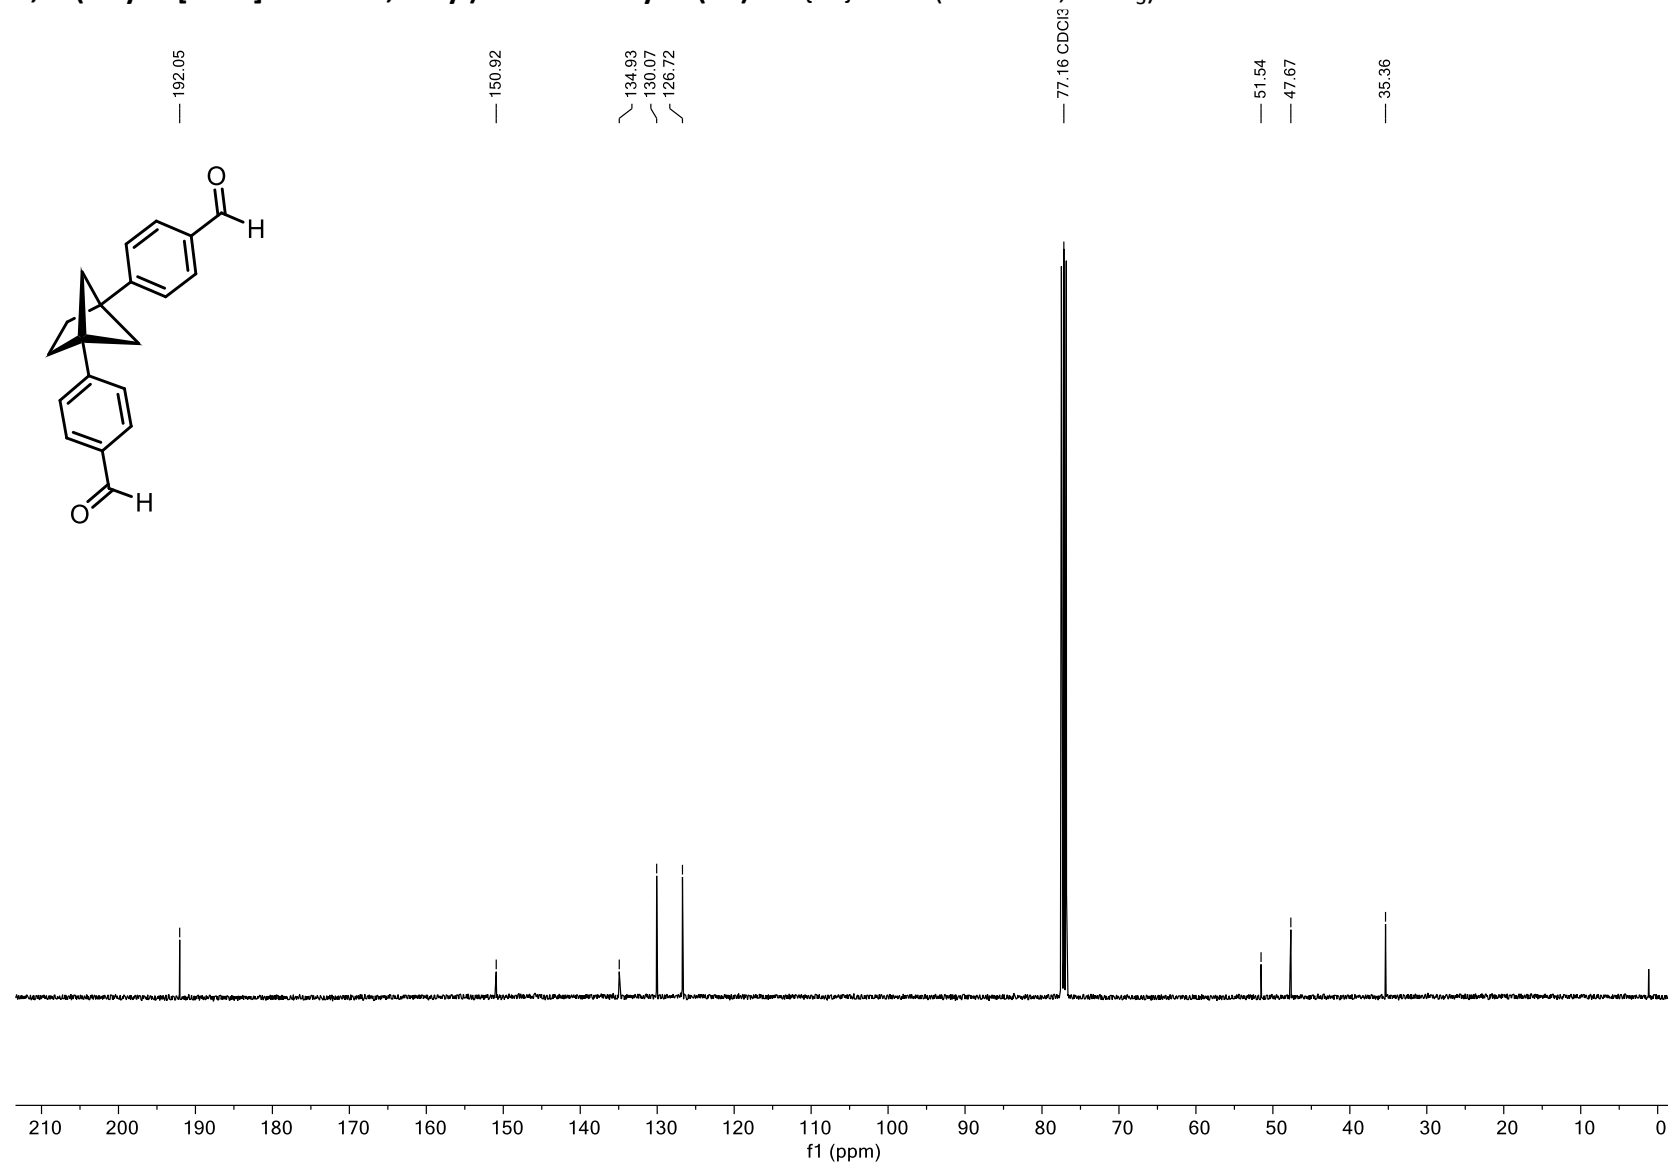



**1,4-Bis(4-(4,4,5,5-tetramethyl-1,3,2-dioxaborolan-2-yl)phenyl)bicyclo[2.1.1]hexane (2e):**  $^1\text{H}$  NMR (300 MHz,  $\text{CDCl}_3$ )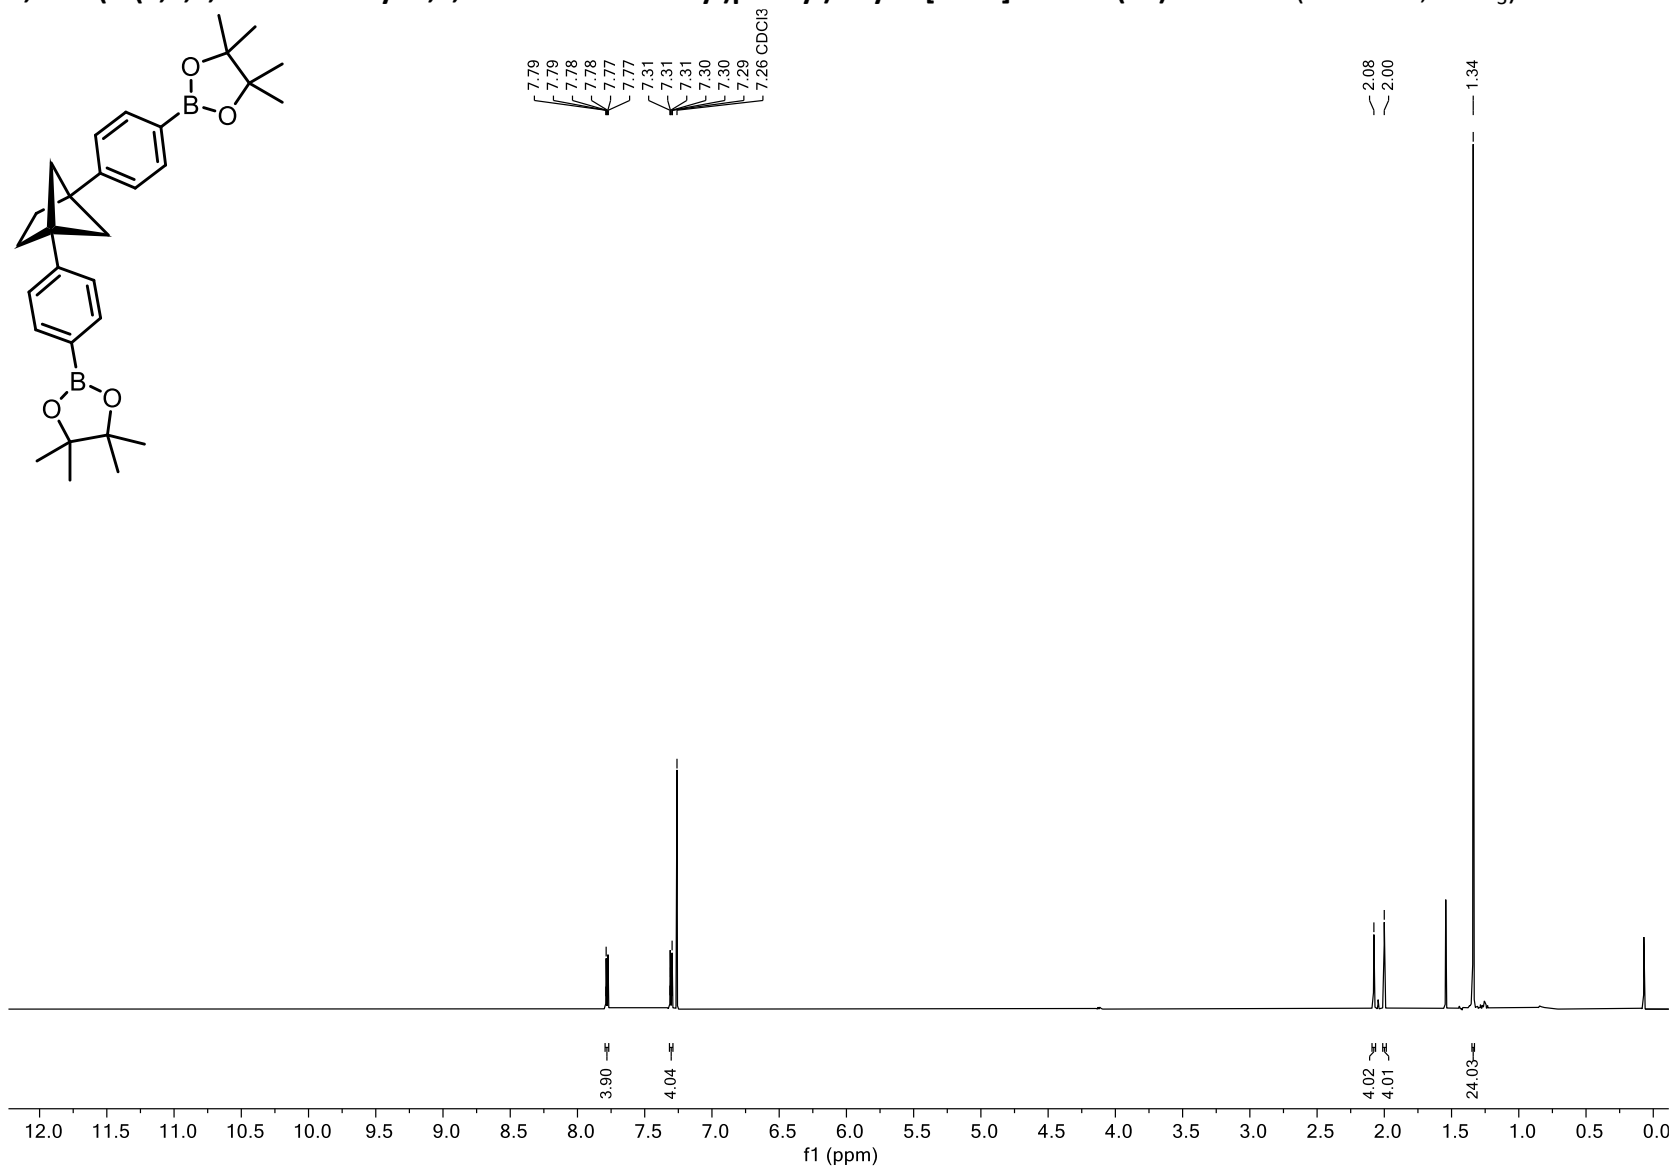

**1,4-Bis(4-(4,4,5,5-tetramethyl-1,3,2-dioxaborolan-2-yl)phenyl)bicyclo[2.1.1]hexane (2e):**  $^{13}\text{C}\{^1\text{H}\}$  NMR (101 MHz,  $\text{CDCl}_3$ )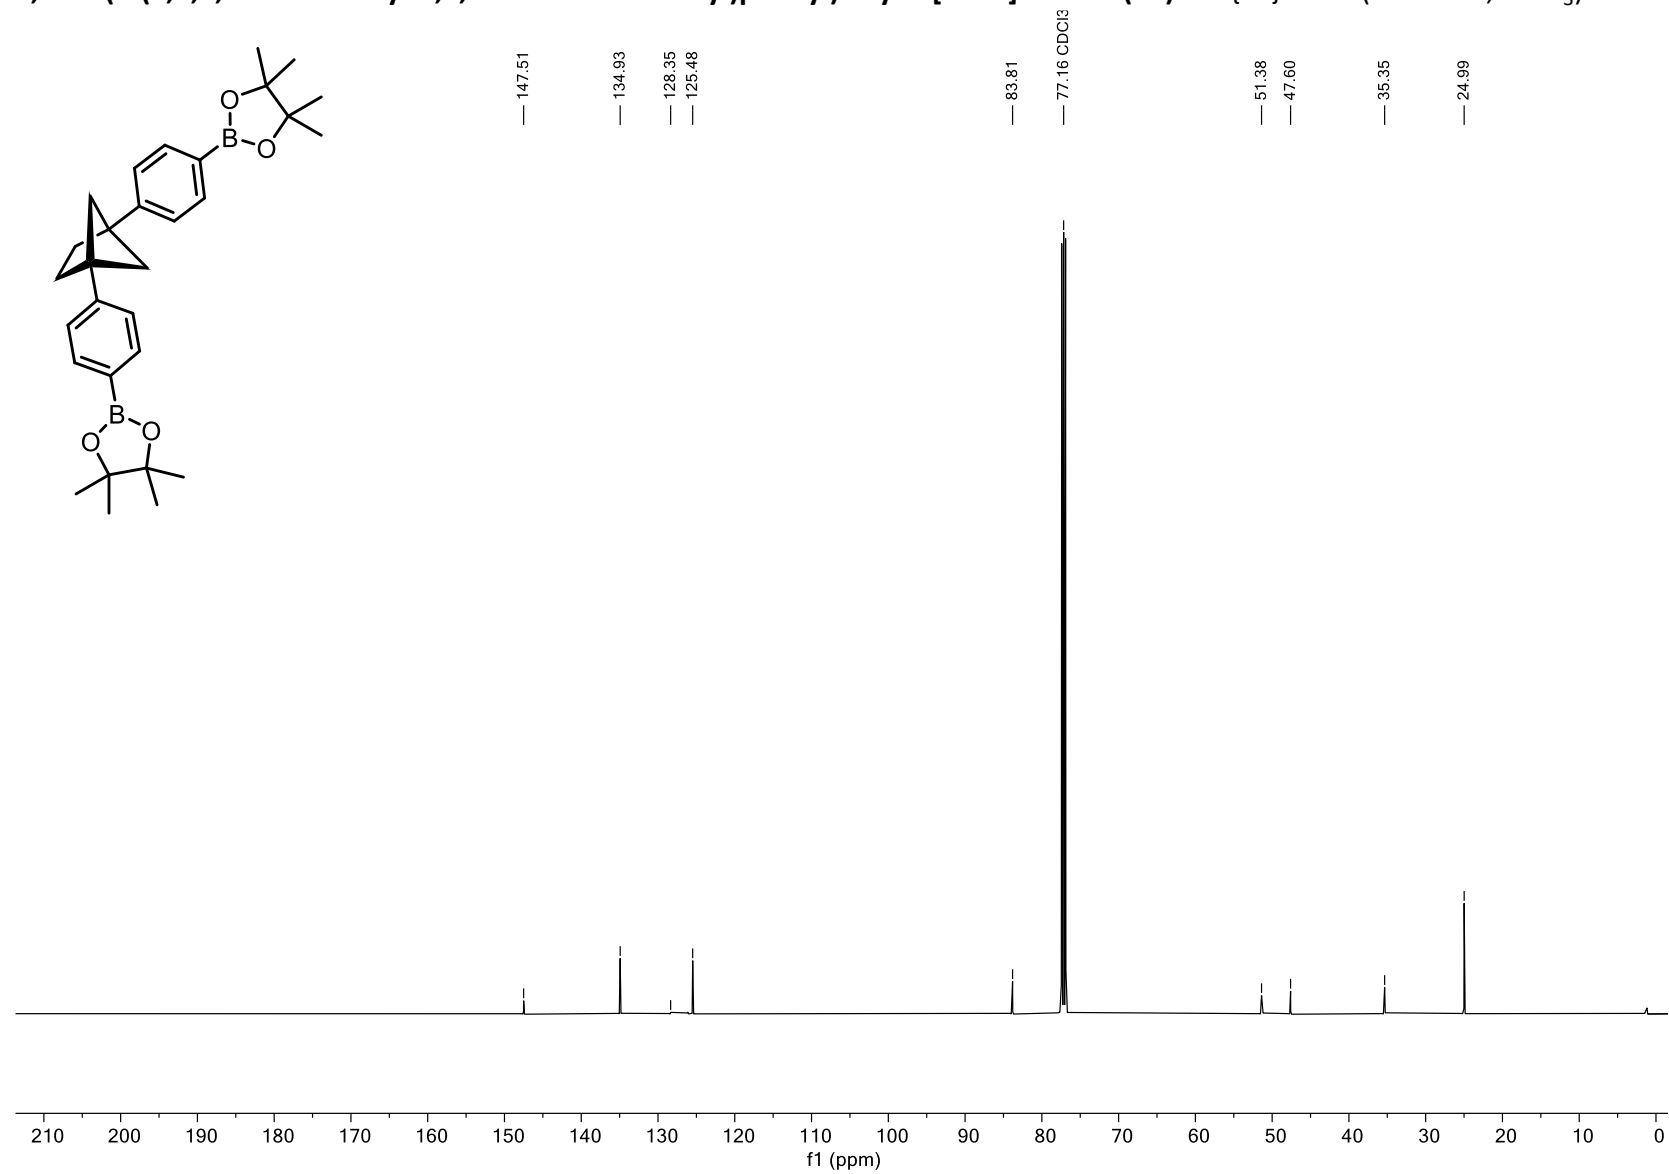

**1,4-Bis(4-(4,4,5,5-tetramethyl-1,3,2-dioxaborolan-2-yl)phenyl)bicyclo[2.1.1]hexane (2e):**  $^{11}\text{B}$  NMR (161 MHz,  $\text{CDCl}_3$ )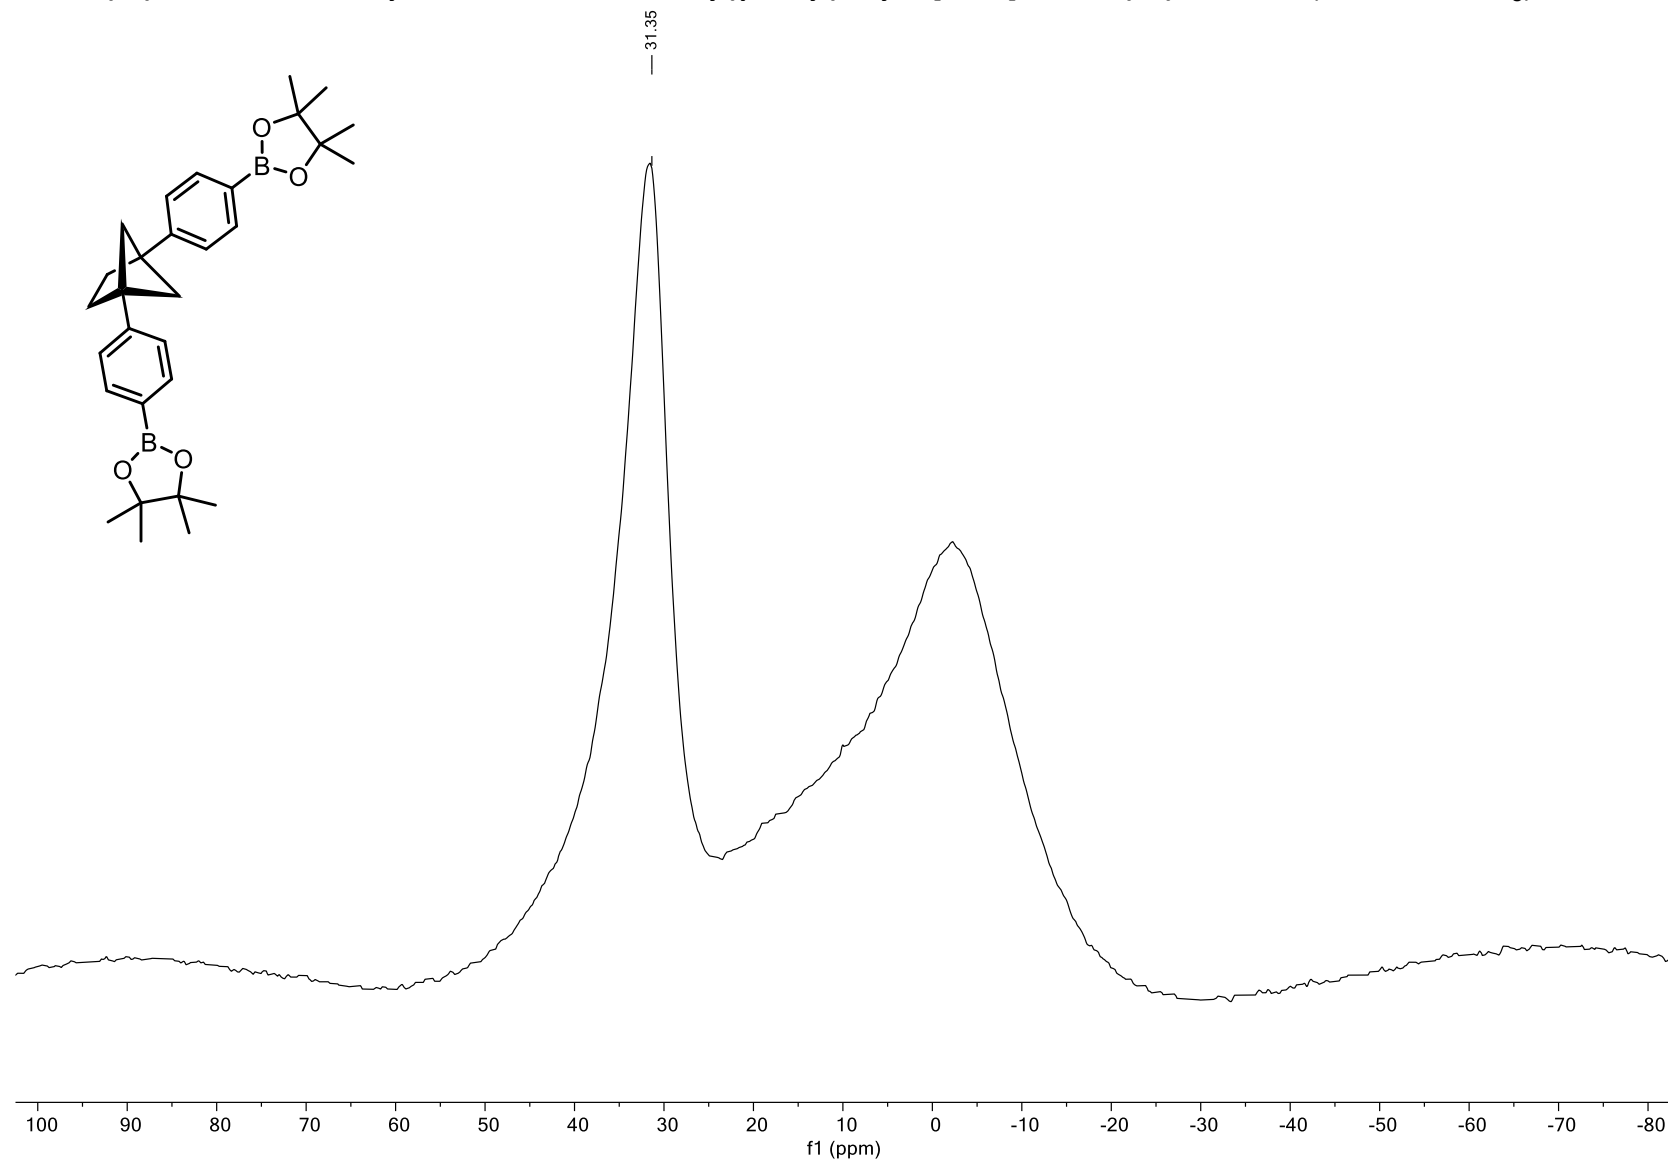

**1,4-Bis(4-bromophenyl)bicyclo[2.1.1]hexane (2f):**  $^1\text{H}$  NMR (300 MHz,  $\text{CDCl}_3$ )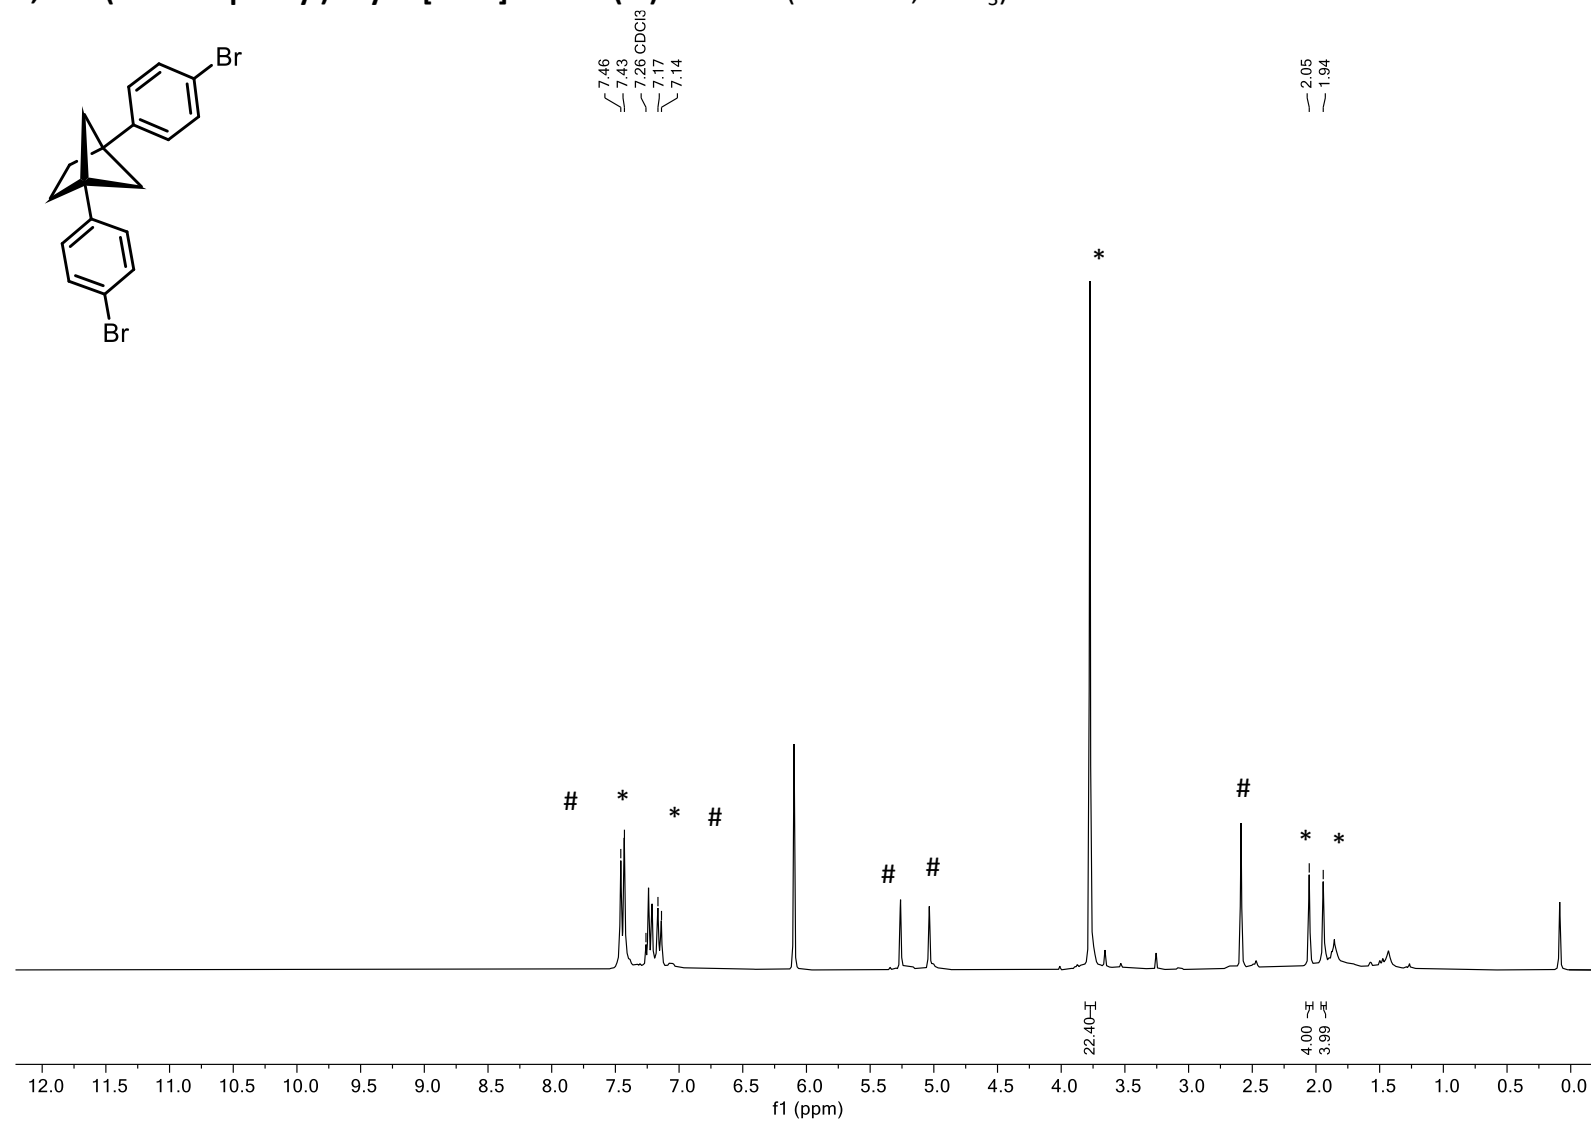# = diene **1m**, \* = BCH **2m**

**1,4-Bis(4-bromophenyl)bicyclo[2.1.1]hexane (2f):**  $^{13}\text{C}\{^1\text{H}\}$  NMR (101 MHz,  $\text{CDCl}_3$ )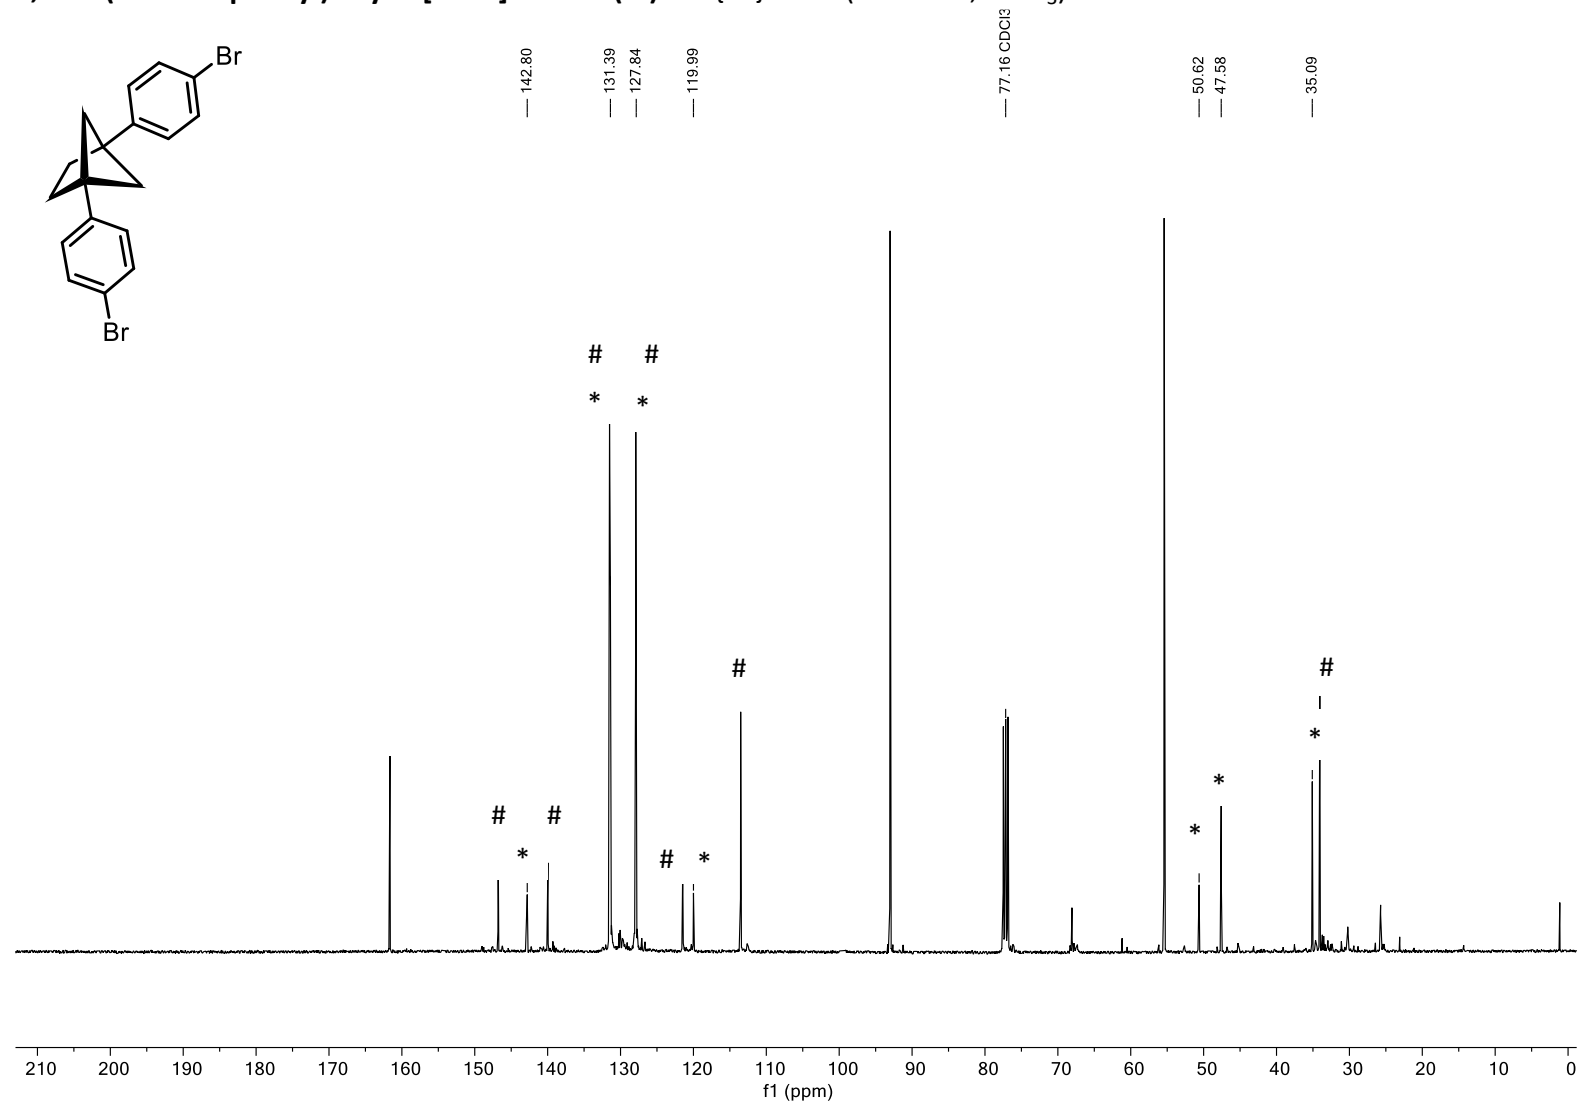# = diene **1f**, \* = BCH **2f**

**1,4-Bis(4-(trimethylsilyl)phenyl)bicyclo[2.1.1]hexane (2g):**  $^1\text{H}$  NMR (300 MHz,  $\text{CDCl}_3$ )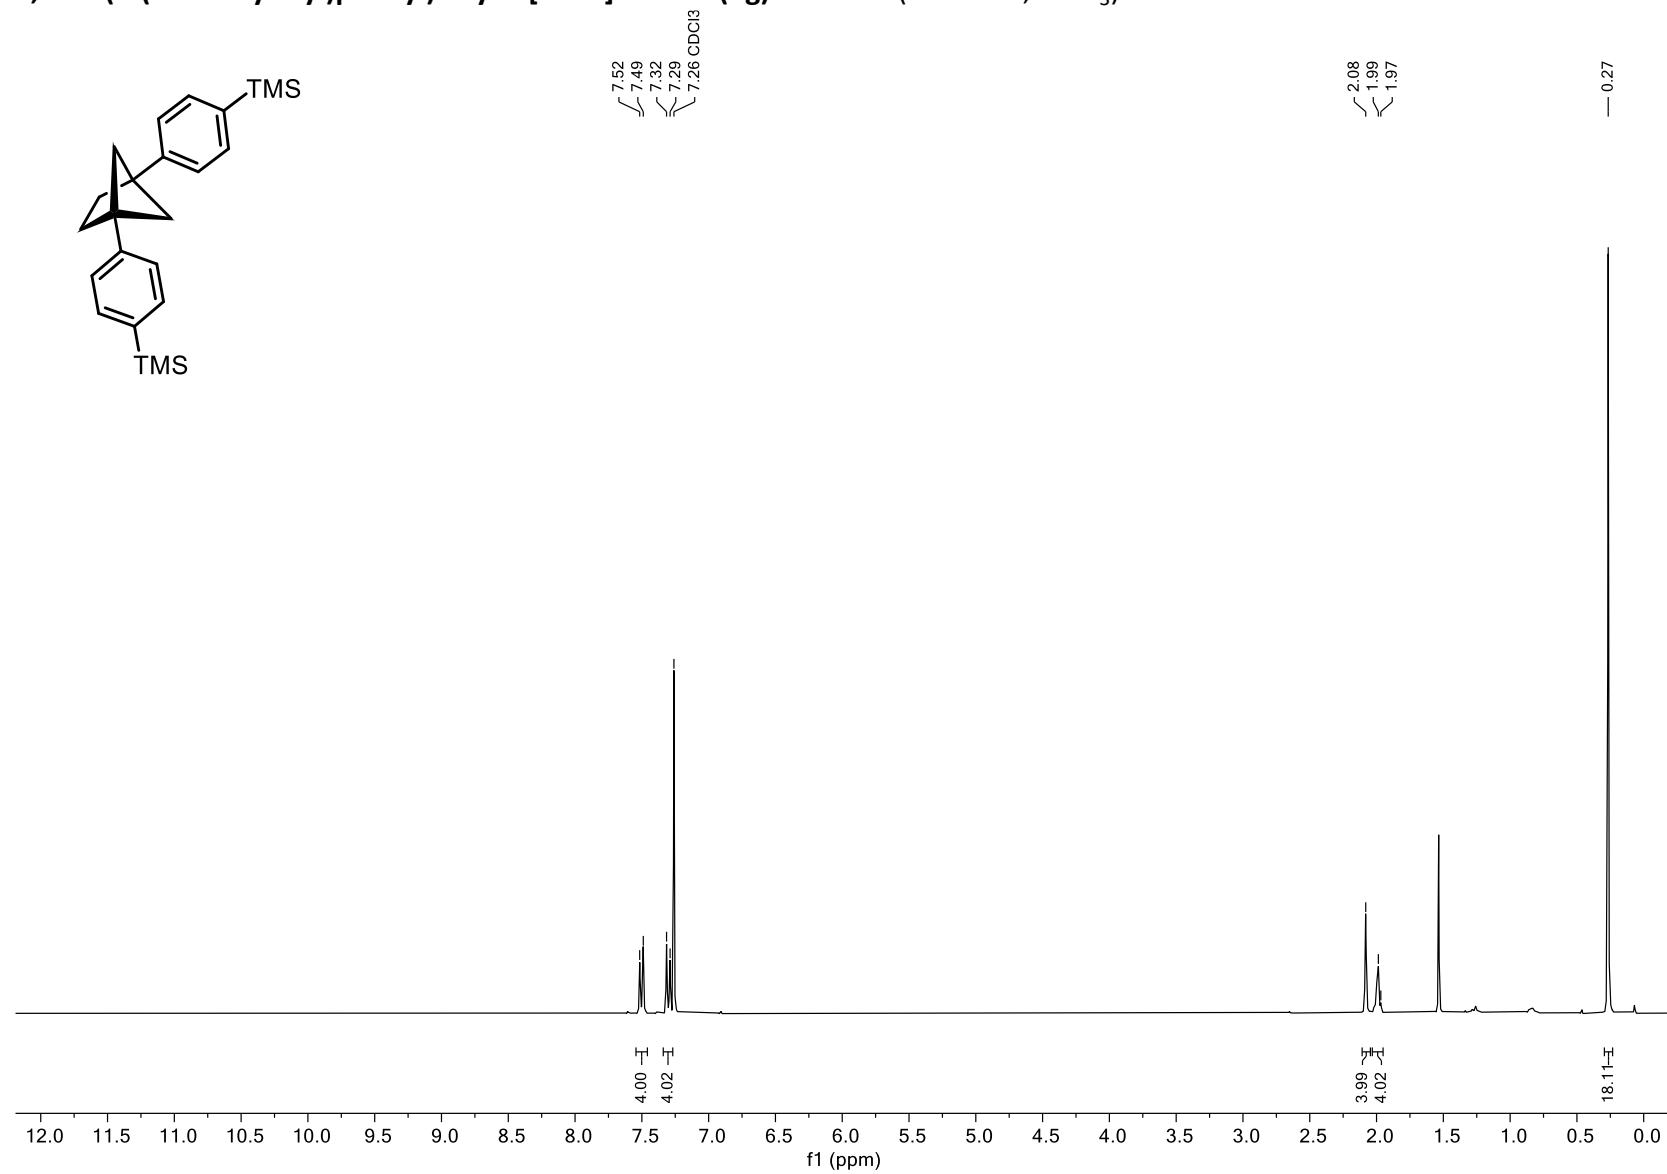

**1,4-Bis(4-(trimethylsilyl)phenyl)bicyclo[2.1.1]hexane (2g):**  $^{13}\text{C}\{^1\text{H}\}$  NMR (101 MHz,  $\text{CDCl}_3$ )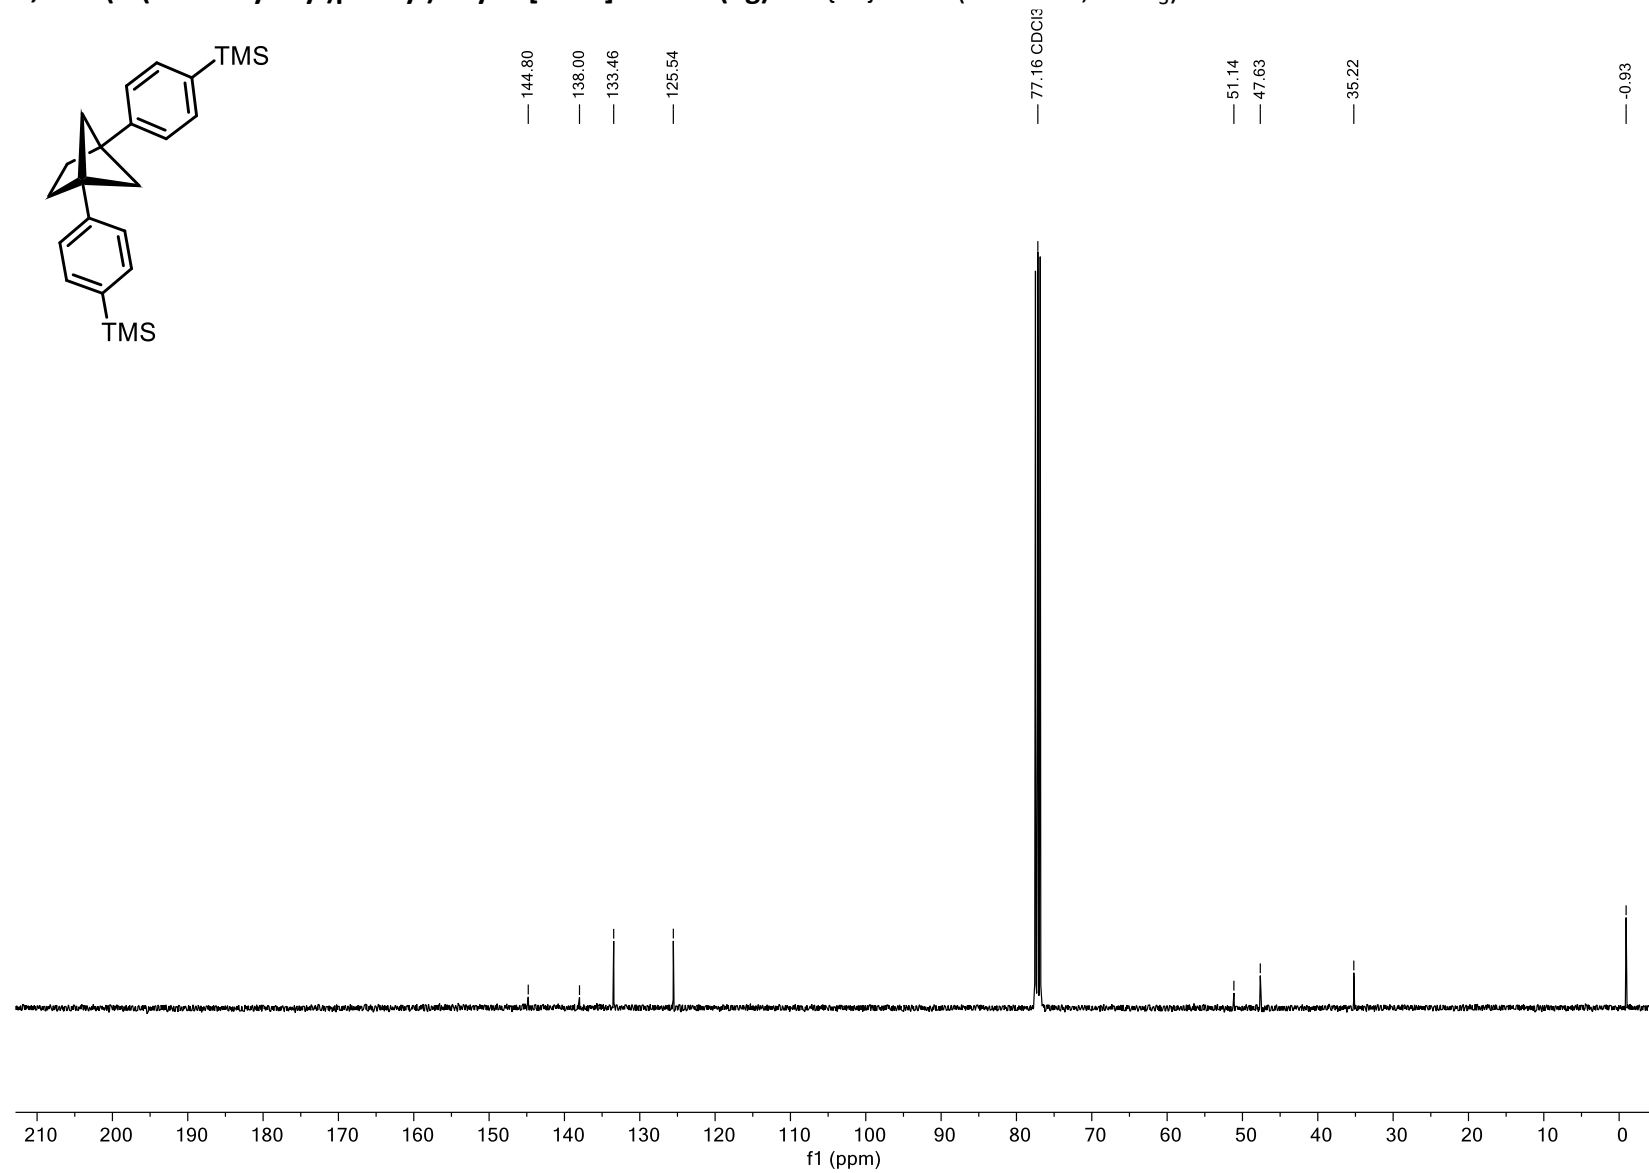

**1,4-Bis(4-(trimethylsilyl)phenyl)bicyclo[2.1.1]hexane (2g):** INEPT  $^{29}\text{Si}\{^1\text{H}\}$  NMR (99 MHz,  $\text{CDCl}_3$ )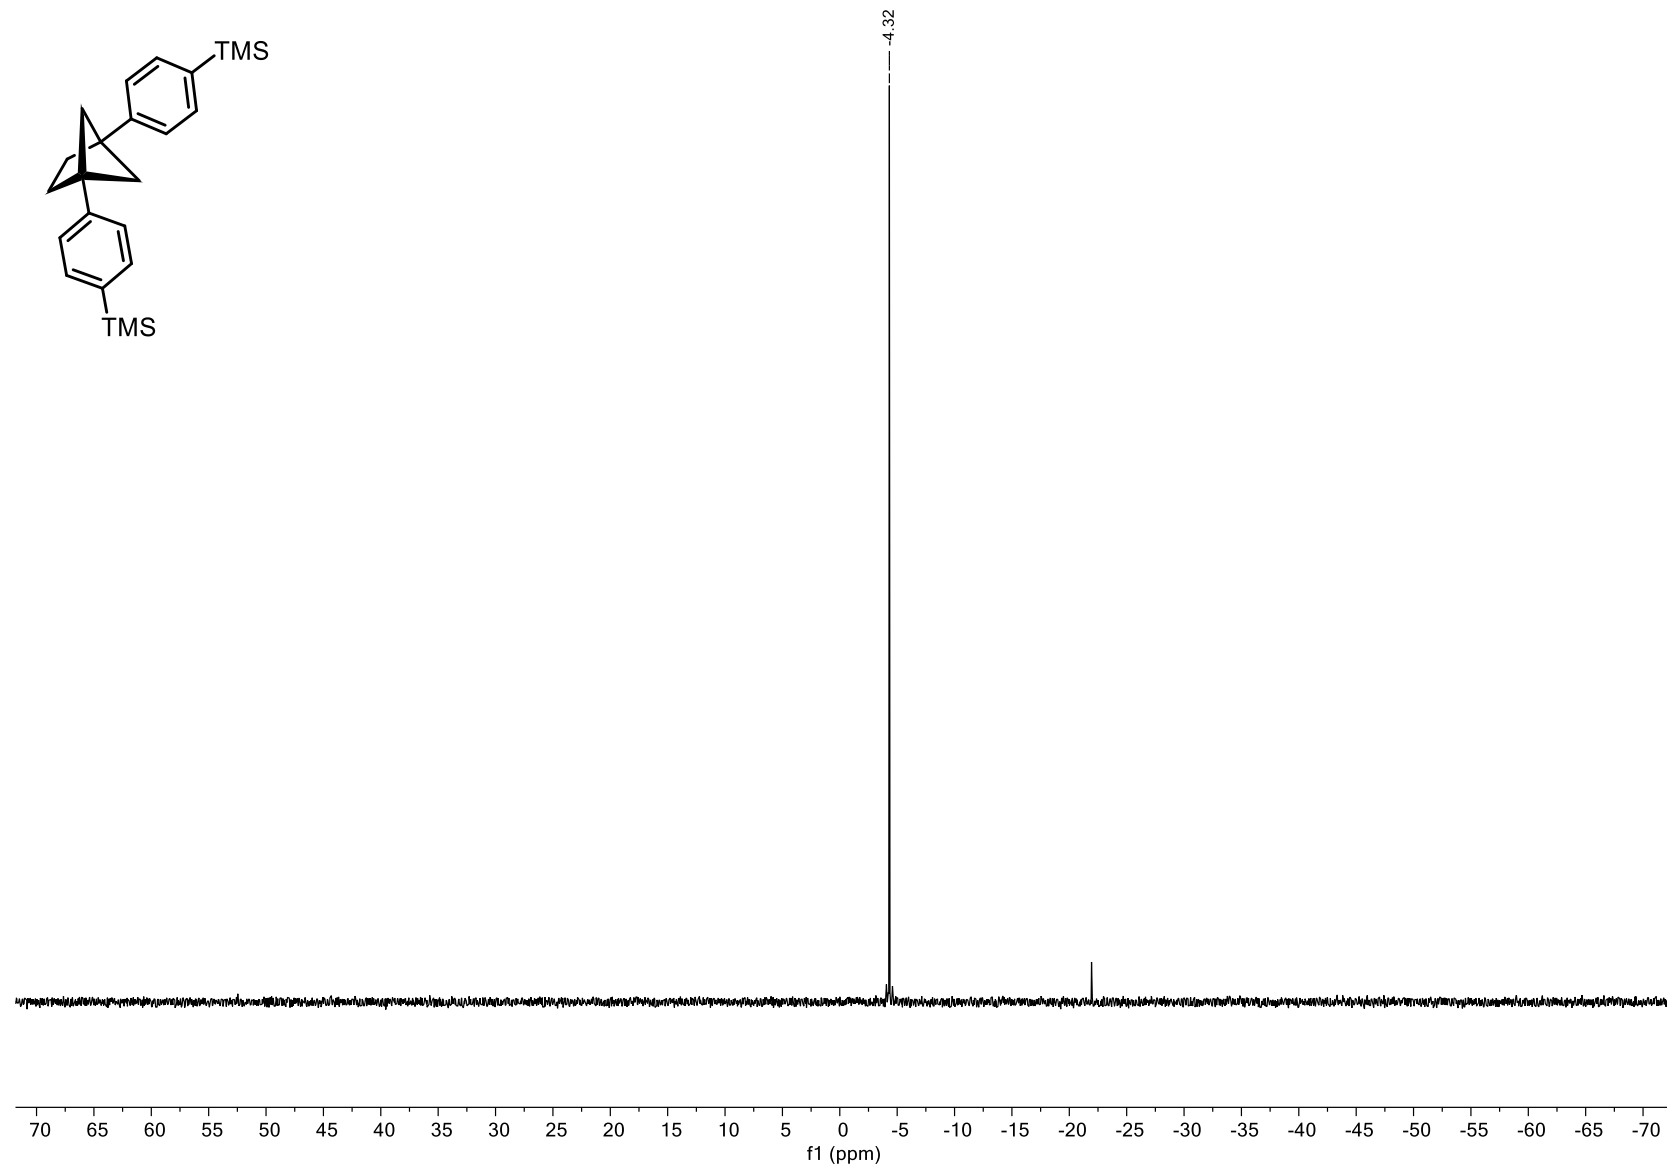



**2,2'-((Bicyclo[2.1.1]hexane-1,4-diyl)bis(4,1-phenylene))bis(propan-2-ol) (2h):  $^1\text{H}$  NMR (300 MHz,  $\text{CDCl}_3$ )**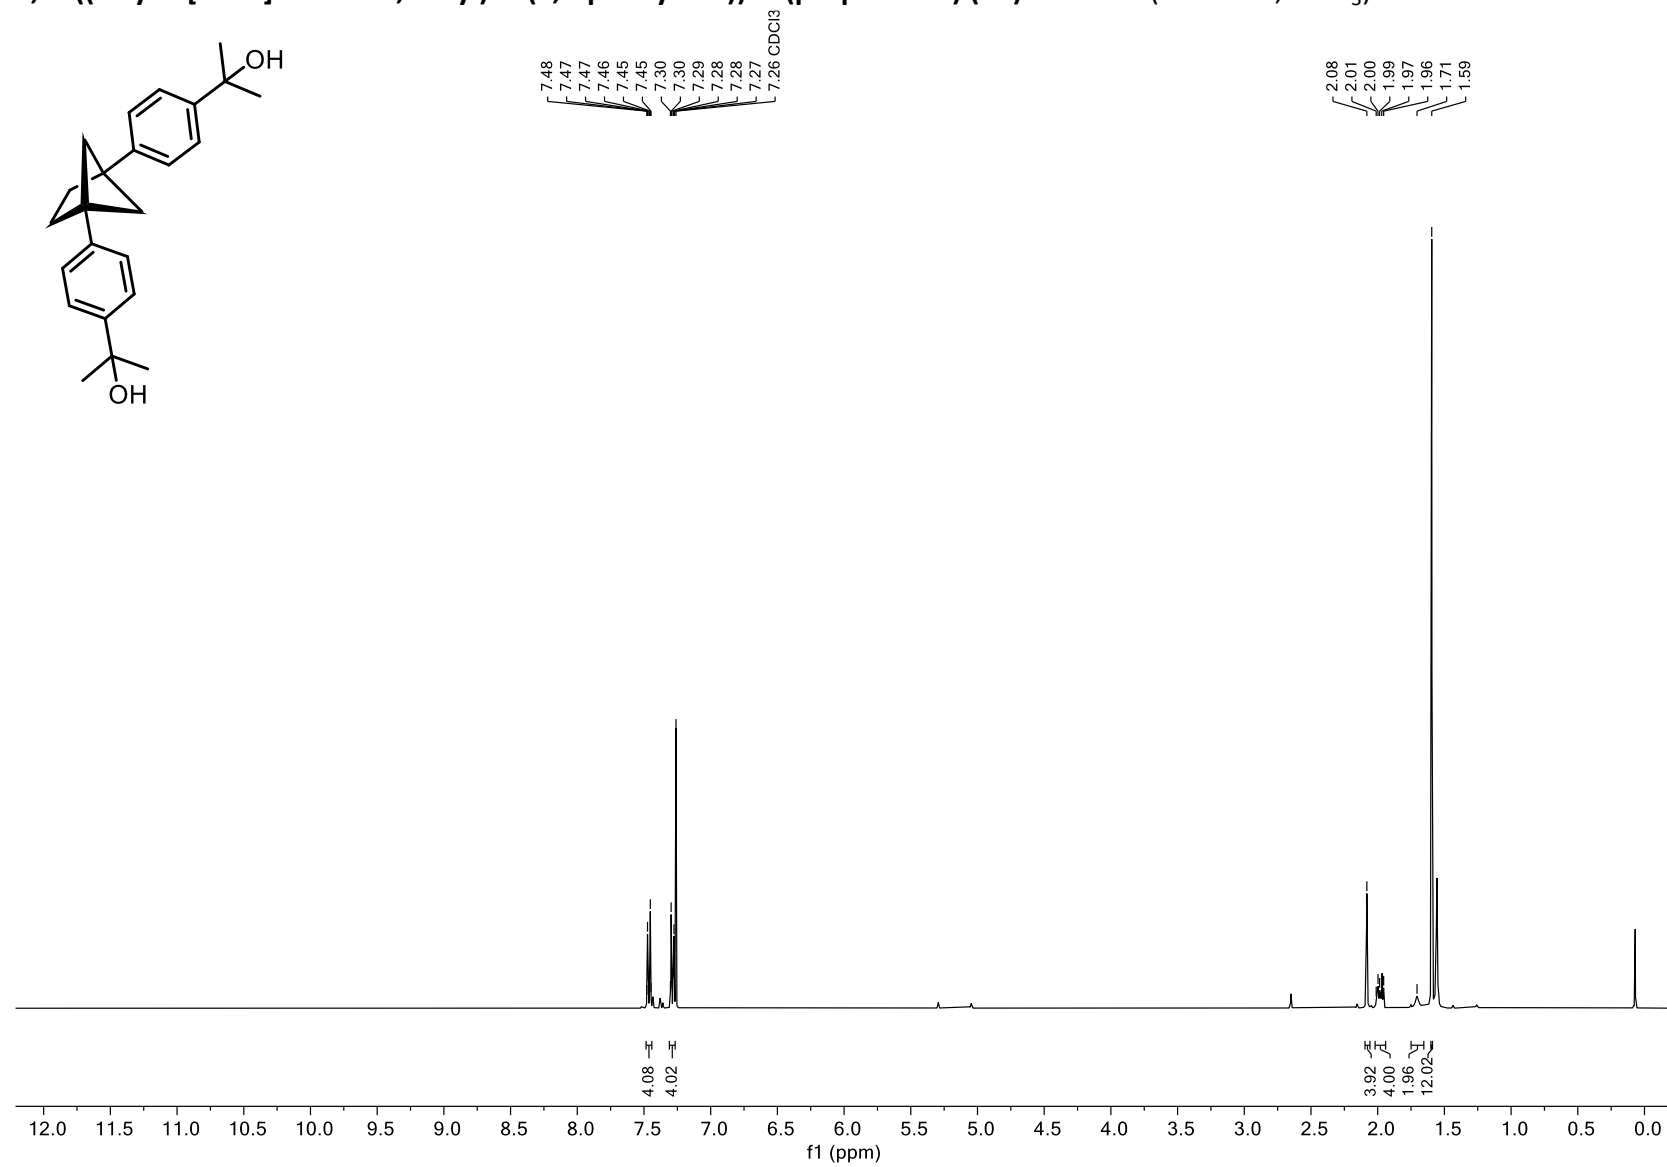

**2,2'-((Bicyclo[2.1.1]hexane-1,4-diyl)bis(4,1-phenylene))bis(propan-2-ol) (2h):**  $^{13}\text{C}\{^1\text{H}\}$  NMR (101 MHz,  $\text{CDCl}_3$ )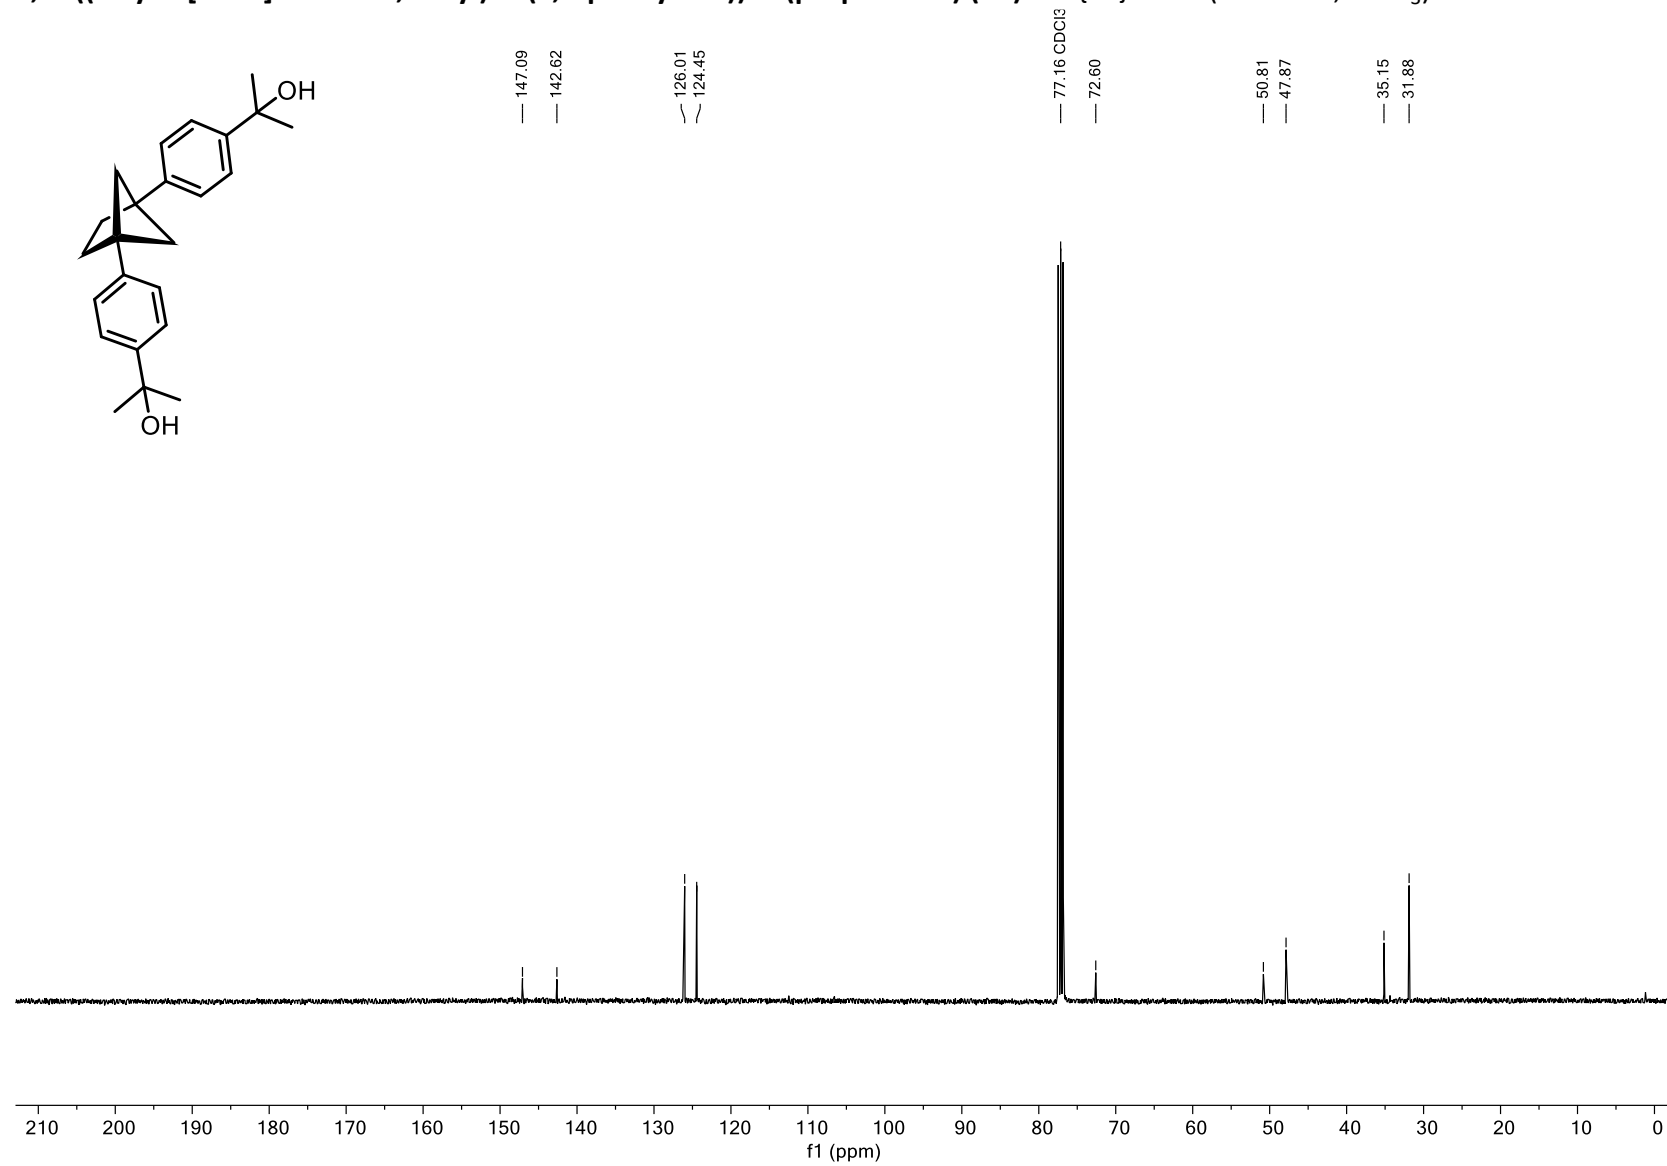

**1,4-Di-*p*-tolylbicyclo[2.1.1]hexane (2i):**  $^1\text{H}$  NMR (300 MHz,  $\text{CDCl}_3$ )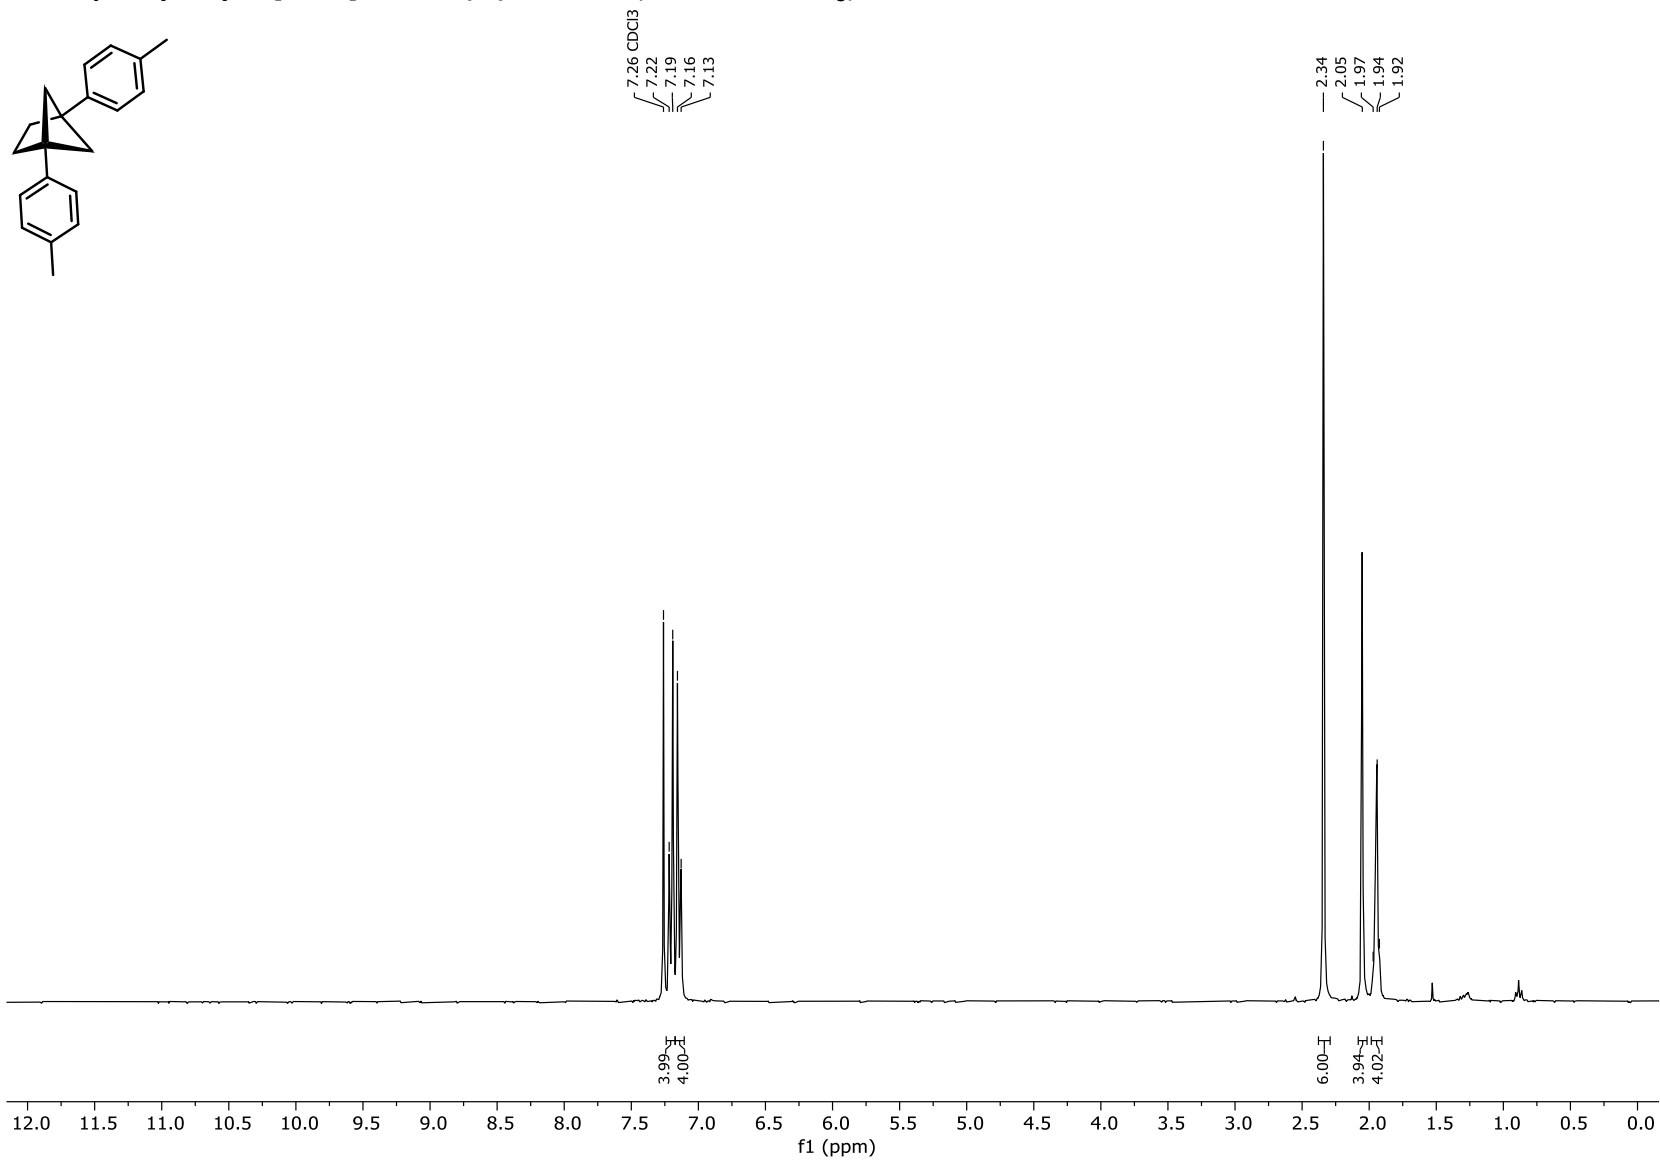

**1,4-Di-*p*-tolylbicyclo[2.1.1]hexane (2i):**  $^{13}\text{C}\{^1\text{H}\}$  NMR (101 MHz,  $\text{CDCl}_3$ )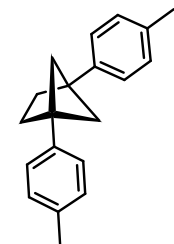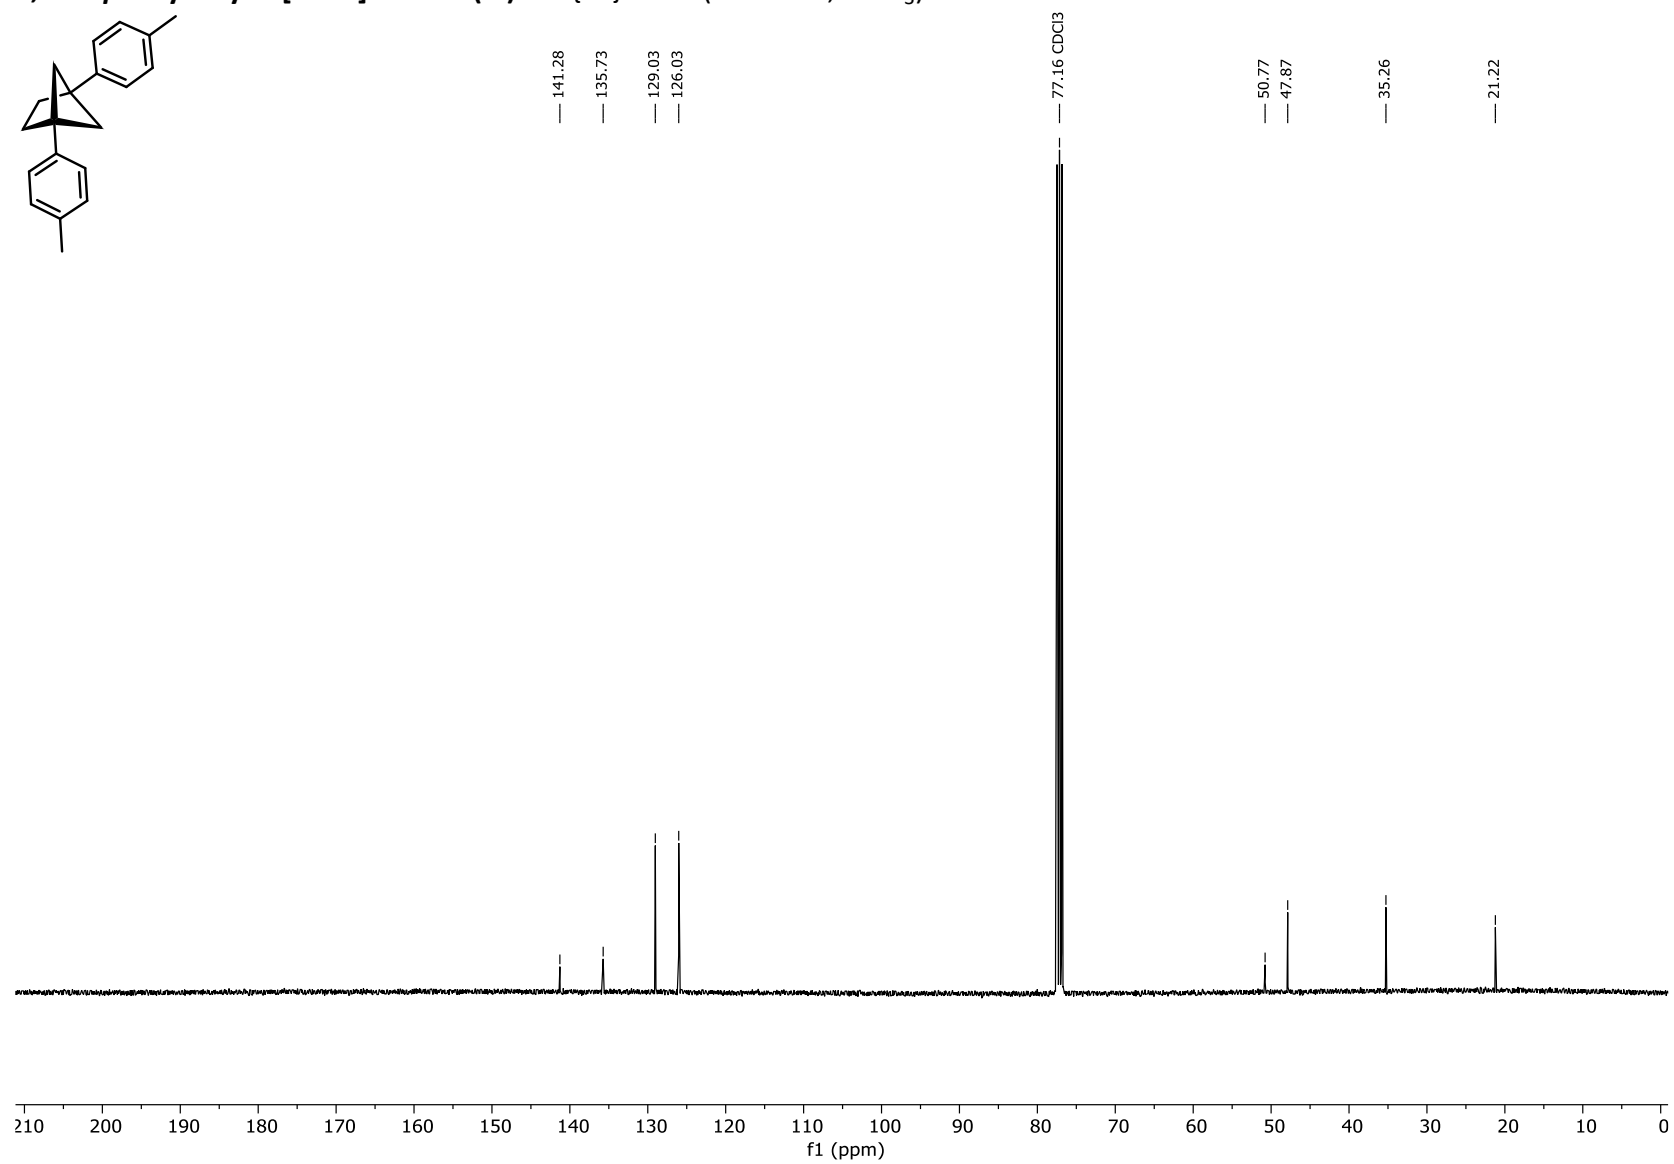

**1,4-Di-*m*-tolylbicyclo[2.1.1]hexane (2j):**  $^1\text{H}$  NMR (300 MHz,  $\text{CDCl}_3$ )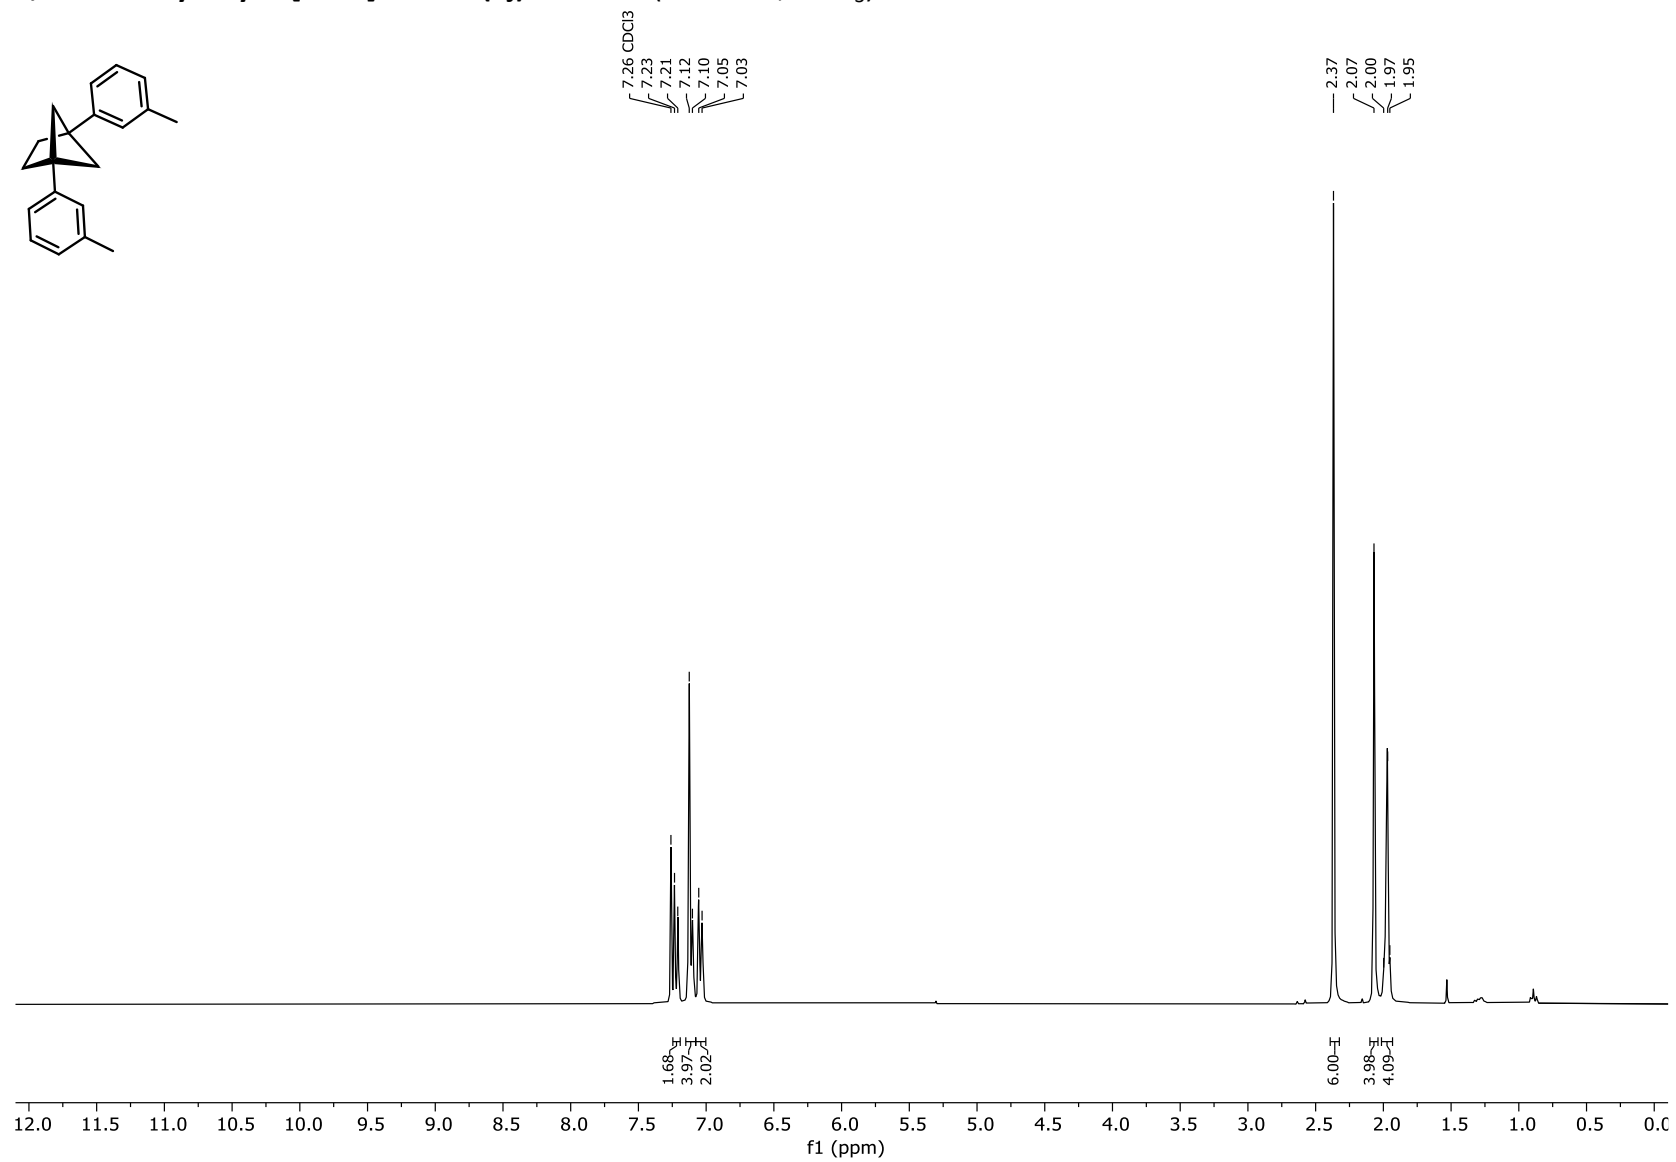

**1,4-Di-*m*-tolylbicyclo[2.1.1]hexane (2j):**  $^{13}\text{C}\{^1\text{H}\}$  NMR (101 MHz,  $\text{CDCl}_3$ )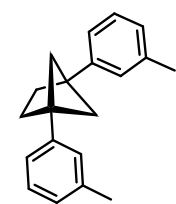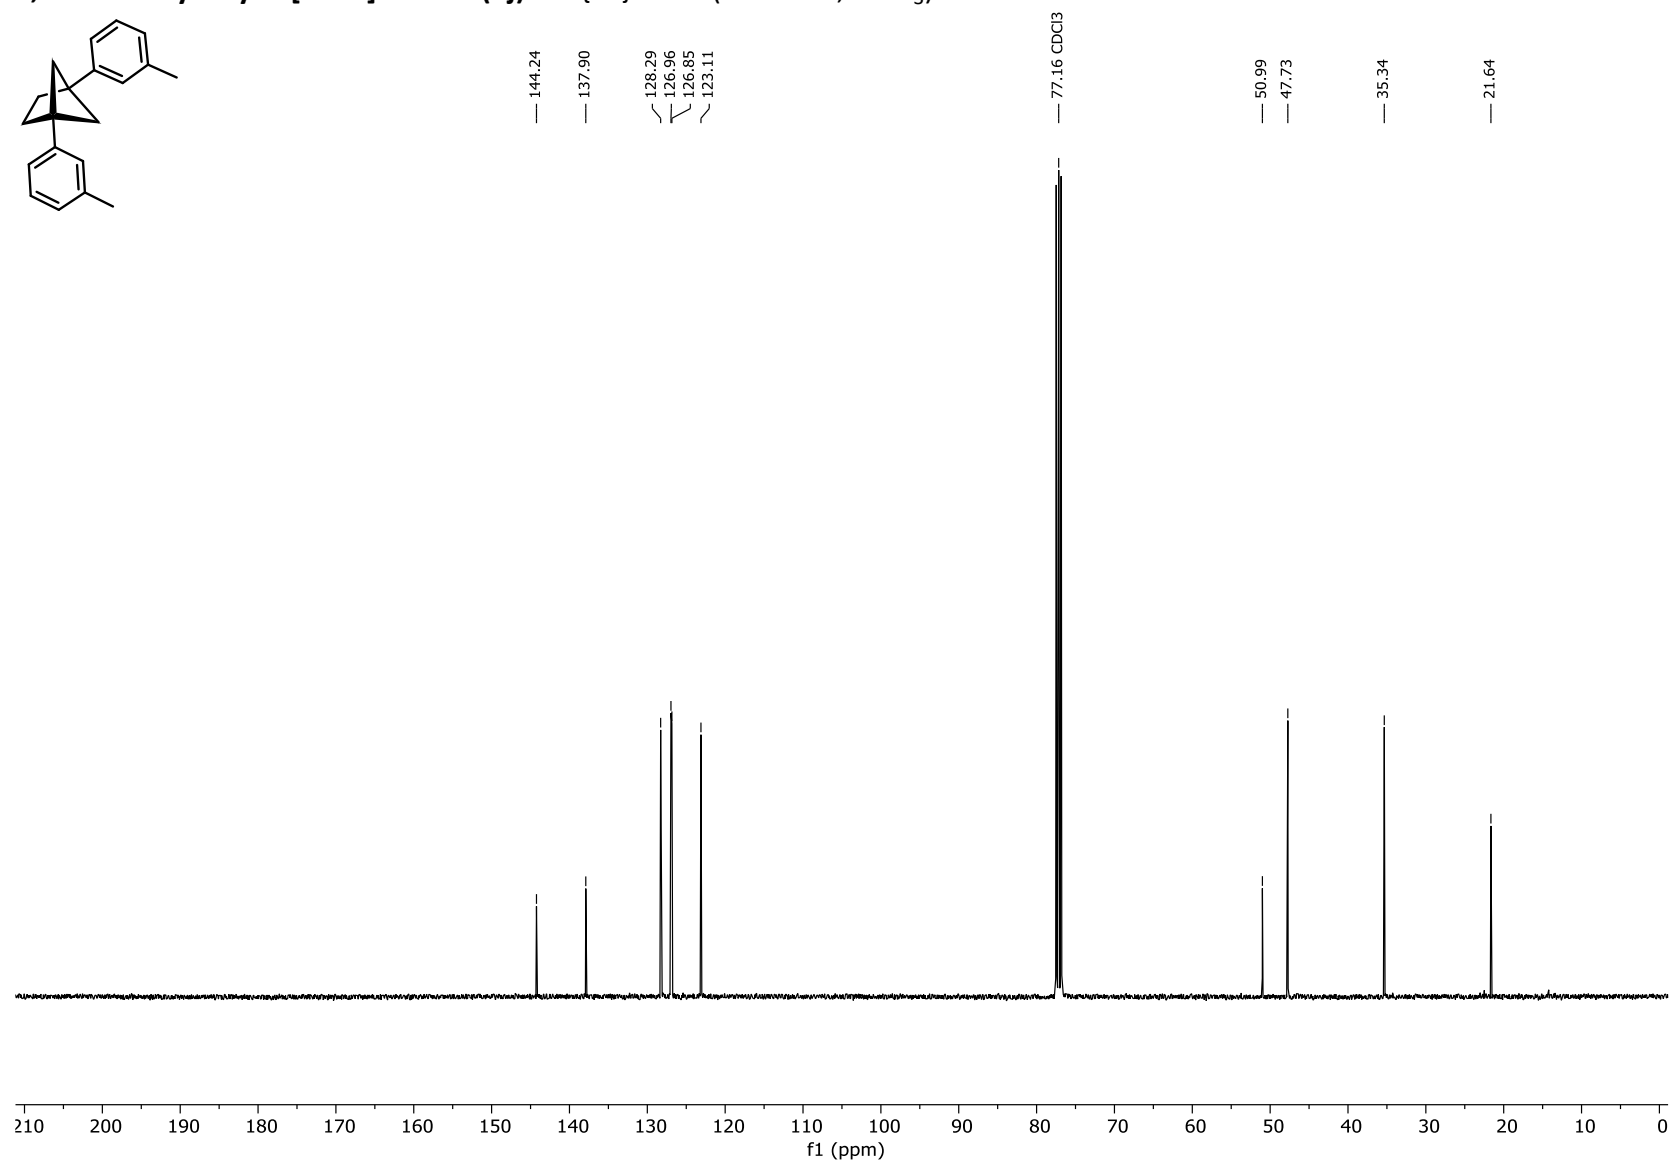

**1,4-Bis(4-methoxyphenyl)bicyclo[2.1.1]hexane (2I):**  $^1\text{H}$  NMR (300 MHz,  $\text{CDCl}_3$ )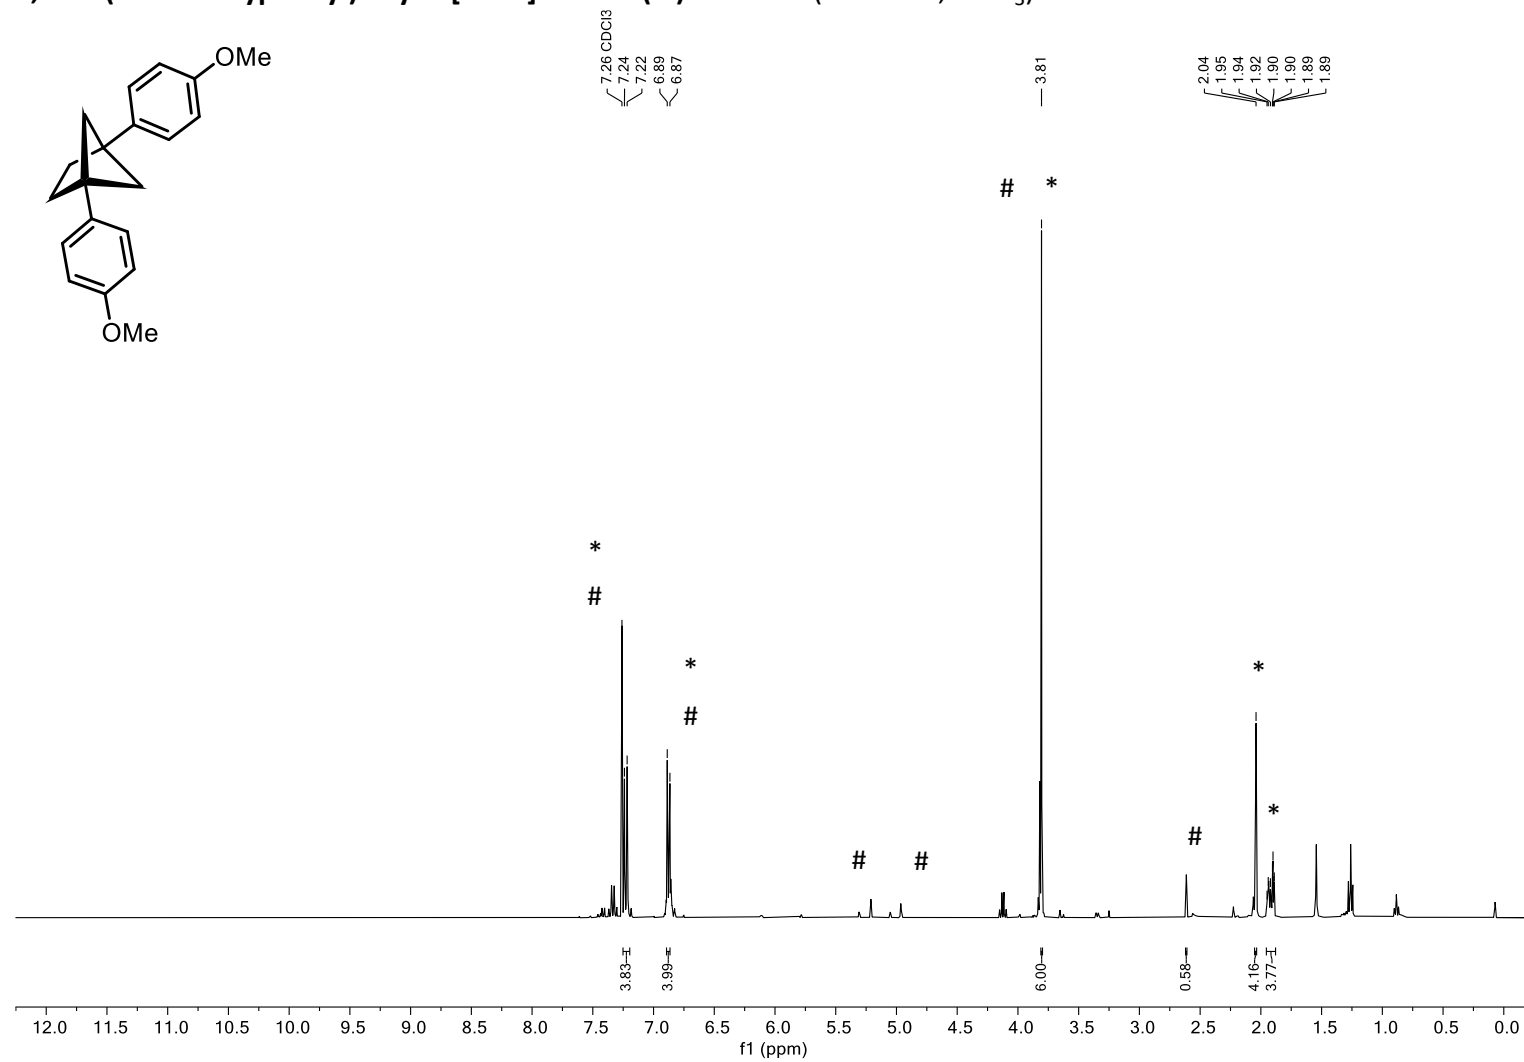# = diene **1I**, \* = BCH **2I**

**1,4-Bis(4-methoxyphenyl)bicyclo[2.1.1]hexane (2I):**  $^{13}\text{C}\{^1\text{H}\}$  NMR (101 MHz,  $\text{CDCl}_3$ )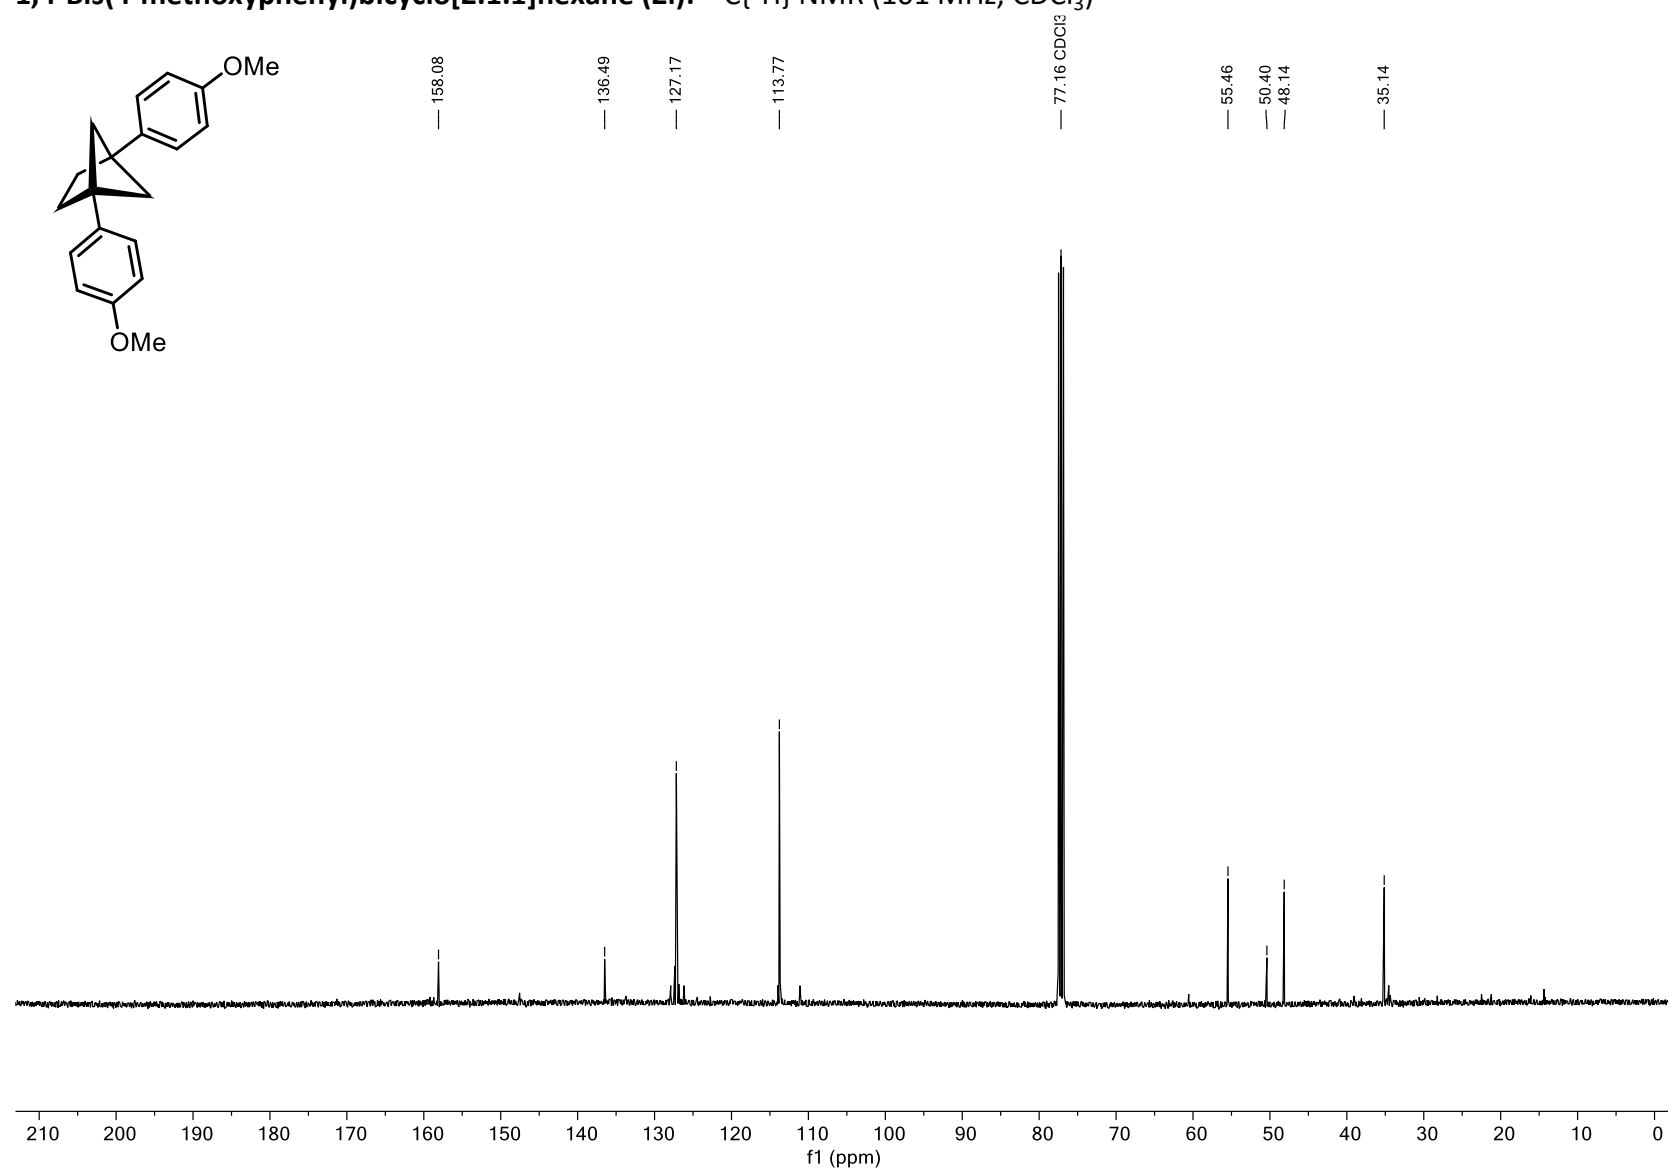



1,4-Di(pyridin-2-yl)bicyclo[2.1.1]hexane (2m):  $^1\text{H}$  NMR (300 MHz,  $\text{CDCl}_3$ )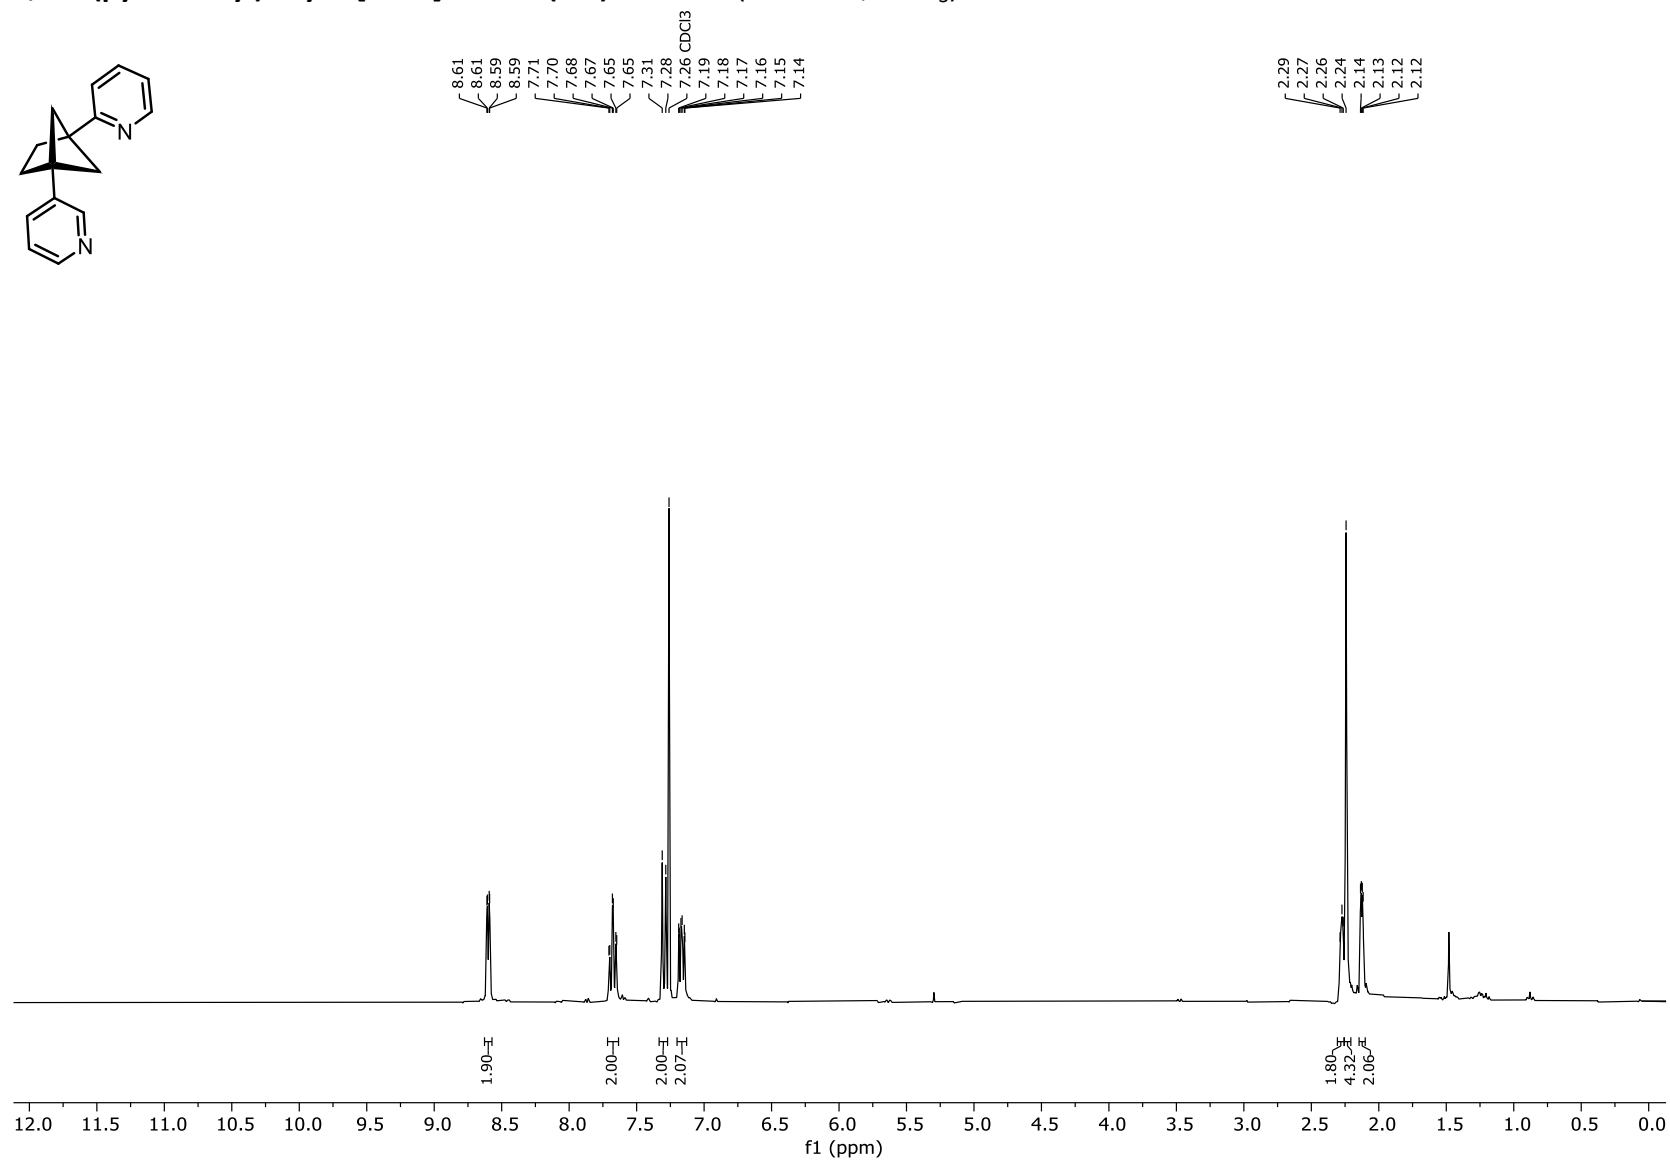

**1,4-Di(pyridin-2-yl)bicyclo[2.1.1]hexane (2m):**  $^{13}\text{C}\{^1\text{H}\}$  NMR (101 MHz,  $\text{CDCl}_3$ )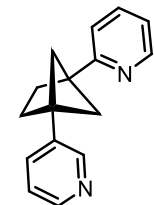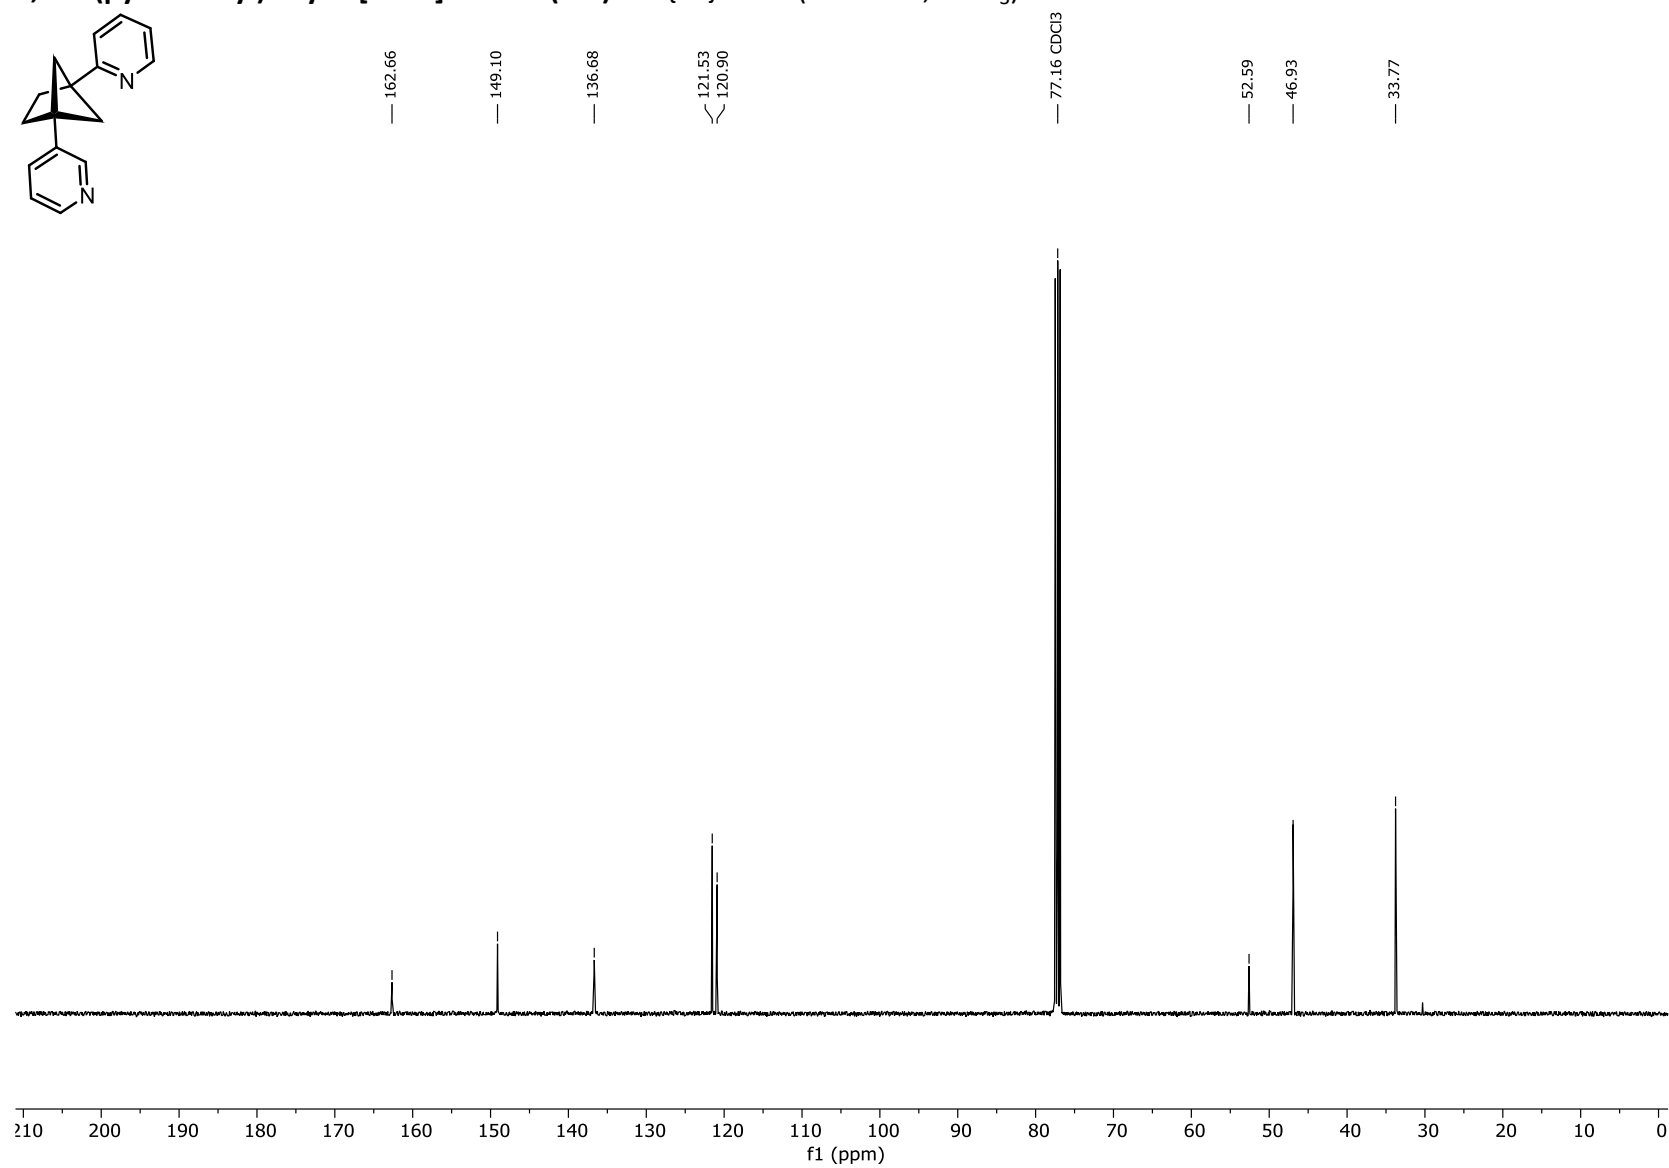

**1,4-Di(naphthalen-2-yl)bicyclo[2.1.1]hexane (2n):  $^1\text{H}$  NMR (300 MHz,  $\text{CDCl}_3$ )**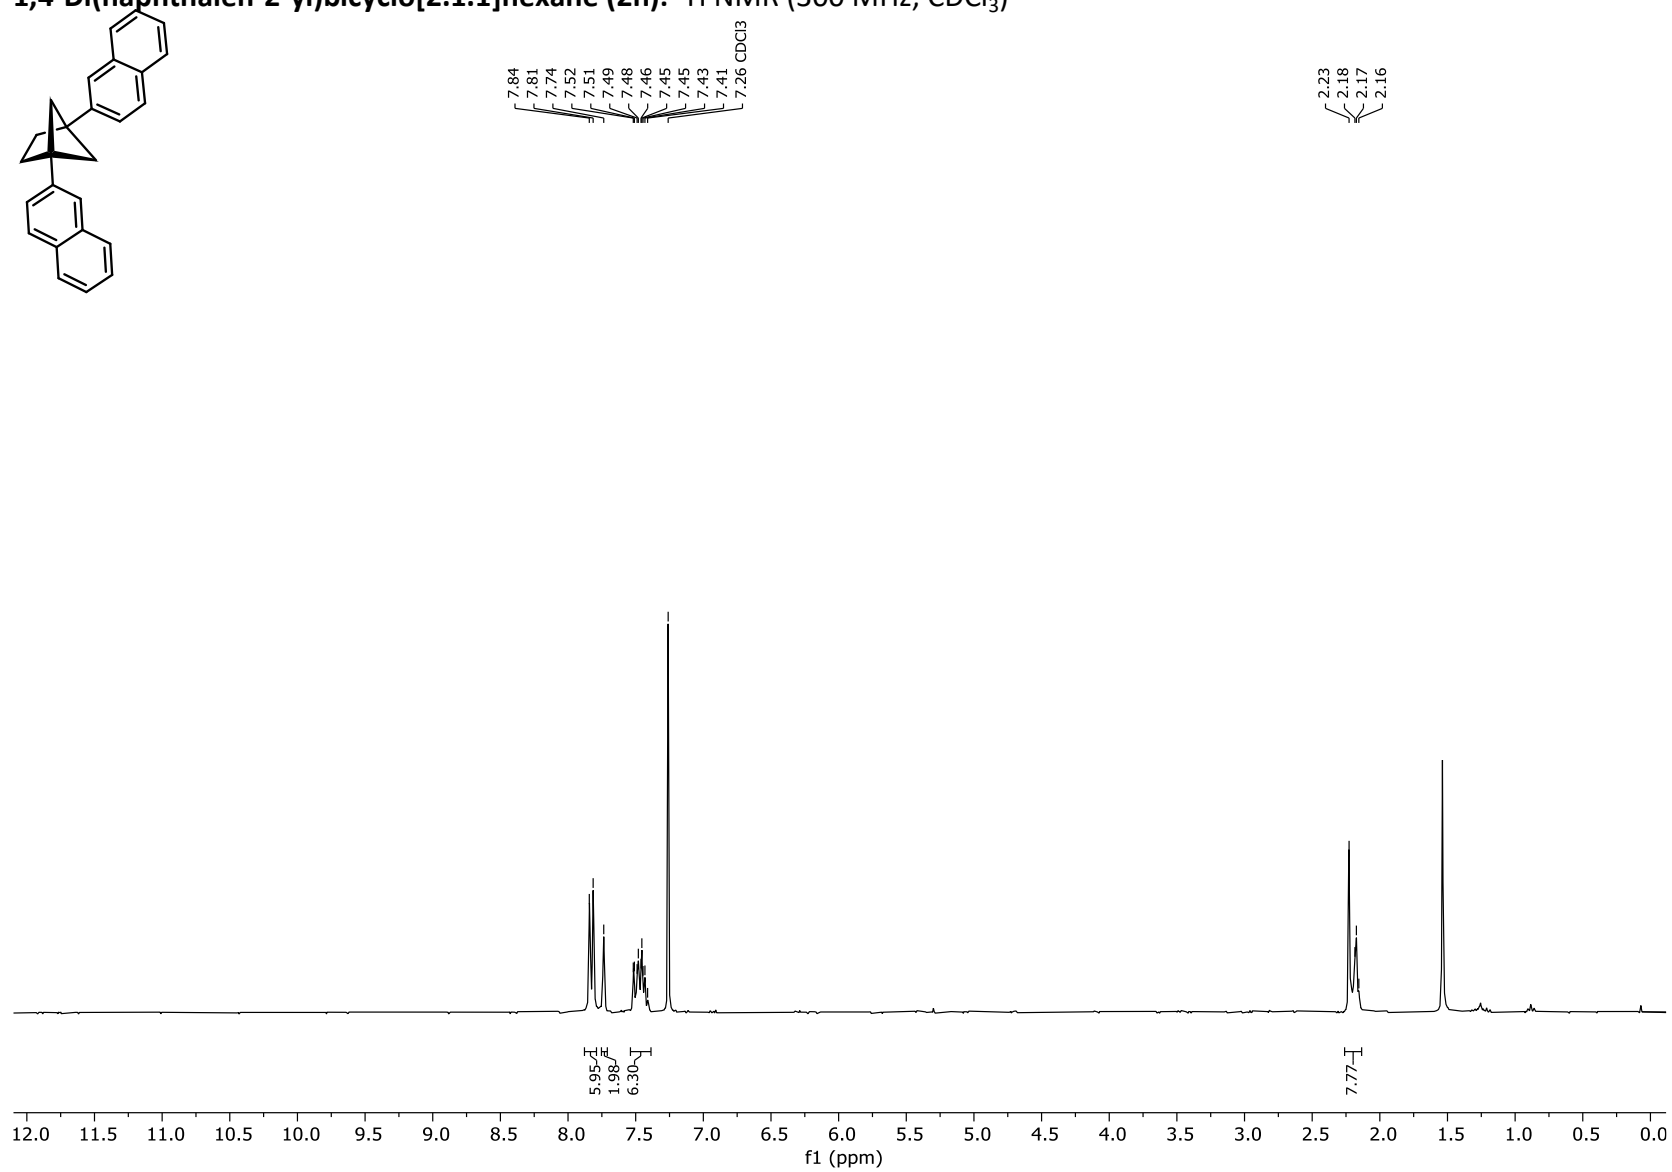

**1,4-Di(naphthalen-2-yl)bicyclo[2.1.1]hexane (2n):**  $^{13}\text{C}\{^1\text{H}\}$  NMR (101 MHz,  $\text{CDCl}_3$ )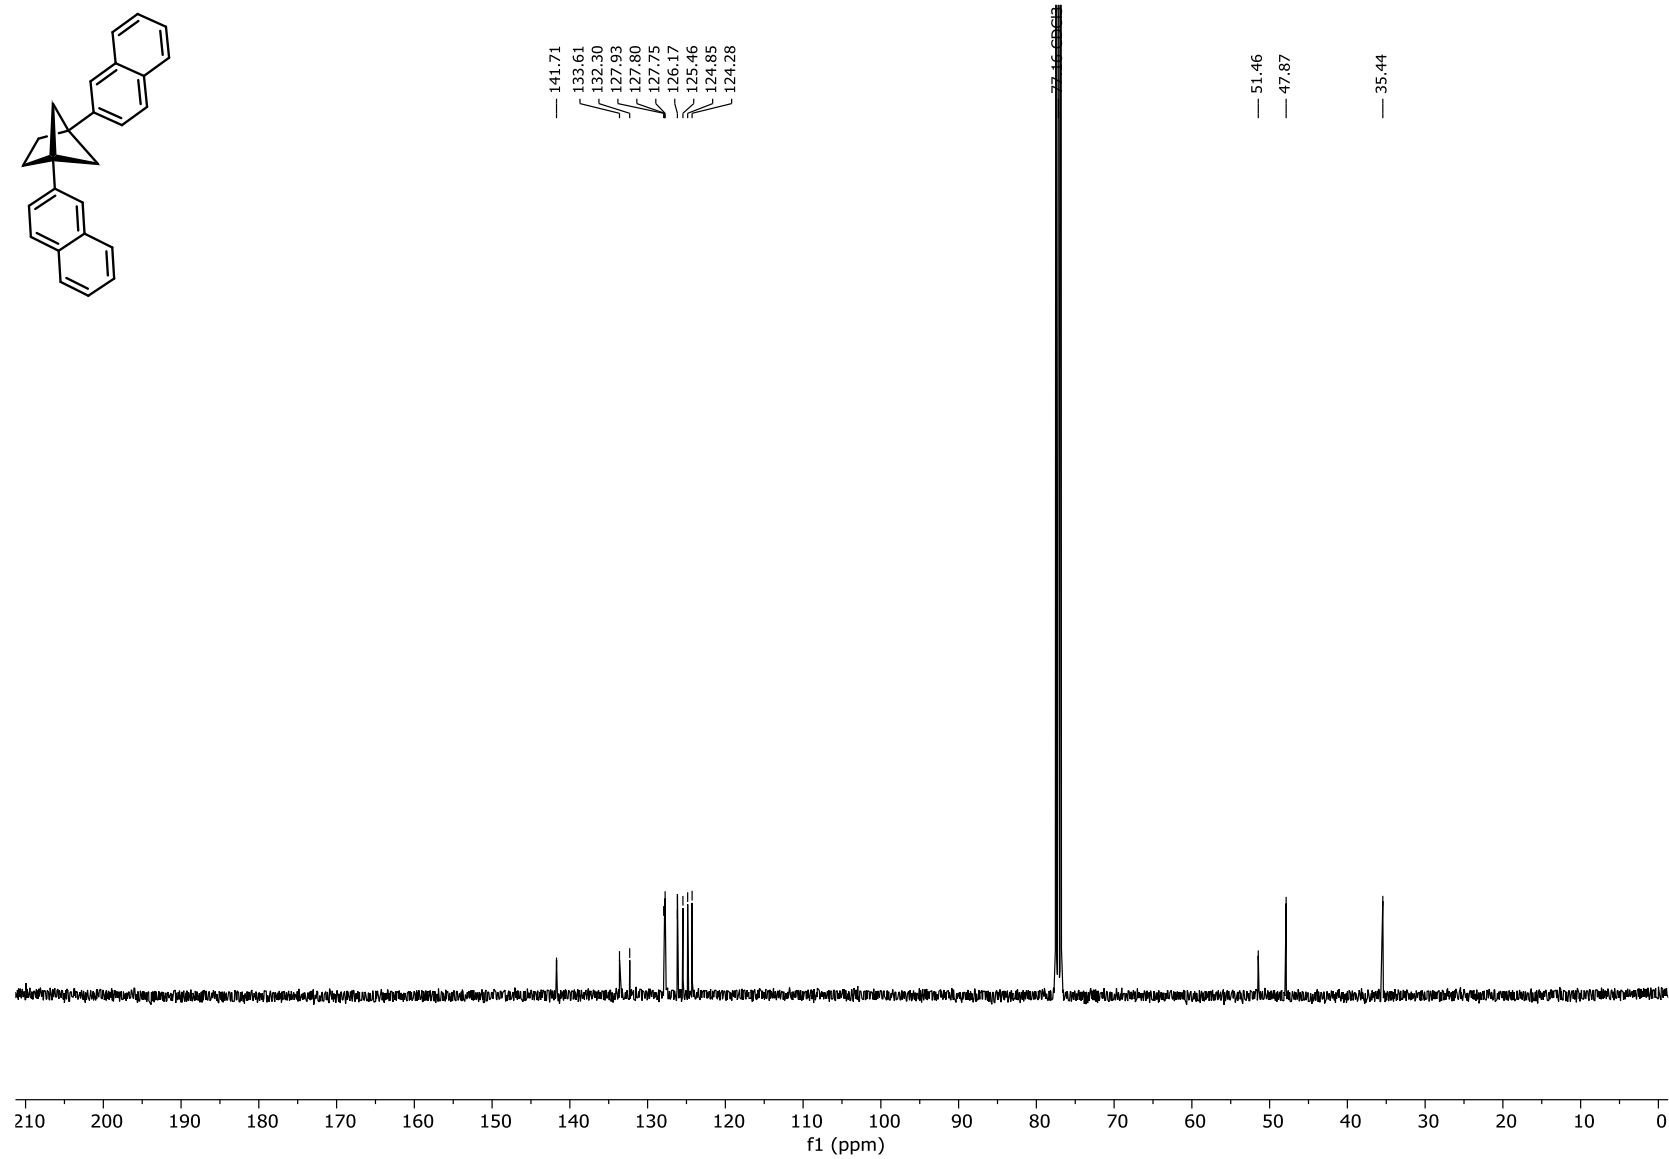

**1-Phenyl-4-(4-(trifluoromethyl)phenyl)bicyclo[2.1.1]hexane (2o):**  $^1\text{H}$  NMR (300 MHz,  $\text{CDCl}_3$ )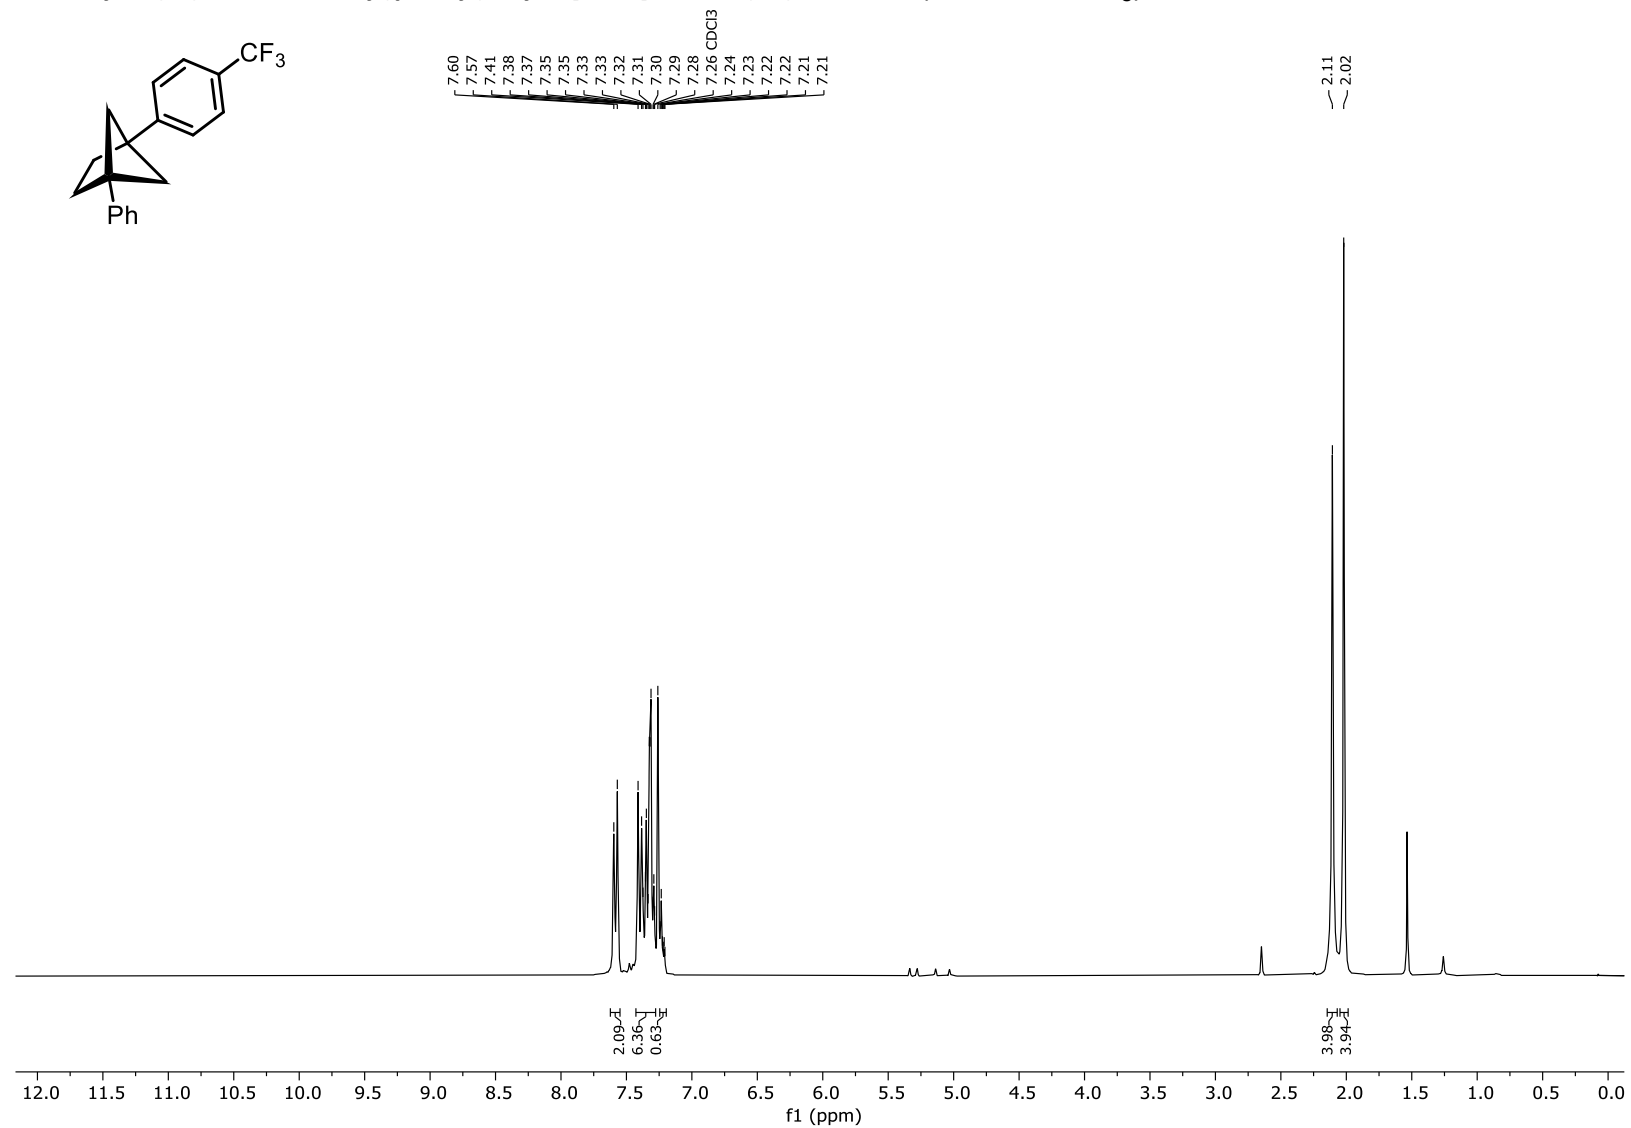**1-Phenyl-4-(4-(trifluoromethyl)phenyl)bicyclo[2.1.1]hexane (xx):**  $^{13}\text{C}\{^1\text{H}\}$  NMR (75 MHz,  $\text{CDCl}_3$ )

1-Phenyl-4-(4-(trifluoromethyl)phenyl)bicyclo[2.1.1]hexane (**2o**):  $^{13}\text{C}\{^1\text{H}\}$  NMR (75 MHz,  $\text{CDCl}_3$ )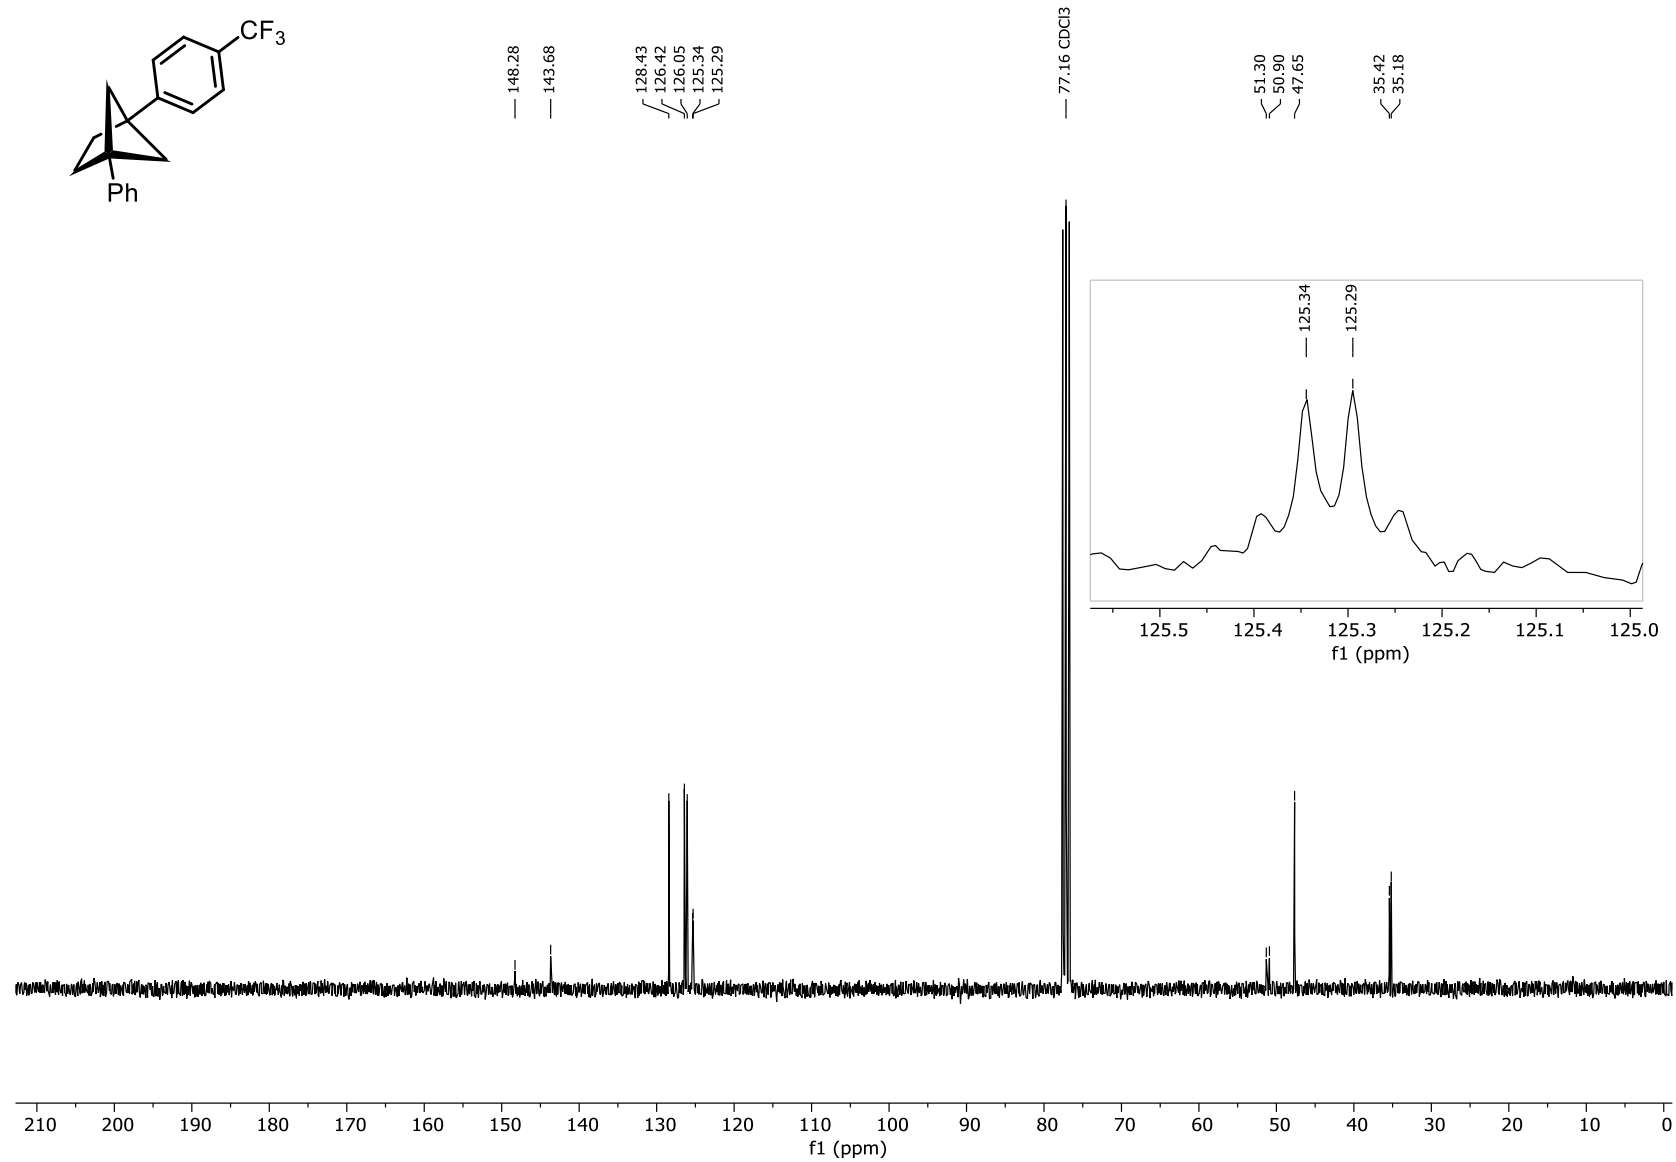

**1-Phenyl-4-(4-(trifluoromethyl)phenyl)bicyclo[2.1.1]hexane (2o):**  $^{19}\text{F}\{^1\text{H}\}$  NMR (75 MHz,  $\text{CDCl}_3$ )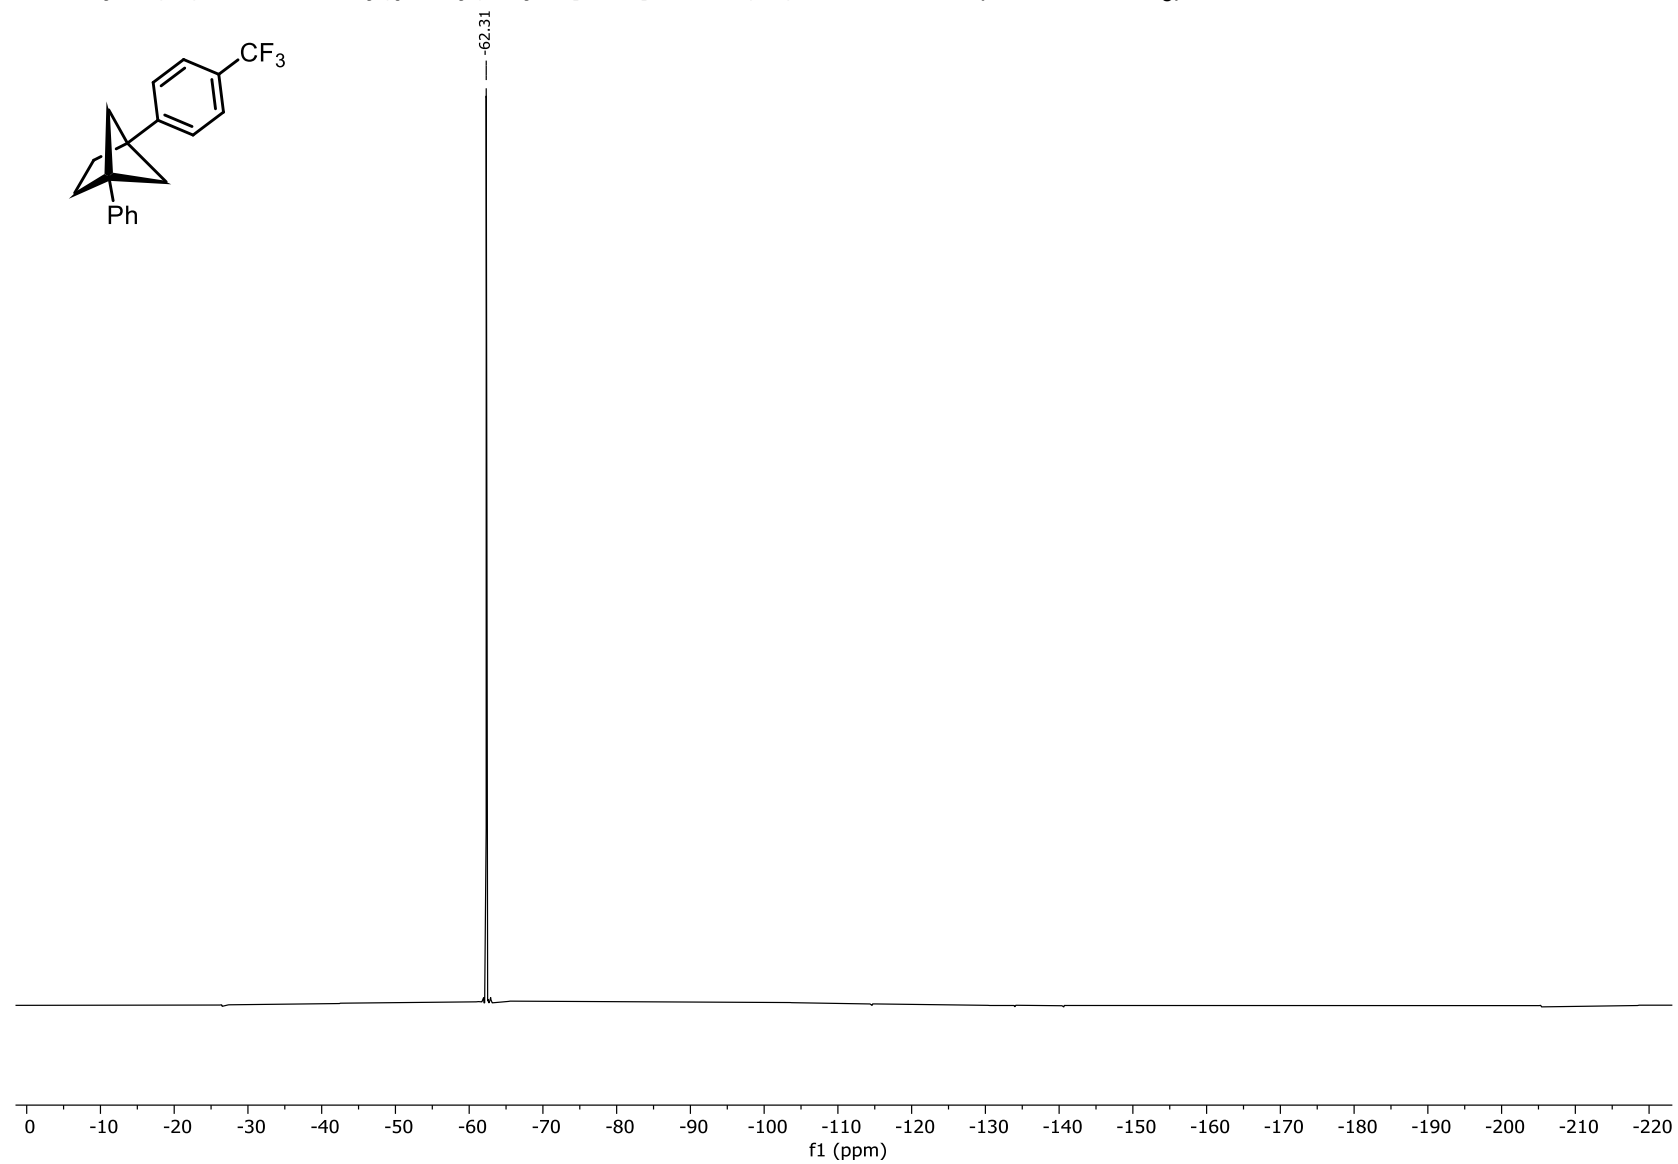

Ethyl 1-phenylbicyclo[2.1.1]hexane-2-carboxylate (**2p**):  $^1\text{H}$  NMR (300 MHz,  $\text{CDCl}_3$ )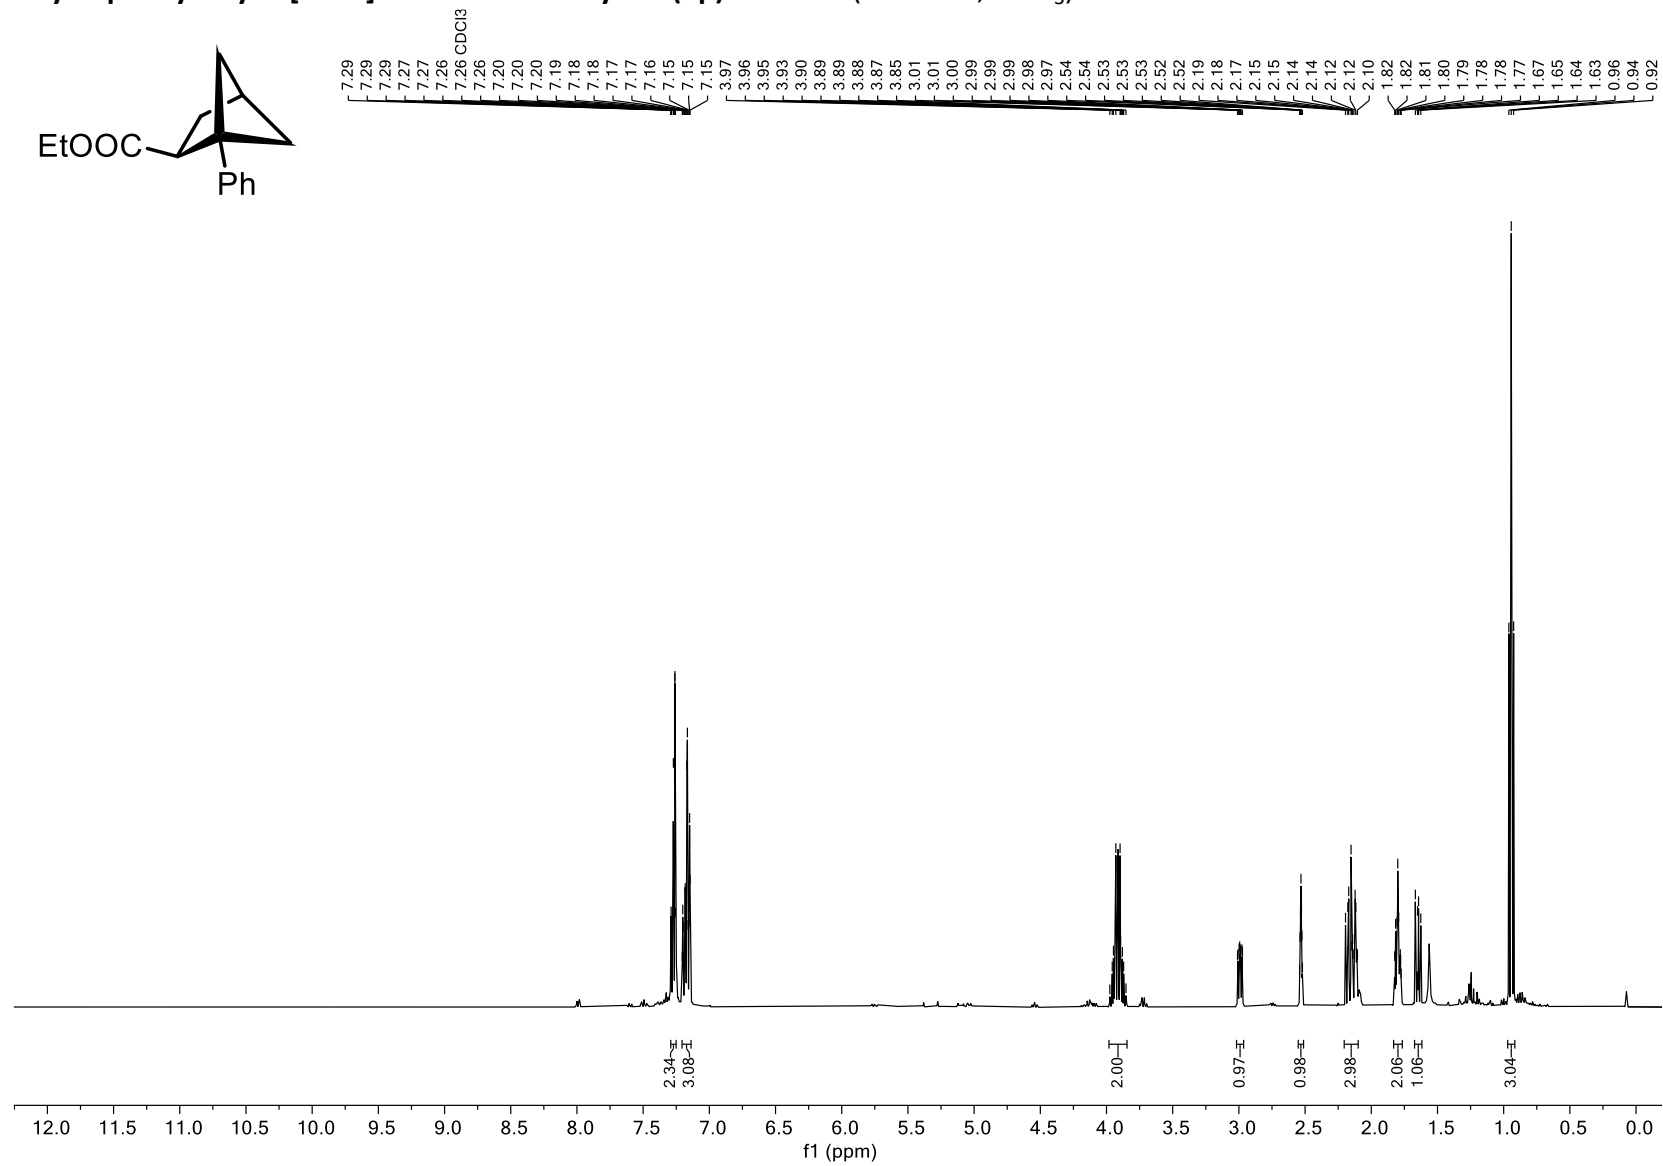



Ethyl 1-phenylbicyclo[2.1.1]hexane-2-carboxylate (**2p**):  $^{13}\text{C}\{^1\text{H}\}$  NMR (101 MHz,  $\text{CDCl}_3$ )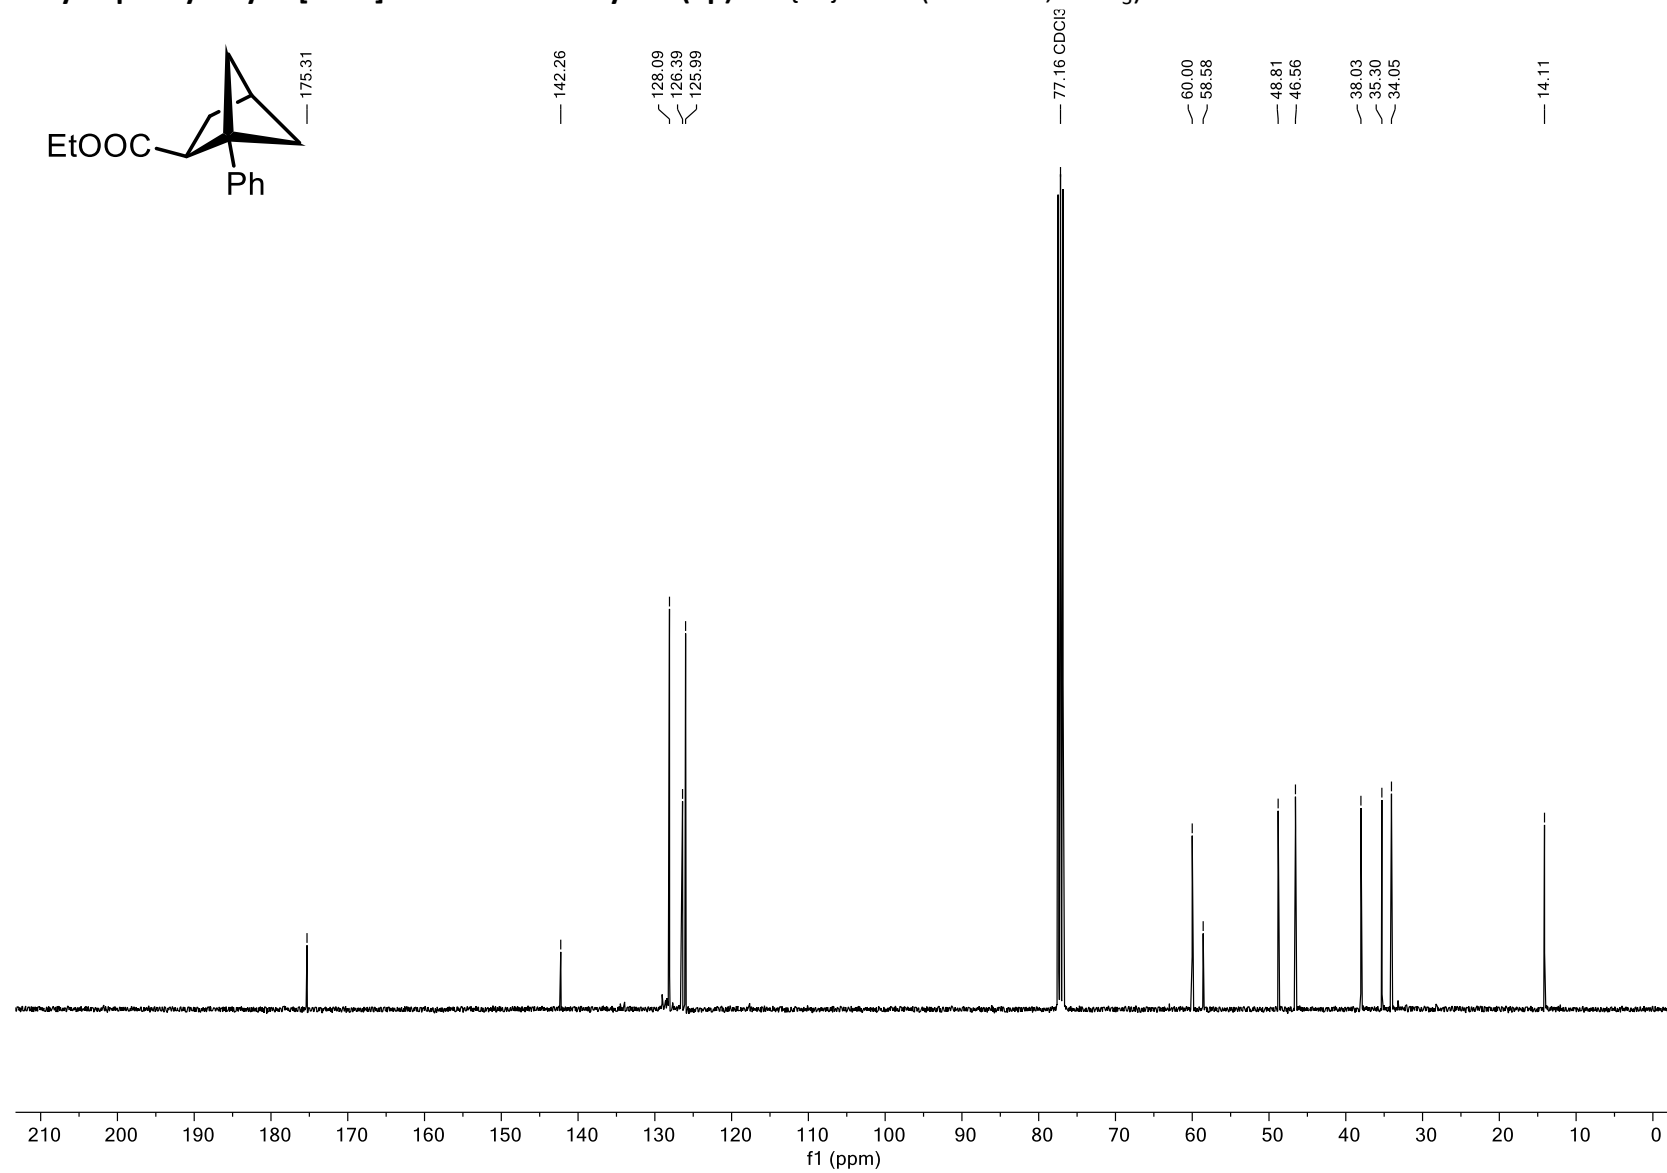

Phenylbicyclo[2.1.1]hexan-2-ol (2q):  $^1\text{H}$  NMR (400 MHz,  $\text{CDCl}_3$ )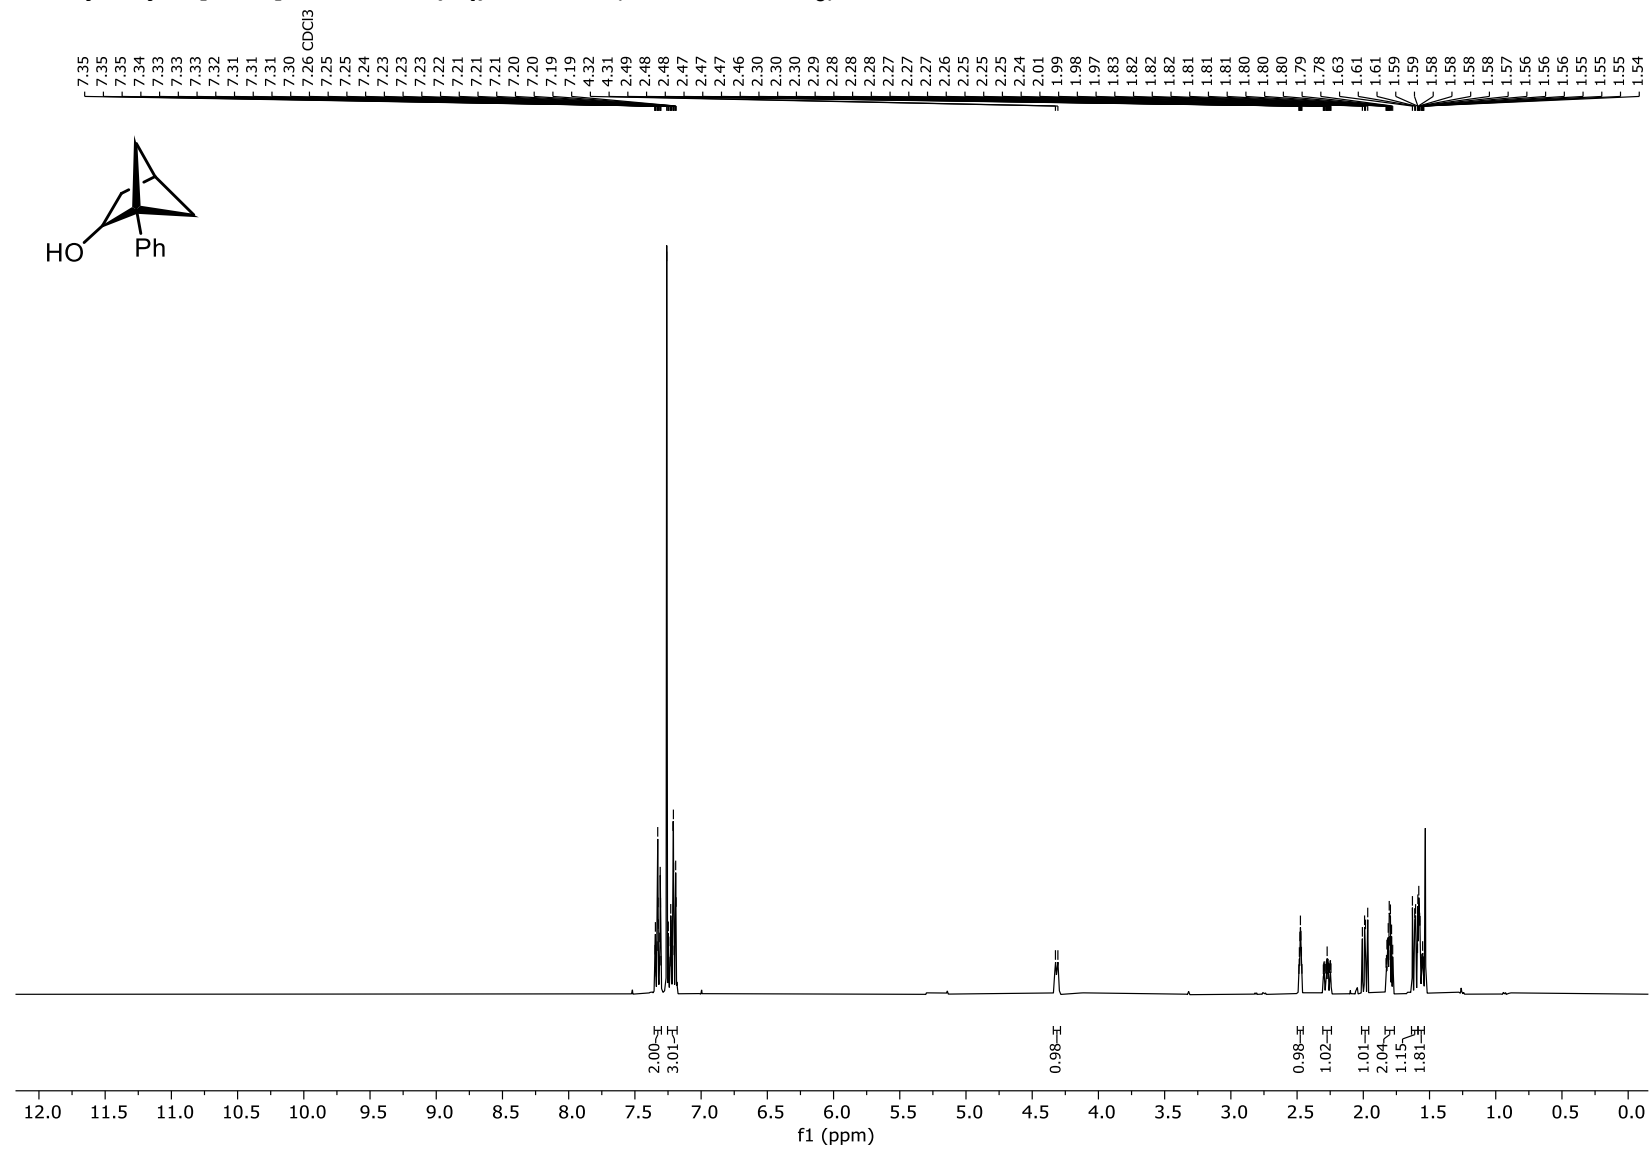

1-Phenylbicyclo[2.1.1]hexan-2-ol (2q):  $^{13}\text{C}\{^1\text{H}\}$  NMR (101 MHz,  $\text{CDCl}_3$ )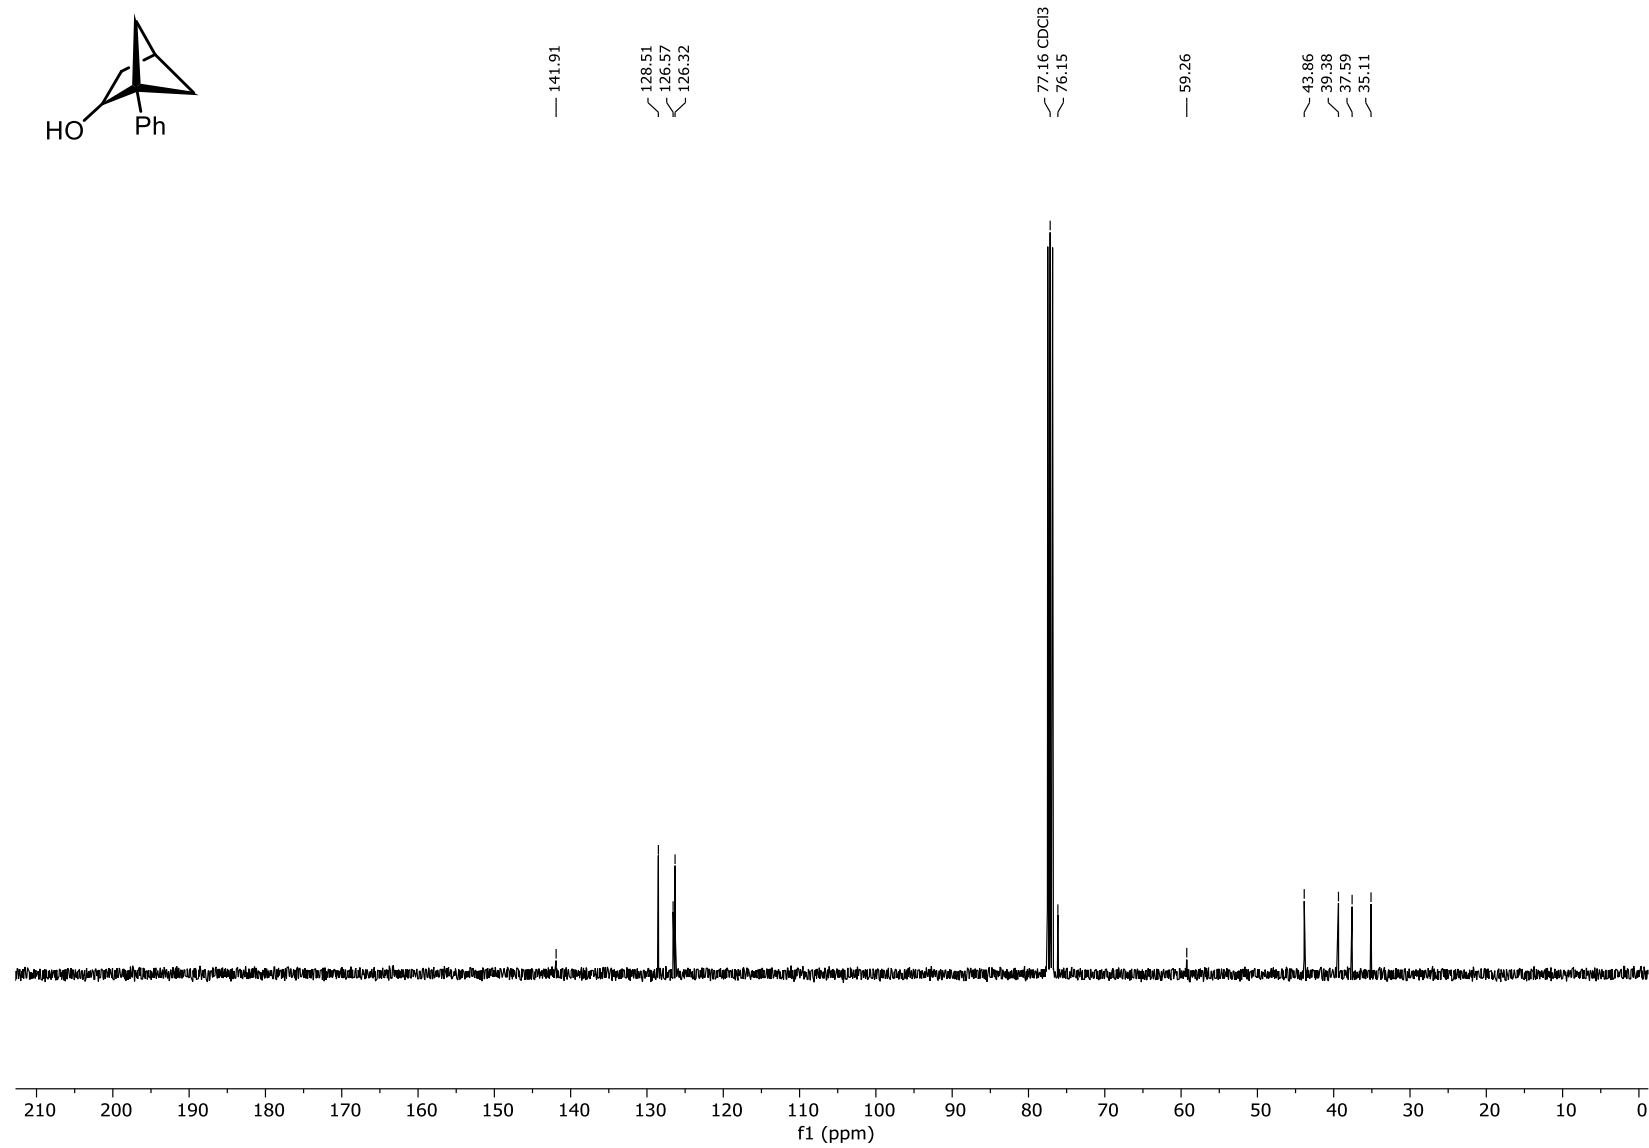

**(S)-4-benzyl-3-((2S)-1-phenylbicyclo[2.1.1]hexane-2-carbonyl)oxazolidin-2-one (2r): <sup>1</sup>H NMR (400 MHz, CDCl<sub>3</sub>)**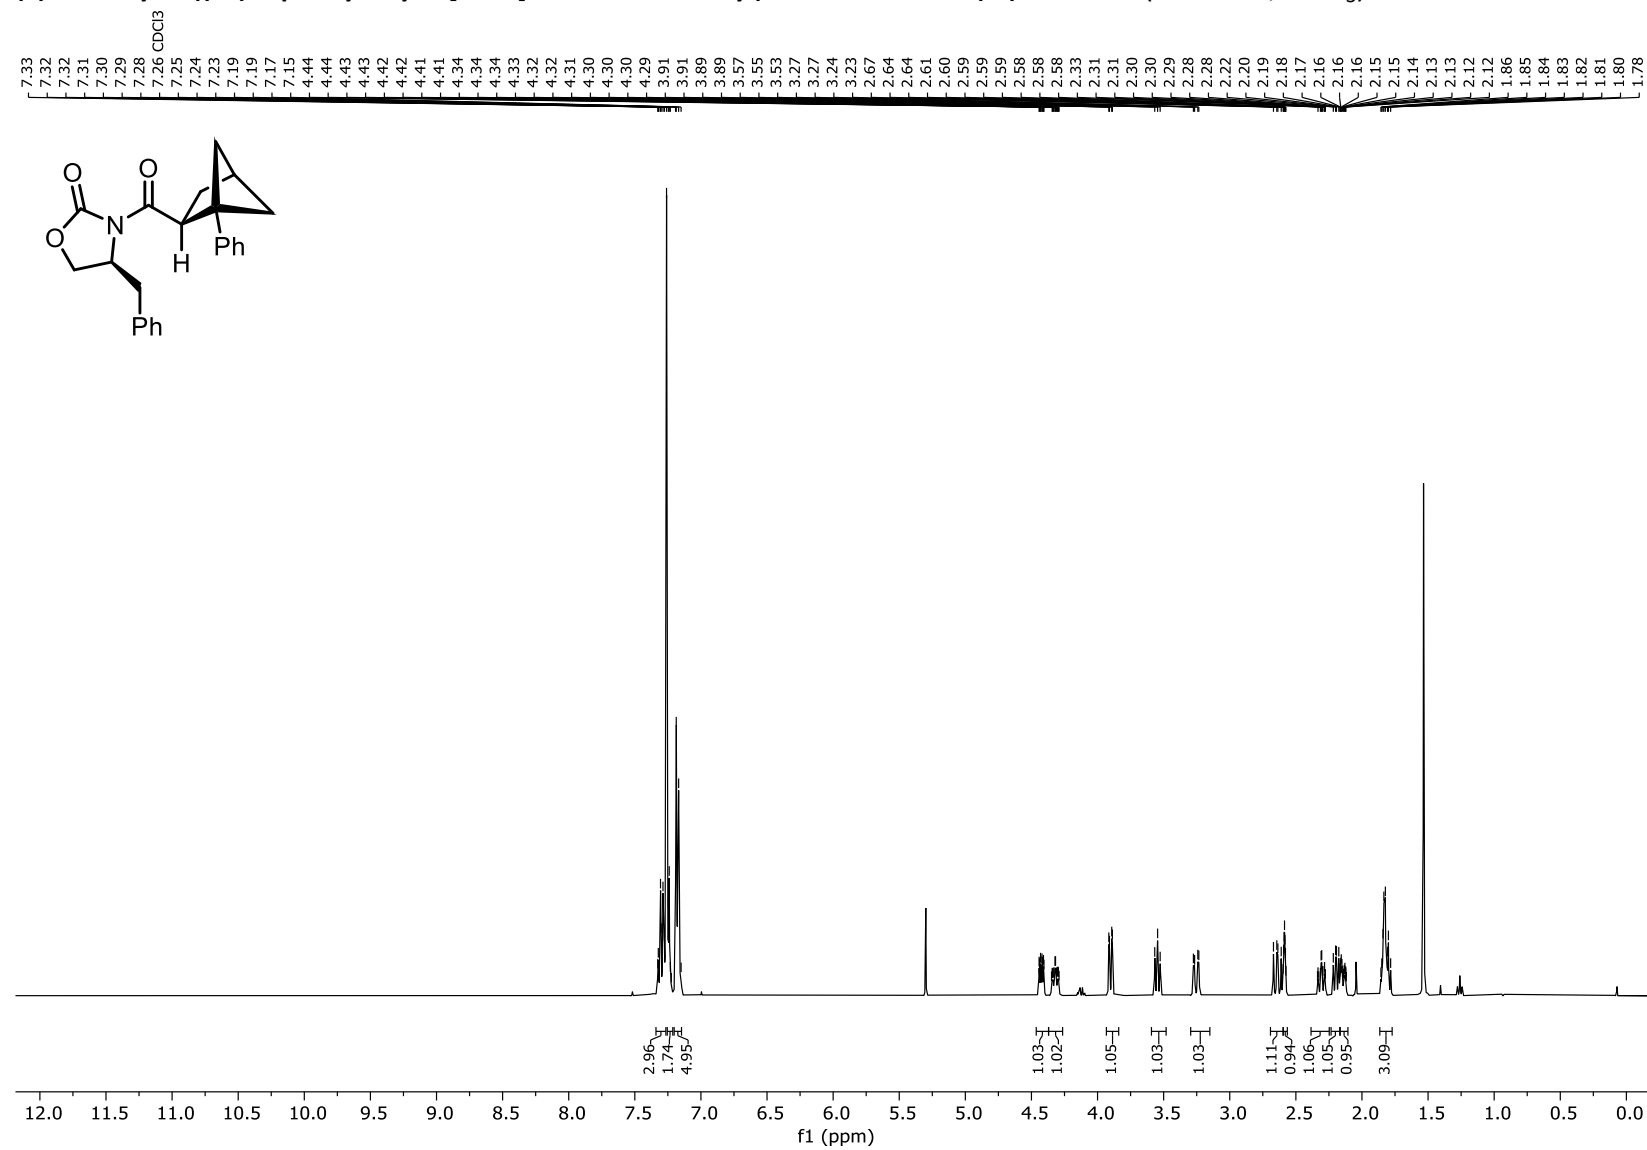

(S)-4-benzyl-3-((2S)-1-phenylbicyclo[2.1.1]hexane-2-carbonyl)oxazolidin-2-one (2r):  $^{13}\text{C}\{^1\text{H}\}$  NMR (101 MHz,  $\text{CDCl}_3$ )

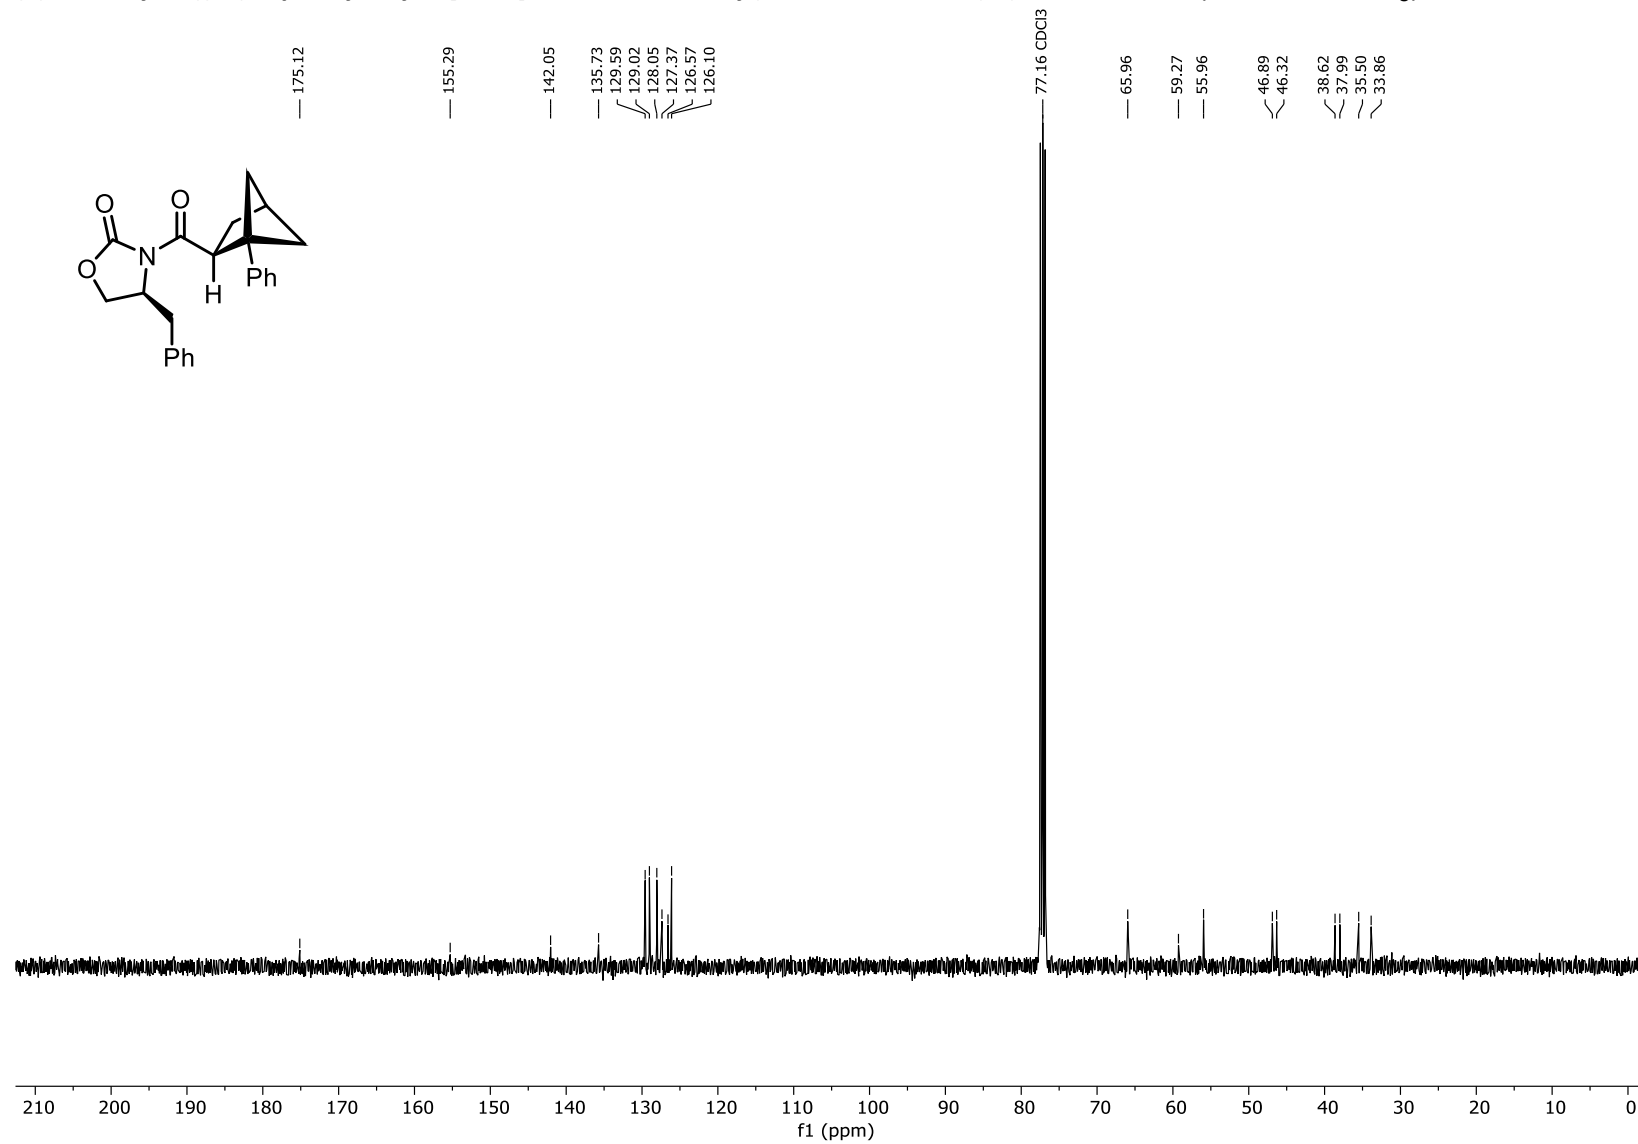

**(S)-4-benzyl-3-((2S)-1-phenylbicyclo[2.1.1]hexane-2-carbonyl)oxazolidin-2-one (2r): NOESY (400 MHz, CDCl<sub>3</sub>)**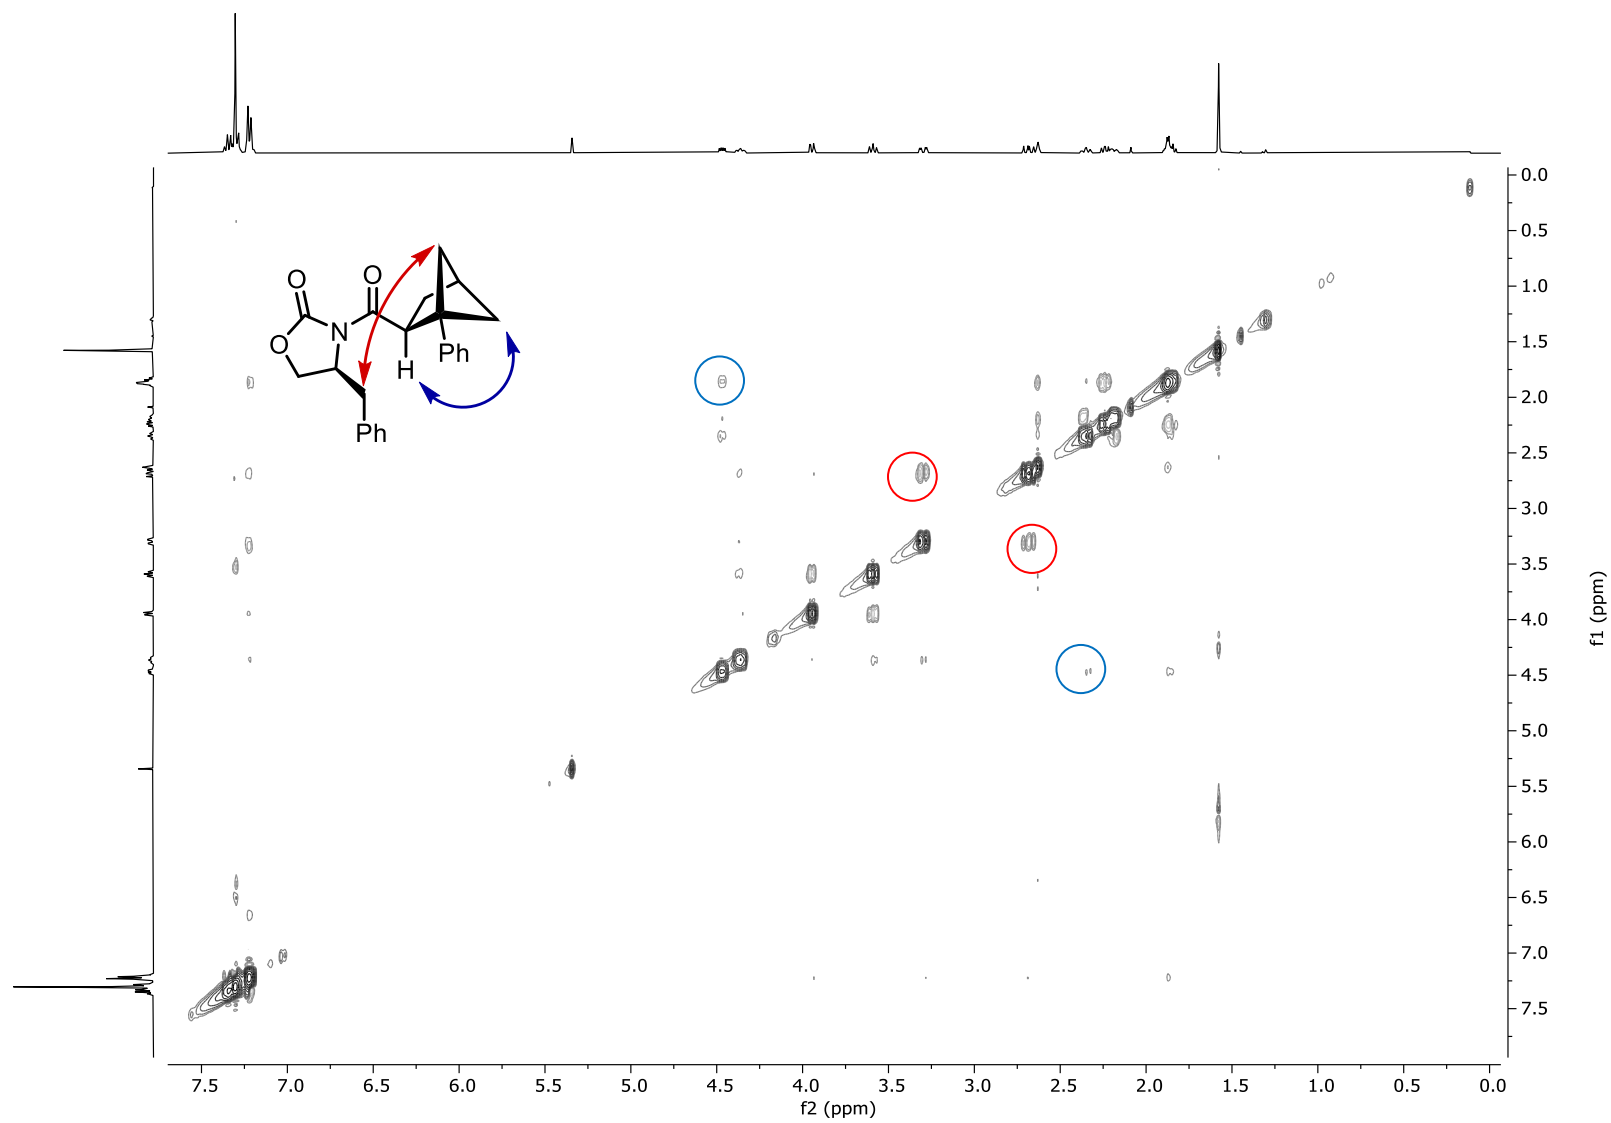

**3-(4-Fluorophenyl)-1-phenylbicyclo[2.1.1]hexane (2s):**  $^1\text{H}$  NMR (300 MHz,  $\text{CDCl}_3$ )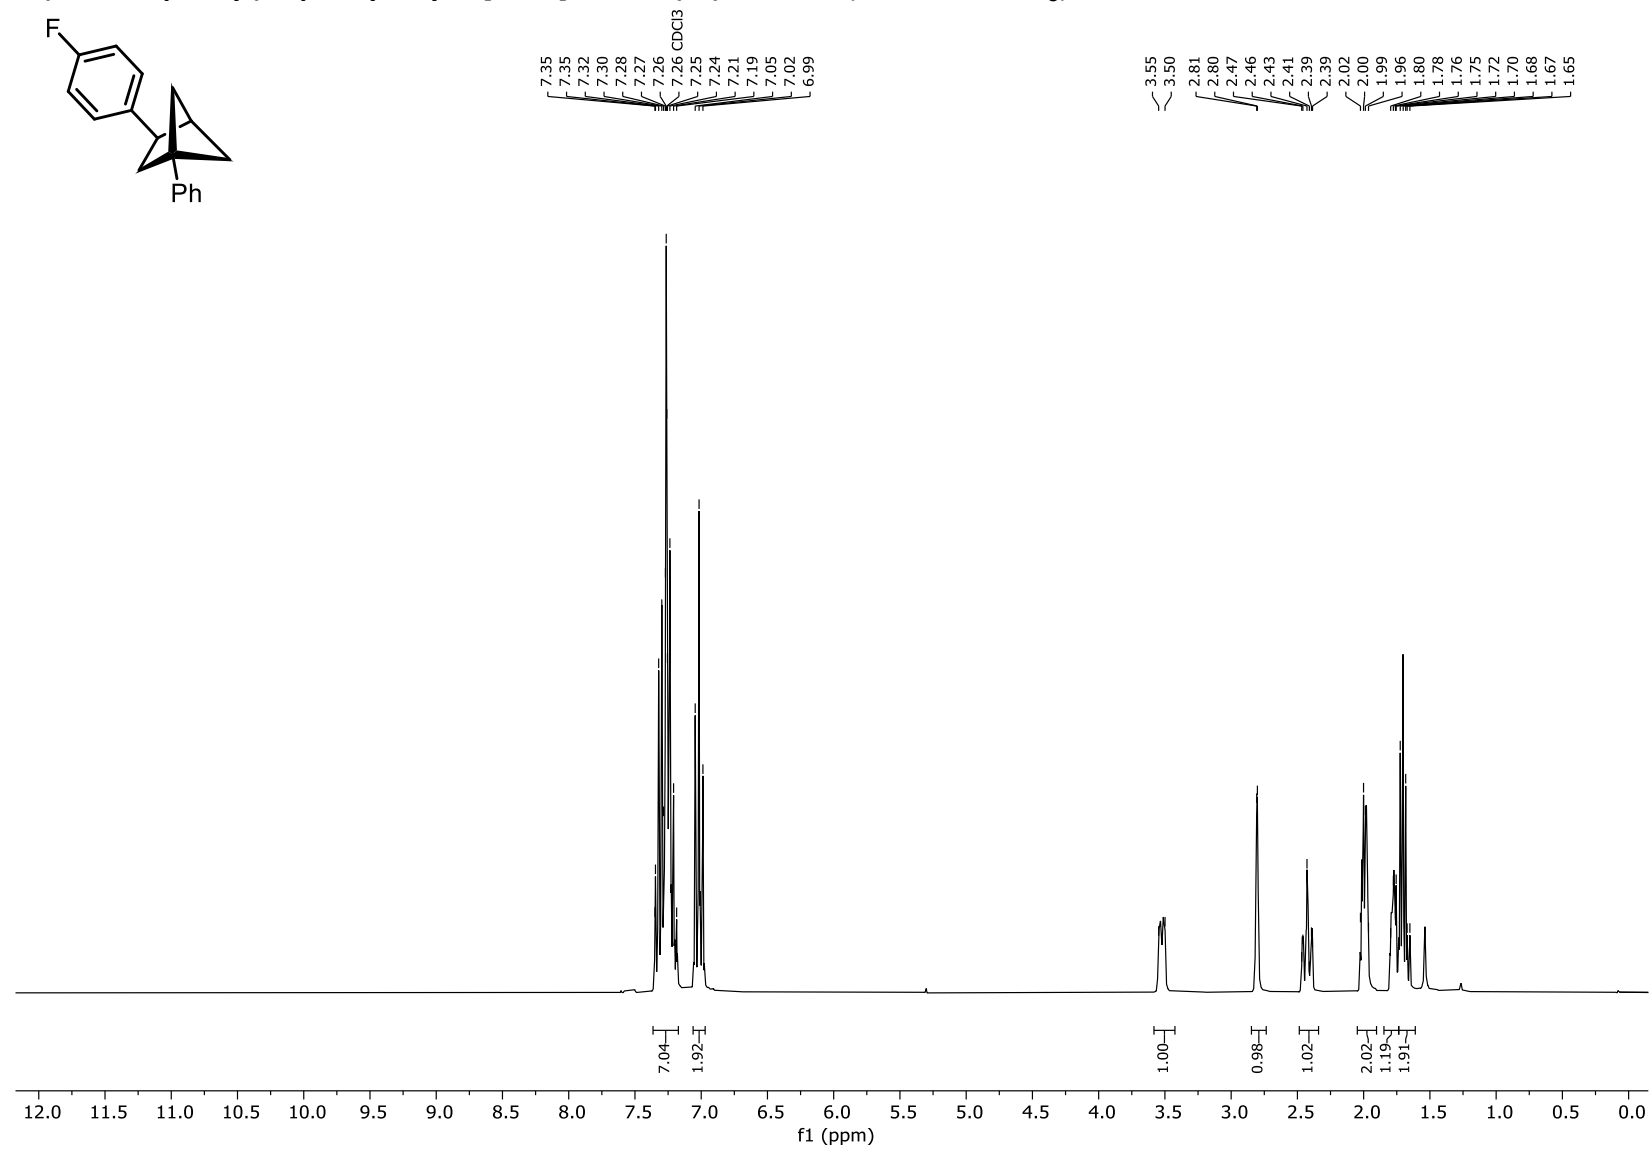

**3-(4-Fluorophenyl)-1-phenylbicyclo[2.1.1]hexane (2s):**  $^{13}\text{C}\{^1\text{H}\}$  NMR (101 MHz,  $\text{CDCl}_3$ )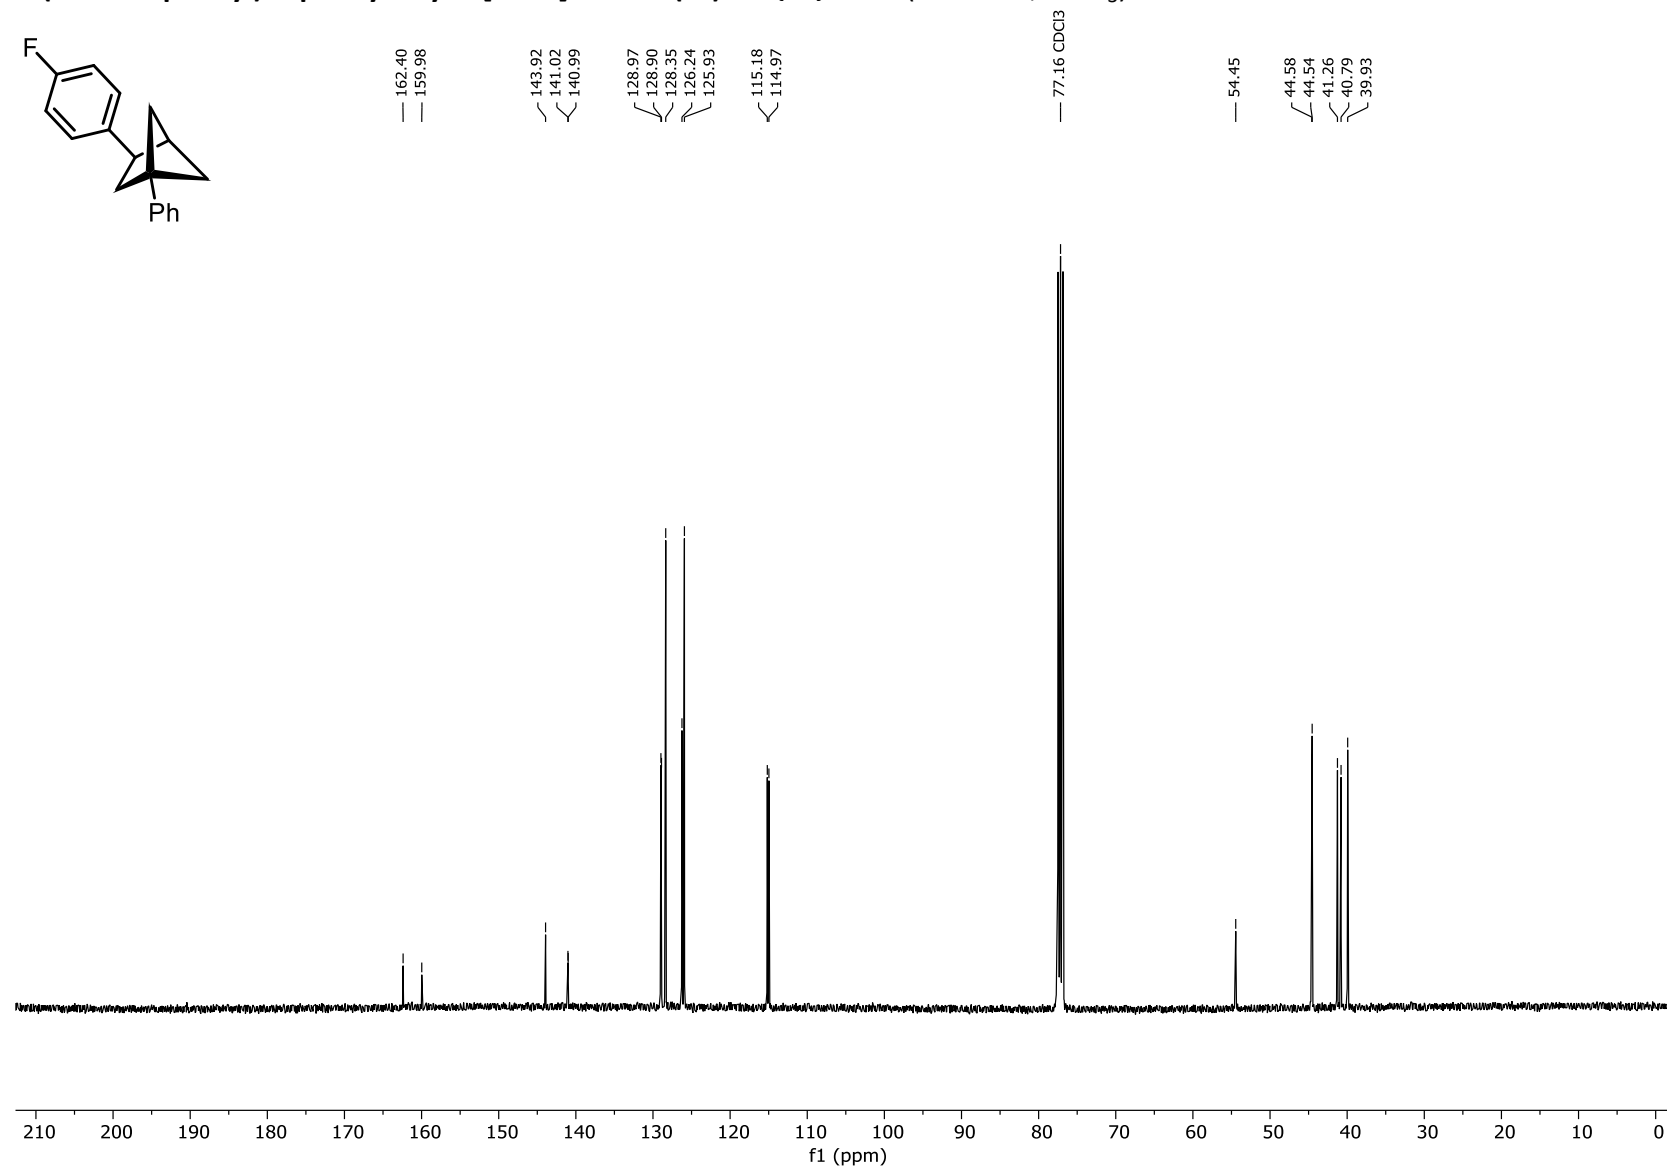



**3-(4-Fluorophenyl)-1-phenylbicyclo[2.1.1]hexane (2s):**  $^{19}\text{F}\{^1\text{H}\}$  NMR (282 MHz,  $\text{CDCl}_3$ )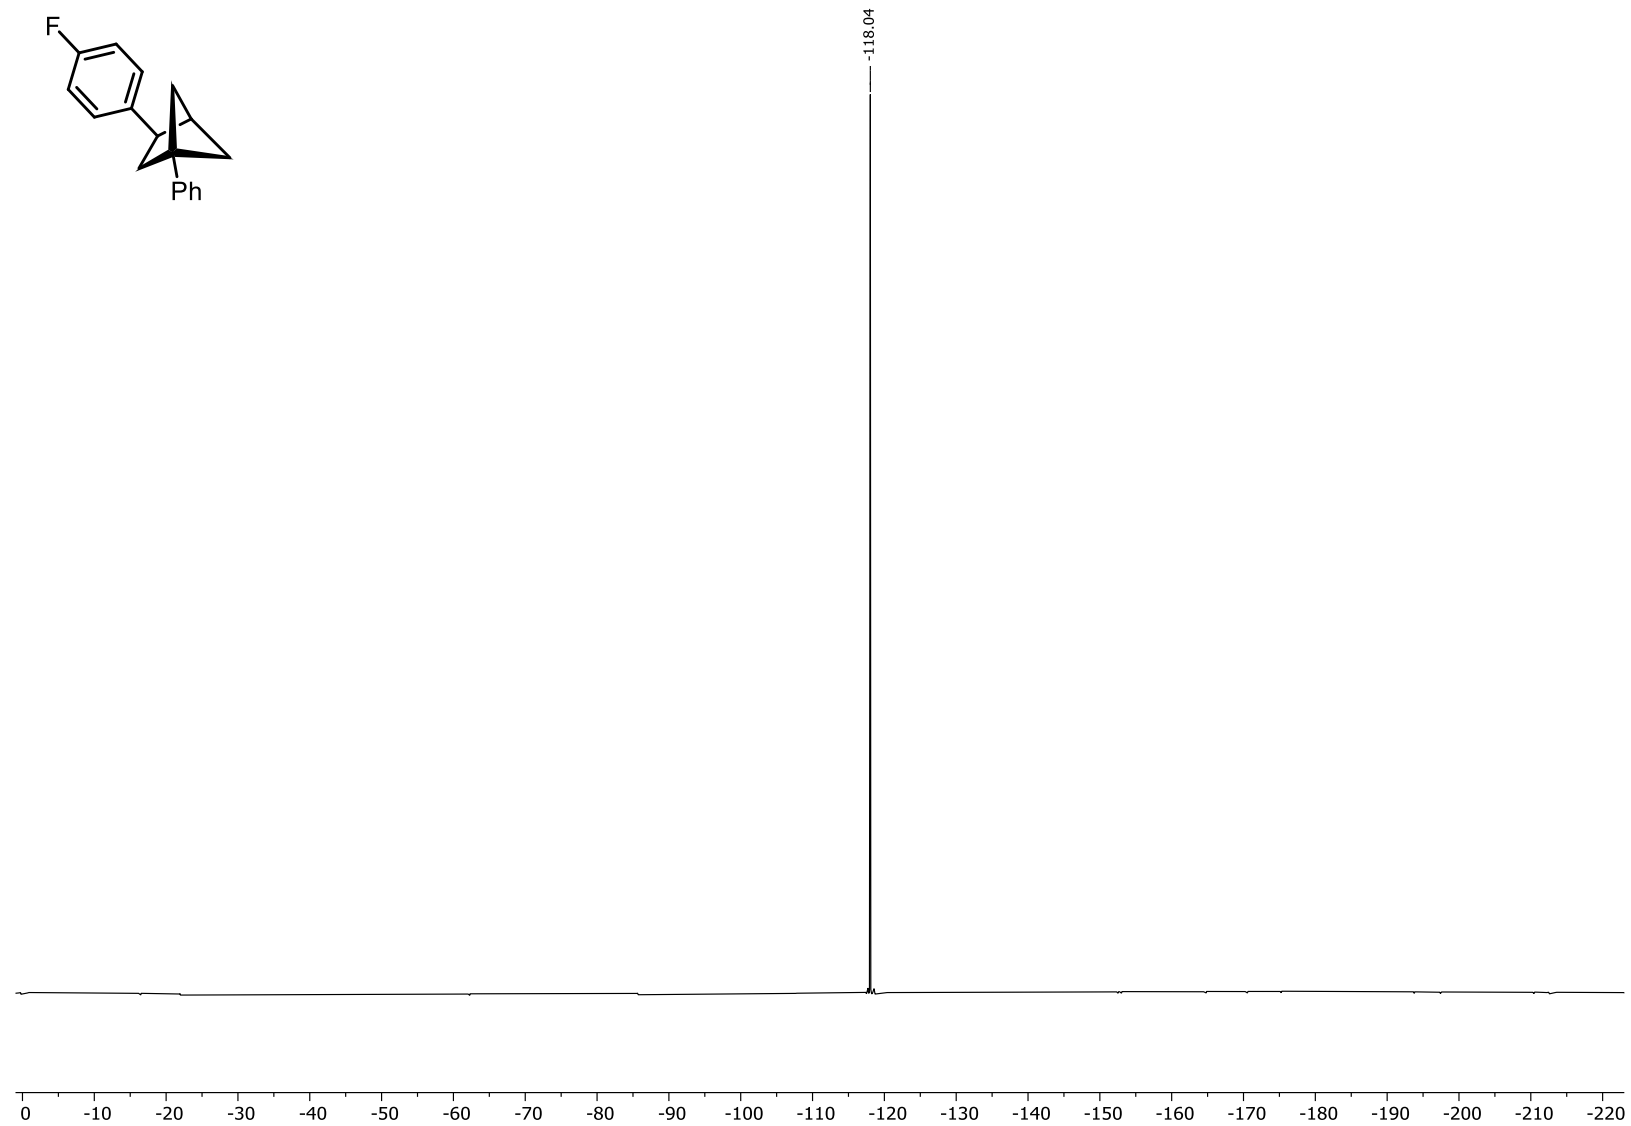

3-(4-Phenylbicyclo[2.1.1]hexan-2-yl)pyridine (**2t**):  $^1\text{H}$  NMR (300 MHz,  $\text{CDCl}_3$ )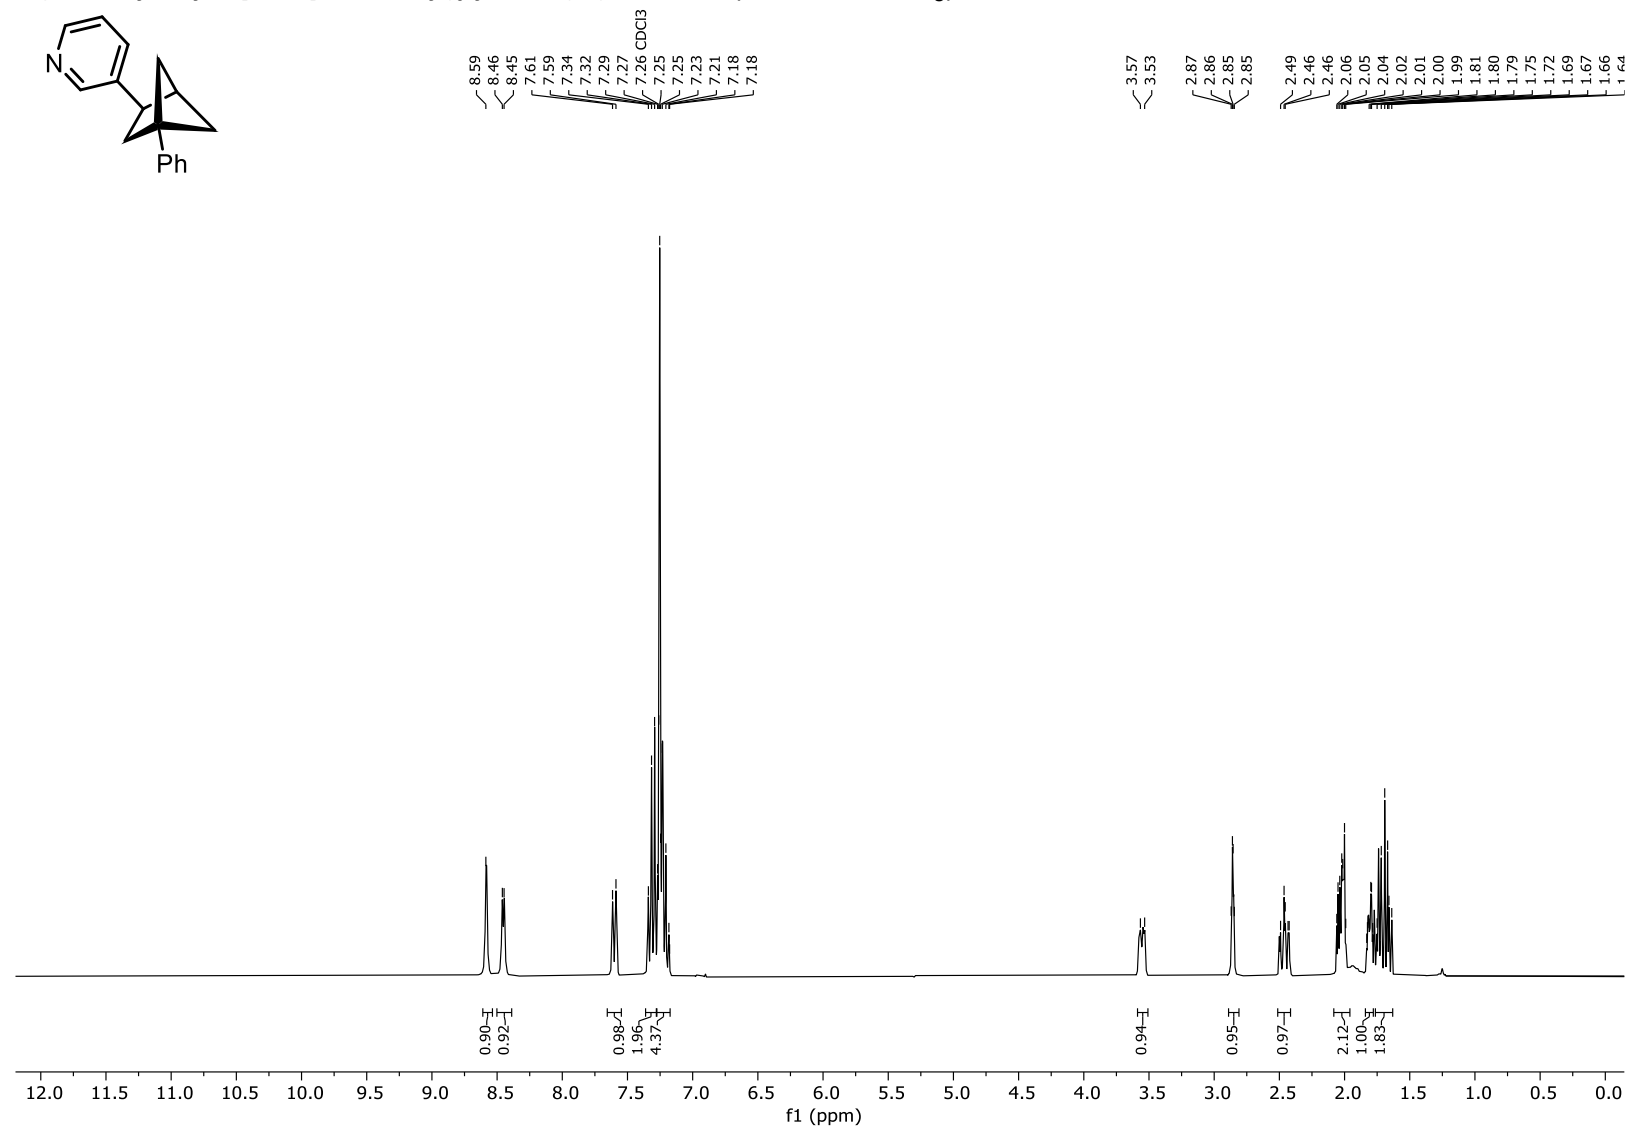

**3-(4-Phenylbicyclo[2.1.1]hexan-2-yl)pyridine (2t):**  $^{13}\text{C}\{^1\text{H}\}$  NMR (101 MHz,  $\text{CDCl}_3$ )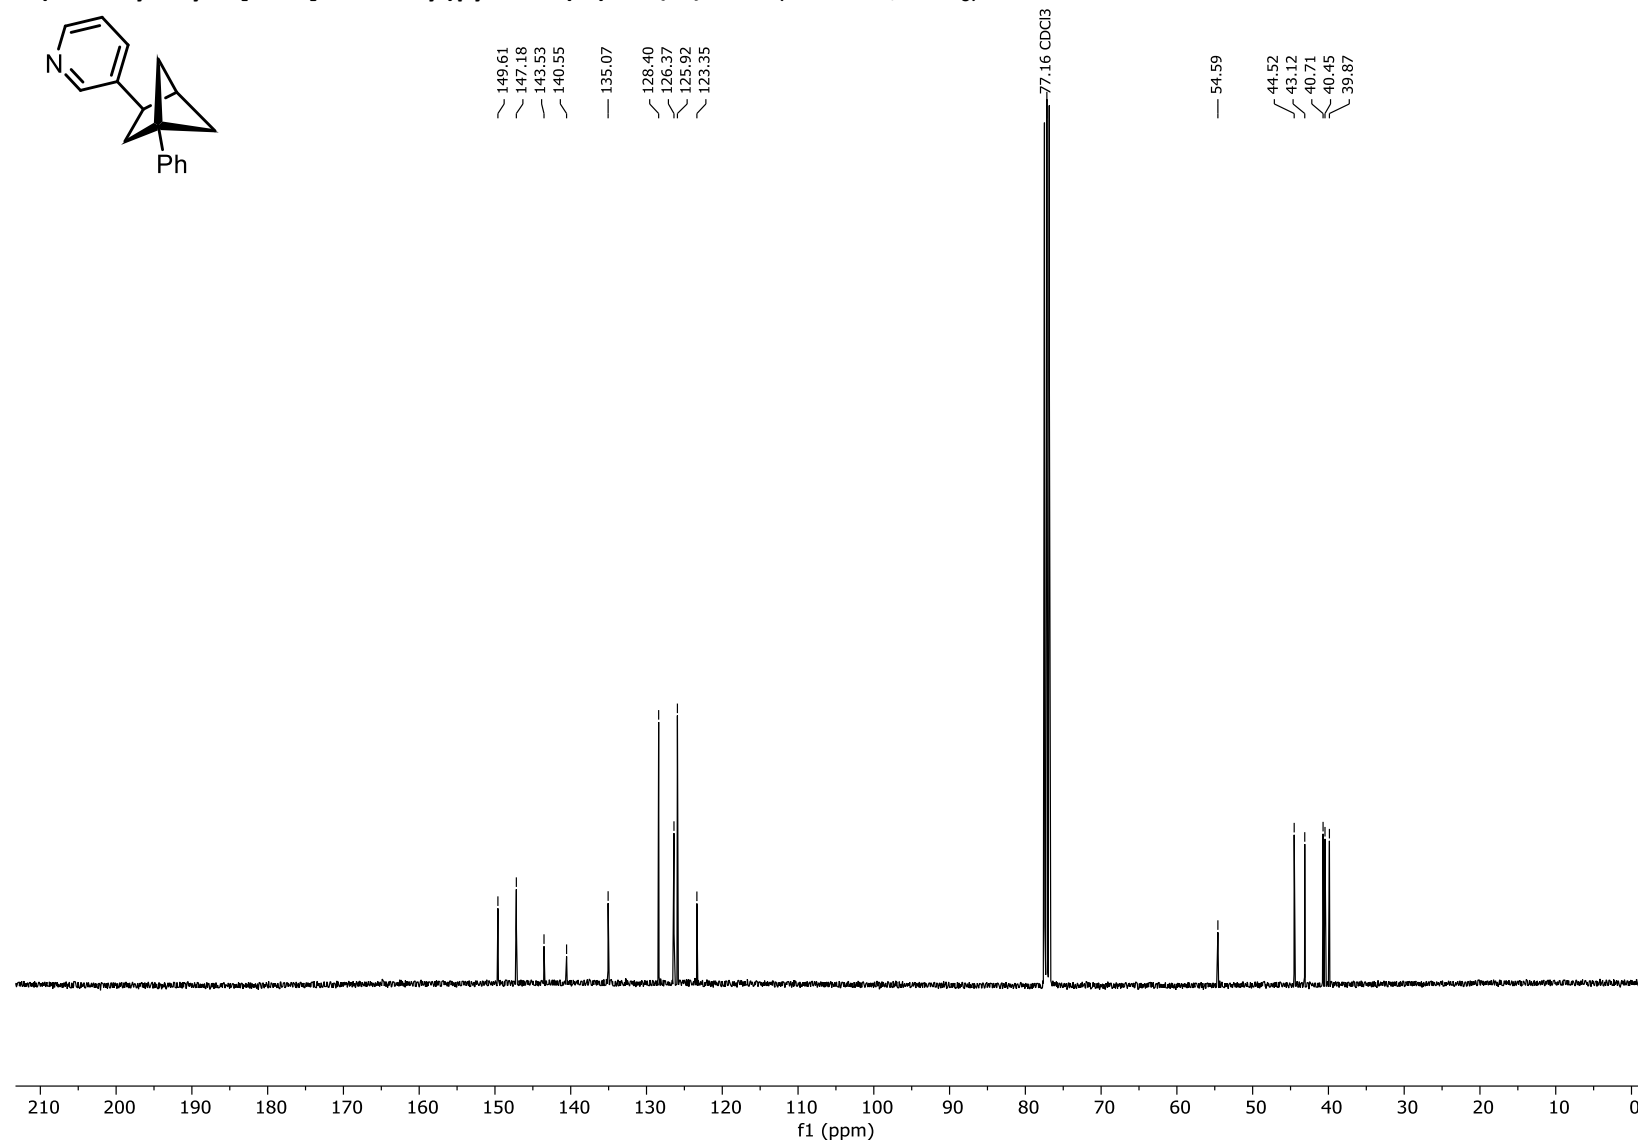

Ethyl 1-phenylbicyclo[2.1.1]hexane-5-carboxylate (**2u**):  $^1\text{H}$  NMR (300 MHz,  $\text{CDCl}_3$ )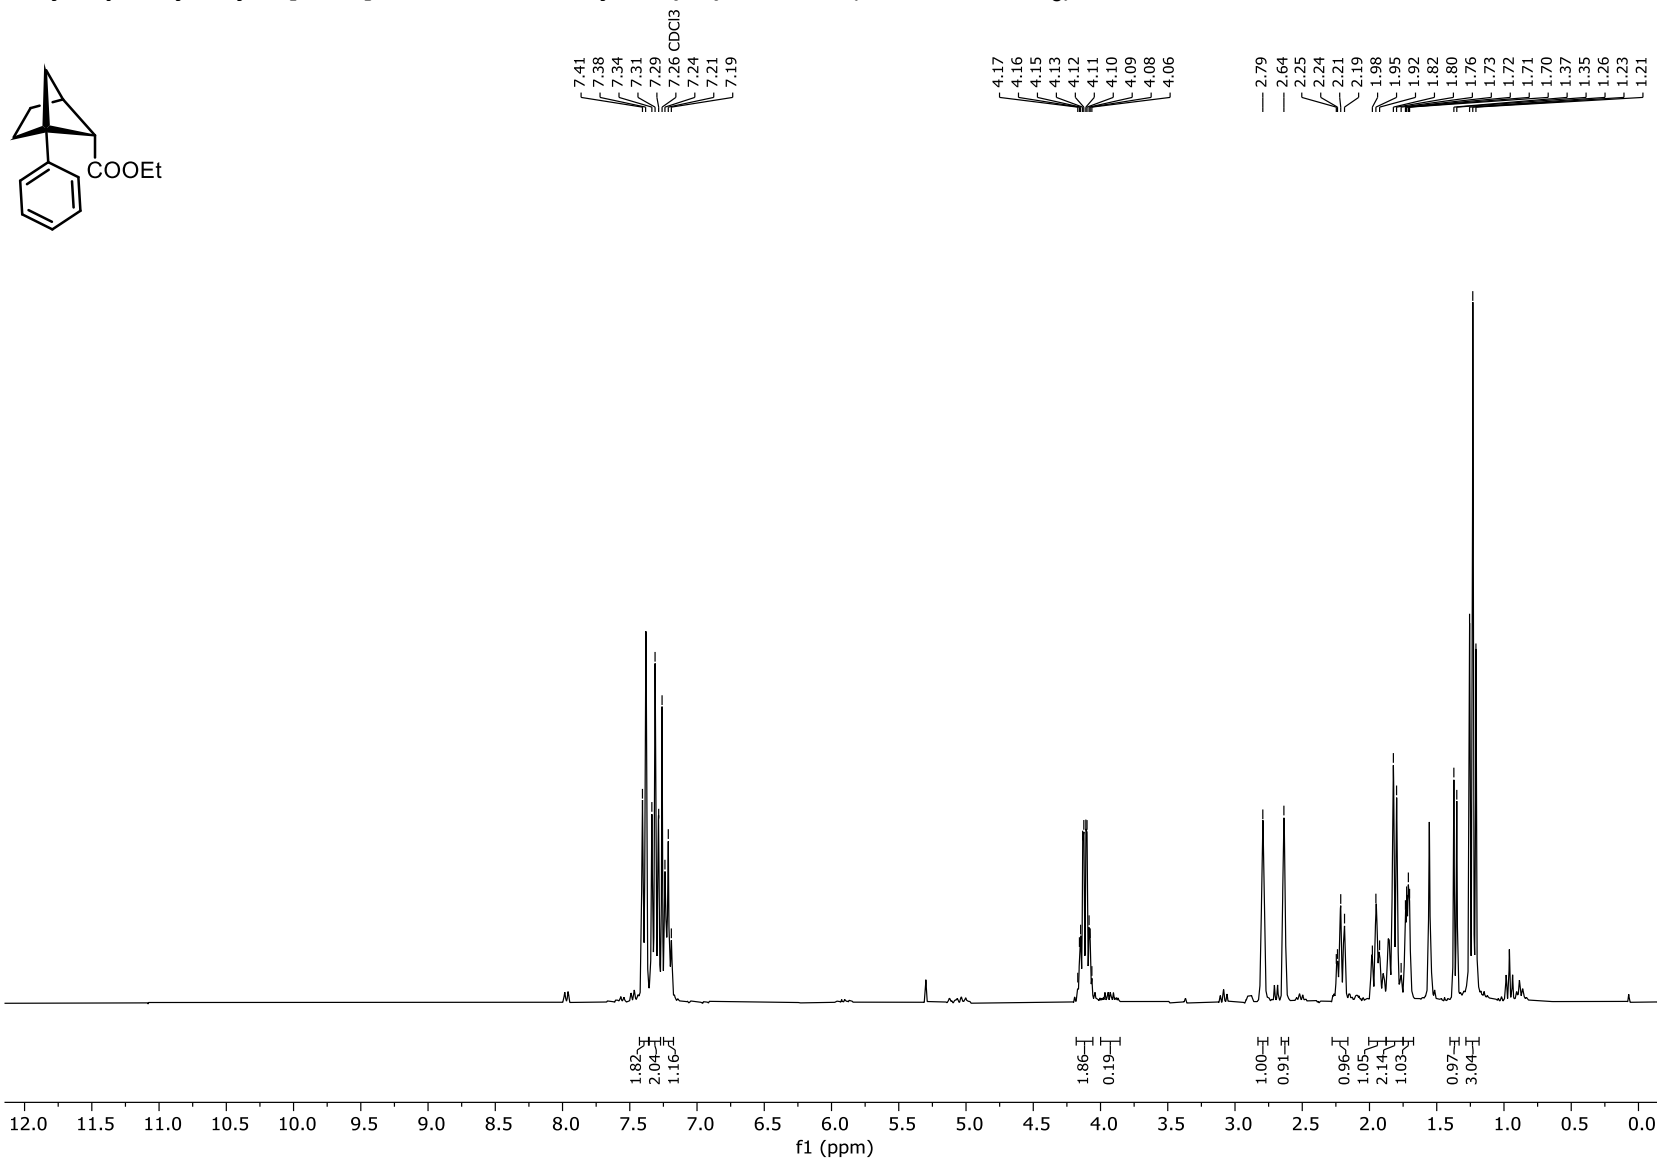

Ethyl 1-phenylbicyclo[2.1.1]hexane-5-carboxylate (**2u**):  $^{13}\text{C}\{^1\text{H}\}$  NMR (101 MHz,  $\text{CDCl}_3$ )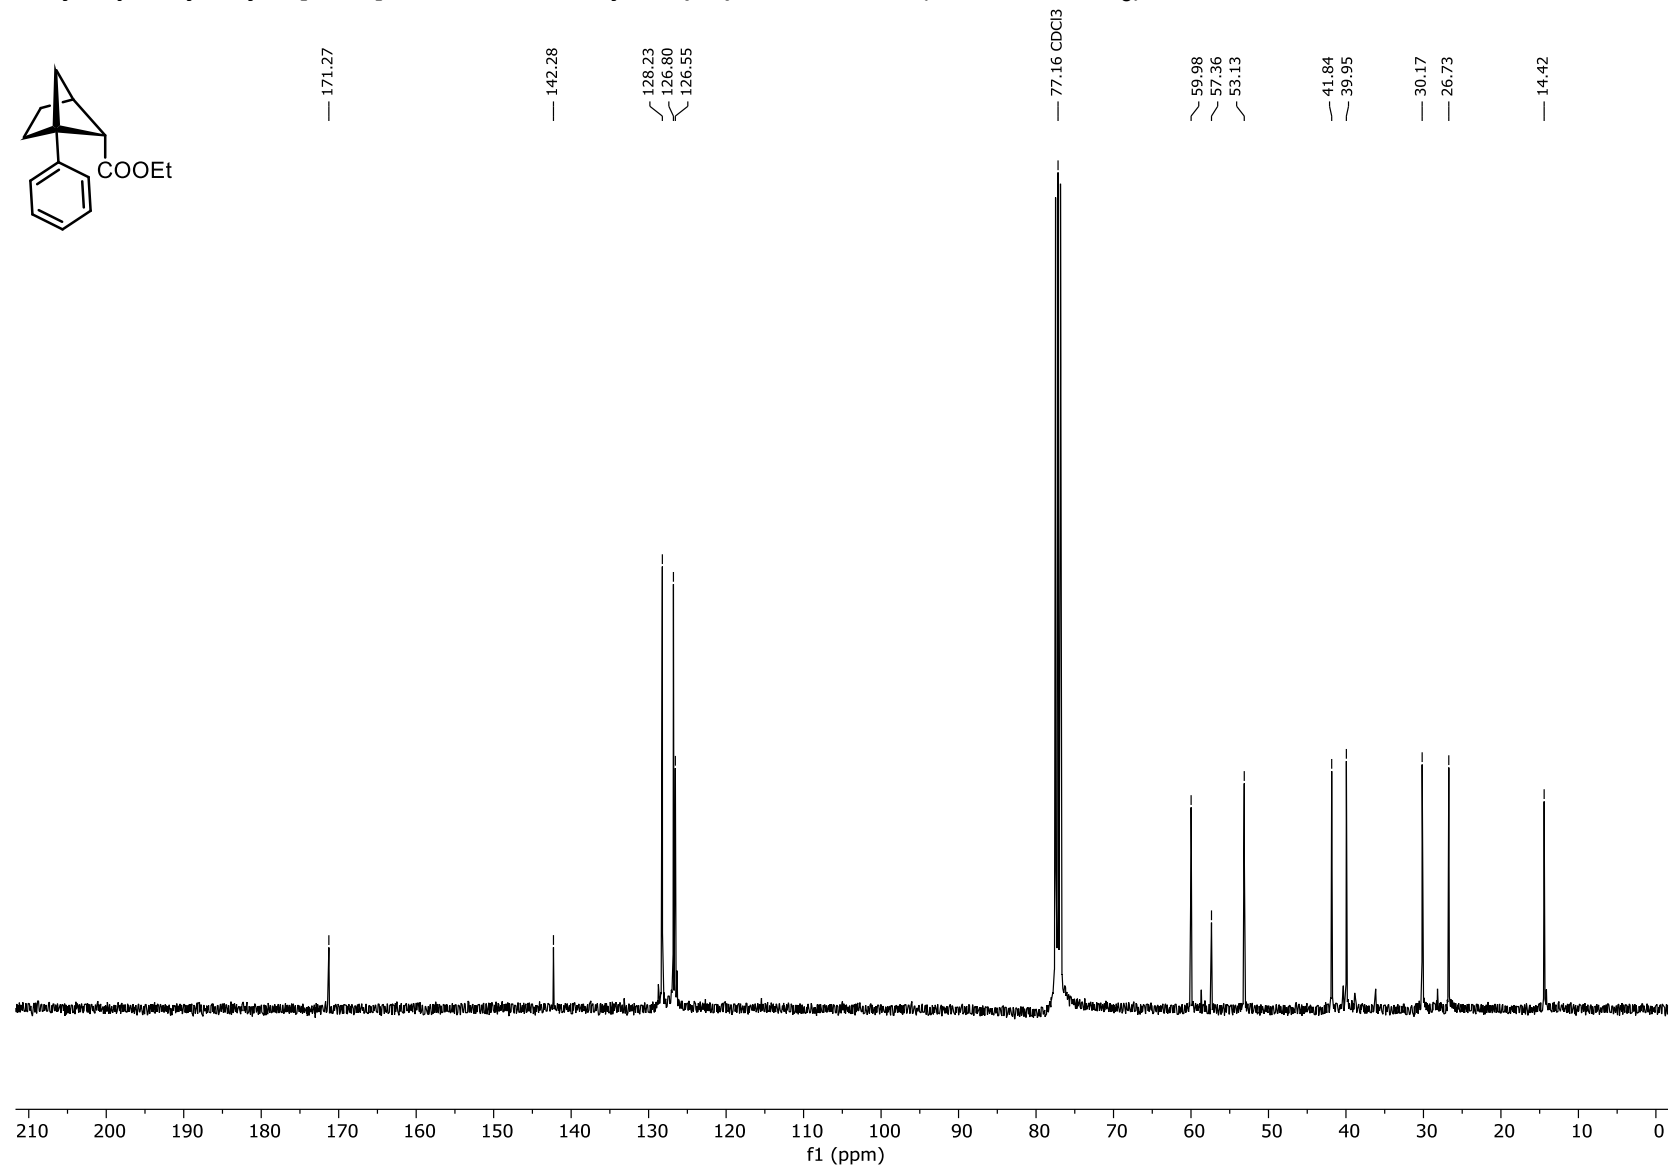

Ethyl 4-methyl-1-phenylbicyclo[2.1.1]hexane-2-carboxylate (**2v**):  $^1\text{H}$  NMR (300 MHz,  $\text{CDCl}_3$ )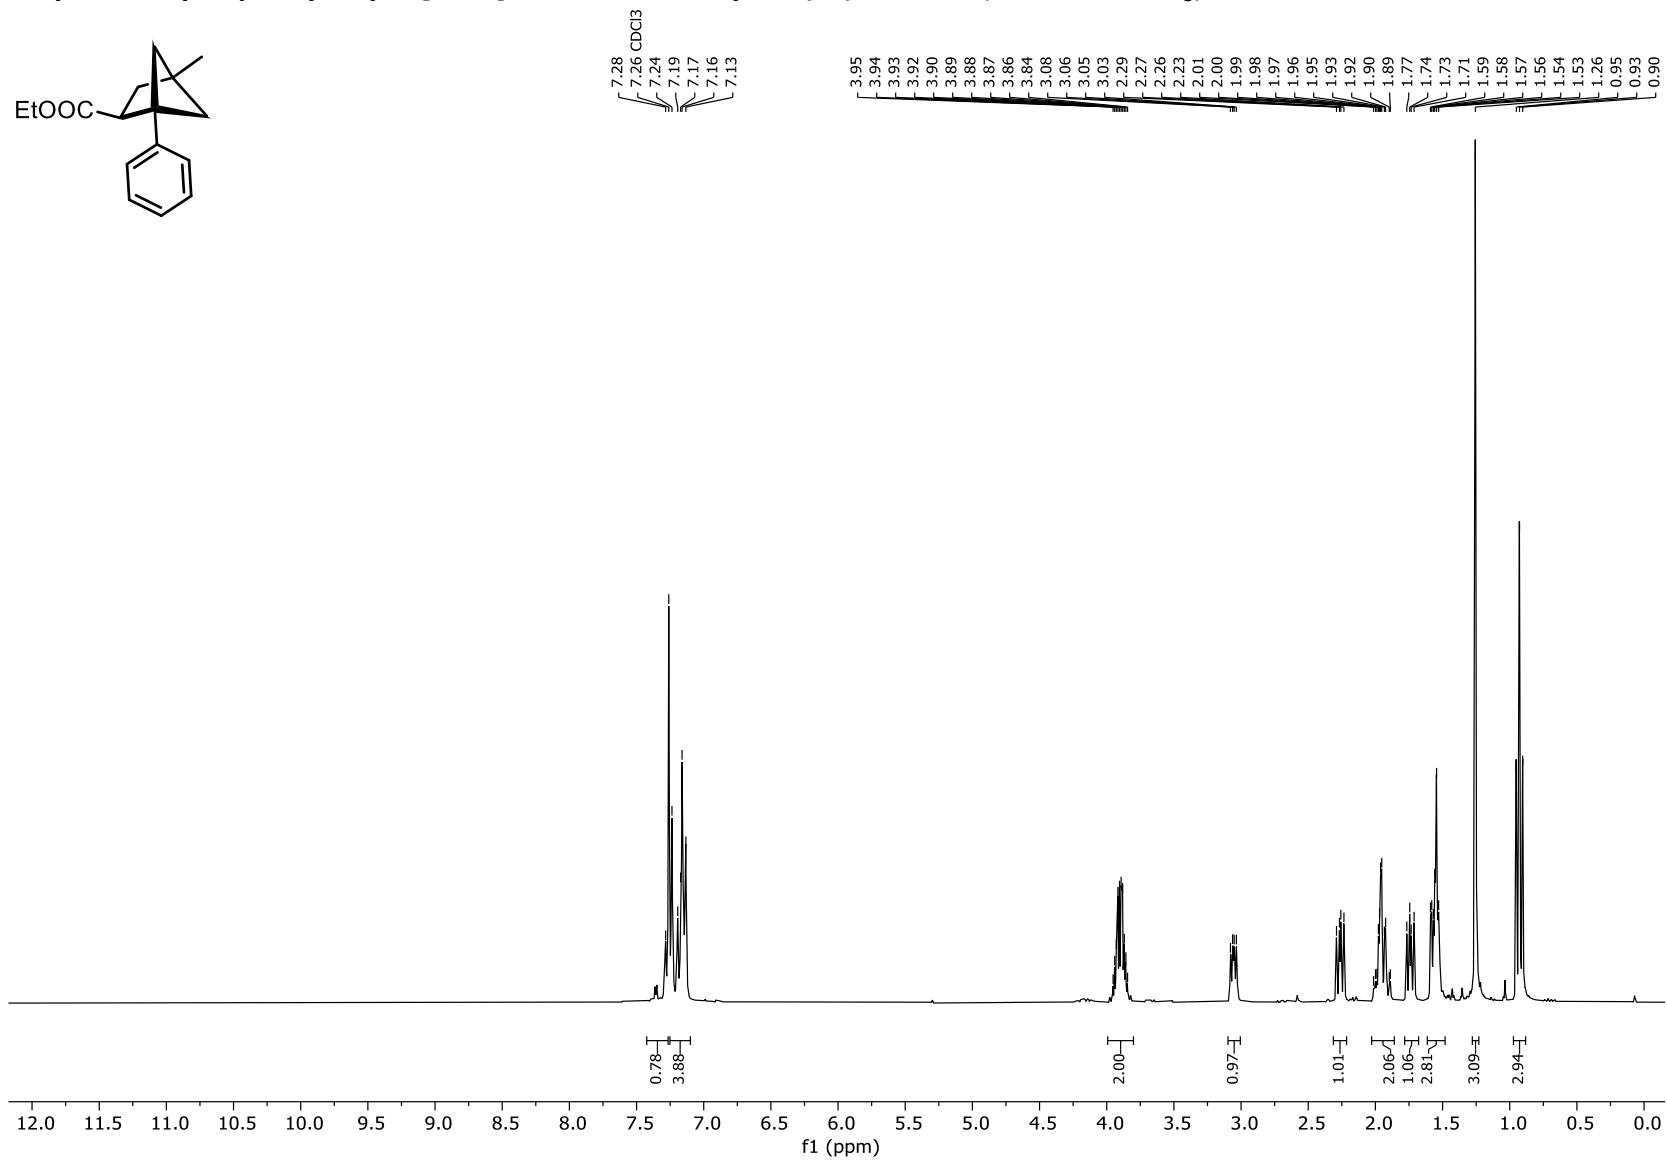

Ethyl 4-methyl-1-phenylbicyclo[2.1.1]hexane-2-carboxylate (**2v**):  $^{13}\text{C}\{^1\text{H}\}$  NMR (101 MHz,  $\text{CDCl}_3$ )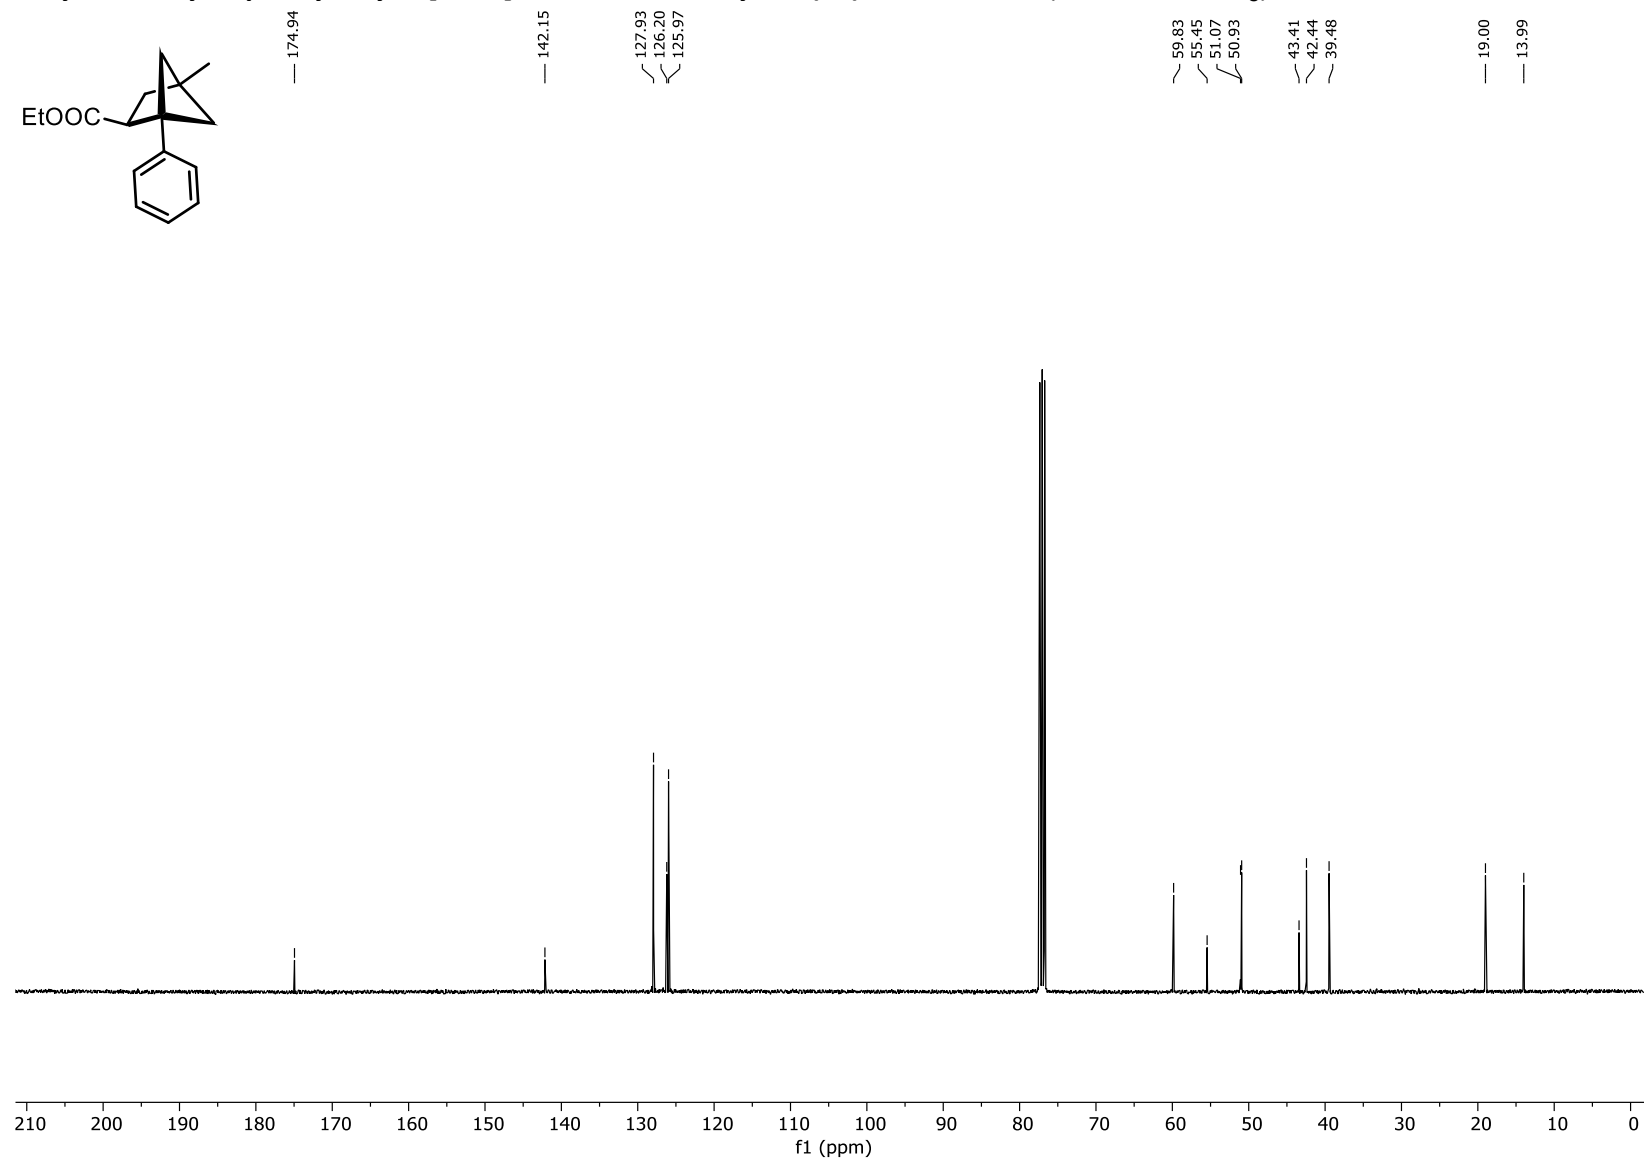

Methyl-3-hydroxy-4-phenylbicyclo[2.1.1]hexane-1-carboxylate (2w):  $^1\text{H}$  NMR (300 MHz,  $\text{CDCl}_3$ )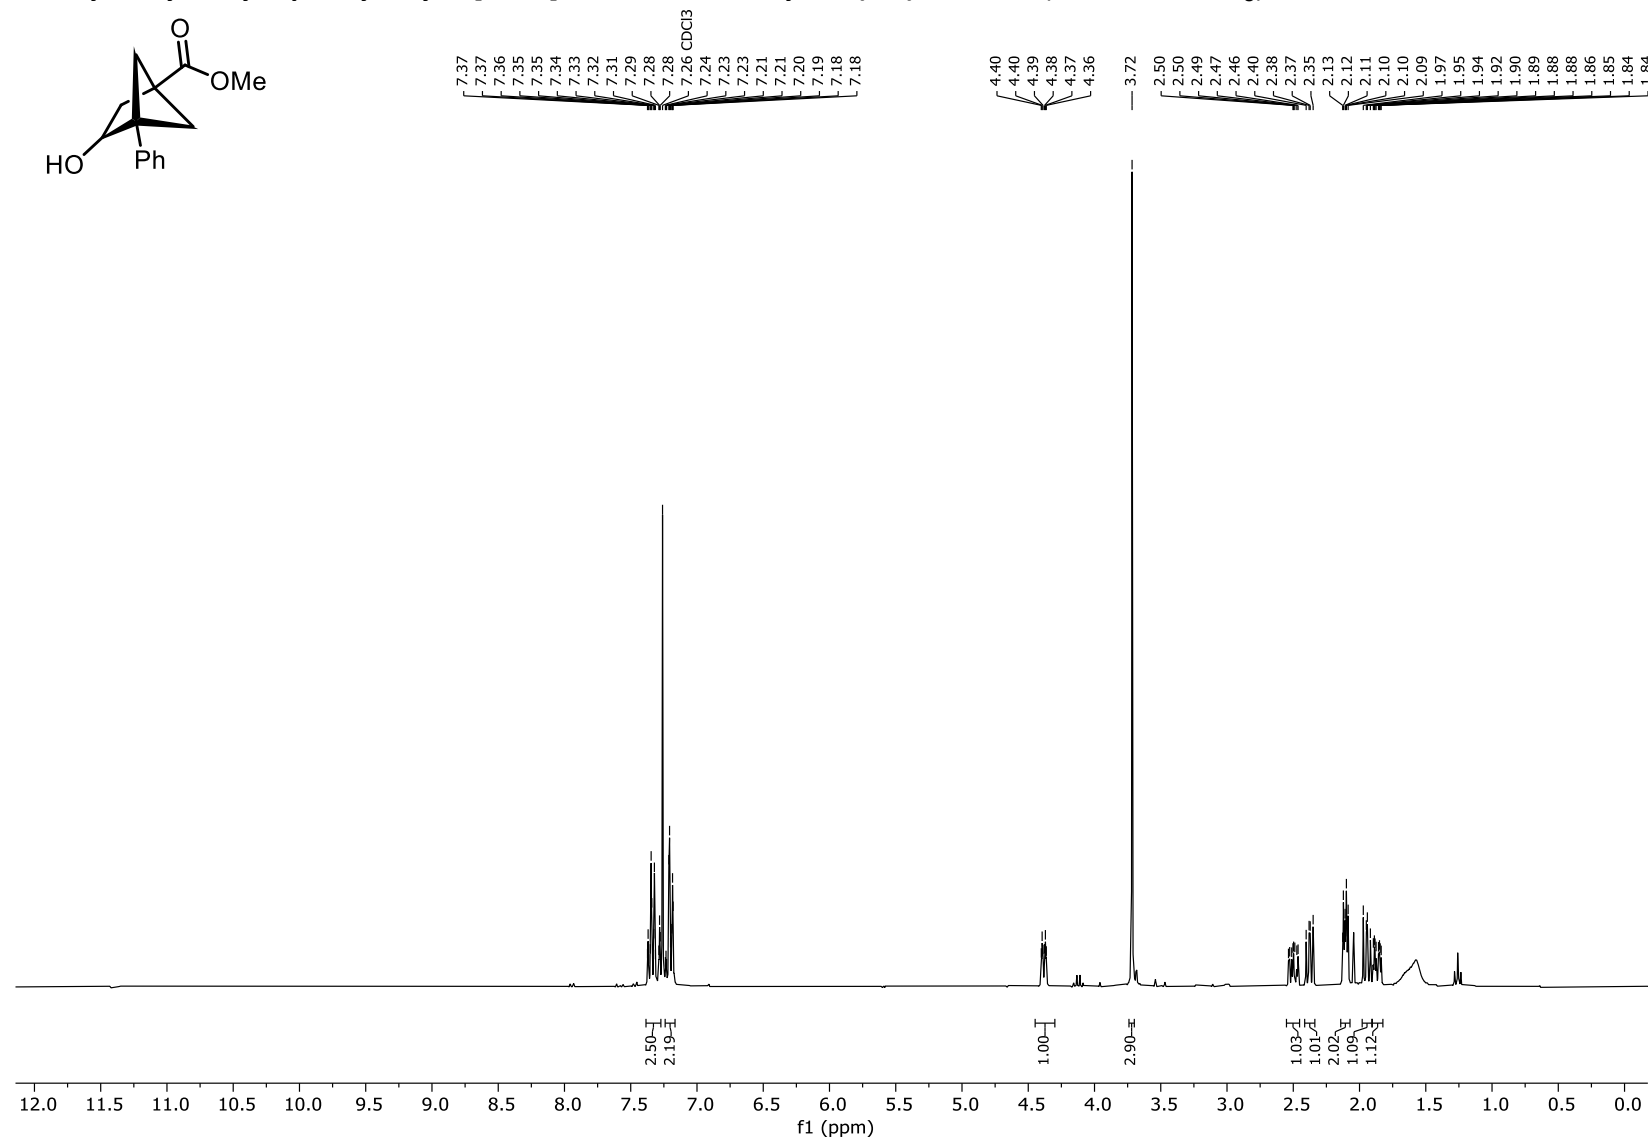



Methyl-3-hydroxy-4-phenylbicyclo[2.1.1]hexane-1-carboxylate (2w):  $^{13}\text{C}\{^1\text{H}\}$  NMR (101 MHz,  $\text{CDCl}_3$ )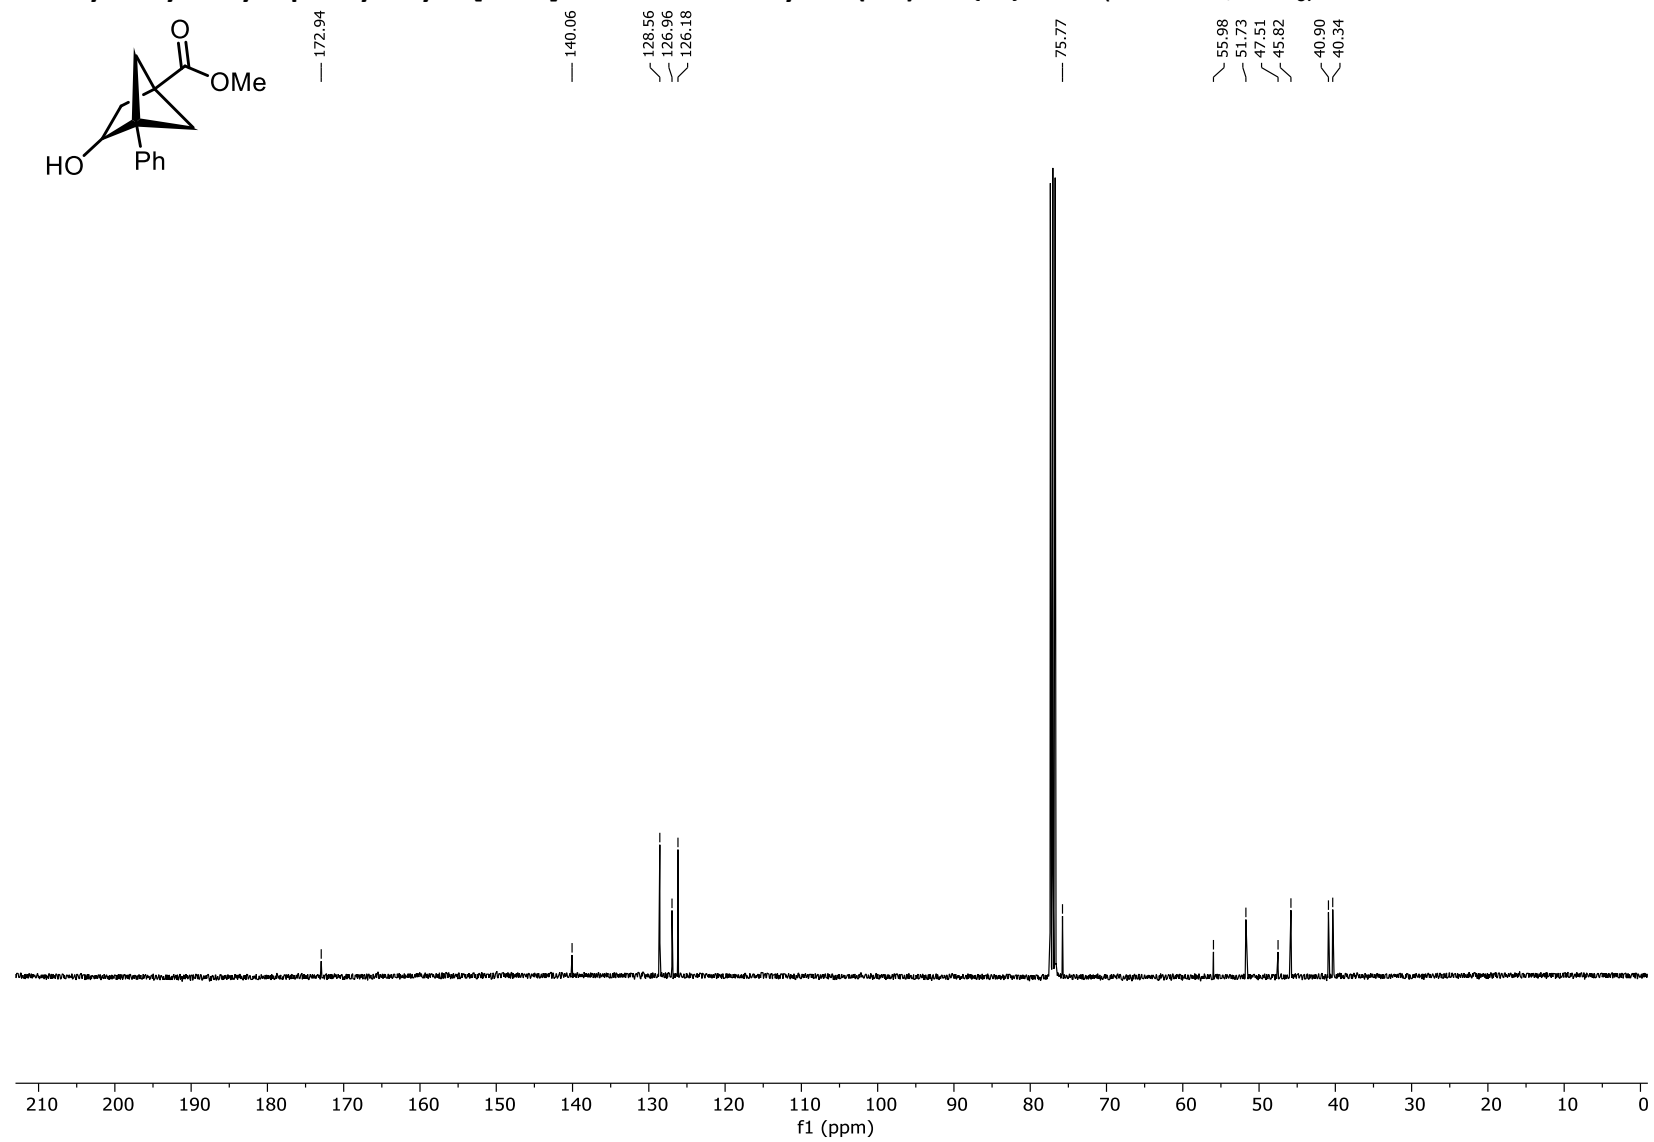

## 3-(1-methyl-4-phenylbicyclo[2.1.1]hexan-2-yl)pyridine (2x):

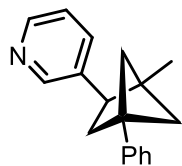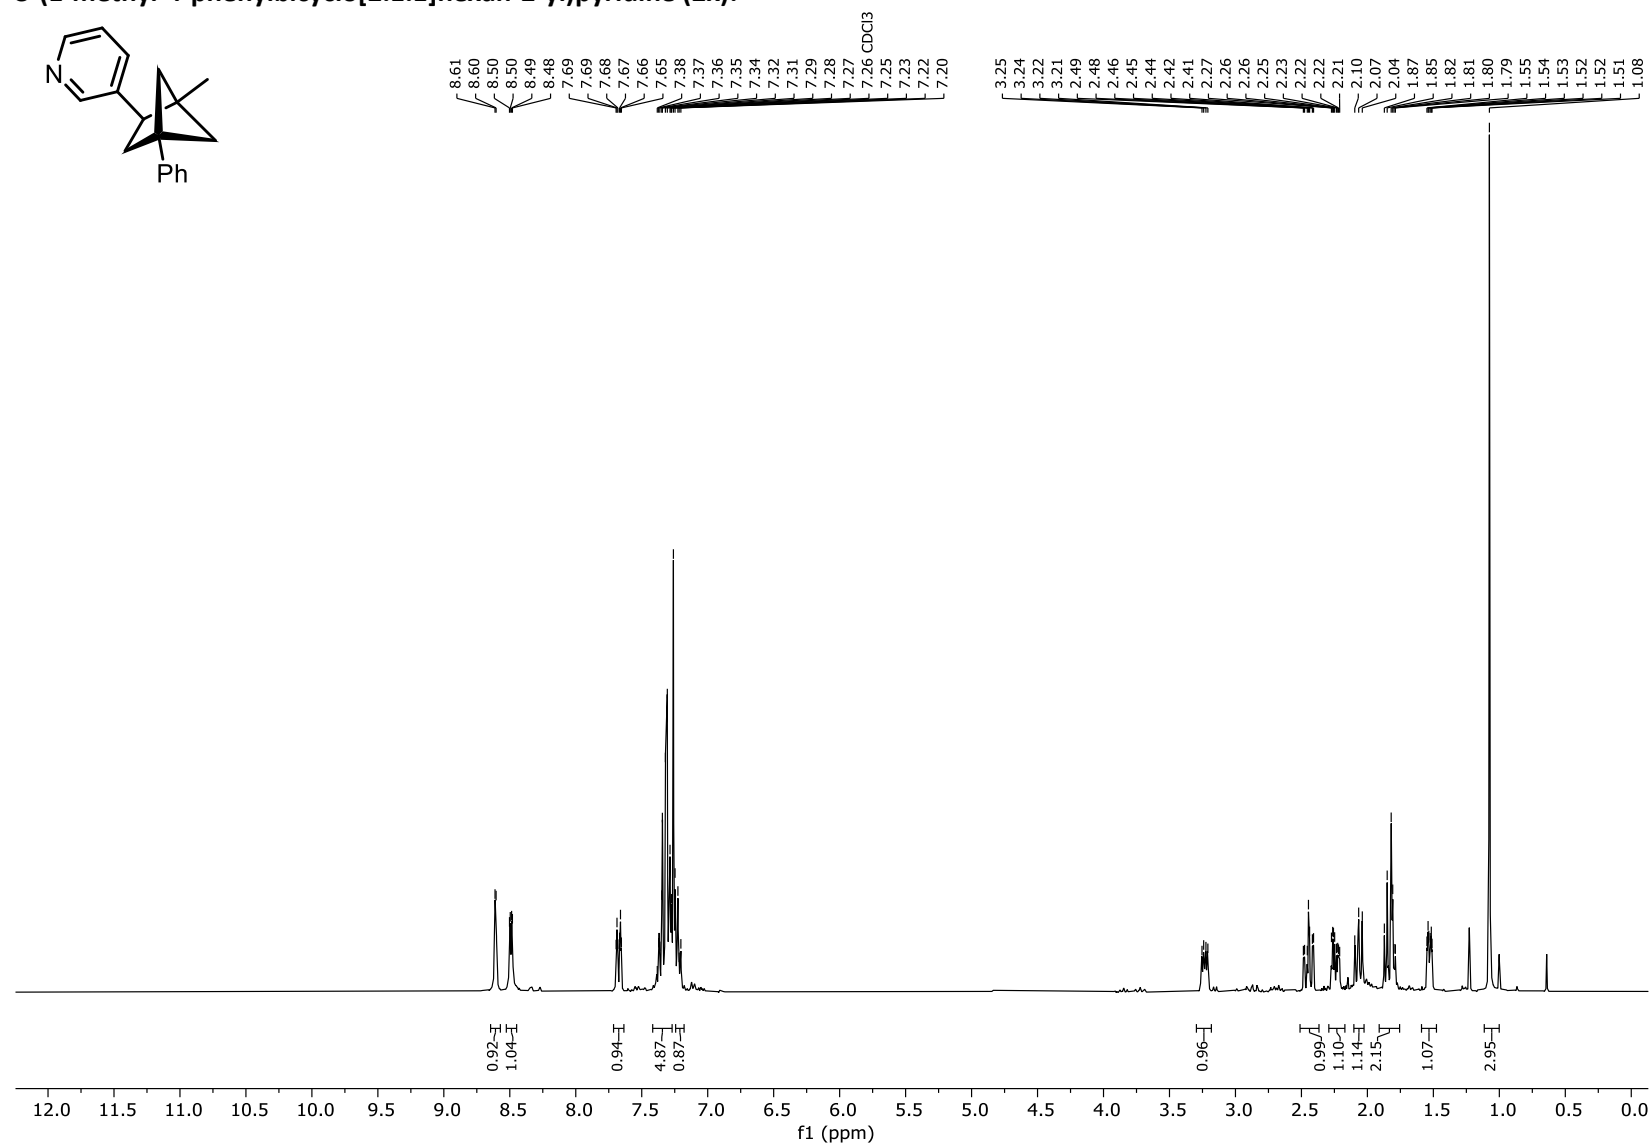

## 3-(1-methyl-4-phenylbicyclo[2.1.1]hexan-2-yl)pyridine (2x):

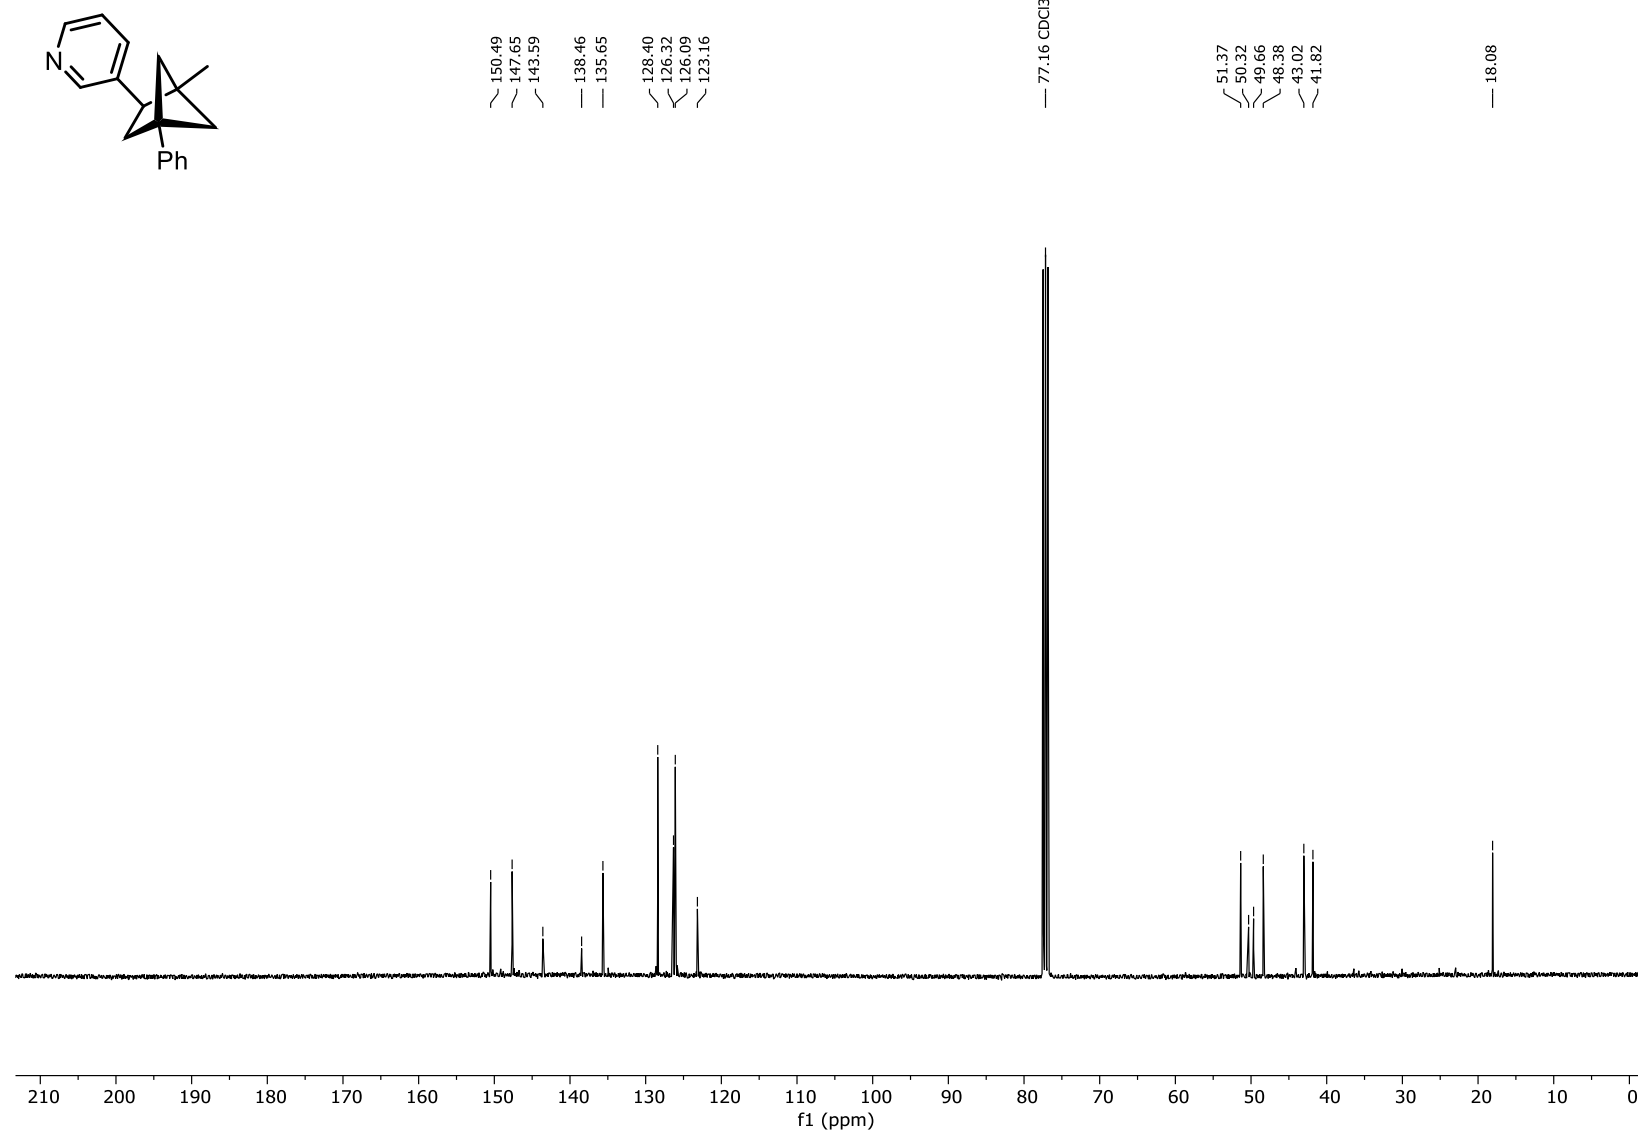

1-Phenylspiro[bicyclo[2.1.1]hexane-2,1'-cyclopentane] (2y):  $^1\text{H}$  NMR (300 MHz,  $\text{CDCl}_3$ )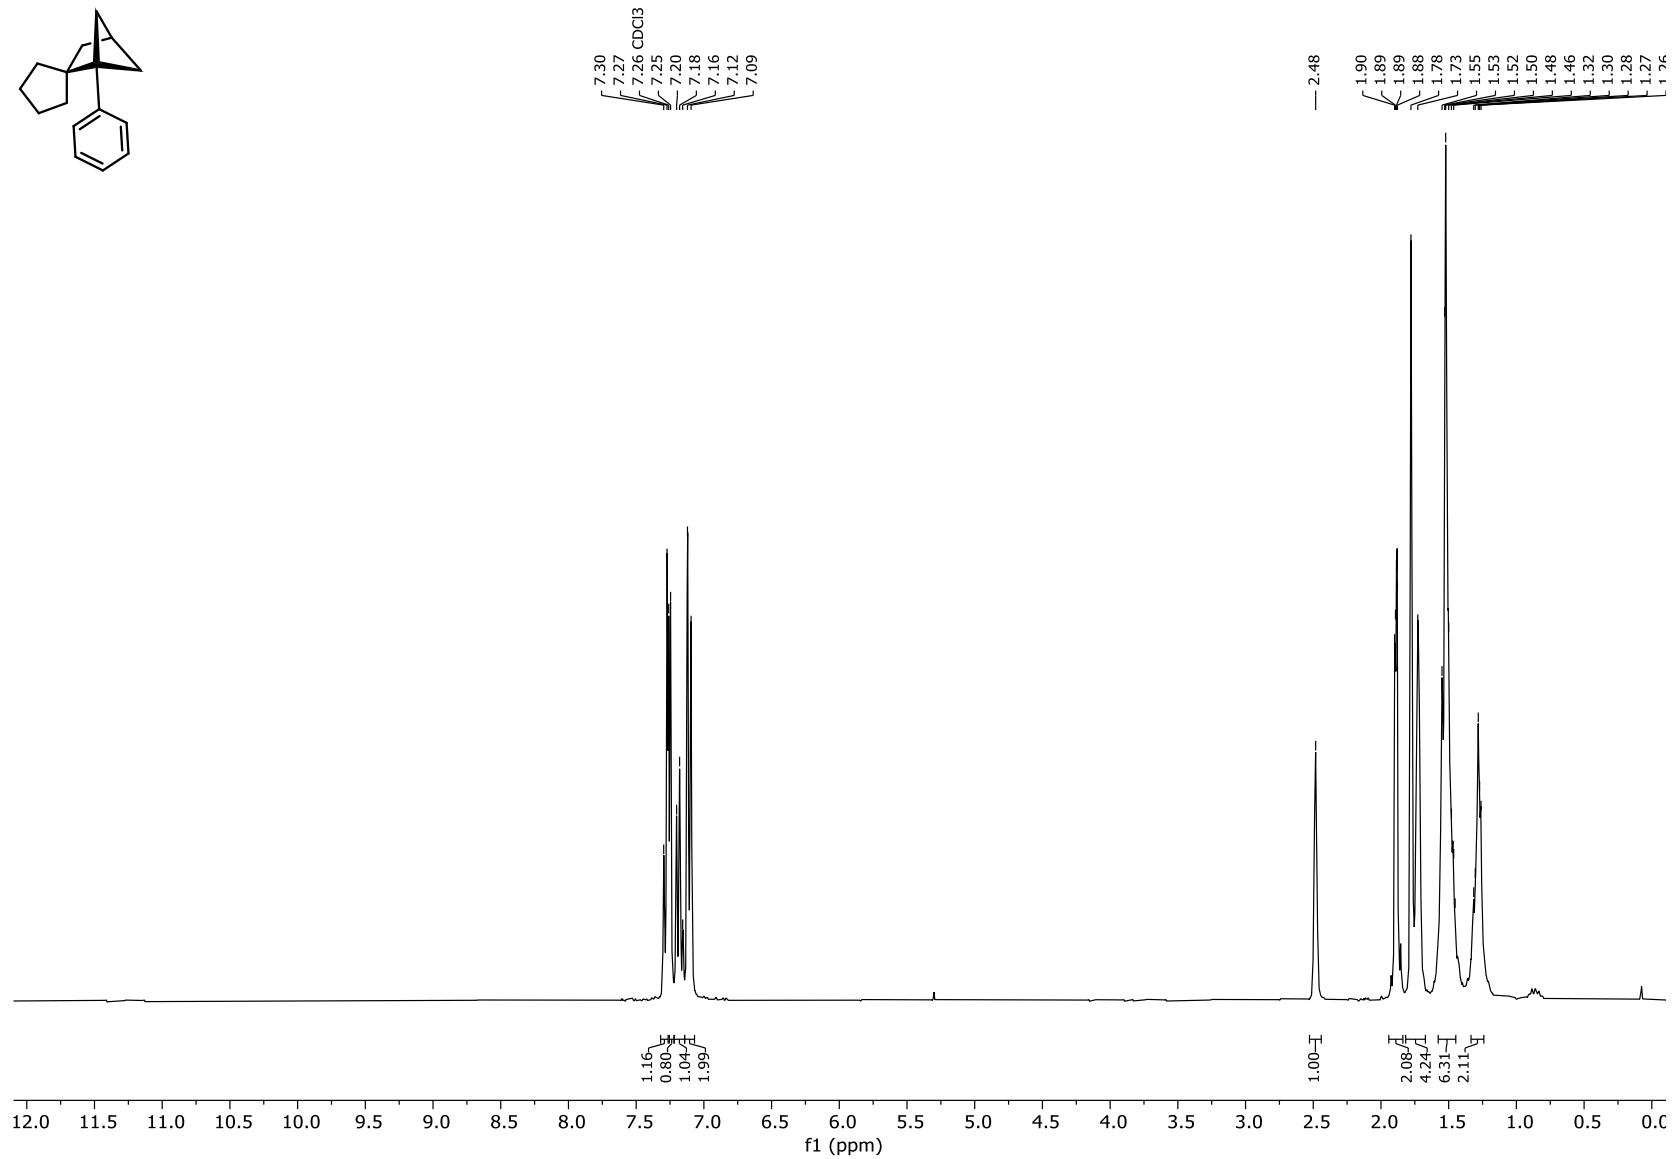

**1-Phenylspiro[bicyclo[2.1.1]hexane-2,1'-cyclopentane] (2y):**  $^{13}\text{C}\{^1\text{H}\}$  NMR (101 MHz,  $\text{CDCl}_3$ )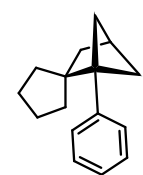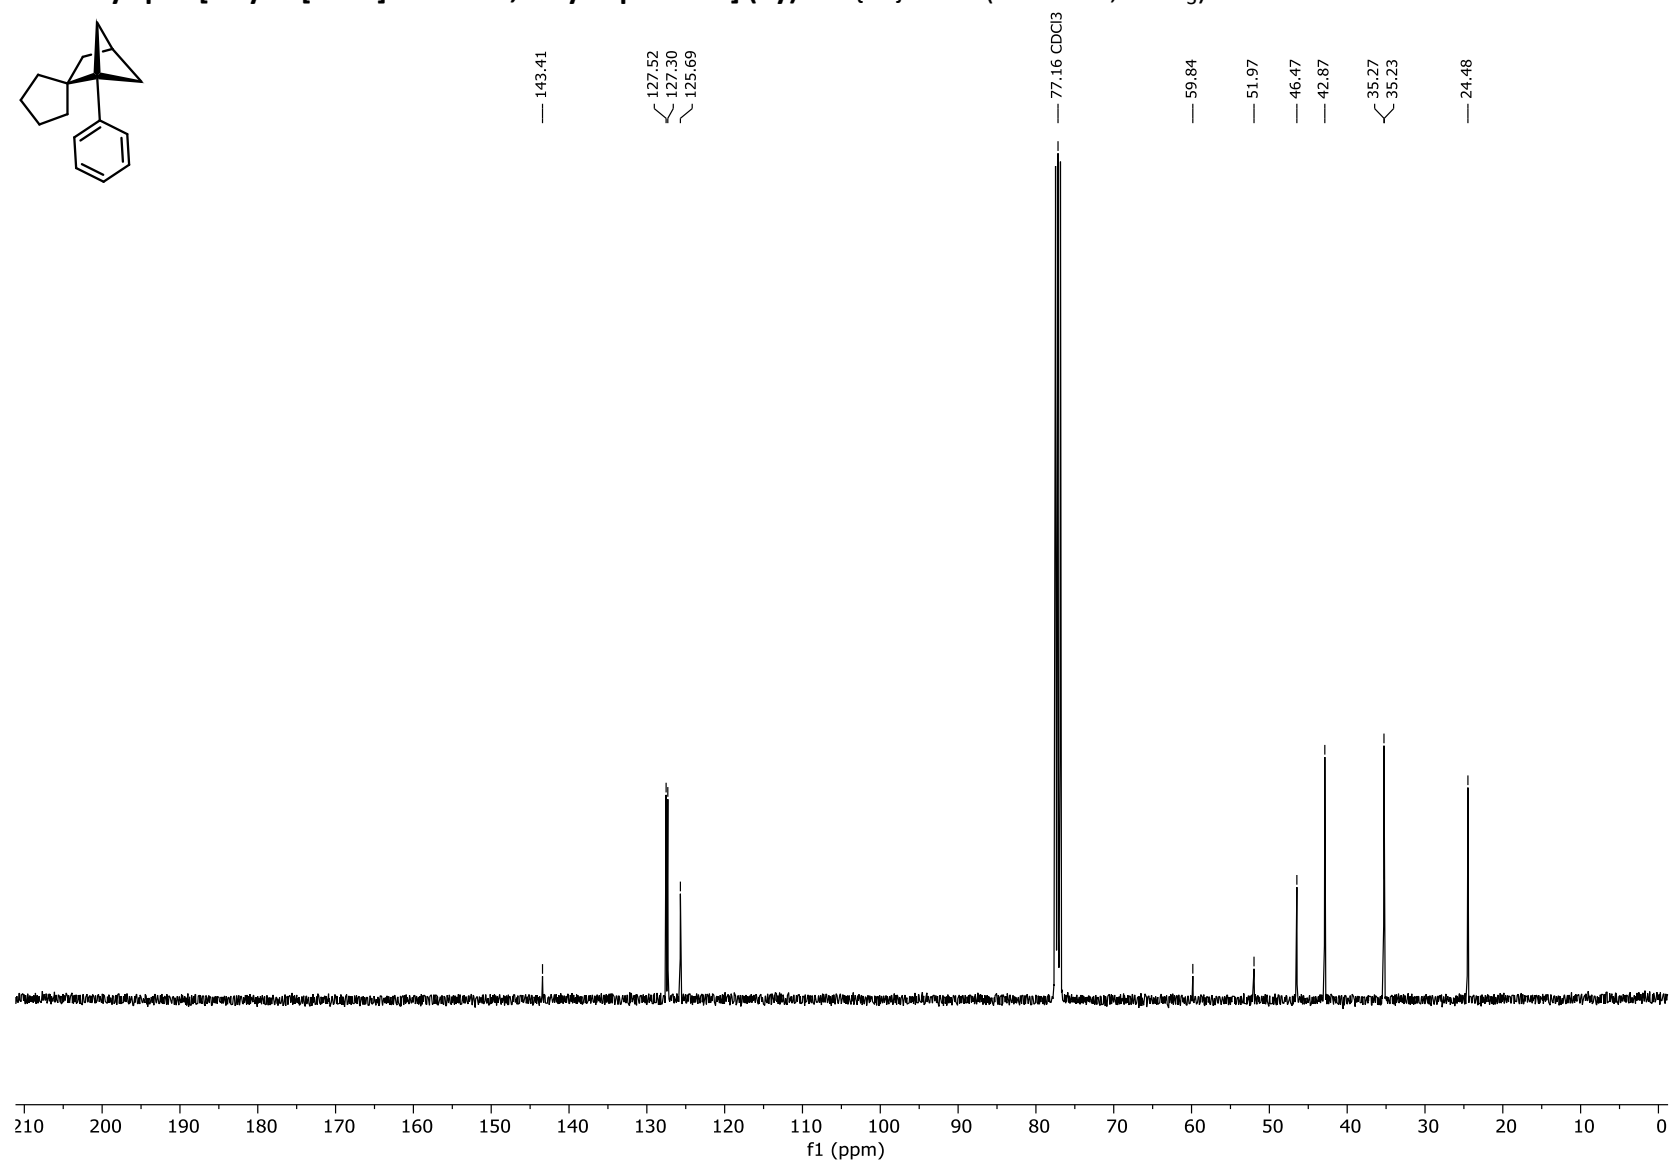

5-Ethyl 1-methyl-4-phenylbicyclo[2.1.1]hexane-1,5-dicarboxylate (**2z**):  $^1\text{H}$  NMR (300 MHz,  $\text{CDCl}_3$ )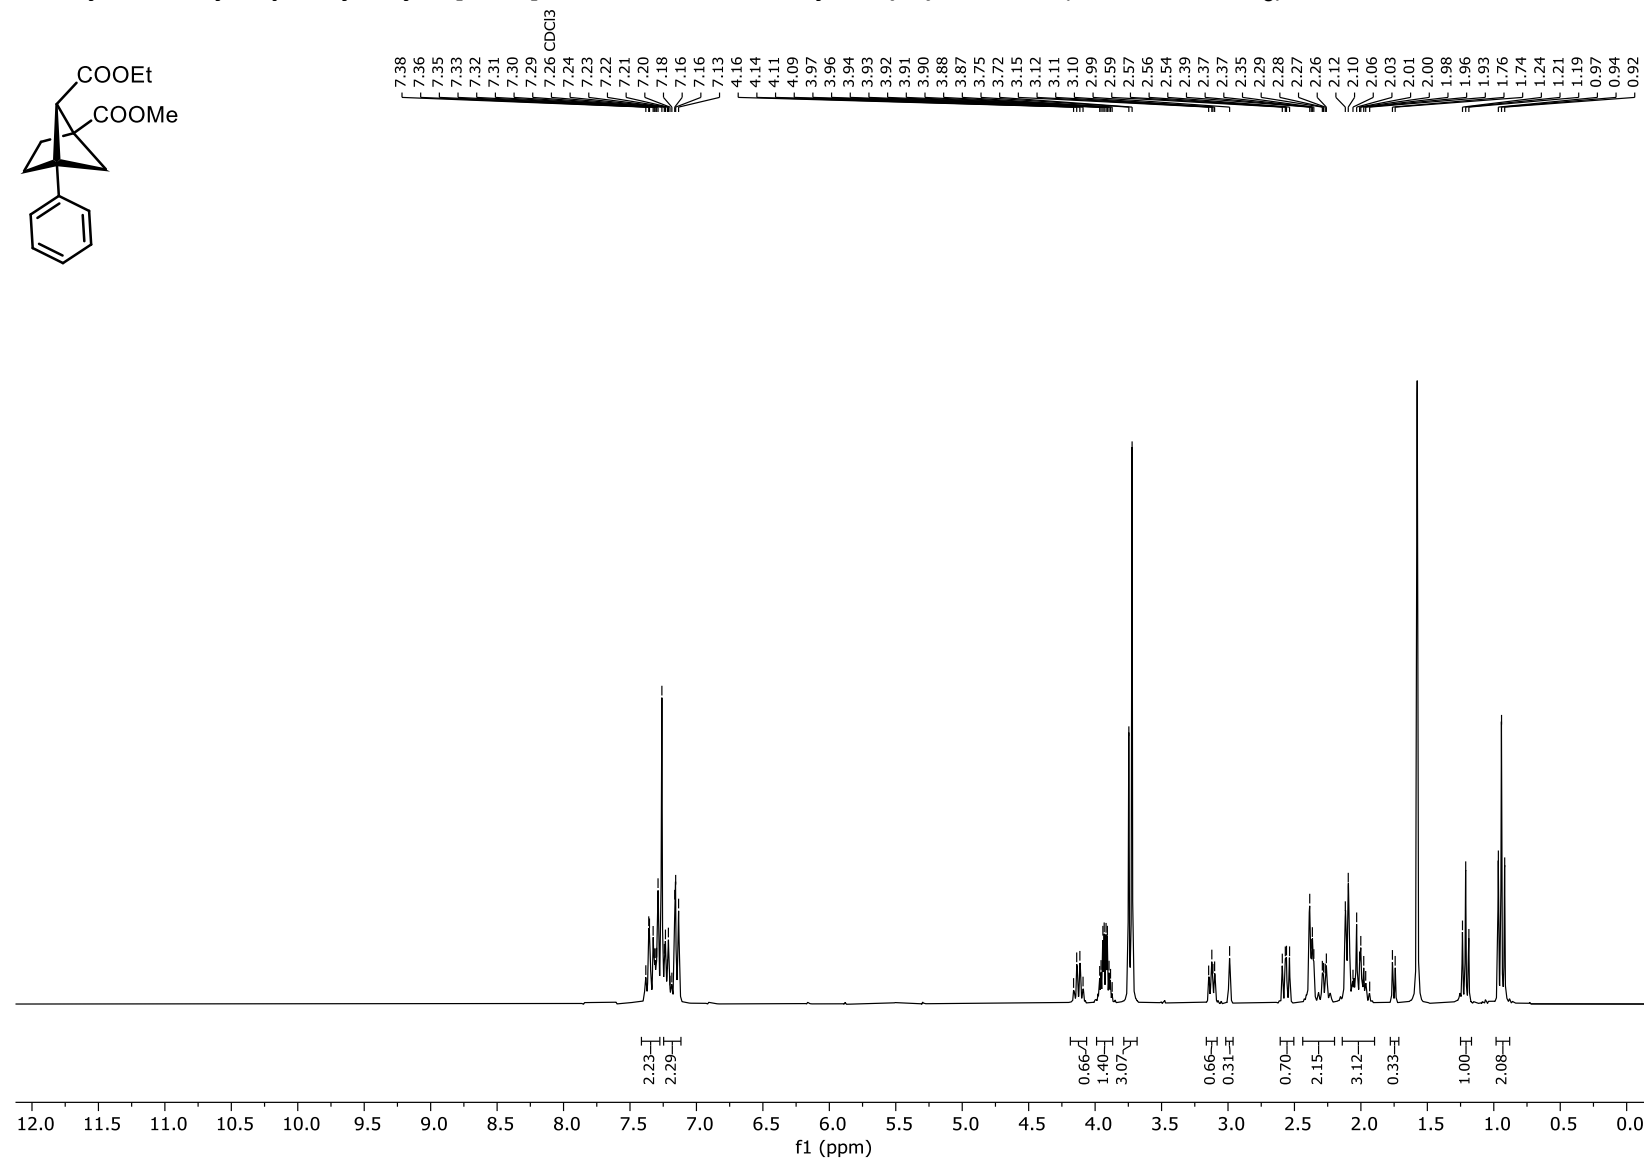

5-Ethyl 1-methyl-4-phenylbicyclo[2.1.1]hexane-1,5-dicarboxylate (**2z**):  $^{13}\text{C}\{^1\text{H}\}$  NMR (101 MHz,  $\text{CDCl}_3$ )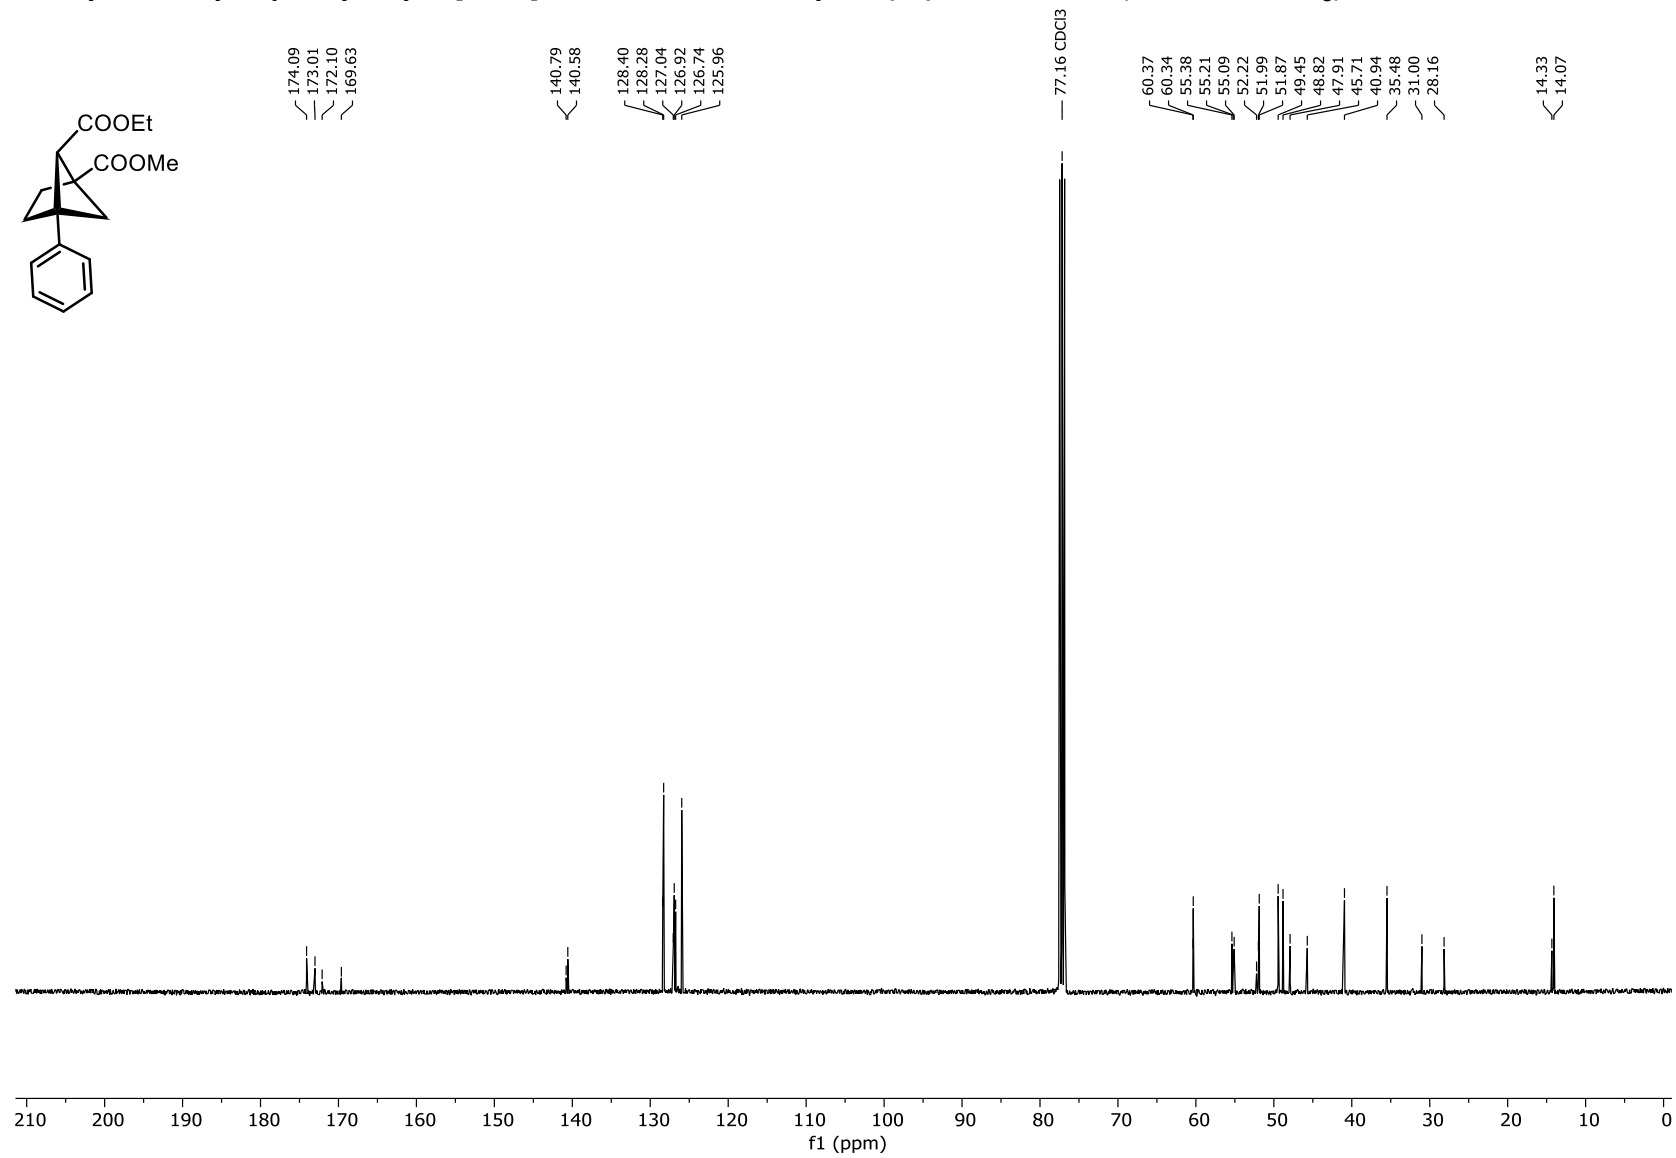

5-Ethyl 1-methyl-4-phenylbicyclo[2.1.1]hexane-1,5-dicarboxylate (**2z**): NOESY (400 MHz, CDCl<sub>3</sub>)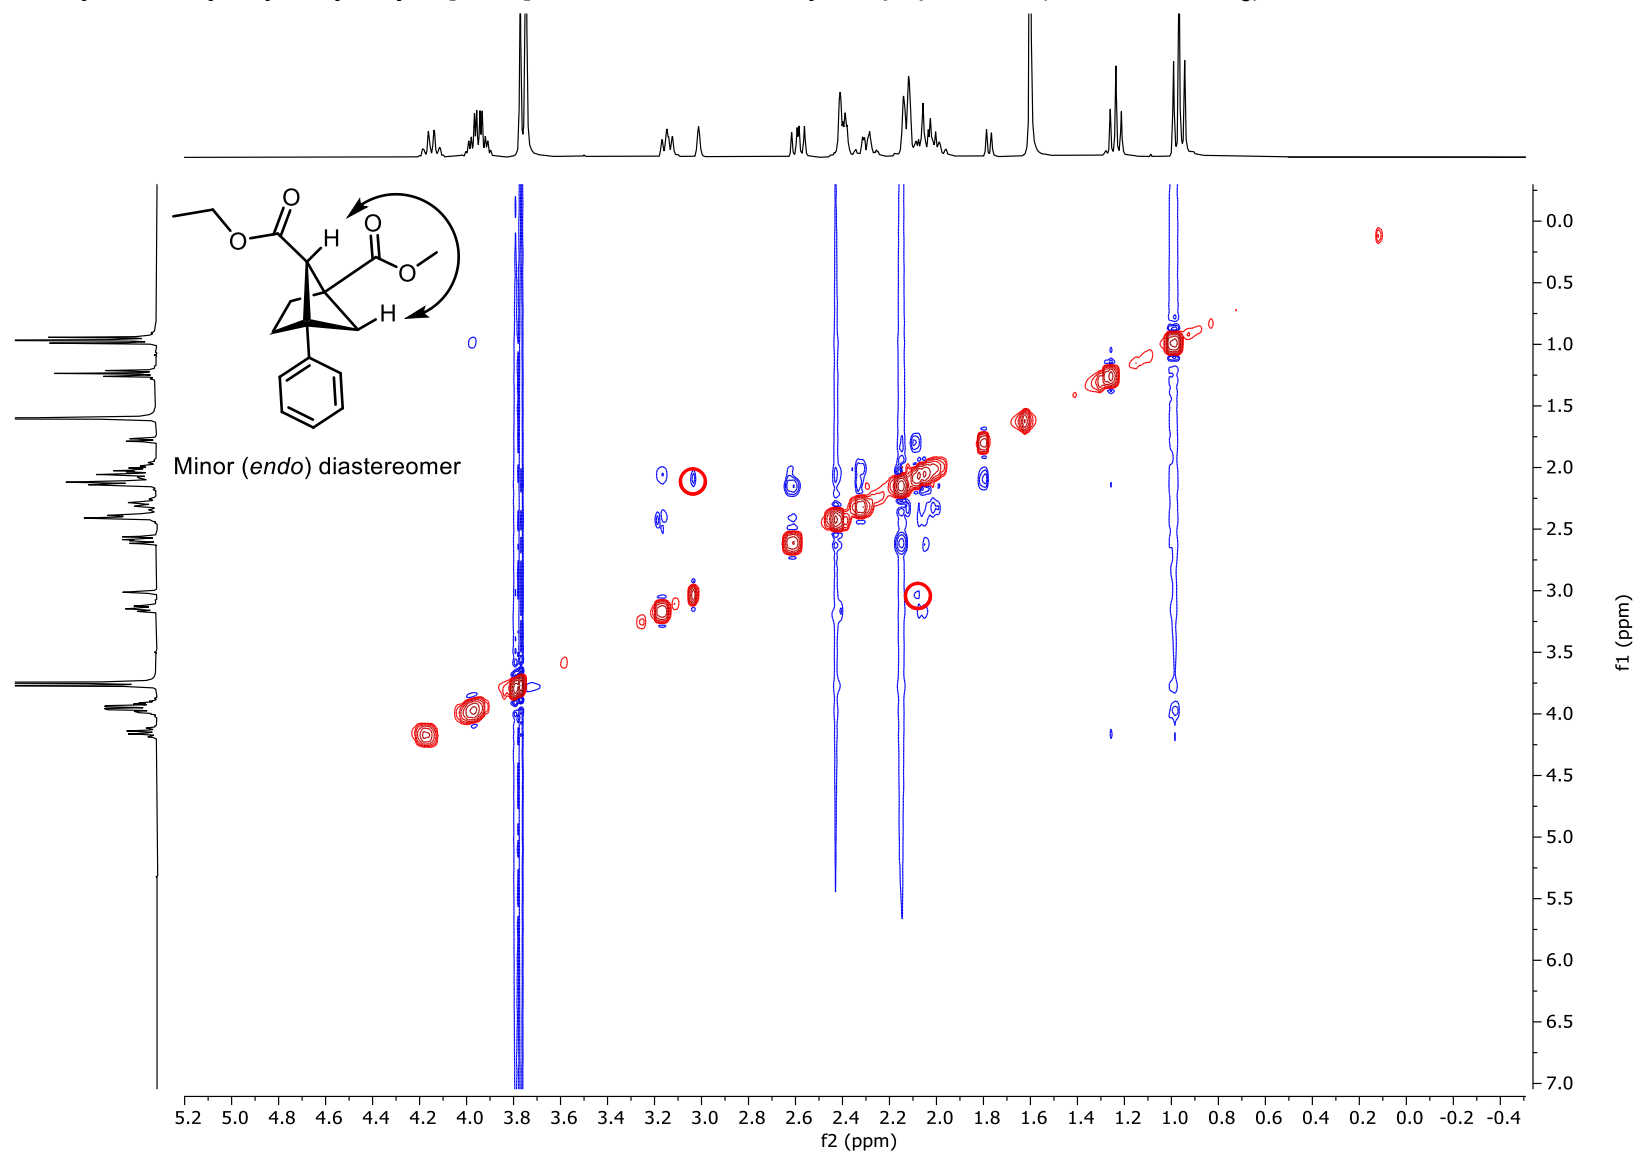



Methyl-3-hydroxy-5-methyl-4-phenylbicyclo[2.1.1]hexane-1-carboxylate (2a):  $^1\text{H}$  NMR (300 MHz,  $\text{CDCl}_3$ )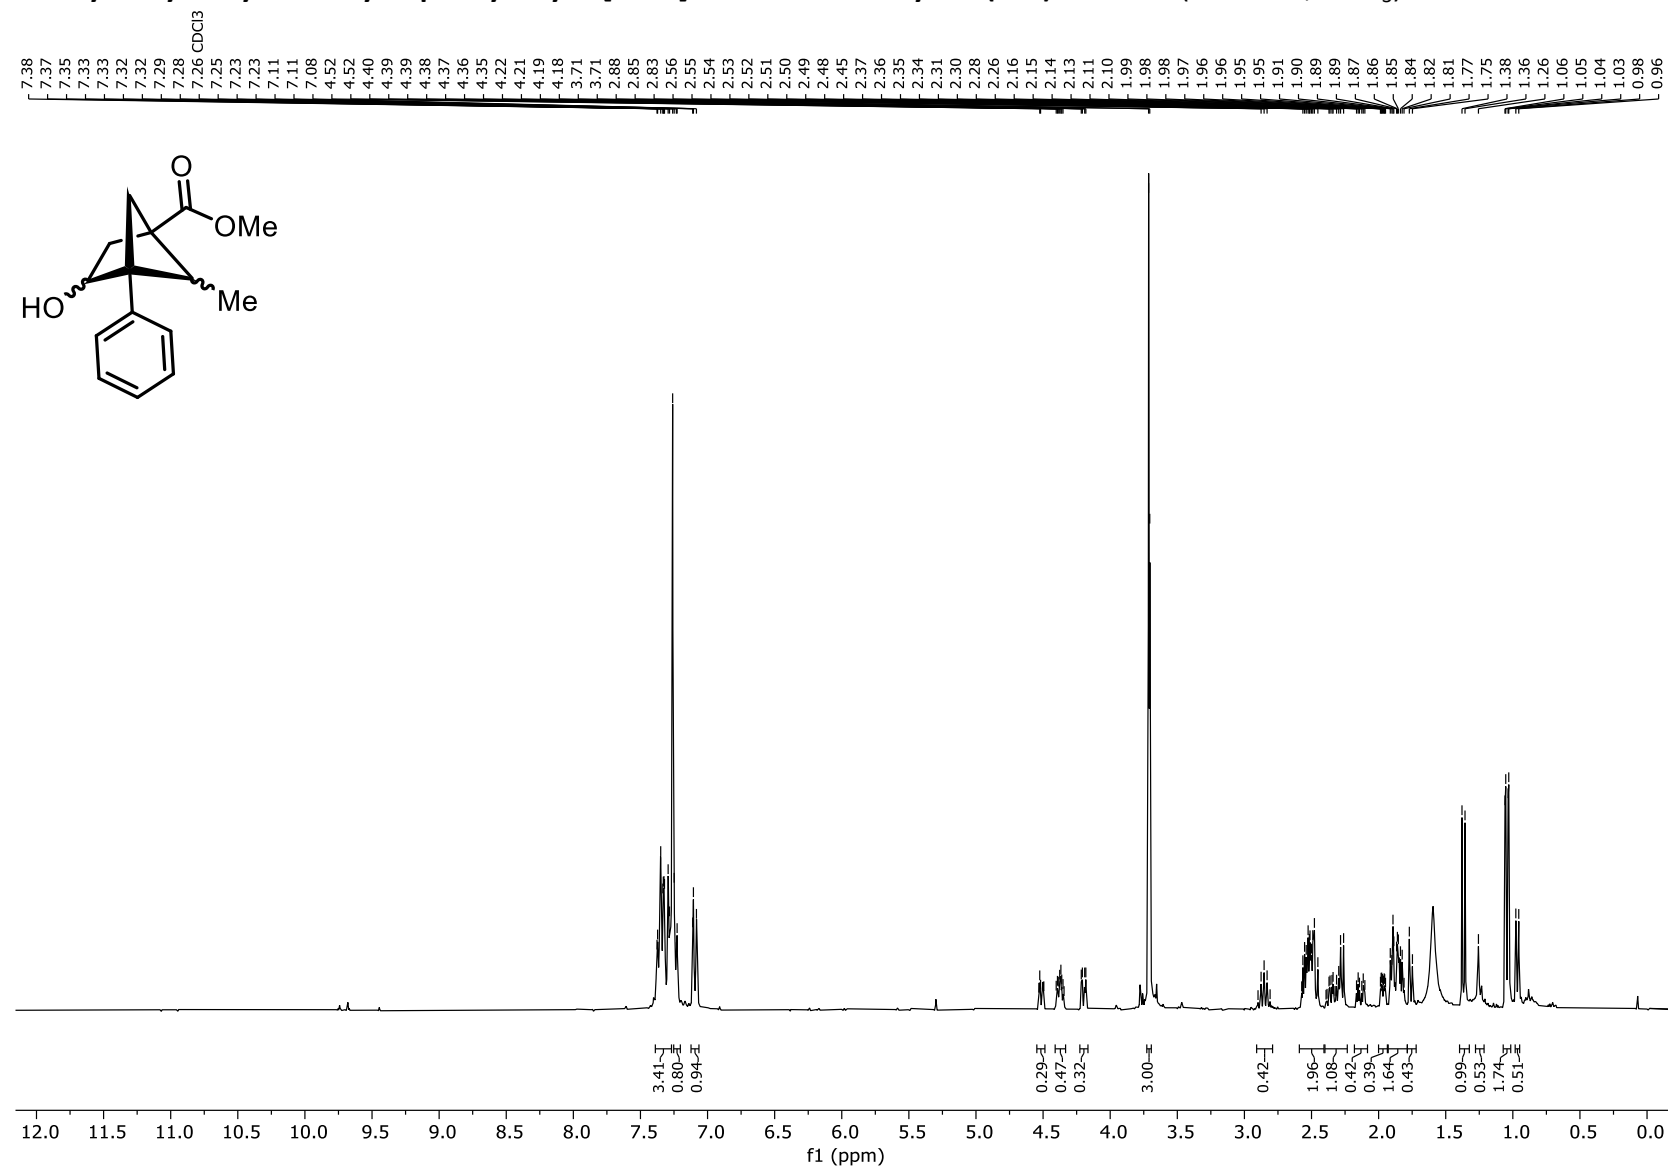

Methyl 3-hydroxy-5-methyl-4-phenylbicyclo[2.1.1]hexane-1-carboxylate (2aa):  $^{13}\text{C}\{^1\text{H}\}$  NMR (101 MHz,  $\text{CDCl}_3$ )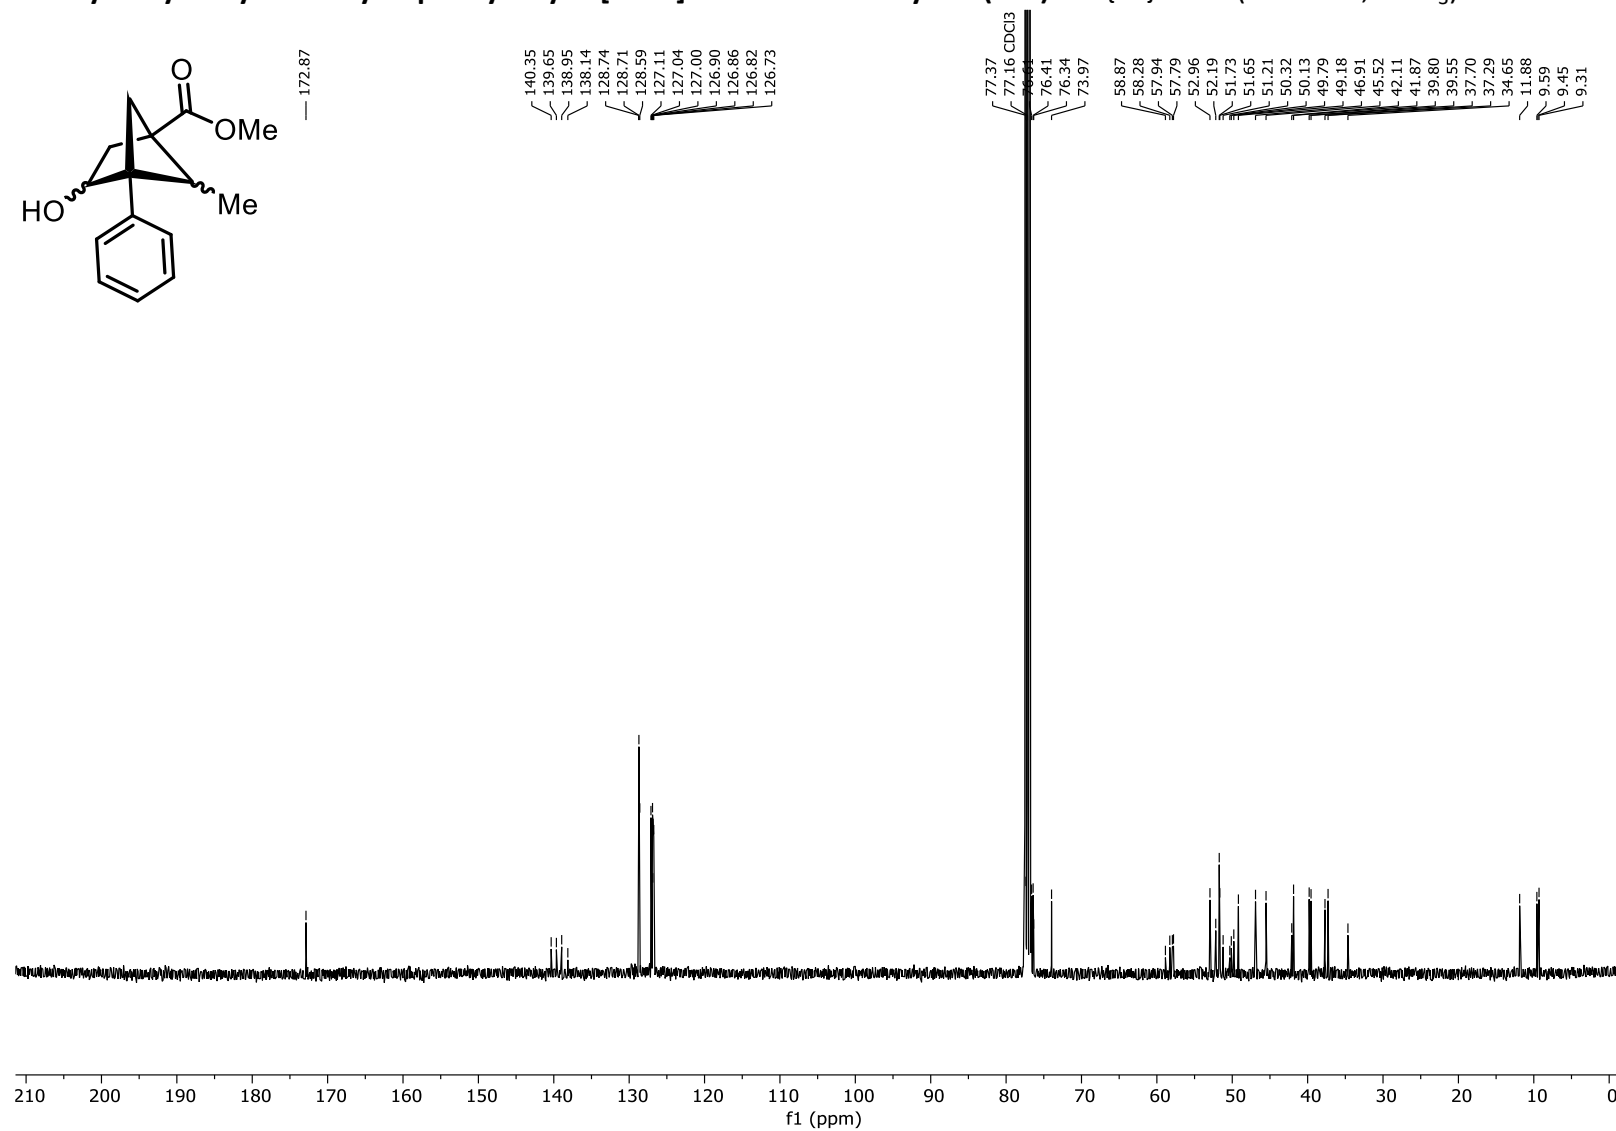

Methyl 2-*exo*-hydroxy-5-*exo*-methyl-4-phenylbicyclo[2.1.1]hexane-1-carboxylate (2aa):  $^1\text{H}$  NMR (300 MHz,  $\text{CDCl}_3$ )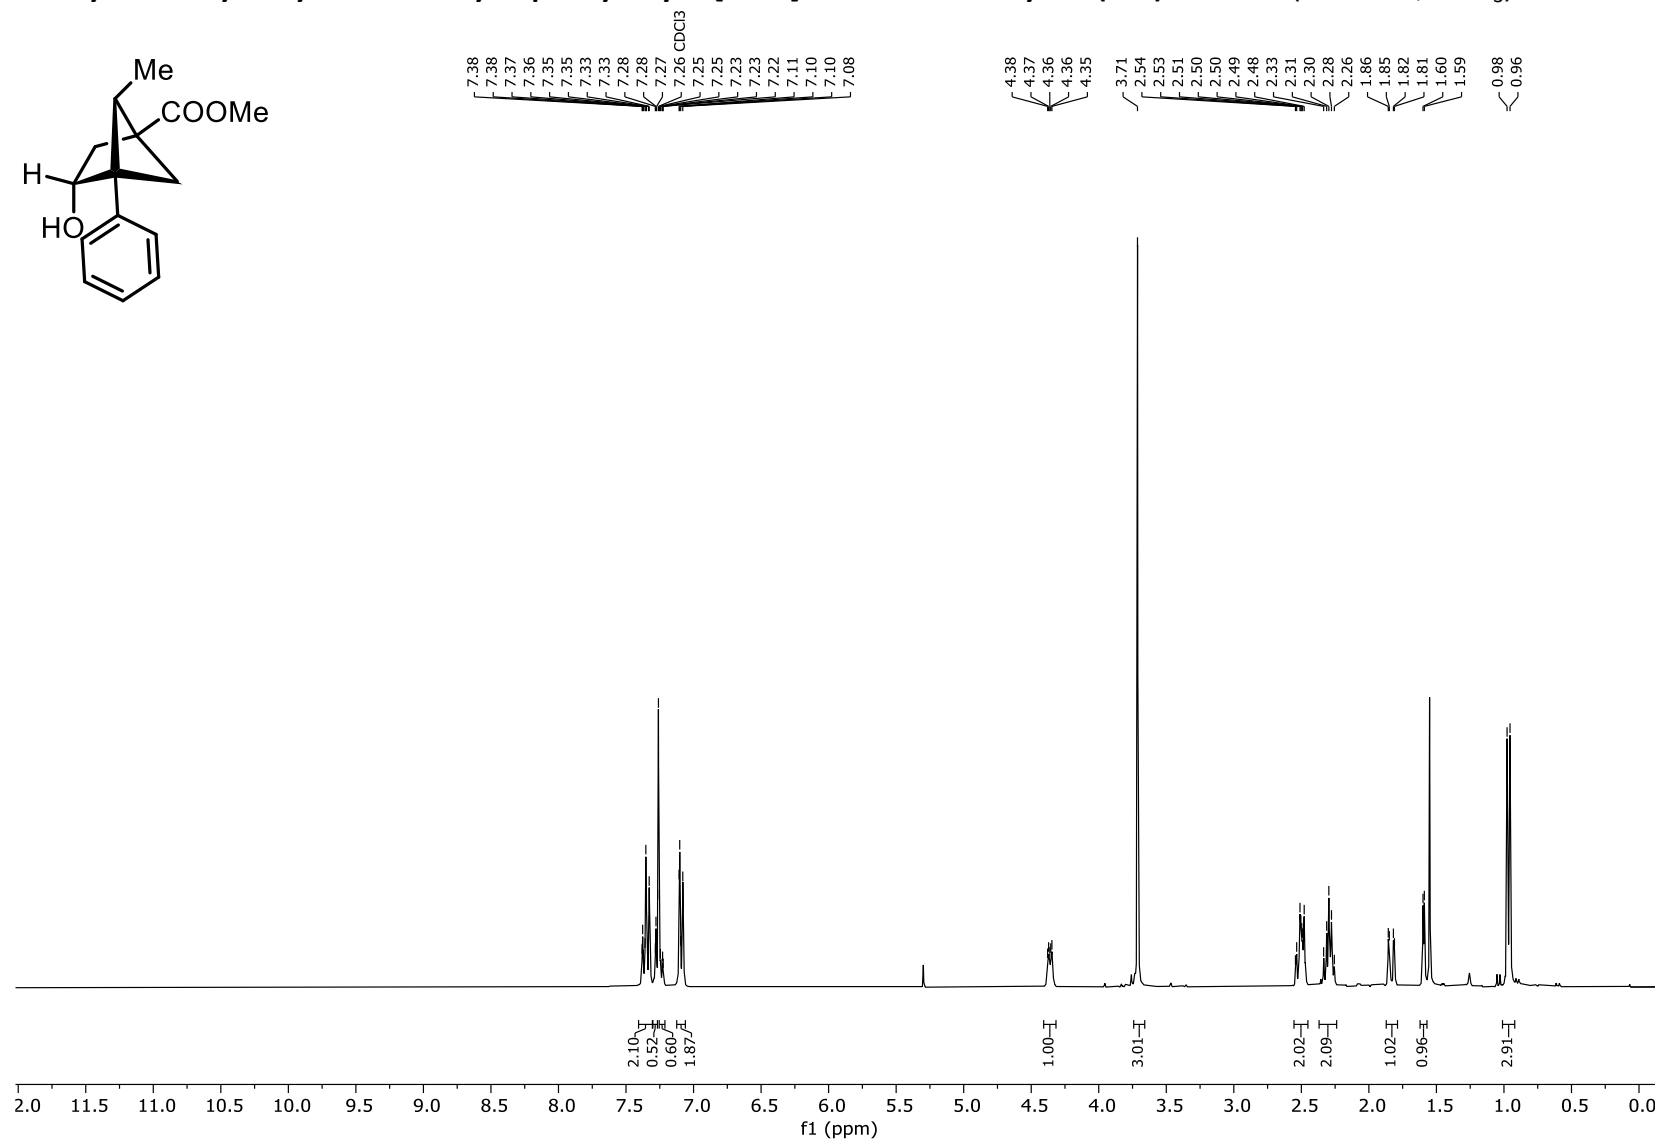

Methyl 2-exo-hydroxy-5-exo-methyl-4-phenylbicyclo[2.1.1]hexane-1-carboxylate (2aa):  $^{13}\text{C}\{^1\text{H}\}$  NMR (101 MHz,  $\text{CDCl}_3$ )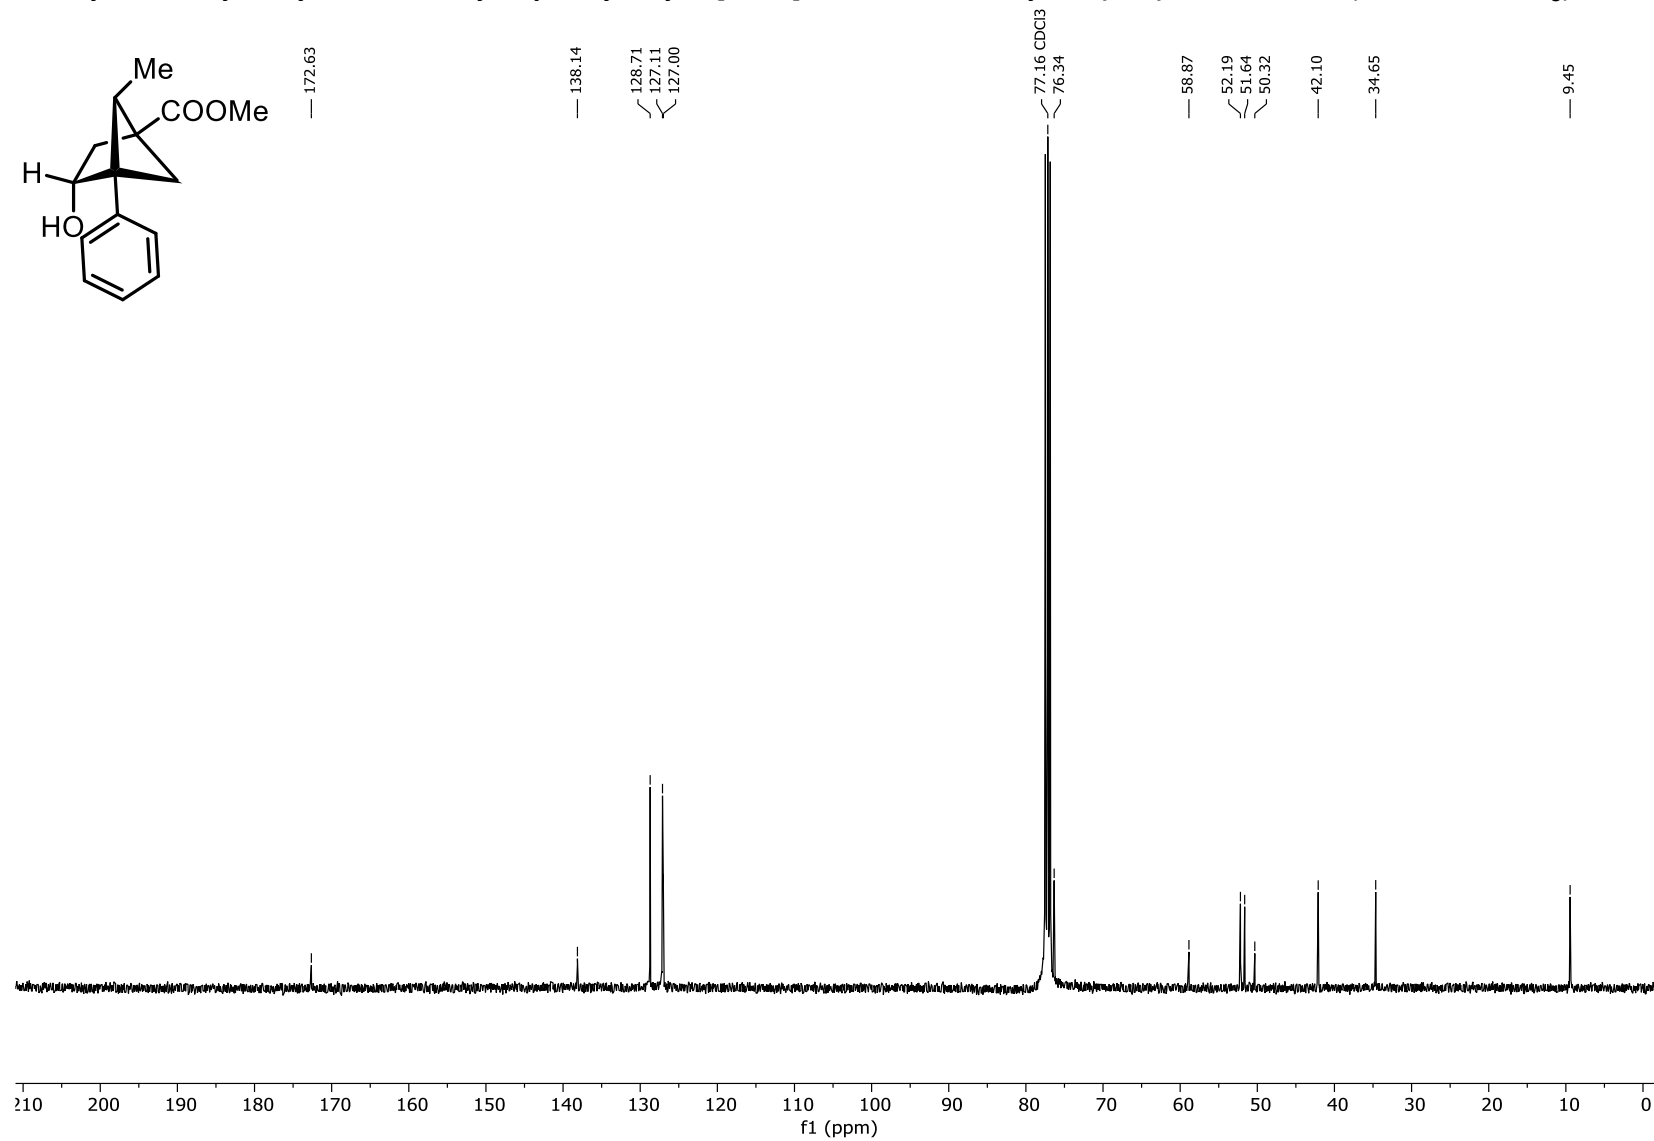

Methyl 2-*exo*-hydroxy-5-*exo*-methyl-4-phenylbicyclo[2.1.1]hexane-1-carboxylate (2aa):  $^1\text{H}$  NOESY (400 MHz,  $\text{CDCl}_3$ )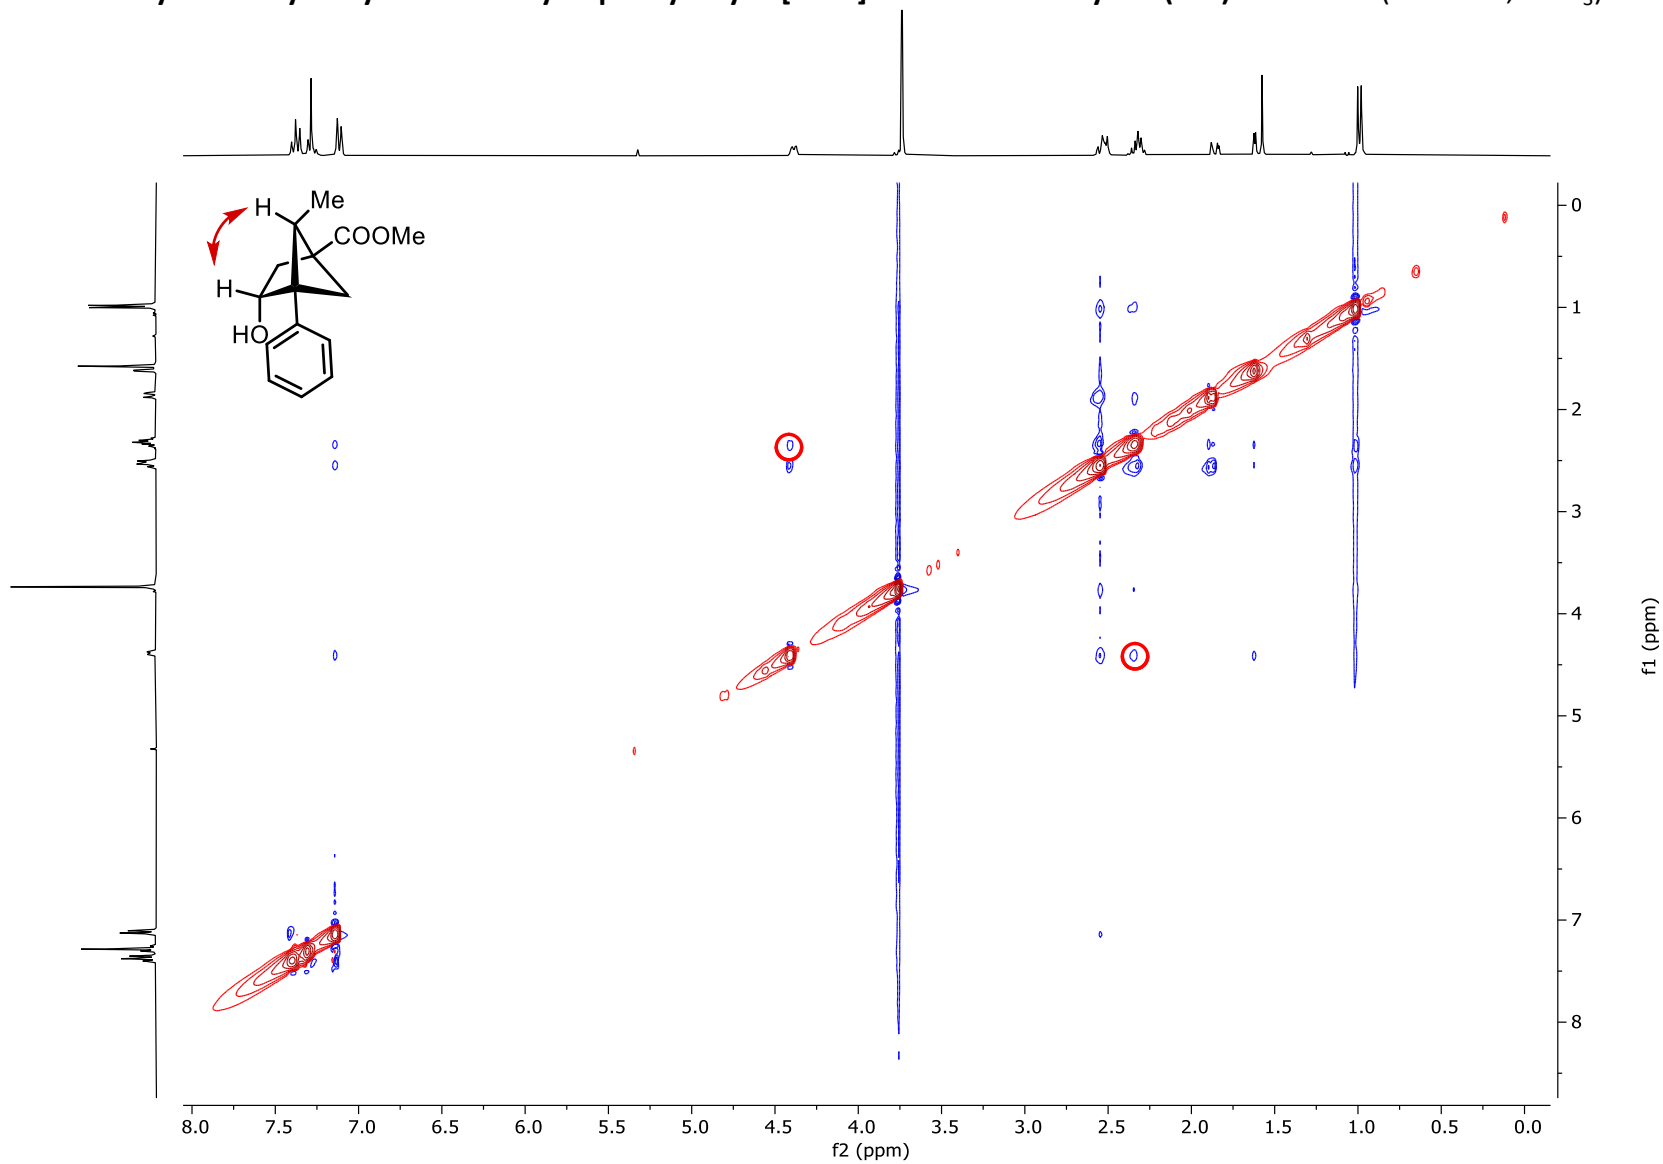

Methyl 2-*exo*-hydroxy-5-*endo*-methyl-4-phenylbicyclo[2.1.1]hexane-1-carboxylate (2a):  $^1\text{H}$  NMR (300 MHz,  $\text{CDCl}_3$ )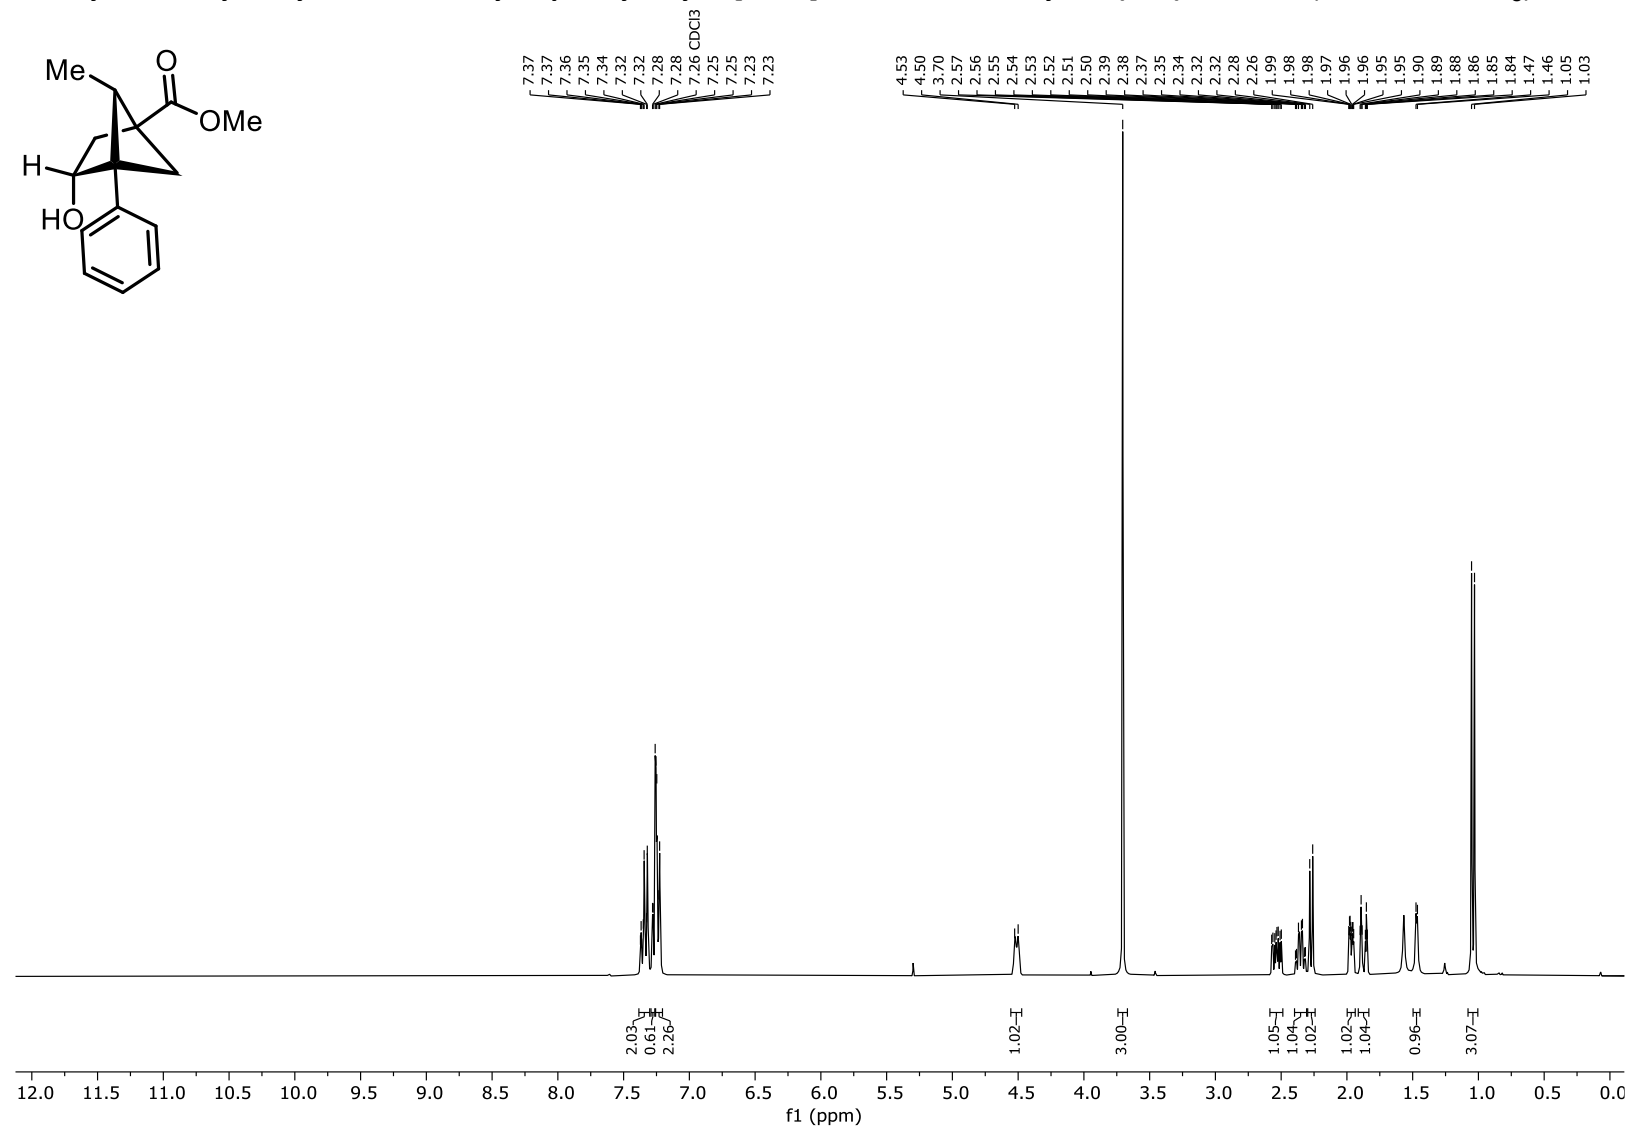

Methyl 2-*exo*-hydroxy-5-*endo*-methyl-4-phenylbicyclo[2.1.1]hexane-1-carboxylate (2aa):  $^{13}\text{C}\{^1\text{H}\}$  NMR (101 MHz,  $\text{CDCl}_3$ )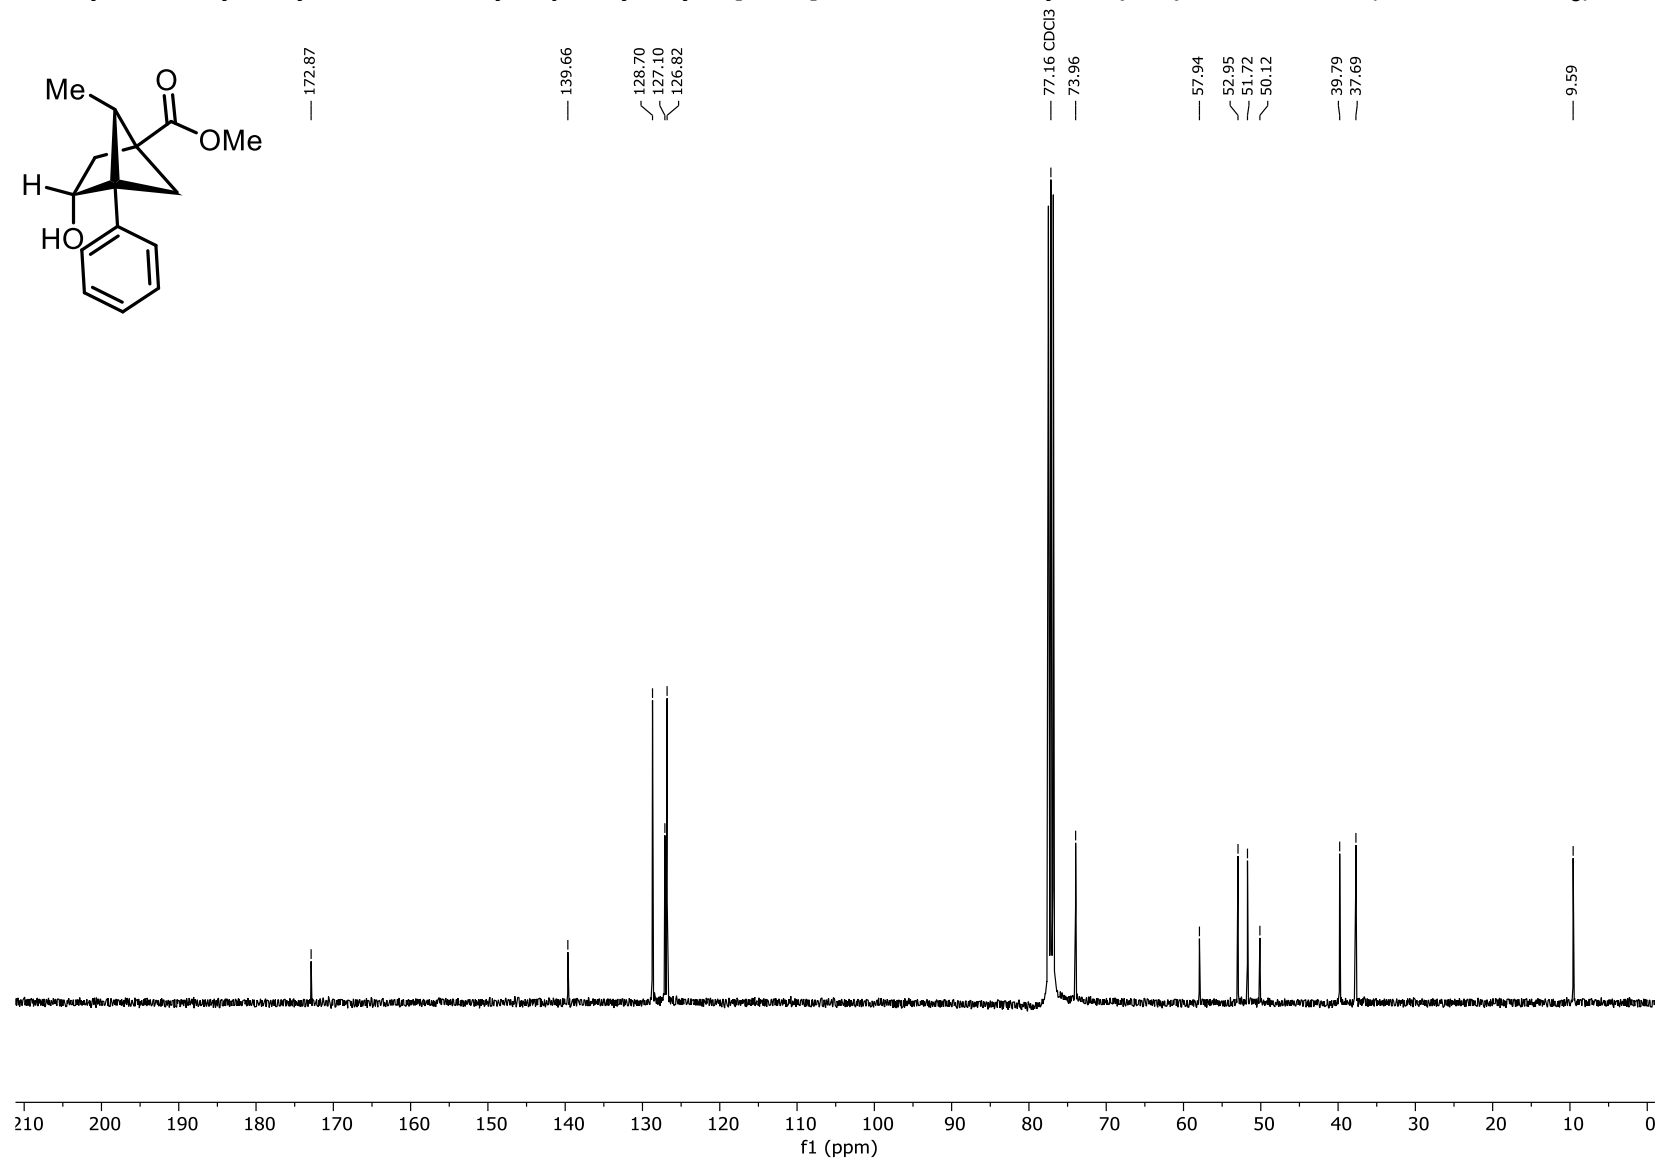

Methyl 2-*exo*-hydroxy-5-*endo*-methyl-4-phenylbicyclo[2.1.1]hexane-1-carboxylate (**2aa**):  $^1\text{H}$  NOESY (400 MHz,  $\text{CDCl}_3$ )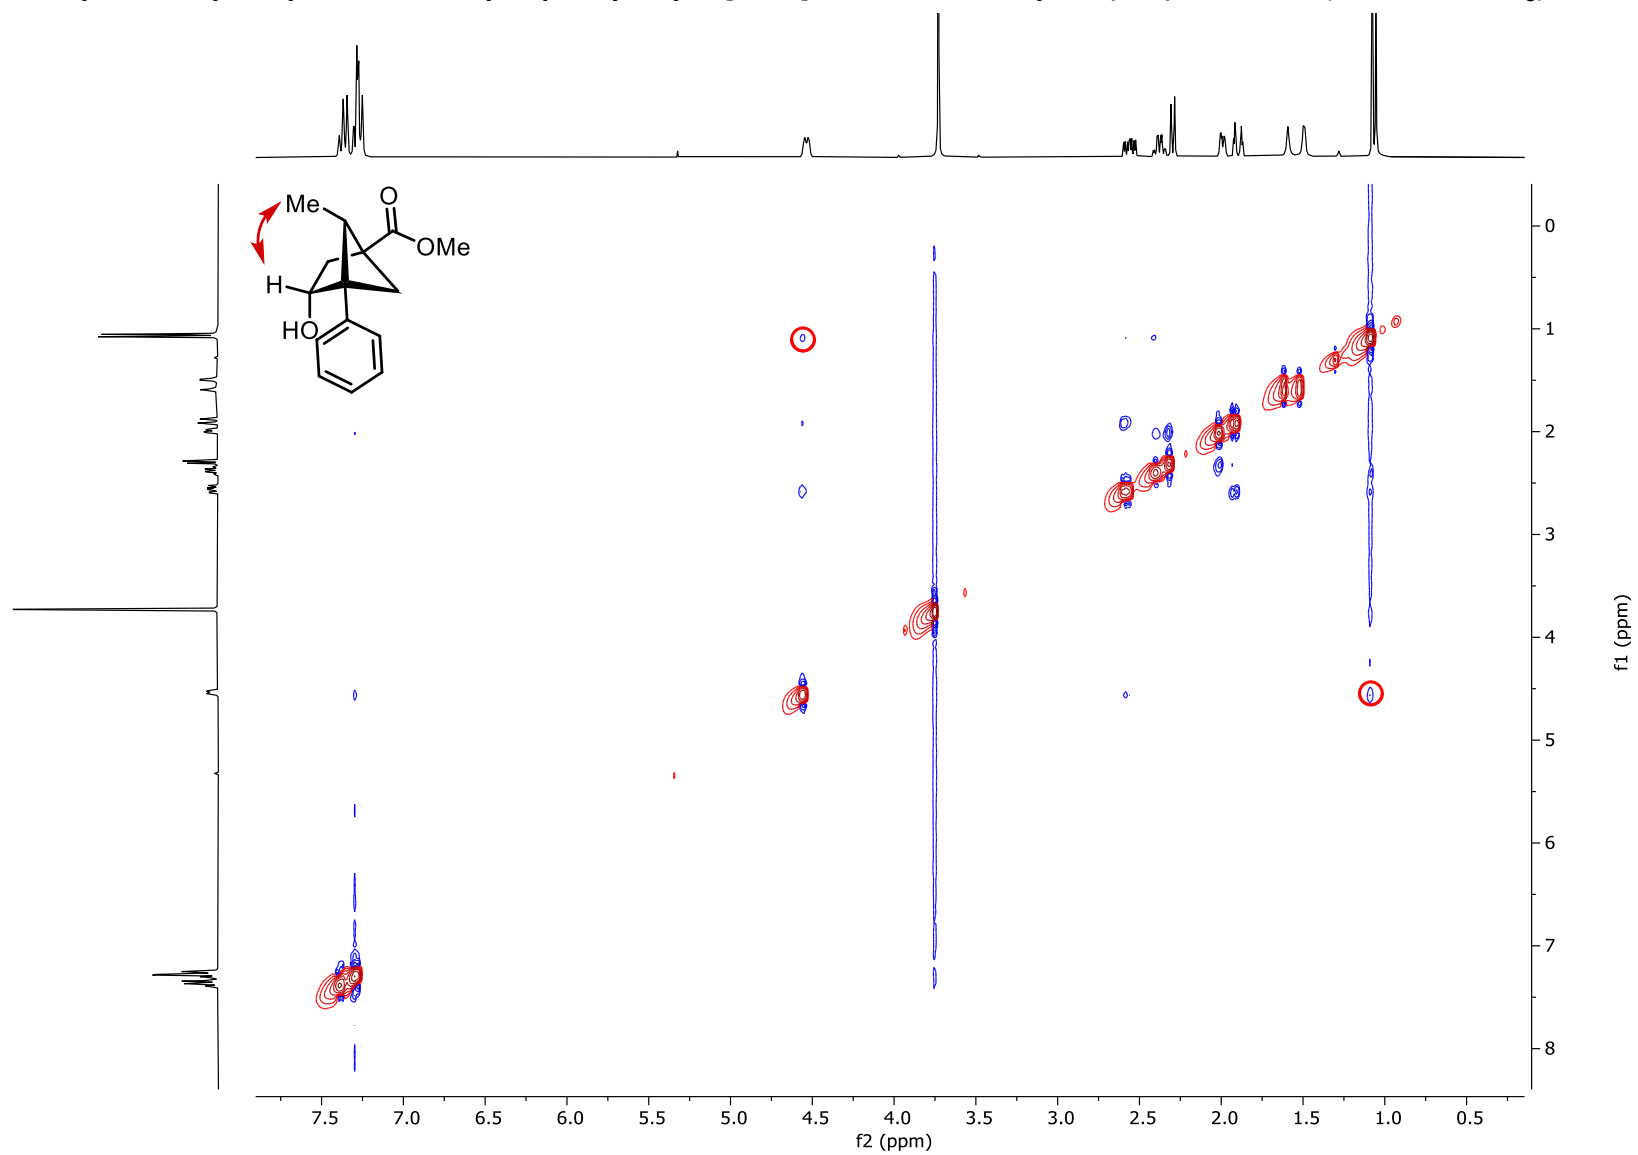



Methyl 2-*endo*-hydroxy-5-*exo*-methyl-4-phenylbicyclo[2.1.1]hexane-1-carboxylate (2a):  $^1\text{H}$  NMR (300 MHz,  $\text{CDCl}_3$ )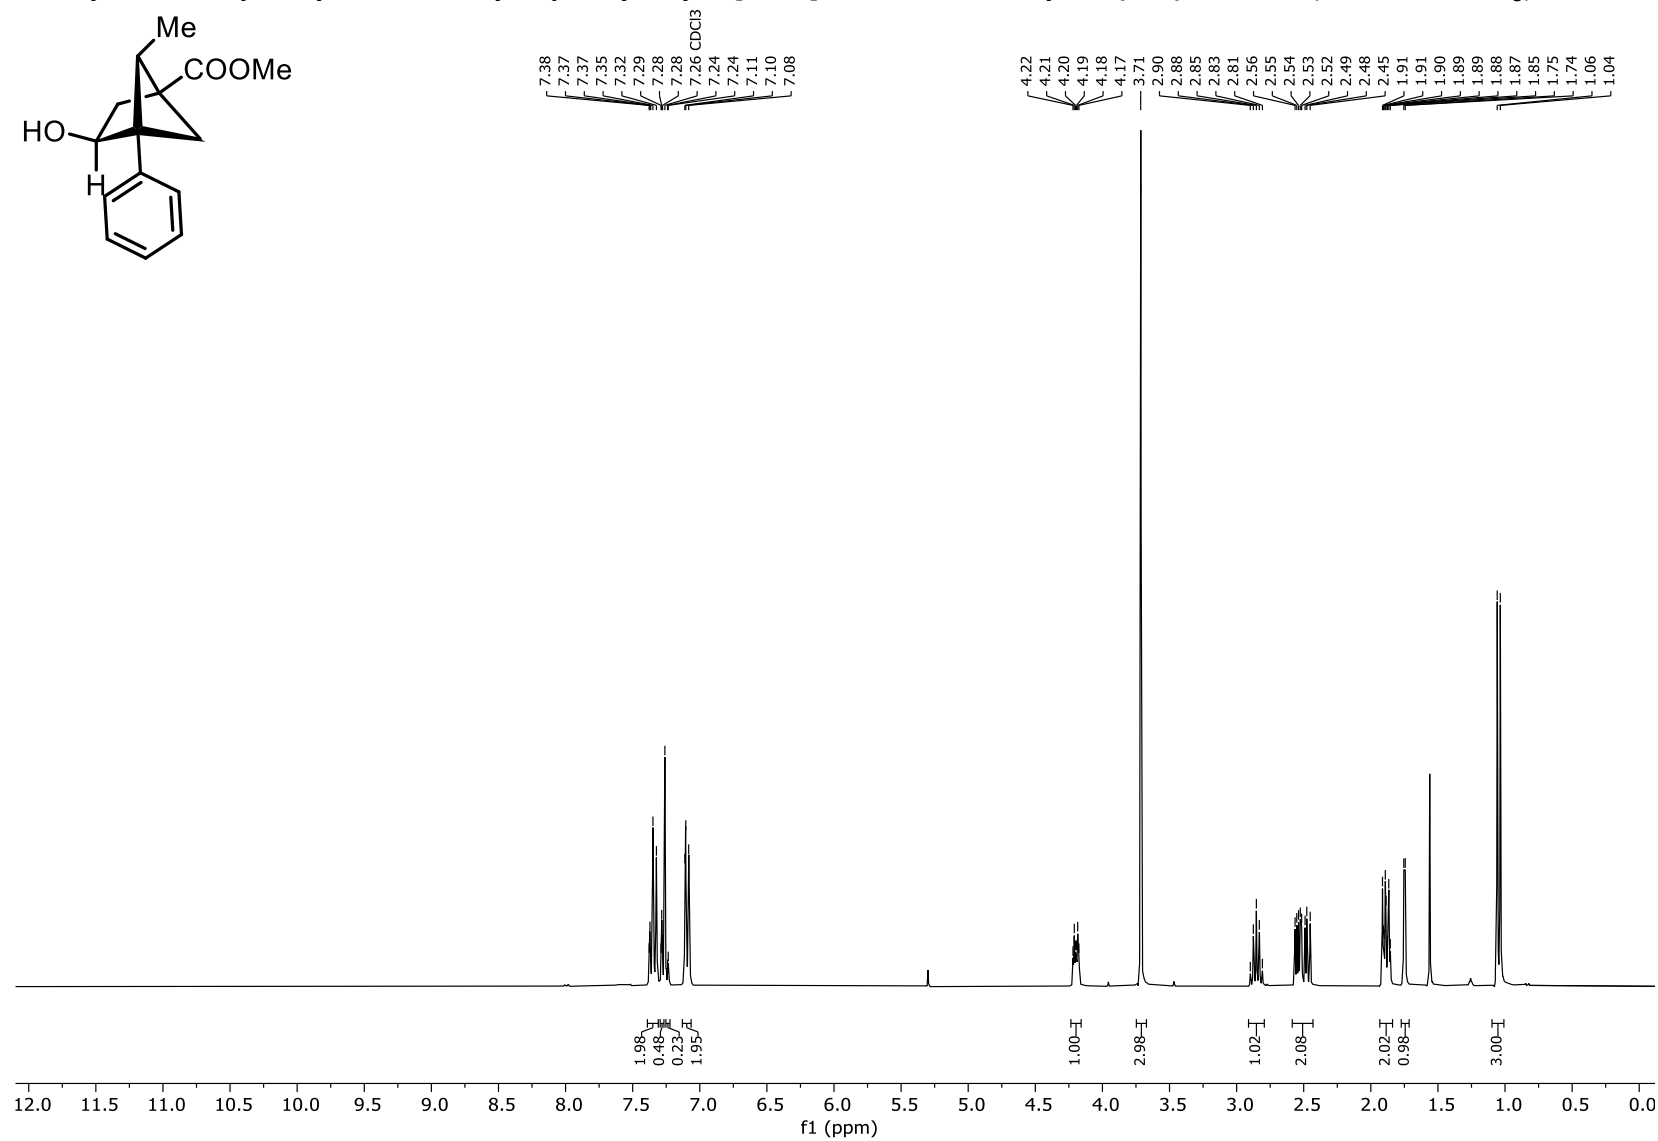

Methyl2-*endo*-hydroxy-5-*exo*-methyl-4-phenylbicyclo[2.1.1]hexane-1-carboxylate (2aa):  $^{13}\text{C}\{^1\text{H}\}$  NMR (101 MHz,  $\text{CDCl}_3$ )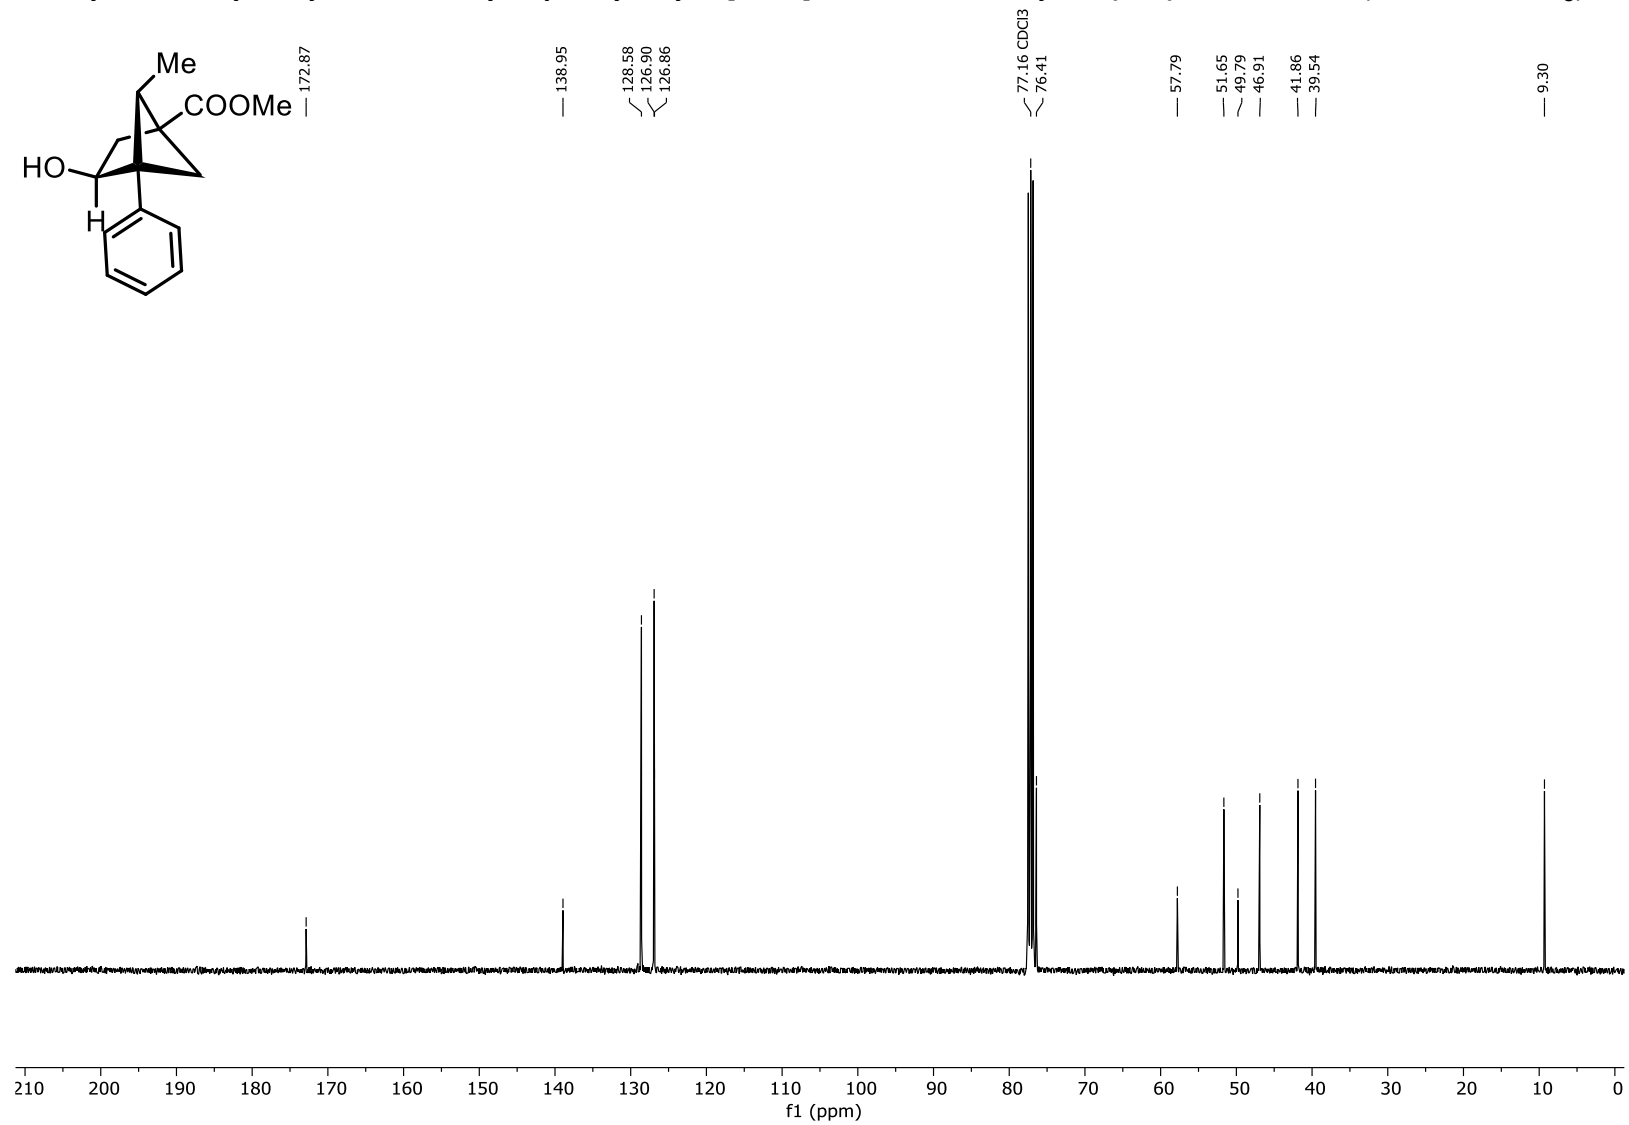

Methyl 2-*endo*-hydroxy-5-*exo*-methyl-4-phenylbicyclo[2.1.1]hexane-1-carboxylate (2a):  $^1\text{H}$  NOESY (400 MHz,  $\text{CDCl}_3$ )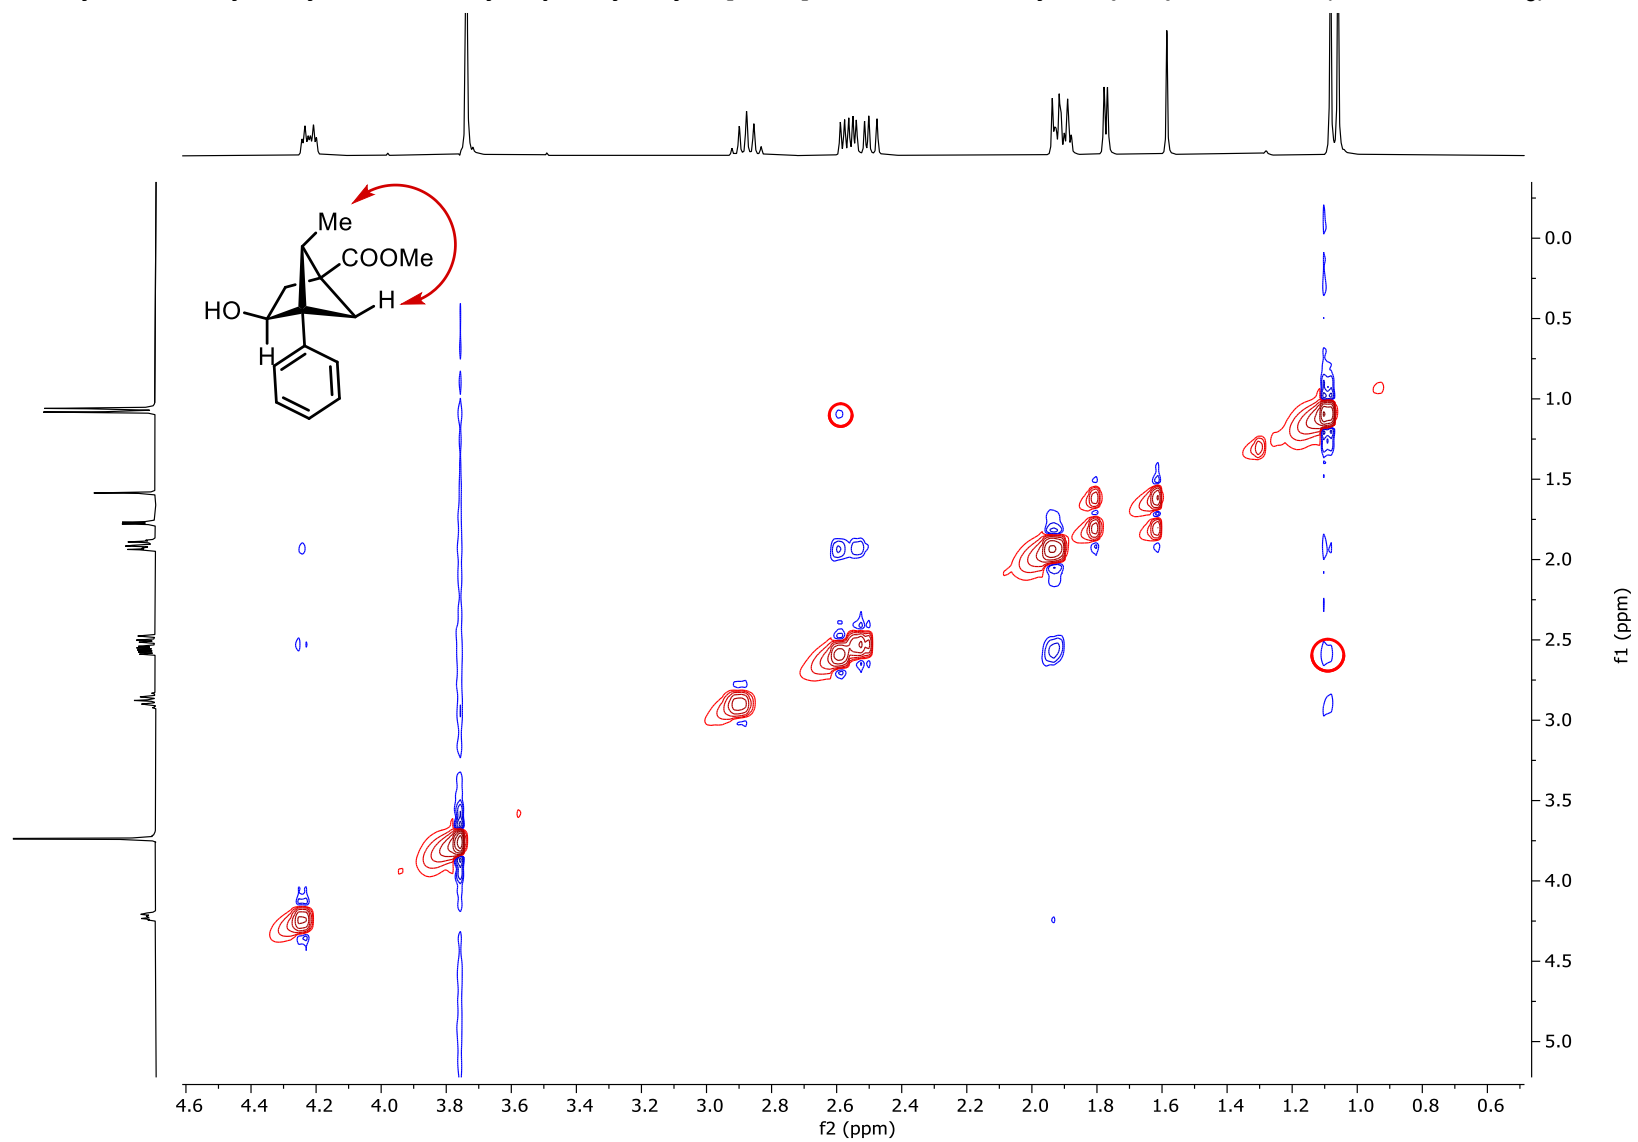

Methyl 2-*endo*-hydroxy-5-*endo*-methyl-4-phenylbicyclo[2.1.1]hexane-1-carboxylate (2a):  $^1\text{H}$  NMR (300 MHz,  $\text{CDCl}_3$ )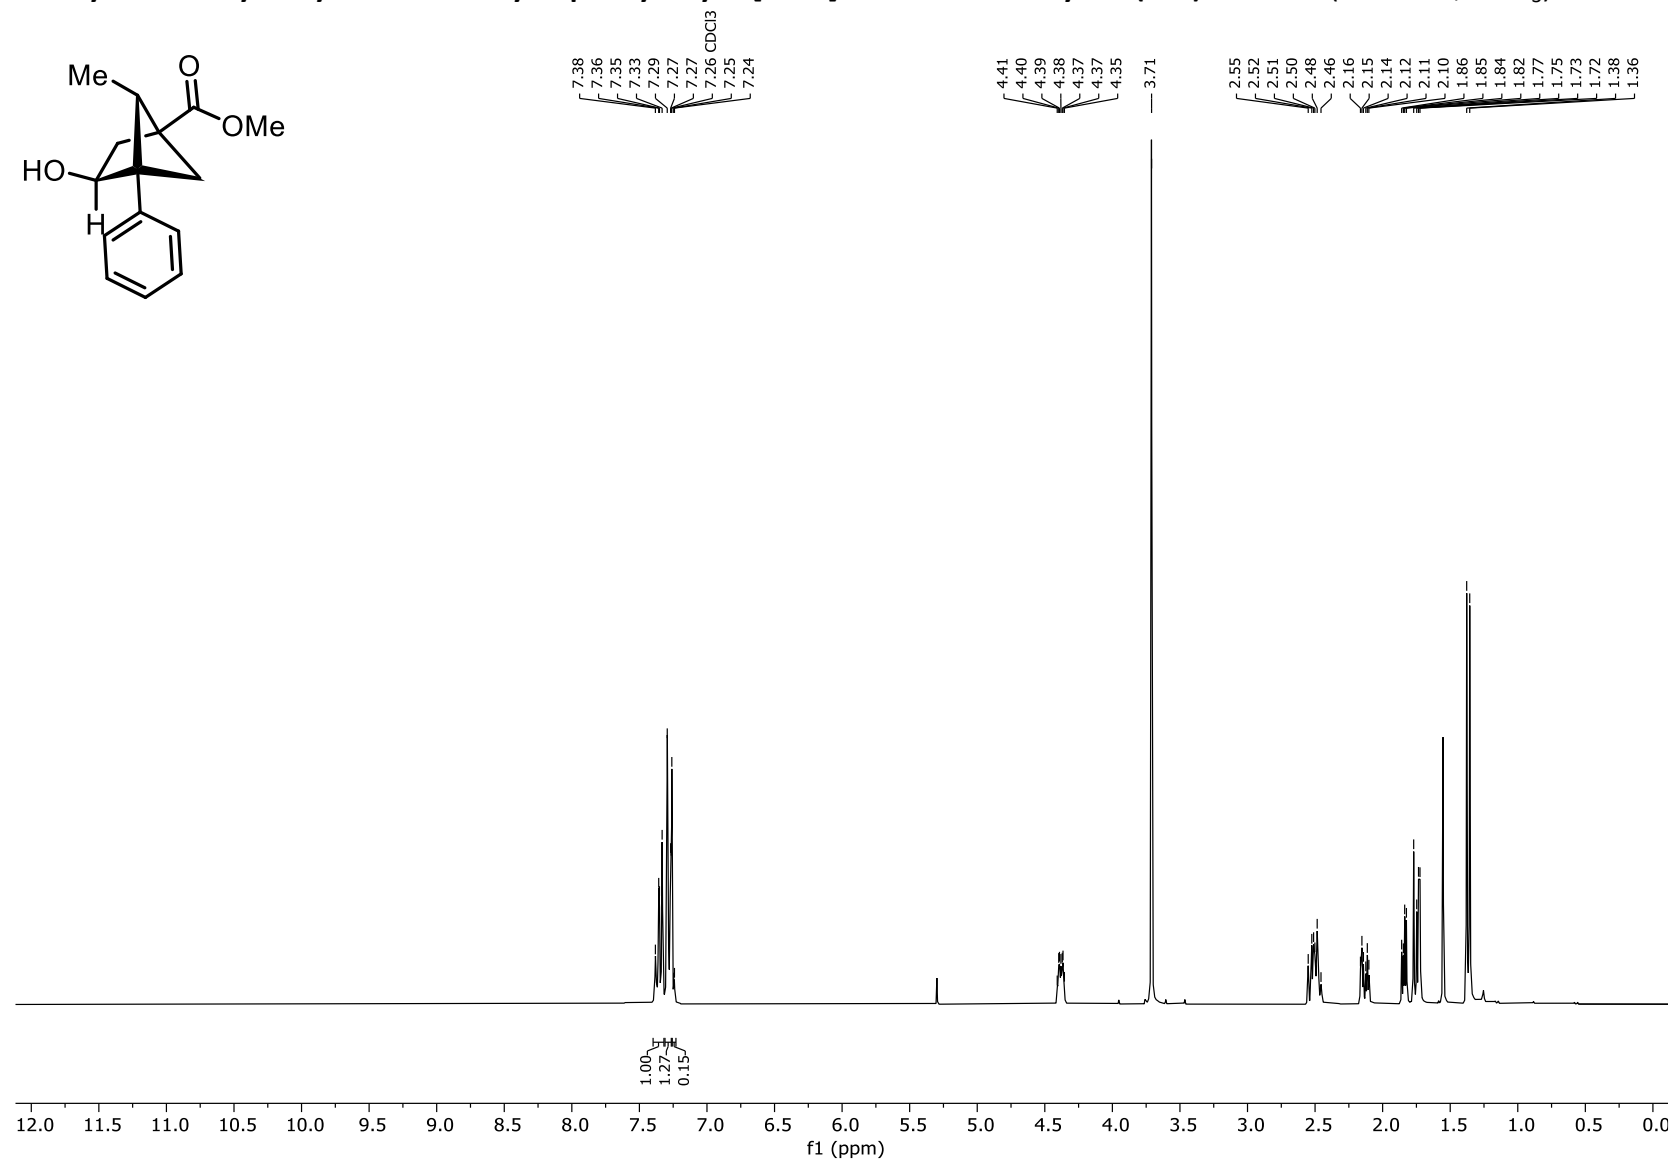

Methyl 2-*endo*-hydroxy-5-*endo*-methyl-4-phenylbicyclo[2.1.1]hexane-1-carboxylate (2aa):  $^{13}\text{C}\{^1\text{H}\}$  NMR (101 MHz,  $\text{CDCl}_3$ )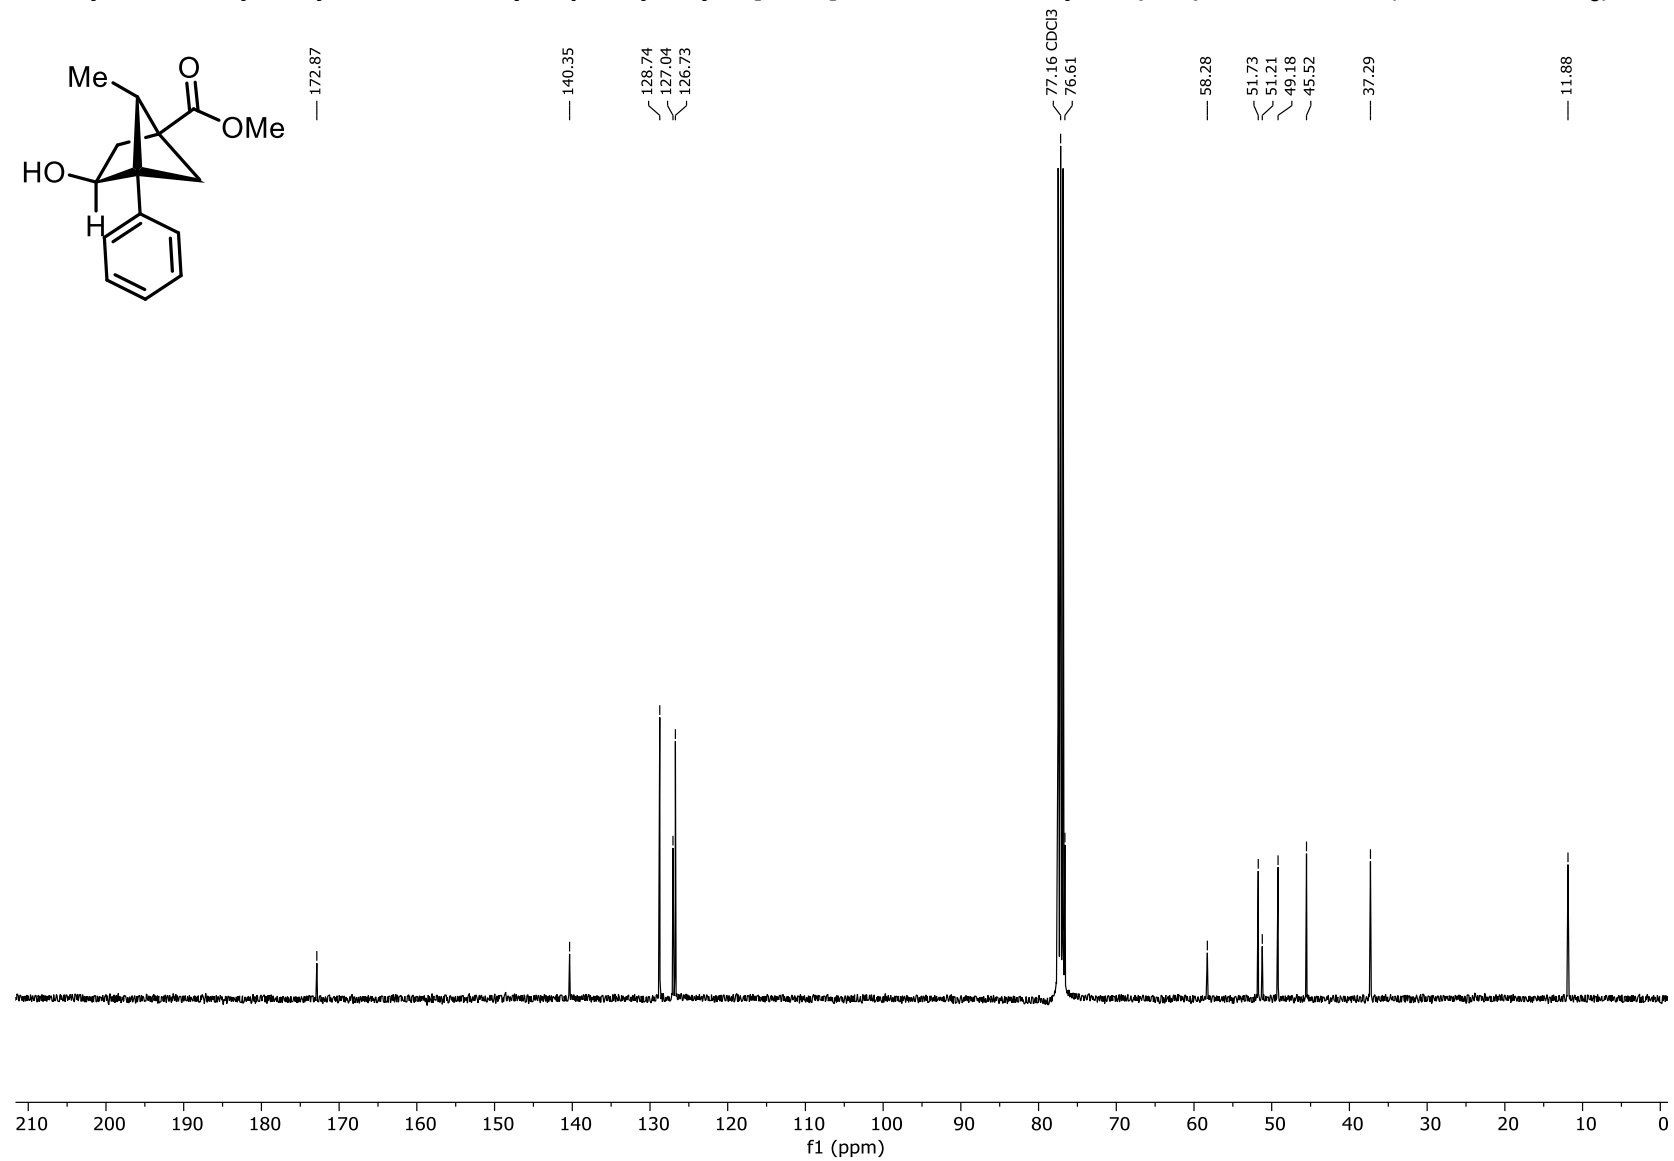

Methyl 2-*endo*-hydroxy-5-*endo*-methyl-4-phenylbicyclo[2.1.1]hexane-1-carboxylate (2aa):  $^1\text{H}$  NOESY (400 MHz,  $\text{CDCl}_3$ )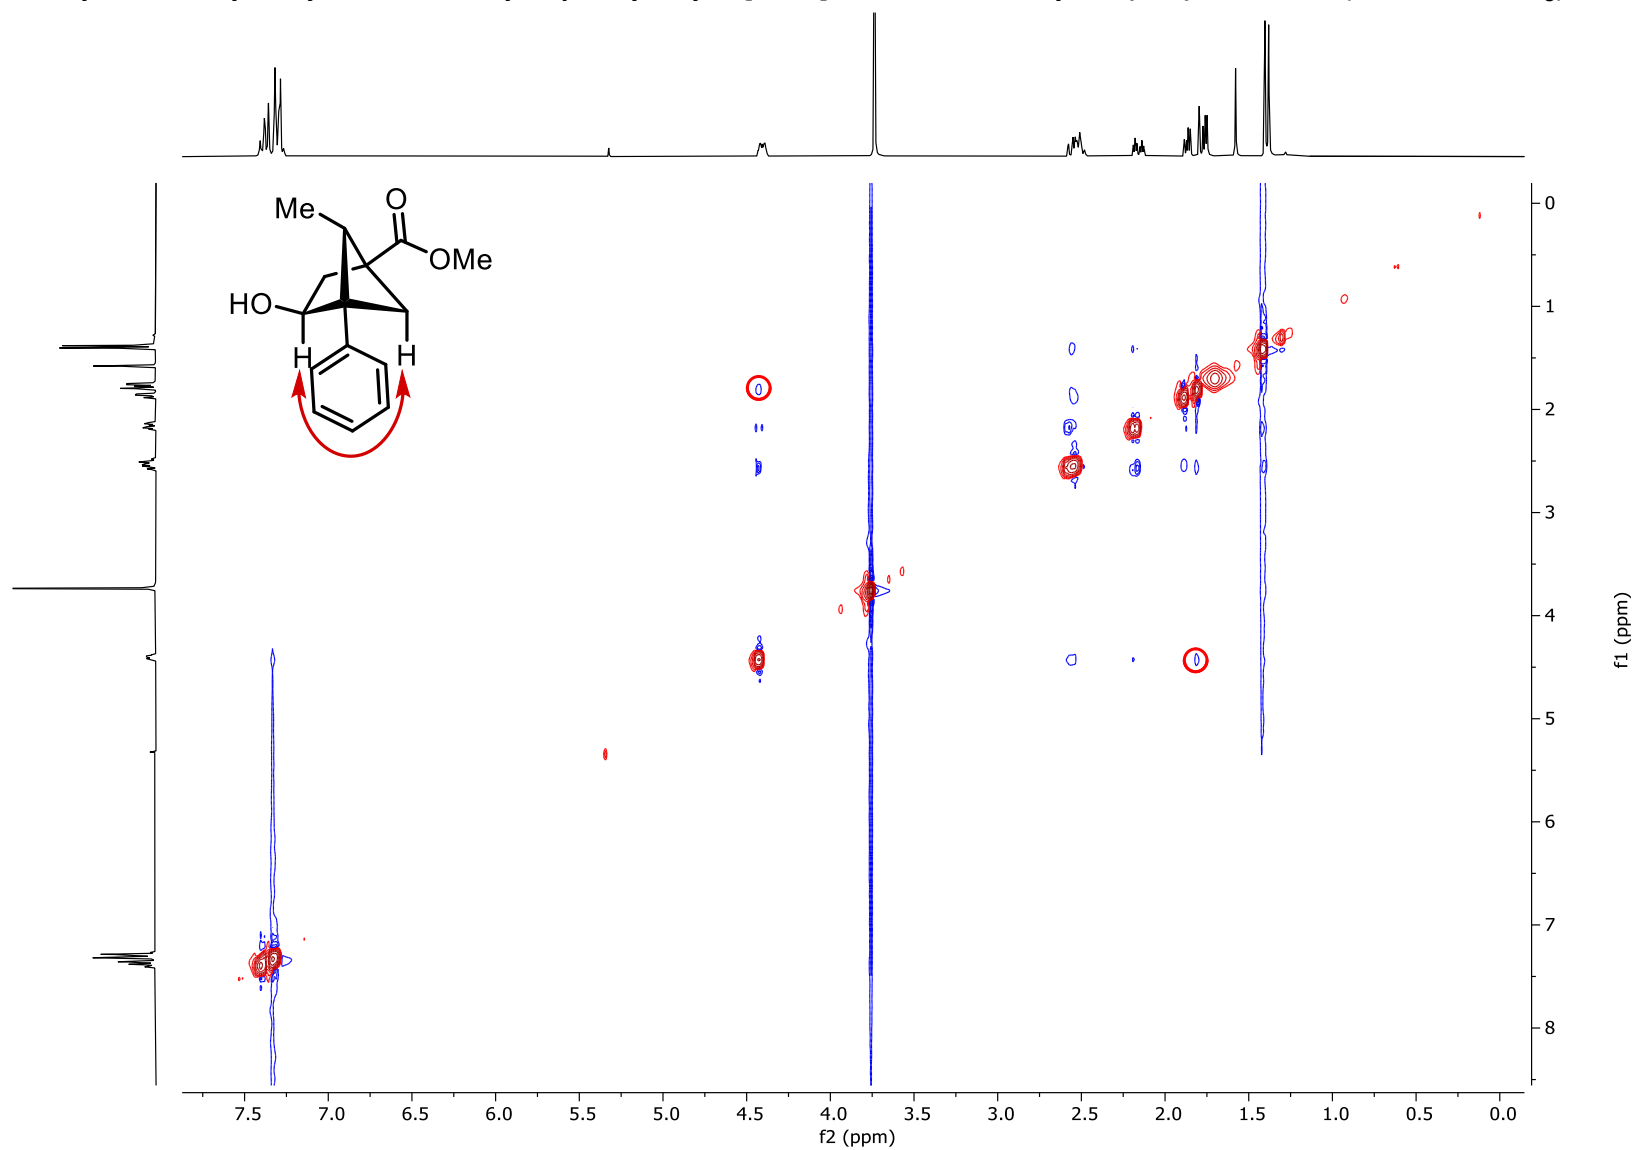

**(1s,4s)-2,2,3,3-tetrafluoro-1,4-diphenylbicyclo[2.1.1]hexane (2ab):  $^1\text{H}$  NMR (300 MHz,  $\text{CDCl}_3$ )**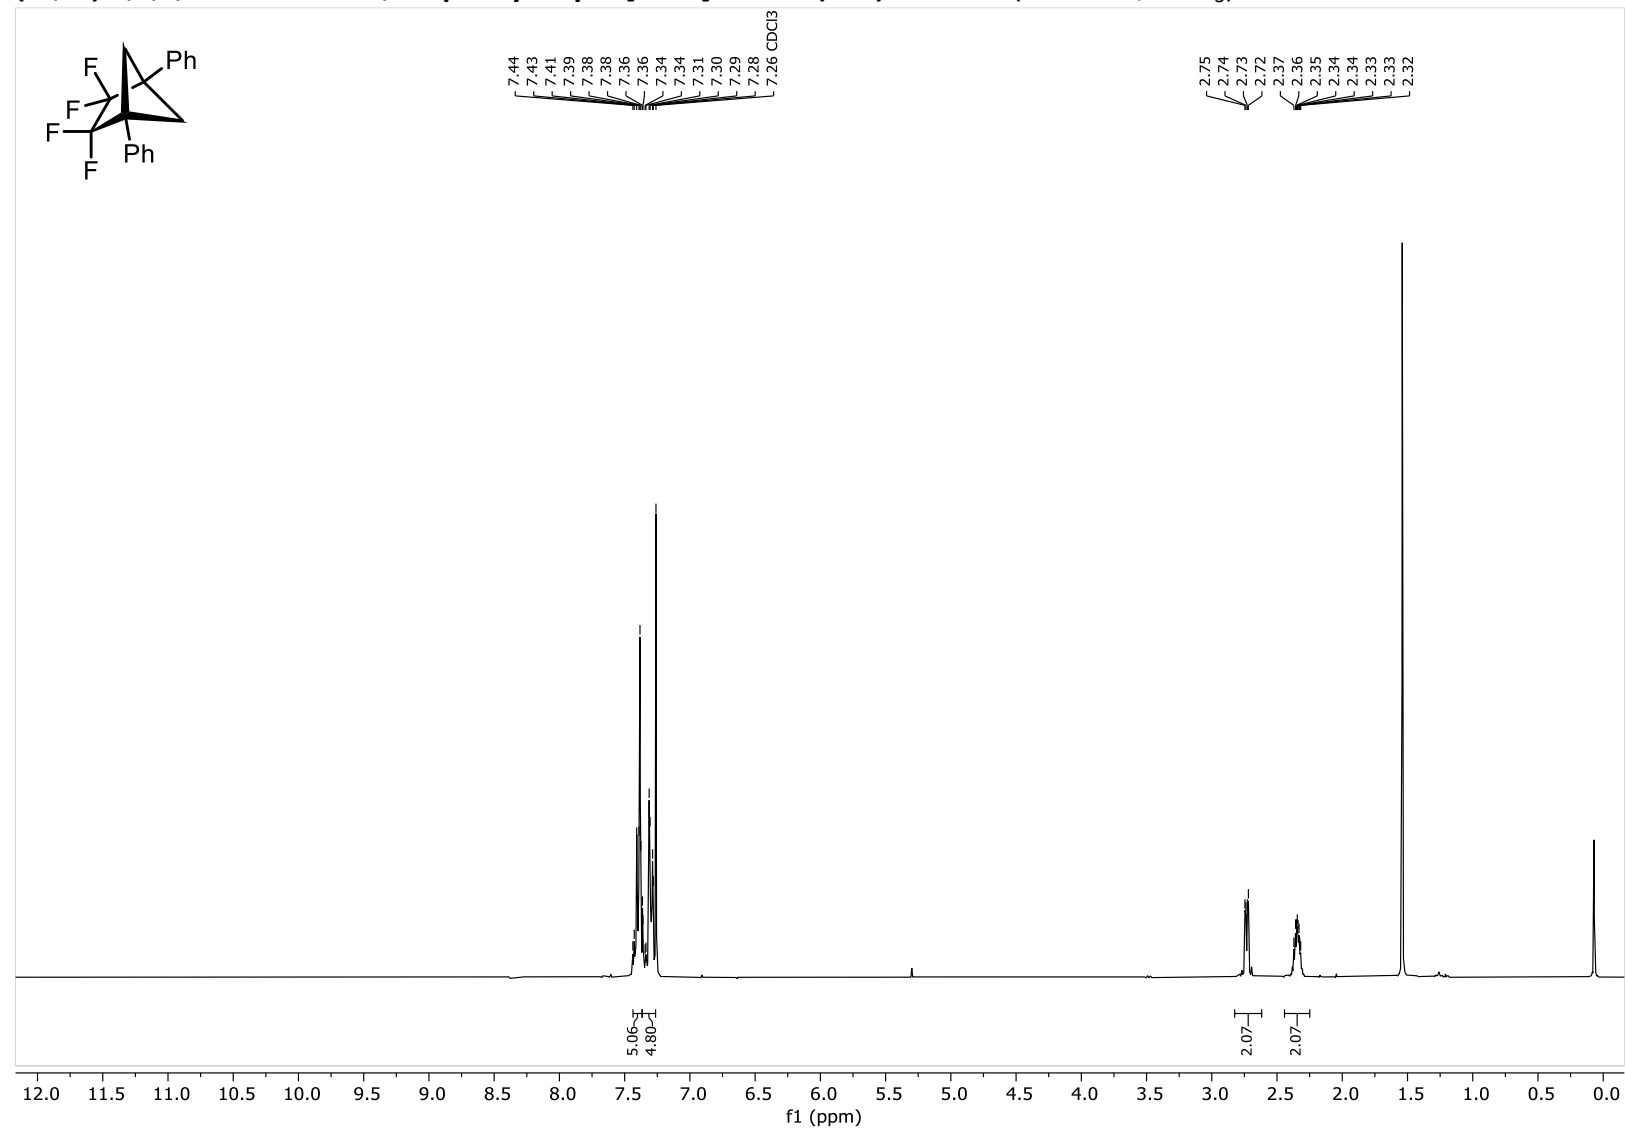

(1*s*,4*s*)-2,2,3,3-tetrafluoro-1,4-diphenylbicyclo[2.1.1]hexane (**2ab**):  $^{13}\text{C}\{^1\text{H}\}$  NMR (101 MHz,  $\text{CDCl}_3$ )

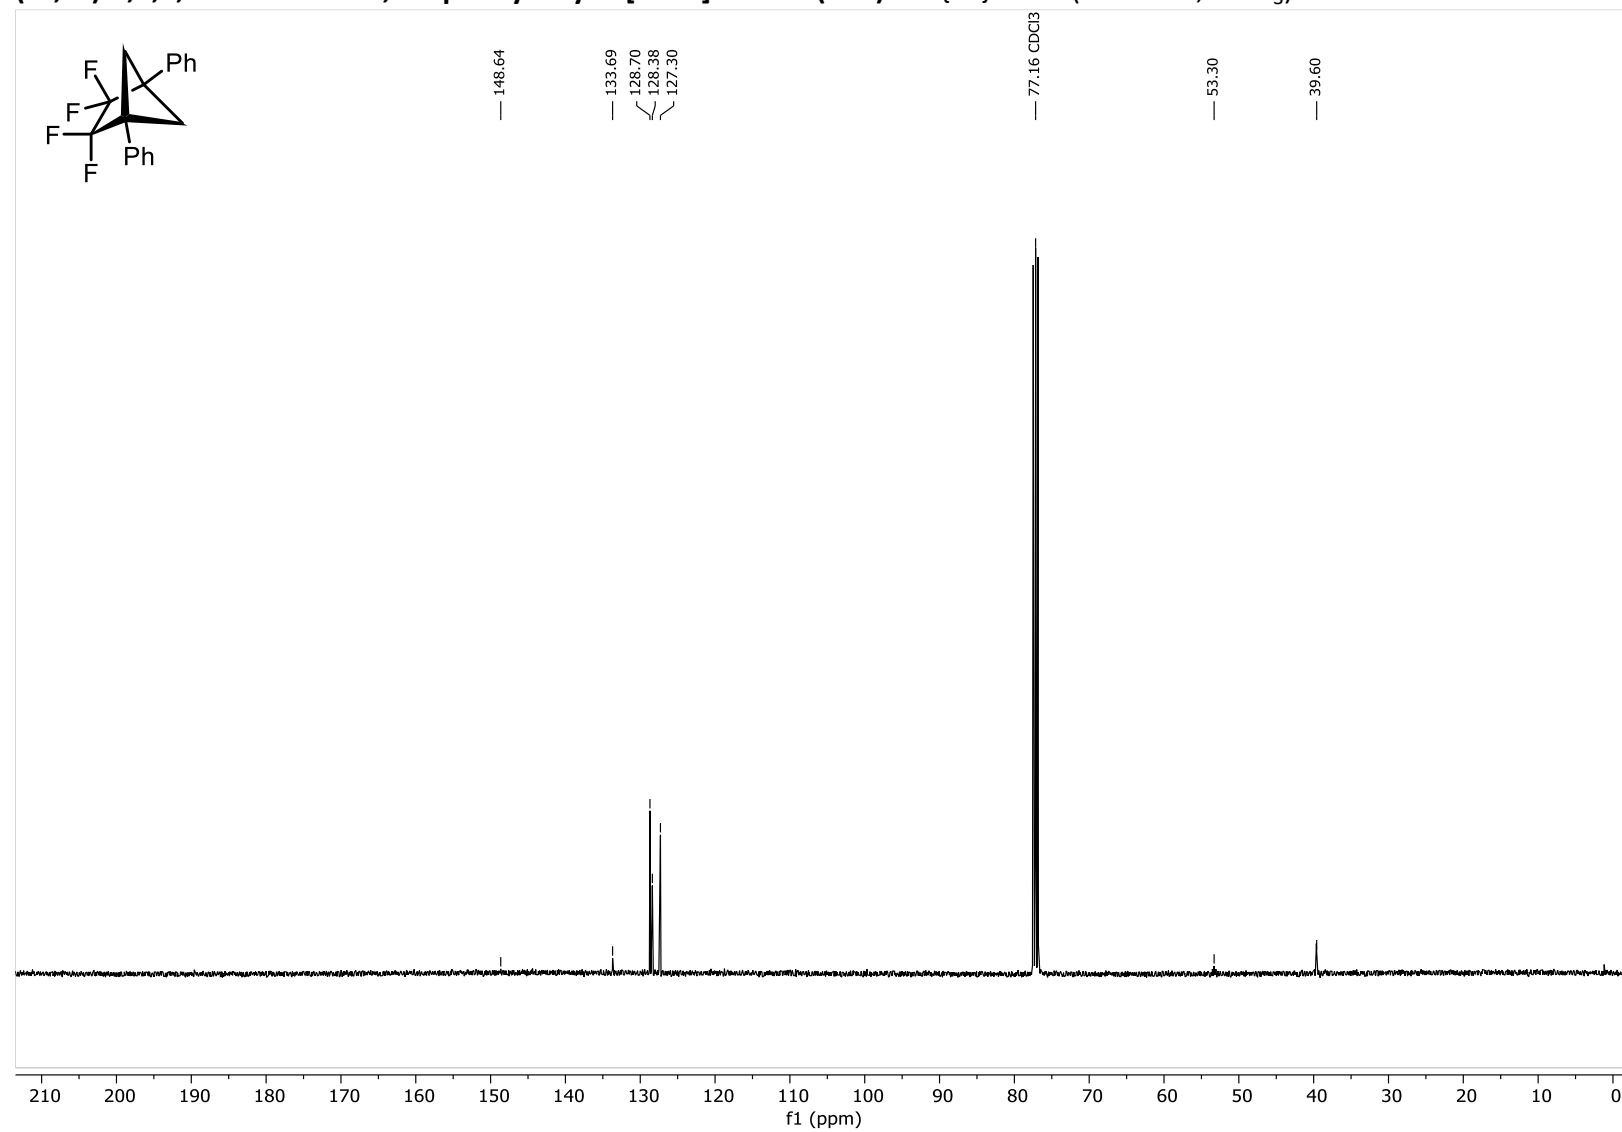



(1s,4s)-2,2,3,3-tetrafluoro-1,4-diphenylbicyclo[2.1.1]hexane (2ab):  $^{19}\text{F}\{^1\text{H}\}$  NMR (282 MHz,  $\text{CDCl}_3$ )

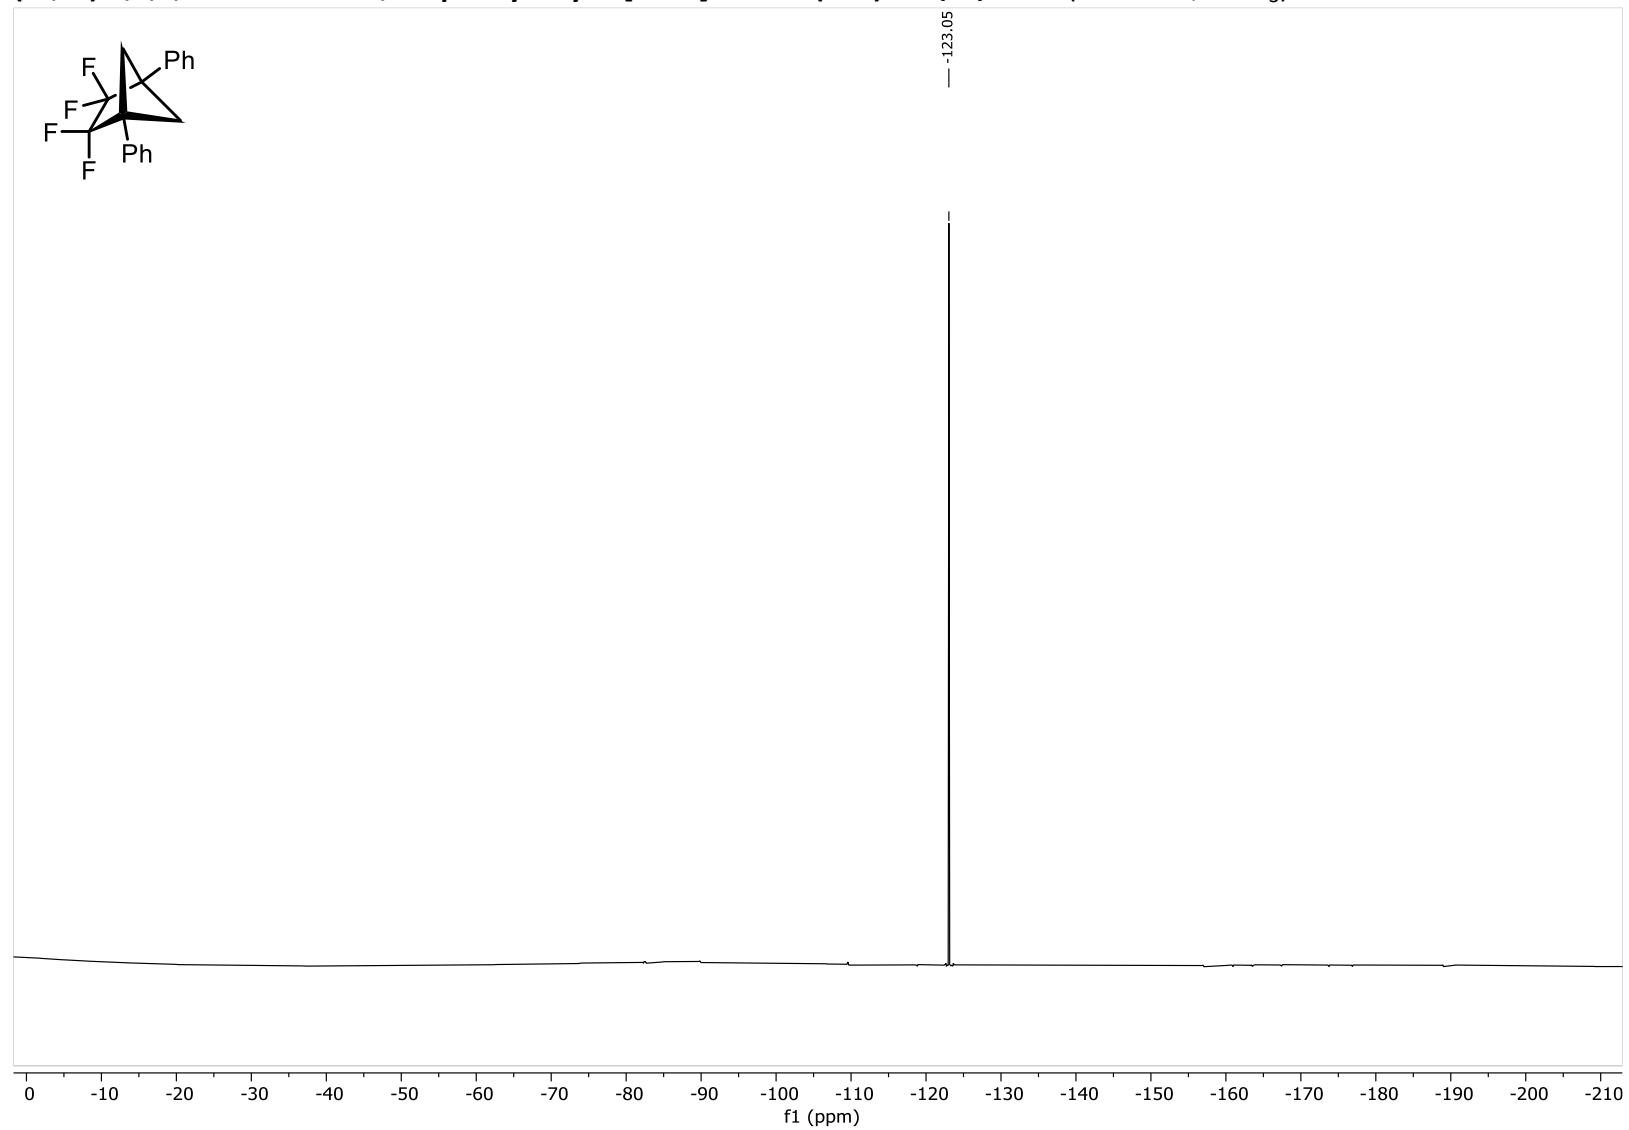

## 7.3 NMR Spectra of BCH 3, 4, 6, 8-10:

3-Hydroxy-N,N-dimethyl-4-phenylbicyclo[2.1.1]hexane-1-carboxamide (3):  $^1\text{H}$  NMR (300 MHz,  $\text{CDCl}_3$ )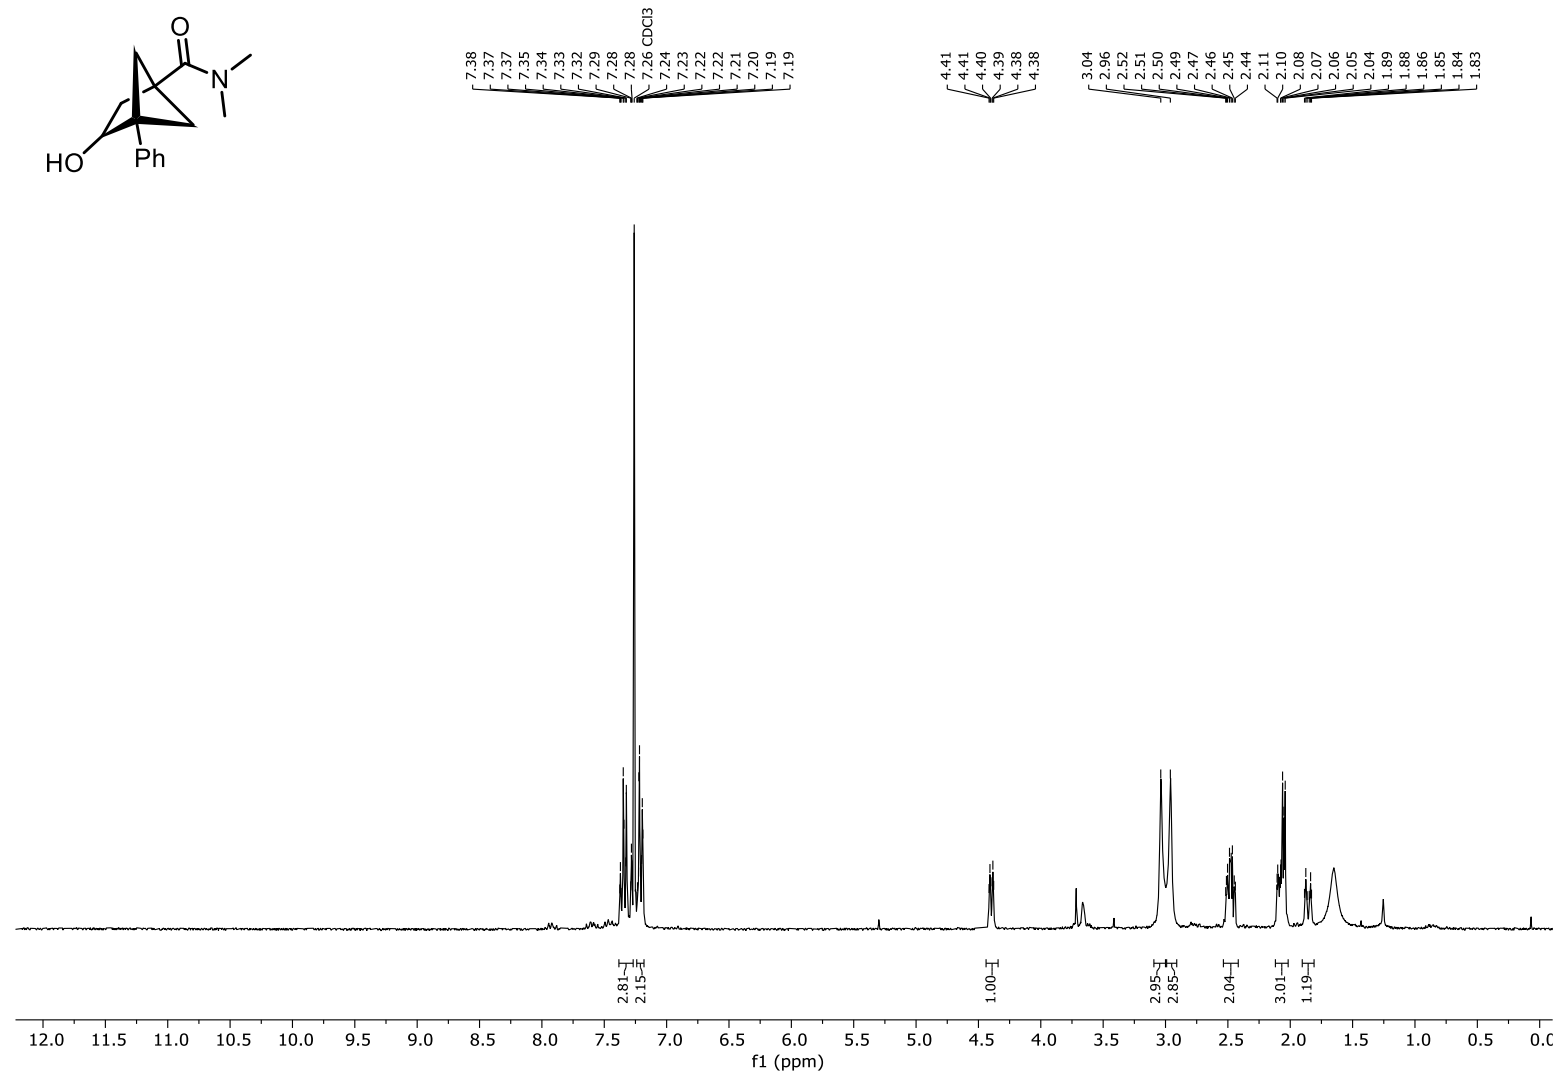

**3-Hydroxy-N,N-dimethyl-4-phenylbicyclo[2.1.1]hexane-1-carboxamide (3):**  $^{13}\text{C}\{^1\text{H}\}$  NMR (101 MHz,  $\text{CDCl}_3$ )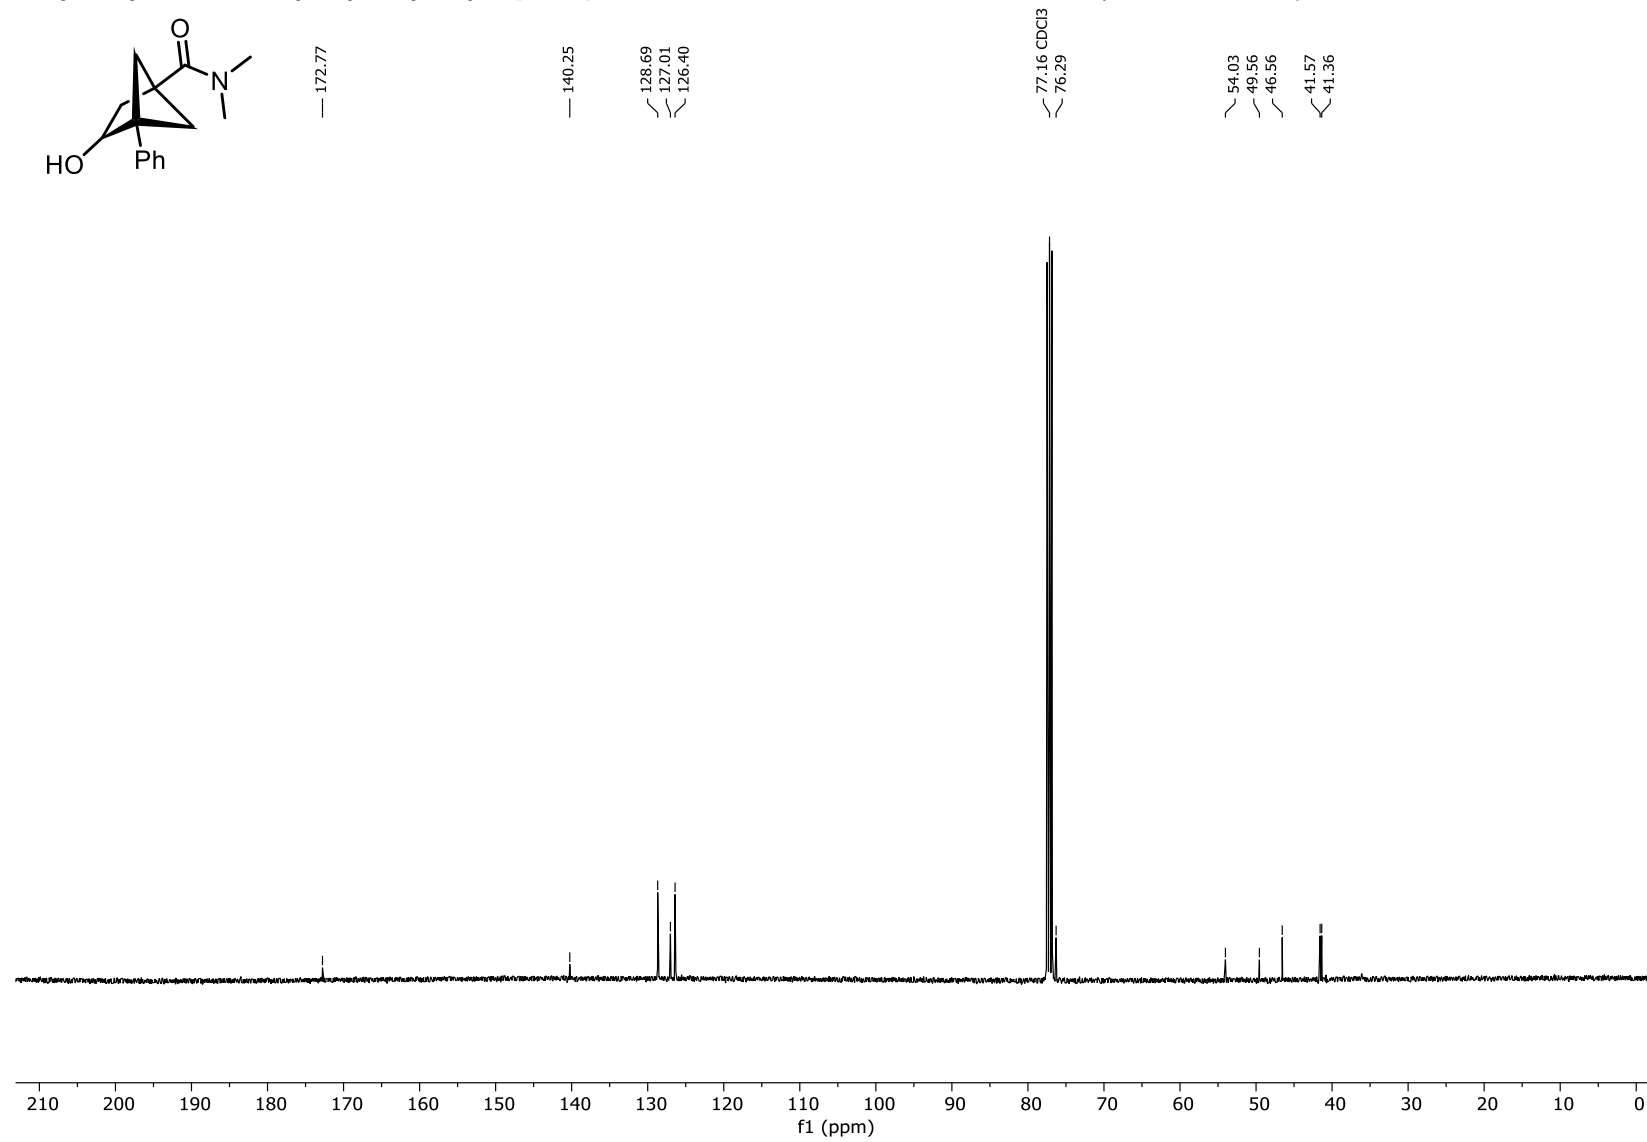

3-Methoxy-N,N-dimethyl-4-phenylbicyclo[2.1.1]hexane-1-carboxamide (4):  $^1\text{H}$  NMR (300 MHz,  $\text{CDCl}_3$ )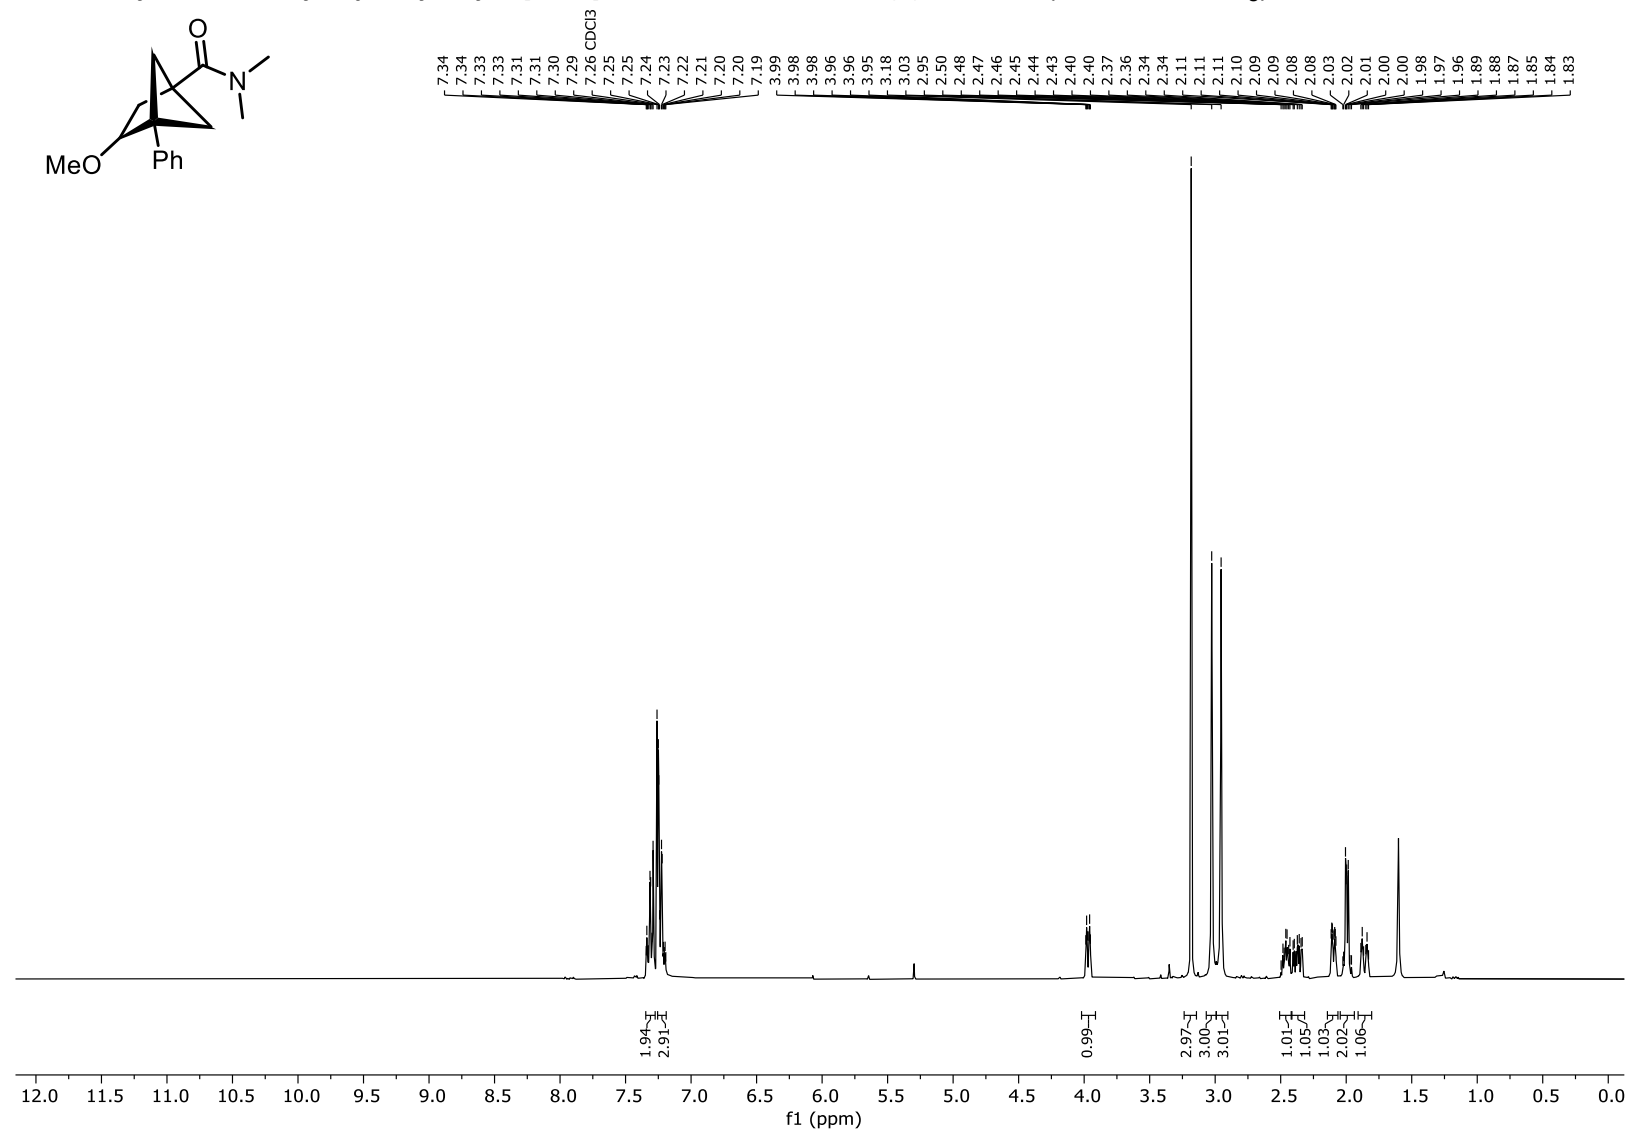

**3-Methoxy-N,N-dimethyl-4-phenylbicyclo[2.1.1]hexane-1-carboxamide (4):**  $^{13}\text{C}\{^1\text{H}\}$  NMR (101 MHz,  $\text{CDCl}_3$ )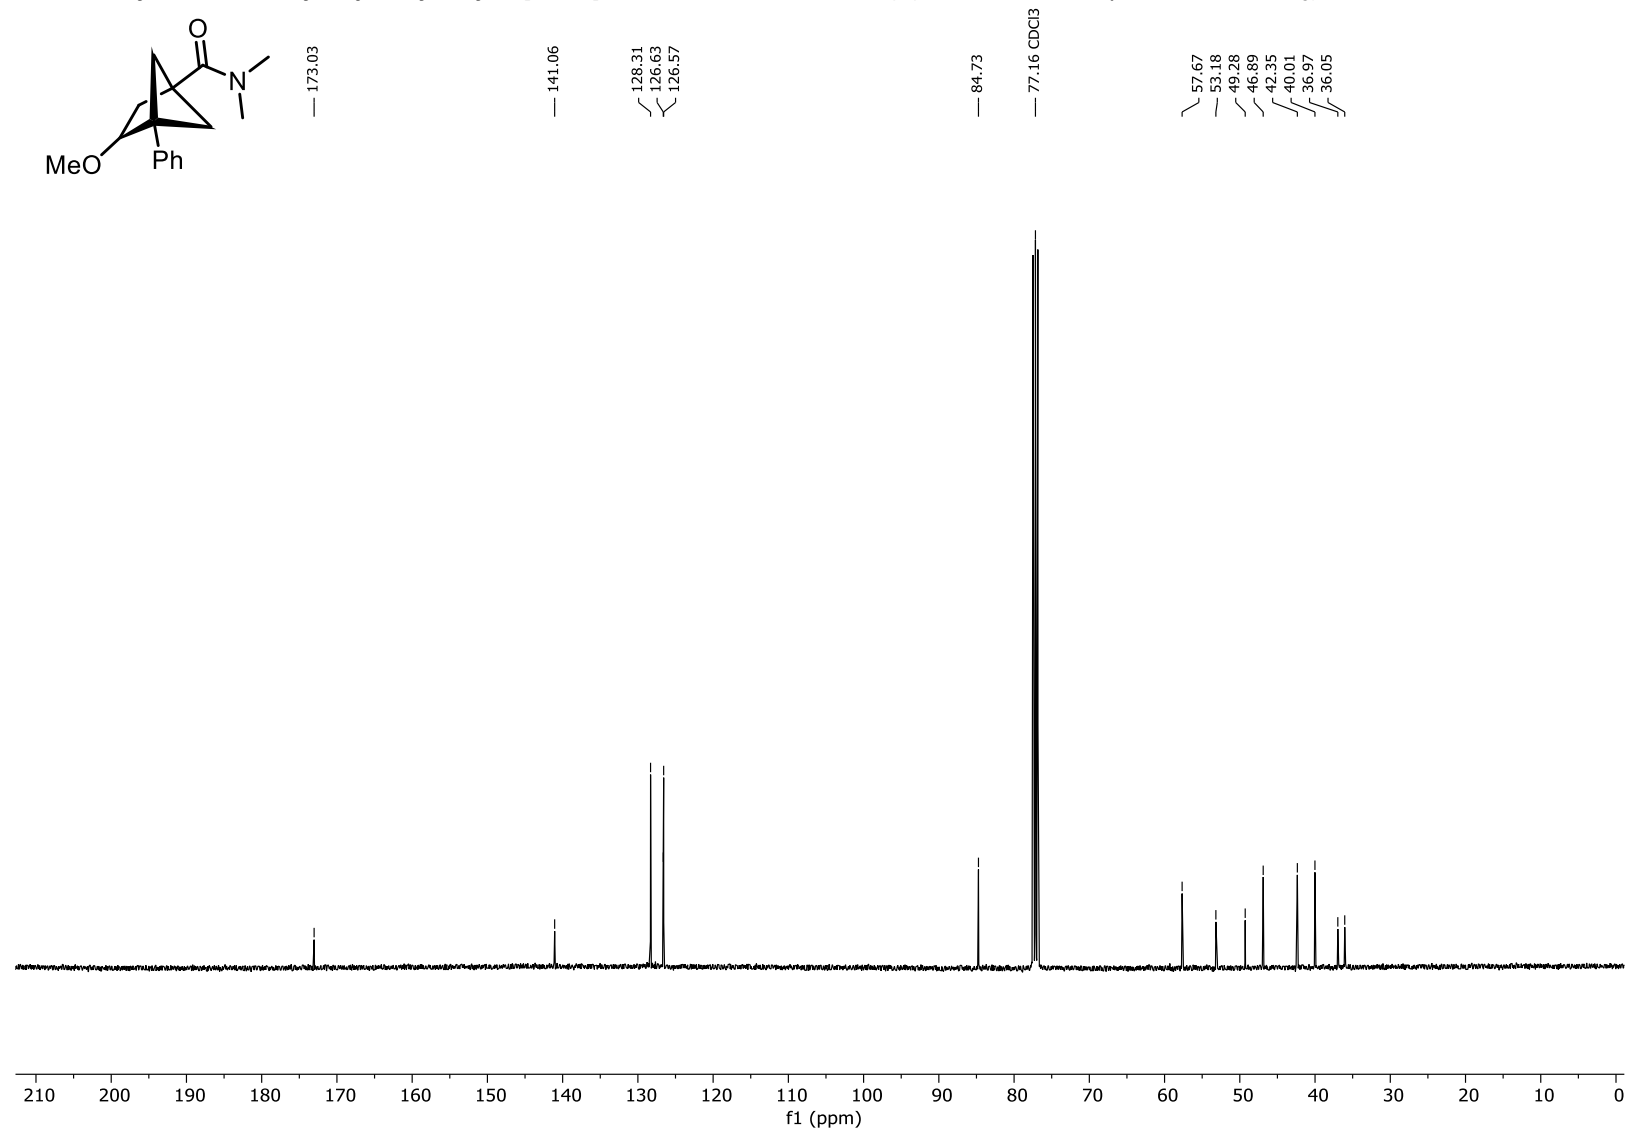

3-Hydroxy-4-phenylbicyclo[2.1.1]hexan-1-yl)(phenyl)methanone (6):  $^1\text{H}$  NMR (300 MHz,  $\text{CDCl}_3$ )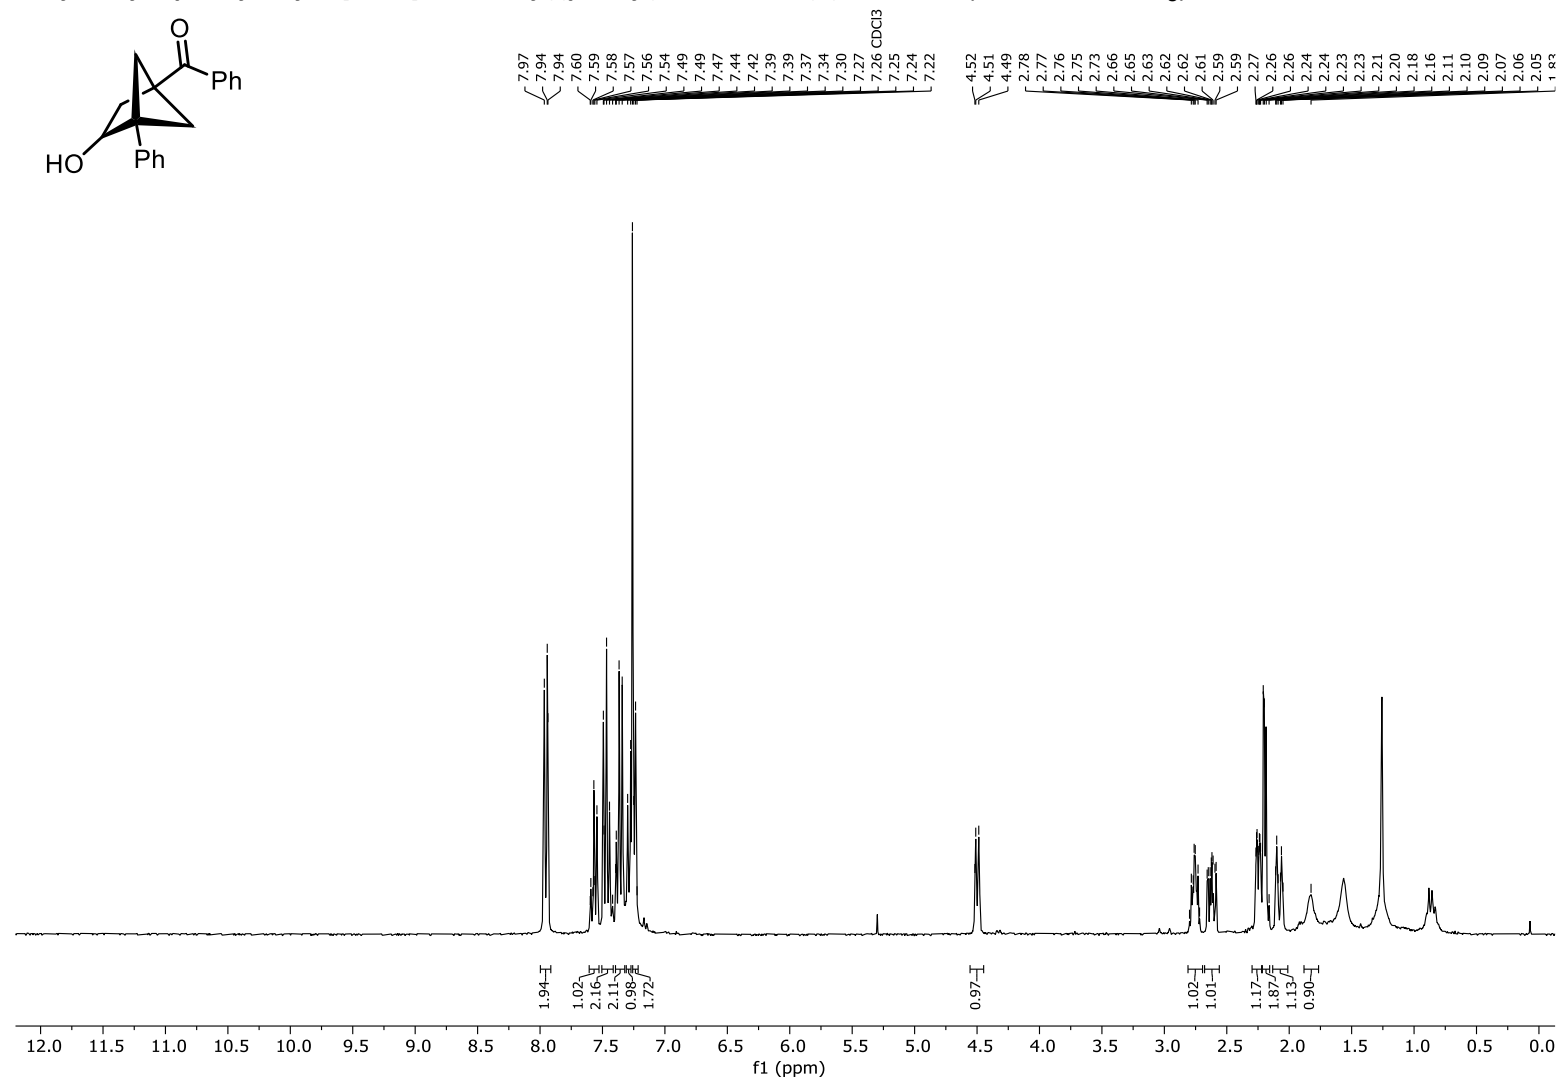

The resonances at 1.26 and 0.86 ppm are consistent with that reported for H grease.<sup>22</sup>

**3-Hydroxy-4-phenylbicyclo[2.1.1]hexan-1-yl)(phenyl)methanone (6):  $^{13}\text{C}\{^1\text{H}\}$  NMR (101 MHz,  $\text{CDCl}_3$ )**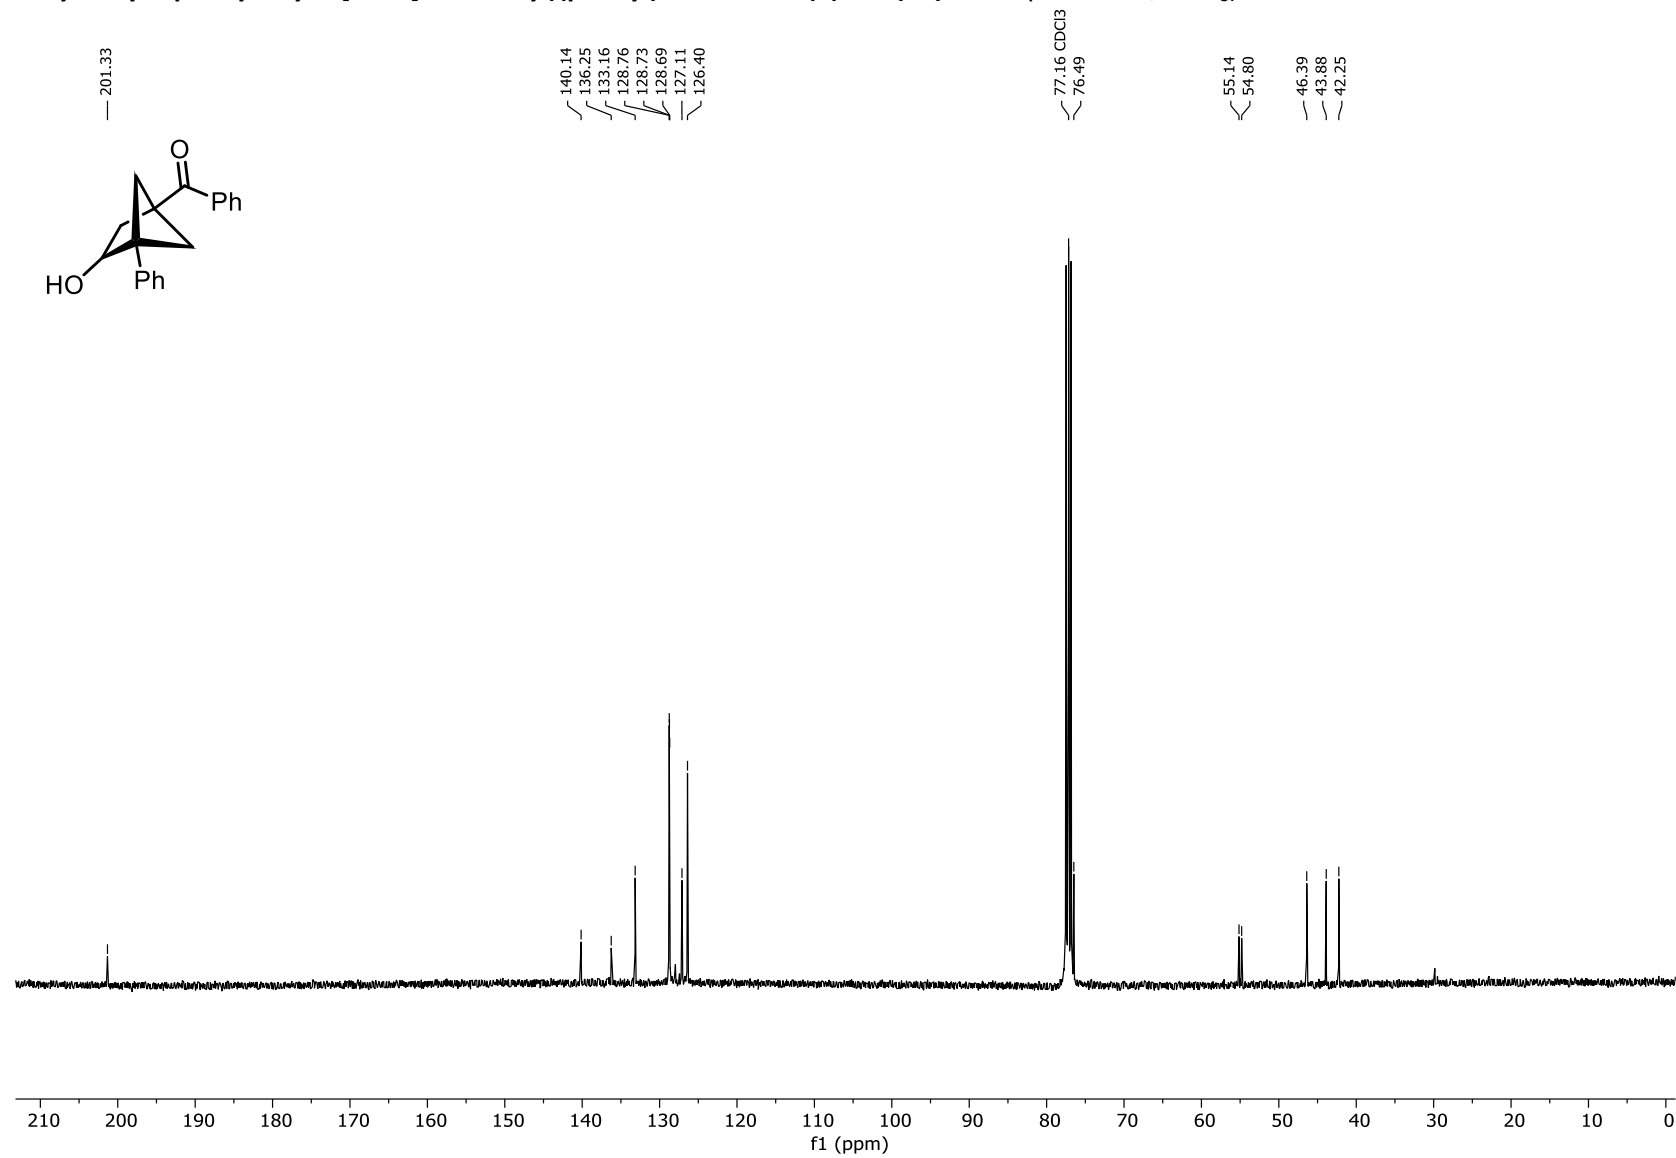

**(2S-Phenylbicyclo[2.1.1]hexan-2-yl)methanol (8):  $^1\text{H}$  NMR (500 MHz,  $\text{CDCl}_3$ )**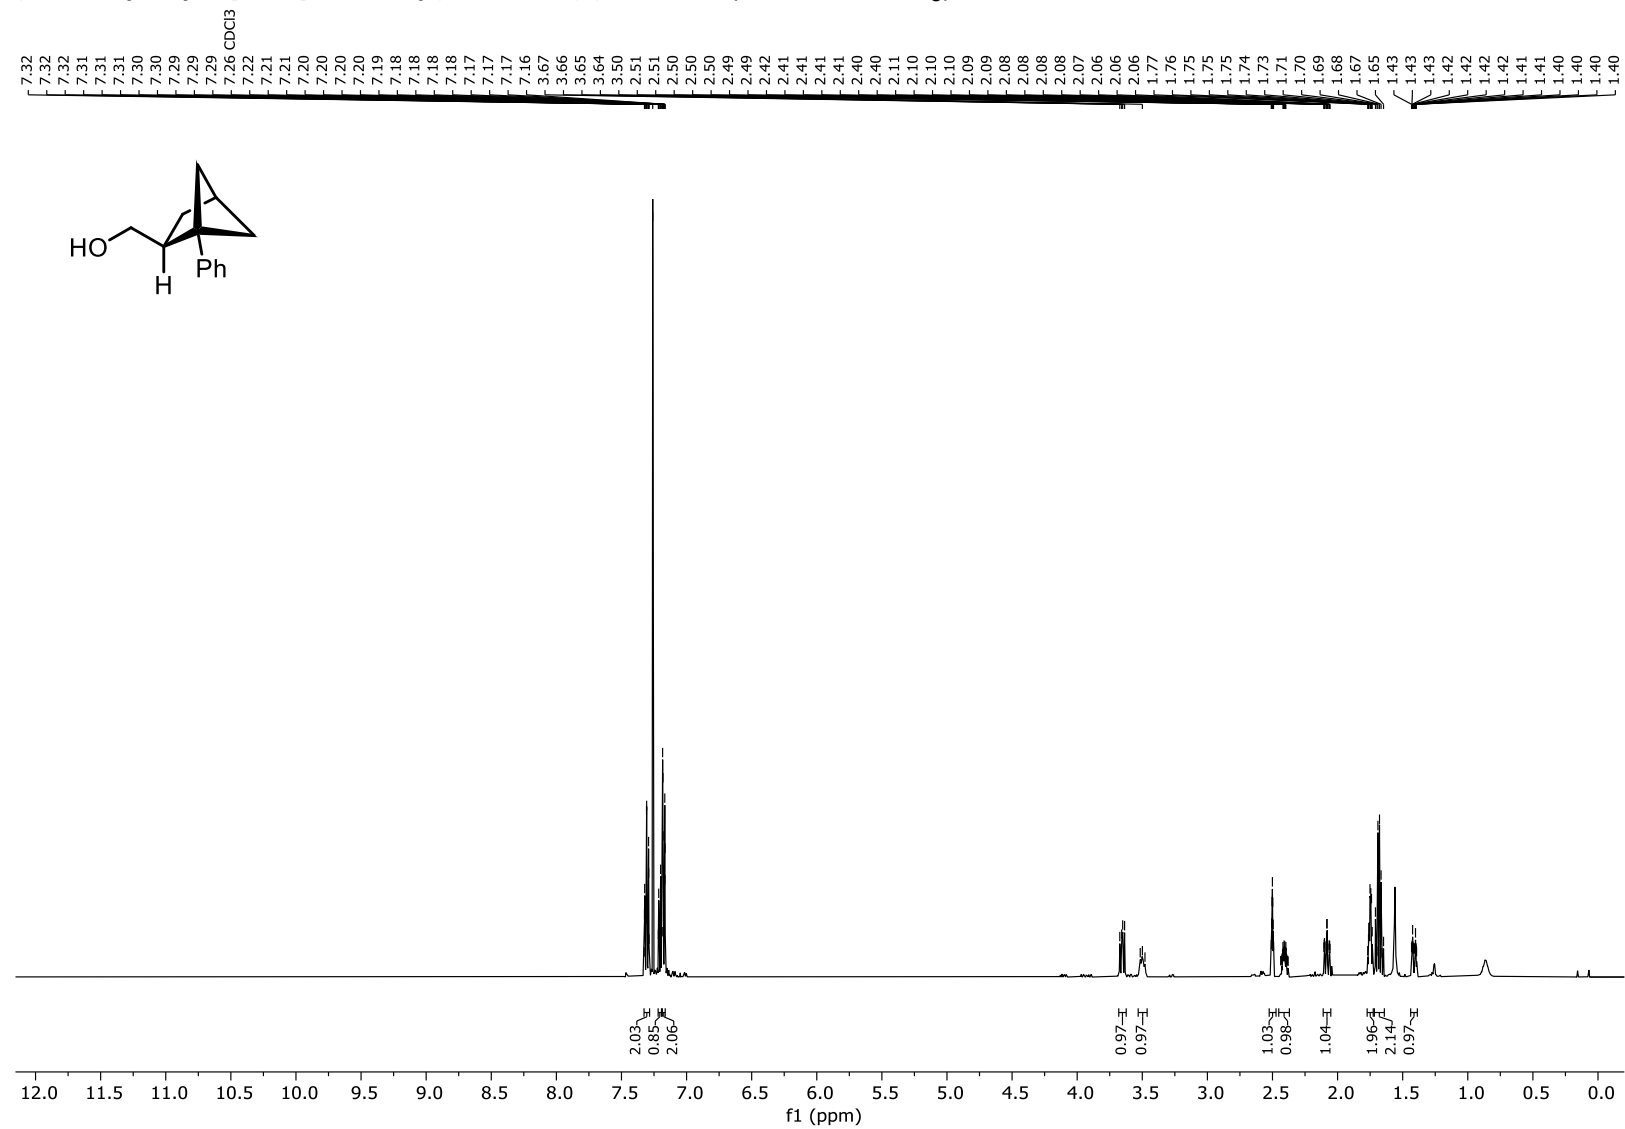



**(2S-Phenylbicyclo[2.1.1]hexan-2-yl)methanol (8):**  $^{13}\text{C}\{^1\text{H}\}$  NMR (126 MHz,  $\text{CDCl}_3$ )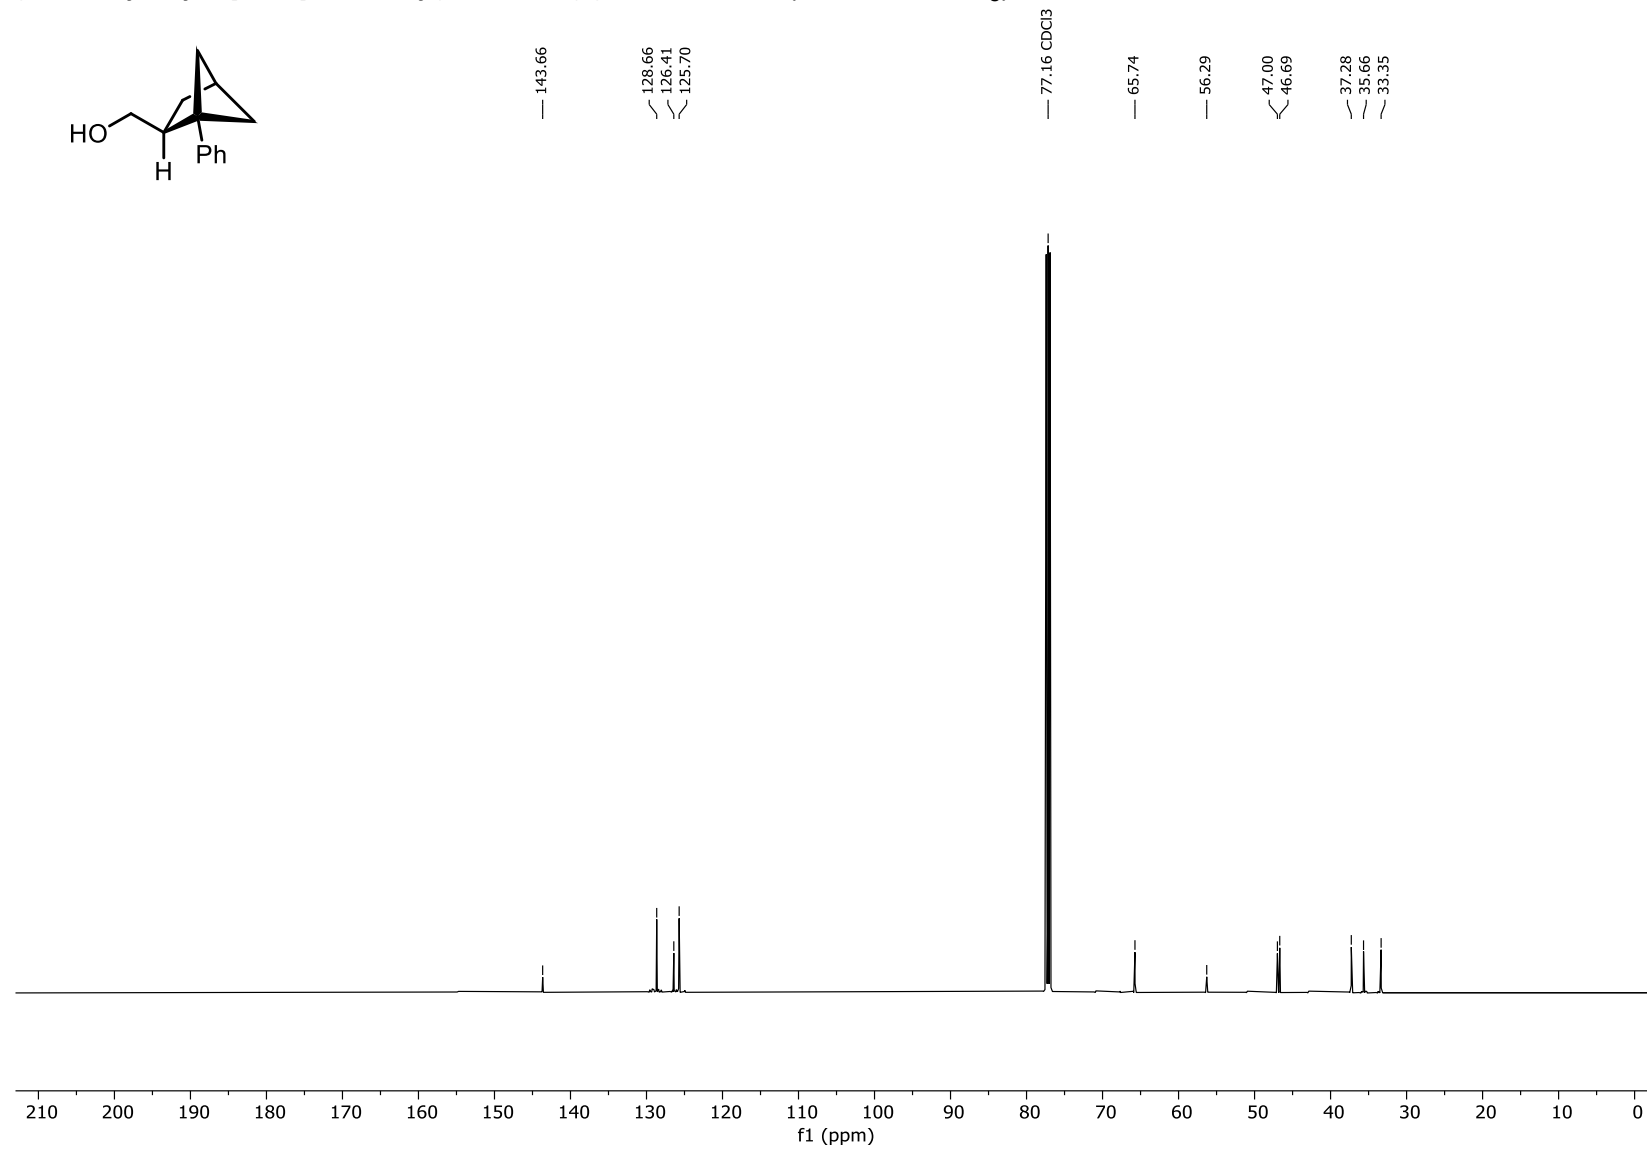

1-Phenylbicyclo[2.1.1]hexan-2-yl acetate (9):  $^1\text{H}$  NMR (300 MHz,  $\text{CDCl}_3$ )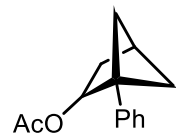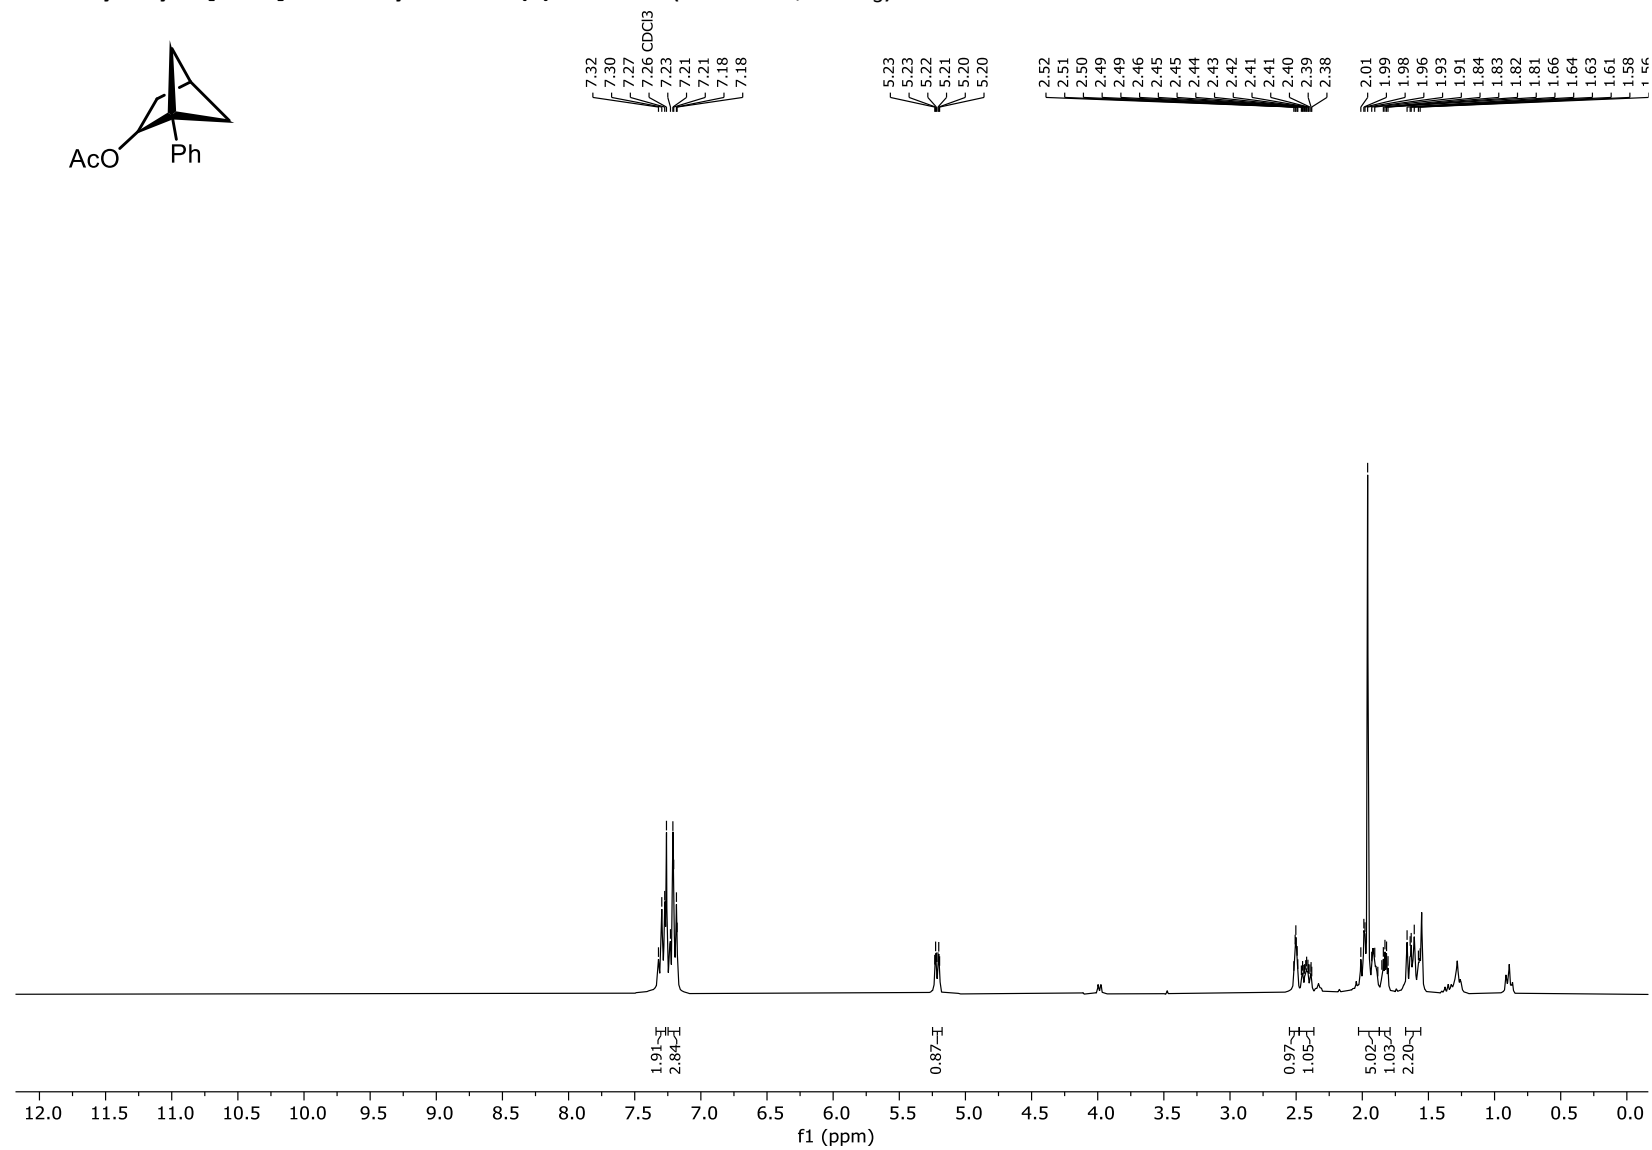

1-Phenylbicyclo[2.1.1]hexan-2-yl acetate (9):  $^{13}\text{C}\{^1\text{H}\}$  NMR (75 MHz,  $\text{CDCl}_3$ )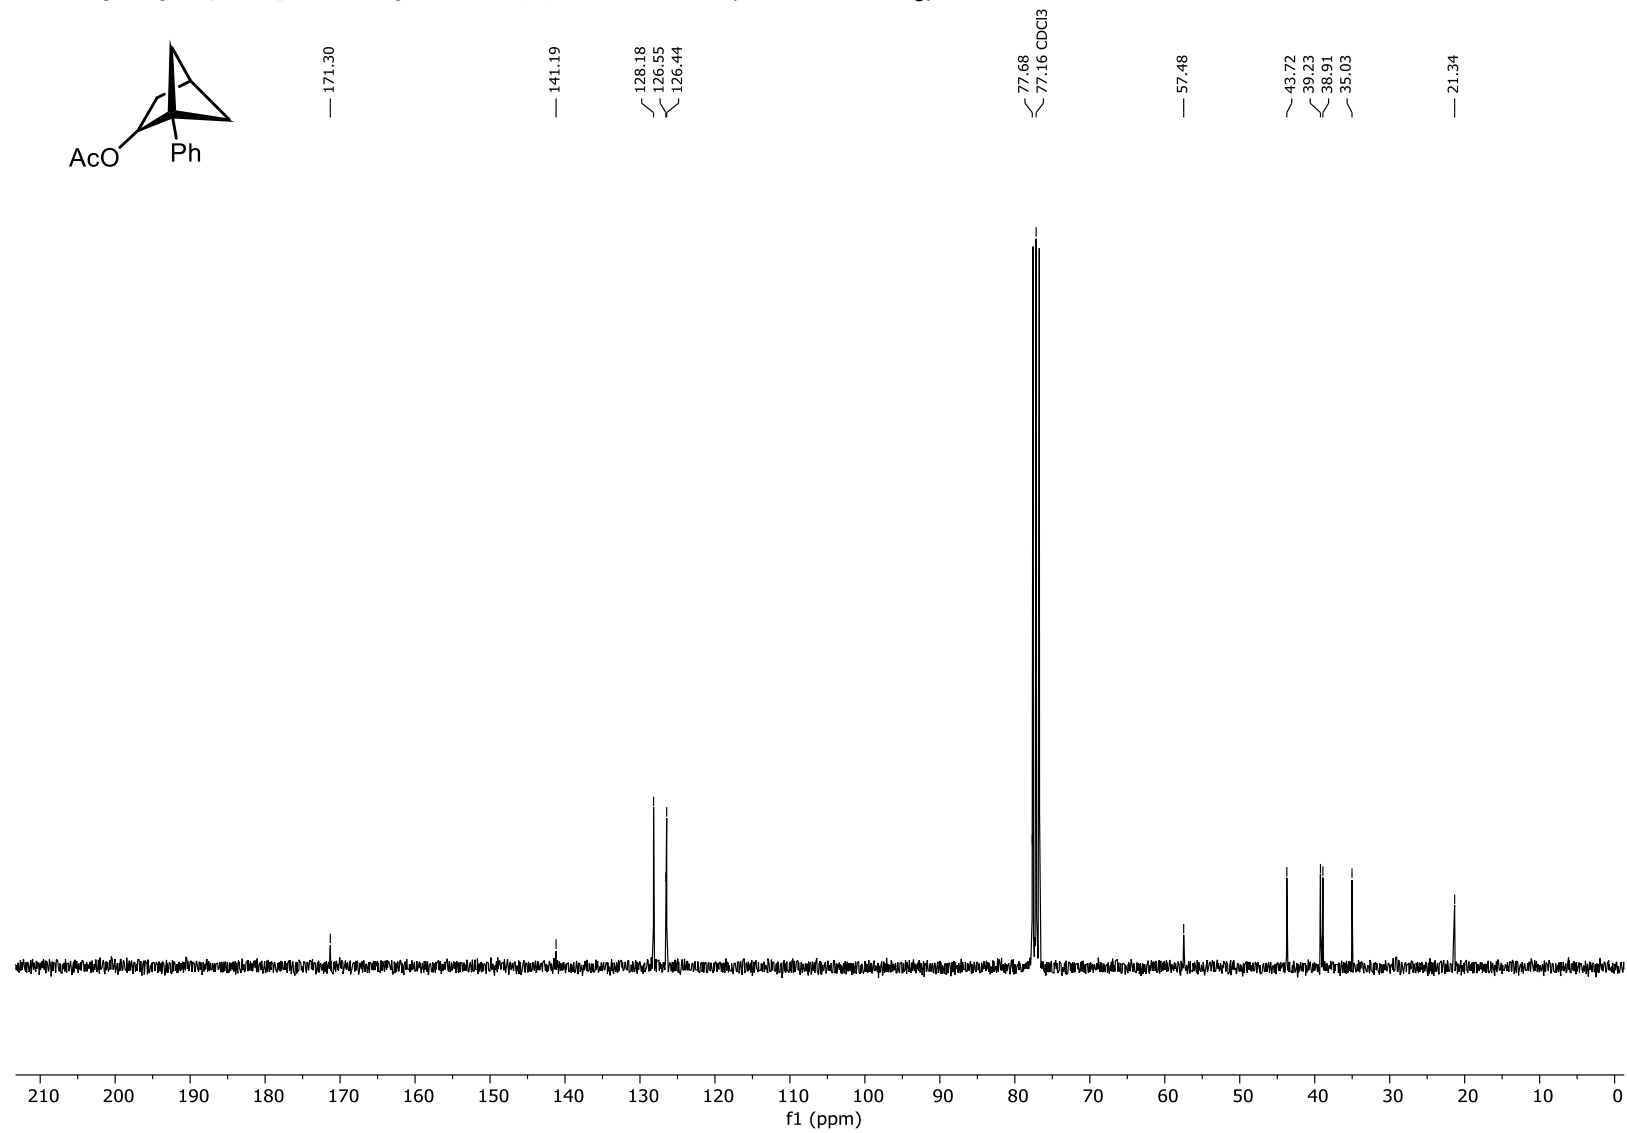

1-Phenylbicyclo[2.1.1]hexane-5-carboxylic acid (**10**):  $^1\text{H}$  NMR (300 MHz,  $\text{CDCl}_3$ )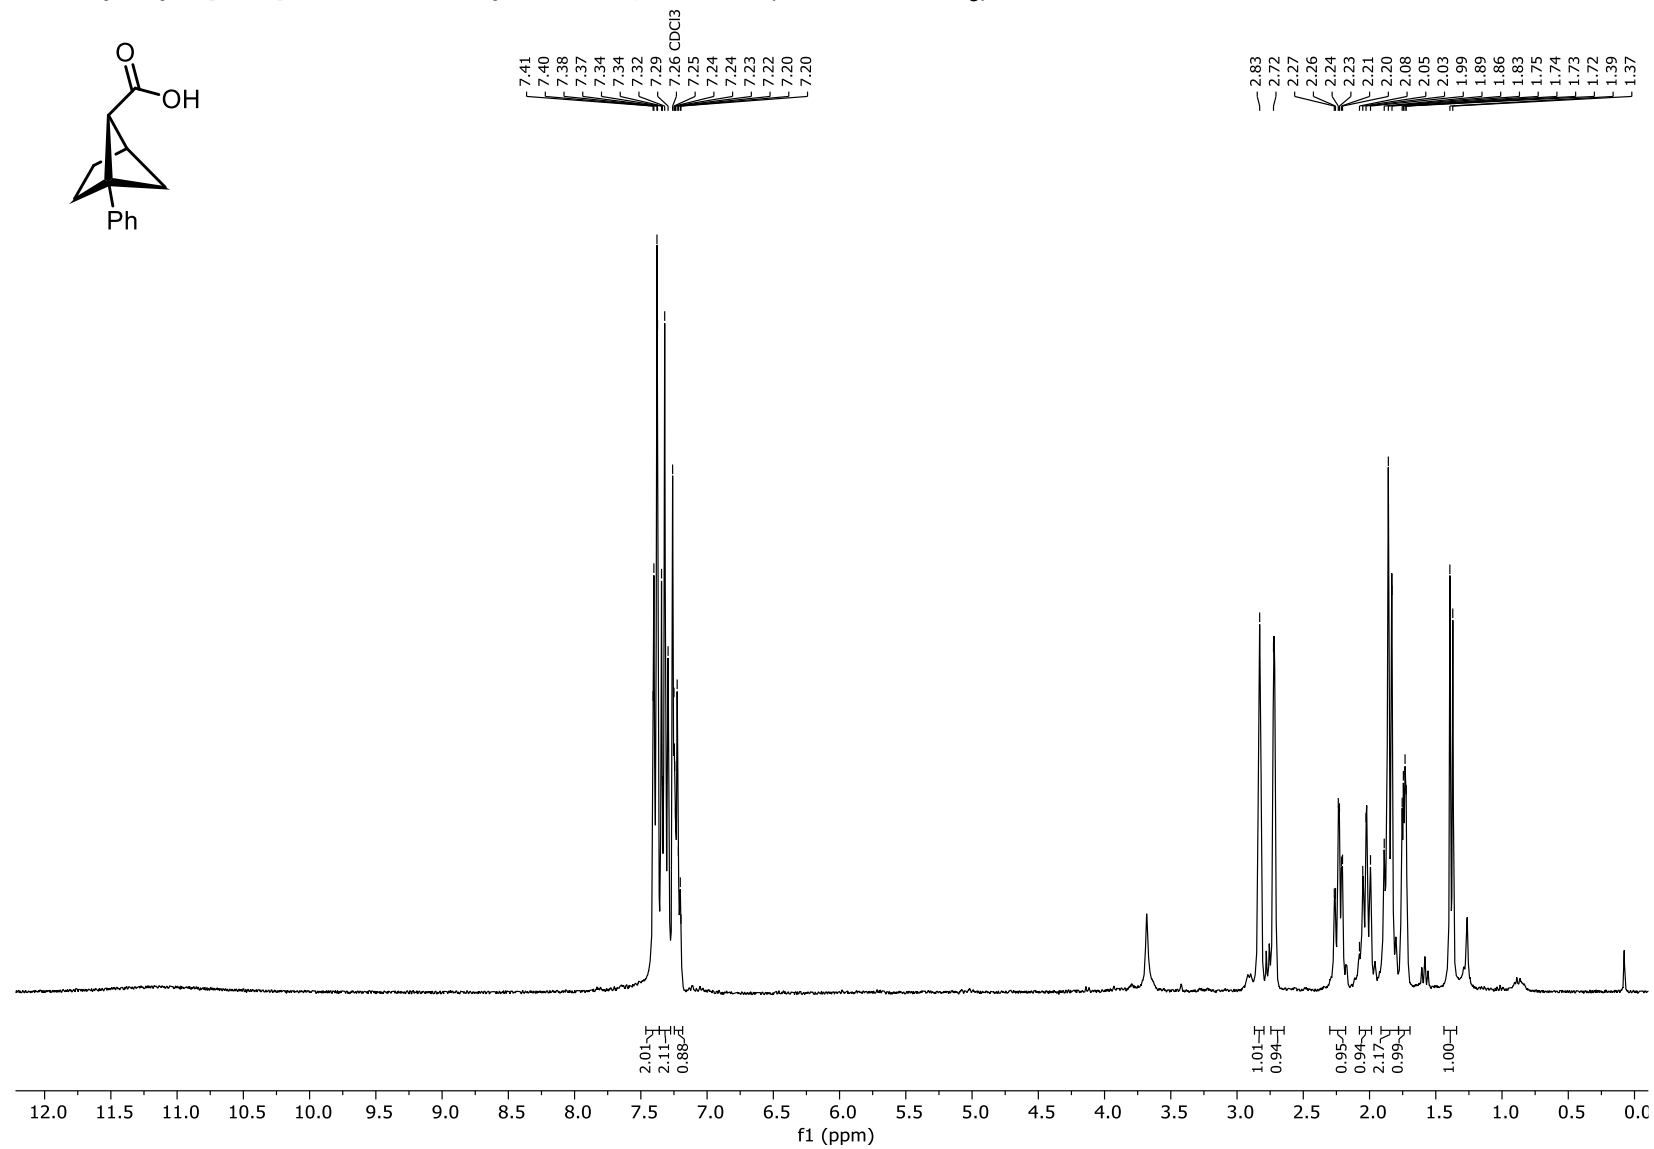

1-Phenylbicyclo[2.1.1]hexane-5-carboxylic acid (**10**):  $^{13}\text{C}\{^1\text{H}\}$  NMR (75 MHz,  $\text{CDCl}_3$ )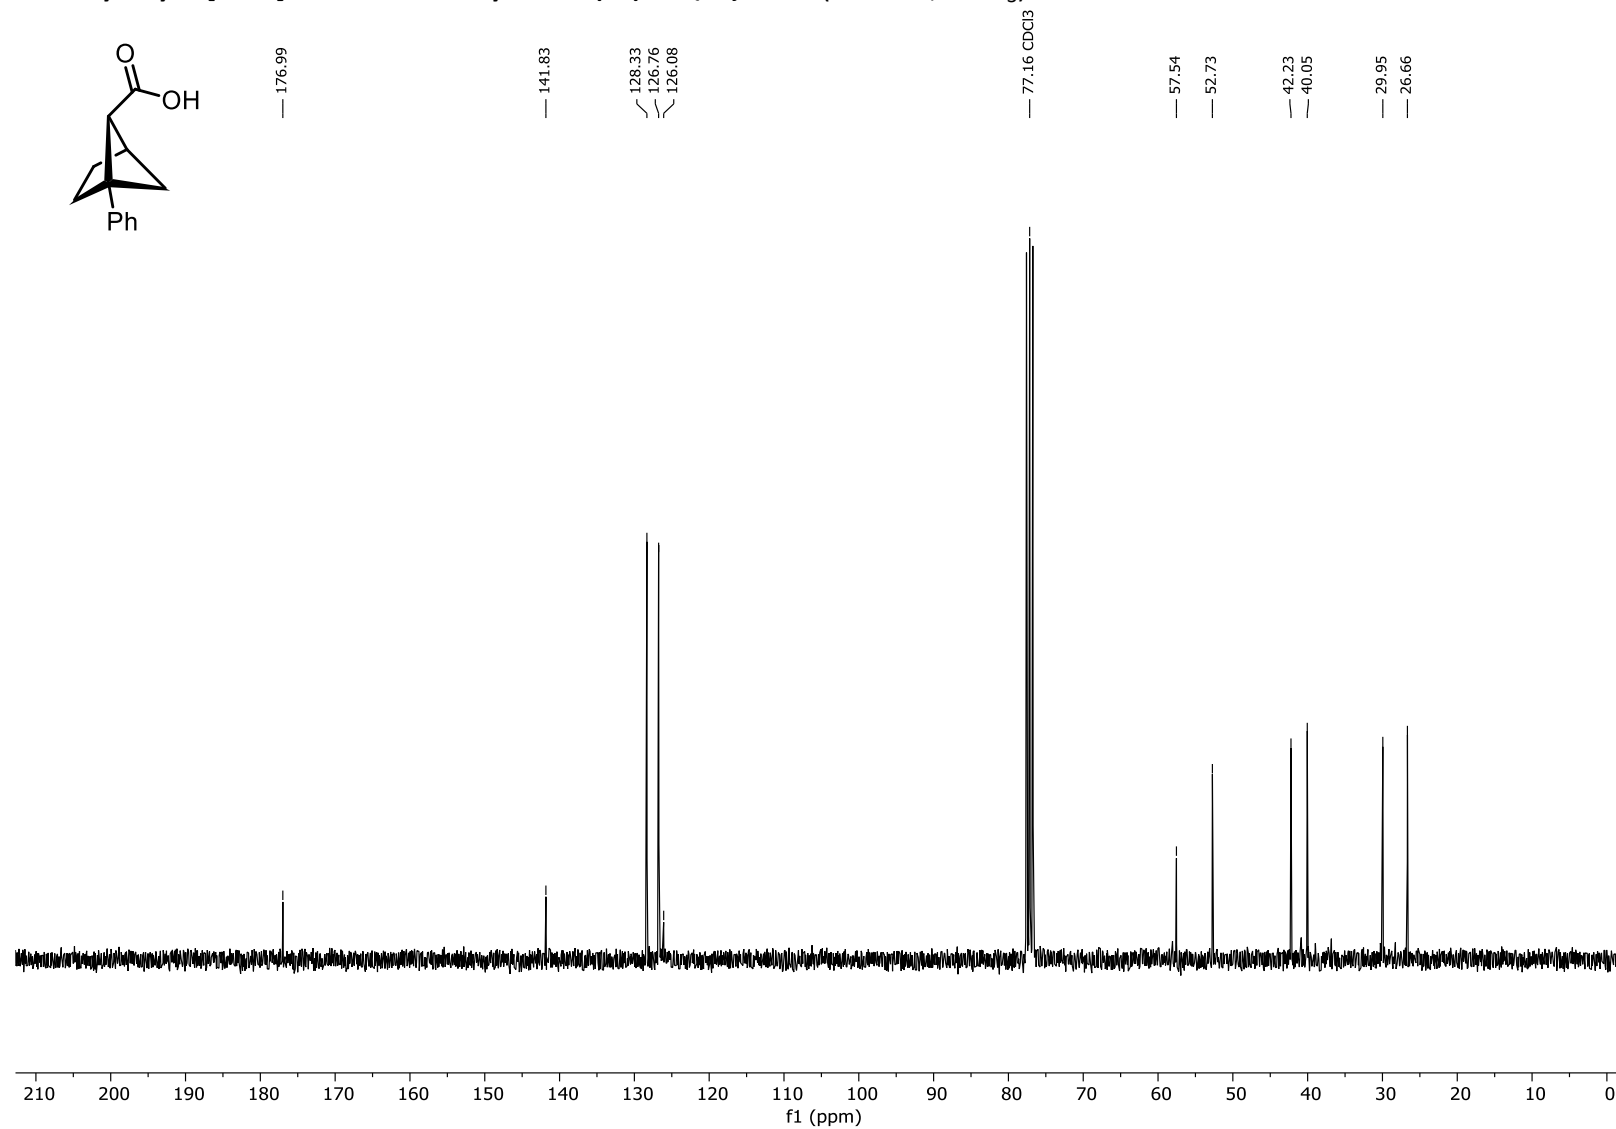

## 8 Crystallographic Supplement

Refinement table and details for 1,4-Diphenylbicyclo[2.1.1]hexane (**2a**)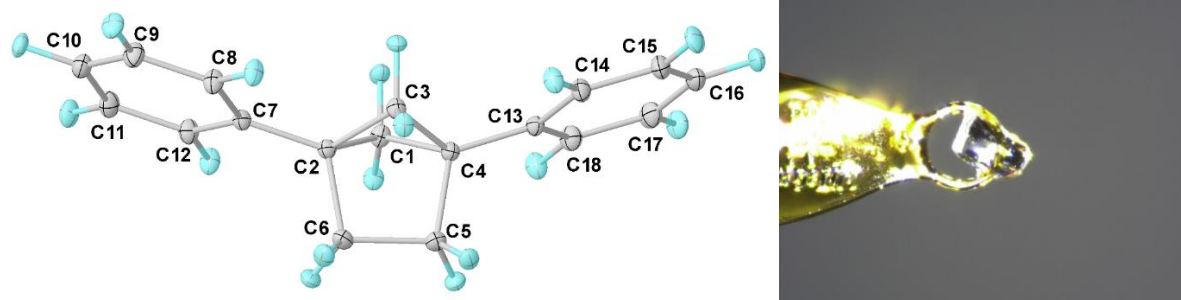Figure S2. Molecular structure of **2a** in the solid state and picture of used crystal.

Displacement ellipsoids are drawn at 50% probability level. The crystals were obtained from dichloromethane.

Table S6. Crystal data and structure refinement.

|                                        |                                         |                                             |                                                                                 |
|----------------------------------------|-----------------------------------------|---------------------------------------------|---------------------------------------------------------------------------------|
| CCDC number                            | 2262000                                 | <b>2θ</b> range [°]                         | 3.81 to 107.88<br>(0.44 Å)                                                      |
| Empirical formula                      | C <sub>18</sub> H <sub>18</sub>         |                                             |                                                                                 |
| Formula weight                         | 234.343                                 | Index ranges                                | -24 ≤ h ≤ 24<br>-13 ≤ k ≤ 13<br>-46 ≤ l ≤ 46                                    |
| Temperature [K]                        | 100                                     |                                             |                                                                                 |
| Crystal system                         | Monoclinic                              |                                             |                                                                                 |
| Space group<br>(number)                | <i>P</i> 2 <sub>1</sub> / <i>c</i> (14) | Reflections<br>collected                    | 251577                                                                          |
| <i>a</i> [Å]                           | 10.7190(15)                             | Independent<br>reflections                  | 15981<br><i>R</i> <sub>int</sub> = 0.0244<br><i>R</i> <sub>sigma</sub> = 0.0091 |
| <i>b</i> [Å]                           | 5.9192(12)                              |                                             |                                                                                 |
| <i>c</i> [Å]                           | 20.494(3)                               |                                             |                                                                                 |
| α [°]                                  | 90                                      | Completeness to<br>θ = 25.242°              | 100.0 %                                                                         |
| β [°]                                  | 94.366(6)                               |                                             |                                                                                 |
| γ [°]                                  | 90                                      | Data / Restraints /<br>Parameters           | 15981/0/325                                                                     |
| Volume [Å <sup>3</sup> ]               | 1296.5(4)                               | Goodness-of-fit on<br><i>F</i> <sup>2</sup> | 1.0841                                                                          |
| <i>Z</i>                               | 4                                       |                                             |                                                                                 |
| ρ <sub>calc</sub> [gcm <sup>-3</sup> ] | 1.201                                   | Final <i>R</i> indexes<br>[I ≥ 2σ(I)]       | <i>R</i> <sub>1</sub> = 0.0139<br><i>wR</i> <sub>2</sub> = 0.0257               |
| μ [mm <sup>-1</sup> ]                  | 0.067                                   |                                             |                                                                                 |
| <i>F</i> (000)                         | 504.248                                 | Final <i>R</i> indexes<br>[all data]        | <i>R</i> <sub>1</sub> = 0.0197<br><i>wR</i> <sub>2</sub> = 0.0273               |
| Crystal size [mm <sup>3</sup> ]        | 0.342×0.204×0.116                       |                                             |                                                                                 |
| Crystal colour                         | colourless                              | Largest peak/hole<br>[eÅ <sup>-3</sup> ]    | 0.17/-0.12                                                                      |
| Crystal shape                          | block                                   |                                             |                                                                                 |
| Radiation                              | MoK <sub>α</sub> (λ=0.71073 Å)          |                                             |                                                                                 |

Refinement table and details for 1,4-Bis(4-(trimethylsilyl)phenyl)bicyclo[2.1.1]hexane (**2g**)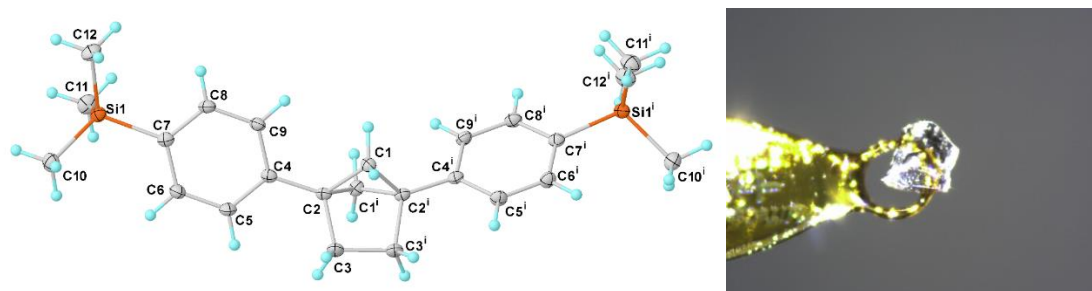

**Figure S3.** Molecular structure of **2g** in the solid state and picture of used crystal.

Second half of the molecule generated by symmetry  $i = 1-x, y, 0.5-z$ . Displacement ellipsoids are drawn at 50% probability level. The crystals were obtained from dichloromethane.

**Table S7.** Crystal data and structure refinement.

|                                            |                                                 |                                                |                                                                                |
|--------------------------------------------|-------------------------------------------------|------------------------------------------------|--------------------------------------------------------------------------------|
| <b>CCDC number</b>                         | 2262001                                         | <b>2<math>\theta</math> range [°]</b>          | 5.49 to 59.24 (0.72 Å)                                                         |
| <b>Empirical formula</b>                   | C <sub>24</sub> H <sub>34</sub> Si <sub>2</sub> |                                                |                                                                                |
| <b>Formula weight</b>                      | 378.69                                          | <b>Index ranges</b>                            | -40 ≤ h ≤ 39<br>-8 ≤ k ≤ 8<br>-14 ≤ l ≤ 16                                     |
| <b>Temperature [K]</b>                     | 100.00                                          |                                                |                                                                                |
| <b>Crystal system</b>                      | monoclinic                                      |                                                |                                                                                |
| <b>Space group (number)</b>                | <i>C</i> 2/ <i>c</i> (15)                       | <b>Reflections collected</b>                   | 20285                                                                          |
| <b><i>a</i> [Å]</b>                        | 29.688(2)                                       | <b>Independent reflections</b>                 | 3121<br><i>R</i> <sub>int</sub> = 0.0405<br><i>R</i> <sub>sigma</sub> = 0.0237 |
| <b><i>b</i> [Å]</b>                        | 6.2911(5)                                       |                                                |                                                                                |
| <b><i>c</i> [Å]</b>                        | 11.9420(8)                                      |                                                |                                                                                |
| <b>α [°]</b>                               | 90                                              | <b>Completeness to θ = 25.242°</b>             | 99.8%                                                                          |
| <b>β [°]</b>                               | 90.063(3)                                       |                                                |                                                                                |
| <b>γ [°]</b>                               | 90                                              | <b>Data / Restraints / Parameters</b>          | 3121/0/121                                                                     |
| <b>Volume [Å<sup>3</sup>]</b>              | 2230.4(3)                                       |                                                |                                                                                |
| <b><i>Z</i></b>                            | 4                                               | <b>Goodness-of-fit on <i>F</i><sup>2</sup></b> | 1.088                                                                          |
| <b>ρ<sub>calc</sub> [gcm<sup>-3</sup>]</b> | 1.128                                           | <b>Final <i>R</i> indexes [I ≥ 2σ(I)]</b>      | <i>R</i> <sub>1</sub> = 0.0377<br><i>wR</i> <sub>2</sub> = 0.0929              |
| <b>μ [mm<sup>-1</sup>]</b>                 | 0.164                                           |                                                |                                                                                |
| <b><i>F</i>(000)</b>                       | 824                                             | <b>Final <i>R</i> indexes [all data]</b>       | <i>R</i> <sub>1</sub> = 0.0452<br><i>wR</i> <sub>2</sub> = 0.0993              |
| <b>Crystal size [mm<sup>3</sup>]</b>       | 0.393×0.326×0.059                               |                                                |                                                                                |
| <b>Crystal colour</b>                      | colourless                                      | <b>Largest peak/hole [eÅ<sup>-3</sup>]</b>     | 0.41/-0.26                                                                     |
| <b>Crystal shape</b>                       | plate                                           |                                                |                                                                                |
| <b>Radiation</b>                           | MoK <sub>α</sub> (λ=0.71073 Å)                  |                                                |                                                                                |

Refinement table and details for 1,4-Di(naphthalen-2-yl)bicyclo[2.1.1]hexane (**2n**)

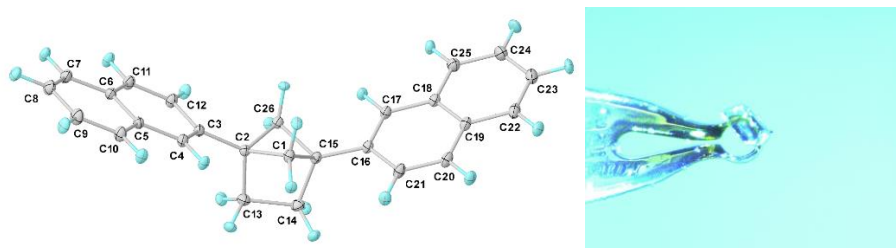

**Figure S4.** Molecular structure of **2n** in the solid state and picture of used crystal.

Displacement ellipsoids are drawn at 50% probability level. The crystals were obtained from dichloromethane.

**Table S8.** Crystal data and structure refinement.

|                                            |                                         |                                                |                                    |
|--------------------------------------------|-----------------------------------------|------------------------------------------------|------------------------------------|
| <b>CCDC number</b>                         | 2289323                                 | <b>2<math>\theta</math> range [°]</b>          | 4.68 to 67.48 (0.64 Å)             |
| <b>Empirical formula</b>                   | C <sub>26</sub> H <sub>22</sub>         |                                                |                                    |
| <b>Formula weight</b>                      | 334.464                                 | <b>Index ranges</b>                            | -27 ≤ h ≤ 27                       |
| <b>Temperature [K]</b>                     | 100.00                                  |                                                | -8 ≤ k ≤ 9                         |
| <b>Crystal system</b>                      | Monoclinic                              |                                                | -27 ≤ l ≤ 27                       |
| <b>Space group (number)</b>                | <i>P</i> 2 <sub>1</sub> / <i>c</i> (14) | <b>Reflections collected</b>                   | 93855                              |
| <b><i>a</i> [Å]</b>                        | 17.5616(13)                             | <b>Independent reflections</b>                 | 7088                               |
| <b><i>b</i> [Å]</b>                        | 5.8909(5)                               |                                                | <i>R</i> <sub>int</sub> = 0.0271   |
| <b><i>c</i> [Å]</b>                        | 17.9060(16)                             |                                                | <i>R</i> <sub>sigma</sub> = 0.0119 |
| <b>α [°]</b>                               | 90                                      | <b>Completeness to θ = 25.242°</b>             | 100.0 %                            |
| <b>β [°]</b>                               | 106.549(4)                              | <b>Data / Restraints / Parameters</b>          | 7088/0/433                         |
| <b>γ [°]</b>                               | 90                                      | <b>Goodness-of-fit on <i>F</i><sup>2</sup></b> | 1.0321                             |
| <b>Volume [Å<sup>3</sup>]</b>              | 1775.7(3)                               | <b>Final <i>R</i> indexes [I ≥ 2σ(I)]</b>      | <i>R</i> <sub>1</sub> = 0.0130     |
| <b><i>Z</i></b>                            | 4                                       |                                                | <i>wR</i> <sub>2</sub> = 0.0233    |
| <b>ρ<sub>calc</sub> [gcm<sup>-3</sup>]</b> | 1.251                                   | <b>Final <i>R</i> indexes [all data]</b>       | <i>R</i> <sub>1</sub> = 0.0179     |
| <b>μ [mm<sup>-1</sup>]</b>                 | 0.070                                   |                                                | <i>wR</i> <sub>2</sub> = 0.0253    |
| <b><i>F</i>(000)</b>                       | 712.358                                 | <b>Largest peak/hole [eÅ<sup>-3</sup>]</b>     | 0.11/-0.10                         |
| <b>Crystal size [mm<sup>3</sup>]</b>       | 0.294×0.168×0.131                       |                                                |                                    |
| <b>Crystal colour</b>                      | Colorless                               |                                                |                                    |
| <b>Crystal shape</b>                       | Block                                   |                                                |                                    |
| <b>Radiation</b>                           | Mo K <sub>α</sub> (λ=0.71073 Å)         |                                                |                                    |



Refinement table and details for (S)-4-benzyl-3-((2S)-1-phenylbicyclo[2.1.1]hexane-2-carbonyl)oxazolidin-2-one (**2r**):

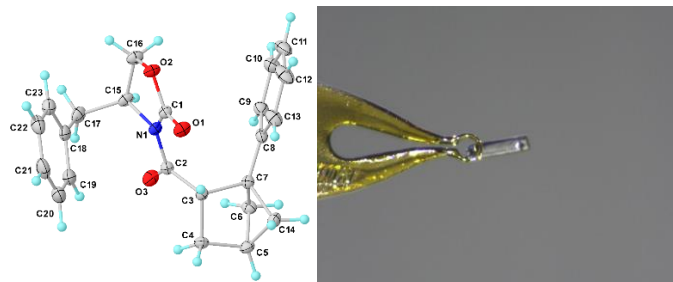

Figure S5. Molecular structure of **2r** in the solid state and picture of used crystal.

Displacement ellipsoids are drawn at 50% probability level. The crystals were obtained from ethylacetate.

Table S9. Crystal data and structure refinement.

|                                                    |                                       |                                                                |                                             |
|----------------------------------------------------|---------------------------------------|----------------------------------------------------------------|---------------------------------------------|
| <b>CCDC number</b>                                 | 2289325                               | <b>Index ranges</b>                                            | $-7 \leq h \leq 7$                          |
| <b>Empirical formula</b>                           | $C_{23}H_{23}NO_3$                    |                                                                | $-20 \leq k \leq 20$                        |
| <b>Formula weight</b>                              | 361.42                                | <b>Reflections collected</b>                                   | $-23 \leq l \leq 23$                        |
| <b>Temperature [K]</b>                             | 100.00                                |                                                                | 60017                                       |
| <b>Crystal system</b>                              | Orthorhombic                          | <b>Independent reflections</b>                                 | 4010                                        |
| <b>Space group (number)</b>                        | $P2_12_12_1$ (19)                     |                                                                | $R_{int} = 0.0486$<br>$R_{\sigma} = 0.0157$ |
| <b><i>a</i> [Å]</b>                                | 6.2717(8)                             | <b>Completeness to <math>\theta = 25.242^\circ</math></b>      | 100.0 %                                     |
| <b><i>b</i> [Å]</b>                                | 16.1815(16)                           |                                                                |                                             |
| <b><i>c</i> [Å]</b>                                | 18.3606(18)                           |                                                                |                                             |
| <b><math>\alpha</math> [°]</b>                     | 90                                    | <b>Data / Restraints / Parameters</b>                          | 4010/0/337                                  |
| <b><math>\beta</math> [°]</b>                      | 90                                    |                                                                |                                             |
| <b><math>\gamma</math> [°]</b>                     | 90                                    | <b>Goodness-of-fit on <math>F^2</math></b>                     | 1.021                                       |
| <b>Volume [Å<sup>3</sup>]</b>                      | 1863.3(4)                             |                                                                |                                             |
| <b>Z</b>                                           | 4                                     | <b>Final <i>R</i> indexes [<math>I \geq 2\sigma(I)</math>]</b> | $R_1 = 0.0241$<br>$wR_2 = 0.0634$           |
| <b><math>\rho_{calc}</math> [gcm<sup>-3</sup>]</b> | 1.288                                 |                                                                |                                             |
| <b><math>\mu</math> [mm<sup>-1</sup>]</b>          | 0.680                                 | <b>Final <i>R</i> indexes [all data]</b>                       | $R_1 = 0.0246$<br>$wR_2 = 0.0637$           |
| <b><i>F</i>(000)</b>                               | 768                                   |                                                                |                                             |
| <b>Crystal size [mm<sup>3</sup>]</b>               | 0.376×0.066×0.052                     | <b>Largest peak/hole [eÅ<sup>-3</sup>]</b>                     | 0.21/-0.12                                  |
| <b>Crystal colour</b>                              | Colorless                             |                                                                |                                             |
| <b>Crystal shape</b>                               | Needle                                | <b>Flack X parameter</b>                                       | -0.04(3)                                    |
| <b>Radiation</b>                                   | $CuK_\alpha$ ( $\lambda = 1.54178$ Å) | <b>Extinction coefficient</b>                                  | 0.0029(3)                                   |
| <b>2<math>\theta</math> range [°]</b>              | 7.28 to 159.46 (0.78 Å)               |                                                                |                                             |

Refinement table and details for 3-(4-Fluorophenyl)-1-phenylbicyclo[2.1.1]hexane (**2s**)

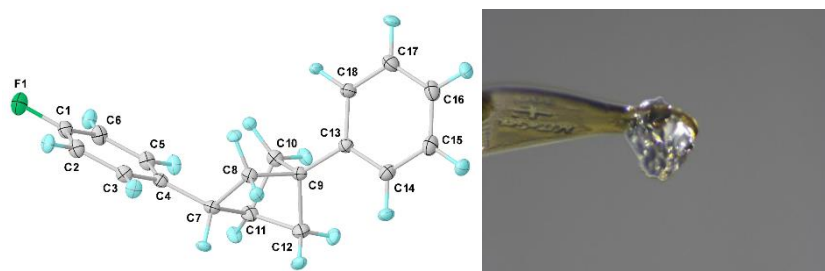

Figure S6. Molecular structure of **2s** in the solid state and picture of used crystal

Displacement ellipsoids are drawn at 50% probability level. The crystals were obtained from dichloromethane.

Table S10. Crystal data and structure refinement.

|                                        |                                         |                                          |                                                                                |
|----------------------------------------|-----------------------------------------|------------------------------------------|--------------------------------------------------------------------------------|
| CCDC number                            | 2289324                                 | $2\theta$ range [°]                      | 4.44 to 67.52 (0.64 Å)                                                         |
| Empirical formula                      | C <sub>18</sub> H <sub>17</sub> F       |                                          |                                                                                |
| Formula weight                         | 252.334                                 | Index ranges                             | -15 ≤ h ≤ 15<br>-8 ≤ k ≤ 9<br>-33 ≤ l ≤ 32                                     |
| Temperature [K]                        | 100.00                                  |                                          |                                                                                |
| Crystal system                         | Monoclinic                              |                                          |                                                                                |
| Space group (number)                   | <i>P</i> 2 <sub>1</sub> / <i>n</i> (14) | Reflections collected                    | 47752                                                                          |
| <i>a</i> [Å]                           | 10.1015(9)                              | Independent reflections                  | 5339<br><i>R</i> <sub>int</sub> = 0.0351<br><i>R</i> <sub>sigma</sub> = 0.0176 |
| <i>b</i> [Å]                           | 6.0988(5)                               |                                          |                                                                                |
| <i>c</i> [Å]                           | 21.7233(17)                             |                                          |                                                                                |
| α [°]                                  | 90                                      | Completeness to θ = 25.242°              | 99.7 %                                                                         |
| β [°]                                  | 90.575(4)                               |                                          |                                                                                |
| γ [°]                                  | 90                                      | Data / Restraints / Parameters           | 5339/0/325                                                                     |
| Volume [Å <sup>3</sup> ]               | 1338.24(19)                             | Goodness-of-fit on <i>F</i> <sup>2</sup> | 1.1368                                                                         |
| <i>Z</i>                               | 4                                       |                                          |                                                                                |
| ρ <sub>calc</sub> [gcm <sup>-3</sup> ] | 1.252                                   | Final <i>R</i> indexes [I ≥ 2σ(I)]       | <i>R</i> <sub>1</sub> = 0.0190<br><i>wR</i> <sub>2</sub> = 0.0453              |
| μ [mm <sup>-1</sup> ]                  | 0.080                                   |                                          |                                                                                |
| <i>F</i> (000)                         | 536.320                                 | Final <i>R</i> indexes [all data]        | <i>R</i> <sub>1</sub> = 0.0219<br><i>wR</i> <sub>2</sub> = 0.0469              |
| Crystal size [mm <sup>3</sup> ]        | 0.485×0.312×0.282                       |                                          |                                                                                |
| Crystal colour                         | Colorless                               | Largest peak/hole [eÅ <sup>-3</sup> ]    | 0.27/-0.11                                                                     |
| Crystal shape                          | Block                                   |                                          |                                                                                |
| Radiation                              | Mo <i>K</i> <sub>α</sub> (λ=0.71073 Å)  |                                          |                                                                                |

Refinement table and details for (1*s*,4*s*)-2,2,3,3-tetrafluoro-1,4-diphenylbicyclo[2.1.1]hexane (**2ab**)

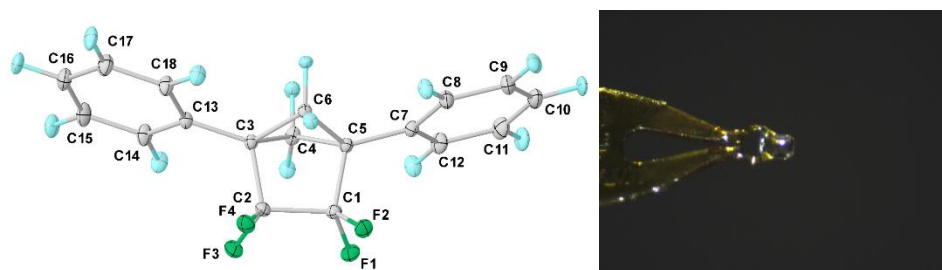

**Figure S7.** Molecular structure of **2ab** in the solid state and picture of used crystal.

Displacement ellipsoids are drawn at 50% probability level. The crystals were obtained from dichloromethane.

**Table S11.** Crystal data and structure refinement.

|                                            |                                                |                                                  |                                                                                 |
|--------------------------------------------|------------------------------------------------|--------------------------------------------------|---------------------------------------------------------------------------------|
| <b>CCDC number</b>                         | 2261999                                        | <b>2<math>\theta</math> range [°]</b>            | 3.98 to 86.27 (0.52 Å)                                                          |
| <b>Empirical formula</b>                   | C <sub>18</sub> H <sub>14</sub> F <sub>4</sub> |                                                  |                                                                                 |
| <b>Formula weight</b>                      | 306.29                                         | <b>Index ranges</b>                              | -20 ≤ h ≤ 20<br>-12 ≤ k ≤ 12<br>-39 ≤ l ≤ 39                                    |
| <b>Temperature [K]</b>                     | 100.00                                         |                                                  |                                                                                 |
| <b>Crystal system</b>                      | monoclinic                                     |                                                  |                                                                                 |
| <b>Space group (number)</b>                | <i>P</i> 2 <sub>1</sub> / <i>c</i> (14)        | <b>Reflections collected</b>                     | 182274                                                                          |
| <b><i>a</i> [Å]</b>                        | 10.8425(8)                                     | <b>Independent reflections</b>                   | 10412<br><i>R</i> <sub>int</sub> = 0.0431<br><i>R</i> <sub>sigma</sub> = 0.0133 |
| <b><i>b</i> [Å]</b>                        | 6.2990(8)                                      |                                                  |                                                                                 |
| <b><i>c</i> [Å]</b>                        | 20.5750(19)                                    |                                                  |                                                                                 |
| <b>α [°]</b>                               | 90                                             | <b>Completeness to θ = 25.242°</b>               | 100.0 %                                                                         |
| <b>β [°]</b>                               | 96.030(2)                                      |                                                  |                                                                                 |
| <b>γ [°]</b>                               | 90                                             | <b>Data / Restraints / Parameters</b>            | 10411/4/325                                                                     |
| <b>Volume [Å<sup>3</sup>]</b>              | 1397.4(2)                                      |                                                  |                                                                                 |
| <b><i>Z</i></b>                            | 4                                              | <b>Goodness-of-fit on <i>F</i><sup>2</sup></b>   | 1.063                                                                           |
| <b>ρ<sub>calc</sub> [gcm<sup>-3</sup>]</b> | 1.456                                          |                                                  |                                                                                 |
| <b>μ [mm<sup>-1</sup>]</b>                 | 0.121                                          | <b>Final <i>R</i> indexes [I ≥ 2σ(<i>I</i>)]</b> | <i>R</i> <sub>1</sub> = 0.0193<br><i>wR</i> <sub>2</sub> = 0.0428               |
| <b><i>F</i>(000)</b>                       | 632                                            |                                                  |                                                                                 |
| <b>Crystal size [mm<sup>3</sup>]</b>       | 0.175×0.121×0.078                              | <b>Final <i>R</i> indexes [all data]</b>         | <i>R</i> <sub>1</sub> = 0.0256<br><i>wR</i> <sub>2</sub> = 0.0455               |
| <b>Crystal colour</b>                      | colourless                                     |                                                  |                                                                                 |
| <b>Crystal shape</b>                       | block                                          | <b>Largest peak/hole [eÅ<sup>-3</sup>]</b>       | 0.26/-0.18                                                                      |
| <b>Radiation</b>                           | MoK <sub>α</sub> (λ=0.71073 Å)                 |                                                  |                                                                                 |

## 9 References

- 1 W. C. Still, M. Khan and A. Mitra, *J. Org. Chem.*, 1978, **43**, 2923–2925.
- 2 G. M. Sheldrick, *Acta Crystallogr. A*, 2008, **A64**, 112–122.
- 3 a) O. V. Dolomanov, L. J. Bourhis, R. J. Gildea, J. A. K. Howard and H. Puschmann, *J. Appl. Crystallogr.*, 2009, **42**, 339–341; b) D. Kratzert, *FinalCif*, V106, <https://dkratzert.de/finalcif.html>.
- 4 T. Kottke and D. Stalke, *J. Appl. Cryst.*, 1993, **26**, 615–619.
- 5 F. Kleemiss, O.V. Dolomanov, M. Bodensteiner, N. Peyerimhoff, M. Midgley, L.J. Bourhis, A. Genoni, L.A. Malaspina, D. Jayatilaka, J.L. Spencer, F. White, B. Grundkoetter-Stock, S. Steinhauer, D. Lentz, H. Puschmann and S. Grabowsky, *Chem. Sci.*, 2021, **12**, 1675–1692.
- 6 M. Golfmann, L. Glagow, A. Giakoumidakis, C. Golz and J. C. L. Walker, *Chem. Eur. J.*, 2023, **29**, e202202373.
- 7 M. Y. Wong, S. Krotkus, G. Copley, W. Li, C. Murawski, D. Hall, G. J. Hedley, M. Jaricot, D. B. Cordes, A. M. Z. Slawin, Y. Olivier, D. Beljonne, L. Muccioli, M. Moral, J.-C. Sancho-Garcia, M. C. Gather, I. D. W. Samuel and E. Zysman-Colman, *ACS Appl. Mater. Interfaces.*, 2018, **10**, 33360–33372.
- 8 E. Speckmeier, T. G. Fischer and K. Zeitler, *J. Am. Chem. Soc.*, 2018, **140**, 15353–15365.
- 9 K. P. Bryliakov, E. P. Talsi and M. Bochmann, *Organometallics*, 2003, **23**, 149–152.
- 10 C. Peppe and R. P. das Chagas, *Synlett*, 2004, 1187–1190.
- 11 D. V. Gribkov, K. C. Hultsch and F. Hampel, *J. Am. Chem. Soc.*, 2006, **128**, 3748–3759.
- 12 M. Imai, M. Tanaka, K. Tanaka, Y. Yamamoto, N. Imai-Ogata, M. Shimowatari, S. Nagumo, N. Kawahara and H. Suemune, *J. Org. Chem.*, 2004, **69**, 1144–1150.
- 13 a) K. Moriyama, T. Hamada, Y. Nakamura and H. Togo, *Chem. Commun.*, 2017, **53**, 6565–6568; b) X.-Y. Guan, Z. Al-Misba'a and K.-W. Huang, *Arab. J. Chem.*, 2015, **8**, 892–896.
- 14 H. Ikeda, K. Matsuo, Y. Matsui, M. Matsuoka and K. Mizuno, *Bull. Chem. Soc. Jpn.*, 2011, **84**, 537–543.
- 15 S. A. Chacko, P. G. Wenthold, *J. Org. Chem.* 2006, **72**, 494–501.
- <sup>16</sup> R. Liu, Z. Yang, Y. Ni, K. Song, K. Shen, S. Lin, Q. Pan, *J. Org. Chem.* 2017, **82**, 15, 8023–8030.
- <sup>17</sup> M. S. Chen, P. Narayanasamy, N. A. Labenz, M. C. White, *J. Am. Chem. Soc.* 2005, **127**, **19**, 6970–6971.
- <sup>18</sup> A. Shimizu, G. Hirata, G. Onodera and M. Kimura, *Adv. Synth. Catal.*, 2018, **360**, 1954–1960.
- <sup>19</sup> R. Liu, Z. Yang, Y. Ni, K. Song, K. Shen, S. Lin, Q. Pan, *J. Org. Chem.* 2017, **82**, 15, 8023–8030.
- <sup>20</sup> A. Denisenko, P. Garbuz, S. V. Shishkina, N. M. Voloshchuk and P. K. Mykhailiuk, *Angew. Chem. Int. Ed.*, 2020, **59**, 20515–20521.
- <sup>21</sup> A. Denisenko, P. Garbuz, S. V. Shishkina, N. M. Voloshchuk, P. K. Mykhailiuk, *Angew. Chem.* 2020, **132**, 20696–20702.
- <sup>22</sup> G. R. Fulmer, A. J. M. Miller, N. H. Sherden, H. E. Gottlieb, A. Nudelman, B. M. Stoltz, J. E. Bercaw and K. I. Goldberg, *Organometallics*, 2010, **29**, 2176–2179.
